# Supplementary material for: Exploring Metabolic Signatures of Ex Vivo Tumor Tissue Cultures for Prediction of Chemosensitivity in Ovarian Cancer
Source: MDPI journal article supplement (doi:10.3390/cancers14184460), 2022-09-14
Supplement: s1 [file s1]

# Supplementary File S1

## Exploring Metabolic Signatures of Ovarian Cancer Ex Vivo Models to Predict Drug Efficacy

Rita Mendes <sup>1,2</sup>, Gonçalo Graça <sup>3</sup>, Fernanda Silva <sup>4</sup>, Ana C. L. Guerreiro <sup>1,2</sup>,  
Patrícia Gomes-Alves <sup>1,2</sup>, Jacinta Serpa <sup>4,5</sup>, Erwin R. Boghaert <sup>6</sup>, Ana Félix <sup>4,5</sup>,  
Catarina Brito <sup>1,2</sup>, Inês A. Isidro <sup>1,2,\*</sup>

<sup>1</sup> iBET, Instituto de Biologia Experimental e Tecnológica, Apartado 12, 2781-901 Oeiras, Portugal

<sup>2</sup> Instituto de Tecnologia Química e Biológica António Xavier, Universidade Nova de Lisboa, Av. da República, 2780-157 Oeiras, Portugal

<sup>3</sup> Department of Metabolism, Digestion and Reproduction, Imperial College London, London SW7 2AZ, UK

<sup>4</sup> iNOVA4Health, NOVA Medical School/Faculdade de Ciências Médicas, Universidade NOVA de Lisboa, Campo dos Mártires da Pátria, 130, 1169-056 Lisboa, Portugal

<sup>5</sup> Molecular Pathobiology Unit, Instituto Português de Oncologia de Lisboa Francisco Gentil (IPOLFG), Rua Prof. Lima Basto, 1099-023 Lisboa, Portugal

<sup>6</sup> AbbVie, 1 North Waukegan Road, North Chicago, IL 60064-6098, USA

<sup>7</sup> Pathology Department, Instituto Português de Oncologia de Lisboa Francisco Gentil (IPOLFG), Rua Prof. Lima Basto, 1099-023 Lisboa, Portugal

\* Correspondence: [iaisidro@ibet.pt](mailto:iaisidro@ibet.pt)

**A**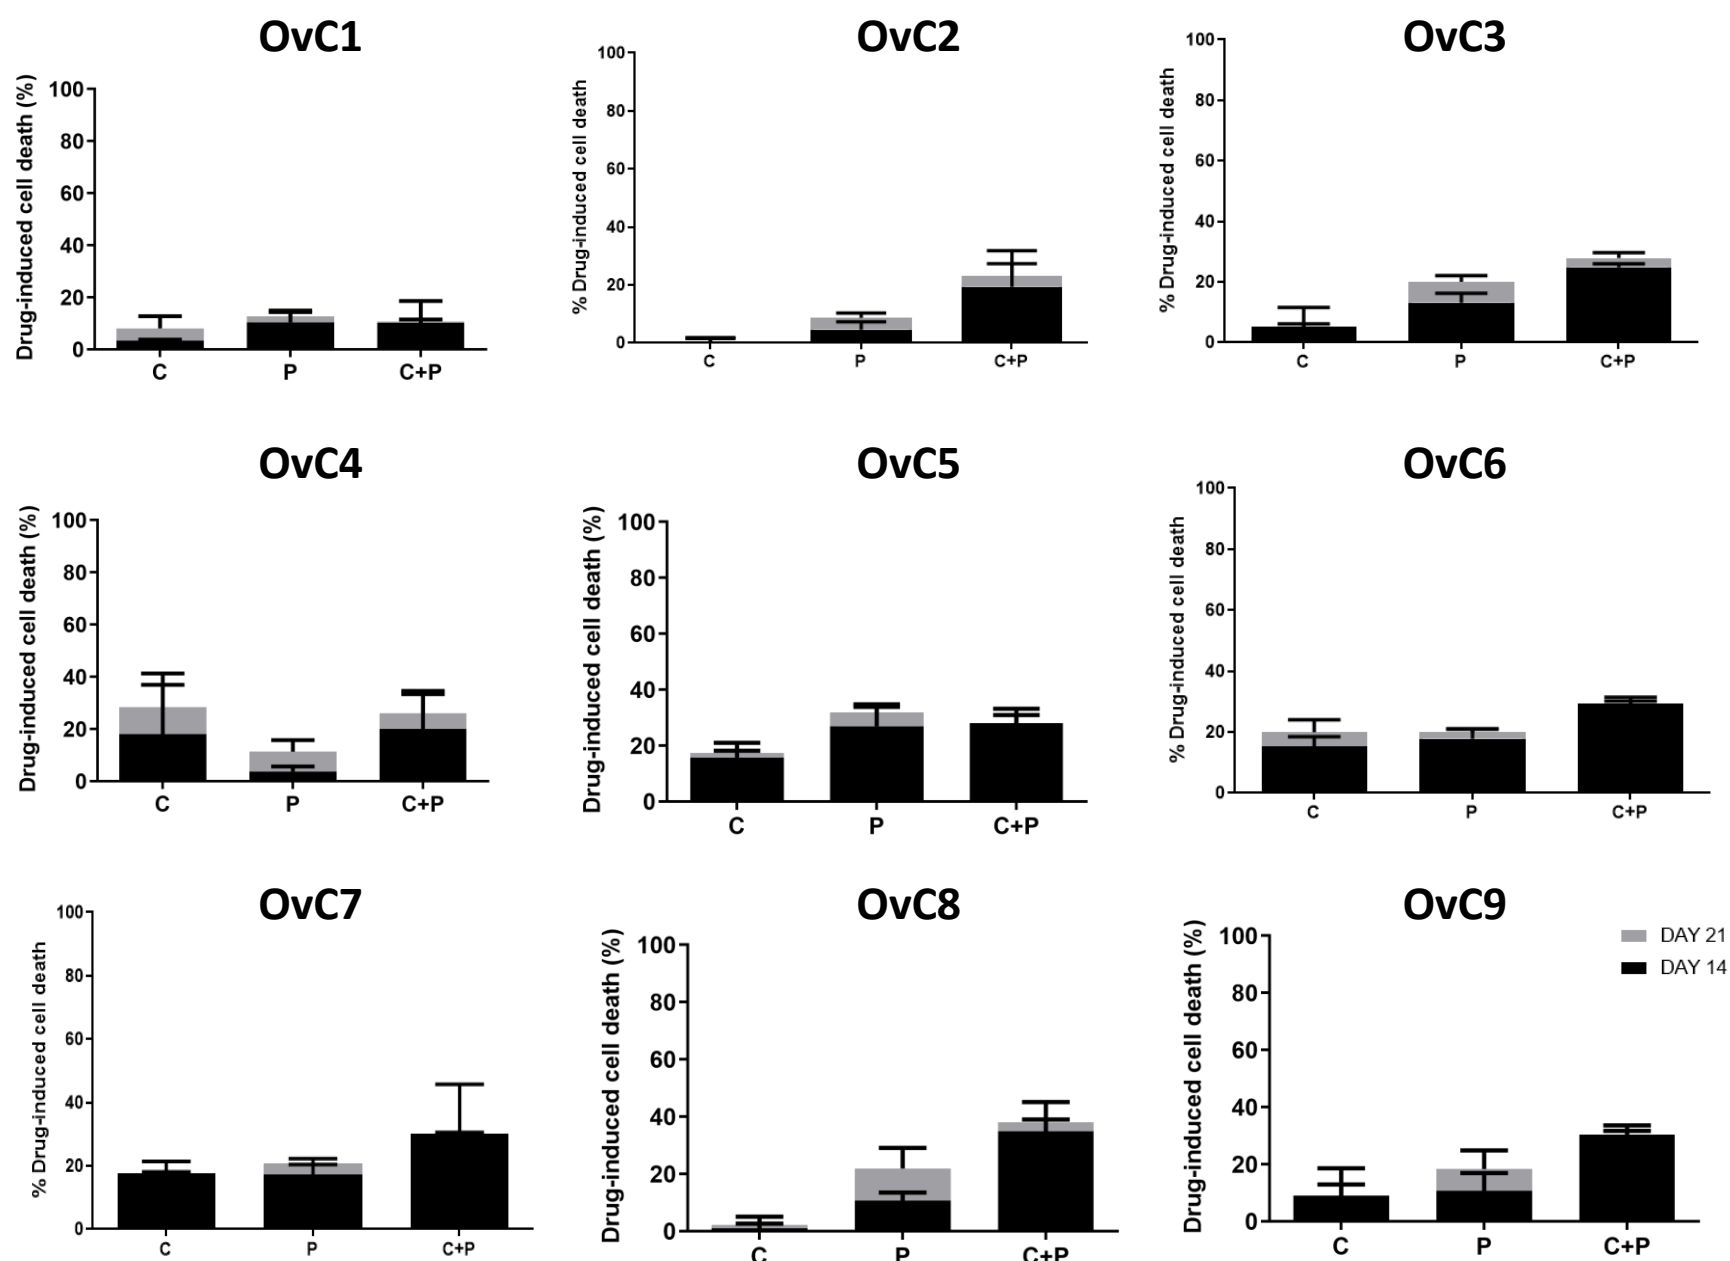**B**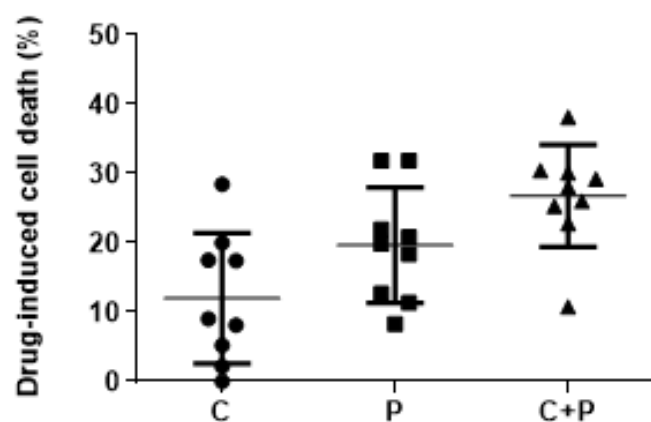**C**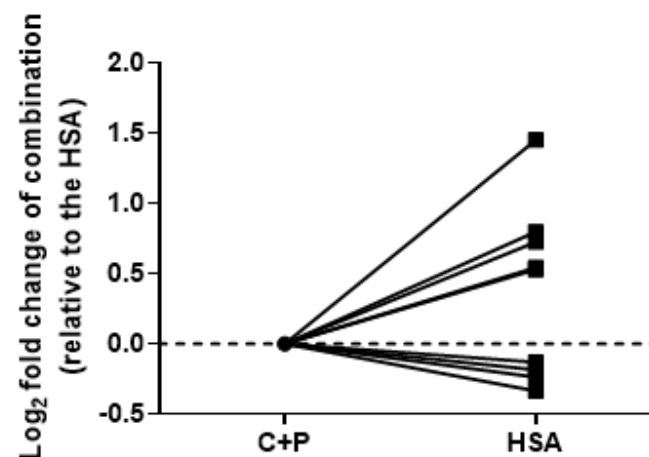

**Supplementary Figure S1: Sample-specific response to combination (C+P) and single drugs cyclic drug exposure in serous OvC patient cohort.** (A) Drug-induced cell death evaluation of OvC-PDE using LDH assay after 2 drug cycles. Data is presented as mean  $\pm$  SD of three technical replicates per OvC-PDE case. (B) Drug-induced cell death of OvC-PDE along two drug cycles, evaluated by the LDH assay. (C) Log<sub>2</sub> fold change of the combination drug-induced cell death relative to the drug-induced cell death of the highest single agent (HSA). (N=9, C: carboplatin, P: paclitaxel; LGSC: low-grade serous carcinoma).

Ai

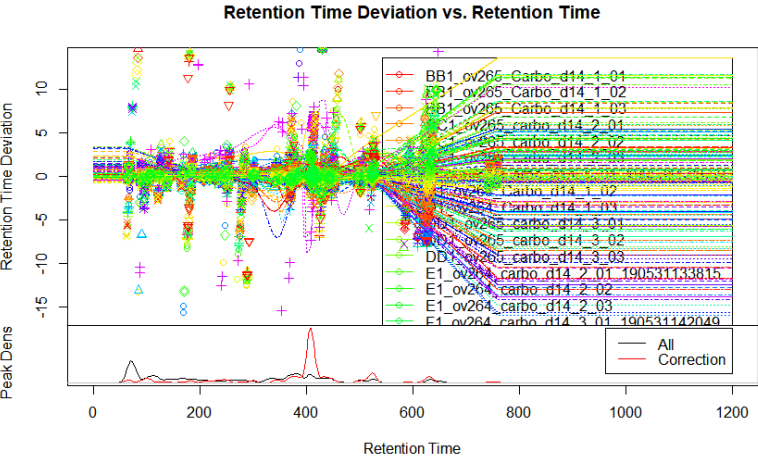

Bi

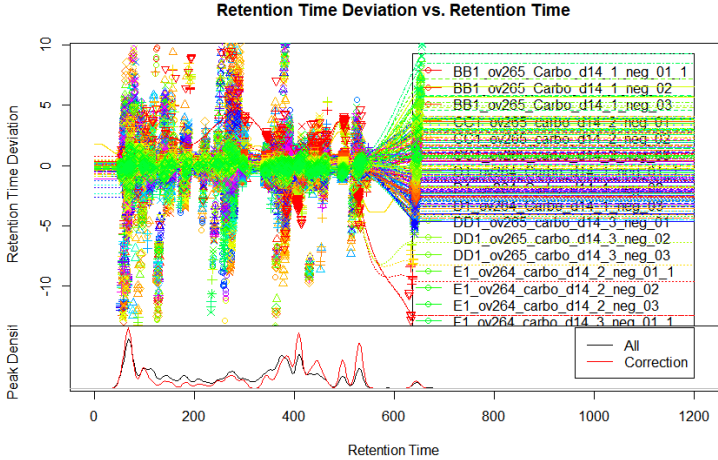

Aii

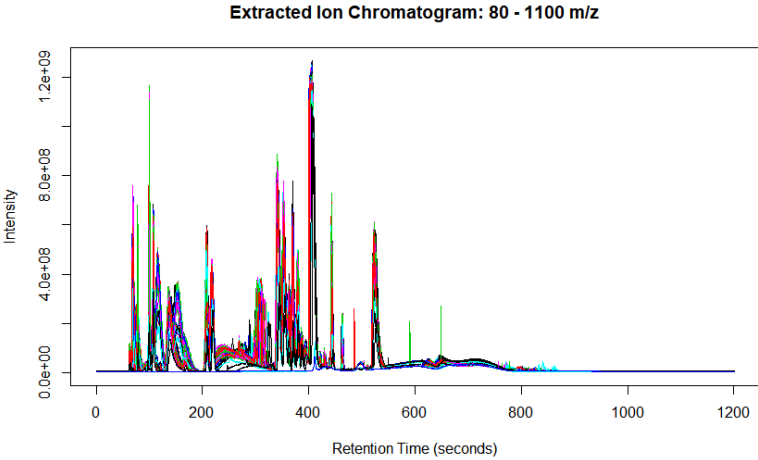

Bii

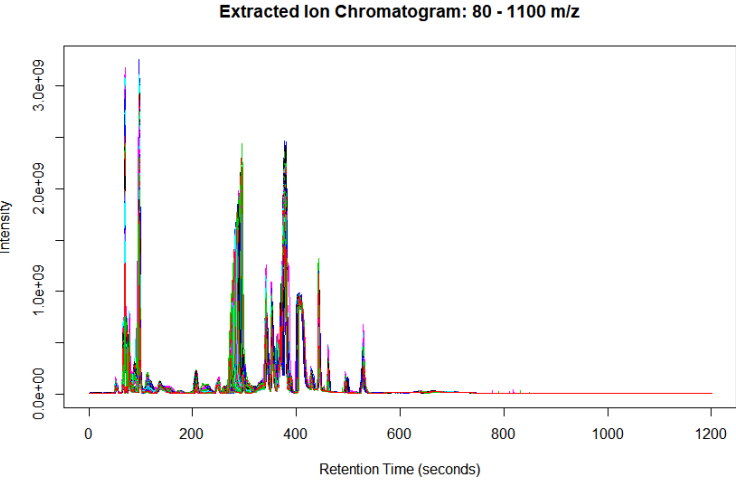

Ci

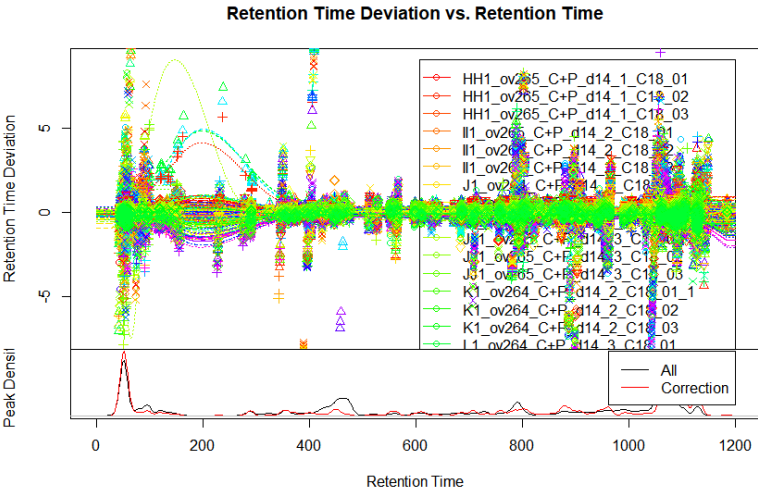

Di

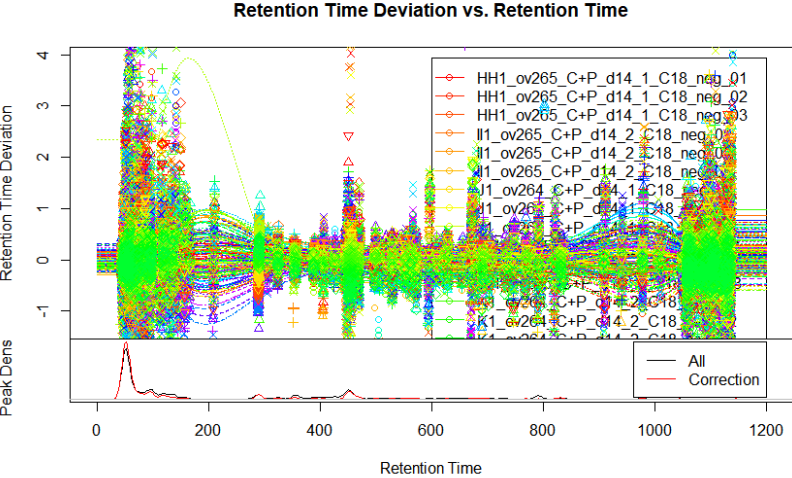

Cii

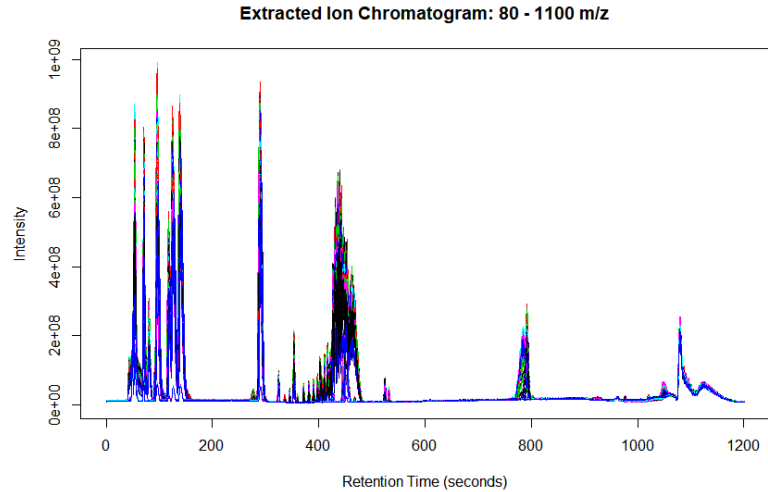

Dii

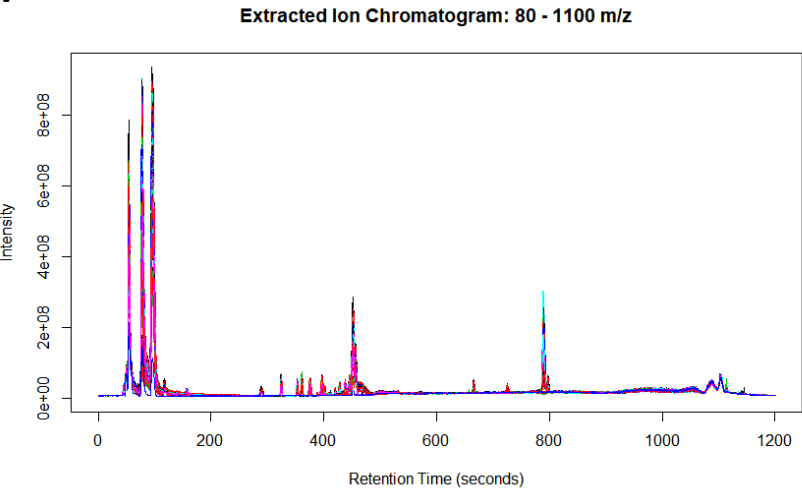

**Supplementary Figure S2: Metabolomics data preprocessing: Peak alignment (i) and extracted ion chromatogram (EIC) (ii) using XCMS software applied in the four untargeted metabolomics datasets. (A) HILIC(+); (B) HILIC(-); (C) RPLC(+); and (D) RPLC(-). (HILIC: hydrophilic interaction liquid chromatography; RPLC: reversed phase liquid chromatography;(+):positive mode; (-):negative mode)**

Ai

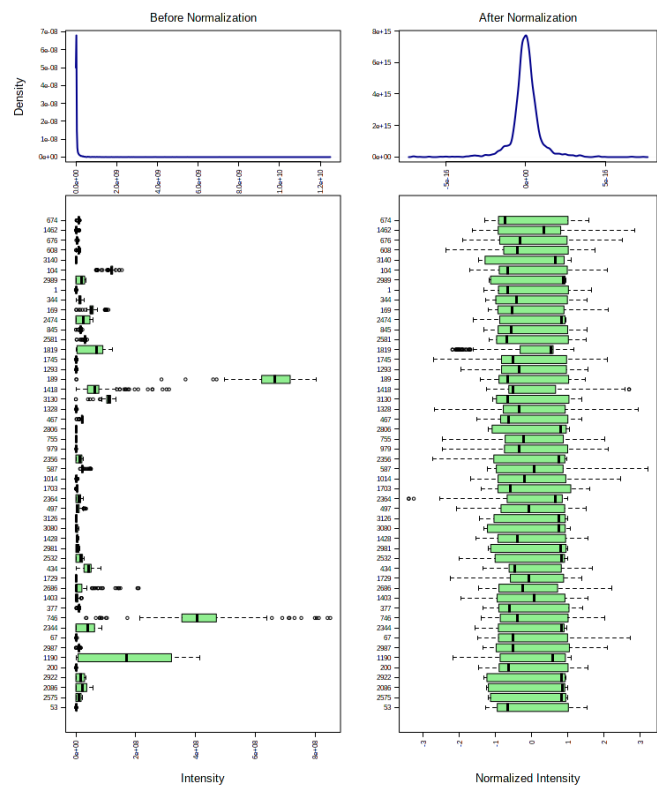

Bi

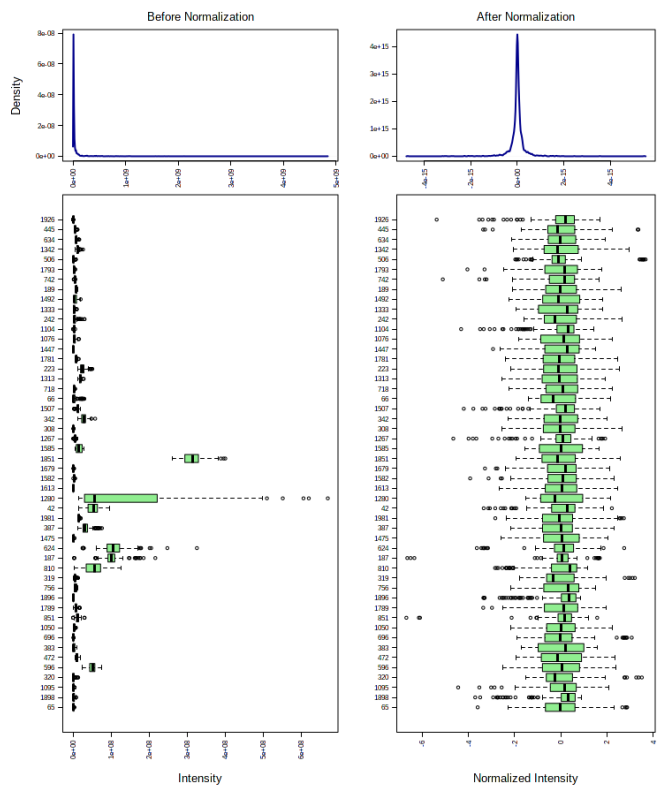

Aii

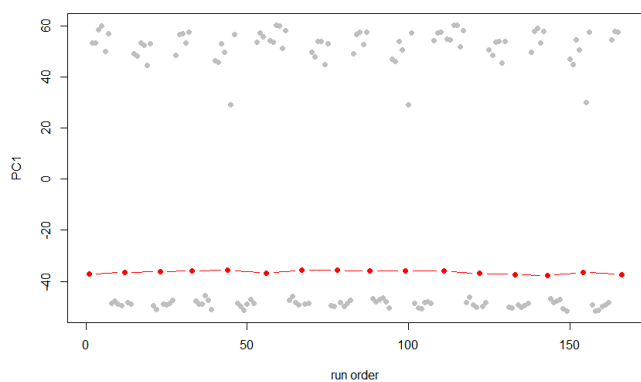

Bii

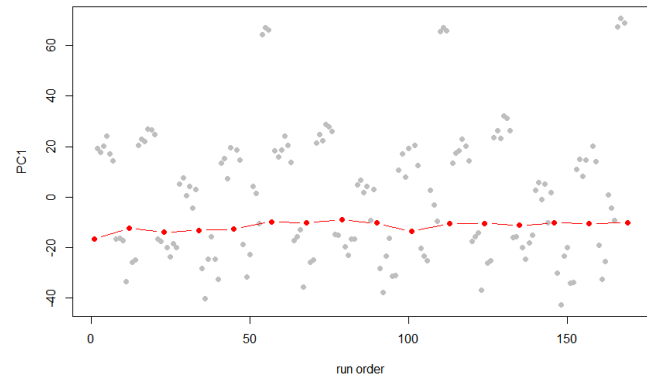

Ci

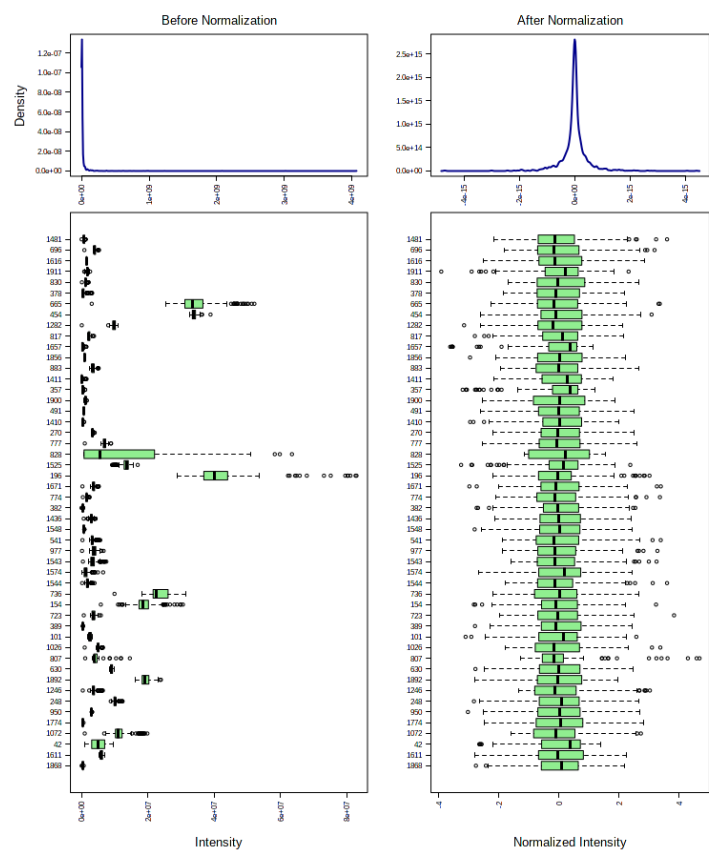

Cii

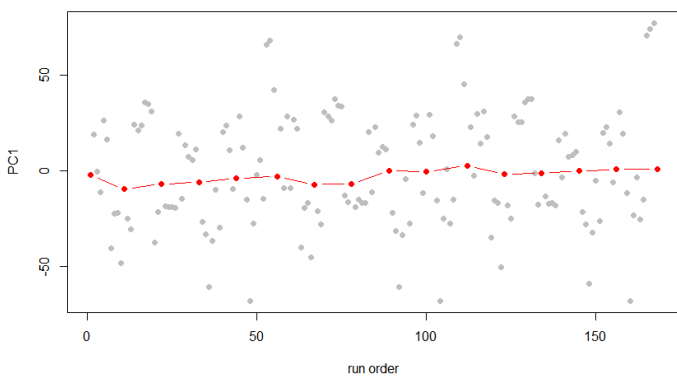

**Supplementary Figure S3: Metabolomics data pretreatment in untargeted metabolomics datasets. (i) Normalization, including scaling and transformation, of peak intensities across features and (ii) stability of QCs over injection run. QCs in red; samples in grey. (A) HILIC(+); (B) HILIC(-); (C) RPLC(+); and (D) RPLC(-). (HILIC: hydrophilic interaction liquid chromatography; RPLC: reversed phase liquid chromatography; (+):positive mode; (-):negative mode, QC: quality control samples).**

Ai

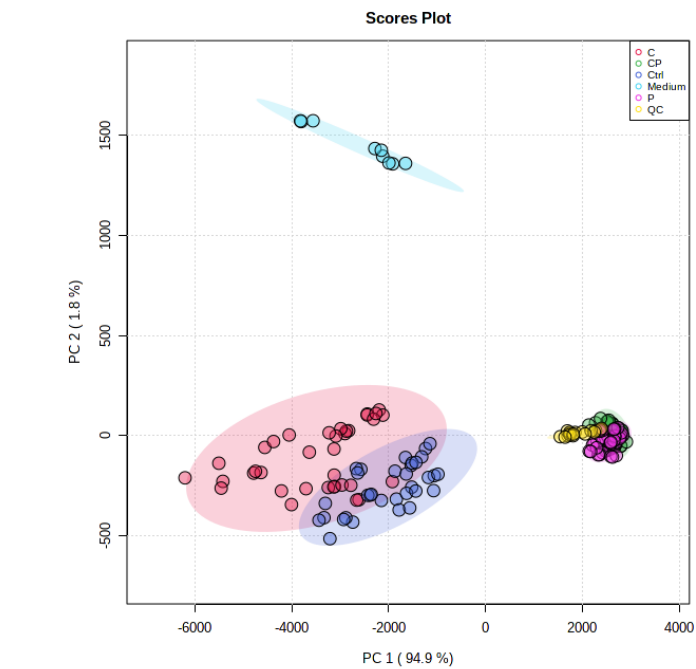

Bi

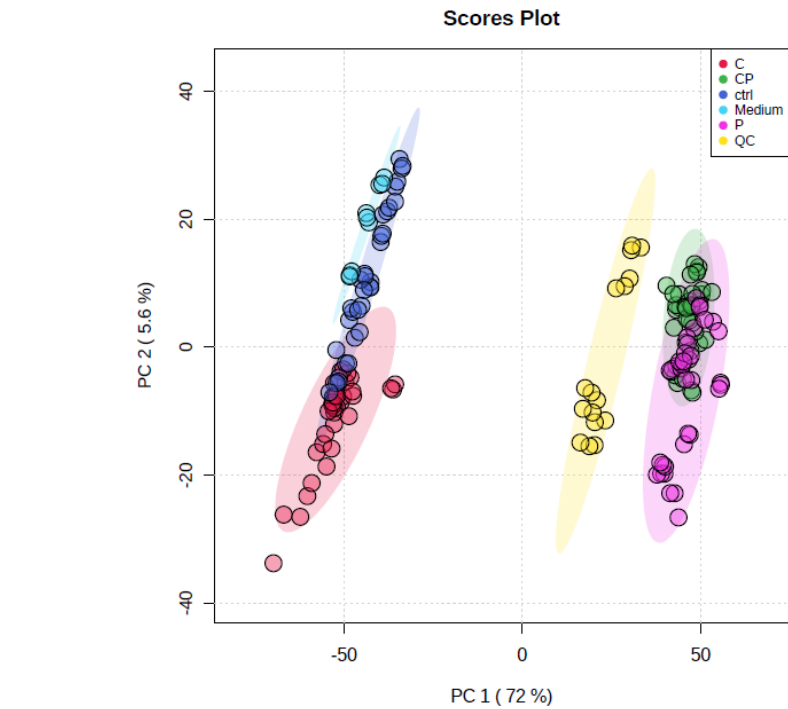

Aii

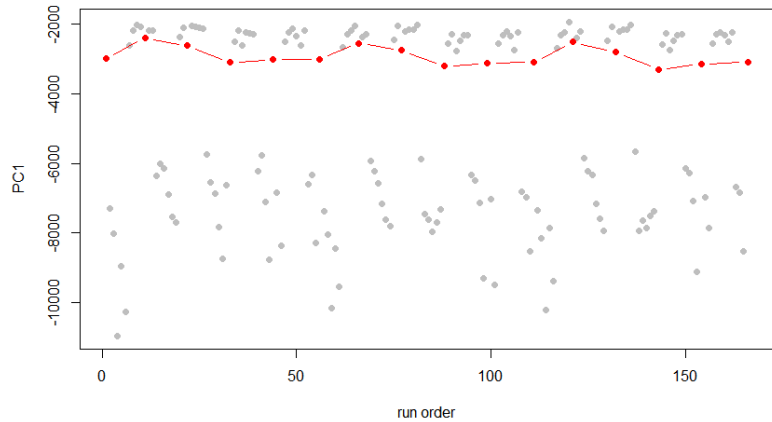

Bii

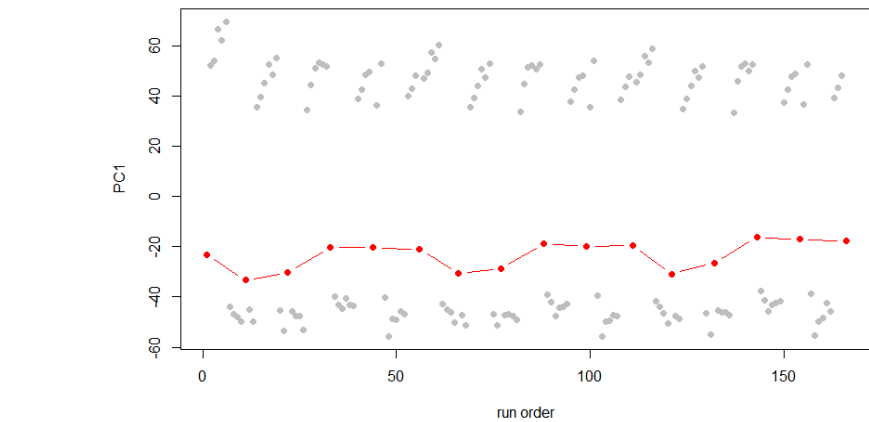

**Supplementary Figure S4: Untargeted metabolic footprints distinct treatment groups of 2 HGSC OvC-PDE samples using RPLC in the positive mode.** Multivariate data analysis performed using **(i)** principal component analysis (PCA) **(A)** when samples were normalized by the median or **(B)** normalized as other columns/modes and **(ii)** stability of QCs over injection run (ii: QCs in red; samples in grey) (C: carboplatin, P: paclitaxel; ctrl: untreated control; Medium: culture media blanks; QC: quality control sample; RPLC: reversed phase liquid chromatography)

Ai

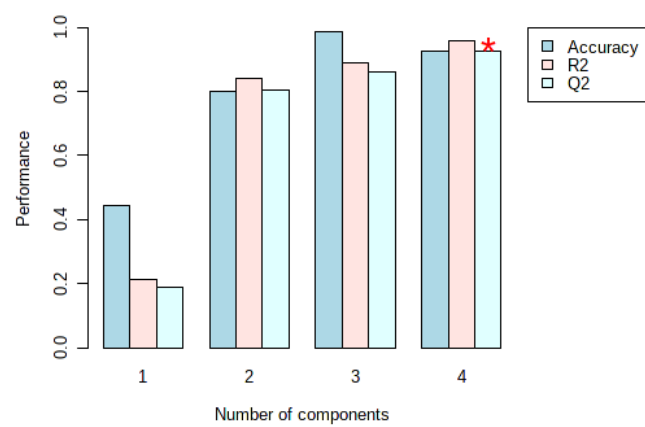

Empirical p value:  $p < 0.01$  (0/100)

Bi

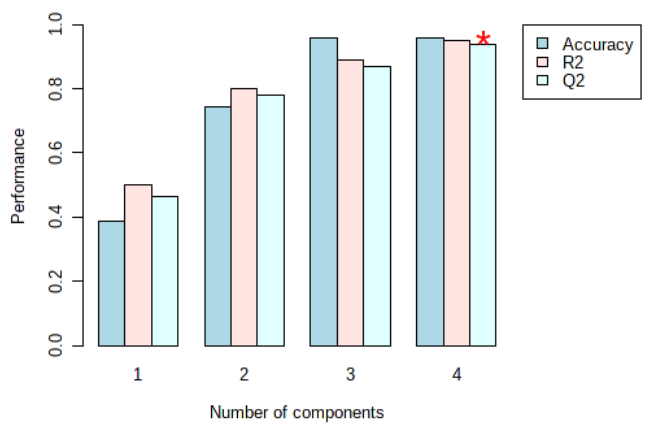

Empirical p value:  $p < 0.01$  (0/100)

Aii

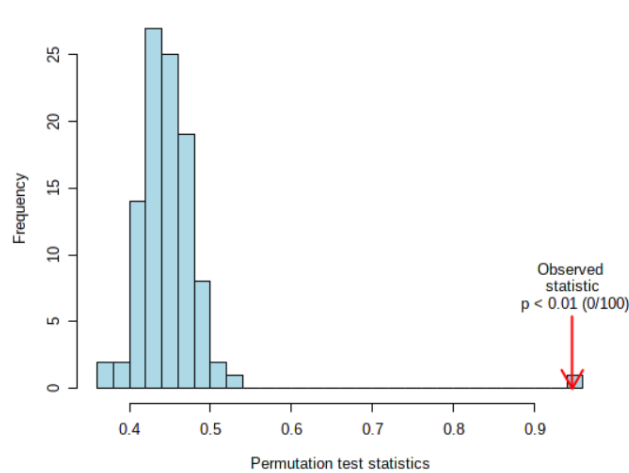

Bii

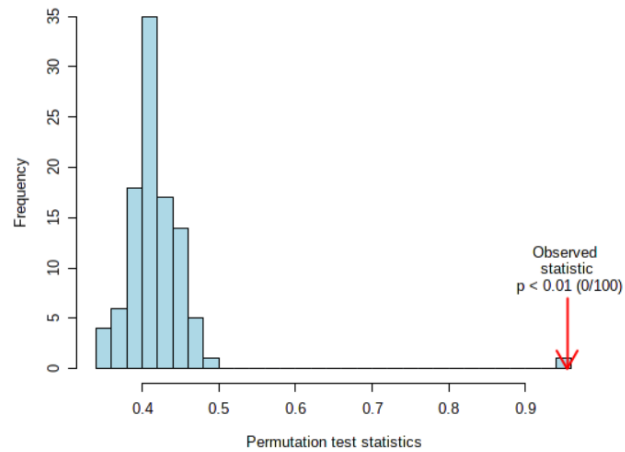

Ci

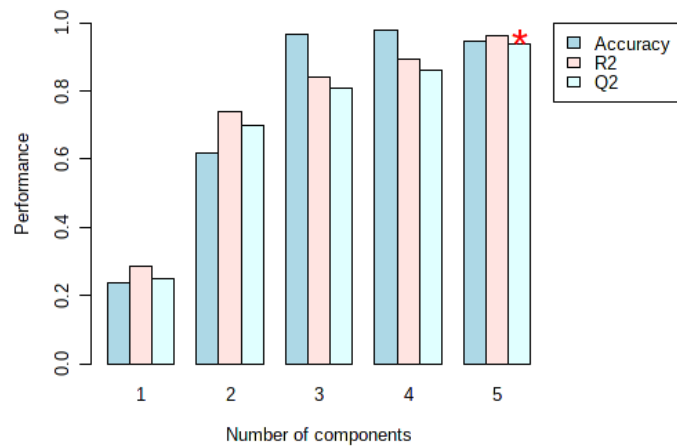

Empirical p value:  $p < 0.01$  (0/100)

Cii

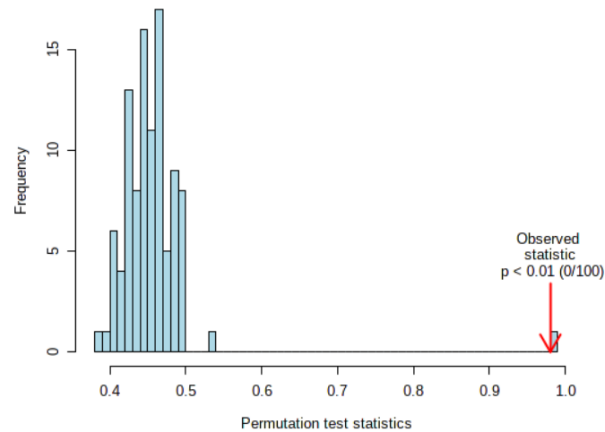

**Supplementary Figure S5: Cross-validation (i) and 100 permutation tests (ii) for PLS-DA classification using (A) HILIC(+); (B) HILIC(-); and (C) RPLC(-) datasets. ((HILIC: hydrophilic interaction liquid chromatography; RPLC: reversed phase liquid chromatography; (+):positive mode; (-):negative mode)**

A

Feature 1597

B

Features 45/193

C

Features 1228/1291/1387/1385

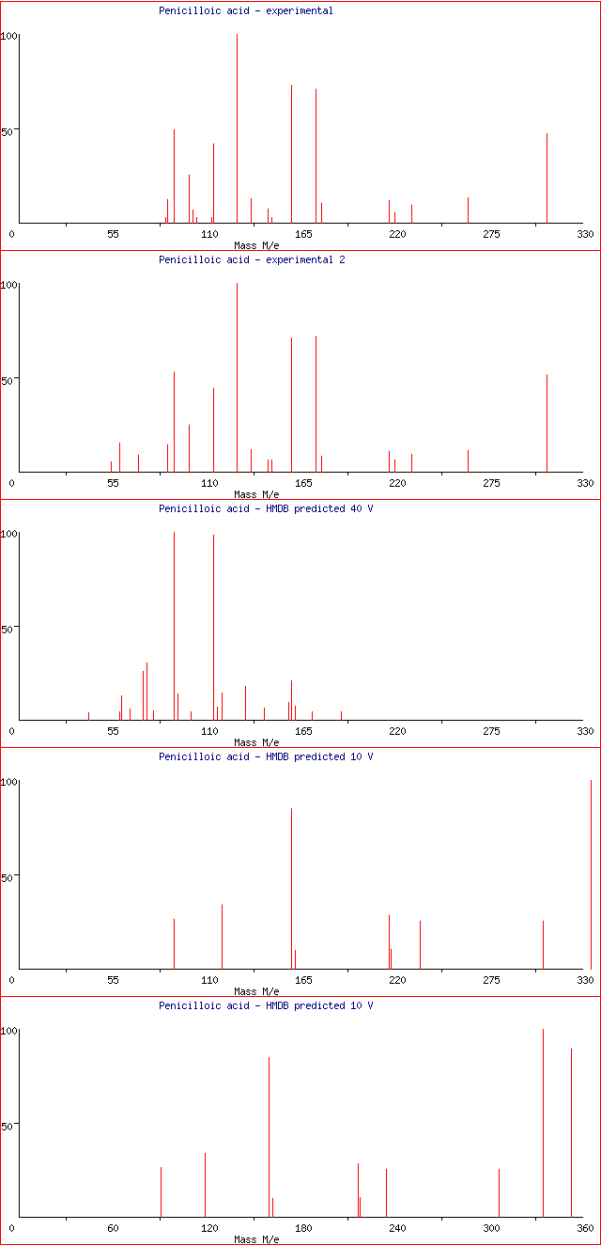

Feature 376

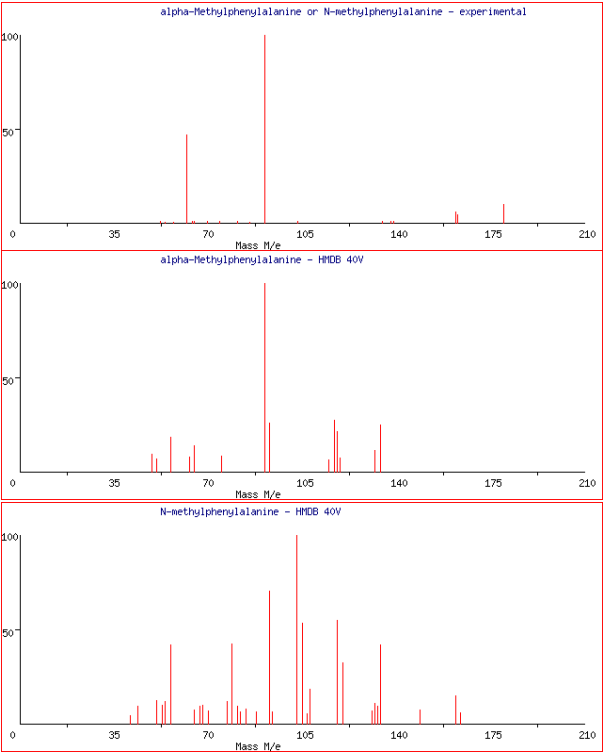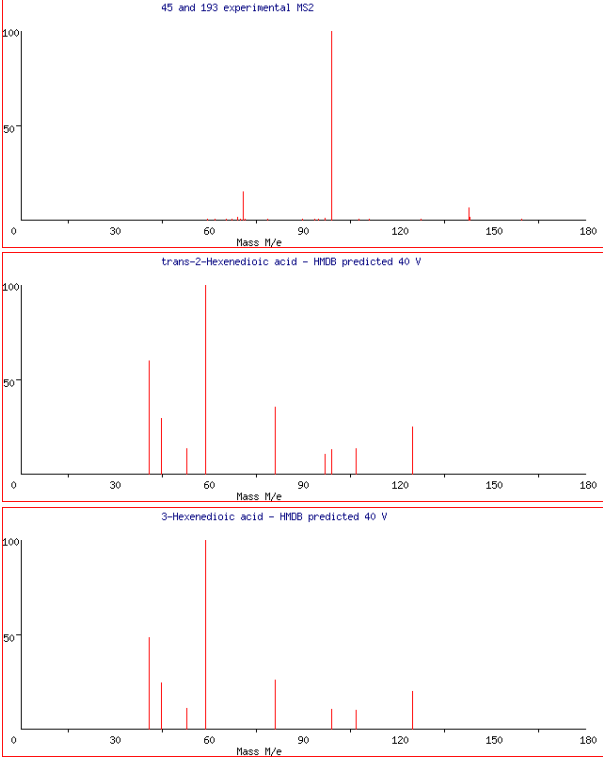

Feature 1496

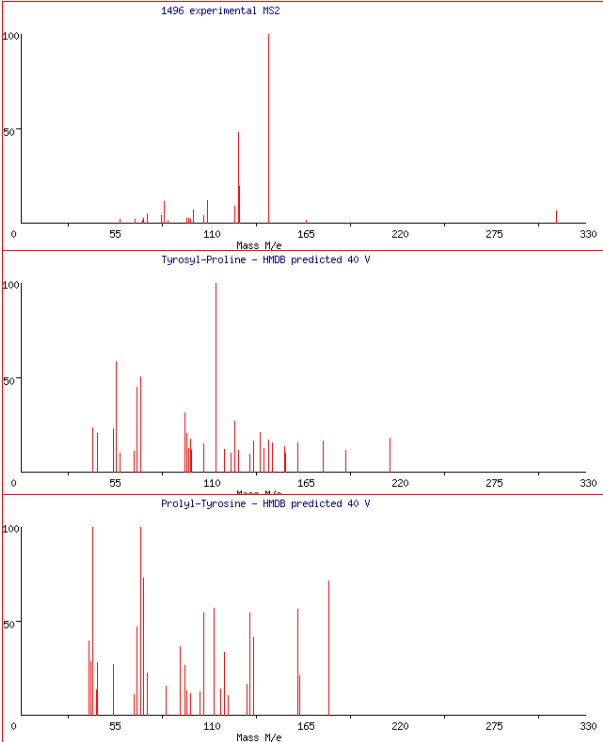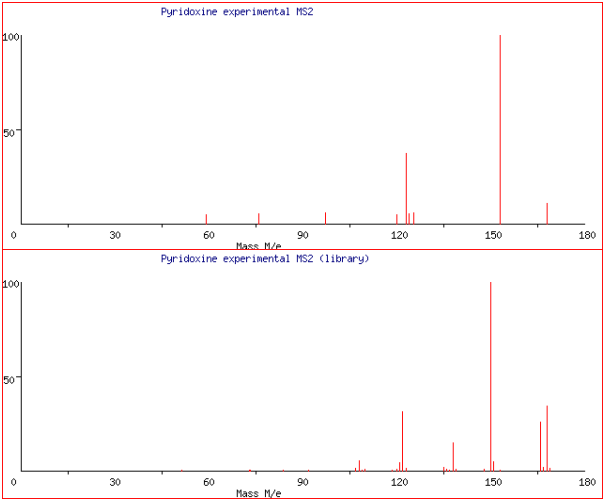

**Supplementary Figure S6: Spectra of top discriminating features uncovered by untargeted metabolomics in datasets (A) HILIC(+), (B) HILIC(-) and (C) RPLC(-).** (upper: experimental MS2 and lower: MS2 spectra from library) (HILIC: hydrophilic interaction liquid chromatography; RPLC: reversed phase liquid chromatography; (+):positive mode; (-):negative mode)

L-Glutamine

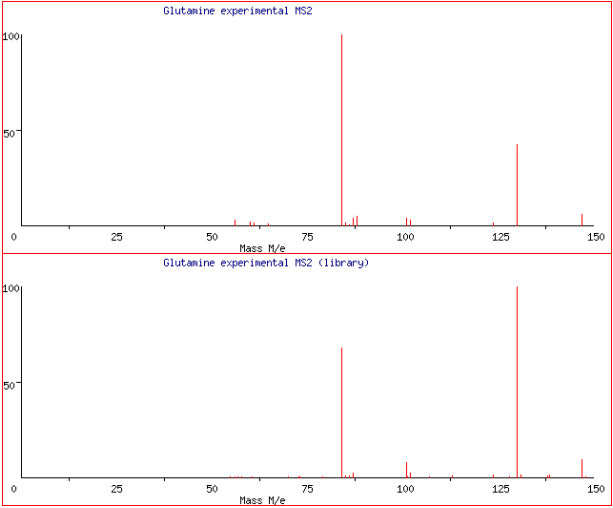

L-Valine

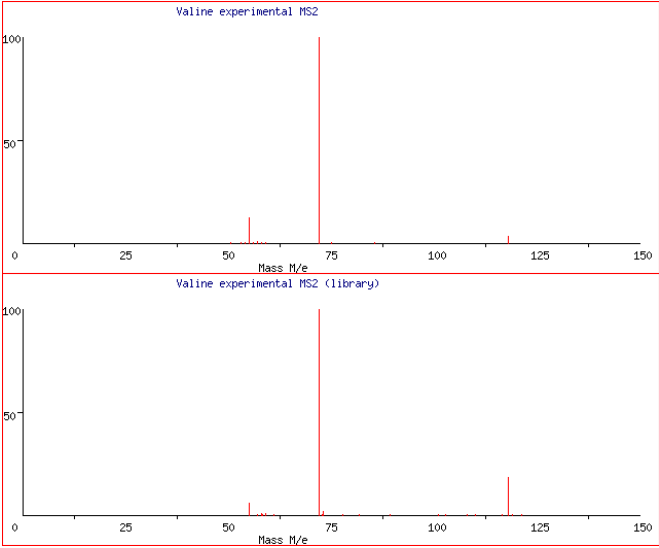

L-Methionine

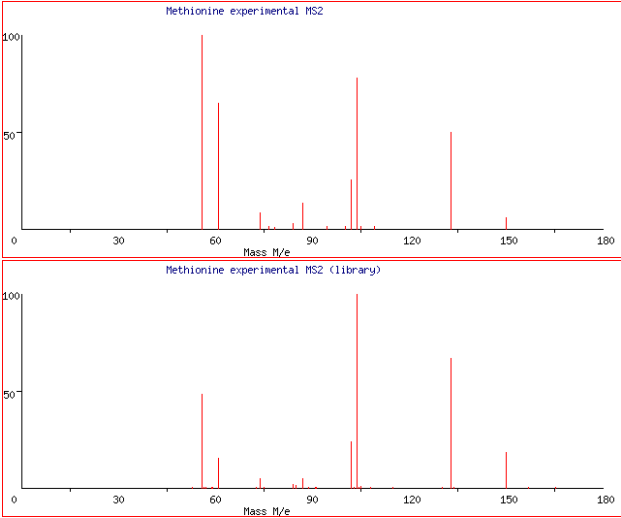

Niacinamide

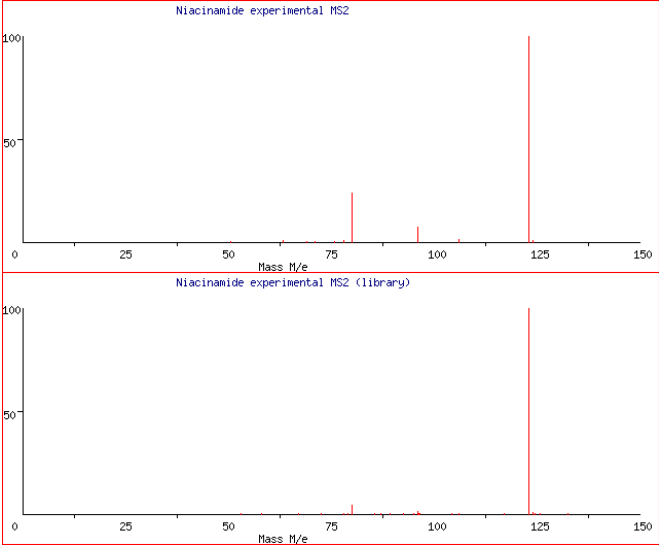

L-Isoleucine/L-Leucine

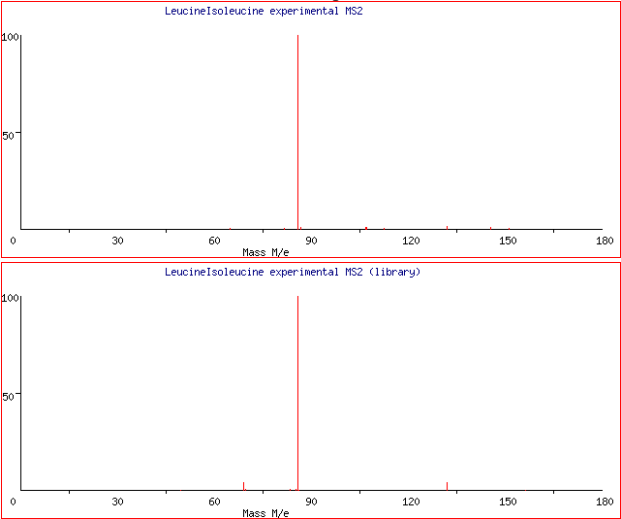

Hexose

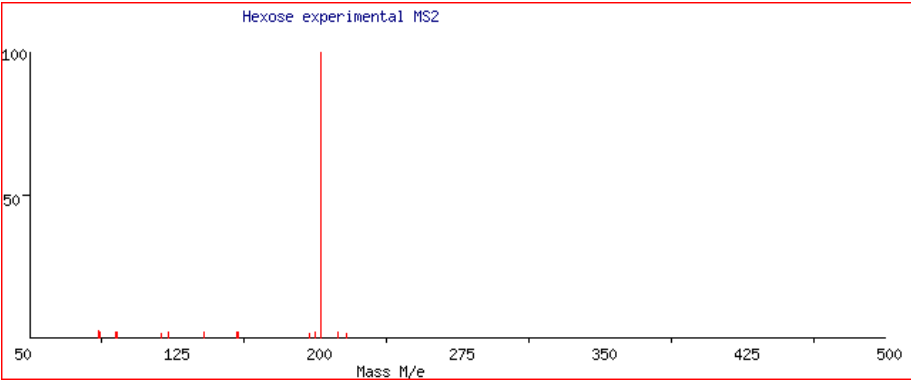

L-Phenylalanine

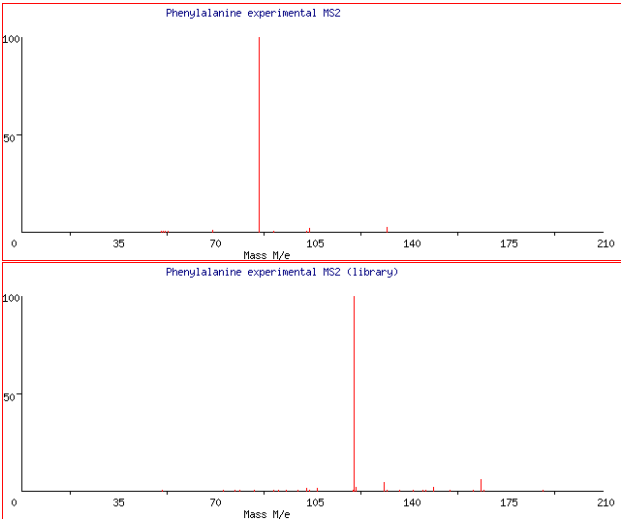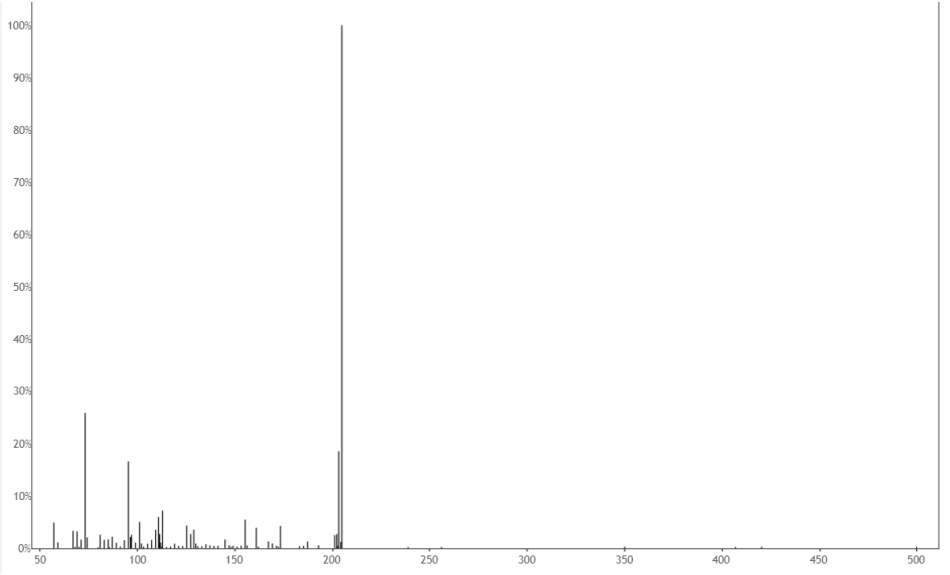

Supplementary Figure S7: Spectra of the metabolites present in the basal medium (DMEM) used to culture OvC-PDE.(upper: experimental MS2 and lower: MS2 spectra from library)



A

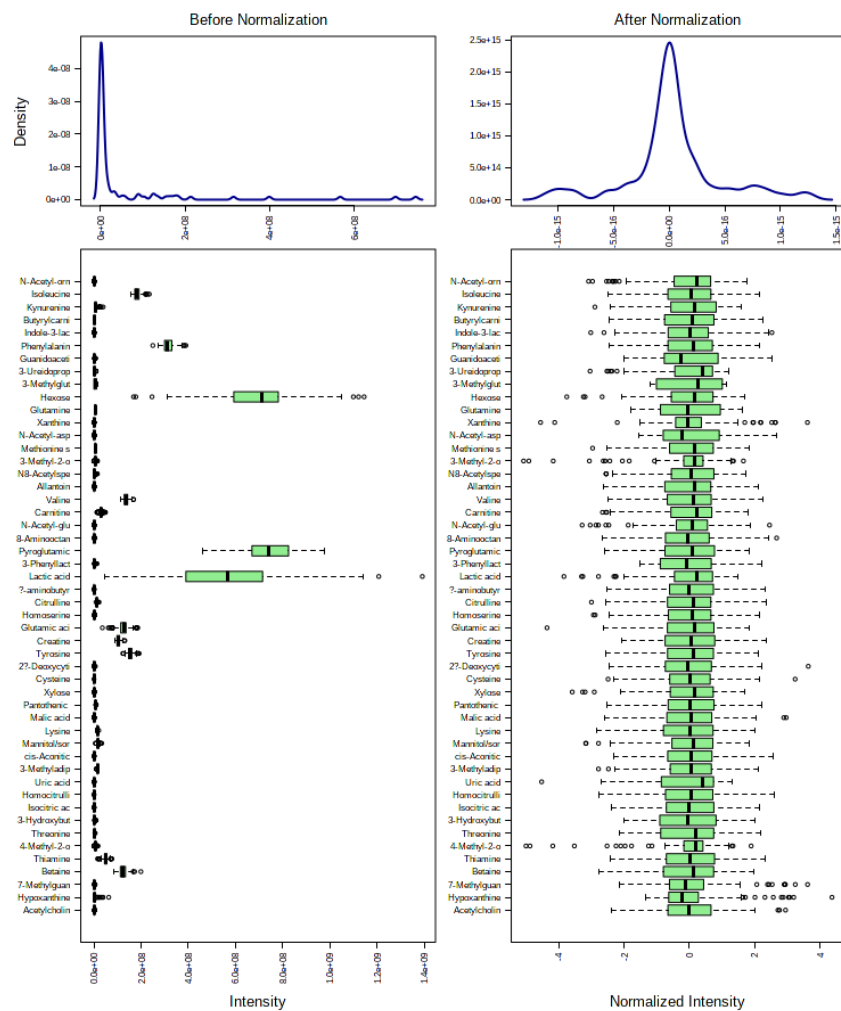

B

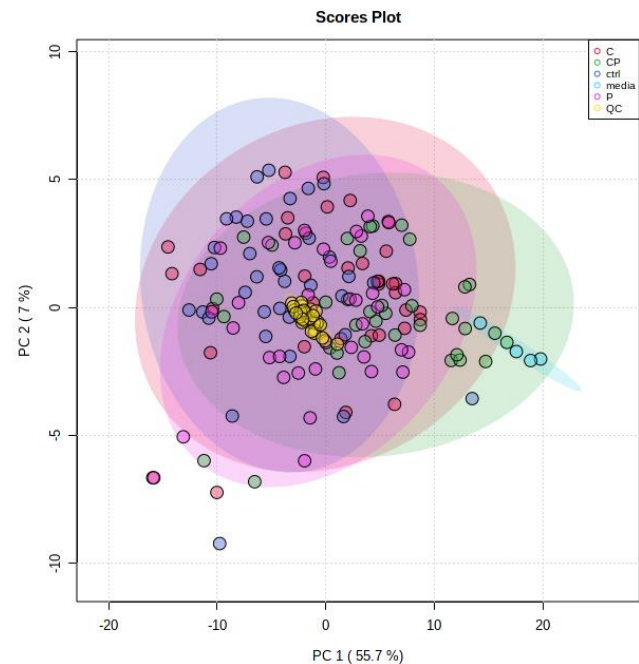

**Supplementary Figure S8: Semi-targeted analysis all samples (OvC1-9).** (A) Normalization, including scaling and transformation, of peak intensities across features. (B) Multivariate data analysis performed using principal component analysis. (the dataset used comprised all samples: untreated controls and treated conditions at day 14 and 21) (C: carboplatin, P: paclitaxel; Ctrl: untreated control; Medium: culture media blanks; QC: quality control sample)

**Ai**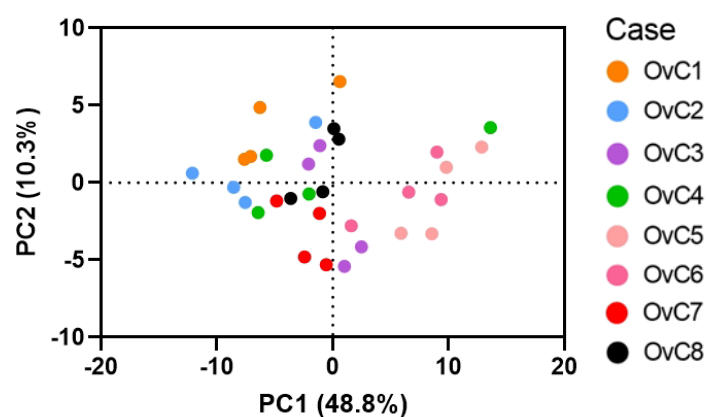**Aii**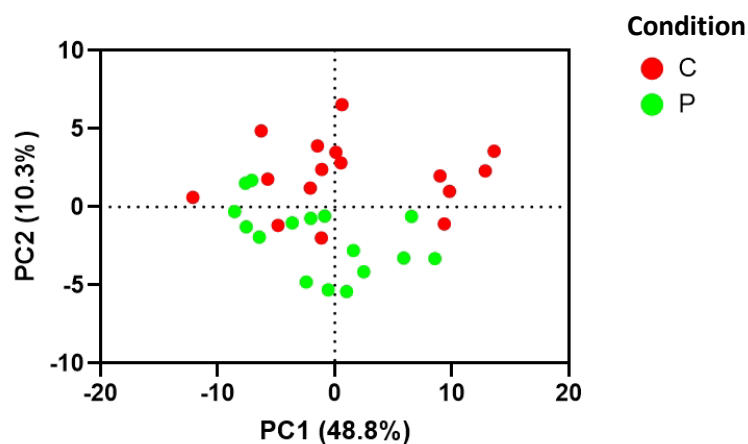**B**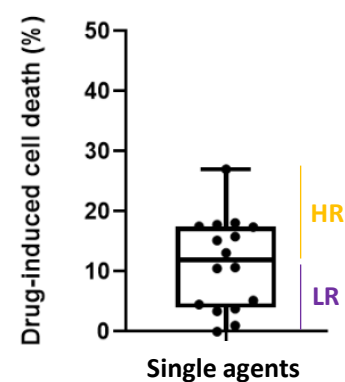**Aiii**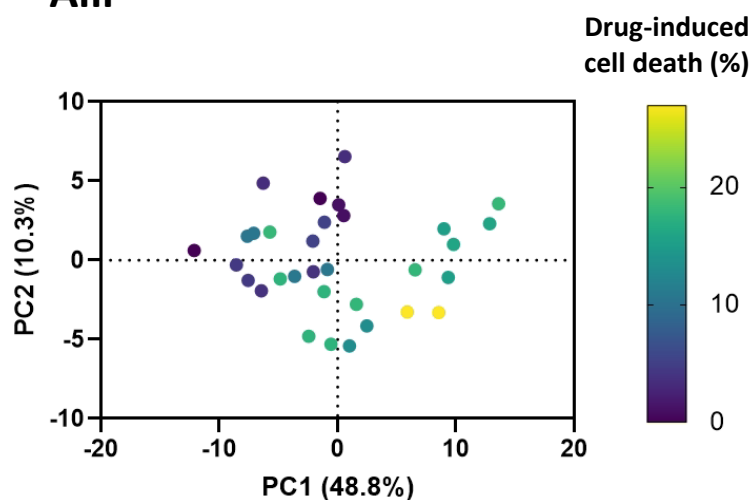**Aiv**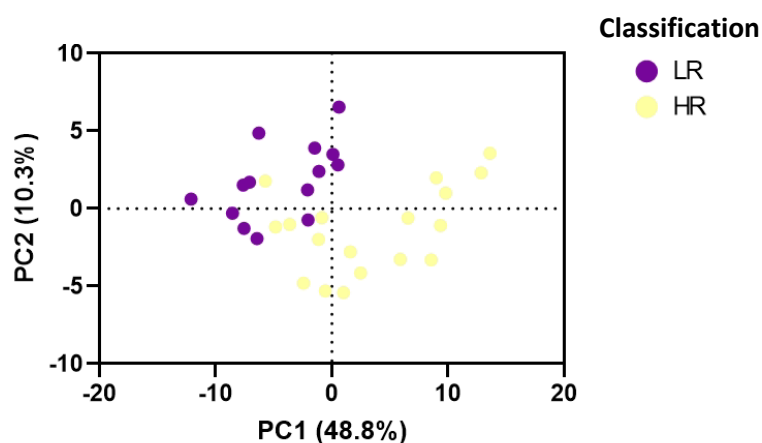

**Supplementary Figure S9: Multivariate data analysis using dataset comprising single-agents treated samples at day 14.** Unsupervised analysis using **(A)** PCA by **(Ai)** OvC-PDE case; **(ii)** single-agent treatment (C vs P); drug response trends by the **(iii)** drug-induced cell death after one drug cycle (day 14) and **(iv)** based on high-responder (HR) and low-responder (LR) classification. **(B)** Cut-off between HR and LR based on the median drug-induced cell death for single drug-treated conditions. (C: carboplatin; P: paclitaxel; HR: high-responder; LR: low-responder; PCA: principal component analysis)

A

PLS-DA

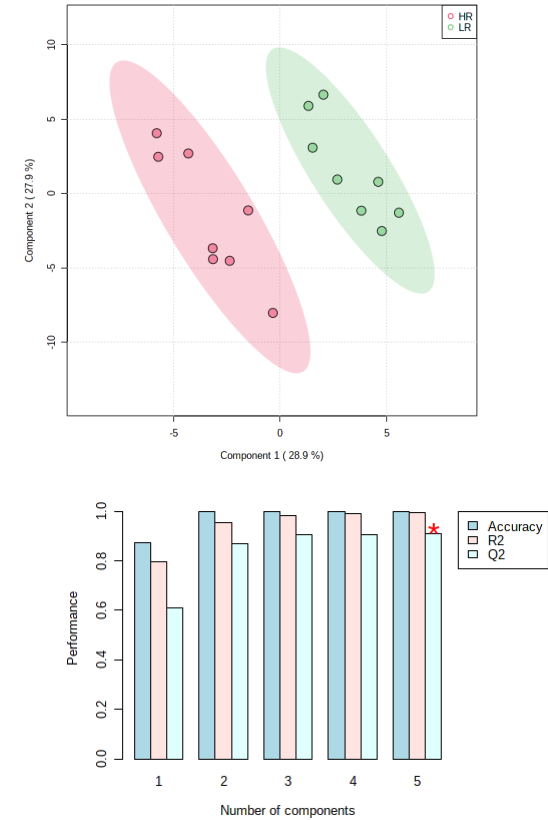

B

sPLS-DA

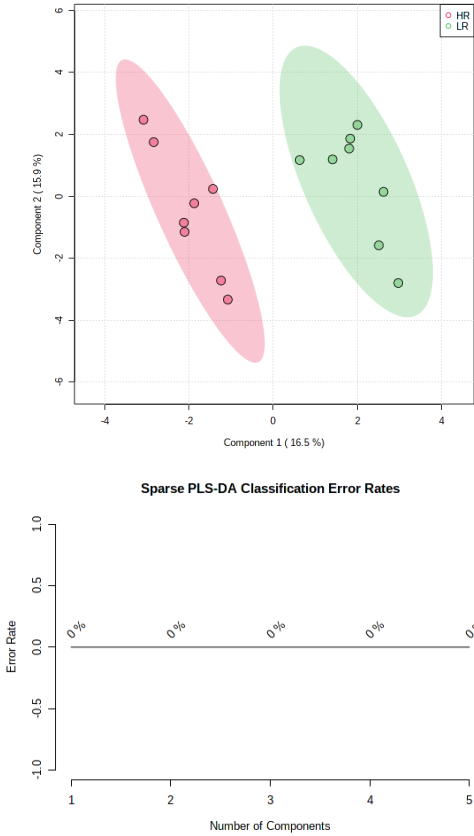

C

RF

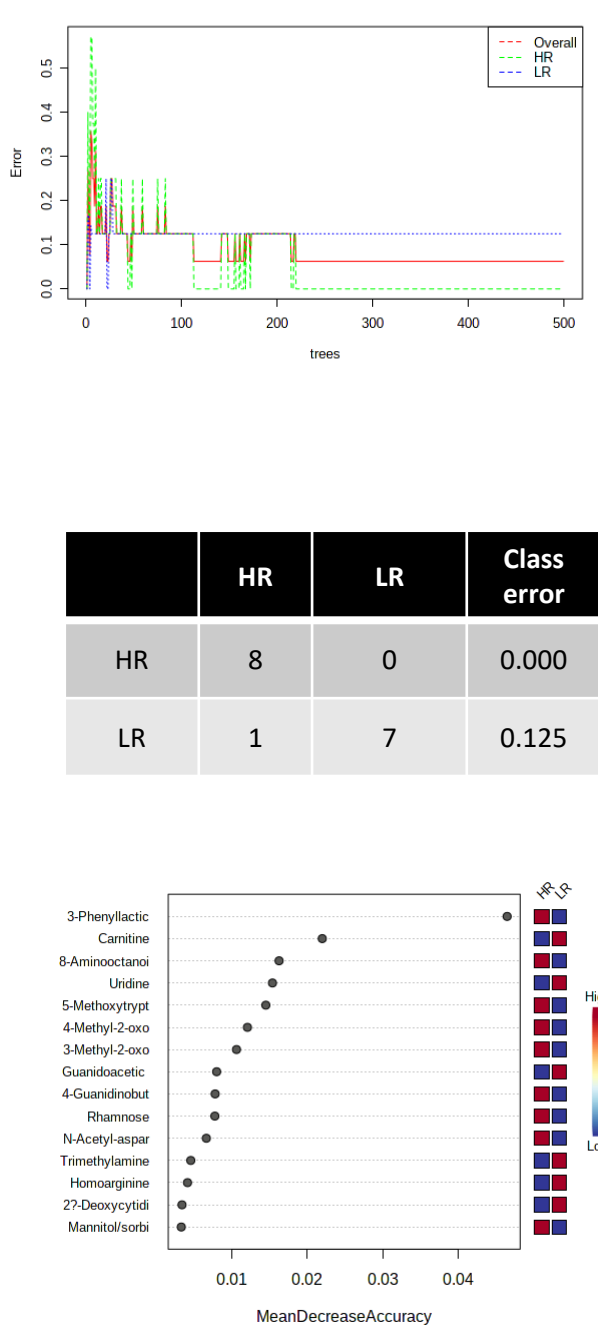

**Supplementary Figure S10: Supervised analysis using dataset comprising untreated control PDE cultures at day 14. (A)** PLS-DA; **(B)** sPLS-DA and **(C)** RF models, with respective plots (upper panel), performance (middle panel) and top discriminating features (lower panel) separating HR vs LR. (HR: high-responder; LR: low-responder; PLS-DA: partial least-squares discriminant analysis; sPLS-DA: sparse partial least-squares discriminant analysis; RF: random forests)

A PCA plot showing the first two principal components. The x-axis is PC1 (53.3%) and the y-axis is PC2 (11.9%). Data points are colored by group: black (top left), pink (left), red (center), purple (top right), blue (bottom right), and orange (bottom right). Dotted lines represent the PC axes.

Case

- OvC1
- OvC2
- OvC3
- OvC4
- OvC5
- OvC6
- OvC7
- OvC8

PC1 (53.3%)

PC2 (11.9%)

Chemotherapy

- Adjuvant
- Neoadjuvant

Drug-Induced cell death (%)

C+P

HR

LR

**PLS-DA**

Component 2 (16.2 %)

Component 1 (49.6 %)

HR  
LR

**sPLS-DA**

Component 1 (35.2 %)

Component 2 (13.2 %)

Legend: HR (yellow), LR (purple)

The plot shows two distinct clusters of data points. The HR group (yellow) is centered around Component 1 = -2.5 and Component 2 = 0. The LR group (purple) is centered around Component 1 = 2.5 and Component 2 = 0. The two groups are well-separated along the x-axis.

The graph, titled "RF", plots Error (y-axis, 0.0 to 1.0) against the number of trees (x-axis, 0 to 500). Three models are compared: Overall (red dashed line), HR (green dashed line), and LR (blue dashed line). All models show a sharp initial drop in error as the number of trees increases from 0 to approximately 20. The Overall model stabilizes at an error rate of about 0.25, with a slight step-down to 0.15 at 270 trees and another to 0.12 at 460 trees. The HR model stabilizes at a higher error rate of approximately 0.38. The LR model stabilizes at the lowest error rate of about 0.12, with a step-down to 0.08 at 270 trees and another to 0.05 at 460 trees.

| trees | Overall | HR   | LR   |
|-------|---------|------|------|
| 0     | 1.0     | 1.0  | 1.0  |
| 20    | 0.35    | 0.38 | 0.25 |
| 50    | 0.25    | 0.38 | 0.12 |
| 100   | 0.25    | 0.38 | 0.12 |
| 270   | 0.25    | 0.38 | 0.12 |
| 270   | 0.30    | 0.38 | 0.08 |
| 460   | 0.25    | 0.38 | 0.08 |
| 460   | 0.30    | 0.38 | 0.05 |
| 500   | 0.30    | 0.38 | 0.05 |

**RF**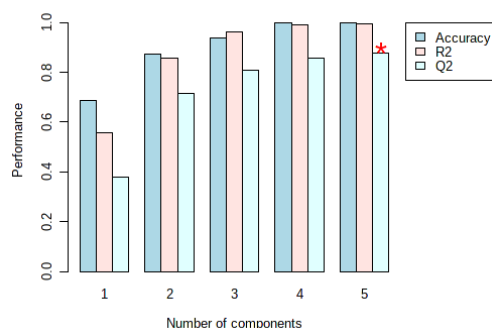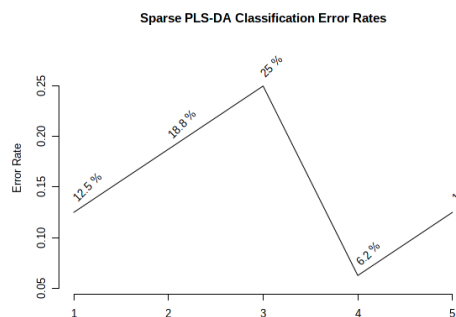

|    | HR | LR | Class error |
|----|----|----|-------------|
| HR | 5  | 3  | 0.38        |
| LR | 2  | 6  | 0.25        |

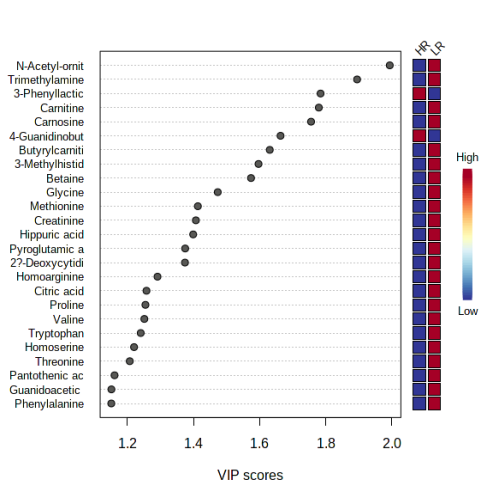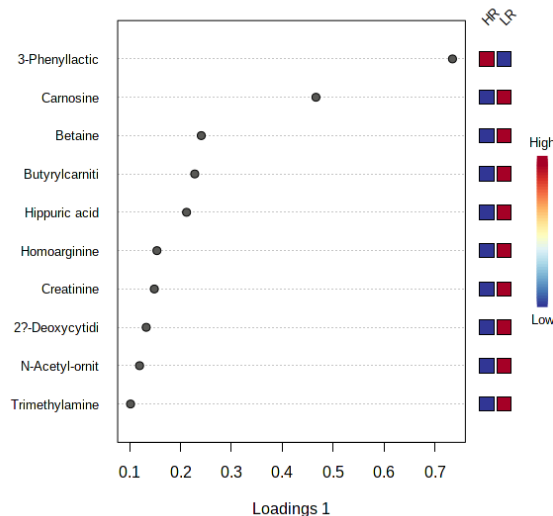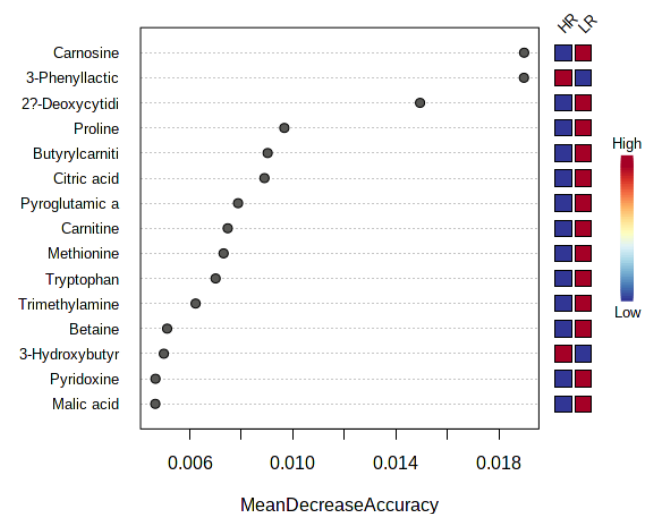

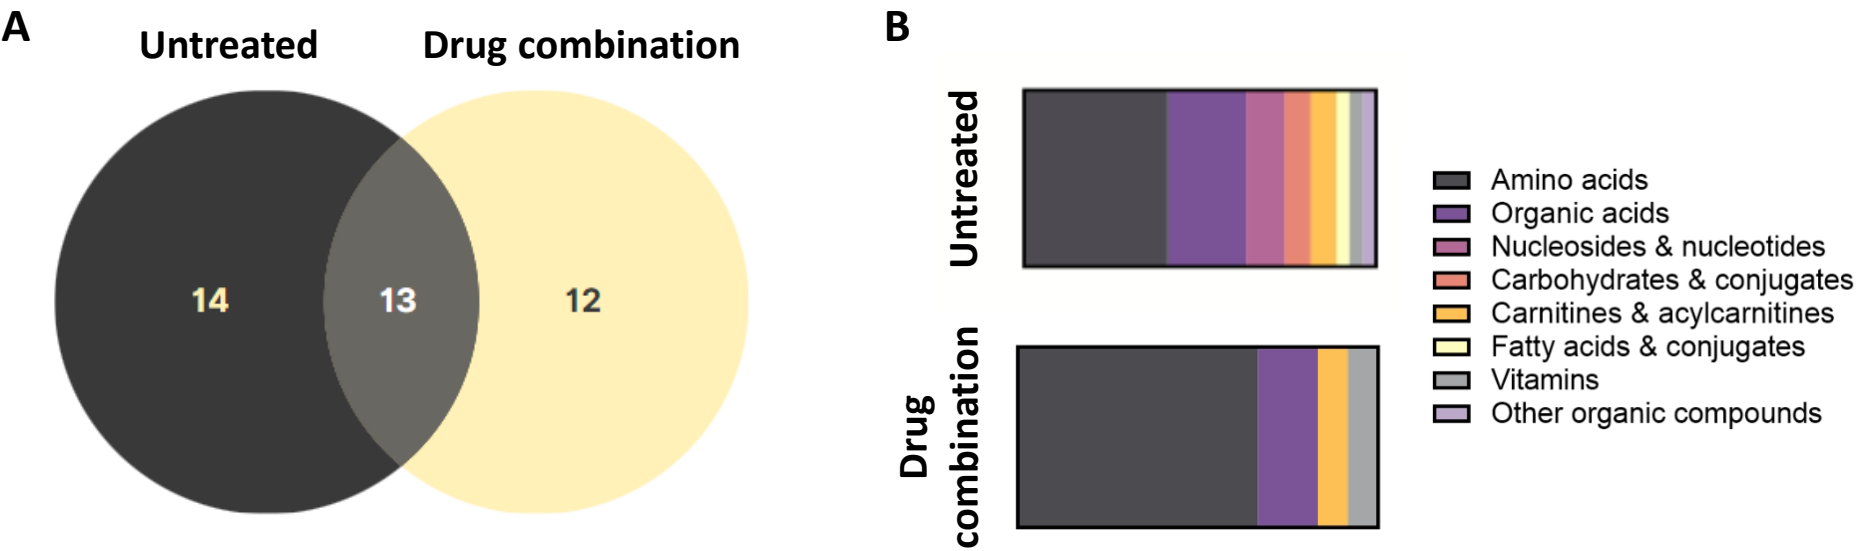

**Supplementary Figure S12: Untreated and drug combination challenged PDE cultures metabolic traits determine ex vivo drug response. (A)** Top discriminating metabolic features for drug response (high-responders, HR versus low-responders, LR) in untreated and combination-treated PDE datasets and **(B)** respective metabolite classes.

Ai

ROC

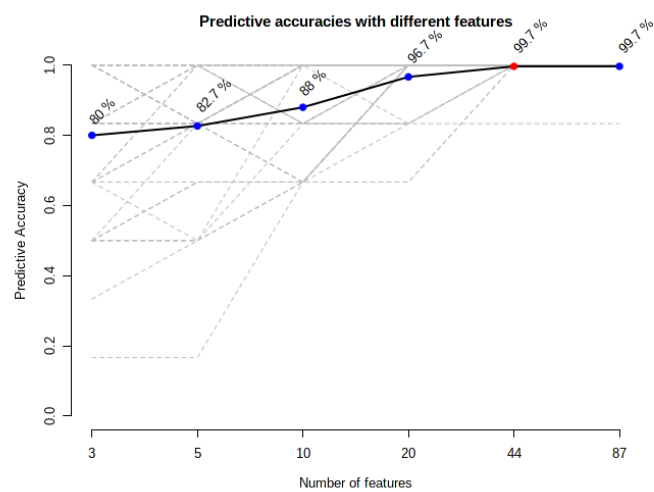

Aii

Model 3 – 10 features

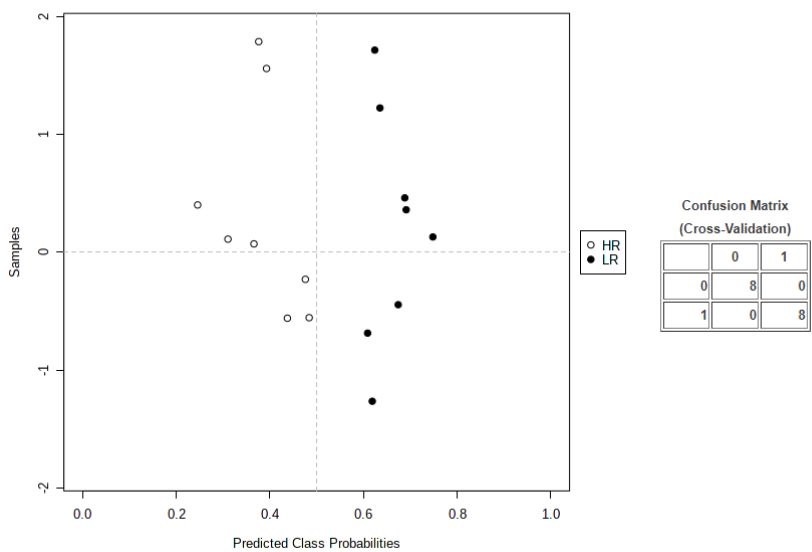

Bi

ROC

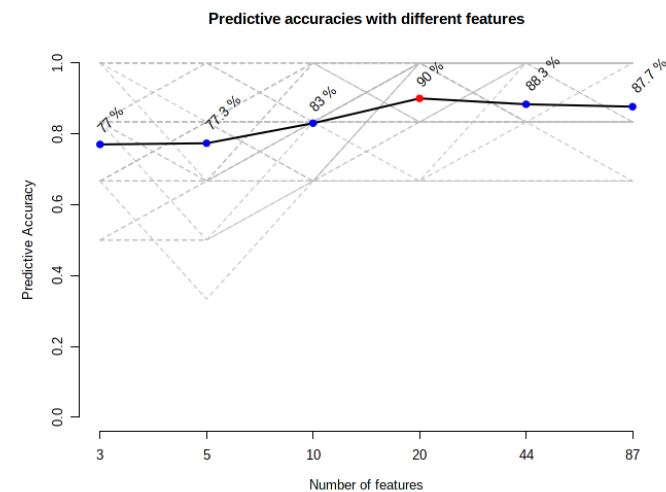

Bii

Model 4 – 20 features

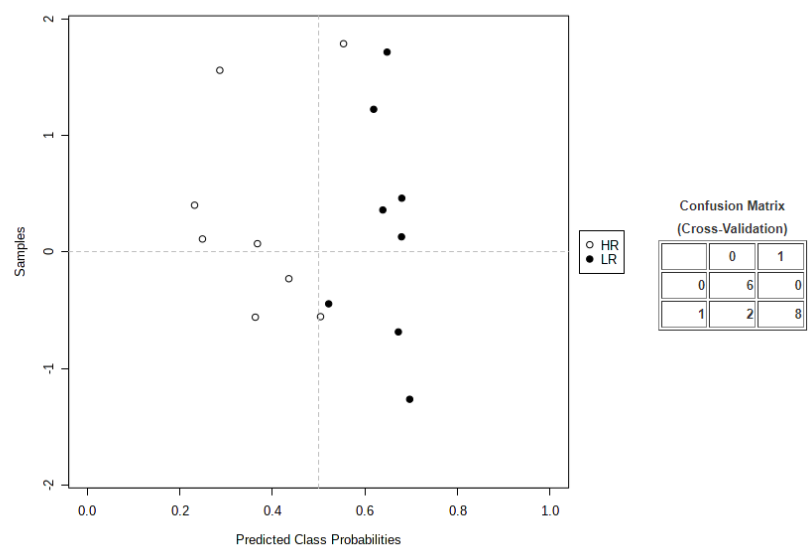

**Supplementary Figure S13: PLS-DA ROC curve analysis using dataset comprising (A) untreated control PDE cultures and (B) combination (C+P) treated samples at day 14. (i) Accuracy using different number of features. (ii) No class error was observed for a model based on (Aii) 10 features (or more features) or (Bii) 20 features (optimal accuracy - red dot. (C: carboplatin; P: paclitaxel; HR: high-responder; LR: low-responder; PLS-DA: partial least-squares discriminant analysis; ROC: receiver operating curve)**
