# Supplementary material for: Exploring Metabolic Signatures of Ex Vivo Tumor Tissue Cultures for Prediction of Chemosensitivity in Ovarian Cancer
Source: Cancers (Basel). 2022 Sep 14;14(18):4460. doi: 10.3390/cancers14184460 (PMC9496731; doi:10.3390/cancers14184460)
Supplement: Supplementary file 1 [file cancers-14-04460-s001.zip]

Archive with 4 entries (4 files):
- Supplementary File S1_SI figures.pdf
- Supplementary File S2.xlsx
- Supplementary File S3.xlsx
- Supplementary File S4.xlsx
