# Supplementary material for: Exploring Metabolic Signatures of Ex Vivo Tumor Tissue Cultures for Prediction of Chemosensitivity in Ovarian Cancer
Source: Cancers (Basel). 2022 Sep 14;14(18):4460. doi: 10.3390/cancers14184460 (PMC9496731; doi:10.3390/cancers14184460)
Supplement: Supplementary file 1 [file cancers-14-04460-s001.zip › Supplementary File S2.xlsx]

## Sheet: sample metadata
Original legend	Sample	Treatment	Day	Replicate
D1_ov264_Carbo_d14_1_neg_01_1	OvC8	C	14	I
D1_ov264_Carbo_d14_1_neg_02	OvC8	C	14	II
D1_ov264_Carbo_d14_1_neg_03	OvC8	C	14	III
E1_ov264_carbo_d14_2_neg_01_1	OvC8	C	14	I
E1_ov264_carbo_d14_2_neg_02	OvC8	C	14	II
E1_ov264_carbo_d14_2_neg_03	OvC8	C	14	III
F1_ov264_carbo_d14_3_neg_01_1	OvC8	C	14	I
F1_ov264_carbo_d14_3_neg_02	OvC8	C	14	II
F1_ov264_carbo_d14_3_neg_03	OvC8	C	14	III
P1_ov264_Carbo_d21_1_neg_01_1	OvC8	C	21	I
P1_ov264_Carbo_d21_1_neg_02	OvC8	C	21	II
P1_ov264_Carbo_d21_1_neg_03	OvC8	C	21	III
Q1_ov264_carbo_d21_2_neg_01_1	OvC8	C	21	I
Q1_ov264_carbo_d21_2_neg_02	OvC8	C	21	II
Q1_ov264_carbo_d21_2_neg_03	OvC8	C	21	III
R1_ov264_carbo_d21_3_neg_01_1	OvC8	C	21	I
R1_ov264_carbo_d21_3_neg_02	OvC8	C	21	II
R1_ov264_carbo_d21_3_neg_03	OvC8	C	21	III
J1_ov264_C.P_d14_1_neg_01_1	OvC8	CP	14	I
J1_ov264_C.P_d14_1_neg_02	OvC8	CP	14	II
J1_ov264_C.P_d14_1_neg_03	OvC8	CP	14	III
K1_ov264_C.P_d14_2_neg_01_1	OvC8	CP	14	I
K1_ov264_C.P_d14_2_neg_02	OvC8	CP	14	II
K1_ov264_C.P_d14_2_neg_03	OvC8	CP	14	III
L1_ov264_C.P_d14_3_neg_01_1	OvC8	CP	14	I
L1_ov264_C.P_d14_3_neg_02	OvC8	CP	14	II
L1_ov264_C.P_d14_3_neg_03	OvC8	CP	14	III
V1_ov264_C.P_d21_1_neg_01_1	OvC8	CP	21	I
V1_ov264_C.P_d21_1_neg_02	OvC8	CP	21	II
V1_ov264_C.P_d21_1_neg_03	OvC8	CP	21	III
W1_ov264_C.P_d21_2_neg_01_1	OvC8	CP	21	I
W1_ov264_C.P_d21_2_neg_02	OvC8	CP	21	II
W1_ov264_C.P_d21_2_neg_03	OvC8	CP	21	III
X1_ov264_C.P_d21_3_neg_01_1	OvC8	CP	21	I
X1_ov264_C.P_d21_3_neg_02	OvC8	CP	21	II
X1_ov264_C.P_d21_3_neg_03	OvC8	CP	21	III
A1_ov264_ctrl_d14_1_neg_01_1	OvC8	Ctrl	14	I
A1_ov264_ctrl_d14_1_neg_02	OvC8	Ctrl	14	II
A1_ov264_ctrl_d14_1_neg_03	OvC8	Ctrl	14	III
B1_ov264_ctrl_d14_2_neg_01_1	OvC8	Ctrl	14	I
B1_ov264_ctrl_d14_2_neg_02	OvC8	Ctrl	14	II
B1_ov264_ctrl_d14_2_neg_03	OvC8	Ctrl	14	III
C1_ov264_ctrl_d14_3_neg_01_1	OvC8	Ctrl	14	I
C1_ov264_ctrl_d14_3_neg_02	OvC8	Ctrl	14	II
C1_ov264_ctrl_d14_3_neg_03	OvC8	Ctrl	14	III
M1_ov264_ctrl_d21_1_neg_01_1	OvC8	Ctrl	21	I
M1_ov264_ctrl_d21_1_neg_02	OvC8	Ctrl	21	II
M1_ov264_ctrl_d21_1_neg_03	OvC8	Ctrl	21	III
N1_ov264_ctrl_d21_2_neg_01_1	OvC8	Ctrl	21	I
N1_ov264_ctrl_d21_2_neg_02	OvC8	Ctrl	21	II
N1_ov264_ctrl_d21_2_neg_03	OvC8	Ctrl	21	III
O1_ov264_ctrl_d21_3_neg_01_1	OvC8	Ctrl	21	I
O1_ov264_ctrl_d21_3_neg_02	OvC8	Ctrl	21	II
O1_ov264_ctrl_d21_3_neg_03	OvC8	Ctrl	21	III
G1_ov264_Pacli_d14_1_neg_01_1	OvC8	P	14	I
G1_ov264_Pacli_d14_1_neg_02	OvC8	P	14	II
G1_ov264_Pacli_d14_1_neg_03	OvC8	P	14	III
H1_ov264_Pacli_d14_2_neg_01_1	OvC8	P	14	I
H1_ov264_Pacli_d14_2_neg_02	OvC8	P	14	II
H1_ov264_Pacli_d14_2_neg_03	OvC8	P	14	III
I1_ov264_Pacli_d14_3_neg_01_1	OvC8	P	14	I
I1_ov264_Pacli_d14_3_neg_02	OvC8	P	14	II
I1_ov264_Pacli_d14_3_neg_03	OvC8	P	14	III
S1_ov264_Pacli_d21_1_neg_01_1	OvC8	P	21	I
S1_ov264_Pacli_d21_1_neg_02	OvC8	P	21	II
S1_ov264_Pacli_d21_1_neg_03	OvC8	P	21	III
T1_ov264_Pacli_d21_2_neg_01_1	OvC8	P	21	I
T1_ov264_Pacli_d21_2_neg_02	OvC8	P	21	II
T1_ov264_Pacli_d21_2_neg_03	OvC8	P	21	III
U1_ov264_Pacli_d21_3_neg_01_1	OvC8	P	21	I
U1_ov264_Pacli_d21_3_neg_02	OvC8	P	21	II
U1_ov264_Pacli_d21_3_neg_03	OvC8	P	21	III
BB1_ov265_Carbo_d14_1_neg_01_1	OvC5	C	14	I
BB1_ov265_Carbo_d14_1_neg_02	OvC5	C	14	II
BB1_ov265_Carbo_d14_1_neg_03	OvC5	C	14	III
CC1_ov265_carbo_d14_2_neg_01	OvC5	C	14	I
CC1_ov265_carbo_d14_2_neg_02	OvC5	C	14	II
CC1_ov265_carbo_d14_2_neg_03	OvC5	C	14	III
DD1_ov265_carbo_d14_3_neg_01	OvC5	C	14	I
DD1_ov265_carbo_d14_3_neg_02	OvC5	C	14	II
DD1_ov265_carbo_d14_3_neg_03	OvC5	C	14	III
NN1_ov265_Carbo_d21_1_neg_01	OvC5	C	21	I
NN1_ov265_Carbo_d21_1_neg_02	OvC5	C	21	II
NN1_ov265_Carbo_d21_1_neg_03	OvC5	C	21	III
OO1_ov265_carbo_d21_2_neg_01	OvC5	C	21	I
OO1_ov265_carbo_d21_2_neg_02	OvC5	C	21	II
OO1_ov265_carbo_d21_2_neg_03	OvC5	C	21	III
PP1_ov265_carbo_d21_3_neg_01	OvC5	C	21	I
PP1_ov265_carbo_d21_3_neg_02	OvC5	C	21	II
PP1_ov265_carbo_d21_3_neg_03	OvC5	C	21	III
HH1_ov265_C.P_d14_1_neg_01	OvC5	CP	14	I
HH1_ov265_C.P_d14_1_neg_02	OvC5	CP	14	II
HH1_ov265_C.P_d14_1_neg_03	OvC5	CP	14	III
II1_ov265_C.P_d14_2_neg_01	OvC5	CP	14	I
II1_ov265_C.P_d14_2_neg_02	OvC5	CP	14	II
II1_ov265_C.P_d14_2_neg_03	OvC5	CP	14	III
JJ1_ov265_C.P_d14_3_neg_01	OvC5	CP	14	I
JJ1_ov265_C.P_d14_3_neg_02	OvC5	CP	14	II
JJ1_ov265_C.P_d14_3_neg_03	OvC5	CP	14	III
TT1_ov265_C.P_d21_1_neg_01	OvC5	CP	21	I
TT1_ov265_C.P_d21_1_neg_02	OvC5	CP	21	II
TT1_ov265_C.P_d21_1_neg_03	OvC5	CP	21	III
UU1_ov265_C.P_d21_2_neg_01	OvC5	CP	21	I
UU1_ov265_C.P_d21_2_neg_02	OvC5	CP	21	II
UU1_ov265_C.P_d21_2_neg_03	OvC5	CP	21	III
VV1_ov265_C.P_d21_3_neg_01	OvC5	CP	21	I
VV1_ov265_C.P_d21_3_neg_02	OvC5	CP	21	II
VV1_ov265_C.P_d21_3_neg_03	OvC5	CP	21	III
Y1_ov265_ctrl_d14_1_neg_01_1	OvC5	Ctrl	14	I
Y1_ov265_ctrl_d14_1_neg_02	OvC5	Ctrl	14	II
Y1_ov265_ctrl_d14_1_neg_03	OvC5	Ctrl	14	III
Z1_ov265_ctrl_d14_2_neg_01_1	OvC5	Ctrl	14	I
Z1_ov265_ctrl_d14_2_neg_02	OvC5	Ctrl	14	II
Z1_ov265_ctrl_d14_2_neg_03	OvC5	Ctrl	14	III
AA1_ov265_ctrl_d14_3_neg_01_1	OvC5	Ctrl	14	I
AA1_ov265_ctrl_d14_3_neg_02	OvC5	Ctrl	14	II
AA1_ov265_ctrl_d14_3_neg_03	OvC5	Ctrl	14	III
KK1_ov265_ctrl_d21_1_neg_01	OvC5	Ctrl	21	I
KK1_ov265_ctrl_d21_1_neg_02	OvC5	Ctrl	21	II
KK1_ov265_ctrl_d21_1_neg_03	OvC5	Ctrl	21	III
LL1_ov265_ctrl_d21_2_neg_01	OvC5	Ctrl	21	I
LL1_ov265_ctrl_d21_2_neg_02	OvC5	Ctrl	21	II
LL1_ov265_ctrl_d21_2_neg_03	OvC5	Ctrl	21	III
MM1_ov265_ctrl_d21_3_neg_01	OvC5	Ctrl	21	I
MM1_ov265_ctrl_d21_3_neg_02	OvC5	Ctrl	21	II
MM1_ov265_ctrl_d21_3_neg_03	OvC5	Ctrl	21	III
EE1_ov265_Pacli_d14_1_neg_01	OvC5	P	14	I
EE1_ov265_Pacli_d14_1_neg_02	OvC5	P	14	II
EE1_ov265_Pacli_d14_1_neg_03	OvC5	P	14	III
FF1_ov265_Pacli_d14_2_neg_01	OvC5	P	14	I
FF1_ov265_Pacli_d14_2_neg_02	OvC5	P	14	II
FF1_ov265_Pacli_d14_2_neg_03	OvC5	P	14	III
GG1_ov265_Pacli_d14_3_neg_01	OvC5	P	14	I
GG1_ov265_Pacli_d14_3_neg_02	OvC5	P	14	II
GG1_ov265_Pacli_d14_3_neg_03	OvC5	P	14	III
QQ1_ov265_Pacli_d21_1_neg_01	OvC5	P	21	I
QQ1_ov265_Pacli_d21_1_neg_02	OvC5	P	21	II
QQ1_ov265_Pacli_d21_1_neg_03	OvC5	P	21	III
RR1_ov265_Pacli_d21_2_neg_01	OvC5	P	21	I
RR1_ov265_Pacli_d21_2_neg_02	OvC5	P	21	II
RR1_ov265_Pacli_d21_2_neg_03	OvC5	P	21	III
SS1_ov265_Pacli_d21_3_neg_01	OvC5	P	21	I
SS1_ov265_Pacli_d21_3_neg_02	OvC5	P	21	II
SS1_ov265_Pacli_d21_3_neg_03	OvC5	P	21	III
WW1_meio_1_neg_01		Medium
WW1_meio_1_neg_02		Medium
WW1_meio_1_neg_03		Medium
XX1_meio_2_neg_01		Medium
XX1_meio_2_neg_02		Medium
XX1_meio_2_neg_03		Medium
YY1_meio_3_neg_01		Medium
YY1_meio_3_neg_02		Medium
YY1_meio_3_neg_03		Medium
QC_A_neg_01_190603210614		QC
QC_A_neg_10		QC
QC_A_neg_11		QC
QC_A_neg_12		QC
QC_A_neg_13		QC
QC_A_neg_14		QC
QC_A_neg_15		QC
QC_A_neg_16		QC
QC_A_neg_02_1		QC
QC_A_neg_03_1		QC
QC_A_neg_04		QC
QC_A_neg_05		QC
QC_A_neg_06		QC
QC_A_neg_07		QC
QC_A_neg_08		QC
QC_A_neg_09		QC

## Sheet: peakList_HILIC (+)
	mz	mzmin	mzmax	rt	rtmin	rtmax	npeaks	carbo	CP	ctrl	meio	pacli	QC	BB1_ov265_Carbo_d14_1_01	BB1_ov265_Carbo_d14_1_02	BB1_ov265_Carbo_d14_1_03	CC1_ov265_carbo_d14_2_01	CC1_ov265_carbo_d14_2_02	CC1_ov265_carbo_d14_2_03	D1_ov264_Carbo_d14_1_01_190531131659	D1_ov264_Carbo_d14_1_02	D1_ov264_Carbo_d14_1_03	DD1_ov265_carbo_d14_3_01	DD1_ov265_carbo_d14_3_02	DD1_ov265_carbo_d14_3_03	E1_ov264_carbo_d14_2_01_190531133815	E1_ov264_carbo_d14_2_02	E1_ov264_carbo_d14_2_03	F1_ov264_carbo_d14_3_01_190531142049	F1_ov264_carbo_d14_3_02	F1_ov264_carbo_d14_3_03	NN1_ov265_Carbo_d21_1_01	NN1_ov265_Carbo_d21_1_02	NN1_ov265_Carbo_d21_1_03	OO1_ov265_carbo_d21_2_01	OO1_ov265_carbo_d21_2_02	OO1_ov265_carbo_d21_2_03	P1_ov264_Carbo_d21_1_01	P1_ov264_Carbo_d21_1_02	P1_ov264_Carbo_d21_1_03	PP1_ov265_carbo_d21_3_01	PP1_ov265_carbo_d21_3_02	PP1_ov265_carbo_d21_3_03	Q1_ov264_carbo_d21_2_01	Q1_ov264_carbo_d21_2_02	Q1_ov264_carbo_d21_2_03	R1_ov264_carbo_d21_3_01	R1_ov264_carbo_d21_3_02	R1_ov264_carbo_d21_3_03
1	75.0321	75.031	75.0344	345.536	344.267	353.855	128	30	28	25	7	26	12	1.36875e+06	1.00093e+06	1.01982e+06	1.35715e+06	1.08235e+06	1.26832e+06	391755	1.15644e+06	901060	1.33925e+06	1.34127e+06	1.21213e+06	1.20617e+06	1.06358e+06	1.24584e+06	1.04085e+06	1.49284e+06	1.44887e+06	1.51435e+06	1.66469e+06	1.40453e+06	1.37507e+06	1.2489e+06	1.09135e+06	633258	1.17312e+06	1.06427e+06	1.23153e+06	1.45973e+06	1.28398e+06	1.40131e+06	1.09363e+06	1.38768e+06	1.57598e+06	1.40074e+06	1.27426e+06
2	75.0696	75.0644	75.1091	430.417	405.452	432.703	49	17	4	13	7	4	4	210557	244071	248571	285625	344155	289742	24981.4	182230	125823	187335	198135	237357	270788	128311	215462	192092	161952	243209	337052	338228	278739	217618	317560	272813	47985.2	246592	179918	315119	327067	616395	258977	234154	245264	271058	266244	275351
3	76.0458	76.0398	76.0524	432.583	429.904	435.544	167	36	36	34	9	36	16	1.83557e+07	1.79896e+07	1.83682e+07	1.77684e+07	1.93191e+07	2.23619e+07	4.80957e+06	1.48027e+07	1.17808e+07	1.76093e+07	1.78941e+07	1.87454e+07	1.63085e+07	1.35826e+07	1.54916e+07	1.92762e+07	1.77734e+07	1.80366e+07	1.98267e+07	1.94402e+07	1.92837e+07	1.83339e+07	1.80199e+07	1.78573e+07	7.7507e+06	1.76055e+07	1.72035e+07	2.1978e+07	2.24712e+07	2.28666e+07	1.79447e+07	1.77425e+07	1.80888e+07	2.02075e+07	2.01129e+07	2.05113e+07
4	76.0781	76.0706	76.0835	363.046	359.667	371.697	89	19	16	20	0	20	14	1.33091e+06	1.16735e+06	1.25461e+06	1.21798e+06	1.31483e+06	1.3632e+06	364737	990584	869697	1.15203e+06	1.11061e+06	1.02377e+06	986017	928562	831985	1.24928e+06	985662	967121	905872	738085	746977	849943	736660	650944	592059	742653	608293	1.07761e+06	978821	985601	861840	793486	707821	869424	870251	810798
5	76.0393	76.0379	76.0398	205.239	193.446	206.118	32	19	0	13	0	0	0	2.02867e+06	1.94754e+06	1.95055e+06	1.96567e+06	2.35788e+06	2.41065e+06	33319.1	1.86892e+06	1.54451e+06	2.18147e+06	2.20652e+06	2.17393e+06	1.78232e+06	1.9084e+06	2.05633e+06	2.0881e+06	2.0115e+06	2.18405e+06	786160	952993	971598	887539	966980	938066	380555	1.08646e+06	1.09652e+06	966329	1.09917e+06	1.15438e+06	930322	1.06769e+06	1.03669e+06	1.18807e+06	1.18902e+06	1.27994e+06
6	77.0385	77.0372	77.0391	341.976	341.312	349.236	167	36	36	34	9	36	16	5.37245e+06	5.28728e+06	5.41014e+06	5.29137e+06	6.09507e+06	6.45539e+06	1.52051e+06	4.56042e+06	3.52351e+06	5.16615e+06	5.09396e+06	5.15396e+06	5.00885e+06	4.67506e+06	5.08338e+06	5.89414e+06	5.90385e+06	5.64265e+06	5.54153e+06	5.51381e+06	5.11818e+06	5.60553e+06	5.26247e+06	5.47865e+06	2.29412e+06	4.93098e+06	4.68615e+06	5.88726e+06	5.9242e+06	6.08751e+06	5.11558e+06	5.39974e+06	5.28342e+06	5.74647e+06	5.72863e+06	5.76818e+06
7	77.9261	77.9187	77.9289	385.927	384.869	386.945	167	36	36	34	9	36	16	1.27211e+06	1.41172e+06	1.47592e+06	1.29924e+06	1.48441e+06	1.36144e+06	558996	1.31719e+06	1.1647e+06	1.24952e+06	1.45692e+06	1.51657e+06	1.50984e+06	1.25661e+06	1.26976e+06	1.4488e+06	1.35032e+06	1.50903e+06	1.34358e+06	1.39686e+06	1.54752e+06	1.37942e+06	1.344e+06	1.43517e+06	708454	1.30954e+06	1.30737e+06	1.27537e+06	1.4539e+06	1.3809e+06	1.26258e+06	1.36071e+06	1.33695e+06	1.1403e+06	1.41165e+06	1.4192e+06
8	78.0338	78.022	78.0417	107.763	106.284	108.632	107	36	11	34	9	4	13	1.03989e+06	892759	967436	1.081e+06	1.06318e+06	1.26523e+06	375574	756489	645672	876105	801026	819639	1.00213e+06	803170	737345	989966	879950	922769	1.18367e+06	1.12685e+06	1.18455e+06	992859	1.02801e+06	967450	474002	951128	885638	997136	1.08326e+06	1.19554e+06	901274	1.07619e+06	928107	1.00218e+06	905205	958023
9	79.0389	79.0275	79.047	107.657	105.109	108.592	167	36	36	34	9	36	16	3.45748e+06	3.64897e+06	3.56068e+06	3.57458e+06	3.92716e+06	3.9632e+06	2.1261e+06	2.99916e+06	2.72814e+06	3.34943e+06	3.14949e+06	3.33646e+06	3.71504e+06	3.07084e+06	3.32716e+06	3.77207e+06	3.30916e+06	3.27733e+06	3.98784e+06	3.8314e+06	4.0318e+06	3.72967e+06	3.58869e+06	3.71656e+06	2.15696e+06	3.28606e+06	3.2937e+06	3.88396e+06	3.81533e+06	4.10421e+06	3.4896e+06	3.74653e+06	3.73383e+06	3.54345e+06	3.57776e+06	3.41723e+06
10	79.0478	79.0445	79.0645	340.578	339.559	348.103	159	34	36	31	7	35	16	1.62763e+06	1.47773e+06	1.52802e+06	1.48442e+06	1.71498e+06	1.78234e+06	906911	1.59538e+06	654608	949518	1.65224e+06	1.44598e+06	1.09843e+06	1.44443e+06	968979	1.57618e+06	1.4009e+06	1.58735e+06	1.54167e+06	1.5014e+06	1.53352e+06	1.56954e+06	1.49741e+06	1.54491e+06	417323	1.4433e+06	1.54781e+06	1.61422e+06	1.43746e+06	1.58365e+06	828586	1.3322e+06	904789	1.51313e+06	1.40873e+06	1.42661e+06
11	80.003	79.9937	80.0123	385.388	384.45	386.536	167	36	36	34	9	36	16	3.78582e+06	4.00421e+06	4.22019e+06	3.84671e+06	4.15475e+06	4.54864e+06	2.02382e+06	3.68143e+06	3.3084e+06	3.67375e+06	4.14329e+06	4.277e+06	4.25393e+06	3.69072e+06	3.95408e+06	4.47441e+06	4.20648e+06	4.31223e+06	4.42382e+06	4.25648e+06	4.62384e+06	4.04067e+06	4.25033e+06	4.2901e+06	2.27974e+06	3.9258e+06	3.74295e+06	3.98263e+06	4.38973e+06	4.48631e+06	3.77472e+06	3.8137e+06	4.23631e+06	3.74493e+06	4.27328e+06	4.25134e+06
12	80.0492	80.0332	80.0535	107.009	104.836	108.65	167	36	36	34	9	36	16	3.12468e+06	3.03371e+06	3.02778e+06	3.09174e+06	3.4141e+06	3.53841e+06	1.54863e+06	2.55458e+06	2.07338e+06	2.82646e+06	2.79309e+06	2.70291e+06	3.3901e+06	2.58925e+06	2.71205e+06	3.33421e+06	2.85985e+06	2.88132e+06	3.66996e+06	3.27032e+06	3.43284e+06	3.21956e+06	3.03765e+06	3.09156e+06	1.61557e+06	2.8495e+06	2.64608e+06	3.2464e+06	3.28261e+06	3.34062e+06	3.28605e+06	3.02338e+06	2.92621e+06	3.11155e+06	2.98781e+06	3.00549e+06
13	80.0492	80.0435	80.0514	351.169	349.712	358.34	163	34	36	33	9	36	15	1.84599e+06	1.95208e+06	1.9528e+06	1.78426e+06	2.28688e+06	2.41624e+06	791106	1.79035e+06	1.51765e+06	1.95924e+06	1.90974e+06	1.91434e+06	1.92592e+06	1.72986e+06	2.04454e+06	1.85057e+06	1.95201e+06	2.21913e+06	2.38641e+06	2.45121e+06	1.93004e+06	2.07014e+06	2.10349e+06	2.04293e+06	1.0106e+06	1.96352e+06	1.93679e+06	2.17532e+06	2.37895e+06	2.28591e+06	2.04393e+06	2.09364e+06	2.0244e+06	2.0724e+06	2.10295e+06	2.2502e+06
14	80.9478	80.9477	80.9479	189.705	188.238	195.179	122	20	31	24	2	33	12	1.1638e+07	1.09622e+07	1.22662e+07	1.28133e+07	1.30259e+07	1.24141e+07	1.05717e+07	1.19055e+07	1.20188e+07	1.23464e+07	1.30894e+07	1.34397e+07	9.13801e+06	1.26441e+07	1.21668e+07	8.60587e+06	1.13727e+07	1.16606e+07	1.20026e+07	1.19977e+07	1.27685e+07	1.10059e+07	1.15441e+07	1.11605e+07	1.0338e+07	1.1667e+07	1.18228e+07	1.19585e+07	1.42759e+07	1.19973e+07	1.09928e+07	1.14769e+07	1.20307e+07	1.15661e+07	1.22136e+07	1.14899e+07
15	81.078	81.0692	81.1353	70.0329	66.8363	75.3146	55	1	18	4	2	20	10	146660	152564	143251	253930	258145	516753	55069.9	113850	90417.4	202502	267332	209443	152832	121005	165765	129738	154852	142298	373546	442116	373938	214837	237482	188965	91428.3	128254	124209	173712	166123	156748	74773.5	108941	48126.7	220805	215299	180871
16	82.0139	82.0135	82.0147	633.269	631.334	638.487	134	28	25	29	9	28	15	1.15424e+06	1.14412e+06	1.15166e+06	1.23921e+06	1.35932e+06	1.52686e+06	353562	652057	511177	1.30667e+06	1.31476e+06	1.26746e+06	1.33908e+06	907965	1.00532e+06	1.48358e+06	1.09692e+06	1.07085e+06	1.50983e+06	1.53714e+06	1.57833e+06	1.41247e+06	1.34093e+06	1.33261e+06	498974	1.20386e+06	1.23998e+06	1.69087e+06	1.62828e+06	1.7042e+06	1.41474e+06	1.34213e+06	1.4222e+06	1.64016e+06	1.62421e+06	1.65072e+06
17	82.0525	82.0525	82.0525	239.689	234.826	277.768	165	34	36	34	9	36	16	3.11067e+07	3.09698e+07	3.03707e+07	3.05548e+07	3.33898e+07	3.44306e+07	8.28668e+06	2.38706e+07	1.90326e+07	2.81638e+07	2.95247e+07	3.00814e+07	2.32788e+07	2.41027e+07	2.71156e+07	2.55389e+07	3.02386e+07	3.07587e+07	2.96188e+07	3.00334e+07	3.01036e+07	2.77133e+07	2.88163e+07	2.83849e+07	1.16185e+07	2.58178e+07	2.52456e+07	3.11432e+07	3.28767e+07	3.35191e+07	2.67013e+07	2.68151e+07	2.77995e+07	2.84292e+07	2.95136e+07	2.99668e+07
18	82.9978	82.9978	82.9979	633.32	630.138	637.943	149	31	29	32	9	33	15	4.26498e+06	4.06003e+06	4.18757e+06	4.44805e+06	4.58841e+06	5.07e+06	1.68789e+06	2.72396e+06	2.1682e+06	4.49151e+06	4.50488e+06	4.57601e+06	4.49682e+06	3.16274e+06	3.80666e+06	4.9115e+06	3.97963e+06	3.90698e+06	5.31122e+06	5.20217e+06	5.06345e+06	4.76409e+06	4.6203e+06	4.57666e+06	2.2545e+06	4.27182e+06	4.23451e+06	5.6583e+06	5.65416e+06	5.80884e+06	4.90403e+06	4.6765e+06	4.68099e+06	5.32779e+06	5.34092e+06	5.12317e+06
19	82.9449	82.9449	82.9449	189.977	188.391	195.751	35	21	0	13	0	0	1	3.80965e+06	4.0785e+06	4.1431e+06	4.42872e+06	4.32959e+06	4.2844e+06	3.85025e+06	4.3016e+06	4.34963e+06	4.42965e+06	4.4133e+06	4.96931e+06	3.33089e+06	4.24452e+06	4.46919e+06	3.07922e+06	3.99108e+06	4.26365e+06	4.53703e+06	4.38527e+06	4.46564e+06	4.01632e+06	4.13282e+06	4.18008e+06	3.6146e+06	4.24804e+06	4.25326e+06	4.22195e+06	4.22898e+06	4.44953e+06	4.04558e+06	4.27921e+06	4.44889e+06	4.23674e+06	4.42978e+06	4.59548e+06
20	84.0801	84.0789	84.0803	526.762	526.388	527.058	167	36	36	34	9	36	16	6.51896e+07	6.27208e+07	6.2987e+07	6.59399e+07	7.08651e+07	7.76394e+07	1.62209e+07	5.24252e+07	4.08259e+07	5.99927e+07	6.09352e+07	6.2246e+07	5.33458e+07	5.12153e+07	5.68802e+07	6.12627e+07	6.23236e+07	6.34363e+07	6.82462e+07	6.74521e+07	6.81664e+07	5.99485e+07	5.95706e+07	5.8446e+07	2.08865e+07	5.50018e+07	5.25782e+07	6.82464e+07	7.0839e+07	7.18905e+07	5.73506e+07	6.04411e+07	6.03922e+07	6.38497e+07	6.56531e+07	6.81463e+07
21	84.0808	84.079	84.0817	393.969	393.081	395.701	167	36	36	34	9	36	16	2.85882e+07	2.78828e+07	2.89459e+07	2.80673e+07	2.75812e+07	2.79393e+07	2.86726e+07	2.46493e+07	2.52649e+07	2.72033e+07	2.67191e+07	2.65964e+07	3.05195e+07	2.56774e+07	2.53947e+07	3.02791e+07	2.45611e+07	2.5124e+07	2.56215e+07	2.63849e+07	2.69884e+07	2.6426e+07	2.57519e+07	2.64422e+07	2.71984e+07	2.52374e+07	2.5612e+07	2.5978e+07	2.6078e+07	2.68267e+07	2.84064e+07	2.59825e+07	2.58599e+07	2.77194e+07	2.53284e+07	2.54317e+07
22	84.0466	84.0442	84.0493	444.537	441.757	448.111	167	36	36	34	9	36	16	6.45692e+07	6.25431e+07	6.11593e+07	5.6333e+07	6.3429e+07	6.98072e+07	1.03984e+07	3.40283e+07	2.62854e+07	5.38235e+07	5.55788e+07	5.7047e+07	3.88691e+07	3.33988e+07	3.88137e+07	4.37573e+07	4.2525e+07	4.19491e+07	4.28207e+07	4.11679e+07	4.18702e+07	3.89764e+07	3.81388e+07	3.8008e+07	1.36228e+07	3.49542e+07	3.44802e+07	5.29823e+07	5.55705e+07	5.78566e+07	3.96323e+07	3.92209e+07	4.05362e+07	4.40784e+07	4.4427e+07	4.52976e+07
23	84.0808	84.0444	84.0808	232.397	191.856	235.868	168	36	36	34	9	36	16	7.13353e+07	7.36727e+07	7.17615e+07	7.02902e+07	7.04845e+07	7.09323e+07	1.55654e+07	6.53528e+07	6.35638e+07	6.79524e+07	6.71671e+07	7.1713e+07	8.37658e+07	6.91725e+07	6.74017e+07	9.00474e+07	6.89842e+07	6.89125e+07	6.96866e+07	7.13375e+07	6.84048e+07	6.76152e+07	6.72596e+07	6.65858e+07	3.73159e+07	7.11997e+07	6.82563e+07	6.91384e+07	6.75199e+07	6.92543e+07	7.45477e+07	7.18119e+07	6.93444e+07	6.99308e+07	6.93172e+07	6.67709e+07
24	85.0777	85.0716	85.0804	526.946	526.506	527.526	166	35	36	34	9	36	16	3.95754e+06	3.74589e+06	3.46553e+06	4.04611e+06	4.05348e+06	4.25295e+06	1.2681e+06	3.09148e+06	2.24573e+06	3.76449e+06	3.34182e+06	3.60349e+06	3.07559e+06	3.26806e+06	3.44568e+06	3.61504e+06	3.48577e+06	3.73846e+06	4.07507e+06	3.73651e+06	3.80787e+06	3.48741e+06	3.44145e+06	3.13184e+06	1.65937e+06	3.21973e+06	2.97866e+06	4.09228e+06	4.13852e+06	4.0801e+06	3.57879e+06	3.45313e+06	3.59037e+06	3.81746e+06	3.88423e+06	3.67934e+06
25	85.076	85.0759	85.0776	328.376	326.805	332.725	164	34	36	34	9	36	15	2.85079e+06	2.68736e+06	2.6615e+06	2.91428e+06	2.97739e+06	2.93722e+06	1.21664e+06	2.64212e+06	1.93461e+06	2.74684e+06	2.72688e+06	2.78737e+06	3.48308e+06	2.44051e+06	2.57126e+06	3.88853e+06	3.2109e+06	2.98207e+06	3.21067e+06	2.91433e+06	2.79209e+06	2.86285e+06	2.77956e+06	2.76664e+06	1.55882e+06	2.86346e+06	2.74318e+06	3.09794e+06	3.20164e+06	3.15854e+06	3.05585e+06	2.89956e+06	2.82244e+06	3.15789e+06	3.22658e+06	2.94076e+06
26	85.0622	84.9208	85.0674	391.32	375.891	393.612	167	36	36	34	9	36	16	1.26222e+07	1.1892e+07	1.25917e+07	1.22192e+07	1.23171e+07	1.18594e+07	9.04712e+06	1.13885e+07	1.15034e+07	1.1844e+07	1.15004e+07	1.14606e+07	1.49502e+07	1.17047e+07	1.19269e+07	1.47919e+07	1.24478e+07	1.20984e+07	1.41863e+07	1.38571e+07	1.34503e+07	1.28684e+07	1.24749e+07	1.43117e+07	1.05906e+07	1.2932e+07	1.32261e+07	1.45191e+07	1.51451e+07	1.61399e+07	1.32325e+07	1.29514e+07	1.32636e+07	1.37694e+07	1.31767e+07	1.34382e+07
27	85.0816	85.0761	85.0831	234.436	231.251	240.235	92	26	12	25	1	15	13	3.57179e+06	3.41762e+06	3.35344e+06	3.46525e+06	3.30594e+06	3.54855e+06	759745	3.16042e+06	2.57749e+06	3.43086e+06	3.34386e+06	3.43664e+06	3.78624e+06	3.14269e+06	3.17754e+06	4.02672e+06	3.27085e+06	3.18663e+06	3.20399e+06	3.41148e+06	3.19934e+06	3.10735e+06	3.06537e+06	3.1695e+06	1.38294e+06	3.06114e+06	3.07757e+06	3.33787e+06	3.15052e+06	3.22558e+06	3.65354e+06	3.12128e+06	3.11662e+06	3.34429e+06	3.27697e+06	3.27206e+06
28	85.0551	85.0454	85.0649	441.119	430.11	444.859	31	4	2	9	9	6	1	3.36564e+06	3.36959e+06	3.51188e+06	3.6422e+06	3.15232e+06	3.26699e+06	2.74674e+06	2.9889e+06	2.82765e+06	3.33865e+06	3.36491e+06	3.44497e+06	4.09566e+06	3.00656e+06	3.16426e+06	4.22989e+06	3.54679e+06	3.56398e+06	3.57594e+06	3.54079e+06	3.62365e+06	3.39122e+06	3.54515e+06	3.65929e+06	2.22196e+06	3.24801e+06	3.23689e+06	3.48659e+06	3.67973e+06	3.99403e+06	3.29432e+06	3.26046e+06	3.42272e+06	3.58454e+06	3.56191e+06	3.46271e+06
29	86.0963	86.0942	86.0964	349.659	348.735	356.651	169	36	36	36	9	36	16	1.43543e+09	1.40765e+09	1.35888e+09	1.43211e+09	1.51636e+09	1.6096e+09	5.05763e+08	1.25022e+09	1.04489e+09	1.36104e+09	1.38278e+09	1.38217e+09	1.35713e+09	1.26527e+09	1.39865e+09	1.47457e+09	1.48733e+09	1.48908e+09	1.62059e+09	1.5946e+09	1.58093e+09	1.50818e+09	1.51348e+09	1.47486e+09	7.22212e+08	1.39154e+09	1.31926e+09	1.58579e+09	1.62117e+09	1.637e+09	1.48067e+09	1.48746e+09	1.47767e+09	1.52952e+09	1.53984e+09	1.52232e+09
30	86.9083	86.9061	86.9088	379.194	377.067	381.475	108	29	25	19	9	21	5	2.36076e+06	2.25474e+06	2.19336e+06	2.29437e+06	2.32881e+06	2.74625e+06	552545	1.89465e+06	1.35306e+06	2.0963e+06	2.15785e+06	2.30104e+06	1.91769e+06	1.64324e+06	1.86805e+06	2.77685e+06	2.11459e+06	2.12895e+06	4.77457e+06	4.52915e+06	4.48725e+06	4.35565e+06	4.1719e+06	4.01737e+06	2.35747e+06	3.65752e+06	3.66793e+06	5.14723e+06	5.21808e+06	5.66715e+06	4.47283e+06	4.24785e+06	4.1288e+06	4.83562e+06	4.53395e+06	4.68061e+06
31	87.0996	87.0994	87.0997	349.844	349.006	356.896	167	36	36	34	9	36	16	7.55179e+07	7.43161e+07	7.22215e+07	7.46098e+07	7.96168e+07	8.40503e+07	2.62134e+07	6.49391e+07	5.44574e+07	7.1934e+07	7.13694e+07	7.28673e+07	7.00428e+07	6.63732e+07	7.32388e+07	7.61412e+07	7.79619e+07	7.77623e+07	8.40004e+07	8.39542e+07	8.3618e+07	7.8359e+07	7.95302e+07	7.68674e+07	3.77923e+07	7.32266e+07	6.89679e+07	8.27177e+07	8.61583e+07	8.52913e+07	7.88116e+07	7.7571e+07	7.7924e+07	8.02816e+07	8.1828e+07	7.94573e+07
32	88.0387	88.0367	88.0392	448.894	445.105	451.219	167	36	36	34	9	36	16	2.89997e+06	2.86328e+06	2.89483e+06	3.4168e+06	3.92978e+06	4.13786e+06	789493	3.46981e+06	2.7059e+06	1.46095e+06	1.5365e+06	1.60018e+06	3.77226e+06	3.42671e+06	4.08024e+06	3.65158e+06	3.8588e+06	3.97105e+06	6.22846e+06	6.11286e+06	6.14908e+06	5.2126e+06	5.31052e+06	5.25512e+06	1.48719e+06	4.64404e+06	4.72486e+06	4.6e+06	4.88189e+06	4.8725e+06	5.29707e+06	5.68953e+06	5.90047e+06	5.39592e+06	5.46393e+06	5.67249e+06
33	88.0303	87.9794	88.0337	368.986	367.866	406.765	127	24	22	29	3	34	14	575546	417424	352993	518967	677297	528727	112363	466522	334601	437764	457020	444139	594774	498825	378272	684995	676827	507597	694668	517206	584410	622413	627313	525637	159340	465118	447435	527523	505337	635733	688836	461433	414152	604966	539303	474900
34	88.038	88.0301	88.0395	179.409	177.953	179.959	83	34	2	31	9	5	2	579960	677577	764314	605970	749474	846454	267251	446425	378222	474908	710120	765051	858360	497138	750245	1.09925e+06	769322	766505	603013	594159	631334	541406	602076	614007	204567	545204	535460	591739	719082	716896	452287	531508	555130	504958	635279	643185
35	89.0596	89.0594	89.0616	103.951	66.9239	106.129	169	36	36	34	9	36	16	5.79205e+06	5.74028e+06	5.78956e+06	8.19288e+06	9.38069e+06	1.07026e+07	3.08588e+06	7.20593e+06	5.91087e+06	8.02351e+06	8.50726e+06	9.23157e+06	7.76882e+06	7.00569e+06	8.01586e+06	1.23719e+07	1.24842e+07	1.29823e+07	1.17429e+07	1.22121e+07	1.1897e+07	8.33685e+06	8.64418e+06	8.77442e+06	6.70573e+06	1.50356e+07	1.39919e+07	7.75848e+06	8.2188e+06	8.50029e+06	8.50444e+06	8.96158e+06	9.34182e+06	6.45648e+06	6.59988e+06	6.89009e+06
36	89.0414	89.0338	89.051	349.616	345.78	356.651	167	36	36	34	9	36	16	4.80102e+06	4.87483e+06	4.74047e+06	5.31741e+06	5.16545e+06	4.62333e+06	3.05892e+06	5.68711e+06	5.08807e+06	4.48293e+06	3.56933e+06	3.60718e+06	5.29885e+06	5.90891e+06	6.04067e+06	5.3071e+06	6.17611e+06	5.85834e+06	7.38772e+06	6.92291e+06	7.63536e+06	7.56222e+06	7.45155e+06	7.1697e+06	4.79488e+06	7.17437e+06	6.48255e+06	6.14679e+06	6.11695e+06	5.69984e+06	6.87549e+06	6.95035e+06	6.68013e+06	6.18679e+06	6.50103e+06	6.28485e+06
37	90.0547	90.0541	90.0555	419.507	418.91	420.777	167	36	36	34	9	36	16	1.12501e+08	1.05182e+08	1.02197e+08	1.09754e+08	1.12148e+08	1.19284e+08	1.55168e+07	4.57733e+07	3.60282e+07	8.91173e+07	8.60359e+07	8.68833e+07	4.64609e+07	4.1736e+07	4.49891e+07	5.22857e+07	5.13267e+07	5.06354e+07	4.19338e+07	3.97041e+07	3.85434e+07	5.87825e+07	5.58424e+07	5.38899e+07	1.62903e+07	3.64345e+07	3.48697e+07	4.61279e+07	4.64175e+07	4.59473e+07	3.28161e+07	3.26718e+07	3.20812e+07	4.14823e+07	4.02269e+07	3.96036e+07
38	90.0913	90.0912	90.0913	328.965	327.84	333.042	117	19	33	18	1	31	15	9.52859e+06	9.22706e+06	9.29454e+06	9.16652e+06	1.00815e+07	1.06389e+07	5.64751e+06	8.52501e+06	6.73965e+06	9.33012e+06	9.4818e+06	9.51949e+06	8.42725e+06	8.51113e+06	8.95912e+06	8.8995e+06	9.71863e+06	9.38595e+06	9.71544e+06	9.29824e+06	9.24849e+06	9.2e+06	9.00268e+06	9.13567e+06	6.03898e+06	8.97797e+06	8.39245e+06	1.02815e+07	1.01169e+07	1.01236e+07	9.18742e+06	8.90883e+06	8.77512e+06	9.61531e+06	9.5101e+06	9.55127e+06
39	90.0372	90.0282	90.0913	368.845	363.761	372.039	47	15	3	16	9	0	4	544703	544419	498457	619575	597749	749061	1.0222e+07	436265	300853	481684	451570	341045	6.82485e+06	7.34303e+06	455726	693501	532308	597506	526070	625204	592549	702334	731376	528212	9.76039e+06	573918	407225	668300	480069	738778	638283	493873	508855	737868	581336	441030
40	90.9766	90.9764	90.9779	407.036	406.862	416.079	169	36	36	36	9	36	16	9.79943e+07	9.74757e+07	9.58136e+07	9.91124e+07	1.00904e+08	1.00587e+08	7.82301e+07	9.82116e+07	9.16491e+07	9.72916e+07	9.91503e+07	9.89215e+07	1.0932e+08	9.6245e+07	9.56995e+07	1.14332e+08	1.00069e+08	9.79735e+07	1.00808e+08	9.92885e+07	9.97669e+07	9.83633e+07	9.72173e+07	9.64687e+07	8.13515e+07	9.607e+07	9.43383e+07	1.0344e+08	1.02336e+08	1.0221e+08	1.00159e+08	9.89762e+07	9.89928e+07	1.01271e+08	1.01764e+08	9.82763e+07
41	91.0546	91.0543	91.0553	342.226	341.204	348.955	167	36	36	34	9	36	16	9.43552e+06	9.67303e+06	8.65084e+06	1.0018e+07	1.1357e+07	1.16403e+07	2.6826e+06	8.35422e+06	6.08642e+06	8.89335e+06	9.34394e+06	9.53935e+06	8.57614e+06	8.00623e+06	9.07759e+06	1.0907e+07	1.11182e+07	1.1109e+07	1.07354e+07	1.01092e+07	1.01695e+07	9.41247e+06	9.00665e+06	9.42531e+06	3.63716e+06	7.51529e+06	6.08379e+06	1.10245e+07	1.12657e+07	8.0744e+06	9.57386e+06	9.2768e+06	7.68747e+06	1.04867e+07	1.03389e+07	1.01428e+07
42	91.0544	91.0543	91.0554	198.444	157.022	205.008	103	16	32	14	0	29	12	7.8202e+06	7.08003e+06	4.10395e+06	7.56768e+06	7.39774e+06	4.94929e+06	3.19319e+06	6.20828e+06	3.21628e+06	4.77685e+06	7.50229e+06	7.23673e+06	5.89544e+06	4.54047e+06	5.01804e+06	8.36685e+06	6.84976e+06	6.47451e+06	4.17316e+06	3.7552e+06	3.69844e+06	3.90247e+06	3.85296e+06	3.64108e+06	2.07136e+06	3.92764e+06	3.83675e+06	4.23869e+06	4.05929e+06	4.18603e+06	4.60134e+06	3.79148e+06	3.69233e+06	4.92522e+06	4.3304e+06	4.01007e+06
43	91.0545	91.0543	91.0595	103.984	99.2493	116.598	71	14	13	14	9	9	12	2.45195e+06	2.58615e+06	2.503e+06	2.58441e+06	2.94233e+06	3.27191e+06	2.08289e+06	3.21976e+06	2.88552e+06	2.53035e+06	2.71111e+06	2.79573e+06	4.41578e+06	3.47223e+06	4.05006e+06	4.29079e+06	3.92765e+06	4.1562e+06	6.07378e+06	1.24834e+07	1.24424e+07	6.03319e+06	1.14756e+07	1.22529e+07	2.65169e+06	6.60096e+06	6.92327e+06	6.61332e+06	1.41808e+07	1.5435e+07	1.35763e+07	1.37721e+07	1.40179e+07	1.56038e+07	1.577e+07	1.59033e+07
44	91.0541	91.0537	91.0826	69.6692	64.351	73.3451	56	20	4	23	2	3	4	5.03921e+06	4.88631e+06	4.88353e+06	5.02321e+06	5.25537e+06	6.23204e+06	1.70951e+06	4.13656e+06	3.86331e+06	4.70673e+06	4.88347e+06	5.38331e+06	5.05974e+06	4.41487e+06	5.58463e+06	6.02887e+06	5.48191e+06	9.42151e+06	5.94088e+06	6.19674e+06	6.30776e+06	1.25263e+07	5.21161e+06	5.7437e+06	2.77614e+06	6.37983e+06	1.35014e+07	1.41171e+07	6.51044e+06	7.40846e+06	5.34923e+06	6.11798e+06	6.43157e+06	6.19152e+06	7.02039e+06	7.50454e+06
45	93.0657	93.0621	93.0719	344.455	340.543	358.067	131	26	25	27	9	30	14	2.50853e+06	2.0227e+06	2.25271e+06	2.71419e+06	2.62425e+06	3.31408e+06	1.16807e+06	2.20963e+06	2.27662e+06	2.80548e+06	2.85237e+06	2.89101e+06	2.26354e+06	2.5826e+06	2.28152e+06	2.61716e+06	2.72884e+06	2.95864e+06	1.58079e+06	1.92225e+06	1.71821e+06	1.68963e+06	1.77596e+06	1.45012e+06	1.0943e+06	2.09833e+06	2.05263e+06	2.33648e+06	2.3344e+06	2.30492e+06	1.90299e+06	1.38502e+06	1.56615e+06	2.44786e+06	2.44069e+06	2.59043e+06
46	94.0451	94.045	94.0451	633.448	629.596	638.33	167	36	36	34	9	36	16	1.03558e+07	9.96836e+06	1.02254e+07	1.08739e+07	1.14902e+07	1.26168e+07	6.06905e+06	6.81154e+06	5.83177e+06	1.14019e+07	1.06098e+07	1.11447e+07	1.50019e+07	8.41518e+06	9.01521e+06	1.59214e+07	9.59453e+06	9.70759e+06	1.27097e+07	1.22229e+07	1.25074e+07	1.19716e+07	1.1399e+07	1.1372e+07	5.31428e+06	1.07516e+07	1.05811e+07	1.40238e+07	1.42306e+07	1.4832e+07	1.21515e+07	1.1424e+07	1.16803e+07	1.31611e+07	1.32268e+07	1.32759e+07
47	94.0651	94.0623	94.0726	350.819	349.776	357.865	141	34	21	34	0	36	16	1.60331e+06	1.43291e+06	1.42646e+06	3.07088e+06	3.78888e+06	4.07974e+06	380933	1.62186e+06	1.16197e+06	2.01743e+06	2.18581e+06	2.20326e+06	1.80983e+06	1.97504e+06	2.33541e+06	2.52876e+06	3.15411e+06	3.00773e+06	760762	608180	633031	2.44114e+06	2.38285e+06	2.49411e+06	456475	1.71591e+06	1.44372e+06	2.20688e+06	2.52913e+06	2.55435e+06	981708	953152	966062	2.31257e+06	2.74763e+06	2.51468e+06
48	94.0651	94.0615	94.0739	95.6214	92.1412	96.8968	138	35	18	34	7	28	16	2.22505e+06	2.20533e+06	2.19228e+06	2.98814e+06	3.158e+06	2.99049e+06	2.02094e+06	1.80933e+06	1.76428e+06	2.76453e+06	2.92858e+06	2.92675e+06	3.73811e+06	2.21939e+06	2.30615e+06	3.92277e+06	2.43946e+06	2.50668e+06	1.4029e+06	1.47075e+06	1.31488e+06	1.95837e+06	1.68106e+06	1.75269e+06	1.34511e+06	1.94703e+06	1.80409e+06	2.46509e+06	2.47698e+06	2.27283e+06	1.66594e+06	1.57192e+06	1.58864e+06	2.50743e+06	2.51991e+06	2.533e+06
49	94.9416	94.9273	94.9536	386.677	385.179	387.882	164	35	35	33	9	36	16	939681	1.24882e+06	1.50675e+06	968430	1.28186e+06	1.53184e+06	1.00733e+06	1.15085e+06	1.39211e+06	952735	1.32846e+06	1.53897e+06	1.41879e+06	1.17782e+06	1.33691e+06	1.53904e+06	1.20906e+06	1.39648e+06	1.04022e+06	1.2692e+06	1.27804e+06	1.02276e+06	1.26784e+06	1.62532e+06	896088	1.20545e+06	1.39315e+06	1.05885e+06	1.19461e+06	1.44386e+06	1.00472e+06	1.1404e+06	1.46401e+06	707895	1.087e+06	1.44381e+06
50	95.0437	95.0429	95.0438	633.202	629.867	636.66	91	18	15	21	2	24	11	1.16837e+06	1.09987e+06	1.01611e+06	1.32629e+06	1.26683e+06	1.50778e+06	467306	626999	443282	1.5157e+06	1.28993e+06	1.27061e+06	1.80915e+06	872684	905651	1.97317e+06	1.00253e+06	963060	1.67198e+06	1.45069e+06	1.45511e+06	1.42829e+06	1.32182e+06	1.31367e+06	536037	1.09335e+06	1.18922e+06	1.88373e+06	1.8487e+06	1.83987e+06	1.46354e+06	1.25171e+06	1.51367e+06	1.52468e+06	1.556e+06	1.50408e+06
51	96.0785	96.0726	96.0799	378.813	376.643	380.778	167	36	36	34	9	36	16	3.18364e+06	4.13898e+06	4.10117e+06	3.33669e+06	3.63392e+06	3.66152e+06	2.05083e+06	4.33937e+06	4.09402e+06	2.88423e+06	3.68941e+06	4.09077e+06	4.54033e+06	4.61422e+06	4.97573e+06	4.1974e+06	4.15812e+06	4.83374e+06	4.47861e+06	5.04032e+06	5.83585e+06	4.58604e+06	5.4482e+06	5.82787e+06	2.84304e+06	5.31707e+06	4.89635e+06	3.47949e+06	4.09919e+06	4.25151e+06	4.44369e+06	5.32434e+06	5.67043e+06	3.66687e+06	4.59978e+06	5.0675e+06
52	96.0457	96.0326	96.047	114.222	112.106	114.936	121	36	13	34	9	14	15	3.02735e+06	3.03851e+06	3.00597e+06	3.07457e+06	3.34534e+06	3.39355e+06	1.38794e+06	2.6374e+06	2.30673e+06	3.0557e+06	3.00766e+06	3.06602e+06	3.48239e+06	2.98335e+06	3.22584e+06	3.26469e+06	3.06536e+06	3.14117e+06	2.95075e+06	3.02957e+06	3.02948e+06	3.00791e+06	2.73726e+06	2.88936e+06	1.48285e+06	2.86551e+06	2.80583e+06	2.99964e+06	2.98886e+06	3.11083e+06	2.90165e+06	2.97148e+06	2.97746e+06	2.87286e+06	2.90073e+06	2.97879e+06
53	96.0554	96.0549	96.0567	298.294	281.256	300.857	111	20	19	25	9	23	15	1.99249e+06	2.20106e+06	2.35301e+06	2.04848e+06	2.24698e+06	2.15521e+06	1.1285e+06	2.14177e+06	1.85499e+06	2.09047e+06	2.14401e+06	2.21231e+06	1.29587e+06	2.18512e+06	2.26783e+06	1.18009e+06	2.2211e+06	2.36439e+06	2.4502e+06	2.74179e+06	2.71152e+06	2.51823e+06	2.79594e+06	2.79141e+06	1.51994e+06	2.61913e+06	2.48812e+06	2.60616e+06	2.75544e+06	2.83644e+06	2.45387e+06	2.61285e+06	2.74598e+06	2.52008e+06	2.63978e+06	2.77909e+06
54	96.924	96.9149	96.9251	387.192	385.442	388.145	167	36	36	34	9	36	16	1.64792e+06	2.11131e+06	2.06088e+06	1.85504e+06	1.86218e+06	1.8425e+06	3.19346e+06	1.95802e+06	1.83048e+06	1.63378e+06	1.96017e+06	1.90442e+06	4.2474e+06	1.83516e+06	2.03303e+06	4.31971e+06	1.78749e+06	1.96659e+06	1.6197e+06	1.91525e+06	1.89286e+06	1.70558e+06	1.97856e+06	2.05906e+06	1.91366e+06	1.98607e+06	1.98534e+06	1.69332e+06	1.7506e+06	1.89625e+06	1.95974e+06	1.90277e+06	1.96084e+06	1.88175e+06	1.76554e+06	2.12915e+06
55	97.0397	97.0396	97.0397	278.683	259.661	284.188	167	36	36	34	9	36	16	4.16313e+07	4.29948e+07	4.50368e+07	4.13711e+07	3.51555e+07	2.92054e+07	4.52213e+07	5.0353e+07	5.65668e+07	4.02283e+07	3.96433e+07	3.85185e+07	7.40091e+07	5.41205e+07	4.91026e+07	6.57503e+07	4.446e+07	4.50683e+07	4.13848e+07	4.25809e+07	4.30608e+07	4.70845e+07	4.79196e+07	5.06141e+07	6.19538e+07	5.22314e+07	5.14499e+07	3.66587e+07	3.59673e+07	3.44558e+07	5.34974e+07	4.80788e+07	4.77413e+07	4.76665e+07	4.34547e+07	4.33555e+07
56	97.0397	97.0396	97.0397	225.213	220.519	237.157	160	32	36	34	9	34	15	4.64918e+07	5.22853e+07	5.29705e+07	4.7322e+07	5.91094e+07	6.64784e+07	3.4164e+06	3.38122e+07	2.37754e+07	4.36547e+07	5.11946e+07	5.48542e+07	2.19688e+07	2.94802e+07	4.06436e+07	2.75107e+07	4.64111e+07	4.96134e+07	4.54993e+07	4.88521e+07	5.0757e+07	3.75634e+07	4.20092e+07	4.25449e+07	5.84246e+06	3.29169e+07	3.50954e+07	5.12929e+07	5.73738e+07	6.09008e+07	2.97866e+07	3.92116e+07	4.3001e+07	3.7278e+07	4.58963e+07	4.91839e+07
57	97.9913	97.9913	97.9913	654.798	651.905	659.003	120	23	22	28	8	26	13	7.22729e+06	7.38841e+06	7.44566e+06	7.21966e+06	7.39298e+06	7.93879e+06	9.03318e+06	6.66162e+06	6.67766e+06	7.31504e+06	7.80135e+06	7.9583e+06	1.01867e+07	7.01581e+06	7.36199e+06	1.0222e+07	6.89772e+06	7.24202e+06	7.9359e+06	7.92472e+06	8.11726e+06	8.05124e+06	7.87101e+06	7.82868e+06	6.55862e+06	7.74878e+06	7.728e+06	7.94606e+06	8.35195e+06	8.55361e+06	7.51558e+06	7.8077e+06	8.10128e+06	7.62265e+06	7.9583e+06	8.58467e+06
58	98.0581	98.0572	98.0621	420.479	418.993	421.705	166	35	36	34	9	36	16	3.70108e+06	3.90552e+06	3.7716e+06	3.76451e+06	4.26148e+06	4.70515e+06	1.74616e+06	3.61306e+06	3.00861e+06	3.87853e+06	3.92921e+06	4.20664e+06	3.89175e+06	3.45648e+06	3.83593e+06	4.2342e+06	4.21925e+06	4.50638e+06	1.31092e+07	1.33407e+07	1.34356e+07	1.16332e+07	1.20045e+07	1.19889e+07	4.98439e+06	1.08505e+07	1.07822e+07	1.3706e+07	1.4306e+07	1.46589e+07	1.16182e+07	1.16056e+07	1.23949e+07	1.23586e+07	1.26445e+07	1.27354e+07
59	98.0712	97.9913	98.0723	368.934	367.682	377.465	71	11	14	11	7	20	8	3.13732e+06	3.57959e+06	3.73846e+06	3.13658e+06	3.5749e+06	3.77405e+06	1.54559e+06	2.72044e+06	2.57591e+06	3.06915e+06	3.70171e+06	3.81867e+06	3.18552e+06	2.70283e+06	3.11146e+06	1.69869e+06	3.16599e+06	3.45738e+06	2.8604e+06	3.27805e+06	3.36895e+06	2.7309e+06	2.99146e+06	3.05439e+06	1.92142e+06	2.8856e+06	2.79665e+06	2.99016e+06	3.43293e+06	3.35271e+06	2.44857e+06	2.80273e+06	3.16522e+06	2.51783e+06	3.21516e+06	3.40757e+06
60	98.9752	98.9752	98.9753	654.558	651.935	658.646	166	35	36	34	9	36	16	5.00866e+07	5.20276e+07	5.07344e+07	4.94063e+07	5.36991e+07	5.25292e+07	5.95316e+07	4.39351e+07	4.59272e+07	5.14945e+07	5.35273e+07	5.23753e+07	6.06283e+07	4.87328e+07	5.08125e+07	5.71198e+07	4.88625e+07	5.01831e+07	5.52814e+07	5.66774e+07	5.54875e+07	5.30372e+07	5.54856e+07	5.39415e+07	4.47222e+07	5.38638e+07	5.37972e+07	5.58089e+07	5.94076e+07	5.85835e+07	5.26788e+07	5.51613e+07	5.65072e+07	5.52127e+07	5.81213e+07	5.87187e+07
61	99.0914	99.0909	99.0917	528.353	527.415	529.068	167	36	36	34	9	36	16	1.32382e+07	9.30124e+06	8.80468e+06	1.34366e+07	1.00433e+07	1.01668e+07	5.01285e+06	9.21347e+06	7.13535e+06	1.2402e+07	9.35834e+06	8.76992e+06	1.04237e+07	9.19882e+06	8.21668e+06	1.21273e+07	1.00611e+07	8.82765e+06	1.24238e+07	9.37199e+06	8.91075e+06	1.14592e+07	8.5525e+06	8.08484e+06	6.61524e+06	8.96275e+06	8.07839e+06	1.2083e+07	9.73056e+06	9.25898e+06	1.2865e+07	9.58757e+06	8.62877e+06	1.33226e+07	9.70547e+06	8.81846e+06
62	99.0915	99.0905	99.0921	390.677	387.576	392.531	167	36	36	34	9	36	16	2.87085e+07	2.79947e+07	2.84476e+07	2.88608e+07	2.69565e+07	2.59125e+07	3.41748e+07	2.63337e+07	2.78792e+07	2.78481e+07	2.71219e+07	2.73807e+07	3.25134e+07	2.80464e+07	2.77342e+07	3.1184e+07	2.54227e+07	2.5334e+07	2.75959e+07	2.87892e+07	2.89401e+07	2.79637e+07	2.80636e+07	2.89371e+07	3.04475e+07	2.91022e+07	2.85751e+07	2.61203e+07	2.58089e+07	2.51558e+07	3.06661e+07	2.89222e+07	2.92201e+07	2.85616e+07	2.64818e+07	2.6301e+07
63	99.0913	99.0874	99.0916	326.746	321.477	331.136	167	36	36	34	9	36	16	3.54605e+07	3.45581e+07	3.39356e+07	3.53935e+07	3.41002e+07	3.5602e+07	1.58027e+07	3.0034e+07	2.34838e+07	3.27728e+07	3.25524e+07	3.39883e+07	4.6855e+07	2.99788e+07	3.20986e+07	4.99381e+07	3.57912e+07	3.4704e+07	3.74199e+07	3.69957e+07	3.46658e+07	3.62184e+07	3.60113e+07	3.44034e+07	1.94581e+07	3.39121e+07	3.27633e+07	3.67237e+07	3.63028e+07	3.65315e+07	3.55083e+07	3.53663e+07	3.40535e+07	3.47862e+07	3.65021e+07	3.41907e+07
64	99.0553	99.0553	99.0553	277.406	274.916	283.627	163	33	36	34	9	36	15	2.5329e+07	2.57939e+07	2.60583e+07	2.54605e+07	2.80376e+07	2.97856e+07	3.91554e+06	2.01902e+07	1.56828e+07	2.39623e+07	2.52975e+07	2.61626e+07	1.30029e+07	1.91343e+07	2.26571e+07	1.41131e+07	2.41869e+07	2.49327e+07	2.45207e+07	2.4388e+07	2.41156e+07	2.13952e+07	2.15114e+07	2.19084e+07	5.82255e+06	1.98406e+07	2.00026e+07	2.63569e+07	2.63934e+07	2.7319e+07	1.9647e+07	2.14503e+07	2.22098e+07	2.27368e+07	2.36213e+07	2.39662e+07
65	98.9188	98.9172	99.0553	189.765	180.742	193.544	83	35	1	33	9	0	5	855946	1.02285e+06	992866	944313	961056	952673	1.0058e+07	1.02809e+06	1.09605e+06	897572	943303	1.0065e+06	1.31752e+06	1.0591e+06	1.03586e+06	1.30484e+06	832672	966028	1.00517e+06	1.0376e+06	1.10372e+06	872213	980878	910485	1.0234e+07	1.04144e+06	1.05753e+06	1.04208e+06	1.06127e+06	1.06127e+06	889504	965661	968987	924427	1.0058e+06	1.08079e+06
66	100.039	100.039	100.039	262.317	259.58	265.609	167	36	36	34	9	36	16	1.4319e+07	1.33984e+07	1.29034e+07	1.44127e+07	1.41732e+07	1.38827e+07	9.88379e+06	1.31586e+07	1.26236e+07	1.49715e+07	1.43718e+07	1.39271e+07	1.79171e+07	1.3567e+07	1.34257e+07	1.8179e+07	1.46283e+07	1.42507e+07	1.31987e+07	1.25318e+07	1.2261e+07	1.33604e+07	1.26913e+07	1.26633e+07	1.13687e+07	1.33455e+07	1.32273e+07	1.37562e+07	1.34977e+07	1.35234e+07	1.44995e+07	1.32393e+07	1.26213e+07	1.48603e+07	1.37923e+07	1.34593e+07
67	100.039	100.039	100.039	200.915	198.712	210.618	111	18	24	27	0	30	12	2.26322e+06	2.24932e+06	2.29003e+06	2.2508e+06	2.1611e+06	2.11083e+06	3.8856e+06	2.58127e+06	2.7487e+06	2.5799e+06	2.73672e+06	2.71961e+06	3.18219e+06	2.65714e+06	2.55565e+06	3.04182e+06	2.37969e+06	2.47532e+06	1.98538e+06	1.99554e+06	1.99261e+06	2.11855e+06	2.18172e+06	2.19103e+06	2.88591e+06	2.48054e+06	2.39856e+06	2.19537e+06	2.02728e+06	2.07743e+06	2.10593e+06	2.16542e+06	2.24126e+06	2.15245e+06	2.2336e+06	2.20745e+06
68	101.008	101.005	101.008	633.65	629.053	637.997	161	35	36	33	9	33	15	939938	903569	876184	935550	1.0501e+06	1.11183e+06	268105	555546	466438	955883	989464	962058	871466	714602	795299	974573	874640	940462	1.19447e+06	1.1426e+06	1.17155e+06	1.02007e+06	1.08417e+06	940289	402799	970453	987111	1.21864e+06	1.33366e+06	1.32792e+06	1.21135e+06	1.05406e+06	1.06189e+06	1.30598e+06	1.18792e+06	1.26351e+06
69	102.091	102.036	102.091	393.694	368.118	409.845	192	36	36	36	9	36	16	1.44332e+08	1.42277e+08	1.42542e+08	1.42295e+08	1.34205e+08	1.29146e+08	1.53445e+08	1.31638e+08	1.37304e+08	1.38122e+08	1.34648e+08	1.32369e+08	1.688e+08	1.33002e+08	1.29522e+08	1.67023e+08	1.26354e+08	1.26336e+08	1.31109e+08	1.32665e+08	1.29979e+08	1.37126e+08	1.35024e+08	1.37088e+08	1.50757e+08	1.30436e+08	1.3e+08	1.30049e+08	1.29224e+08	1.26913e+08	1.39916e+08	1.29195e+08	1.29411e+08	1.32821e+08	1.25158e+08	1.22638e+08
70	102.091	102.089	102.091	528.53	527.415	529.141	167	36	36	34	9	36	16	4.30222e+07	3.36581e+07	3.04003e+07	4.23887e+07	3.39914e+07	3.2847e+07	1.6367e+07	3.1947e+07	2.57369e+07	4.08925e+07	3.14811e+07	3.02816e+07	3.04992e+07	3.15617e+07	2.89233e+07	3.39637e+07	3.55596e+07	3.04723e+07	4.07895e+07	3.23642e+07	3.05742e+07	3.92699e+07	3.09578e+07	2.90598e+07	2.25116e+07	3.23753e+07	2.84264e+07	4.03478e+07	3.22164e+07	3.07299e+07	3.92046e+07	3.32999e+07	3.06307e+07	4.0777e+07	3.36622e+07	3.09986e+07
71	102.07	102.068	102.079	430.446	428.918	431.499	164	34	36	34	9	36	15	7.41376e+07	7.08744e+07	6.9598e+07	7.3788e+07	7.87527e+07	8.59815e+07	6.31717e+07	5.81251e+07	4.44059e+07	6.95831e+07	6.96813e+07	6.93024e+07	8.94118e+07	5.6215e+07	6.34076e+07	9.44135e+07	6.99075e+07	7.08591e+07	8.27288e+07	8.13218e+07	8.33803e+07	7.67116e+07	7.58271e+07	7.6144e+07	4.36392e+07	6.67828e+07	6.693e+07	8.16473e+07	8.62022e+07	8.82283e+07	7.38087e+07	7.31402e+07	7.51961e+07	7.69325e+07	7.51104e+07	7.84656e+07
72	102.034	102.034	102.034	654.539	651.648	657.926	104	25	11	28	8	21	11	7.80867e+06	7.63496e+06	7.70482e+06	7.85189e+06	8.08451e+06	7.96302e+06	1.36068e+07	6.92844e+06	6.55274e+06	8.61422e+06	8.08452e+06	8.37972e+06	1.54376e+07	7.51572e+06	7.49925e+06	1.49605e+07	7.53064e+06	7.58187e+06	8.89312e+06	8.05801e+06	8.69644e+06	8.27417e+06	8.17805e+06	8.11944e+06	6.9879e+06	8.25926e+06	8.38558e+06	8.75676e+06	8.9394e+06	8.95132e+06	7.97814e+06	8.48615e+06	8.48997e+06	8.40786e+06	8.81749e+06	8.91321e+06
73	103.095	103.092	103.096	394.406	393.618	395.198	167	36	36	34	9	36	16	7.25832e+06	7.27176e+06	7.16925e+06	7.08536e+06	6.60304e+06	6.40834e+06	7.50574e+06	6.7153e+06	6.81143e+06	6.96158e+06	6.55676e+06	6.79167e+06	8.45403e+06	6.62852e+06	6.57659e+06	8.53873e+06	6.11498e+06	6.22027e+06	6.50216e+06	6.62632e+06	6.33111e+06	6.84081e+06	6.70218e+06	6.81503e+06	7.63067e+06	6.49866e+06	6.47284e+06	6.48421e+06	6.29794e+06	6.39079e+06	6.95954e+06	6.42275e+06	6.41031e+06	6.56996e+06	6.28765e+06	6.07142e+06
74	103.054	103.054	103.055	341.906	341.312	348.955	167	36	36	34	9	36	16	3.30019e+07	3.33424e+07	3.2062e+07	3.31315e+07	3.63895e+07	3.96257e+07	9.44575e+06	2.77691e+07	2.30143e+07	3.06995e+07	3.2375e+07	3.17574e+07	2.99081e+07	2.73344e+07	3.18093e+07	3.28235e+07	3.52412e+07	3.60046e+07	3.52833e+07	3.39893e+07	3.44998e+07	3.33957e+07	3.39837e+07	3.37821e+07	1.40127e+07	3.12628e+07	2.91102e+07	3.59688e+07	3.79287e+07	3.84439e+07	3.12541e+07	3.25899e+07	3.27464e+07	3.43588e+07	3.4993e+07	3.63389e+07
75	103.076	103.073	103.088	430.229	428.918	431.19	119	24	25	22	9	26	13	3.26355e+06	3.13843e+06	3.14798e+06	3.16742e+06	3.43132e+06	3.65544e+06	2.89428e+06	2.64846e+06	2.40134e+06	2.99383e+06	2.92336e+06	3.06237e+06	4.12578e+06	2.73066e+06	2.86933e+06	4.0542e+06	2.97286e+06	3.13742e+06	3.47997e+06	3.35548e+06	3.46044e+06	3.1564e+06	3.32088e+06	3.31256e+06	2.11112e+06	2.8844e+06	2.88143e+06	3.53366e+06	3.7413e+06	3.64967e+06	3.16438e+06	3.13015e+06	3.18255e+06	3.32693e+06	3.11319e+06	3.38056e+06
76	103.956	103.955	103.961	500.374	496.101	502.398	139	27	33	30	4	31	14	595032	562955	418683	547776	478374	462415	954560	443236	375314	535391	476144	424003	2.50563e+06	377465	473909	1.57387e+06	632584	532881	515078	443616	273296	595564	1.09493e+06	446991	464860	497840	589428	528115	497288	436333	617390	635853	450527	551456	491348	423549
77	104.054	104.054	104.056	371.363	370.83	374.292	165	35	36	34	9	36	15	1.72522e+08	1.67889e+08	1.4765e+08	1.69639e+08	1.81583e+08	1.88861e+08	3.96451e+07	1.41228e+08	9.91234e+07	1.42319e+08	1.48174e+08	1.43687e+08	1.92029e+08	1.35924e+08	1.47644e+08	2.2619e+08	1.95106e+08	1.84936e+08	2.03657e+08	1.90876e+08	1.88658e+08	1.94241e+08	1.8618e+08	1.76966e+08	4.3386e+07	1.69607e+08	1.38333e+08	2.05668e+08	2.09106e+08	2.03087e+08	1.91562e+08	1.76892e+08	1.67933e+08	1.96269e+08	1.87821e+08	1.78609e+08
78	104.107	104.105	104.107	309.948	301.967	327.19	169	36	36	36	9	36	16	2.7576e+09	2.65329e+09	2.59164e+09	2.64347e+09	2.89779e+09	3.14781e+09	9.8941e+08	1.85587e+09	1.62137e+09	2.49197e+09	2.51976e+09	2.50945e+09	2.0664e+09	1.83195e+09	1.97585e+09	2.24518e+09	2.15413e+09	2.17674e+09	2.31588e+09	2.23767e+09	2.23858e+09	2.08917e+09	2.07061e+09	2.06693e+09	1.12126e+09	1.80501e+09	1.7783e+09	2.41516e+09	2.44677e+09	2.49499e+09	1.94139e+09	1.92324e+09	1.92573e+09	2.10175e+09	2.04486e+09	2.05535e+09
79	104.045	104.038	104.045	195.799	193.104	199.5	128	33	20	33	9	19	14	1.10817e+06	1.13493e+06	1.24721e+06	1.14425e+06	1.18121e+06	1.21375e+06	1.49981e+06	1.11339e+06	1.21512e+06	1.11509e+06	1.27913e+06	1.29028e+06	1.45816e+06	1.18651e+06	1.276e+06	1.39469e+06	1.25446e+06	1.18808e+06	1.16409e+06	1.21977e+06	1.27054e+06	1.28443e+06	1.2925e+06	1.34149e+06	1.33545e+06	1.26707e+06	1.29355e+06	1.17877e+06	1.16297e+06	1.28016e+06	1.14606e+06	1.15125e+06	1.21557e+06	1.06043e+06	1.22825e+06	1.29711e+06
80	104.992	104.992	104.992	406.976	406.616	416.077	169	36	36	36	9	36	16	5.49874e+09	5.46147e+09	5.47748e+09	5.48871e+09	5.67307e+09	5.88539e+09	3.50322e+09	5.22798e+09	4.82286e+09	5.42793e+09	5.51534e+09	5.61371e+09	5.65912e+09	5.09739e+09	5.35106e+09	5.88029e+09	5.55006e+09	5.59681e+09	5.68415e+09	5.65685e+09	5.64434e+09	5.46243e+09	5.49708e+09	5.46658e+09	3.74983e+09	5.22745e+09	5.25374e+09	5.74511e+09	5.82378e+09	5.91492e+09	5.26382e+09	5.40356e+09	5.45079e+09	5.43748e+09	5.5723e+09	5.61991e+09
81	105.11	105.11	105.11	309.792	301.967	325.681	167	36	36	34	9	36	16	1.54379e+08	1.4759e+08	1.44762e+08	1.47356e+08	1.61912e+08	1.76403e+08	5.44797e+07	1.03303e+08	9.05033e+07	1.38666e+08	1.40986e+08	1.4052e+08	1.14804e+08	1.0267e+08	1.10035e+08	1.24743e+08	1.19701e+08	1.21678e+08	1.29762e+08	1.26309e+08	1.24936e+08	1.17586e+08	1.1638e+08	1.16723e+08	6.20508e+07	1.00927e+08	9.98005e+07	1.3609e+08	1.37185e+08	1.39865e+08	1.08486e+08	1.07676e+08	1.07436e+08	1.18143e+08	1.14319e+08	1.15297e+08
82	105.997	105.996	105.997	406.632	406.066	416.077	169	36	36	36	9	36	16	1.11597e+08	1.11562e+08	1.1162e+08	1.11072e+08	1.15987e+08	1.17302e+08	7.32438e+07	1.07205e+08	9.7005e+07	1.10505e+08	1.12455e+08	1.12819e+08	1.18381e+08	1.02175e+08	1.06606e+08	1.1896e+08	1.1205e+08	1.1436e+08	1.15325e+08	1.13317e+08	1.12609e+08	1.11117e+08	1.09381e+08	1.11296e+08	7.83396e+07	1.06562e+08	1.05107e+08	1.16811e+08	1.1679e+08	1.20168e+08	1.08257e+08	1.1123e+08	1.08966e+08	1.10043e+08	1.14056e+08	1.13367e+08
83	106.049	106.046	106.049	449.803	446.176	452.581	167	36	36	34	9	36	16	4.96248e+07	4.86954e+07	4.79599e+07	5.89169e+07	6.4974e+07	7.30091e+07	1.40332e+07	6.04114e+07	4.63744e+07	2.4362e+07	2.53099e+07	2.61472e+07	6.73509e+07	6.02967e+07	6.94012e+07	6.60471e+07	6.78482e+07	6.80803e+07	1.09203e+08	1.05936e+08	1.03899e+08	9.32962e+07	9.15171e+07	8.97235e+07	2.7106e+07	8.09374e+07	7.98892e+07	8.12935e+07	8.12922e+07	8.48814e+07	9.42829e+07	9.8691e+07	9.89645e+07	9.27988e+07	9.66243e+07	9.63704e+07
84	106.111	106.106	106.111	309.948	301.967	324.881	167	36	36	34	9	36	16	5.79535e+06	5.48906e+06	5.56577e+06	5.65098e+06	6.26072e+06	6.75399e+06	2.43785e+06	3.98229e+06	3.35517e+06	5.48667e+06	5.30987e+06	5.32255e+06	4.50229e+06	3.91269e+06	4.13079e+06	4.69953e+06	4.60072e+06	4.52677e+06	4.94874e+06	4.67841e+06	4.79521e+06	4.47037e+06	4.45036e+06	4.53408e+06	2.41455e+06	3.76159e+06	3.73385e+06	5.08536e+06	5.22692e+06	5.40877e+06	4.05087e+06	4.05942e+06	4.02872e+06	4.33461e+06	4.32665e+06	4.38258e+06
85	106.996	106.996	106.997	406.976	406.616	416.077	169	36	36	36	9	36	16	2.12147e+07	2.19392e+07	2.15461e+07	2.09068e+07	2.31701e+07	2.27461e+07	1.43406e+07	2.11271e+07	1.91923e+07	2.05555e+07	2.15662e+07	2.23253e+07	2.20117e+07	2.00138e+07	2.13899e+07	2.30566e+07	2.23692e+07	2.07367e+07	2.19376e+07	2.17737e+07	2.29382e+07	2.2174e+07	2.11725e+07	2.15655e+07	1.45387e+07	2.04555e+07	2.04147e+07	2.33097e+07	2.29187e+07	2.24888e+07	2.08521e+07	2.07143e+07	2.17158e+07	2.17591e+07	2.21637e+07	2.1559e+07
86	107.049	107.049	107.05	114.9	112.205	119.717	169	36	36	36	9	36	16	4.17087e+07	4.36052e+07	4.30169e+07	4.29143e+07	4.25432e+07	4.23038e+07	7.84367e+07	4.61041e+07	5.0263e+07	4.49649e+07	4.43731e+07	4.57178e+07	8.14497e+07	4.78551e+07	4.81573e+07	7.61424e+07	4.29815e+07	4.52532e+07	4.33429e+07	4.56287e+07	4.5151e+07	4.33565e+07	4.20338e+07	4.36981e+07	4.82987e+07	4.66136e+07	4.77828e+07	4.02569e+07	4.26643e+07	4.24607e+07	4.52355e+07	4.67337e+07	4.52921e+07	4.269e+07	4.60546e+07	4.33093e+07
87	107.049	107.049	107.049	340.329	335.189	347.531	167	36	36	34	9	36	16	1.05169e+07	1.01812e+07	1.0164e+07	1.05812e+07	1.08554e+07	1.12273e+07	5.52317e+06	9.13242e+06	8.38456e+06	9.56764e+06	1.00845e+07	1.05188e+07	8.76533e+06	8.90055e+06	1.00791e+07	1.00848e+07	1.10459e+07	1.07401e+07	1.03678e+07	1.10435e+07	1.10437e+07	1.04647e+07	1.10001e+07	1.10916e+07	6.71497e+06	1.01063e+07	9.70378e+06	1.11016e+07	1.13518e+07	1.17734e+07	1.03192e+07	1.07439e+07	1.0266e+07	1.05983e+07	1.07982e+07	1.10018e+07
88	107.055	107.054	107.06	448.93	445.929	451.072	150	32	33	33	9	28	15	1.71618e+06	1.65195e+06	1.66406e+06	1.93016e+06	2.1258e+06	2.35168e+06	619197	1.96434e+06	1.61331e+06	862236	942045	1.00709e+06	2.14348e+06	1.9809e+06	2.37097e+06	2.11312e+06	2.25403e+06	2.23343e+06	3.53985e+06	3.35235e+06	3.3837e+06	3.05047e+06	2.9547e+06	2.90818e+06	1.02471e+06	2.65213e+06	2.67701e+06	2.59189e+06	2.71389e+06	2.78849e+06	2.98861e+06	3.17778e+06	3.12527e+06	2.88487e+06	3.11704e+06	3.10333e+06
89	107.07	107.07	107.074	70.1052	66.4404	71.4741	112	9	36	12	3	36	16	2.02043e+06	2.02561e+06	1.94126e+06	1.5229e+06	1.80181e+06	1.94206e+06	300955	547559	524368	740753	766880	762120	317890	380061	420877	374655	470615	587647	551745	509458	533972	798596	716508	799561	389286	462704	567593	587489	654867	674410	264590	364587	251504	1.36848e+06	1.53202e+06	1.63922e+06
90	108.056	108.056	108.056	281.215	258.061	296.731	169	36	36	36	9	36	16	6.90203e+07	6.13267e+07	5.89631e+07	6.99951e+07	5.51643e+07	4.63338e+07	1.95296e+08	8.3584e+07	8.3958e+07	7.19021e+07	6.0136e+07	5.40187e+07	1.68435e+08	8.90902e+07	7.65228e+07	1.52206e+08	7.56182e+07	7.01467e+07	6.82415e+07	6.24786e+07	6.12224e+07	7.86177e+07	7.28444e+07	7.2909e+07	1.58112e+08	8.62979e+07	8.11766e+07	5.99222e+07	5.46294e+07	5.11617e+07	1.00402e+08	7.72057e+07	7.13357e+07	8.91158e+07	6.94683e+07	6.4402e+07
91	108.056	108.056	108.056	206.055	202.067	227.904	165	34	36	34	9	36	16	2.03461e+08	1.9539e+08	1.96283e+08	1.99865e+08	2.1566e+08	2.39281e+08	1.56765e+06	1.48443e+08	1.07124e+08	1.89196e+08	1.90486e+08	1.9757e+08	1.08852e+08	1.35837e+08	1.60252e+08	1.45835e+08	1.82929e+08	1.82661e+08	1.96771e+08	1.84122e+08	1.8047e+08	1.69086e+08	1.66638e+08	1.61953e+08	1.14479e+07	1.45908e+08	1.44033e+08	2.00583e+08	2.01158e+08	2.05243e+08	1.52628e+08	1.66258e+08	1.64697e+08	1.82203e+08	1.82417e+08	1.80823e+08
92	109.059	109.039	109.059	205.908	202.601	239.666	122	28	27	28	7	23	9	2.12071e+07	2.414e+07	1.16238e+07	1.11359e+07	1.2957e+07	1.47168e+07	3.31037e+06	8.59429e+06	6.71295e+06	1.12208e+07	1.22484e+07	1.15801e+07	4.98977e+06	8.1592e+06	9.45307e+06	5.86001e+06	1.09861e+07	1.06788e+07	1.15953e+07	1.0886e+07	1.02842e+07	9.57446e+06	9.51384e+06	2.26635e+07	3.0456e+06	8.53456e+06	8.4649e+06	1.20249e+07	1.19477e+07	1.24464e+07	6.79859e+06	2.08936e+07	2.17545e+07	8.3579e+06	1.06029e+07	1.06122e+07
93	109.04	109.04	109.059	283.604	253.943	290.045	114	21	27	21	2	27	16	1.02386e+07	1.0362e+07	1.0066e+07	2.13992e+07	8.96335e+06	8.15745e+06	1.04482e+07	9.02788e+06	1.26343e+07	9.47074e+06	9.4866e+06	8.31829e+06	1.20563e+07	8.79515e+06	9.48504e+06	1.53116e+07	1.05152e+07	1.03358e+07	9.50345e+06	9.22842e+06	9.4176e+06	9.6064e+06	9.95788e+06	1.00529e+07	1.00606e+07	9.466e+06	9.4432e+06	9.02859e+06	9.01652e+06	8.86361e+06	1.86223e+07	9.65347e+06	9.59823e+06	1.95967e+07	9.68517e+06	9.84924e+06
94	110.071	110.071	110.071	256.293	248.557	260.485	164	34	36	34	9	36	15	5.7316e+07	5.74048e+07	5.58458e+07	5.56591e+07	6.32673e+07	7.04825e+07	1.44656e+07	4.30848e+07	3.34686e+07	5.1666e+07	5.41622e+07	5.58095e+07	3.30983e+07	3.94289e+07	4.70195e+07	4.15264e+07	5.3497e+07	5.57e+07	5.71923e+07	5.62539e+07	5.73703e+07	4.90932e+07	5.20327e+07	5.1244e+07	1.66959e+07	4.34006e+07	4.33386e+07	6.06925e+07	6.45074e+07	6.90943e+07	4.57691e+07	4.82921e+07	5.03586e+07	5.40998e+07	5.52173e+07	5.59122e+07
95	110.035	110.033	110.035	207.546	207.07	207.988	138	33	31	26	6	28	14	3.37931e+06	3.4766e+06	3.52098e+06	2.88427e+06	2.96042e+06	3.33249e+06	346695	1.25561e+06	1.04081e+06	2.35364e+06	2.73301e+06	2.72274e+06	1.4549e+06	1.47638e+06	1.68053e+06	1.40115e+06	1.43387e+06	1.57812e+06	1.81025e+06	1.86393e+06	1.85761e+06	1.3726e+06	1.44884e+06	1.3632e+06	566923	1.48357e+06	1.34254e+06	1.9351e+06	2.13368e+06	2.13562e+06	1.34736e+06	1.49938e+06	1.63798e+06	1.64033e+06	1.6635e+06	1.82974e+06
96	110.071	110.07	110.071	516.82	506.769	529.393	148	28	36	29	5	35	15	3.08507e+07	3.23418e+07	3.30229e+07	3.32386e+07	4.08007e+07	4.2258e+07	1.03354e+07	2.71293e+07	2.09513e+07	2.94014e+07	3.27546e+07	3.42768e+07	2.06672e+07	2.6428e+07	3.05339e+07	2.27685e+07	3.23686e+07	3.29296e+07	3.70536e+07	3.54129e+07	3.53398e+07	2.98489e+07	2.84169e+07	2.82215e+07	1.20066e+07	2.63656e+07	2.50161e+07	3.68341e+07	3.87315e+07	3.67058e+07	2.34782e+07	3.12419e+07	3.0341e+07	2.74859e+07	3.64538e+07	3.56293e+07
97	111.055	111.055	111.055	238.981	235.584	288.821	168	36	36	34	9	36	16	5.64563e+09	5.78181e+09	5.68584e+09	5.53639e+09	6.10374e+09	4.4257e+09	1.24903e+09	4.38512e+09	3.37165e+09	5.08237e+09	5.37134e+09	5.50027e+09	4.11794e+09	4.24769e+09	4.89039e+09	4.62567e+09	5.44486e+09	5.63918e+09	5.35515e+09	5.44561e+09	5.52418e+09	4.99293e+09	5.17181e+09	5.21757e+09	1.93198e+09	4.58966e+09	4.62247e+09	5.67137e+09	6.03147e+09	6.22564e+09	4.84474e+09	4.92464e+09	5.08477e+09	5.24873e+09	5.39748e+09	5.51131e+09
98	111.039	111.039	111.039	654.473	651.625	658.915	147	31	27	34	9	31	15	8.3559e+06	8.76544e+06	8.63742e+06	8.50634e+06	8.71808e+06	9.11465e+06	1.44453e+07	7.57997e+06	7.17346e+06	9.01354e+06	8.74049e+06	8.45809e+06	1.4959e+07	8.25398e+06	8.51149e+06	1.56748e+07	8.58939e+06	8.05291e+06	9.74151e+06	9.84777e+06	9.58305e+06	8.81205e+06	9.16742e+06	9.30563e+06	7.16399e+06	9.18981e+06	9.44515e+06	1.01893e+07	1.00528e+07	9.90471e+06	8.55936e+06	9.50026e+06	9.10818e+06	9.64724e+06	9.57501e+06	1.02913e+07
99	111.028	111.022	111.038	376.316	350.724	377.653	27	11	5	1	9	1	0	3.63011e+06	3.67287e+06	4.18524e+06	3.79386e+06	3.1596e+06	3.2217e+06	5.73411e+06	5.52726e+06	3.46891e+06	2.99928e+06	2.94321e+06	2.7784e+06	7.32679e+06	5.93368e+06	6.021e+06	5.65528e+06	4.41059e+06	5.37046e+06	6.25823e+06	6.83591e+06	7.09295e+06	7.02605e+06	6.92422e+06	4.41625e+06	6.24887e+06	4.34951e+06	7.02225e+06	4.65025e+06	4.70042e+06	4.63903e+06	7.20186e+06	6.9474e+06	7.90552e+06	4.93115e+06	5.18817e+06	6.06524e+06
100	112.059	112.057	112.059	239.074	234.508	253.675	141	32	30	27	9	29	14	3.28397e+08	3.32712e+08	3.25242e+08	3.21588e+08	3.51878e+08	2.54291e+08	4.58403e+07	2.47487e+08	1.90054e+08	2.93046e+08	3.07714e+08	3.1556e+08	2.39293e+08	2.3482e+08	2.75218e+08	2.75241e+08	3.11241e+08	3.22075e+08	3.09924e+08	3.12175e+08	3.15246e+08	2.87008e+08	2.96995e+08	2.98313e+08	9.23764e+07	2.52504e+08	2.5304e+08	3.28087e+08	3.47818e+08	3.59098e+08	2.72479e+08	2.76229e+08	2.83041e+08	2.98159e+08	3.01345e+08	3.08567e+08
101	112.082	111.984	112.085	344.329	313.718	363.588	111	20	28	23	1	24	12	4.48736e+07	4.34067e+07	4.291e+07	4.37858e+07	4.35754e+07	4.36039e+07	1.88146e+07	3.99681e+07	3.59952e+07	4.0619e+07	4.15578e+07	4.20662e+07	4.62e+07	3.83266e+07	3.97211e+07	5.06051e+07	4.12203e+07	4.1653e+07	4.26632e+07	4.25371e+07	4.1249e+07	4.14459e+07	4.1391e+07	3.95042e+07	2.58027e+07	4.11098e+07	4.088e+06	4.21676e+07	4.10868e+07	4.2256e+07	4.38824e+07	4.19044e+07	3.91149e+07	4.29729e+07	4.19937e+07	3.82361e+07
102	112.087	112.087	112.087	394.454	393.646	395.546	167	36	36	34	9	36	16	1.18077e+08	1.15184e+08	1.14259e+08	1.17293e+08	1.12712e+08	1.11158e+08	9.25846e+07	1.08198e+08	1.07809e+08	1.11612e+08	1.09131e+08	1.08865e+08	1.32049e+08	1.08236e+08	1.12318e+08	1.35184e+08	1.11983e+08	1.13003e+08	1.11493e+08	1.12925e+08	1.11928e+08	1.12987e+08	1.10632e+08	1.13792e+08	1.01829e+08	1.11316e+08	1.11697e+08	1.11821e+08	1.10831e+08	1.11243e+08	1.26697e+08	1.12249e+08	1.1367e+08	1.23942e+08	1.11053e+08	1.10144e+08
103	112.902	112.899	112.91	385.437	384.422	386.536	167	36	36	34	9	36	16	7.1297e+06	9.13486e+06	8.07763e+06	7.21424e+06	8.65693e+06	9.78352e+06	3.29586e+06	7.24989e+06	5.83491e+06	6.95658e+06	8.39106e+06	8.91262e+06	7.394e+06	6.95769e+06	7.91584e+06	8.34695e+06	1.00937e+07	9.10277e+06	6.89065e+06	7.79565e+06	8.66584e+06	6.9137e+06	8.00074e+06	8.3974e+06	3.65784e+06	7.66011e+06	7.70362e+06	8.3679e+06	9.39031e+06	1.0129e+07	6.61507e+06	7.76913e+06	7.68262e+06	6.6009e+06	9.14034e+06	8.42736e+06
104	113.107	113.107	113.107	436.918	428.612	439.305	169	36	36	36	9	36	16	1.1531e+08	1.21985e+08	1.25287e+08	1.17432e+08	1.21041e+08	1.19713e+08	8.48535e+07	1.27719e+08	1.34146e+08	1.21213e+08	1.2673e+08	1.26958e+08	7.2541e+07	1.30058e+08	1.26454e+08	7.11183e+07	1.20609e+08	1.19688e+08	1.17668e+08	1.2078e+08	1.22247e+08	1.18555e+08	1.2092e+08	1.22269e+08	1.23054e+08	1.24548e+08	1.24267e+08	1.17437e+08	1.1951e+08	1.18818e+08	1.07963e+08	1.23993e+08	1.2294e+08	1.08604e+08	1.20843e+08	1.21385e+08
105	113.035	113.035	113.038	207.483	206.711	207.828	167	36	36	34	9	36	16	1.11229e+08	1.13589e+08	1.11911e+08	2.20967e+07	2.37602e+07	2.48277e+07	2.21223e+07	5.55993e+07	4.91611e+07	6.91526e+07	7.29844e+07	7.29048e+07	5.60216e+07	5.15495e+07	5.852e+07	5.21163e+07	5.35876e+07	5.43091e+07	6.43597e+07	6.5793e+07	6.31766e+07	6.87461e+06	7.23916e+06	7.08474e+06	1.78038e+07	3.66524e+07	3.61028e+07	6.12904e+07	6.42449e+07	6.48339e+07	3.76319e+07	3.93392e+07	4.0384e+07	3.47655e+07	3.58315e+07	3.68584e+07
106	113.06	113.059	113.062	68.0532	65.1637	68.8002	44	17	0	18	6	3	0	3.06434e+07	2.93685e+07	2.77822e+07	4.99514e+07	5.19451e+07	5.27971e+07	6.75996e+06	1.37125e+07	1.13478e+07	2.35108e+07	2.37346e+07	2.32936e+07	1.43644e+07	1.2866e+07	1.29425e+07	8.79975e+06	8.2914e+06	8.26103e+06	1.53853e+07	1.49754e+07	1.41074e+07	9.1456e+06	9.08425e+06	8.822e+06	6.60905e+06	1.09998e+07	1.07018e+07	2.16409e+07	2.12008e+07	2.03188e+07	9.45793e+06	9.48772e+06	9.15944e+06	3.61824e+07	3.52585e+07	3.30274e+07
107	114.066	114.066	114.072	217.899	217.367	218.43	169	36	36	36	9	36	16	3.04158e+09	3.00598e+09	2.94382e+09	3.02865e+09	3.26729e+09	3.48276e+09	9.62503e+08	2.45152e+09	2.05335e+09	2.94514e+09	2.982e+09	3.04949e+09	2.60154e+09	2.42739e+09	2.69975e+09	2.86903e+09	2.97555e+09	2.97361e+09	3.17821e+09	3.09938e+09	3.07947e+09	2.89966e+09	2.88872e+09	2.86875e+09	1.31132e+09	2.68131e+09	2.64049e+09	3.26842e+09	3.33643e+09	3.43779e+09	2.79868e+09	2.85624e+09	2.85764e+09	3.00225e+09	3.03772e+09	3.06004e+09
108	114.037	113.967	114.037	362.961	356.535	373.036	150	34	32	34	2	33	15	2.48401e+06	2.42869e+06	2.37771e+06	2.51313e+06	2.70215e+06	3.20393e+06	410136	1.93776e+06	1.46609e+06	2.27882e+06	2.38559e+06	2.50238e+06	2.65685e+06	1.88751e+06	2.30189e+06	2.45358e+06	2.8538e+06	3.10021e+06	3.01144e+06	2.73115e+06	2.8404e+06	2.49329e+06	2.60514e+06	2.39032e+06	715138	2.21402e+06	6.25731e+06	2.73324e+06	2.86776e+06	3.04761e+06	2.36288e+06	2.46876e+06	2.34942e+06	2.77755e+06	2.69408e+06	2.81276e+06
109	114.037	114.031	114.037	115.184	79.9576	119.1	143	36	21	34	9	26	16	3.93902e+06	3.50258e+06	3.50711e+06	4.17803e+06	3.99726e+06	4.5275e+06	3.57228e+06	6.23086e+06	4.85079e+06	3.93564e+06	3.85337e+06	4.06155e+06	8.07447e+06	6.60708e+06	7.02912e+06	7.78687e+06	7.25899e+06	6.96637e+06	1.31306e+07	1.13684e+07	1.34665e+07	1.39914e+07	1.28795e+07	1.12428e+07	8.20613e+06	1.35716e+07	1.31944e+07	1.52652e+07	1.4048e+07	1.30627e+07	1.52368e+07	1.32311e+07	1.30569e+07	1.70812e+07	1.51702e+07	1.50679e+07
110	114.558	114.558	114.56	633.38	629.596	638.22	139	32	24	32	9	27	15	1.06271e+06	850671	844374	1.21931e+06	1.13186e+06	1.23626e+06	527373	492076	378164	1.18401e+06	890862	1.08845e+06	2.1401e+06	787925	796094	2.1577e+06	1.04857e+06	877321	1.37611e+06	1.27654e+06	1.22732e+06	1.32549e+06	1.07581e+06	1.13038e+06	417607	969369	989598	1.57165e+06	1.56718e+06	1.59004e+06	1.3681e+06	1.272e+06	1.21743e+06	1.42953e+06	1.20866e+06	1.2969e+06
111	115.069	115.069	115.07	217.92	217.367	218.43	167	36	36	34	9	36	16	1.37678e+08	1.36399e+08	1.32995e+08	1.37601e+08	1.46505e+08	1.56283e+08	4.35245e+07	1.10583e+08	9.29208e+07	1.33959e+08	1.35391e+08	1.37903e+08	1.17865e+08	1.10271e+08	1.22685e+08	1.30743e+08	1.34717e+08	1.35107e+08	1.46054e+08	1.42492e+08	1.40561e+08	1.33491e+08	1.32183e+08	1.32404e+08	6.05428e+07	1.23168e+08	1.20375e+08	1.49846e+08	1.53871e+08	1.58041e+08	1.28411e+08	1.30736e+08	1.29547e+08	1.38531e+08	1.40497e+08	1.40036e+08
112	115.087	115.086	115.087	532.374	531.779	533.073	167	36	36	34	9	36	16	2.60473e+07	2.57681e+07	2.53083e+07	2.72338e+07	3.03349e+07	3.4111e+07	7.65447e+06	2.7767e+07	2.04984e+07	2.5434e+07	2.59923e+07	2.67066e+07	2.40676e+07	2.57486e+07	2.8729e+07	2.9873e+07	3.51105e+07	3.44397e+07	3.61477e+07	3.50764e+07	3.49269e+07	3.10592e+07	2.99624e+07	2.92245e+07	1.03758e+07	3.11496e+07	2.9766e+07	3.95452e+07	3.93796e+07	4.10454e+07	3.01702e+07	3.3761e+07	3.30054e+07	3.78616e+07	4.04742e+07	4.00806e+07
113	115.085	115.079	115.087	371.673	367.303	376.666	167	36	36	34	9	36	16	3.24524e+07	3.73716e+07	3.63164e+07	3.53451e+07	4.15983e+07	4.71419e+07	1.80839e+07	3.47459e+07	2.85202e+07	2.93865e+07	3.31234e+07	3.60139e+07	3.68418e+07	3.24293e+07	3.7141e+07	4.13354e+07	4.65172e+07	4.88231e+07	4.63362e+07	4.96725e+07	5.54112e+07	4.38371e+07	4.74636e+07	5.12846e+07	1.86649e+07	4.72183e+07	4.52337e+07	4.70979e+07	5.35613e+07	5.92006e+07	4.2031e+07	4.52105e+07	4.85687e+07	4.61281e+07	5.2258e+07	5.43532e+07
114	116.071	116.071	116.072	380.531	378.319	383.125	169	36	36	36	9	36	16	3.81565e+08	6.76155e+08	9.57243e+08	3.9137e+08	4.44416e+08	3.74138e+08	5.37765e+08	8.79856e+08	1.16055e+09	4.87658e+08	7.28984e+08	8.61468e+08	8.70644e+08	1.01174e+09	1.17359e+09	5.47942e+08	7.31728e+08	9.67582e+08	2.4199e+08	4.09023e+08	5.8259e+08	4.61855e+08	6.75736e+08	8.81474e+08	4.98006e+08	9.72821e+08	1.06927e+09	2.66013e+08	3.67651e+08	3.69211e+08	3.04896e+08	5.25596e+08	6.6098e+08	2.76642e+08	5.17863e+08	7.37523e+08
115	116.071	116.07	116.071	531.677	530.496	532.516	167	36	36	34	9	36	16	1.08674e+08	1.09094e+08	1.08327e+08	1.14059e+08	1.28665e+08	1.42431e+08	3.04569e+07	1.152e+08	8.63372e+07	1.05292e+08	1.10519e+08	1.15465e+08	1.008e+08	1.04876e+08	1.19801e+08	1.21893e+08	1.42622e+08	1.43047e+08	1.46181e+08	1.42088e+08	1.41012e+08	1.25819e+08	1.22238e+08	1.20954e+08	4.08071e+07	1.26497e+08	1.22352e+08	1.56653e+08	1.62878e+08	1.65721e+08	1.22685e+08	1.36436e+08	1.34509e+08	1.5016e+08	1.61647e+08	1.6004e+08
116	116.044	116.033	116.045	248.87	247.399	249.639	166	35	36	34	9	36	16	4.68387e+06	4.86214e+06	4.95129e+06	4.90731e+06	5.28771e+06	5.45061e+06	421712	4.45673e+06	4.14108e+06	4.68921e+06	5.05147e+06	5.10914e+06	4.67262e+06	4.47705e+06	4.71392e+06	4.93158e+06	4.81608e+06	5.01276e+06	3.93205e+06	4.08905e+06	4.30476e+06	3.6699e+06	3.80951e+06	3.90453e+06	719813	3.68455e+06	3.7179e+06	4.07519e+06	4.32928e+06	4.35068e+06	3.53108e+06	3.67941e+06	4.12264e+06	3.78692e+06	4.15363e+06	4.37799e+06
117	117.074	117.074	117.075	380.528	378.319	383.125	167	36	36	34	9	36	16	1.97112e+07	3.58883e+07	5.09548e+07	1.99332e+07	2.3123e+07	1.89579e+07	2.88548e+07	4.66535e+07	6.28002e+07	2.55604e+07	3.88958e+07	4.53509e+07	4.44061e+07	5.49773e+07	6.30081e+07	2.819e+07	3.83089e+07	5.22141e+07	1.22414e+07	2.10911e+07	3.06819e+07	2.39689e+07	3.55601e+07	4.67751e+07	2.62608e+07	5.14542e+07	5.80626e+07	1.32979e+07	1.87333e+07	1.88138e+07	1.51941e+07	2.74333e+07	3.53683e+07	1.41486e+07	2.69841e+07	3.91138e+07
118	117.073	117.068	117.087	531.153	529.477	532.049	166	35	36	34	9	36	16	6.49595e+06	5.82416e+06	5.70153e+06	6.7977e+06	6.4928e+06	7.57667e+06	3.32669e+06	6.22138e+06	4.71102e+06	6.29861e+06	6.10403e+06	5.89166e+06	6.1102e+06	5.87756e+06	6.17751e+06	7.24703e+06	7.81074e+06	7.52358e+06	8.04263e+06	7.50036e+06	7.15834e+06	7.28633e+06	6.4484e+06	6.22852e+06	2.93512e+06	6.63389e+06	6.23471e+06	8.57622e+06	8.34617e+06	8.42096e+06	7.24297e+06	7.22643e+06	6.70208e+06	8.47816e+06	8.59107e+06	8.2546e+06
119	117.102	117.097	117.102	438.307	435.563	443.527	166	36	36	34	9	35	16	5.19296e+06	5.00781e+06	5.318e+06	5.16526e+06	5.28906e+06	5.34772e+06	5.42332e+06	4.6488e+06	4.51308e+06	5.16364e+06	5.04298e+06	5.01175e+06	7.07144e+06	4.53288e+06	4.70151e+06	7.24507e+06	4.68368e+06	4.79163e+06	4.9539e+06	5.11677e+06	5.16233e+06	5.13838e+06	5.10775e+06	5.02276e+06	4.48313e+06	4.702e+06	4.80479e+06	4.77688e+06	5.07522e+06	5.00507e+06	5.14537e+06	4.78123e+06	4.80322e+06	4.97126e+06	4.55881e+06	4.62485e+06
120	117.091	117.09	117.092	76.405	75.0812	77.5764	37	17	0	14	6	0	0	2.86079e+06	3.05322e+06	3.13854e+06	4.21456e+06	5.36817e+06	6.22838e+06	1.28539e+06	2.41108e+06	2.20232e+06	3.19463e+06	3.2805e+06	3.60238e+06	1.91497e+06	2.04726e+06	2.41545e+06	2.19307e+06	2.16327e+06	2.41448e+06	2.79415e+06	2.98341e+06	3.25702e+06	1.83447e+06	1.8429e+06	1.92639e+06	1.60994e+06	2.7891e+06	2.93961e+06	3.12367e+06	3.3844e+06	3.65073e+06	1.73906e+06	1.91195e+06	2.01582e+06	3.29904e+06	3.68083e+06	3.98946e+06
121	118.032	118.032	118.032	253.468	238.512	256.091	169	36	36	36	9	36	16	2.41853e+07	2.44211e+07	2.45724e+07	2.47777e+07	2.17075e+07	1.88758e+07	4.6511e+07	3.08949e+07	3.75219e+07	2.91694e+07	2.77441e+07	2.66309e+07	3.57256e+07	3.14533e+07	2.66743e+07	3.16977e+07	2.33278e+07	2.26595e+07	2.23004e+07	2.26901e+07	2.1785e+07	2.4861e+07	2.48694e+07	2.46825e+07	4.45692e+07	2.72581e+07	2.67377e+07	2.18969e+07	2.01699e+07	1.94438e+07	2.54133e+07	2.47383e+07	2.32831e+07	2.24519e+07	2.21715e+07	2.05903e+07
122	118.086	118.086	118.086	379.018	352.094	380.221	170	36	36	36	9	36	16	2.29399e+09	2.61675e+09	2.76022e+09	2.31883e+09	2.54712e+09	2.65185e+09	1.30924e+09	2.46194e+09	2.31737e+09	2.14788e+09	2.41494e+09	2.50171e+09	1.95749e+09	2.57859e+09	2.79903e+09	2.78834e+09	2.71414e+09	2.82336e+09	2.93172e+09	3.12524e+09	3.36231e+09	3.06623e+09	3.2292e+09	3.34052e+09	1.70514e+09	3.05536e+09	2.90903e+09	2.57641e+09	2.80141e+09	2.8766e+09	2.97865e+09	3.23287e+09	3.32564e+09	2.45702e+09	2.87794e+09	3.01919e+09
123	119.088	119.088	119.09	379.196	350.866	381.287	173	36	36	34	9	36	16	1.23296e+08	1.4056e+08	1.4862e+08	1.24257e+08	1.38093e+08	1.4519e+08	6.80381e+07	1.31822e+08	1.23857e+08	1.13947e+08	1.30348e+08	1.35628e+08	1.04151e+08	9.56258e+07	1.03185e+08	1.49482e+08	1.47126e+08	1.5248e+08	1.58954e+08	1.71336e+08	1.84495e+08	1.67925e+08	1.7911e+08	1.84312e+08	6.08985e+07	1.64801e+08	1.57504e+08	1.40063e+08	1.53631e+08	1.58023e+08	1.61587e+08	1.77875e+08	1.82965e+08	1.34234e+08	1.56732e+08	1.664e+08
124	119.035	119.034	119.035	207.576	205.847	247.666	161	36	36	32	9	30	16	5.242e+06	5.26922e+06	4.85464e+06	4.1098e+06	4.50539e+06	4.77138e+06	1.89324e+06	1.80782e+06	1.57821e+06	3.57e+06	3.79083e+06	3.86772e+06	2.36952e+06	2.39747e+06	2.48678e+06	2.20135e+06	2.40617e+06	2.26504e+06	2.96284e+06	2.72967e+06	2.62244e+06	2.1003e+06	2.01684e+06	2.08801e+06	919832	2.13711e+06	2.05079e+06	3.02918e+06	3.01828e+06	3.15319e+06	2.10889e+06	2.30187e+06	2.33451e+06	2.60279e+06	2.68434e+06	2.51215e+06
125	119.924	119.922	119.925	385.971	385.156	386.888	124	34	18	31	9	19	13	1.02217e+06	882563	1.12006e+06	1.17314e+06	1.01098e+06	863337	650843	926972	999865	1.11029e+06	1.01349e+06	1.18915e+06	1.48333e+06	1.04796e+06	1.08797e+06	1.54771e+06	910125	1.09614e+06	941574	1.04446e+06	971829	1.1083e+06	1.08302e+06	1.18528e+06	700873	966147	1.0053e+06	999068	991833	845245	1.02673e+06	883680	1.06493e+06	1.13418e+06	978842	1.04039e+06
126	120.065	120.003	120.066	431.141	429.41	435.28	169	36	36	36	9	36	16	3.43689e+08	3.30937e+08	3.27173e+08	3.39714e+08	3.70935e+08	4.14124e+08	6.30131e+07	2.71948e+08	2.05391e+08	3.13755e+08	3.16937e+08	3.30001e+08	3.04862e+08	2.60153e+08	2.95232e+08	3.25469e+08	3.16609e+08	3.2093e+08	4.14813e+08	3.96865e+08	3.93536e+08	3.67191e+08	3.50012e+08	3.46806e+08	1.06092e+08	3.16436e+08	3.10651e+08	4.08645e+08	4.21025e+08	4.31288e+08	3.50886e+08	3.55157e+08	3.57397e+08	3.67009e+08	3.71624e+08	3.76554e+08
127	120.081	120.077	120.081	342.045	341.471	349.236	169	36	36	36	9	36	16	1.98526e+09	1.99726e+09	1.93259e+09	1.97914e+09	2.18077e+09	2.35315e+09	5.58853e+08	1.6872e+09	1.36562e+09	1.81846e+09	1.89103e+09	1.89414e+09	1.75308e+09	1.63081e+09	1.87241e+09	2.04278e+09	2.11605e+09	2.11489e+09	2.10973e+09	2.07222e+09	2.06543e+09	1.9951e+09	2.00917e+09	1.96481e+09	8.08101e+08	1.87432e+09	1.72365e+09	2.14263e+09	2.23035e+09	2.29028e+09	1.87978e+09	1.97398e+09	1.92677e+09	2.01409e+09	2.10022e+09	2.09273e+09
128	121.083	121.079	121.084	341.841	341.312	348.955	168	36	36	35	9	36	16	1.71865e+08	1.72362e+08	1.68418e+08	1.72306e+08	1.87983e+08	2.0398e+08	5.12404e+07	1.46168e+08	1.19436e+08	1.58028e+08	1.62524e+08	1.64796e+08	1.52956e+08	1.42104e+08	1.60253e+08	1.78062e+08	1.83974e+08	1.84518e+08	1.82692e+08	1.79143e+08	1.78069e+08	1.70384e+08	1.73114e+08	1.69907e+08	7.0916e+07	1.61849e+08	1.48816e+08	1.8384e+08	1.94712e+08	1.98858e+08	1.63793e+08	1.69069e+08	1.66146e+08	1.75752e+08	1.83095e+08	1.80865e+08
129	121.069	121.069	121.069	431.066	429.41	435.28	167	36	36	34	9	36	16	1.35463e+07	1.32426e+07	1.3033e+07	1.34558e+07	1.47373e+07	1.67166e+07	2.39409e+06	1.07027e+07	8.15431e+06	1.26505e+07	1.25713e+07	1.3163e+07	1.20262e+07	1.04208e+07	1.17964e+07	1.29417e+07	1.25512e+07	1.2542e+07	1.68607e+07	1.61746e+07	1.61271e+07	1.48136e+07	1.39879e+07	1.39519e+07	4.16115e+06	1.26492e+07	1.24805e+07	1.64189e+07	1.66883e+07	1.73169e+07	1.36509e+07	1.41686e+07	1.44581e+07	1.45933e+07	1.49498e+07	1.51344e+07
130	122.075	122.072	122.081	385.044	364.049	387.081	169	36	36	36	9	36	16	2.34339e+08	2.28755e+08	2.03183e+08	2.25545e+08	2.11997e+08	1.93314e+08	2.47756e+08	2.07877e+08	1.74417e+08	2.30118e+08	2.22863e+08	2.09684e+08	3.00263e+08	2.16781e+08	1.91516e+08	3.09425e+08	2.27145e+08	1.97588e+08	2.02344e+08	1.76745e+08	1.58807e+08	2.19721e+08	1.92412e+08	1.72561e+08	1.91354e+08	1.94475e+08	1.51827e+08	2.26194e+08	2.05803e+08	1.83825e+08	2.15646e+08	1.80286e+08	1.49914e+08	2.15842e+08	1.85124e+08	1.5682e+08
131	122.081	122.081	122.081	330.616	328.195	335.567	148	31	35	26	9	32	15	6.34357e+07	5.49344e+07	4.96331e+07	6.22808e+07	5.51023e+07	5.37114e+07	5.96186e+07	5.78673e+07	4.83293e+07	5.75686e+07	5.11541e+07	4.76209e+07	6.85367e+07	5.62348e+07	5.41849e+07	6.99805e+07	6.54356e+07	5.79962e+07	7.27438e+07	6.52043e+07	5.8968e+07	7.56175e+07	6.93126e+07	6.11324e+07	5.51913e+07	6.91375e+07	6.08177e+07	7.06717e+07	6.41998e+07	5.97097e+07	7.68604e+07	6.99119e+07	6.26088e+07	7.25727e+07	6.65793e+07	6.01315e+07
132	122.094	122.092	122.095	90.6105	85.4391	91.5275	24	12	0	7	5	0	0	3.34492e+07	3.15927e+07	3.16879e+07	3.35817e+07	3.368e+07	3.72944e+07	1.98208e+07	2.9667e+07	2.44515e+07	3.39853e+07	3.25516e+07	3.43989e+07	4.15712e+07	3.13803e+07	3.292e+07	4.15076e+07	3.36067e+07	3.39584e+07	3.26346e+07	3.27114e+07	3.88198e+07	3.17837e+07	3.1682e+07	3.09723e+07	2.08138e+07	2.97655e+07	3.18143e+07	3.12467e+07	3.29687e+07	3.50362e+07	3.12049e+07	2.97231e+07	3.27255e+07	3.18303e+07	3.02013e+07	3.39086e+07
133	122.929	122.926	122.956	386.345	385.275	386.995	167	36	36	34	9	36	16	3.04756e+07	3.3921e+07	3.81894e+07	3.03567e+07	3.28689e+07	3.33905e+07	1.93589e+07	3.19058e+07	3.2739e+07	3.08922e+07	3.51273e+07	3.77285e+07	4.01795e+07	3.30461e+07	3.65771e+07	4.12714e+07	3.26477e+07	3.52798e+07	2.95263e+07	3.41893e+07	3.92703e+07	3.18335e+07	3.70032e+07	4.05558e+07	2.16418e+07	3.53399e+07	3.9458e+07	2.81769e+07	3.10146e+07	3.27444e+07	3.00764e+07	3.42667e+07	3.84866e+07	2.79622e+07	3.31071e+07	3.72803e+07
134	123.055	123.055	123.06	107.493	105.109	108.208	169	36	36	36	9	36	16	2.05423e+09	2.02205e+09	1.95471e+09	2.06672e+09	2.21373e+09	2.31872e+09	7.8155e+08	1.61237e+09	1.32825e+09	1.81715e+09	1.80771e+09	1.8385e+09	2.066e+09	1.63044e+09	1.80144e+09	2.2006e+09	1.91807e+09	1.92377e+09	2.42487e+09	2.36281e+09	2.33768e+09	2.1998e+09	2.12058e+09	2.11563e+09	9.47037e+08	1.8789e+09	1.82211e+09	2.31867e+09	2.37168e+09	2.39401e+09	2.1363e+09	2.10208e+09	2.07232e+09	2.07222e+09	2.04844e+09	2.02142e+09
135	123.04	123.04	123.04	633.312	630.138	646.448	154	32	30	35	9	33	15	7.63572e+06	7.42984e+06	7.63428e+06	7.97746e+06	8.55927e+06	9.43822e+06	3.4789e+06	4.94424e+06	3.91342e+06	8.1351e+06	8.10173e+06	8.47422e+06	8.85449e+06	6.29991e+06	7.0184e+06	9.19044e+06	7.26101e+06	7.32095e+06	9.50535e+06	9.3008e+06	9.36015e+06	8.42682e+06	8.49078e+06	8.53262e+06	3.95919e+06	7.87169e+06	7.85326e+06	1.01784e+07	1.04763e+07	1.10316e+07	8.43874e+06	8.70771e+06	8.77098e+06	9.50549e+06	9.4404e+06	9.88688e+06
136	124.024	124.024	124.024	633.408	630.138	650.918	168	36	36	35	9	36	16	6.88142e+07	6.73556e+07	6.69439e+07	7.14584e+07	7.60122e+07	8.2938e+07	2.99534e+07	4.76116e+07	3.9575e+07	7.22453e+07	7.2595e+07	7.38531e+07	7.21197e+07	5.56896e+07	6.24222e+07	7.49039e+07	6.36286e+07	6.47594e+07	8.48082e+07	8.27182e+07	8.37659e+07	7.65144e+07	7.73952e+07	7.55685e+07	3.70521e+07	7.08691e+07	7.03361e+07	9.10104e+07	9.34658e+07	9.62442e+07	7.86798e+07	7.82095e+07	7.88073e+07	8.70147e+07	8.56288e+07	8.58945e+07
137	124.066	124.063	124.074	107.495	104.836	108.474	167	36	36	34	9	36	16	1.56612e+08	1.56282e+08	1.51702e+08	1.57493e+08	1.6409e+08	1.71378e+08	1.03568e+08	1.37248e+08	1.23207e+08	1.42252e+08	1.41913e+08	1.43971e+08	1.68834e+08	1.34939e+08	1.43413e+08	1.77075e+08	1.47126e+08	1.50118e+08	1.77751e+08	1.76469e+08	1.74321e+08	1.65969e+08	1.60085e+08	1.60471e+08	1.03105e+08	1.46764e+08	1.43754e+08	1.73404e+08	1.74139e+08	1.77688e+08	1.63551e+08	1.61206e+08	1.59965e+08	1.59034e+08	1.5732e+08	1.55236e+08
138	124.935	124.929	124.945	384.729	383.608	385.726	167	36	36	34	9	36	16	5.10487e+06	5.49283e+06	5.85285e+06	4.71732e+06	5.09755e+06	5.56381e+06	2.91207e+06	5.09001e+06	4.60309e+06	5.011e+06	5.7068e+06	5.74014e+06	6.45215e+06	5.04084e+06	5.80382e+06	6.75429e+06	5.70855e+06	5.84081e+06	4.62993e+06	5.41295e+06	6.05045e+06	5.2193e+06	5.55319e+06	6.03455e+06	3.41406e+06	5.56765e+06	5.28691e+06	4.69154e+06	5.22035e+06	5.53423e+06	4.79323e+06	5.26804e+06	5.8956e+06	4.60025e+06	5.0322e+06	5.67961e+06
139	125.025	125.025	125.025	633.342	629.867	637.684	164	35	35	34	9	35	16	8.25782e+06	8.2038e+06	8.13982e+06	8.7236e+06	9.16521e+06	1.00765e+07	3.68747e+06	5.85793e+06	4.14216e+06	8.52011e+06	8.84672e+06	9.0426e+06	8.88965e+06	6.85372e+06	7.47504e+06	9.00369e+06	7.99036e+06	7.99992e+06	1.03075e+07	1.00564e+07	9.94743e+06	9.1518e+06	9.32139e+06	9.10336e+06	4.63007e+06	8.62637e+06	8.40471e+06	1.10106e+07	1.13246e+07	1.15316e+07	9.54279e+06	9.40139e+06	9.31778e+06	1.05141e+07	1.04117e+07	1.06129e+07
140	124.899	124.893	124.921	103.44	91.5752	105.23	161	36	35	34	9	33	14	4.30719e+06	4.62946e+06	4.52071e+06	4.29657e+06	4.65336e+06	4.91192e+06	2.34811e+06	4.20296e+06	4.066e+06	4.13714e+06	4.49765e+06	4.57533e+06	2.64433e+06	4.05592e+06	4.46473e+06	2.82091e+06	4.19157e+06	4.27296e+06	3.33489e+06	3.65947e+06	3.73128e+06	3.13495e+06	3.10862e+06	3.26547e+06	2.92359e+06	3.62067e+06	3.1722e+06	3.36007e+06	3.3809e+06	3.52605e+06	3.12611e+06	3.68899e+06	3.35286e+06	2.99643e+06	3.59989e+06	3.21686e+06
141	125.021	125.02	125.021	424.059	422.778	425.041	126	27	35	19	9	21	15	2.4727e+06	2.57118e+06	2.65399e+06	2.45188e+06	2.91346e+06	3.25803e+06	399761	2.16647e+06	1.83916e+06	2.10386e+06	2.27223e+06	2.58038e+06	1.64733e+06	2.00763e+06	2.43624e+06	1.84357e+06	2.59184e+06	2.82598e+06	4.42926e+06	4.41727e+06	4.69187e+06	3.92552e+06	4.06934e+06	4.05673e+06	1.44894e+06	3.79611e+06	3.78237e+06	4.58644e+06	4.67997e+06	5.05484e+06	3.71747e+06	4.07544e+06	4.07273e+06	3.82903e+06	4.25176e+06	4.53087e+06
142	125.035	125.035	125.035	278.816	275.184	305.495	167	36	36	34	9	36	16	2.63955e+07	2.947e+07	2.96044e+07	2.66338e+07	3.06485e+07	3.1611e+07	5.24201e+06	2.48491e+07	2.14661e+07	2.47981e+07	2.84419e+07	2.87689e+07	1.99867e+07	2.45286e+07	2.71178e+07	3.06455e+07	2.77638e+07	2.95449e+07	2.58033e+07	2.66939e+07	2.68583e+07	2.45024e+07	2.66017e+07	2.67864e+07	9.15941e+06	2.5184e+07	2.36385e+07	2.76665e+07	2.95553e+07	3.00959e+07	2.21734e+07	2.58345e+07	2.62737e+07	2.32632e+07	2.74393e+07	2.73215e+07
143	125.071	125.071	125.071	180.936	172.669	231.191	166	35	36	34	9	36	16	1.41109e+08	1.47418e+08	1.13481e+08	1.35009e+08	1.08469e+08	1.10962e+08	3.56322e+07	1.19343e+08	1.13214e+08	1.37375e+08	1.42835e+08	1.14167e+08	1.50931e+08	1.1657e+08	1.039e+08	1.6583e+08	1.37807e+08	1.106e+08	1.76634e+08	1.39029e+08	1.41991e+08	1.8653e+08	1.47136e+08	1.44801e+08	8.38127e+07	1.74398e+08	1.30294e+08	1.9973e+08	1.59505e+08	1.61462e+08	1.84079e+08	1.7987e+08	1.32737e+08	1.87628e+08	1.38881e+08	1.387e+08
144	126.022	126.022	126.022	633.527	630.138	638.229	153	34	26	34	9	34	16	9.2153e+06	9.25347e+06	9.19024e+06	9.74231e+06	1.02305e+07	1.13703e+07	4.14729e+06	6.52739e+06	4.79714e+06	9.72009e+06	9.65973e+06	9.94991e+06	9.8034e+06	7.54972e+06	8.45295e+06	1.02011e+07	8.78334e+06	8.65852e+06	1.14631e+07	1.11109e+07	1.12852e+07	1.01742e+07	1.05479e+07	9.97786e+06	4.98111e+06	9.43809e+06	9.46466e+06	1.24072e+07	1.26047e+07	1.29801e+07	1.07972e+07	1.05959e+07	1.06368e+07	1.17443e+07	1.17053e+07	1.16915e+07
145	126.035	126.029	126.043	373.239	371.466	375.769	167	36	36	34	9	36	16	6.88703e+07	6.81517e+07	6.69942e+07	6.54827e+07	6.9888e+07	7.39881e+07	2.01658e+07	4.12293e+07	3.45989e+07	5.88619e+07	6.02255e+07	6.08988e+07	7.33787e+07	4.25528e+07	4.77971e+07	8.22923e+07	5.18877e+07	5.23957e+07	5.24202e+07	4.94843e+07	4.92805e+07	4.9543e+07	4.85318e+07	4.87954e+07	2.09859e+07	4.28339e+07	3.90225e+07	5.59254e+07	5.81148e+07	5.75657e+07	4.47434e+07	4.36817e+07	4.37416e+07	4.95175e+07	4.76535e+07	4.88438e+07
146	126.066	126.066	126.066	293.607	290.32	325.592	158	31	35	34	9	34	15	5.66167e+07	6.25211e+07	6.66147e+07	5.81511e+07	6.34904e+07	6.59575e+07	1.75902e+07	5.32513e+07	4.71533e+07	5.63063e+07	6.24181e+07	6.52171e+07	4.23805e+07	5.1782e+07	5.73969e+07	4.2116e+07	5.84452e+07	6.17336e+07	5.55285e+07	5.8435e+07	5.86117e+07	5.46641e+07	5.74138e+07	5.90307e+07	2.28874e+07	5.35681e+07	5.28357e+07	5.63901e+07	6.02034e+07	6.06759e+07	4.95192e+07	5.48671e+07	5.63243e+07	5.12607e+07	5.87535e+07	5.91339e+07
147	126.895	126.89	126.963	102.782	90.9934	105.124	162	36	35	35	9	33	14	4.57558e+06	4.94039e+06	4.81742e+06	4.51277e+06	5.15362e+06	5.18509e+06	2.53468e+06	4.69948e+06	4.52119e+06	4.37035e+06	4.67921e+06	4.73064e+06	3.94193e+06	4.51919e+06	4.48449e+06	4.63421e+06	4.7694e+06	4.56222e+06	3.63673e+06	3.81235e+06	4.07323e+06	3.20266e+06	3.46713e+06	3.55738e+06	3.45391e+06	3.88239e+06	3.49965e+06	3.58113e+06	3.59524e+06	3.90939e+06	3.42294e+06	4.37749e+06	3.5836e+06	3.16634e+06	4.55279e+06	3.36726e+06
148	127.098	127.047	127.098	376.11	351.161	380.559	170	36	36	36	9	36	16	6.54656e+08	6.55984e+08	6.70341e+08	6.41611e+08	6.13291e+08	6.08774e+08	4.72504e+08	5.86274e+08	5.80608e+08	6.22639e+08	6.15347e+08	6.50016e+08	8.02389e+08	6.02083e+08	6.30051e+08	8.12736e+08	6.23797e+08	6.41352e+08	5.97781e+08	6.0899e+08	6.31322e+08	6.16878e+08	6.15685e+08	6.5239e+08	5.38883e+08	6.21243e+08	6.22532e+08	5.87991e+08	5.94407e+08	6.12245e+08	7.11745e+08	6.1782e+08	6.25646e+08	6.80349e+08	6.05918e+08	6.17771e+08
149	127.098	127.098	127.098	523.91	523.05	524.315	167	36	36	34	9	36	16	6.00943e+07	3.95508e+07	3.60575e+07	5.82367e+07	4.0539e+07	3.7715e+07	2.61227e+07	4.30464e+07	3.22045e+07	5.73821e+07	3.97413e+07	3.54297e+07	4.87952e+07	4.13192e+07	3.61877e+07	5.38722e+07	4.56958e+07	3.66461e+07	5.38145e+07	3.84234e+07	3.46448e+07	4.98355e+07	3.62412e+07	3.35359e+07	3.71746e+07	4.04998e+07	3.32487e+07	5.11839e+07	3.85848e+07	3.5894e+07	6.07526e+07	4.10587e+07	3.52274e+07	6.17121e+07	4.16563e+07	3.64432e+07
150	127.097	127.045	127.098	322.962	315.881	348.595	172	36	36	34	9	36	16	2.13446e+08	2.03468e+08	1.99134e+08	2.08648e+08	2.17369e+08	2.26501e+08	1.02257e+08	1.6355e+08	1.30945e+08	1.97739e+08	2.03064e+08	2.08083e+08	2.52703e+08	1.52111e+08	1.77934e+08	2.94602e+08	2.07346e+08	2.05819e+08	2.15347e+08	2.078e+08	2.07516e+08	1.94236e+08	1.93663e+08	1.88043e+08	1.28638e+08	1.75072e+08	1.63023e+08	2.17711e+08	2.16152e+08	2.23402e+08	1.93198e+08	1.90957e+08	1.86558e+08	2.06368e+08	2.03001e+08	2.01922e+08
151	127.039	127.032	127.039	139.669	135.894	152.418	130	29	36	27	0	25	13	3.43619e+06	3.05341e+06	3.63628e+06	3.78715e+06	4.3328e+06	5.19298e+06	1.00205e+06	5.83043e+06	4.83786e+06	3.06006e+06	3.06811e+06	3.46312e+06	7.28004e+06	5.98035e+06	6.78348e+06	7.7111e+06	7.06377e+06	7.36951e+06	4.54727e+06	8.40311e+06	8.49529e+06	4.04646e+06	6.92649e+06	6.89963e+06	2.70526e+06	7.98569e+06	8.1907e+06	7.92845e+06	8.34868e+06	8.94845e+06	3.91983e+06	8.66592e+06	9.06541e+06	4.82915e+06	9.77652e+06	1.00508e+07
152	128.099	128.017	128.101	377.273	374.346	381.526	167	36	36	34	9	36	16	3.39068e+07	3.43349e+07	3.45745e+07	3.37499e+07	3.19872e+07	2.47929e+06	2.85036e+07	3.40074e+07	3.38535e+07	3.32882e+07	3.21563e+07	3.45703e+07	4.44859e+07	3.465e+07	3.53001e+07	4.42509e+07	3.53242e+07	3.59167e+07	3.38175e+07	3.39225e+07	3.48755e+07	3.52976e+07	3.50149e+07	3.63495e+07	3.2515e+07	3.48895e+07	3.51202e+07	3.23334e+07	3.23756e+07	3.33054e+07	4.03563e+07	3.47887e+07	3.48351e+07	3.86272e+07	3.41425e+07	3.45238e+07
153	128.083	128.082	128.085	328.573	326.291	333.044	165	34	36	34	9	36	16	2.55932e+08	2.50473e+08	2.41162e+08	2.43039e+08	2.5353e+08	2.6465e+08	1.15501e+07	3.46574e+07	2.76439e+07	2.30688e+08	2.31054e+08	2.31998e+08	3.4231e+07	3.30528e+07	3.67847e+07	3.9185e+07	3.99071e+07	4.13907e+07	7.3672e+07	7.29329e+07	7.27873e+07	7.75061e+07	7.70956e+07	7.6971e+07	1.48944e+07	3.36454e+07	3.1704e+07	1.47671e+08	1.49352e+08	1.53984e+08	3.47549e+07	3.53827e+07	3.3742e+07	3.57423e+07	3.60846e+07	3.52415e+07
154	128.071	128.071	128.071	541.295	531.59	543.798	148	30	29	34	8	33	14	1.0244e+08	1.03079e+08	9.84811e+07	9.97089e+07	1.04695e+08	9.72752e+07	6.95088e+07	9.31212e+07	8.26514e+07	9.56827e+07	9.78452e+07	9.3283e+07	1.0792e+08	9.15974e+07	8.69313e+07	1.27611e+08	9.34849e+07	8.78153e+07	1.03848e+08	9.25787e+07	8.76936e+07	1.01117e+08	8.58218e+07	8.88358e+07	7.94877e+07	9.01205e+07	8.28016e+07	1.04612e+08	9.23783e+07	8.84188e+07	1.16809e+08	9.05669e+07	8.52137e+07	1.18212e+08	9.21933e+07	8.7591e+07
155	128.071	128.071	128.071	502.224	500.943	503.611	123	27	27	23	9	25	12	3.03401e+07	4.2999e+07	5.20493e+07	3.04198e+07	4.52244e+07	5.80422e+07	1.45815e+07	3.54052e+07	4.26071e+07	2.82979e+07	4.07418e+07	5.05198e+07	2.61331e+07	3.34076e+07	4.64498e+07	3.01774e+07	3.66424e+07	4.85745e+07	3.70789e+07	5.01912e+07	5.97053e+07	3.4077e+07	4.20623e+07	5.58458e+07	1.24357e+07	3.74092e+07	4.76438e+07	3.78011e+07	5.27019e+07	6.27851e+07	2.54978e+07	4.27176e+07	5.37193e+07	2.7431e+07	4.4636e+07	5.4867e+07
156	128.045	128.045	128.045	267.08	264.409	269.303	79	15	16	17	1	22	8	975634	1.06553e+06	1.04282e+06	836119	1.10557e+06	1.31894e+06	297387	843322	581086	904976	1.01501e+06	1.04883e+06	809993	756257	984921	988806	1.05752e+06	1.27048e+06	1.07183e+06	1.15445e+06	1.27647e+06	1.27514e+06	1.15618e+06	1.43306e+06	233383	967092	904221	1.20194e+06	1.48038e+06	1.48977e+06	968794	1.09093e+06	1.18802e+06	929756	1.20566e+06	1.27442e+06
157	128.03	128.018	128.032	148.27	146.288	148.922	23	0	0	21	0	2	0	696382	727020	665327	607056	616434	650568	581858	542499	517401	611873	686966	667498	447988	482015	506058	513552	580972	531761	455042	407998	402717	373007	354882	350879	282684	323613	345548	520056	469042	498486	328158	385289	369623	383357	383168	401211
158	129.102	129.102	129.102	497.301	491.909	529.106	179	36	36	36	9	36	16	6.67771e+08	6.64259e+08	6.73134e+08	6.66294e+08	6.67224e+08	6.77471e+08	1.14622e+08	6.63758e+08	6.65843e+08	6.63546e+08	6.60744e+08	6.68087e+08	1.08219e+08	6.5845e+08	6.67221e+08	1.0855e+08	6.70926e+08	6.70418e+08	6.63967e+08	6.68044e+08	6.70925e+08	6.71442e+08	6.81232e+08	6.76192e+08	6.80393e+08	6.74244e+08	6.69326e+08	6.66289e+08	6.67696e+08	6.70097e+08	6.75584e+08	6.60887e+08	6.64673e+08	6.69729e+08	6.62514e+08	6.59302e+08
159	128.933	128.932	129.066	276.502	241.52	283.552	167	36	36	34	9	36	16	1.28851e+06	2.81959e+06	2.3775e+06	1.2457e+06	2.49813e+06	2.05657e+06	1.6125e+06	3.20532e+06	2.99637e+06	1.51894e+06	2.60706e+06	2.20837e+06	1.51345e+08	3.49032e+06	3.09125e+06	1.41062e+08	3.35453e+06	3.24016e+06	2.22702e+06	2.53143e+06	2.22325e+06	2.37686e+06	2.66326e+06	2.34479e+06	1.96978e+06	3.35398e+06	2.84479e+06	2.02771e+06	2.51326e+06	2.04854e+06	1.50367e+06	3.30408e+06	2.84715e+06	1.22702e+06	3.14758e+06	2.73006e+06
160	128.954	128.952	129.074	415.393	412.678	431.548	169	36	36	36	9	36	16	6.26111e+06	7.07246e+06	8.31746e+06	5.96012e+06	6.47848e+07	7.28433e+07	9.22264e+06	7.81692e+06	9.5593e+06	7.11694e+06	7.69768e+06	8.46191e+06	4.34892e+07	7.95644e+06	8.50335e+06	5.25177e+07	6.98976e+06	8.63604e+06	6.83123e+07	6.61463e+07	6.5402e+07	7.4334e+06	8.94776e+06	8.89155e+06	8.05416e+06	8.00386e+06	9.27877e+06	6.68634e+07	6.92551e+07	7.07154e+07	6.31036e+06	8.22249e+06	5.91927e+07	6.2555e+07	6.44431e+07	6.51229e+07
161	130.051	130.05	130.053	444.409	441.757	446.982	169	36	36	36	9	36	16	9.80394e+08	9.5032e+08	9.35917e+08	1.01872e+09	1.13395e+09	1.25568e+09	1.93204e+08	7.87805e+08	5.98485e+08	9.06999e+08	9.36047e+08	9.67481e+08	8.97895e+08	7.88435e+08	9.11372e+08	1.01426e+09	1.02764e+09	1.02082e+09	1.01427e+09	9.84155e+08	9.82693e+08	9.17408e+08	8.95696e+08	8.87235e+08	2.88944e+08	8.3798e+08	8.20075e+08	1.00404e+09	1.02602e+09	1.04696e+09	9.2126e+08	9.42518e+08	9.55762e+08	1.03086e+09	1.06157e+09	1.06536e+09
162	130.097	130.097	130.097	394.406	393.364	407.782	169	36	36	36	9	36	16	8.09164e+08	7.77849e+08	7.72049e+08	7.99142e+08	7.60323e+08	7.54288e+08	6.27876e+08	7.43648e+08	7.17783e+08	7.63619e+08	7.28562e+08	7.38047e+08	9.10437e+08	7.34272e+08	7.4985e+08	9.31814e+08	7.63325e+08	7.67523e+08	7.6944e+08	7.57989e+08	7.57664e+08	7.75858e+08	7.50747e+08	7.6508e+08	6.92884e+08	7.52001e+08	7.50534e+08	7.67661e+08	7.50594e+08	7.57537e+08	8.67165e+08	7.58979e+08	7.63328e+08	8.45994e+08	7.55085e+08	7.42607e+08
163	130.087	130.087	130.106	526.164	495.254	526.459	169	36	36	36	9	36	16	1.15748e+09	1.12776e+09	1.11092e+09	1.16878e+09	1.26703e+09	1.38166e+09	2.69155e+08	9.3618e+08	7.28386e+08	1.06926e+09	1.0804e+09	1.11717e+09	9.76755e+08	9.06595e+08	1.02858e+09	1.09585e+09	1.1356e+09	1.13726e+09	1.22211e+09	1.19232e+09	1.1842e+09	1.07431e+09	1.05998e+09	1.04415e+09	3.60653e+08	9.74236e+08	9.54884e+08	1.23223e+09	1.27161e+09	1.30364e+09	1.03107e+09	1.08309e+09	1.08406e+09	1.15071e+09	1.1931e+09	1.20506e+09
164	130.098	130.098	130.098	345.606	342.503	352.532	167	36	36	34	9	36	16	2.76392e+08	2.6198e+08	2.57044e+08	2.71178e+08	2.55331e+08	2.41555e+08	1.16547e+08	2.53906e+08	2.31104e+08	2.5684e+08	2.47058e+08	2.51137e+08	2.76416e+08	2.47589e+08	2.46081e+08	2.94053e+08	2.51008e+08	2.45256e+08	2.69056e+08	2.57098e+08	2.43866e+08	2.5341e+08	2.43652e+08	2.33479e+08	1.74205e+08	2.44012e+08	2.29956e+08	2.57391e+08	2.4356e+08	2.43555e+08	2.76147e+08	2.58252e+08	2.38431e+08	2.69473e+08	2.49552e+08	2.33431e+08
165	130.067	130.066	130.072	97.4601	94.8504	100.321	163	36	36	34	9	32	16	2.00937e+08	1.88986e+08	1.72294e+08	1.54458e+08	1.40538e+08	1.27091e+08	9.61703e+07	1.85739e+08	1.62052e+08	1.44733e+08	1.39785e+08	1.28459e+08	2.64208e+08	1.79605e+08	1.81492e+08	2.64256e+08	1.85215e+08	1.79952e+08	2.29897e+08	2.21596e+08	2.1259e+08	1.87529e+08	1.75355e+08	1.74194e+08	1.34052e+08	2.107e+08	1.98659e+08	1.76074e+08	1.7344e+08	1.61939e+08	2.63479e+08	2.31475e+08	2.16604e+08	2.24334e+08	2.00556e+08	1.83267e+08
166	130.93	130.929	130.93	274.159	240.988	278.656	50	20	0	18	8	1	3	208996	712702	492048	252152	564137	387077	464209	954531	908184	260516	724689	479843	169435	954187	855976	144922	953748	898290	502734	677804	485278	591575	700405	496242	558488	990182	664534	526574	516770	389942	253992	891186	721135	275924	888879	712421
167	131.091	131.09	131.092	526.194	525.361	526.535	167	36	36	34	9	36	16	6.81542e+07	6.58679e+07	6.58779e+07	6.93932e+07	7.44901e+07	8.31916e+07	1.56938e+07	5.49635e+07	4.25061e+07	6.19649e+07	6.33623e+07	6.64846e+07	5.68729e+07	5.28121e+07	6.07523e+07	6.34372e+07	6.59532e+07	6.71893e+07	7.22258e+07	7.1526e+07	6.94672e+07	6.38774e+07	6.29769e+07	6.09816e+07	2.07753e+07	5.65973e+07	5.56447e+07	7.17235e+07	7.53998e+07	7.80792e+07	5.96507e+07	6.29852e+07	6.51353e+07	6.77707e+07	7.08777e+07	7.15141e+07
168	131.101	131.1	131.101	393.914	393.082	394.94	167	36	36	34	9	36	16	4.28261e+07	4.07234e+07	4.02915e+07	4.24803e+07	4.07213e+07	3.9801e+07	3.21327e+07	3.92773e+07	3.78648e+07	4.01177e+07	3.88566e+07	3.88305e+07	4.85607e+07	3.93623e+07	3.96445e+07	4.94291e+07	4.00572e+07	4.03708e+07	4.04791e+07	3.98295e+07	3.99166e+07	4.10321e+07	3.94414e+07	4.07857e+07	3.67337e+07	3.95018e+07	3.96452e+07	4.03616e+07	3.9143e+07	3.96949e+07	4.56421e+07	4.02189e+07	4.02312e+07	4.47798e+07	3.96068e+07	3.86566e+07
169	131.054	131.053	131.057	444.34	441.757	446.982	167	36	36	34	9	36	16	5.07301e+07	4.99989e+07	4.84392e+07	5.32025e+07	5.8939e+07	6.45988e+07	9.66705e+06	3.97611e+07	3.08464e+07	4.64335e+07	4.75794e+07	4.93368e+07	4.57862e+07	4.1063e+07	4.69592e+07	5.15896e+07	5.28815e+07	5.24641e+07	5.16936e+07	5.05806e+07	5.07436e+07	4.66408e+07	4.61811e+07	4.55545e+07	1.47015e+07	4.37614e+07	4.25056e+07	5.18176e+07	5.34378e+07	5.42434e+07	4.7411e+07	4.88799e+07	4.99434e+07	5.43616e+07	5.50075e+07	5.44196e+07
170	131.06	131.055	131.066	342.307	341.899	349.236	167	36	36	34	9	36	16	3.03953e+07	3.11026e+07	3.09832e+07	3.00761e+07	3.35166e+07	3.68231e+07	9.87652e+06	2.70577e+07	2.21791e+07	2.768e+07	2.8597e+07	3.03949e+07	2.66961e+07	2.56675e+07	3.00551e+07	3.09688e+07	3.24654e+07	3.31167e+07	3.29573e+07	3.31028e+07	3.29646e+07	3.09559e+07	3.22162e+07	3.09823e+07	1.41222e+07	2.91183e+07	2.79003e+07	3.21932e+07	3.45644e+07	3.60576e+07	2.89695e+07	3.05053e+07	3.1991e+07	3.09034e+07	3.24538e+07	3.35196e+07
171	131.07	131.068	131.075	97.4342	94.578	100.321	164	36	36	34	9	33	16	1.80464e+07	1.69141e+07	1.53476e+07	1.36725e+07	1.22124e+07	1.11015e+07	8.56434e+06	1.67317e+07	1.43454e+07	1.28856e+07	1.25703e+07	1.12885e+07	2.36005e+07	1.60815e+07	1.62589e+07	2.35108e+07	1.67439e+07	1.595e+07	2.03352e+07	1.98618e+07	1.9244e+07	1.66328e+07	1.58175e+07	1.52635e+07	1.2043e+07	1.89553e+07	1.73281e+07	1.54839e+07	1.54871e+07	1.43603e+07	2.3529e+07	2.06378e+07	1.94101e+07	2.00102e+07	1.79763e+07	1.62871e+07
172	131.162	131.162	131.164	190.433	188.204	192.317	52	6	9	8	1	13	15	1.59554e+06	1.63189e+06	1.6573e+06	1.67199e+06	1.82539e+06	1.94587e+06	1.69402e+06	1.62493e+06	1.56467e+06	1.89059e+06	1.93717e+06	1.9896e+06	1.63998e+06	1.67884e+06	1.65682e+06	1.33814e+06	1.40491e+06	1.42054e+06	1.56092e+06	1.57697e+06	1.6569e+06	1.47917e+06	1.5436e+06	1.43519e+06	1.33441e+06	1.63544e+06	1.66738e+06	2.13722e+06	2.24239e+06	2.20448e+06	1.64941e+06	1.6559e+06	1.62592e+06	1.71637e+06	1.71856e+06	1.79943e+06
173	132.102	132.102	132.102	348.687	347.924	355.653	169	36	36	36	9	36	16	7.00373e+09	6.73126e+09	6.59285e+09	7.02196e+09	7.28334e+09	7.7868e+09	2.66973e+09	6.14411e+09	5.07786e+09	6.66574e+09	6.61361e+09	6.65826e+09	6.89799e+09	6.21719e+09	6.71334e+09	7.36519e+09	7.2186e+09	7.13808e+09	7.89767e+09	7.56884e+09	7.50848e+09	7.39984e+09	7.19467e+09	7.02543e+09	3.59036e+09	6.63787e+09	6.2902e+09	7.77526e+09	7.72084e+09	7.81371e+09	7.27384e+09	7.17988e+09	7.03438e+09	7.40719e+09	7.36392e+09	7.22755e+09
174	132.044	132.04	132.045	104.185	98.2755	117.02	154	36	31	34	9	28	16	1.1551e+07	1.13795e+07	1.14354e+07	1.12054e+07	1.15165e+07	1.18865e+07	5.44389e+06	1.03145e+07	9.25655e+06	1.015e+07	1.0102e+07	1.02505e+07	1.14749e+07	9.58491e+06	1.00263e+07	1.19378e+07	1.06031e+07	1.0587e+07	1.26879e+07	1.27622e+07	1.25948e+07	1.14204e+07	1.11165e+07	1.08352e+07	6.32646e+06	1.03323e+07	1.02475e+07	1.02288e+07	1.05941e+07	1.04941e+07	1.15721e+07	1.10069e+07	1.13357e+07	1.04975e+07	1.03509e+07	1.0034e+07
175	132.003	132	132.079	409.851	407.481	422.225	122	24	25	31	2	29	11	2.56185e+08	2.31753e+08	2.19795e+08	2.38849e+08	2.30845e+08	2.34786e+08	3.58851e+06	3.5115e+06	3.45258e+06	2.07471e+08	1.89619e+08	1.83738e+08	3.94323e+06	3.89534e+06	3.80288e+06	3.88736e+06	3.83948e+06	3.11527e+06	3.2146e+06	2.89651e+06	2.8562e+06	3.13384e+06	2.92305e+06	3.51221e+06	4.06218e+06	3.18177e+06	3.23801e+06	3.58778e+06	3.39248e+06	3.30299e+06	3.36665e+06	3.9977e+06	3.28282e+06	3.35577e+06	3.16819e+06	3.13814e+06
176	133.097	133.097	133.097	532.29	531.819	532.962	167	36	36	34	9	36	16	1.37455e+08	1.34024e+08	1.31112e+08	1.47043e+08	1.60844e+08	1.80226e+08	3.33631e+07	1.49024e+08	1.05567e+08	1.3453e+08	1.34893e+08	1.39019e+08	1.34755e+08	1.34583e+08	1.50171e+08	1.66899e+08	1.87632e+08	1.8303e+08	1.96395e+08	1.82152e+08	1.7985e+08	1.67671e+08	1.58873e+08	1.52654e+08	4.93962e+07	1.64808e+08	1.5593e+08	2.10896e+08	2.12454e+08	2.14305e+08	1.65443e+08	1.80008e+08	1.74004e+08	2.06458e+08	2.15559e+08	2.09909e+08
177	133.049	133.039	133.104	368.912	347.825	372.352	168	36	36	35	9	36	16	1.03222e+09	9.98446e+08	9.30128e+08	1.02852e+09	1.07287e+09	1.1472e+09	3.46822e+08	8.77797e+08	7.67628e+08	9.20227e+08	9.23155e+08	9.22308e+08	1.0539e+09	8.79429e+08	9.51403e+08	1.21046e+09	1.10715e+09	1.07134e+09	1.19694e+09	1.13496e+09	1.12733e+09	1.12528e+09	1.08162e+09	1.04913e+09	4.77649e+08	9.9753e+08	8.92855e+08	1.19446e+09	1.19097e+09	1.18285e+09	1.10384e+09	1.0594e+09	1.02335e+09	1.11855e+09	1.10115e+09	1.07293e+09
178	133.086	133.086	133.086	101.464	99.3691	102.627	49	5	13	6	0	25	0	4.98946e+06	5.03696e+06	4.98999e+06	8.9418e+06	9.92324e+06	1.10863e+07	2.67397e+06	5.94407e+06	4.96811e+06	6.23142e+06	6.75337e+06	7.25767e+06	6.79882e+06	6.16722e+06	6.74056e+06	1.89003e+07	1.83692e+07	1.88508e+07	1.68113e+07	1.68043e+07	1.72336e+07	1.15956e+07	1.10735e+07	1.14148e+07	9.27273e+06	1.98914e+07	1.92204e+07	5.64773e+06	5.8896e+06	6.42125e+06	9.59231e+06	9.37198e+06	1.00718e+07	4.53231e+06	4.50631e+06	4.60613e+06
179	134.019	134.019	134.019	418.77	418.223	429.795	169	36	36	36	9	36	16	1.89887e+08	1.97123e+08	2.02384e+08	1.87335e+08	2.14818e+08	2.44997e+08	2.17831e+07	9.10013e+07	7.4738e+07	1.57453e+08	1.68436e+08	1.79282e+08	8.87432e+07	8.23292e+07	9.76145e+07	1.03446e+08	1.07458e+08	1.14066e+08	8.45359e+07	8.65747e+07	8.94239e+07	1.16695e+08	1.21823e+08	1.22568e+08	2.51632e+07	7.50174e+07	7.63058e+07	9.66362e+07	1.03924e+08	1.10192e+08	6.28836e+07	6.76895e+07	7.04184e+07	7.83424e+07	8.51777e+07	8.89488e+07
180	134.064	134.046	134.078	368.365	364.957	371.919	167	36	36	34	9	36	16	6.09231e+07	6.33671e+07	6.08915e+07	6.65032e+07	6.93755e+07	7.51065e+07	1.93554e+07	5.74888e+07	4.37171e+07	5.96628e+07	6.06392e+07	6.01253e+07	5.83674e+07	5.62444e+07	6.03808e+07	6.39035e+07	6.07968e+07	6.29909e+07	6.61282e+07	6.99203e+07	7.11016e+07	6.08742e+07	6.19679e+07	6.23915e+07	2.73794e+07	5.85436e+07	5.61188e+07	6.59844e+07	6.63212e+07	6.53473e+07	6.08652e+07	6.57735e+07	6.38846e+07	6.25271e+07	6.58242e+07	6.12651e+07
181	134.06	134.06	134.061	139.2	136.331	142.636	167	36	36	34	9	36	16	5.26682e+07	5.25676e+07	5.15065e+07	5.81162e+07	6.315e+07	6.83575e+07	1.96727e+07	5.74715e+07	4.63661e+07	5.40488e+07	5.57993e+07	5.61047e+07	6.45275e+07	5.68945e+07	6.39077e+07	6.88137e+07	6.82727e+07	6.98975e+07	7.22392e+07	7.06699e+07	7.08553e+07	6.53067e+07	6.65821e+07	6.47147e+07	2.76327e+07	6.37524e+07	6.5152e+07	7.49195e+07	7.88928e+07	8.03285e+07	6.61701e+07	6.72479e+07	6.89395e+07	6.9686e+07	7.22748e+07	7.15317e+07
182	134.1	134.099	134.101	532.225	531.62	532.865	163	34	36	33	9	36	15	7.29792e+06	6.72765e+06	6.78466e+06	7.66413e+06	8.29252e+06	9.16152e+06	2.47604e+06	7.89196e+06	5.58461e+06	7.00939e+06	7.10978e+06	7.2435e+06	7.23876e+06	7.39305e+06	7.71567e+06	8.52332e+06	9.73311e+06	9.22891e+06	1.0112e+07	9.40837e+06	9.08712e+06	8.62105e+06	8.07309e+06	7.9761e+06	3.14567e+06	8.5953e+06	7.93355e+06	1.07868e+07	1.08873e+07	1.07079e+07	8.66569e+06	9.19099e+06	9.05554e+06	1.0661e+07	1.12071e+07	1.08336e+07
183	135.003	135.003	135.005	410.244	408.588	436.485	169	36	36	36	9	36	16	3.83036e+07	4.1237e+07	4.66634e+07	3.70976e+07	4.54486e+07	5.29096e+07	1.56256e+07	3.02356e+07	3.14446e+07	4.26914e+07	4.68834e+07	5.14941e+07	2.09587e+07	3.23698e+07	3.70421e+07	2.12017e+07	2.8469e+07	3.32554e+07	2.67036e+07	3.00309e+07	3.30309e+07	2.28222e+07	2.87875e+07	3.08202e+07	2.04719e+07	2.5872e+07	3.00898e+07	2.91575e+07	3.27152e+07	3.79421e+07	1.92609e+07	2.5458e+07	2.74225e+07	2.32295e+07	2.82376e+07	3.24409e+07
184	135.003	135.003	135.003	287.545	266.789	291.052	87	33	4	32	0	8	10	8.94505e+06	1.02313e+07	1.06456e+07	9.34932e+06	9.61981e+06	9.00939e+06	9.37045e+06	9.30583e+06	1.00441e+07	1.08264e+07	1.14971e+07	1.17609e+07	6.5987e+06	1.0485e+07	1.01616e+07	5.23563e+06	7.42147e+06	7.99803e+06	6.80009e+06	6.97608e+06	7.25514e+06	6.95671e+06	7.3547e+06	7.44573e+06	8.37861e+06	6.94795e+06	7.50067e+06	8.04334e+06	8.03117e+06	8.08627e+06	6.68468e+06	7.47392e+06	7.50735e+06	7.44902e+06	8.0832e+06	8.41641e+06
185	135.031	135.03	135.042	368.948	366.522	372.352	167	36	36	34	9	36	16	3.59213e+07	3.48497e+07	3.13115e+07	3.50078e+07	3.76005e+07	3.97485e+07	8.48286e+06	3.00673e+07	2.11392e+07	2.97031e+07	3.06303e+07	2.91964e+07	3.95155e+07	2.82048e+07	3.10021e+07	4.7712e+07	4.08139e+07	3.84095e+07	4.24329e+07	3.92639e+07	3.90272e+07	3.92325e+07	3.79235e+07	3.62771e+07	1.16991e+07	3.54919e+07	2.86105e+07	4.27435e+07	4.31441e+07	4.19096e+07	3.95353e+07	3.68695e+07	3.49201e+07	4.0329e+07	3.85516e+07	3.61015e+07
186	136.072	136.065	136.076	384.644	381.593	386.98	167	36	36	34	9	36	16	4.22579e+07	3.9942e+07	4.02985e+07	4.24052e+07	4.59054e+07	5.25839e+07	1.0242e+07	3.61426e+07	3.22088e+07	3.76674e+07	3.8423e+07	3.97948e+07	3.7099e+07	3.54308e+07	4.18613e+07	4.10097e+07	4.37235e+07	4.43194e+07	4.54624e+07	4.5231e+07	4.72064e+07	3.96694e+07	4.15328e+07	4.56373e+07	1.45386e+07	4.00412e+07	4.4954e+07	4.67437e+07	4.76168e+07	4.89758e+07	3.92583e+07	4.24267e+07	4.68957e+07	4.51215e+07	4.50561e+07	4.71459e+07
187	136.045	136.038	136.046	421.061	420.178	422.196	166	35	36	34	9	36	16	7.61679e+07	7.1075e+07	6.62275e+07	7.28409e+07	7.30343e+07	7.27834e+07	1.94295e+07	4.93942e+07	3.9147e+07	6.54167e+07	6.00258e+07	5.94314e+07	4.75584e+07	4.72822e+07	4.92102e+07	5.15695e+07	5.62083e+07	5.44482e+07	5.21564e+07	4.85295e+07	4.4912e+07	5.03138e+07	4.68122e+07	4.38437e+07	2.52795e+07	4.36205e+07	4.07717e+07	5.4916e+07	5.15478e+07	4.94165e+07	4.89033e+07	4.4541e+07	4.26093e+07	5.29748e+07	4.84198e+07	4.67222e+07
188	136.062	136.062	136.062	281.181	280.078	282.456	35	6	8	5	0	7	9	1.79403e+07	1.87318e+07	1.88686e+07	1.79566e+07	1.86273e+07	1.79632e+07	9.01462e+06	1.77296e+07	1.61155e+07	1.77859e+07	1.87536e+07	1.84763e+07	1.0587e+07	1.68391e+07	1.79997e+07	1.13464e+07	1.82562e+07	1.86603e+07	1.85029e+07	1.78002e+07	1.77549e+07	1.80563e+07	1.83206e+07	1.81507e+07	1.38485e+07	1.79595e+07	1.68312e+07	1.83997e+07	1.81706e+07	1.80516e+07	1.72467e+07	1.81148e+07	1.76383e+07	1.74514e+07	1.84219e+07	1.7988e+07
189	136.94	136.94	136.94	386.105	385.735	386.803	164	34	36	34	9	36	15	6.01714e+08	7.0104e+08	7.60043e+08	6.06285e+08	6.69731e+08	6.6099e+08	2.86397e+08	6.37565e+08	6.09541e+08	6.29987e+08	7.16336e+08	7.66827e+08	7.75877e+08	6.56972e+08	7.27972e+08	7.90759e+08	6.53841e+08	7.15439e+08	5.98288e+08	6.78557e+08	7.42524e+08	6.57285e+08	7.19098e+08	7.592e+08	3.6692e+08	6.87091e+08	7.04543e+08	5.51241e+08	6.32176e+08	6.64497e+08	5.81445e+08	6.78856e+08	7.24123e+08	5.37017e+08	6.51925e+08	7.22741e+08
190	137.046	137.046	137.053	207.772	206.977	208.104	169	36	36	36	9	36	16	3.50429e+09	3.37007e+09	3.27923e+09	2.79922e+09	2.93967e+09	3.15152e+09	4.33253e+08	1.26609e+09	1.03183e+09	2.53463e+09	2.53457e+09	2.56089e+09	1.65988e+09	1.53796e+09	1.68345e+09	1.49907e+09	1.54103e+09	1.52133e+09	1.87254e+09	1.81398e+09	1.78683e+09	1.4071e+09	1.38724e+09	1.34186e+09	6.68283e+08	1.40142e+09	1.35611e+09	2.00015e+09	2.01607e+09	2.05467e+09	1.53837e+09	1.52693e+09	1.52414e+09	1.75693e+09	1.7224e+09	1.71392e+09
191	137.071	137.071	137.071	355.552	351.862	360.973	160	36	36	36	0	36	16	1.172e+09	1.08985e+09	1.05354e+09	1.11398e+09	1.25874e+09	1.44267e+09	5.61524e+08	1.04268e+09	1.01364e+09	1.395e+09	1.47377e+09	1.49527e+09	8.74806e+08	1.1245e+09	1.16389e+09	1.16749e+09	1.35382e+09	1.32622e+09	3.3421e+08	3.0897e+08	3.14785e+08	4.80818e+08	4.8871e+08	5.10138e+08	4.51941e+08	8.79346e+08	8.83234e+08	9.50695e+08	9.69529e+08	9.9342e+08	4.77874e+08	4.85783e+08	4.93371e+08	1.11771e+09	1.10235e+09	1.08692e+09
192	137.985	137.984	138.004	500.391	495.409	502.62	162	31	36	34	9	36	16	4.87829e+06	4.63273e+06	4.52891e+06	4.71732e+06	4.94305e+06	5.30299e+06	1.82241e+06	4.07129e+06	3.53392e+06	4.56656e+06	4.50454e+06	4.69476e+06	4.043e+06	3.93193e+06	4.17859e+06	4.37475e+06	4.59931e+06	4.65471e+06	4.65014e+06	4.77044e+06	4.5575e+06	4.41944e+06	4.4609e+06	4.33845e+06	2.48583e+06	4.11952e+06	4.18746e+06	5.04816e+06	5.02174e+06	5.06349e+06	4.41849e+06	4.25536e+06	4.33684e+06	4.6291e+06	4.54905e+06	4.43605e+06
193	137.944	137.943	137.945	386.089	385.735	386.803	132	17	22	34	9	35	15	1.24654e+07	1.44937e+07	1.55161e+07	1.22668e+07	1.35624e+07	1.33856e+07	6.01866e+06	1.27835e+07	1.16614e+07	1.2865e+07	1.48364e+07	1.57091e+07	1.67131e+07	1.33526e+07	1.4913e+07	1.65954e+07	1.34e+07	1.48952e+07	1.2732e+07	1.41129e+07	1.54175e+07	1.36668e+07	1.46108e+07	1.57921e+07	7.62767e+06	1.37357e+07	1.40834e+07	1.11757e+07	1.28974e+07	1.34083e+07	1.23679e+07	1.42127e+07	1.48622e+07	1.07837e+07	1.37302e+07	1.46864e+07
194	138.05	138.049	138.052	207.736	206.977	208.104	167	36	36	34	9	36	16	1.94217e+08	1.86071e+08	1.81853e+08	1.54238e+08	1.63511e+08	1.74836e+08	2.51911e+07	7.00429e+07	5.71257e+07	1.40053e+08	1.40437e+08	1.41399e+08	9.14769e+07	8.54694e+07	9.38733e+07	8.34501e+07	8.54602e+07	8.42228e+07	1.04771e+08	1.0084e+08	1.00207e+08	7.83519e+07	7.79345e+07	7.47649e+07	3.79288e+07	7.86889e+07	7.56894e+07	1.1147e+08	1.1272e+08	1.14131e+08	8.52632e+07	8.59763e+07	8.56116e+07	9.83988e+07	9.59662e+07	9.57546e+07
195	138.067	138.066	138.075	298.823	281.525	301.722	166	35	36	34	9	36	16	9.6837e+06	1.02616e+07	1.06458e+07	9.97894e+06	1.06839e+07	1.0253e+07	3.0592e+06	8.93689e+06	7.37902e+06	9.79108e+06	1.03138e+07	1.08902e+07	8.9988e+06	9.03013e+06	9.71324e+06	1.0428e+07	1.04426e+07	1.08707e+07	1.31296e+07	1.39653e+07	1.39788e+07	1.30668e+07	1.35847e+07	1.37915e+07	5.65033e+06	1.28367e+07	1.20124e+07	1.34266e+07	1.44185e+07	1.55403e+07	1.25376e+07	1.32521e+07	1.34416e+07	1.28681e+07	1.40022e+07	1.43246e+07
196	138.07	138.066	138.073	357.438	352.669	362.673	153	36	31	34	0	36	16	1.12453e+08	1.04192e+08	9.72821e+07	1.04935e+08	1.15806e+08	1.36654e+08	4.79148e+07	9.38688e+07	8.82196e+07	1.26124e+08	1.30745e+08	1.30657e+08	8.02044e+07	1.00722e+08	1.01782e+08	1.04226e+08	1.2661e+08	1.23995e+08	3.60272e+07	3.19201e+07	3.33834e+07	4.63009e+07	4.67502e+07	4.79732e+07	4.10977e+07	8.06493e+07	7.80738e+07	9.21422e+07	9.2866e+07	9.43953e+07	4.90487e+07	4.75779e+07	4.7413e+07	1.09278e+08	1.0927e+08	1.02115e+08
197	138.069	138.067	138.084	95.8596	92.9444	104.303	57	26	14	7	0	9	1	1.03089e+07	9.50487e+06	9.35565e+06	9.26739e+06	9.20643e+06	9.62252e+06	6.85244e+06	9.40804e+06	8.13586e+06	9.22584e+06	9.17356e+06	8.64136e+06	1.10063e+07	8.99199e+06	9.25097e+06	1.10976e+07	9.70222e+06	9.48175e+06	9.46108e+06	9.33968e+06	9.5578e+06	7.21605e+06	6.71324e+06	6.59445e+06	5.7785e+06	7.23792e+06	7.36737e+06	8.62694e+06	9.00085e+06	9.29114e+06	8.43595e+06	7.63815e+06	8.00301e+06	8.03689e+06	7.68207e+06	7.8038e+06
198	138.939	138.938	138.943	386.061	385.442	386.534	167	36	36	34	9	36	16	9.10166e+07	1.07061e+08	1.16899e+08	9.09981e+07	1.01087e+08	1.00223e+08	5.10106e+07	9.83761e+07	9.44034e+07	9.55529e+07	1.08645e+08	1.16004e+08	1.21287e+08	1.01215e+08	1.11123e+08	1.21452e+08	1.00097e+08	1.10029e+08	9.28395e+07	1.05431e+08	1.1469e+08	1.01011e+08	1.11436e+08	1.17816e+08	6.02796e+07	1.06854e+08	1.09824e+08	8.338e+07	9.57112e+07	1.00554e+08	8.99369e+07	1.04396e+08	1.12413e+08	8.15285e+07	1.00235e+08	1.11283e+08
199	139.05	139.047	139.05	298.25	264.128	300.707	163	33	36	34	6	36	16	6.63767e+07	6.73847e+07	6.90923e+07	8.20512e+07	8.49719e+07	8.61306e+07	2.83883e+07	3.5335e+07	8.64911e+06	6.17972e+07	6.26167e+07	6.4544e+07	2.38418e+07	3.27506e+07	3.20121e+07	5.36856e+07	3.79778e+07	3.86952e+07	8.47537e+07	8.3609e+07	8.30033e+07	8.00752e+07	8.04673e+07	8.0687e+07	3.82405e+07	4.76231e+07	4.52104e+07	7.01212e+07	7.15905e+07	7.46897e+07	4.796e+07	4.80992e+07	4.89303e+07	4.33017e+07	4.52785e+07	4.47891e+07
200	139.941	139.94	139.942	386.101	385.64	386.725	167	36	36	34	9	36	16	1.90908e+06	2.10097e+06	2.27758e+06	1.76572e+06	2.20502e+06	1.93518e+06	1.01075e+06	1.86442e+06	1.90898e+06	1.9483e+06	2.14034e+06	2.41186e+06	2.37646e+06	1.96745e+06	2.34655e+06	2.53588e+06	2.01522e+06	2.23003e+06	1.95545e+06	1.98457e+06	2.28293e+06	2.05594e+06	2.31701e+06	2.53793e+06	1.1956e+06	2.05411e+06	2.29673e+06	1.64319e+06	1.98779e+06	2.06671e+06	1.73118e+06	2.11711e+06	2.2348e+06	1.46272e+06	2.03163e+06	2.24181e+06
201	140.002	140.002	140.002	654.529	652.098	658.646	166	35	36	34	9	36	16	5.38173e+08	5.57441e+08	5.46879e+08	5.37415e+08	5.72277e+08	5.7896e+08	6.42396e+08	4.80467e+08	4.87406e+08	5.55829e+08	5.81971e+08	5.66958e+08	6.43917e+08	5.28978e+08	5.4724e+08	6.2176e+08	5.32389e+08	5.37218e+08	5.92673e+08	5.99089e+08	6.02272e+08	5.7626e+08	5.96361e+08	5.807e+08	4.81766e+08	5.8301e+08	5.79378e+08	6.06368e+08	6.39962e+08	6.31971e+08	5.54741e+08	5.92443e+08	5.97367e+08	5.91186e+08	6.09274e+08	6.2798e+08
202	140.061	140.055	140.068	354.987	353.94	361.274	167	36	36	34	9	36	16	1.33831e+08	1.20422e+08	1.48079e+08	1.35406e+08	1.43852e+08	1.73125e+08	8.11283e+07	1.28986e+08	1.46124e+08	1.25495e+08	1.15505e+08	1.21534e+08	6.43558e+07	1.40329e+08	1.51286e+08	4.98004e+07	7.71133e+07	1.15962e+08	1.98882e+08	1.92191e+08	1.83833e+08	1.56254e+08	1.54944e+08	1.73182e+08	1.09133e+08	1.29553e+08	1.45038e+08	1.66809e+08	1.65273e+08	1.68666e+08	1.07581e+08	1.23082e+08	1.31184e+08	1.38606e+08	1.15979e+08	1.44782e+08
203	140.107	140.107	140.107	89.7521	86.5701	90.8101	167	36	36	34	9	36	16	3.09993e+08	2.93902e+08	2.90447e+08	3.14211e+08	3.23552e+08	3.50451e+08	1.14187e+08	2.59983e+08	2.04884e+08	3.07724e+08	3.05653e+08	3.10455e+08	4.20424e+08	2.87745e+08	3.20728e+08	4.21387e+08	3.21622e+08	3.28079e+08	3.13111e+08	3.1115e+08	3.07332e+08	3.11073e+08	3.01452e+08	3.05104e+08	1.33102e+08	2.95989e+08	3.11421e+08	3.07832e+08	3.29376e+08	3.32184e+08	3.0676e+08	2.96094e+08	3.16624e+08	3.12835e+08	2.9663e+08	3.15336e+08
204	140.104	140.103	140.104	270.848	269.342	273.021	35	8	6	7	0	5	9	2.74272e+07	2.82856e+07	2.63698e+07	2.79982e+07	2.95419e+07	2.9176e+07	5.75142e+06	2.31352e+07	1.90262e+07	2.8751e+07	2.92774e+07	2.94642e+07	1.55539e+07	2.48636e+07	2.77614e+07	2.3291e+07	3.002e+07	2.98386e+07	2.67744e+07	2.85454e+07	2.83639e+07	2.86936e+07	2.84098e+07	2.69837e+07	1.33024e+07	2.72511e+07	2.64782e+07	2.61179e+07	2.66483e+07	2.68055e+07	2.72267e+07	2.71568e+07	2.68749e+07	2.69901e+07	2.9007e+07	2.88157e+07
205	141.005	141.005	141.005	654.579	651.669	658.646	163	35	35	34	9	34	16	2.19243e+07	2.31494e+07	2.23648e+07	2.20175e+07	2.30449e+07	2.33733e+07	2.65283e+07	1.96714e+07	1.9326e+07	2.26709e+07	2.39133e+07	2.27045e+07	2.66877e+07	2.13603e+07	2.22669e+07	2.54581e+07	2.18091e+07	2.18676e+07	2.41683e+07	2.43227e+07	2.48841e+07	2.35036e+07	2.45699e+07	2.37729e+07	1.99387e+07	2.35679e+07	2.36404e+07	2.41404e+07	2.58669e+07	2.54064e+07	2.29684e+07	2.44266e+07	2.44189e+07	2.44832e+07	2.51989e+07	2.61108e+07
206	140.936	140.936	140.952	386.133	385.442	387.149	130	32	33	19	8	25	13	3.27151e+06	4.50032e+06	4.94462e+06	3.14614e+06	3.54195e+06	3.55303e+06	1.46681e+06	3.45281e+06	3.27871e+06	3.38442e+06	4.55152e+06	4.80907e+06	3.95429e+06	3.42375e+06	4.75648e+06	4.17797e+06	3.60083e+06	4.49128e+06	2.97401e+06	3.67494e+06	4.82478e+06	3.51189e+06	4.72483e+06	4.91216e+06	2.07095e+06	4.55171e+06	3.77924e+06	2.94438e+06	3.37552e+06	3.62428e+06	3.14755e+06	3.54933e+06	4.64484e+06	2.83499e+06	3.66347e+06	4.7562e+06
207	141.1	141.092	141.112	359.961	356.759	365.298	167	36	36	34	9	36	16	1.30072e+07	1.28429e+07	1.4845e+07	1.29199e+07	1.38652e+07	1.48733e+07	6.9679e+06	1.15953e+07	1.16535e+07	1.24635e+07	1.24424e+07	1.3305e+07	1.34993e+07	1.24293e+07	1.38331e+07	1.30621e+07	1.06226e+07	1.30483e+07	1.77655e+07	1.72549e+07	1.77402e+07	1.61063e+07	1.65296e+07	1.7697e+07	9.47795e+06	1.39955e+07	1.92795e+07	1.65402e+07	1.66807e+07	1.73306e+07	1.52514e+07	1.42105e+07	1.49319e+07	1.62983e+07	1.40091e+07	1.53547e+07
208	141.077	141.077	141.077	424.186	421.292	425.967	167	36	36	34	9	36	16	2.16498e+07	2.04215e+07	1.98534e+07	2.08716e+07	2.01804e+07	1.94592e+07	9.49192e+06	2.00461e+07	1.84368e+07	2.03967e+07	1.99949e+07	1.93276e+07	2.06294e+07	2.01435e+07	2.06461e+07	2.21938e+07	2.20032e+07	2.13471e+07	2.02917e+07	2.04477e+07	1.99993e+07	2.07431e+07	2.04866e+07	2.06215e+07	1.35776e+07	1.97693e+07	1.96436e+07	2.05856e+07	2.07554e+07	2.07806e+07	2.13903e+07	2.05218e+07	2.03696e+07	2.16254e+07	2.06534e+07	2.09445e+07
209	141.109	141.094	141.111	89.9961	86.8366	91.6106	167	36	36	34	9	36	16	2.70296e+07	2.58307e+07	2.56535e+07	2.78259e+07	2.81886e+07	3.07014e+07	1.07749e+07	2.27602e+07	1.8179e+07	2.70003e+07	2.65736e+07	2.69796e+07	3.66289e+07	2.54912e+07	2.7824e+07	3.69202e+07	2.81439e+07	2.82471e+07	2.76392e+07	2.6936e+07	2.67073e+07	2.7169e+07	2.61735e+07	2.66552e+07	1.20211e+07	2.59189e+07	2.70076e+07	2.67515e+07	2.85197e+07	2.94496e+07	2.66494e+07	2.58987e+07	2.74688e+07	2.73719e+07	2.56643e+07	2.77133e+07
210	142.064	142.061	142.078	374.014	372.786	375.559	167	36	36	34	9	36	16	1.2182e+07	1.4284e+07	1.4663e+07	1.16619e+07	1.38891e+07	1.44721e+07	4.22642e+06	1.10277e+07	9.59988e+06	1.03921e+07	1.32898e+07	1.39389e+07	1.19726e+07	1.14522e+07	1.36428e+07	1.31513e+07	1.45682e+07	1.49961e+07	1.25668e+07	1.3408e+07	1.47484e+07	1.30354e+07	1.40062e+07	1.48015e+07	4.77815e+06	1.28789e+07	1.28274e+07	1.23626e+07	1.42613e+07	1.47274e+07	1.11446e+07	1.3775e+07	1.34034e+07	1.11903e+07	1.3467e+07	1.3976e+07
211	142.035	142.035	142.035	633.454	630.138	651.728	168	36	36	35	9	36	16	7.77217e+07	7.81301e+07	7.45918e+07	8.09405e+07	8.77652e+07	9.14931e+07	3.43321e+07	5.43595e+07	4.55664e+07	8.17406e+07	8.31773e+07	8.23633e+07	8.0469e+07	6.36739e+07	7.08923e+07	8.37762e+07	7.38079e+07	7.36615e+07	9.51295e+07	9.41059e+07	9.31111e+07	8.61666e+07	8.81342e+07	8.47167e+07	4.49211e+07	8.14086e+07	8.04415e+07	1.01271e+08	1.04493e+08	1.06294e+08	9.15429e+07	8.87689e+07	8.89036e+07	1.00241e+08	9.78025e+07	9.73859e+07
212	142.061	142.061	142.061	333.885	330.756	339.328	164	34	36	34	9	36	15	1.14762e+07	1.15378e+07	1.09828e+07	1.05677e+07	1.24205e+07	1.30238e+07	2.09726e+06	9.06421e+06	7.27126e+06	9.92904e+06	1.1013e+07	1.06654e+07	9.24038e+06	8.55248e+06	1.02358e+07	1.07147e+07	1.18609e+07	1.23715e+07	7.81645e+06	7.97289e+06	7.75976e+06	6.7731e+06	7.18425e+06	7.06558e+06	1.99693e+06	6.62279e+06	5.60918e+06	8.14434e+06	8.5256e+06	8.88101e+06	6.3023e+06	7.53523e+06	7.08785e+06	6.72773e+06	7.45154e+06	7.46151e+06
213	142.941	142.939	142.941	500.925	496.685	503.693	167	36	36	34	9	36	16	3.04116e+07	3.20937e+07	3.20845e+07	3.0467e+07	3.25272e+07	3.29645e+07	1.75708e+07	3.07136e+07	3.03858e+07	3.00763e+07	3.18243e+07	3.19387e+07	2.3251e+07	3.04214e+07	3.19372e+07	2.43578e+07	3.1397e+07	3.22119e+07	3.09626e+07	3.17724e+07	3.14232e+07	3.10694e+07	3.00088e+07	3.14595e+07	2.21347e+07	3.08466e+07	3.13814e+07	3.17287e+07	3.26596e+07	3.28497e+07	2.73941e+07	3.05856e+07	3.09307e+07	2.782e+07	3.1324e+07	3.16072e+07
214	143.036	143.036	143.036	633.704	630.138	638.212	150	32	29	32	9	33	15	8.97344e+06	9.17611e+06	8.7907e+06	9.56796e+06	1.00489e+07	1.06764e+07	4.03076e+06	5.89041e+06	4.71903e+06	9.57095e+06	9.81912e+06	9.49133e+06	9.58516e+06	7.06365e+06	8.24159e+06	9.89242e+06	8.57801e+06	8.49933e+06	1.10829e+07	1.08499e+07	1.0923e+07	9.78233e+06	1.0054e+07	1.00299e+07	5.12518e+06	9.49527e+06	9.19922e+06	1.18525e+07	1.19746e+07	1.24777e+07	1.07029e+07	1.0362e+07	1.04425e+07	1.19616e+07	1.1499e+07	1.11196e+07
215	143.082	143.082	143.082	285.643	282.446	324.531	113	19	27	22	0	31	14	1.07161e+07	1.09478e+07	1.11431e+07	1.04571e+07	1.0965e+07	1.09478e+07	5.0881e+06	9.34936e+06	7.91366e+06	1.04466e+07	1.04663e+07	1.11189e+07	9.22306e+06	9.04546e+06	9.75874e+06	9.87394e+06	1.09165e+07	1.15087e+07	1.03328e+07	1.06989e+07	1.0019e+07	1.00099e+07	9.79209e+06	9.61311e+06	6.318e+06	9.24298e+06	9.03683e+06	1.02781e+07	1.07174e+07	1.08249e+07	1.0588e+07	9.91102e+06	9.41004e+06	1.09219e+07	1.05308e+07	1.06669e+07
216	144.062	144.055	144.116	385.975	373.861	387.192	167	36	36	34	9	36	16	8.29973e+07	7.44396e+07	6.74445e+07	7.72477e+07	6.78826e+07	6.48957e+07	5.53629e+07	5.50905e+07	4.12095e+07	8.20955e+07	7.58613e+07	7.16621e+07	7.6354e+07	5.63246e+07	5.29599e+07	8.15095e+07	6.44026e+07	5.41134e+07	5.99254e+07	4.7709e+07	4.28145e+07	6.06511e+07	5.14441e+07	4.6308e+07	3.87095e+07	5.33671e+07	3.93537e+07	7.3885e+07	6.41071e+07	5.70964e+07	6.32858e+07	5.58426e+07	4.02814e+07	6.68354e+07	5.04404e+07	4.31831e+07
217	144.102	144.098	144.102	429.058	427.695	429.769	157	33	35	31	9	33	16	9.59905e+06	9.33654e+06	8.95629e+06	9.60875e+06	9.56873e+06	9.79434e+06	1.3398e+07	8.35156e+06	7.54858e+06	9.2335e+06	9.29712e+06	9.18075e+06	1.70998e+07	8.23385e+06	8.4621e+06	1.76264e+07	8.94084e+06	8.74089e+06	1.56595e+07	1.5191e+07	1.51564e+07	1.4914e+07	1.41109e+07	1.42192e+07	8.29013e+06	1.37607e+07	1.3519e+07	1.57863e+07	1.60734e+07	1.62753e+07	1.51093e+07	1.4544e+07	1.42446e+07	1.56861e+07	1.51827e+07	1.49431e+07
218	144.087	144.084	144.09	340.313	338.651	347.817	145	28	34	30	7	33	13	2.28438e+07	2.35334e+07	2.31456e+07	2.24801e+07	2.50456e+07	2.83728e+07	2.69627e+07	2.06045e+07	1.66454e+07	2.10631e+07	2.17792e+07	2.23758e+07	3.06914e+07	1.86638e+07	2.16633e+07	3.31477e+07	2.42126e+07	2.50147e+07	2.51117e+07	2.6152e+07	2.72621e+07	1.95109e+07	2.24152e+07	2.30708e+07	1.15494e+07	2.10184e+07	1.97324e+07	2.61126e+07	2.68252e+07	2.6437e+07	2.1531e+07	2.25118e+07	2.5576e+07	2.15363e+07	2.50879e+07	2.37695e+07
219	144.982	144.982	144.984	159.189	156.884	161.954	67	0	34	0	0	32	1	64275.4	42616.7	63757.9	43210.8	46036.3	85462.1	20474.1	0	13449.5	54648.8	54783.4	52502.2	49196	24352.8	24347.3	49848	32148.6	41458.4	6143.18	12512.1	7718.1	11439.7	8851.93	2218.46	9147.65	2809.13	12546.2	31943.8	34268	21799.2	17438.5	15470.5	22503.4	17824.2	15486.7	5438.83
220	145.108	145.107	145.109	421.51	419.458	426.535	167	36	36	34	9	36	16	2.34161e+07	2.23561e+07	2.25378e+07	2.26189e+07	2.14261e+07	2.08348e+07	2.51478e+07	2.24806e+07	2.22182e+07	2.33697e+07	2.18616e+07	2.20004e+07	3.45088e+07	2.23681e+07	2.2826e+07	3.47129e+07	2.30561e+07	2.3199e+07	2.28624e+07	2.27731e+07	2.30745e+07	2.29334e+07	2.26396e+07	2.33865e+07	2.26633e+07	2.34336e+07	2.33832e+07	2.26602e+07	2.24955e+07	2.25384e+07	2.70375e+07	2.27062e+07	2.26285e+07	2.5589e+07	2.23495e+07	2.21932e+07
221	145.055	145.047	145.066	330.501	327.426	335.86	164	34	36	34	9	36	15	1.35792e+07	1.33094e+07	1.32713e+07	1.33637e+07	1.49263e+07	1.71432e+07	3.08085e+06	1.12457e+07	8.03255e+06	1.24052e+07	1.39422e+07	1.37264e+07	7.39783e+06	1.12812e+07	1.2479e+07	9.21253e+06	1.33707e+07	1.36365e+07	1.39423e+07	1.35368e+07	1.33057e+07	1.24854e+07	1.26378e+07	1.24609e+07	3.45374e+06	1.16617e+07	9.0814e+06	1.50676e+07	1.49345e+07	1.56764e+07	1.0316e+07	1.27975e+07	1.22505e+07	1.25932e+07	1.34611e+07	1.35832e+07
222	145.084	145.034	145.108	383.467	376.643	388.176	148	35	30	34	9	26	14	8.6323e+06	7.3795e+06	6.76433e+06	8.51732e+06	7.39373e+06	3.98373e+06	1.68936e+07	7.55323e+06	9.11704e+06	8.38376e+06	7.58269e+06	7.04178e+06	1.21226e+07	6.88027e+06	4.61716e+06	1.13315e+07	4.00043e+06	4.72672e+06	4.11543e+06	5.41771e+06	1.14702e+07	4.37592e+06	8.38106e+06	1.05599e+07	1.43548e+07	6.90171e+06	9.2854e+06	7.21356e+06	4.64413e+06	5.18361e+06	4.13272e+06	7.00601e+06	9.53245e+06	3.56591e+06	4.36215e+06	5.30605e+06
223	145.075	144.981	145.077	118.876	105.859	122.46	146	36	31	31	9	23	16	6.78933e+06	6.43126e+06	6.29701e+06	5.38131e+06	4.7972e+06	4.50242e+06	9.52143e+06	7.06701e+06	7.88945e+06	4.90109e+06	4.61022e+06	4.38327e+06	5.98959e+06	6.40446e+06	6.40488e+06	6.09746e+06	6.01523e+06	6.30676e+06	7.28063e+06	7.34502e+06	7.1832e+06	6.38851e+06	6.36831e+06	6.26324e+06	1.14427e+07	7.09298e+06	7.10245e+06	6.07786e+06	5.85048e+06	6.01687e+06	8.49847e+06	7.74511e+06	7.64029e+06	7.38248e+06	6.6048e+06	6.44176e+06
224	145.102	145.096	145.106	521.589	516.064	523.274	169	36	36	36	9	36	16	1.6562e+07	1.14616e+07	1.08185e+07	1.62754e+07	1.15604e+07	1.16293e+07	4.60537e+06	1.14496e+07	9.5748e+06	1.54729e+07	1.1522e+07	1.1243e+07	1.00951e+07	1.13089e+07	1.05222e+07	1.15161e+07	1.25444e+07	1.0932e+07	1.44782e+07	1.13631e+07	1.11655e+07	1.37039e+07	1.05836e+07	1.04786e+07	9.58294e+06	1.08365e+07	1.04759e+07	1.4616e+07	1.14495e+07	1.15124e+07	1.56907e+07	1.1524e+07	1.06448e+07	1.67524e+07	1.17813e+07	1.13235e+07
225	146.019	146.018	146.023	407.275	406.996	416.077	169	36	36	36	9	36	16	3.88986e+08	3.79573e+08	3.91319e+08	3.9215e+08	3.884e+08	4.13795e+08	2.67046e+08	3.78261e+08	3.46038e+08	3.82441e+08	3.87776e+08	4.03004e+08	4.10541e+08	3.64761e+08	3.80328e+08	4.21076e+08	3.97417e+08	3.9818e+08	4.1241e+08	4.04681e+08	4.00559e+08	3.95533e+08	3.8557e+08	3.9326e+08	2.695e+08	3.62619e+08	3.66218e+08	4.07373e+08	4.16585e+08	4.2572e+08	3.67897e+08	3.7705e+08	3.82738e+08	3.76669e+08	3.91741e+08	3.9015e+08
226	146.06	146.06	146.06	101.824	98.002	105.853	164	36	36	34	9	33	16	3.9194e+07	3.90043e+07	3.7992e+07	3.79323e+07	3.82124e+07	3.73493e+07	3.94295e+07	4.23824e+07	3.96872e+07	3.22361e+07	3.21145e+07	3.17215e+07	6.16821e+07	4.15559e+07	4.2905e+07	6.29144e+07	4.40296e+07	4.5773e+07	4.23358e+07	4.38853e+07	4.3723e+07	4.56802e+07	4.59881e+07	4.64259e+07	3.76995e+07	4.9085e+07	4.86718e+07	4.07253e+07	4.24019e+07	4.26003e+07	5.09535e+07	4.70867e+07	4.71316e+07	5.31231e+07	4.93427e+07	4.92445e+07
227	146.081	146.081	146.081	267.125	241.078	268.993	167	36	36	34	9	36	16	1.79423e+07	1.79705e+07	1.77781e+07	1.81197e+07	1.85549e+07	1.93809e+07	1.05332e+07	1.79349e+07	1.25557e+07	1.81679e+07	1.77915e+07	1.75906e+07	1.88851e+07	1.68369e+07	1.77243e+07	2.06783e+07	1.80703e+07	1.78711e+07	2.57642e+07	2.49373e+07	2.49304e+07	2.47234e+07	2.47628e+07	2.47806e+07	1.16138e+07	2.39479e+07	2.35006e+07	2.65028e+07	2.611e+07	2.62393e+07	2.35197e+07	2.50874e+07	2.44198e+07	2.44881e+07	2.46982e+07	2.46206e+07
228	146.062	146.06	146.075	345.9	341.577	354.376	141	28	36	26	1	35	15	1.42433e+07	1.4053e+07	1.29726e+07	1.57161e+07	1.80284e+07	2.03985e+07	4.31735e+06	1.20479e+07	8.37023e+06	1.30681e+07	1.30901e+07	1.32526e+07	1.14559e+07	1.21865e+07	1.44327e+07	1.43112e+07	1.78749e+07	1.71765e+07	1.59969e+07	1.49097e+07	1.41842e+07	1.49324e+07	1.52827e+07	1.36931e+07	4.36945e+06	1.38104e+07	1.10857e+07	1.74258e+07	1.83364e+07	1.85297e+07	1.32023e+07	1.41751e+07	1.32871e+07	1.64301e+07	1.72969e+07	1.7095e+07
229	146.101	146.092	146.104	439.532	437.525	441.716	132	27	27	30	9	24	15	1.03502e+08	1.01914e+08	1.00719e+08	1.06097e+08	1.0717e+08	1.09501e+08	6.4804e+07	8.23454e+07	7.34063e+07	1.00383e+08	9.95595e+07	9.94117e+07	1.07992e+08	7.87029e+07	8.18622e+07	1.13733e+08	8.75137e+07	8.63686e+07	8.72275e+07	8.63037e+07	8.62373e+07	8.53998e+07	8.43857e+07	8.4331e+07	5.96587e+07	7.50319e+07	7.42706e+07	1.013e+08	9.86954e+07	9.84167e+07	8.77184e+07	7.77051e+07	7.69581e+07	9.09734e+07	8.01698e+07	7.96344e+07
230	146.98	146.98	146.981	499.92	495.751	501.697	140	29	31	29	8	30	13	9.63061e+06	8.47376e+06	7.55688e+06	9.48845e+06	8.18098e+06	7.61538e+06	8.27025e+06	7.43181e+06	6.36838e+06	8.25185e+06	7.52287e+06	7.07968e+06	2.54582e+07	7.0956e+06	7.66523e+06	1.41798e+07	9.62914e+06	8.62243e+06	7.61722e+06	7.11108e+06	5.73597e+06	9.46192e+06	1.56364e+07	7.33521e+06	7.00347e+06	8.68308e+06	9.17589e+06	8.77842e+06	7.88088e+06	7.30201e+06	9.39799e+06	1.02473e+07	7.58156e+06	8.69252e+06	8.0036e+06	7.19216e+06
231	147.113	147.103	147.113	526.618	526.323	528.704	169	36	36	36	9	36	16	2.09751e+09	2.08133e+09	2.08037e+09	2.12347e+09	2.32854e+09	2.59661e+09	5.13429e+08	1.72976e+09	1.35217e+09	1.94454e+09	1.98845e+09	2.08128e+09	1.83619e+09	1.68697e+09	1.90803e+09	2.03657e+09	2.09319e+09	2.10736e+09	2.24827e+09	2.20175e+09	2.20517e+09	1.99476e+09	1.96702e+09	1.94927e+09	6.47317e+08	1.79184e+09	1.77043e+09	2.26981e+09	2.33805e+09	2.42007e+09	1.85589e+09	2.00494e+09	2.0238e+09	2.0579e+09	2.19443e+09	2.24754e+09
232	147.076	147.075	147.076	444.323	441.757	446.695	169	36	36	36	9	36	16	1.22528e+09	1.1755e+09	1.15138e+09	1.27494e+09	1.38624e+09	1.54511e+09	2.52322e+08	9.81889e+08	7.44618e+08	1.12429e+09	1.14914e+09	1.18537e+09	1.13555e+09	9.87859e+08	1.11742e+09	1.28276e+09	1.2721e+09	1.2557e+09	1.26664e+09	1.20719e+09	1.20573e+09	1.14571e+09	1.10376e+09	1.08325e+09	3.70256e+08	1.03306e+09	1.01694e+09	1.25058e+09	1.26539e+09	1.27644e+09	1.14833e+09	1.16041e+09	1.16449e+09	1.29036e+09	1.3152e+09	1.30174e+09
233	147.02	146.999	147.027	407.521	373.09	408.831	179	35	36	34	9	36	16	1.85033e+07	1.65318e+07	1.81866e+07	1.86264e+07	3.02422e+07	3.15001e+07	1.40237e+07	1.68202e+07	1.44614e+07	1.64134e+07	1.6901e+07	1.68439e+07	1.92893e+07	1.56321e+07	1.66223e+07	1.82833e+07	1.67827e+07	1.74827e+07	2.86269e+07	3.00159e+07	1.81434e+07	1.73736e+07	1.64352e+07	1.64046e+07	1.24076e+07	1.61723e+07	1.67772e+07	3.04984e+07	1.81025e+07	1.78371e+07	1.70869e+07	1.75846e+07	1.67151e+07	2.98742e+07	3.00426e+07	1.77075e+07
234	148.039	148.039	148.044	124.114	121.735	127.928	169	36	36	36	9	36	16	6.46002e+07	6.76102e+07	6.5048e+07	6.41655e+07	6.8671e+07	6.67758e+07	4.75659e+07	6.20277e+07	5.93605e+07	6.31302e+07	6.44528e+07	6.45864e+07	8.64594e+07	6.26875e+07	6.55059e+07	9.07227e+07	6.70476e+07	6.80857e+07	6.37513e+07	6.53948e+07	6.49775e+07	6.48608e+07	6.52691e+07	6.48978e+07	4.73572e+07	6.63001e+07	6.56241e+07	6.43121e+07	6.63299e+07	6.65144e+07	6.51951e+07	6.64838e+07	6.44943e+07	6.38304e+07	6.60004e+07	6.47291e+07
235	148.116	148.116	148.116	526.593	526.131	526.821	167	36	36	34	9	36	16	1.43493e+08	1.41138e+08	1.40159e+08	1.43703e+08	1.57085e+08	1.75551e+08	3.3915e+07	1.17608e+08	9.13444e+07	1.31374e+08	1.33489e+08	1.39841e+08	1.24925e+08	1.14477e+08	1.2827e+08	1.38255e+08	1.4171e+08	1.41558e+08	1.51056e+08	1.49115e+08	1.48303e+08	1.3414e+08	1.32489e+08	1.31555e+08	4.35222e+07	1.21166e+08	1.18822e+08	1.53484e+08	1.57084e+08	1.64689e+08	1.26298e+08	1.34816e+08	1.36229e+08	1.40138e+08	1.48818e+08	1.50614e+08
236	148.057	148.039	148.069	372.353	370.015	374.608	167	36	36	34	9	36	16	4.31953e+07	4.2393e+07	4.44751e+07	4.25342e+07	4.04864e+07	4.77865e+07	1.23246e+07	3.61461e+07	2.75395e+07	3.75396e+07	3.76335e+07	4.43785e+07	5.26157e+07	3.8346e+07	3.94544e+07	5.36855e+07	4.79602e+07	4.71953e+07	4.74086e+07	4.59017e+07	5.90591e+07	5.00027e+07	4.42954e+07	5.21065e+07	1.72192e+07	4.2306e+07	3.43558e+07	4.35163e+07	4.37383e+07	5.67846e+07	4.79079e+07	4.47334e+07	4.20784e+07	4.42567e+07	4.55225e+07	4.4366e+07
237	148.061	148.06	148.065	463.741	456.398	466.604	148	36	36	24	0	36	16	6.43898e+08	6.22254e+08	6.11509e+08	4.93379e+08	5.40405e+08	6.11468e+08	6.08163e+07	1.89556e+08	1.49095e+08	4.7818e+08	4.86455e+08	5.01272e+08	2.62089e+08	2.32794e+08	2.59047e+08	2.73244e+08	2.1639e+08	2.14289e+08	3.07799e+08	2.93102e+08	2.94182e+08	2.78877e+08	2.69628e+08	2.67819e+08	6.26852e+07	1.64151e+08	1.75957e+08	4.7468e+08	4.80204e+08	4.88158e+08	1.86276e+08	1.94976e+08	1.97124e+08	2.63572e+08	2.28404e+08	2.17547e+08
238	148.043	148.043	148.073	433.857	432.123	445.689	125	28	31	15	9	27	15	3.87483e+07	3.55204e+07	3.41121e+07	3.74373e+07	3.6554e+07	3.70238e+07	1.68429e+07	3.02833e+07	2.41406e+07	3.84365e+07	3.56834e+07	3.53776e+07	3.88077e+07	2.7837e+07	2.81758e+07	4.27555e+07	3.28542e+07	3.20394e+07	3.11894e+07	2.86831e+07	2.77833e+07	2.97539e+07	2.77741e+07	2.67312e+07	1.86373e+07	2.7234e+07	2.48643e+07	3.36142e+07	3.21947e+07	3.15963e+07	2.97279e+07	2.72949e+07	2.56828e+07	3.23196e+07	2.98514e+07	2.73954e+07
239	149.019	148.94	149.019	419.032	383.238	420.482	22	1	11	0	8	1	1	3.951e+07	3.95824e+07	3.88584e+07	3.97166e+07	3.99355e+07	3.77681e+07	1.77206e+07	4.32242e+07	4.65784e+07	4.06616e+07	4.1306e+07	4.07024e+07	1.54204e+07	4.33923e+07	4.38029e+07	1.52628e+07	4.10682e+07	4.27795e+07	4.08943e+07	4.25781e+07	4.14392e+07	4.27497e+07	4.22782e+07	4.23969e+07	4.90498e+07	4.30995e+07	4.31987e+07	4.07337e+07	4.02783e+07	4.09025e+07	4.19358e+07	4.26928e+07	4.33053e+07	4.22013e+07	4.22053e+07	4.10196e+07
240	149.116	149.113	149.116	526.48	526.17	526.803	165	34	36	34	9	36	16	8.49228e+06	8.04964e+06	8.20432e+06	8.38402e+06	8.94374e+06	1.01459e+07	2.30197e+06	6.71008e+06	5.54702e+06	7.693e+06	7.6882e+06	8.60565e+06	7.64825e+06	6.89432e+06	7.42837e+06	8.08376e+06	7.85575e+06	8.62534e+06	9.10953e+06	8.56606e+06	8.59758e+06	8.02787e+06	8.03894e+06	7.70303e+06	2.79472e+06	7.12145e+06	6.78838e+06	9.1287e+06	9.2413e+06	9.59519e+06	7.38911e+06	7.78759e+06	8.0726e+06	8.14144e+06	8.58713e+06	8.73459e+06
241	149.07	149.045	149.08	462.874	443.852	465.07	154	34	34	34	1	35	16	5.06223e+07	4.99501e+07	4.98551e+07	4.15692e+07	4.48666e+07	5.03281e+07	4.56621e+06	1.62563e+07	1.27271e+07	4.07254e+07	4.2019e+07	4.39751e+07	1.99768e+07	1.74889e+07	1.94279e+07	1.86132e+07	1.9079e+07	1.89245e+07	2.2303e+07	1.99999e+07	2.19984e+07	1.83411e+07	1.94101e+07	1.70665e+07	5.67392e+06	1.43724e+07	1.43299e+07	4.07476e+07	4.17002e+07	4.20799e+07	1.6862e+07	1.77573e+07	1.73507e+07	1.75678e+07	1.83118e+07	1.82611e+07
242	149.071	149.071	149.073	127.361	122.409	129.45	26	0	10	0	8	5	3	9.59643e+06	9.14408e+06	9.58015e+06	9.47708e+06	9.52785e+06	9.9519e+06	6.62268e+06	8.50134e+06	8.53736e+06	9.19903e+06	8.75178e+06	9.14185e+06	7.73648e+06	8.81096e+06	9.59068e+06	6.88193e+06	8.8478e+06	9.33745e+06	1.01181e+07	1.00431e+07	1.05029e+07	9.62367e+06	9.46701e+06	9.68542e+06	7.54127e+06	9.0416e+06	9.30359e+06	9.48235e+06	9.6451e+06	1.01798e+07	9.77934e+06	9.38292e+06	9.3637e+06	9.87084e+06	9.9066e+06	9.65569e+06
243	149.053	149.05	149.061	341.599	340.937	348.672	167	36	36	34	9	36	16	4.48049e+07	4.47166e+07	4.30287e+07	4.45255e+07	4.79453e+07	5.10185e+07	1.13772e+07	3.87161e+07	3.36689e+07	4.25037e+07	4.25277e+07	4.26945e+07	4.05711e+07	3.84869e+07	4.17713e+07	4.65027e+07	4.65005e+07	4.61221e+07	4.57659e+07	4.55772e+07	4.53792e+07	4.43141e+07	4.42649e+07	4.32682e+07	1.59199e+07	4.3628e+07	3.91832e+07	4.75338e+07	4.89718e+07	4.8384e+07	4.46277e+07	4.51396e+07	4.33026e+07	4.60273e+07	4.64384e+07	4.73393e+07
244	150.014	150.014	150.015	449.377	445.643	451.843	167	36	36	34	9	36	16	2.34527e+07	2.39038e+07	2.36634e+07	2.61827e+07	2.9198e+07	3.1396e+07	8.06249e+06	2.83241e+07	2.4734e+07	1.29531e+07	1.37277e+07	1.44369e+07	2.63321e+07	2.83852e+07	3.20734e+07	2.63038e+07	2.99976e+07	3.11568e+07	4.24263e+07	4.31061e+07	4.25193e+07	3.9181e+07	3.92753e+07	3.89591e+07	1.59382e+07	3.54414e+07	3.59568e+07	3.43482e+07	3.61809e+07	3.66356e+07	3.89243e+07	4.02257e+07	4.08231e+07	3.7485e+07	3.87481e+07	3.9602e+07
245	150.058	150.058	150.058	369.915	368.866	373.22	167	36	36	34	9	36	16	2.6628e+09	2.53418e+09	2.28945e+09	2.62825e+09	2.75563e+09	2.91679e+09	6.10028e+08	2.1782e+09	1.53776e+09	2.21723e+09	2.24301e+09	2.20864e+09	3.06754e+09	2.08431e+09	2.24559e+09	3.63969e+09	2.97935e+09	2.80133e+09	3.15955e+09	2.88745e+09	2.85834e+09	3.00239e+09	2.77161e+09	2.67925e+09	8.30877e+08	2.58026e+09	2.08075e+09	3.18036e+09	3.1572e+09	3.06666e+09	2.95146e+09	2.69175e+09	2.52233e+09	2.99328e+09	2.82489e+09	2.69203e+09
246	151.096	151.096	151.097	104.627	67.1439	105.862	174	36	36	34	9	36	16	6.13806e+07	6.09137e+07	5.97464e+07	7.36729e+07	8.13986e+07	9.29118e+07	3.31595e+07	7.73131e+07	6.27465e+07	9.17791e+07	9.57209e+07	1.00904e+08	9.84287e+07	7.93486e+07	9.00145e+07	6.52252e+07	6.10615e+07	6.46314e+07	6.03277e+07	6.42267e+07	6.17953e+07	5.30287e+07	5.28386e+07	5.40301e+07	3.96116e+07	9.10887e+07	8.27692e+07	9.28337e+07	9.53636e+07	9.95177e+07	7.78144e+07	7.6862e+07	7.86523e+07	7.90097e+07	7.80716e+07	8.03134e+07
247	151.049	151.047	151.056	443.967	441.511	446.405	167	36	36	34	9	36	16	8.47171e+07	8.41475e+07	8.33335e+07	8.88559e+07	9.77087e+07	1.05843e+08	6.7347e+06	6.74701e+07	4.92383e+07	7.76507e+07	8.09158e+07	8.23038e+07	6.36234e+07	6.71097e+07	7.62818e+07	7.28133e+07	8.73177e+07	8.75616e+07	9.30756e+07	9.01549e+07	8.98277e+07	8.39897e+07	8.29733e+07	8.03908e+07	1.83565e+07	7.47342e+07	7.19094e+07	8.92536e+07	9.10191e+07	9.17193e+07	8.21796e+07	8.59845e+07	8.61384e+07	8.93427e+07	9.21721e+07	9.3379e+07
248	151.061	151.054	151.062	370.122	369.688	373.22	167	36	36	34	9	36	16	1.46045e+08	1.41606e+08	1.33765e+08	1.45193e+08	1.52715e+08	1.60623e+08	5.3828e+07	1.31117e+08	1.01538e+08	1.21625e+08	1.25164e+08	1.23508e+08	2.05072e+08	1.27437e+08	1.40406e+08	2.18519e+08	1.69122e+08	1.64396e+08	1.80413e+08	1.73112e+08	1.76727e+08	1.78472e+08	1.71374e+08	1.71387e+08	6.06057e+07	1.64974e+08	1.41326e+08	1.75972e+08	1.75347e+08	1.70034e+08	1.74128e+08	1.64813e+08	1.60473e+08	1.67664e+08	1.62389e+08	1.60019e+08
249	151.084	151.084	151.085	494.691	492.427	496.909	158	33	35	33	9	33	15	5.52165e+07	5.62795e+07	5.71115e+07	5.47034e+07	5.62286e+07	5.58802e+07	9.67974e+06	5.64791e+07	5.8762e+07	5.48118e+07	5.59246e+07	5.61592e+07	9.58449e+06	5.62775e+07	5.78204e+07	9.68002e+06	5.66473e+07	5.78044e+07	5.62671e+07	5.68891e+07	5.72273e+07	5.67988e+07	5.78846e+07	5.83279e+07	5.9087e+07	5.76606e+07	5.69999e+07	5.62638e+07	5.63618e+07	5.69154e+07	5.49208e+07	5.6121e+07	5.64572e+07	5.45574e+07	5.58073e+07	5.57884e+07
250	151.065	151.063	151.067	188.078	187.344	188.426	143	33	26	34	0	35	15	2.47494e+07	2.40351e+07	2.27946e+07	2.52775e+07	2.616e+07	2.74584e+07	7.50314e+06	1.8488e+07	1.58823e+07	2.43006e+07	2.39977e+07	2.34937e+07	1.64408e+07	1.80466e+07	1.91884e+07	1.78831e+07	2.14996e+07	2.10318e+07	1.61172e+07	1.5375e+07	1.50157e+07	1.58271e+07	1.54789e+07	1.49088e+07	7.62093e+06	1.40316e+07	1.36097e+07	1.85264e+07	1.87072e+07	1.88338e+07	1.47184e+07	1.42499e+07	1.4043e+07	1.66513e+07	1.60454e+07	1.57409e+07
251	152.054	152.054	152.055	369.826	368.605	373.22	167	36	36	34	9	36	16	1.23838e+08	1.17799e+08	1.04728e+08	1.22008e+08	1.28279e+08	1.35604e+08	2.82296e+07	1.0125e+08	7.0617e+07	1.03181e+08	1.03713e+08	1.01673e+08	1.41629e+08	9.64627e+07	1.04696e+08	1.70178e+08	1.37466e+08	1.29732e+08	1.47027e+08	1.3433e+08	1.32005e+08	1.38001e+08	1.29375e+08	1.25102e+08	3.78318e+07	1.19711e+08	9.54027e+07	1.4877e+08	1.44215e+08	1.41952e+08	1.36949e+08	1.24684e+08	1.16117e+08	1.38869e+08	1.29969e+08	1.25034e+08
252	152.032	152.032	152.035	444.139	441.757	446.405	167	36	36	34	9	36	16	5.41008e+07	5.36192e+07	5.24969e+07	5.7005e+07	6.43858e+07	6.85134e+07	4.526e+06	4.31851e+07	3.05276e+07	4.99836e+07	5.12048e+07	5.2304e+07	4.24794e+07	4.23192e+07	4.96462e+07	4.7936e+07	5.60013e+07	5.60193e+07	6.05372e+07	5.88737e+07	5.7129e+07	5.33246e+07	5.36729e+07	5.18952e+07	1.04091e+07	4.72052e+07	4.64692e+07	5.70139e+07	5.92135e+07	5.95145e+07	5.31527e+07	5.50547e+07	5.50011e+07	5.8093e+07	5.88214e+07	5.89108e+07
253	152.071	152.071	152.071	139.411	136.331	142.903	167	36	36	34	9	36	16	3.14192e+08	3.13294e+08	3.07008e+08	3.44372e+08	3.75065e+08	4.05773e+08	1.21829e+08	3.37736e+08	2.76676e+08	3.23693e+08	3.33328e+08	3.36451e+08	3.85944e+08	3.38546e+08	3.82182e+08	4.11522e+08	4.02527e+08	4.10173e+08	4.32321e+08	4.21135e+08	4.21736e+08	3.88654e+08	3.94957e+08	3.85574e+08	1.65363e+08	3.78224e+08	3.8277e+08	4.47028e+08	4.68883e+08	4.70791e+08	3.96442e+08	4.01174e+08	4.05207e+08	4.15446e+08	4.27802e+08	4.24827e+08
254	153.059	152.948	153.063	370.358	366.287	372.569	166	36	36	34	9	36	15	6.72919e+06	7.03084e+06	6.52304e+06	6.84814e+06	7.58688e+06	8.00572e+06	588899	6.44809e+06	5.27231e+06	6.0287e+06	6.19411e+06	6.25198e+06	8.87183e+06	6.6104e+06	7.15945e+06	9.4833e+06	8.2297e+06	7.74174e+06	8.8893e+06	8.62413e+06	8.79372e+06	8.71941e+06	8.55761e+06	8.4635e+06	3.55231e+06	8.6073e+06	1.38951e+07	8.57711e+06	8.03311e+06	8.38255e+06	8.6255e+06	8.22442e+06	8.30637e+06	8.24164e+06	8.19259e+06	8.36653e+06
255	153.043	153.041	153.049	251.018	248.633	251.673	166	35	36	34	9	36	16	3.09748e+07	3.16533e+07	3.06285e+07	2.75031e+07	3.0301e+07	3.20822e+07	3.55565e+06	1.47253e+07	1.26845e+07	2.3745e+07	2.49376e+07	2.57753e+07	1.66228e+07	1.70584e+07	1.81848e+07	1.63177e+07	1.79827e+07	1.78794e+07	1.42975e+07	1.43952e+07	1.42998e+07	1.24718e+07	1.26726e+07	1.2793e+07	1.04411e+06	1.13426e+07	1.16696e+07	1.56642e+07	1.65401e+07	1.66116e+07	1.13468e+07	1.16424e+07	1.21141e+07	1.28058e+07	1.36364e+07	1.36786e+07
256	153.074	153.072	153.075	138.987	136.058	142.636	167	36	36	34	9	36	16	2.50244e+07	2.47792e+07	2.45519e+07	2.73225e+07	2.97315e+07	3.22183e+07	1.01024e+07	2.75443e+07	2.26192e+07	2.59219e+07	2.63449e+07	2.6892e+07	3.05563e+07	2.76724e+07	3.10329e+07	3.3029e+07	3.23096e+07	3.306e+07	3.44037e+07	3.3839e+07	3.35072e+07	3.11514e+07	3.15709e+07	3.08569e+07	1.32477e+07	3.012e+07	3.05496e+07	3.5757e+07	3.74036e+07	3.76307e+07	3.16124e+07	3.22528e+07	3.22244e+07	3.36284e+07	3.53251e+07	3.48565e+07
257	153.045	153.014	153.047	444.346	431.874	485.183	107	18	17	22	9	28	13	4.05261e+06	4.06187e+06	3.87666e+06	4.11861e+06	4.49935e+06	4.64713e+06	1.70622e+06	3.28201e+06	2.6556e+06	3.72022e+06	3.85498e+06	3.87249e+06	3.50171e+06	3.30646e+06	3.7486e+06	2.46335e+06	3.9347e+06	2.91041e+06	4.51726e+06	4.35321e+06	4.22687e+06	2.77025e+06	2.85075e+06	2.46544e+06	1.85959e+06	2.46648e+06	3.50216e+06	4.06286e+06	4.35736e+06	4.04768e+06	2.84026e+06	4.08604e+06	4.19636e+06	2.80655e+06	4.30862e+06	4.1556e+06
258	154.005	154.003	154.005	655.126	652.419	658.465	88	20	10	24	8	19	7	1.33071e+07	1.38944e+07	1.33744e+07	1.3463e+07	1.38742e+07	1.40884e+07	1.68031e+07	1.21836e+07	1.19133e+07	1.3309e+07	1.40847e+07	1.4094e+07	1.8749e+07	1.35099e+07	1.3529e+07	1.82052e+07	1.32305e+07	1.33421e+07	1.46647e+07	1.48004e+07	1.48085e+07	1.43879e+07	1.46082e+07	1.45674e+07	1.20706e+07	1.45098e+07	1.4165e+07	1.50414e+07	1.57308e+07	1.55001e+07	1.39001e+07	1.46609e+07	1.43663e+07	1.4316e+07	1.48608e+07	1.50023e+07
259	154.059	154.056	154.059	421.016	420.016	422.196	167	36	36	34	9	36	16	1.12345e+08	1.02822e+08	9.70442e+07	1.0601e+08	1.04322e+08	1.07853e+08	1.65068e+07	6.83492e+07	5.19657e+07	9.36605e+07	8.58468e+07	8.39514e+07	6.76731e+07	6.61279e+07	6.8137e+07	7.38289e+07	7.93374e+07	7.64869e+07	7.38022e+07	6.74866e+07	6.21605e+07	7.10537e+07	6.39103e+07	5.97029e+07	2.65422e+07	5.82228e+07	5.3691e+07	7.81613e+07	7.20236e+07	6.93455e+07	6.71789e+07	5.96283e+07	5.63653e+07	7.41485e+07	6.67338e+07	6.33773e+07
260	154.069	154.065	154.074	95.6134	91.1014	95.8525	12	2	1	0	9	0	0	3.97911e+06	3.95906e+06	3.81395e+06	4.00675e+06	3.91052e+06	3.8967e+06	7.62743e+06	4.44354e+06	4.64632e+06	3.95687e+06	3.92125e+06	3.65444e+06	6.02229e+06	3.918e+06	3.94157e+06	6.6769e+06	4.13384e+06	4.06508e+06	5.51569e+06	5.38488e+06	5.37979e+06	5.20039e+06	5.02754e+06	5.18871e+06	7.08854e+06	4.99142e+06	4.90631e+06	5.0383e+06	5.17908e+06	5.072e+06	5.74017e+06	5.372e+06	5.11517e+06	5.51089e+06	5.07841e+06	4.97821e+06
261	155.09	154.994	155.129	342.256	337.789	373.822	176	36	36	34	9	36	16	2.95798e+07	1.58986e+07	3.92286e+07	3.34617e+07	3.24726e+07	2.79514e+07	8.54961e+06	2.13309e+07	1.01548e+07	1.72941e+07	3.57988e+07	3.67845e+07	2.62529e+07	2.27648e+07	2.4992e+07	1.24576e+07	1.93496e+07	2.17746e+07	1.07722e+07	1.23637e+07	1.27916e+07	1.07505e+07	1.22303e+07	1.23546e+07	4.73566e+06	1.09299e+07	1.11286e+07	1.17013e+07	1.37639e+07	1.42945e+07	9.58123e+06	1.16707e+07	1.19568e+07	1.14599e+07	1.20538e+07	1.27271e+07
262	155.045	154.999	155.045	501.486	486.879	503.425	105	21	21	23	6	23	11	1.79881e+06	2.03502e+06	2.32883e+06	1.94898e+06	2.34244e+06	2.81803e+06	1.62217e+06	1.79702e+06	1.7954e+06	1.8491e+06	2.14076e+06	2.46281e+06	2.15373e+06	1.82105e+06	2.0481e+06	1.8982e+06	1.94019e+06	2.05716e+06	2.06342e+06	2.40427e+06	2.44608e+06	1.81938e+06	3.84658e+06	2.01924e+06	980341	1.86602e+06	1.94477e+06	2.04211e+06	2.35848e+06	2.5913e+06	1.49701e+06	2.00001e+06	2.16283e+06	1.67637e+06	2.1327e+06	2.31684e+06
263	155.078	155.034	155.079	459.163	421.613	462.411	168	36	36	34	9	36	16	1.84036e+07	1.7895e+07	1.74789e+07	1.79884e+07	1.78385e+07	1.73364e+07	1.19187e+07	1.51288e+07	1.5512e+07	1.76457e+07	1.73396e+07	1.71939e+07	1.52294e+07	1.51322e+07	1.59208e+07	1.67502e+07	1.64883e+07	1.6905e+07	1.71718e+07	1.74408e+07	1.78374e+07	1.71808e+07	1.76261e+07	1.80721e+07	1.54524e+07	1.69657e+07	1.71283e+07	1.70483e+07	1.71444e+07	1.7415e+07	1.86925e+07	1.67567e+07	1.70145e+07	1.79688e+07	1.66297e+07	1.70032e+07
264	156.043	156.001	156.045	385.531	382.633	387.409	168	36	36	35	9	36	16	4.94325e+07	4.80024e+07	4.79017e+07	5.0191e+07	5.54571e+07	6.2727e+07	3.93117e+07	4.70996e+07	4.69129e+07	4.76633e+07	4.91025e+07	5.05604e+07	5.25564e+07	4.28565e+07	4.54933e+07	6.18854e+07	5.13521e+07	5.15413e+07	5.41369e+07	5.30557e+07	5.36674e+07	4.8213e+07	4.89452e+07	4.8615e+07	4.00348e+07	4.52066e+07	1.72104e+08	5.70092e+07	5.94895e+07	6.42007e+07	4.69342e+07	5.00322e+07	4.95156e+07	5.12766e+07	5.39177e+07	5.40768e+07
265	156.043	155.974	156.045	352.318	320.826	360.178	152	33	34	30	8	33	14	2.88952e+07	2.4171e+07	3.0616e+07	2.90882e+07	3.20227e+07	3.86668e+07	1.16052e+07	2.62402e+07	2.68325e+07	2.42636e+07	2.13239e+07	2.31276e+07	4.35905e+07	2.98666e+07	3.42645e+07	1.26209e+07	1.69838e+07	2.56475e+07	4.44301e+07	4.34906e+07	4.13723e+07	3.7565e+07	3.83596e+07	4.07667e+07	1.37557e+07	2.90499e+07	6.94771e+07	3.77405e+07	3.65191e+07	3.7984e+07	2.33129e+07	2.65356e+07	2.83616e+07	3.08912e+07	2.33249e+07	3.25959e+07
266	156.077	156.077	156.077	196.466	195.077	198.332	109	26	18	23	9	18	15	3.48833e+07	3.35727e+07	3.21864e+07	3.35483e+07	3.22219e+07	3.12934e+07	1.85896e+07	3.28624e+07	3.15878e+07	3.46662e+07	3.33826e+07	3.29759e+07	3.40174e+07	3.06251e+07	3.09429e+07	3.65994e+07	3.34468e+07	3.32929e+07	1.70895e+07	1.68228e+07	1.69085e+07	1.71138e+07	1.69988e+07	1.70376e+07	1.2669e+07	1.61807e+07	1.62248e+07	1.82348e+07	1.78448e+07	1.82442e+07	1.72853e+07	1.58754e+07	1.62444e+07	1.83185e+07	1.67135e+07	1.6631e+07
267	156.077	156.072	156.077	519.442	507.037	529.695	167	36	36	34	9	36	16	3.17484e+08	3.17514e+08	3.18297e+08	3.44004e+08	4.06252e+08	4.50285e+08	6.96852e+07	2.63873e+08	1.79863e+08	2.97481e+08	3.20473e+08	3.37057e+08	2.19343e+08	2.53216e+08	2.89018e+08	2.41279e+08	3.23441e+08	3.08565e+08	3.87033e+08	3.52287e+08	3.36932e+08	2.96529e+08	2.61839e+08	2.58535e+08	8.579e+07	2.48595e+08	2.27446e+08	3.80775e+08	3.81308e+08	3.77106e+08	2.41262e+08	3.0257e+08	2.91463e+08	2.84657e+08	3.58627e+08	3.41833e+08
268	156.984	156.962	156.984	195.394	193.032	202.936	142	30	33	29	6	31	13	2.71271e+06	3.1412e+06	3.73069e+06	2.95647e+06	4.24864e+06	4.52163e+06	2.14469e+06	3.17724e+06	4.12767e+06	3.31671e+06	4.44912e+06	4.30206e+06	2.09741e+06	3.80399e+06	4.13576e+06	2.10359e+06	3.69518e+06	4.21075e+06	3.5232e+06	4.84751e+06	5.03842e+06	4.0625e+06	4.31766e+06	5.09538e+06	4.87826e+06	3.80256e+06	4.86465e+06	3.54818e+06	4.438e+06	4.66979e+06	3.07532e+06	3.76139e+06	4.27617e+06	3.02748e+06	4.08661e+06	5.07747e+06
269	156.984	156.984	156.984	264.319	258.266	269.035	83	11	26	11	1	21	13	3.06446e+06	3.60438e+06	3.39904e+06	3.05005e+06	3.70464e+06	3.81403e+06	519057	2.67439e+06	2.37663e+06	2.97687e+06	3.35713e+06	3.66333e+06	2.44839e+06	2.49997e+06	3.14496e+06	2.84378e+06	3.05565e+06	3.53091e+06	3.31033e+06	3.64862e+06	3.58514e+06	3.09213e+06	3.31554e+06	3.41488e+06	880350	2.82911e+06	2.98088e+06	3.38291e+06	3.79616e+06	4.28771e+06	2.58301e+06	3.35159e+06	3.33997e+06	2.80275e+06	3.32673e+06	3.64597e+06
270	157.076	157.074	157.077	99.7362	97.4552	101.638	166	36	36	34	9	35	16	2.05675e+07	2.04522e+07	1.96194e+07	1.60243e+07	1.61064e+07	1.61738e+07	1.14234e+07	1.99249e+07	1.74635e+07	1.47096e+07	1.5012e+07	1.51303e+07	2.38299e+07	1.82337e+07	1.87753e+07	2.46983e+07	1.93826e+07	1.94098e+07	2.30428e+07	2.31267e+07	2.22941e+07	1.89105e+07	1.86783e+07	1.85602e+07	1.27619e+07	2.03358e+07	1.94659e+07	1.8499e+07	1.83344e+07	1.83042e+07	2.45054e+07	2.31824e+07	2.26581e+07	2.14745e+07	1.9918e+07	1.93595e+07
271	157.074	157.044	157.084	373.057	370.069	386.933	167	36	36	34	9	36	16	7.87396e+06	7.54564e+06	7.89767e+06	6.86794e+06	7.724e+06	8.2032e+06	1.80114e+06	6.73024e+06	6.79171e+06	6.86762e+06	6.87683e+06	7.41001e+06	6.3741e+06	6.83332e+06	7.64756e+06	6.1259e+06	7.37389e+06	7.84704e+06	5.45101e+06	8.19397e+06	8.69416e+06	8.45898e+06	8.72425e+06	8.36695e+06	1.89619e+06	7.06378e+06	7.81911e+06	8.47984e+06	8.16918e+06	8.9025e+06	2.28933e+06	6.79976e+06	7.21807e+06	4.44287e+06	6.86146e+06	7.95506e+06
272	157.083	157.081	157.088	521.369	507.574	529.114	166	35	36	34	9	36	16	1.93639e+07	1.97686e+07	2.00713e+07	2.05085e+07	2.57589e+07	2.97903e+07	5.83849e+06	1.56954e+07	1.04924e+07	1.84162e+07	1.9874e+07	2.1343e+07	1.39365e+07	1.51637e+07	1.81425e+07	1.49189e+07	2.03477e+07	1.97843e+07	2.37946e+07	2.23488e+07	2.15033e+07	1.81564e+07	1.68291e+07	1.6882e+07	5.34302e+06	1.48894e+07	1.43762e+07	2.37151e+07	2.40981e+07	2.51094e+07	1.48589e+07	1.91152e+07	1.85261e+07	1.76173e+07	2.24899e+07	2.17353e+07
273	158.012	158.012	158.012	654.756	652.369	658.646	165	35	36	34	9	35	16	1.97508e+08	2.04708e+08	1.96302e+08	1.96199e+08	2.08167e+08	2.07236e+08	2.39676e+08	1.77598e+08	1.80724e+08	2.03879e+08	2.14365e+08	2.05527e+08	2.35844e+08	1.93353e+08	2.00241e+08	2.30565e+08	1.95867e+08	1.95757e+08	2.1358e+08	2.17395e+08	2.18395e+08	2.10001e+08	2.18014e+08	2.10431e+08	1.85236e+08	2.15687e+08	2.13186e+08	2.20052e+08	2.30308e+08	2.27161e+08	2.10454e+08	2.17904e+08	2.20283e+08	2.22458e+08	2.25753e+08	2.29824e+08
274	158.093	158.093	158.098	524.766	523.821	525.091	167	36	36	34	9	36	16	3.08227e+07	3.10847e+07	3.00604e+07	3.06995e+07	3.33057e+07	3.54307e+07	1.1333e+07	2.72982e+07	2.34876e+07	2.92198e+07	3.03786e+07	3.08827e+07	2.66981e+07	2.6645e+07	2.95632e+07	2.86504e+07	3.04868e+07	3.0911e+07	3.22041e+07	3.1887e+07	3.16632e+07	2.87662e+07	2.9456e+07	2.89287e+07	1.35072e+07	2.80122e+07	2.77084e+07	3.14687e+07	3.33993e+07	3.3789e+07	2.72003e+07	2.93195e+07	2.9876e+07	2.96665e+07	3.18563e+07	3.25681e+07
275	158.116	158.114	158.129	324.747	322.267	360.889	170	36	36	34	9	36	16	9.49492e+07	9.39555e+07	9.02834e+07	9.71e+07	1.05322e+08	1.13853e+08	2.90308e+07	8.15321e+07	6.33008e+07	9.25e+07	9.38297e+07	9.32529e+07	1.04439e+08	9.02785e+07	1.02977e+08	1.04442e+08	1.04694e+08	1.06571e+08	1.04642e+08	1.00988e+08	1.01627e+08	1.02727e+08	1.02013e+08	1.02115e+08	3.96265e+07	1.02448e+08	1.00398e+08	1.01434e+08	1.02573e+08	1.06016e+08	1.00365e+08	1.01047e+08	1.02552e+08	1.0277e+08	1.03316e+08	1.04111e+08
276	158.118	158.118	158.13	271.385	268.855	294.643	168	36	36	35	9	36	16	5.46882e+08	5.82543e+08	5.59615e+08	5.98405e+08	6.21227e+08	6.10374e+08	1.51449e+08	4.65141e+08	3.59716e+08	5.8364e+08	5.99831e+08	5.99346e+08	5.25344e+08	5.07338e+08	5.70297e+08	5.34256e+08	6.05587e+08	6.15582e+08	5.17204e+08	5.6867e+08	5.75187e+08	5.94427e+08	5.7878e+08	5.54817e+08	2.43631e+08	5.52896e+08	5.35396e+08	4.96296e+08	5.00574e+08	5.09108e+08	5.65367e+08	5.62357e+08	5.51621e+08	5.22148e+08	5.79051e+08	5.84643e+08
277	158.913	158.912	158.914	501.086	496.429	503.319	154	31	34	31	8	35	15	1.01835e+06	1.11536e+06	1.0622e+06	1.0497e+06	1.11046e+06	1.14676e+06	866602	994137	969512	1.03931e+06	1.09748e+06	1.06493e+06	1.14588e+06	1.01762e+06	1.0468e+06	1.22449e+06	1.03695e+06	1.08938e+06	1.03515e+06	1.12316e+06	1.03321e+06	1.11454e+06	1.01064e+06	1.0012e+06	725463	1.00169e+06	1.02891e+06	1.09132e+06	1.15102e+06	1.09146e+06	979687	986199	1.05433e+06	1.03857e+06	1.03308e+06	1.02611e+06
278	159.016	159.015	159.016	654.941	651.905	659.003	136	25	27	31	9	30	14	8.14976e+06	8.11304e+06	7.82468e+06	7.8175e+06	8.58229e+06	8.10183e+06	9.73283e+06	7.1283e+06	7.09738e+06	8.0832e+06	8.81091e+06	8.10139e+06	1.07914e+07	7.70638e+06	8.09373e+06	1.07678e+07	8.0326e+06	8.14005e+06	8.6183e+06	8.92899e+06	8.68849e+06	8.10817e+06	8.90384e+06	8.01117e+06	7.6079e+06	8.65584e+06	8.66279e+06	8.84703e+06	9.40005e+06	9.19161e+06	8.41509e+06	8.64195e+06	8.74169e+06	9.06359e+06	9.2256e+06	9.0703e+06
279	159.099	159.092	159.107	343.093	328.258	351.452	167	36	36	34	9	36	16	2.2587e+07	2.27259e+07	2.12651e+07	1.97585e+07	2.25364e+07	2.7124e+07	4.22474e+06	1.85265e+07	1.56594e+07	1.95828e+07	2.28016e+07	2.2654e+07	2.10766e+07	2.09614e+07	2.45574e+07	2.40304e+07	2.36327e+07	2.43157e+07	2.74569e+07	2.61212e+07	2.50014e+07	2.26153e+07	2.46484e+07	2.52031e+07	8.48841e+06	2.44867e+07	2.3189e+07	2.35605e+07	2.34801e+07	2.35033e+07	2.24964e+07	2.49621e+07	2.49487e+07	2.18924e+07	2.43302e+07	2.36636e+07
280	159.03	159.02	159.036	206.633	205.334	207.489	160	35	36	35	9	29	16	2.29468e+07	2.04746e+07	1.97007e+07	1.58608e+07	1.63279e+07	1.83715e+07	1.66557e+06	5.09626e+06	3.98119e+06	1.31265e+07	1.24304e+07	1.23212e+07	4.40983e+06	6.37466e+06	6.71023e+06	3.87176e+06	5.45007e+06	5.36055e+06	8.1319e+06	7.3295e+06	6.95675e+06	5.17589e+06	5.14005e+06	4.7803e+06	2.8217e+06	4.92504e+06	4.4546e+06	8.7436e+06	8.62498e+06	8.78575e+06	6.24118e+06	5.48795e+06	5.54951e+06	7.13884e+06	6.96755e+06	6.67539e+06
281	159.12	159.052	159.127	271.204	243.167	294.908	180	36	36	34	9	36	16	4.6957e+07	4.95254e+07	4.78053e+07	5.01789e+07	5.28856e+07	5.35922e+07	1.24957e+07	4.06233e+07	3.13851e+07	4.99095e+07	5.14131e+07	5.14299e+07	4.4657e+07	4.39664e+07	4.93763e+07	4.56537e+07	5.26475e+07	5.32471e+07	4.46128e+07	4.91699e+07	4.94162e+07	5.12725e+07	4.96554e+07	4.77429e+07	2.16106e+07	4.80395e+07	4.6858e+07	4.29595e+07	4.33977e+07	4.40359e+07	4.86164e+07	4.86756e+07	4.75188e+07	4.54496e+07	5.0193e+07	5.05297e+07
282	159.097	159.018	159.106	378.817	371.706	380.778	157	36	32	31	9	34	15	9.68342e+06	1.03211e+07	1.06087e+07	9.73644e+06	9.70795e+06	1.03861e+07	4.87116e+06	9.9055e+06	8.93327e+06	9.82163e+06	1.0094e+07	1.0848e+07	8.94909e+06	1.00002e+07	1.0616e+07	1.08915e+07	1.06891e+07	1.14866e+07	9.46223e+06	1.08266e+07	1.13022e+07	1.08287e+07	1.06038e+07	1.16252e+07	7.22863e+06	1.0772e+07	7.29438e+06	9.35289e+06	1.00975e+07	1.07667e+07	1.10913e+07	1.07684e+07	1.12116e+07	1.03938e+07	9.468e+06	1.08407e+07
283	159.083	159.081	159.084	456.242	428.548	458.75	122	19	29	26	1	33	14	1.58764e+07	1.62523e+07	1.57478e+07	1.56302e+07	1.69344e+07	1.7941e+07	3.95123e+06	1.32924e+07	1.10824e+07	1.50462e+07	1.55612e+07	1.61746e+07	1.12201e+07	1.28182e+07	1.41765e+07	1.21992e+07	1.50213e+07	1.54442e+07	1.42158e+07	1.43527e+07	1.43025e+07	1.28429e+07	1.35869e+07	1.34546e+07	5.80379e+06	1.24052e+07	1.24053e+07	1.52247e+07	1.5626e+07	1.59432e+07	1.21895e+07	1.33268e+07	1.33806e+07	1.28845e+07	1.38004e+07	1.39385e+07
284	159.089	159.087	159.091	99.6603	96.7319	102.956	102	36	8	34	9	0	15	1.46619e+07	1.40634e+07	1.35743e+07	1.1842e+07	1.20977e+07	1.26085e+07	5.7554e+06	1.32174e+07	1.11286e+07	1.17238e+07	1.17221e+07	1.1581e+07	1.58915e+07	1.19096e+07	1.21654e+07	1.66243e+07	1.28792e+07	1.31466e+07	1.30377e+07	1.31259e+07	1.24944e+07	1.06571e+07	1.08206e+07	1.02414e+07	6.79652e+06	1.16338e+07	1.09786e+07	1.06897e+07	1.061e+07	1.08793e+07	1.35841e+07	1.31758e+07	1.32647e+07	1.27565e+07	1.19839e+07	1.13769e+07
285	159.608	159.567	159.709	526.066	525.564	526.416	103	34	9	34	9	2	15	1.29513e+06	1.24234e+06	1.19083e+06	1.2584e+06	1.40889e+06	1.40213e+06	645696	1.14024e+06	976450	1.18722e+06	1.17069e+06	1.22237e+06	1.22722e+06	1.0752e+06	1.17138e+06	1.22549e+06	1.27742e+06	1.2437e+06	1.2538e+06	1.29061e+06	1.32421e+06	1.24539e+06	1.16745e+06	1.10307e+06	591698	1.0961e+06	1.10623e+06	1.30519e+06	1.32119e+06	1.3359e+06	1.15934e+06	1.20432e+06	1.18852e+06	1.26721e+06	1.24531e+06	1.08564e+06
286	159.611	159.573	159.697	159.197	155.33	161.059	88	0	36	0	0	36	16	517189	486958	453786	546629	533629	522628	372061	467161	408253	518313	483964	486766	586998	443765	443577	636925	507631	494073	577653	461376	467097	564308	468032	430421	343682	464964	453131	530433	433150	429675	487031	517438	506791	566733	540306	521826
287	159.611	159.561	159.685	76.9181	70.3184	78.1791	64	1	27	1	0	34	1	519937	496595	502722	546157	635199	587170	285358	477676	415967	464369	501896	486390	1.83442e+06	1.8439e+06	1.93188e+06	534554	516770	557741	836190	765038	801312	714520	716652	675945	363291	696908	695500	649167	570896	604071	1.26815e+06	1.57869e+06	1.52351e+06	631384	683887	787605
288	160.11	160.099	160.128	433.62	426.913	435.716	169	36	36	36	9	36	16	1.92496e+07	1.86783e+07	1.86768e+07	1.88657e+07	1.94587e+07	2.08073e+07	6.25848e+06	1.71941e+07	1.53009e+07	1.8448e+07	1.83192e+07	1.86312e+07	1.71443e+07	1.70665e+07	1.79497e+07	1.85004e+07	1.87756e+07	1.93078e+07	1.73278e+07	1.74161e+07	1.73418e+07	1.67192e+07	1.69405e+07	1.70021e+07	8.90669e+06	1.57668e+07	1.60491e+07	1.81964e+07	1.84714e+07	1.85954e+07	1.68379e+07	1.70641e+07	1.71073e+07	1.78778e+07	1.73779e+07	1.75536e+07
289	160.043	160.043	160.043	116.01	110.068	117.704	168	36	36	35	9	36	16	9.17802e+07	7.84573e+07	6.97991e+07	9.62471e+07	8.73029e+07	8.27854e+07	8.05486e+07	1.42517e+08	1.04946e+08	9.52633e+07	8.56586e+07	8.15022e+07	1.837e+08	1.47694e+08	1.42377e+08	1.75382e+08	1.5482e+08	1.36922e+08	2.54924e+08	1.97179e+08	1.64524e+08	2.89375e+08	2.3277e+08	1.98628e+08	1.93048e+08	2.88329e+08	2.43971e+08	3.02485e+08	2.53258e+08	2.2136e+08	3.41013e+08	2.6929e+08	2.31914e+08	3.87795e+08	3.14041e+08	2.67089e+08
290	160.084	160.08	160.088	232.803	230.845	237.345	167	36	36	34	9	36	16	1.27894e+07	1.23322e+07	1.21914e+07	1.31812e+07	1.39954e+07	1.52322e+07	3.91072e+06	1.07895e+07	8.55019e+06	1.23658e+07	1.2607e+07	1.3225e+07	1.29376e+07	1.19097e+07	1.34198e+07	1.29856e+07	1.30621e+07	1.34483e+07	1.35826e+07	1.33581e+07	1.36942e+07	1.35259e+07	1.34e+07	1.32911e+07	5.80233e+06	1.3256e+07	1.31425e+07	1.38508e+07	1.41229e+07	1.47078e+07	1.20671e+07	1.31929e+07	1.35255e+07	1.2704e+07	1.39903e+07	1.37241e+07
291	160.043	160.042	160.085	364.358	359.653	376.392	162	36	36	34	4	36	16	2.82584e+07	2.84576e+07	2.90898e+07	2.8716e+07	3.06675e+07	3.40235e+07	1.49967e+07	2.65135e+07	2.33048e+07	2.67181e+07	2.83916e+07	2.95236e+07	3.26588e+07	2.29046e+07	2.97343e+07	3.66025e+07	3.07274e+07	3.32578e+07	2.97022e+07	2.9287e+07	2.909e+07	2.73454e+07	2.80858e+07	2.76146e+07	1.34267e+07	2.71881e+07	2.65658e+07	2.98434e+07	3.02615e+07	3.11924e+07	2.89088e+07	2.76236e+07	2.8815e+07	3.12656e+07	2.96235e+07	3.36146e+07
292	160.097	160.087	160.099	334.524	323.604	340.616	140	28	33	27	4	33	15	5.49913e+06	5.57981e+06	5.4246e+06	5.12281e+06	5.74943e+06	6.68682e+06	3.10298e+06	4.5355e+06	3.40209e+06	4.6069e+06	5.57723e+06	4.97858e+06	6.70784e+06	4.20557e+06	4.98442e+06	7.64722e+06	5.55503e+06	5.78525e+06	4.36706e+06	3.80896e+06	3.81385e+06	3.32471e+06	3.33856e+06	3.15873e+06	1.42285e+06	3.57706e+06	2.92248e+06	4.23456e+06	4.39493e+06	4.17372e+06	3.31524e+06	3.66496e+06	3.41406e+06	3.69194e+06	3.99225e+06	4.04221e+06
293	160.043	160.043	160.077	78.6758	75.8734	87.351	78	29	1	33	7	2	6	1.80062e+07	2.11724e+07	1.65638e+07	1.48313e+07	2.38785e+07	2.27177e+07	6.6504e+06	2.65537e+07	2.00091e+07	1.51454e+07	2.10236e+07	1.50175e+07	5.16173e+07	1.24036e+07	2.90579e+07	5.33574e+07	3.18268e+07	2.9327e+07	4.86943e+07	4.17529e+07	3.75991e+07	5.00071e+07	4.60384e+07	4.0493e+07	7.44594e+06	7.01574e+07	4.67208e+07	5.74893e+07	6.29253e+07	5.05519e+07	6.23152e+07	6.35979e+07	4.78705e+07	7.41793e+07	7.62429e+07	5.33875e+07
294	160.901	160.883	160.902	390.76	387.036	393.328	91	17	21	17	4	21	11	353578	557421	797361	434015	595329	767173	609159	533256	777691	388374	621671	824864	521915	576386	734046	475394	565581	722910	423292	637929	783130	459422	713090	864514	535543	656715	767724	486550	769282	808538	280421	612523	703249	278098	643261	709079
295	161.128	161.123	161.128	515.383	514.258	517.29	167	36	36	34	9	36	16	1.61712e+07	1.63462e+07	1.66246e+07	1.61467e+07	1.84564e+07	2.15993e+07	3.73143e+06	1.25343e+07	9.97176e+06	1.53289e+07	1.57606e+07	1.71278e+07	1.16096e+07	1.22565e+07	1.38129e+07	1.31384e+07	1.51051e+07	1.55663e+07	1.5776e+07	1.55991e+07	1.53876e+07	1.32797e+07	1.27999e+07	1.27434e+07	4.38651e+06	1.14193e+07	1.16424e+07	1.60772e+07	1.66859e+07	1.79e+07	1.18579e+07	1.34831e+07	1.33225e+07	1.38168e+07	1.46226e+07	1.56411e+07
296	161.091	161.069	161.105	445.093	441.757	448.324	167	36	36	34	9	36	16	9.61992e+06	9.71075e+06	9.86946e+06	9.71792e+06	9.48914e+06	9.86478e+06	9.12104e+06	8.74317e+06	8.65981e+06	9.26237e+06	9.37839e+06	9.24797e+06	1.03216e+07	8.62702e+06	8.94274e+06	1.08965e+07	8.92358e+06	9.00504e+06	9.23471e+06	9.2629e+06	9.23657e+06	9.24265e+06	9.2358e+06	9.3481e+06	8.45797e+06	8.7262e+06	8.76175e+06	9.42019e+06	9.27005e+06	9.57177e+06	9.36042e+06	8.91163e+06	8.87811e+06	9.01213e+06	8.72931e+06	8.75578e+06
297	161.045	161.025	161.048	114.773	99.6424	116.88	161	36	32	34	9	34	16	1.00806e+07	9.7849e+06	9.51088e+06	1.00071e+07	9.79526e+06	1.02723e+07	5.96916e+06	1.06371e+07	8.55031e+06	9.50237e+06	9.23899e+06	9.13479e+06	1.14699e+07	1.01944e+07	1.00866e+07	1.11969e+07	1.09721e+07	9.95242e+06	1.58193e+07	1.28583e+07	1.0136e+07	1.7754e+07	1.4714e+07	1.25151e+07	1.2618e+07	1.79226e+07	1.49974e+07	1.91411e+07	1.60036e+07	1.43837e+07	2.07858e+07	1.67727e+07	1.39144e+07	2.39765e+07	1.96171e+07	1.68899e+07
298	161.093	160.902	161.104	364.829	356.745	391.457	123	29	20	31	9	24	9	3.41918e+06	3.39638e+06	3.34614e+06	3.79641e+06	2.41407e+06	2.40573e+06	3.74818e+06	2.42151e+06	2.43943e+06	3.47902e+06	3.50504e+06	2.9309e+06	5.3931e+06	2.87181e+06	2.35105e+06	5.76083e+06	2.16569e+06	2.5632e+06	2.30801e+06	2.3293e+06	2.90439e+06	2.99368e+06	2.20095e+06	2.47222e+06	3.5251e+06	2.47936e+06	2.19417e+06	2.8318e+06	2.53993e+06	2.44122e+06	3.34847e+06	2.22633e+06	2.2714e+06	3.43263e+06	2.77464e+06	2.15005e+06
299	161.072	161.071	161.074	210.568	209.376	213.274	114	26	18	28	0	26	16	5.4958e+06	4.79336e+06	4.71892e+06	1.12407e+07	9.84181e+06	9.47871e+06	8.44913e+06	6.43382e+06	6.32362e+06	8.5246e+06	7.62442e+06	7.41789e+06	9.78981e+06	7.34041e+06	7.62593e+06	1.02016e+07	8.27438e+06	7.76377e+06	3.14153e+06	3.11831e+06	3.02711e+06	8.60011e+06	8.16495e+06	7.32952e+06	7.76419e+06	6.711e+06	6.51083e+06	7.06564e+06	6.13039e+06	6.55356e+06	4.49126e+06	4.29942e+06	4.00097e+06	8.4213e+06	7.53514e+06	6.93126e+06
300	161.09	161.088	161.092	155.204	154.054	162.342	81	33	1	30	9	0	8	2.97705e+06	3.88971e+06	4.47294e+06	3.22258e+06	4.45463e+06	5.73632e+06	1.54303e+06	3.02844e+06	3.0936e+06	2.82215e+06	3.74438e+06	4.76069e+06	2.44903e+06	2.99125e+06	4.12095e+06	2.8669e+06	3.59857e+06	4.67669e+06	3.44757e+06	4.10285e+06	4.8216e+06	3.09408e+06	3.92343e+06	4.4208e+06	1.62901e+06	3.27923e+06	4.12756e+06	3.34474e+06	4.29634e+06	5.10044e+06	2.73925e+06	3.86117e+06	4.52586e+06	3.15023e+06	4.10458e+06	4.8931e+06
301	161.13	161.126	161.134	68.6277	66.2573	70.0645	44	0	17	0	0	19	8	1.00646e+06	1.0528e+06	1.03248e+06	950312	985418	994000	1.06543e+06	880675	919369	1.0317e+06	1.11403e+06	1.02632e+06	770068	793841	764448	1.06593e+06	964245	985770	948759	829887	890462	953457	898559	924801	990293	990241	1.00714e+06	1.00215e+06	839035	1.03714e+06	764259	778414	705141	967404	935407	910468
302	162.112	162.111	162.112	422.941	421.938	427.374	169	36	36	36	9	36	16	1.96684e+08	1.95392e+08	1.97245e+08	1.92562e+08	2.07012e+08	2.26979e+08	5.00722e+07	1.46862e+08	1.24908e+08	1.72171e+08	1.78384e+08	1.83011e+08	1.44916e+08	1.41538e+08	1.58175e+08	1.6037e+08	1.74477e+08	1.78406e+08	2.80475e+08	2.79028e+08	2.84326e+08	2.56919e+08	2.60538e+08	2.62884e+08	1.22388e+08	2.36899e+08	2.39328e+08	2.82876e+08	2.87889e+08	2.9947e+08	2.57256e+08	2.54764e+08	2.59201e+08	2.74655e+08	2.69156e+08	2.74272e+08
303	162.075	162.073	162.078	372.493	371.627	374.716	154	34	34	30	9	31	16	1.25143e+07	2.22878e+07	2.73674e+07	1.30346e+07	2.40281e+07	3.7412e+07	6.00619e+06	1.73923e+07	1.90422e+07	1.00288e+07	1.67471e+07	2.4212e+07	1.34027e+07	1.73602e+07	2.78472e+07	1.63017e+07	2.58783e+07	3.42394e+07	2.24419e+07	3.22886e+07	4.24221e+07	2.21899e+07	3.24546e+07	4.27566e+07	6.58422e+06	2.76685e+07	2.91809e+07	2.08707e+07	3.15455e+07	3.98477e+07	1.79368e+07	2.97612e+07	3.81245e+07	1.64737e+07	2.88891e+07	3.69939e+07
304	162.038	162.037	162.055	115.911	110.068	157.286	135	36	17	34	9	22	16	3.63794e+06	3.12024e+06	2.73583e+06	3.84556e+06	3.35353e+06	3.21034e+06	3.1258e+06	5.82913e+06	4.1675e+06	3.75623e+06	3.34139e+06	3.18405e+06	7.34547e+06	5.89466e+06	5.57861e+06	6.91911e+06	6.25133e+06	5.43643e+06	1.01865e+07	7.78671e+06	6.53204e+06	1.17234e+07	9.64295e+06	8.08217e+06	8.51688e+06	1.18193e+07	9.96482e+06	1.24157e+07	1.05889e+07	8.56778e+06	1.36486e+07	1.06856e+07	9.25053e+06	1.59959e+07	1.28246e+07	1.09841e+07
305	163.117	163.115	163.12	423.006	421.938	424.044	166	35	36	34	9	36	16	1.48784e+07	1.51516e+07	1.50618e+07	1.45094e+07	1.58825e+07	1.70332e+07	5.30876e+06	1.16504e+07	1.02998e+07	1.32528e+07	1.36808e+07	1.42155e+07	1.11209e+07	1.1374e+07	1.27219e+07	1.23898e+07	1.33918e+07	1.42469e+07	2.13448e+07	2.112e+07	2.14821e+07	1.95484e+07	1.98152e+07	2.04936e+07	1.02721e+07	1.84381e+07	1.85157e+07	2.11883e+07	2.19222e+07	2.27344e+07	1.99566e+07	1.95032e+07	2.01309e+07	2.09583e+07	2.05319e+07	2.08001e+07
306	164.03	164.029	164.031	431.159	429.007	435.28	169	36	36	36	9	36	16	2.27315e+08	2.20996e+08	2.14046e+08	2.25889e+08	2.40243e+08	2.54485e+08	4.19325e+07	1.89912e+08	1.55636e+08	2.13656e+08	2.14356e+08	2.17227e+08	1.7112e+08	1.85773e+08	2.04269e+08	1.8229e+08	2.15289e+08	2.17615e+08	2.54642e+08	2.48878e+08	2.40689e+08	2.34408e+08	2.27815e+08	2.23204e+08	8.73304e+07	2.13241e+08	2.06395e+08	2.54866e+08	2.60526e+08	2.60223e+08	2.28683e+08	2.28479e+08	2.28438e+08	2.36238e+08	2.38354e+08	2.36293e+08
307	164.127	164.098	164.128	367.815	364.531	369.892	166	35	36	34	9	36	16	3.79866e+06	4.36607e+06	4.68517e+06	2.41898e+07	3.22074e+07	3.71055e+07	3.80189e+06	5.77149e+06	5.85959e+06	5.95199e+06	7.34842e+06	8.39041e+06	1.11655e+07	1.47387e+07	1.93334e+07	1.12528e+07	1.50762e+07	1.66611e+07	2.9705e+07	3.19619e+07	3.29291e+07	2.07026e+07	2.30965e+07	2.36032e+07	3.32871e+06	5.96596e+06	5.75302e+06	3.74768e+07	4.18589e+07	4.495e+07	1.89158e+07	2.20828e+07	2.39068e+07	1.15045e+07	1.52182e+07	1.63953e+07
308	164.083	164.082	164.086	107.334	103.196	108.422	142	34	29	32	6	28	13	5.40754e+06	5.07e+06	5.15444e+06	5.27702e+06	5.65649e+06	5.42023e+06	4.29221e+06	4.60811e+06	4.20588e+06	4.93851e+06	4.89732e+06	5.0849e+06	6.17256e+06	4.78651e+06	4.97295e+06	6.33391e+06	4.91272e+06	4.97464e+06	5.68583e+06	5.53841e+06	5.14219e+06	5.39588e+06	5.16706e+06	5.2935e+06	3.79652e+06	4.71462e+06	4.57781e+06	5.67394e+06	5.80458e+06	5.70006e+06	5.24267e+06	5.18167e+06	4.99348e+06	4.98265e+06	4.95152e+06	5.01054e+06
309	164.075	164.074	164.079	536.049	534.141	538.64	67	14	19	18	0	16	0	3.88734e+06	3.67349e+06	3.62944e+06	3.77595e+06	4.27075e+06	4.91522e+06	1.47614e+06	3.13433e+06	2.31839e+06	3.84212e+06	3.76082e+06	3.97047e+06	2.92767e+06	3.1094e+06	3.42991e+06	3.29088e+06	3.67006e+06	3.52443e+06	2.96534e+06	2.60678e+06	2.57323e+06	2.23125e+06	2.21626e+06	2.05712e+06	788421	1.95058e+06	1.85337e+06	2.78753e+06	2.93901e+06	2.94553e+06	2.01803e+06	2.23685e+06	2.37974e+06	2.46824e+06	2.55192e+06	2.52525e+06
310	164.926	164.921	164.93	502.06	472.449	506.111	146	36	27	29	9	31	13	2.11476e+07	2.41997e+07	2.29924e+07	1.97955e+07	2.29358e+07	2.27642e+07	1.00243e+07	2.57096e+07	2.68861e+07	2.17997e+07	2.44388e+07	2.35296e+07	1.02034e+07	2.46875e+07	2.53168e+07	1.09633e+07	2.34784e+07	2.45367e+07	2.15653e+07	2.35313e+07	2.21643e+07	2.20582e+07	2.20407e+07	2.25359e+07	1.22561e+07	2.45159e+07	2.44089e+07	2.12636e+07	2.25685e+07	2.17265e+07	1.24698e+07	2.31517e+07	2.31705e+07	1.26089e+07	2.37041e+07	2.38171e+07
311	165.051	165.051	165.051	633.329	630.138	651.188	168	36	36	35	9	36	16	8.87263e+08	8.63713e+08	8.55245e+08	9.23604e+08	9.64429e+08	1.05169e+09	4.04907e+08	6.17666e+08	5.17399e+08	9.28423e+08	9.20855e+08	9.4525e+08	9.34694e+08	7.20868e+08	7.9467e+08	9.80195e+08	8.26126e+08	8.34787e+08	1.08285e+09	1.05055e+09	1.06106e+09	9.78186e+08	9.75029e+08	9.63311e+08	5.01528e+08	8.98809e+08	8.91552e+08	1.15531e+09	1.17664e+09	1.22124e+09	1.01812e+09	9.79471e+08	9.92893e+08	1.11512e+09	1.07962e+09	1.08675e+09
312	164.983	164.966	165.031	427.566	426.241	433.646	166	36	36	34	9	36	15	1.38001e+07	1.55422e+07	1.55954e+07	1.40264e+07	1.63707e+07	1.71204e+07	1.95969e+06	1.56113e+07	1.48462e+07	1.38414e+07	1.58709e+07	1.62304e+07	7.16211e+06	1.52635e+07	1.59698e+07	7.36886e+06	1.60155e+07	1.65194e+07	1.66538e+07	1.74227e+07	1.6872e+07	1.57489e+07	1.68019e+07	1.62062e+07	4.45353e+06	1.63287e+07	1.59691e+07	1.70051e+07	1.73535e+07	1.78363e+07	1.01546e+07	1.62088e+07	1.68709e+07	1.04824e+07	1.68393e+07	1.70257e+07
313	165.055	165.054	165.076	385.27	381.125	387.057	26	2	15	1	5	2	1	4.63812e+07	4.32921e+07	4.41871e+07	4.73116e+07	5.09266e+07	5.72587e+07	1.4745e+07	3.90729e+07	3.47067e+07	4.19047e+07	4.20538e+07	4.30827e+07	3.96474e+07	3.91841e+07	4.59665e+07	4.50134e+07	4.72032e+07	4.82352e+07	5.02229e+07	4.93219e+07	5.08807e+07	4.37365e+07	4.38791e+07	4.80856e+07	1.6169e+07	4.31091e+07	4.73171e+07	5.22432e+07	5.30311e+07	5.28068e+07	4.29777e+07	4.73314e+07	5.02955e+07	4.89217e+07	4.94119e+07	5.03151e+07
314	166.016	166.013	166.021	632.255	630.138	636.121	162	35	34	34	9	34	16	4.0895e+06	3.78759e+06	3.86841e+06	4.17901e+06	4.03948e+06	4.3409e+06	3.88841e+06	3.29778e+06	2.81854e+06	4.02106e+06	3.87442e+06	4.04719e+06	6.35198e+06	3.58066e+06	3.70373e+06	6.54849e+06	3.97391e+06	3.89032e+06	4.2733e+06	4.32121e+06	4.12318e+06	4.3532e+06	3.92513e+06	4.04342e+06	3.69108e+06	4.11352e+06	3.91658e+06	4.48474e+06	4.46739e+06	4.52123e+06	5.10478e+06	4.19166e+06	3.94969e+06	5.08725e+06	4.24598e+06	4.26692e+06
315	166.086	166.086	166.087	342.06	341.471	349.236	168	36	36	35	9	36	16	4.03444e+09	3.93258e+09	3.82506e+09	4.04049e+09	4.30917e+09	4.67989e+09	1.22064e+09	3.4004e+09	2.71941e+09	3.69963e+09	3.724e+09	3.75875e+09	3.70051e+09	3.31036e+09	3.66664e+09	4.31041e+09	4.23767e+09	4.21245e+09	4.26372e+09	4.05635e+09	4.03139e+09	4.03877e+09	3.95359e+09	3.85527e+09	1.69644e+09	3.71239e+09	3.36869e+09	4.34594e+09	4.38875e+09	4.46605e+09	3.86823e+09	3.92979e+09	3.77951e+09	4.10998e+09	4.15978e+09	4.06458e+09
316	166.05	166.049	166.05	180.166	171.261	184.162	163	36	34	34	9	34	16	1.72395e+07	1.78724e+07	1.76957e+07	1.79065e+07	1.8098e+07	1.87709e+07	1.19743e+07	1.6368e+07	1.46489e+07	1.68968e+07	1.73057e+07	1.77342e+07	2.26922e+07	1.66394e+07	1.80587e+07	2.35656e+07	1.8373e+07	1.85547e+07	1.90826e+07	1.90155e+07	1.89015e+07	1.81219e+07	1.81724e+07	1.79329e+07	1.11809e+07	1.80617e+07	1.79557e+07	1.7961e+07	1.85816e+07	1.83603e+07	1.80302e+07	1.81347e+07	1.82045e+07	1.81718e+07	1.90374e+07	1.90032e+07
317	166.034	166.019	166.039	428.268	426.48	429.714	54	2	19	3	0	23	7	1.6445e+06	1.57244e+06	1.57637e+06	1.58234e+06	1.75156e+06	1.90079e+06	459171	1.36115e+06	1.2218e+06	1.50272e+06	1.32462e+06	1.51203e+06	1.17488e+06	1.2147e+06	1.52943e+06	1.30293e+06	1.51871e+06	1.67156e+06	2.07807e+06	2.18542e+06	2.23359e+06	1.98701e+06	2.04479e+06	1.90125e+06	689552	1.78961e+06	1.78436e+06	2.18118e+06	2.80739e+06	2.21024e+06	1.88932e+06	1.99927e+06	1.89912e+06	1.96998e+06	2.08112e+06	2.17226e+06
318	166.962	166.957	166.971	385.132	384.201	385.973	152	34	32	34	0	36	16	1.28597e+07	1.41887e+07	1.47211e+07	1.26399e+07	1.51119e+07	1.74565e+07	2.83147e+06	9.03351e+06	7.42966e+06	1.33508e+07	1.49109e+07	1.67751e+07	9.82977e+06	8.93525e+06	1.08761e+07	1.16787e+07	1.04568e+07	1.13473e+07	1.09005e+07	1.09188e+07	1.15909e+07	9.43022e+06	9.84106e+06	9.93986e+06	3.39678e+06	8.45287e+06	8.16364e+06	1.19125e+07	1.29955e+07	1.42083e+07	8.22514e+06	9.22294e+06	9.03196e+06	9.87531e+06	1.04356e+07	1.11832e+07
319	166.916	166.915	166.917	503.377	501.791	505.473	121	31	22	29	8	20	11	307529	342031	348556	306189	342399	265850	280505	295748	337960	341242	378447	341031	259184	344893	349358	300119	323658	310000	249492	278283	347637	291402	283678	315724	366608	338678	418331	293664	343416	337304	335468	297734	341986	302240	315729	317874
320	167.048	167.048	167.048	633.294	630.138	650.918	169	36	36	36	9	36	16	1.20723e+08	1.17607e+08	1.16638e+08	1.25355e+08	1.3147e+08	1.4435e+08	5.39786e+07	8.17786e+07	6.87441e+07	1.25891e+08	1.25343e+08	1.28269e+08	1.27673e+08	9.74327e+07	1.0748e+08	1.3245e+08	1.12244e+08	1.13065e+08	1.48419e+08	1.43191e+08	1.4525e+08	1.33922e+08	1.32308e+08	1.31478e+08	6.67432e+07	1.22523e+08	1.2067e+08	1.58528e+08	1.61084e+08	1.6643e+08	1.38909e+08	1.33738e+08	1.36531e+08	1.52584e+08	1.47104e+08	1.49157e+08
321	167.093	167.093	167.093	167.989	166.98	169.739	167	36	36	34	9	36	16	3.91316e+08	3.99347e+08	4.10472e+08	4.66928e+08	5.80591e+08	7.07709e+08	1.25237e+08	3.36798e+08	2.75337e+08	3.66945e+08	3.93132e+08	4.33537e+08	3.92903e+08	3.25085e+08	3.77782e+08	4.37917e+08	4.16012e+08	4.34282e+08	5.8072e+08	5.99268e+08	6.2778e+08	4.86036e+08	5.19792e+08	5.37776e+08	1.87592e+08	4.36039e+08	4.5559e+08	5.46228e+08	6.09424e+08	6.72393e+08	5.05413e+08	5.54499e+08	5.90889e+08	4.76436e+08	5.01358e+08	5.32413e+08
322	167.09	167.089	167.09	341.99	341.471	348.955	167	36	36	34	9	36	16	3.95023e+08	3.84472e+08	3.76776e+08	3.9522e+08	4.24084e+08	4.64042e+08	1.18349e+08	3.33789e+08	2.68179e+08	3.61913e+08	3.62414e+08	3.70156e+08	3.62433e+08	3.2257e+08	3.60406e+08	4.20836e+08	4.16295e+08	4.12852e+08	4.18934e+08	4.02264e+08	3.98891e+08	3.97259e+08	3.88635e+08	3.78824e+08	1.66778e+08	3.64129e+08	3.31366e+08	4.23265e+08	4.32741e+08	4.41201e+08	3.78154e+08	3.87712e+08	3.68095e+08	4.0269e+08	4.09069e+08	3.99521e+08
323	168.093	168.09	168.096	341.491	340.952	348.672	167	36	36	34	9	36	16	1.33476e+07	1.29502e+07	1.28668e+07	1.34928e+07	1.4294e+07	1.51838e+07	4.53907e+06	1.15748e+07	9.09866e+06	1.23131e+07	1.21613e+07	1.25978e+07	1.22878e+07	1.11005e+07	1.1865e+07	1.41309e+07	1.37487e+07	1.35705e+07	1.4128e+07	1.31098e+07	1.33615e+07	1.29709e+07	1.30065e+07	1.29137e+07	5.88749e+06	1.23616e+07	1.13566e+07	1.44428e+07	1.42798e+07	1.49804e+07	1.25163e+07	1.31392e+07	1.25552e+07	1.32665e+07	1.36766e+07	1.37103e+07
324	168.093	168.082	168.096	168.706	167.783	172.473	167	36	36	34	9	36	16	3.11246e+07	3.10002e+07	3.17901e+07	3.58583e+07	4.35085e+07	5.25958e+07	1.08823e+07	2.49836e+07	2.09396e+07	2.93049e+07	3.16572e+07	3.43578e+07	2.95334e+07	2.3909e+07	2.80649e+07	3.30168e+07	3.1077e+07	3.25113e+07	4.17494e+07	4.36217e+07	4.59518e+07	3.50883e+07	3.80543e+07	3.90423e+07	1.42779e+07	3.17002e+07	3.30454e+07	4.0239e+07	4.46606e+07	4.90533e+07	3.67334e+07	4.05086e+07	4.26917e+07	3.50198e+07	3.66606e+07	3.85428e+07
325	168.046	168.002	168.049	370.351	369.446	373.436	156	33	36	29	9	34	15	2.02215e+06	1.72749e+06	1.70863e+06	1.89877e+06	1.80687e+06	2.78211e+06	542338	1.33496e+06	851141	1.63382e+06	1.38373e+06	1.89293e+06	2.07913e+06	1.35669e+06	1.7012e+06	2.92793e+06	2.23796e+06	2.25732e+06	2.05693e+06	1.72839e+06	2.74581e+06	2.1761e+06	1.77181e+06	2.24508e+06	294931	1.7819e+06	1.78166e+06	2.42464e+06	2.24018e+06	3.39792e+06	2.36811e+06	1.76333e+06	1.87252e+06	2.3726e+06	1.76634e+06	2.09146e+06
326	168.067	168.046	168.069	267.619	244.358	268.594	20	5	1	7	5	1	1	3.56072e+06	3.50543e+06	3.45854e+06	3.54242e+06	3.43736e+06	3.42559e+06	2.36723e+06	6.3247e+06	7.99715e+06	3.72684e+06	3.56776e+06	3.5387e+06	3.07063e+06	7.19333e+06	4.86632e+06	3.30994e+06	3.24179e+06	3.21505e+06	3.25892e+06	3.19879e+06	3.18243e+06	4.35817e+06	4.74037e+06	4.7891e+06	9.7861e+06	7.57469e+06	7.7594e+06	3.32759e+06	3.33129e+06	3.40567e+06	5.08133e+06	5.09822e+06	4.60276e+06	3.34071e+06	3.25829e+06	3.28695e+06
327	168.077	168.065	168.098	117.047	105.74	120.976	167	36	36	34	9	36	16	8.63825e+07	7.64254e+07	6.92021e+07	8.07639e+07	7.65193e+07	7.44605e+07	3.69064e+07	6.71215e+07	5.53377e+07	9.90338e+07	9.06893e+07	8.5294e+07	8.64646e+07	5.90812e+07	5.96625e+07	9.35883e+07	6.63832e+07	6.34115e+07	6.16928e+07	5.81314e+07	5.39743e+07	6.01216e+07	5.52092e+07	5.19881e+07	4.2581e+07	5.80589e+07	5.34385e+07	7.45949e+07	6.96522e+07	6.88083e+07	7.3261e+07	6.02256e+07	5.91484e+07	7.73178e+07	6.34973e+07	5.96699e+07
328	168.949	168.948	168.959	385.314	384.246	386.246	165	35	36	34	8	36	16	1.37039e+06	1.53305e+06	1.75771e+06	1.43263e+06	1.84109e+06	2.05218e+06	143745	1.00579e+06	804090	1.60591e+06	1.69205e+06	2.03922e+06	972955	1.04195e+06	1.32112e+06	1.19507e+06	1.25665e+06	1.33266e+06	1.30998e+06	1.26014e+06	1.35667e+06	1.08141e+06	1.18358e+06	1.1477e+06	227202	859710	880027	1.41836e+06	1.49498e+06	1.79303e+06	858314	976736	1.14846e+06	1.1339e+06	1.14932e+06	1.29089e+06
329	169.058	169.058	169.058	444.165	441.757	446.695	167	36	36	34	9	36	16	6.16601e+08	6.03323e+08	5.91167e+08	6.50999e+08	7.10446e+08	7.73568e+08	5.52115e+07	4.92381e+08	3.47865e+08	5.64569e+08	5.75406e+08	5.85512e+08	4.96217e+08	4.89369e+08	5.53778e+08	5.66515e+08	6.43017e+08	6.2846e+08	6.8733e+08	6.56665e+08	6.37978e+08	6.10441e+08	5.98036e+08	5.77485e+08	1.1689e+08	5.32899e+08	5.16515e+08	6.53943e+08	6.62604e+08	6.61523e+08	6.00285e+08	6.19395e+08	6.15196e+08	6.56739e+08	6.64851e+08	6.59908e+08
330	169.059	169.058	169.059	328.308	316.514	331.754	85	17	11	25	0	18	14	7.94777e+07	7.22069e+07	6.59518e+07	7.70963e+07	7.66902e+07	8.28802e+07	7.10325e+06	4.5859e+07	3.32537e+07	6.38635e+07	6.08037e+07	5.86258e+07	1.61905e+07	5.84278e+07	6.22522e+07	1.86644e+07	6.94006e+07	6.68068e+07	1.5942e+07	1.45575e+07	1.42058e+07	1.64726e+07	1.55103e+07	1.42609e+07	9.24661e+06	2.04025e+07	1.70694e+07	2.76595e+07	2.71603e+07	2.70222e+07	1.60334e+07	1.43965e+07	1.34613e+07	2.99018e+07	2.93139e+07	2.89777e+07
331	169.094	169.092	169.095	526.631	526.036	527.104	71	25	27	6	0	12	1	2.28202e+07	2.33218e+07	2.2764e+07	2.3272e+07	2.52443e+07	2.69551e+07	3.64252e+06	1.87237e+07	1.54756e+07	2.13759e+07	2.2624e+07	2.25381e+07	1.43112e+07	1.84784e+07	1.94361e+07	1.57541e+07	2.15736e+07	2.15924e+07	2.40547e+07	2.39453e+07	2.28077e+07	2.23054e+07	2.06723e+07	2.08865e+07	8.01171e+06	1.98721e+07	1.90418e+07	2.47651e+07	2.46342e+07	2.45962e+07	2.25619e+07	2.1183e+07	2.08532e+07	2.42879e+07	2.36726e+07	2.14782e+07
332	169.994	169.988	170.007	373.387	369.646	375.358	166	36	36	33	9	36	16	1.03463e+07	1.05284e+07	1.14007e+07	1.06726e+07	9.87815e+06	8.88018e+06	3.03348e+06	1.07823e+07	9.63501e+06	1.18238e+07	1.12553e+07	1.23956e+07	3.09279e+06	1.03343e+07	1.08561e+07	2.55997e+06	9.47305e+06	8.91469e+06	9.69184e+06	9.47069e+06	9.70063e+06	8.70566e+06	9.27882e+06	8.34119e+06	7.89959e+06	9.12464e+06	7.59202e+06	9.16006e+06	8.95149e+06	9.26073e+06	9.12762e+06	9.651e+06	9.22928e+06	1.00401e+07	8.49621e+06	9.60894e+06
333	170.081	170.081	170.081	139.411	136.387	142.636	169	36	36	36	9	36	16	3.10675e+09	3.02915e+09	2.97716e+09	3.40292e+09	3.64787e+09	3.94305e+09	1.21892e+09	3.33062e+09	2.67113e+09	3.18213e+09	3.22054e+09	3.27033e+09	3.94613e+09	3.31035e+09	3.69967e+09	4.20056e+09	3.95015e+09	3.94633e+09	4.26046e+09	4.07842e+09	4.08074e+09	3.84451e+09	3.78796e+09	3.72018e+09	1.62391e+09	3.65551e+09	3.66505e+09	4.41338e+09	4.52298e+09	4.5538e+09	3.93792e+09	3.931e+09	3.905e+09	4.11182e+09	4.14479e+09	4.11582e+09
334	170.027	170.024	170.027	431.894	430.021	435.014	167	36	36	34	9	36	16	3.20128e+07	3.12107e+07	2.96228e+07	3.20433e+07	3.14599e+07	3.05368e+07	1.68124e+07	2.84978e+07	2.54266e+07	3.1117e+07	2.95462e+07	2.9669e+07	2.90058e+07	2.66139e+07	2.66625e+07	3.03223e+07	2.84348e+07	2.87743e+07	2.7958e+07	2.71454e+07	2.5453e+07	2.72659e+07	2.69119e+07	2.58424e+07	2.13415e+07	2.55679e+07	2.41457e+07	2.94391e+07	2.80939e+07	2.71601e+07	2.68101e+07	2.5769e+07	2.4944e+07	2.70709e+07	2.68558e+07	2.56944e+07
335	170.154	170.154	170.162	70.6876	68.0381	75.9739	43	24	0	11	8	0	0	242209	203169	245508	404389	495835	506667	168499	330751	287694	353384	296118	285797	190891	127732	134836	315921	319955	360743	752035	715447	647652	424426	444747	366026	207859	269062	253812	313900	283368	320068	105918	87179	106926	458817	394119	405590
336	171.085	171.085	171.087	139.278	136.331	142.636	167	36	36	34	9	36	16	2.64457e+08	2.59977e+08	2.54397e+08	2.91649e+08	3.12265e+08	3.37732e+08	1.02209e+08	2.86184e+08	2.30102e+08	2.72089e+08	2.75008e+08	2.79606e+08	3.38367e+08	2.84431e+08	3.17572e+08	3.58875e+08	3.39156e+08	3.39264e+08	3.6436e+08	3.50055e+08	3.49514e+08	3.30536e+08	3.24342e+08	3.18854e+08	1.38681e+08	3.14044e+08	3.15879e+08	3.79599e+08	3.88034e+08	3.91406e+08	3.37714e+08	3.38509e+08	3.3527e+08	3.52559e+08	3.55355e+08	3.52798e+08
337	171.026	171.023	171.098	431.907	429.926	444.631	157	31	32	34	9	35	16	1.6117e+06	1.76424e+06	1.72394e+06	1.70149e+06	1.73957e+06	1.70663e+06	757799	1.4538e+06	1.40895e+06	1.74456e+06	1.59681e+06	1.651e+06	1.40456e+06	1.43578e+06	1.49441e+06	1.54354e+06	1.56392e+06	1.76502e+06	1.45291e+06	1.57072e+06	1.40997e+06	1.53543e+06	1.57384e+06	1.4716e+06	954066	1.37081e+06	1.29284e+06	1.55435e+06	1.57722e+06	1.66173e+06	1.46256e+06	1.36274e+06	1.40977e+06	1.3625e+06	1.43233e+06	1.53719e+06
338	171.552	171.552	171.553	371.984	370.266	374.536	106	28	23	13	8	23	11	5.80439e+06	6.13003e+06	7.14851e+06	6.3304e+06	6.06036e+06	6.21935e+06	1.08383e+07	9.24725e+06	9.9316e+06	4.31713e+06	4.89854e+06	5.09675e+06	2.29367e+07	8.17199e+06	1.05501e+07	2.0605e+07	8.62381e+06	9.47353e+06	1.04853e+07	1.17967e+07	1.27656e+07	1.15479e+07	1.21584e+07	1.39645e+07	9.2295e+06	1.27343e+07	1.54843e+07	8.02918e+06	7.96694e+06	8.19372e+06	1.2415e+07	1.19947e+07	1.39442e+07	9.88998e+06	8.99931e+06	1.10237e+07
339	172.133	172.035	172.133	166.421	135.879	194.65	170	36	36	36	9	36	16	1.31999e+08	1.27998e+08	1.24991e+08	1.36483e+08	1.4509e+08	1.59177e+08	4.4765e+07	1.08662e+08	8.58163e+07	1.31858e+08	1.31984e+08	1.34353e+08	1.53637e+08	1.2044e+08	1.34714e+08	1.52847e+08	1.37502e+08	1.36799e+08	1.3631e+08	1.31373e+08	1.31826e+08	1.29996e+08	1.29142e+08	1.26388e+08	5.93049e+07	1.30217e+08	1.27749e+08	1.34829e+08	1.37324e+08	1.44052e+08	1.30315e+08	1.30716e+08	1.3271e+08	1.3495e+08	1.32365e+08	1.33753e+08
340	172.034	172.034	172.035	545.316	541.246	550.273	149	31	35	29	8	33	13	6.42145e+06	5.95316e+06	8.18339e+06	6.52529e+06	6.07568e+06	5.45757e+06	1.85893e+06	4.79185e+06	6.43832e+06	6.40361e+06	5.67689e+06	7.72375e+06	3.1301e+06	4.85111e+06	7.35447e+06	4.04656e+06	5.30939e+06	5.078e+06	5.82234e+06	5.21777e+06	7.95726e+06	7.29154e+06	4.60538e+06	7.88127e+06	3.38103e+06	6.68794e+06	6.79513e+06	6.05587e+06	5.51216e+06	5.12024e+06	5.11474e+06	6.61211e+06	4.63768e+06	6.1907e+06	5.11029e+06	4.76066e+06
341	172.981	172.98	172.983	406.728	406.469	416.078	169	36	36	36	9	36	16	1.41724e+08	1.40556e+08	1.34259e+08	1.39879e+08	1.41928e+08	1.42165e+08	1.06411e+08	1.35189e+08	1.26911e+08	1.41545e+08	1.38445e+08	1.40272e+08	1.57237e+08	1.35166e+08	1.36018e+08	1.60303e+08	1.41481e+08	1.42846e+08	1.45956e+08	1.42358e+08	1.4201e+08	1.40462e+08	1.37172e+08	1.37925e+08	1.08852e+08	1.35664e+08	1.34506e+08	1.46152e+08	1.40011e+08	1.44438e+08	1.43053e+08	1.39914e+08	1.39693e+08	1.45442e+08	1.3953e+08	1.41021e+08
342	173.077	173.075	173.078	104.501	102.103	105.219	167	36	36	34	9	36	16	5.42868e+07	5.38419e+07	5.39148e+07	5.67366e+07	6.08981e+07	6.42454e+07	3.37919e+07	7.10506e+07	6.28449e+07	6.71925e+07	7.11368e+07	7.38136e+07	6.88545e+07	7.02262e+07	7.4908e+07	4.83745e+07	5.01369e+07	5.26979e+07	5.24008e+07	5.55724e+07	5.32616e+07	4.60298e+07	4.60777e+07	4.61184e+07	4.06418e+07	6.90315e+07	6.29154e+07	7.0637e+07	7.15367e+07	7.51627e+07	6.6445e+07	6.79337e+07	6.76502e+07	6.50056e+07	6.64604e+07	6.53273e+07
343	173.127	172.956	173.128	347.776	346.997	370.154	167	36	36	34	9	36	16	2.281e+07	2.18938e+07	2.20934e+07	2.35912e+07	2.3665e+07	2.54828e+07	1.24597e+07	2.06994e+07	1.7672e+07	2.24976e+07	2.21225e+07	2.2992e+07	2.4637e+07	2.09822e+07	2.24579e+07	2.46328e+07	2.36972e+07	2.33873e+07	2.54673e+07	2.44639e+07	2.43226e+07	2.43976e+07	2.32423e+07	2.38608e+07	1.24432e+07	2.14571e+07	6.90297e+07	2.53494e+07	2.59711e+07	2.57342e+07	2.1639e+07	2.17862e+07	2.28609e+07	2.2633e+07	2.28926e+07	2.32232e+07
344	173.114	173.099	173.125	165.738	163.542	178.645	83	33	2	33	3	6	6	1.72295e+07	1.65594e+07	1.61962e+07	1.58583e+07	1.7129e+07	1.83627e+07	5.44127e+06	1.48163e+07	1.25e+07	1.51408e+07	1.51015e+07	1.53497e+07	2.4444e+07	1.56934e+07	1.65143e+07	2.50138e+07	1.80244e+07	1.75123e+07	1.85632e+07	1.84768e+07	1.87497e+07	1.75665e+07	1.69293e+07	1.65803e+07	9.17368e+06	1.6625e+07	1.6583e+07	1.69162e+07	1.71599e+07	1.80081e+07	1.78429e+07	1.79039e+07	1.82911e+07	1.81665e+07	1.72956e+07	1.75504e+07
345	173.168	173.165	173.244	71.6731	71.101	78.8958	30	15	1	8	6	0	0	202589	229465	250298	263936	336306	372188	169760	408808	371602	462939	460027	515456	31819.5	75322.1	59717.1	324671	308962	357784	230198	208403	179823	265256	233047	290952	205740	366849	407564	434218	478382	475604	79939.3	115069	81384.2	221022	219380	217467
346	174.087	173.985	174.09	501.594	489.453	549.195	169	36	36	34	9	36	16	1.97649e+07	1.84381e+07	1.82334e+07	1.98978e+07	1.95975e+07	2.10575e+07	7.45314e+06	1.14562e+07	1.01412e+07	1.88933e+07	1.77689e+07	1.79332e+07	1.75331e+07	1.12613e+07	1.22938e+07	1.6959e+07	1.27078e+07	1.29775e+07	1.47472e+07	1.43306e+07	1.45688e+07	1.35966e+07	1.97704e+07	1.29404e+07	7.18349e+06	1.14015e+07	1.13511e+07	1.64275e+07	1.65422e+07	1.69829e+07	1.39464e+07	1.22847e+07	1.23214e+07	1.48834e+07	1.28883e+07	1.30452e+07
347	174.082	174.072	174.09	103.112	100.736	104.799	163	36	34	34	8	35	16	5.69427e+06	5.7041e+06	5.59863e+06	5.39577e+06	5.62628e+06	5.53746e+06	3.86599e+06	6.67544e+06	5.85195e+06	5.8201e+06	5.84608e+06	5.9147e+06	6.85127e+06	6.3241e+06	6.50099e+06	6.32952e+06	5.89367e+06	5.92263e+06	6.28168e+06	6.24414e+06	6.21093e+06	5.35687e+06	5.29128e+06	5.40601e+06	4.23124e+06	6.84869e+06	6.6228e+06	6.16729e+06	6.35786e+06	6.54476e+06	6.63679e+06	6.95422e+06	6.65503e+06	6.31066e+06	6.41709e+06	6.13193e+06
348	174.087	174.036	174.087	444.575	439.457	462.414	166	35	36	34	9	36	16	3.73884e+07	3.87968e+07	3.98505e+07	3.51816e+07	4.2573e+07	4.88267e+07	4.03173e+06	1.30097e+07	1.10348e+07	3.14368e+07	3.48427e+07	3.71068e+07	1.24052e+07	1.3909e+07	1.87881e+07	1.28579e+07	1.5284e+07	1.66132e+07	2.39876e+07	2.45989e+07	2.43329e+07	2.01741e+07	2.00871e+07	1.96035e+07	4.87786e+06	1.40217e+07	1.43311e+07	3.20696e+07	3.5211e+07	3.60791e+07	1.39716e+07	1.57996e+07	1.64037e+07	1.44665e+07	1.63379e+07	1.73759e+07
349	174.074	173.986	174.124	389.51	364.52	409.324	166	35	36	35	9	35	16	1.18941e+07	1.11786e+07	5.68518e+06	1.15009e+07	1.05909e+07	9.31763e+06	2.70021e+06	1.07363e+07	1.06262e+07	1.17676e+07	1.16291e+07	5.91389e+06	3.62334e+06	6.00739e+06	5.6599e+06	3.72823e+06	1.07765e+07	1.02018e+07	9.68165e+06	9.28746e+06	9.14739e+06	8.79612e+06	5.17051e+06	4.52967e+06	1.00658e+07	4.83559e+06	5.13732e+07	8.78923e+06	8.13474e+06	7.25581e+06	9.52951e+06	4.73012e+06	4.90735e+06	9.03734e+06	9.32867e+06	9.24192e+06
350	174.039	173.985	174.067	334.371	310.187	357.361	84	15	20	17	6	19	7	2.21444e+06	2.04972e+06	2.48517e+06	2.07597e+06	2.47093e+06	2.25167e+06	2.25144e+06	2.63084e+06	2.52806e+06	2.20145e+06	2.2176e+06	2.4581e+06	9.59941e+06	2.3759e+06	2.53157e+06	271579	2.21684e+06	2.34612e+06	2.66199e+06	2.95721e+06	2.53445e+06	2.30306e+06	2.6264e+06	2.43331e+06	2.13994e+06	2.37509e+06	1.51723e+07	2.53035e+06	2.72349e+06	2.86817e+06	2.41847e+06	2.49966e+06	2.44648e+06	2.66459e+06	2.14681e+06	2.55945e+06
351	174.896	174.895	174.953	384.871	369.844	387.068	112	27	23	22	8	20	12	725591	1.13947e+06	1.12881e+06	873147	1.06731e+06	1.01845e+06	11669.1	1.15279e+06	1.10342e+06	960141	1.14346e+06	1.22779e+06	7.25368e+06	837728	920376	33706.4	1.09874e+06	1.09392e+06	908755	1.08593e+06	959954	918923	849529	1.0004e+06	80519.7	997841	2.29988e+07	1.0588e+06	1.14525e+06	1.17287e+06	89759.3	1.14875e+06	973608	122990	1.15722e+06	1.17637e+06
352	175.034	175.031	175.034	85.7079	82.8076	98.8862	107	36	15	36	0	7	13	2.18237e+07	2.11572e+07	2.25721e+07	2.29961e+07	2.18249e+07	2.33471e+07	6.3821e+06	1.44416e+07	1.18713e+07	2.10555e+07	2.15613e+07	2.19439e+07	8.20543e+06	1.11706e+07	1.1395e+07	9.90761e+06	1.31191e+07	1.36891e+07	1.0092e+07	9.16298e+06	9.53874e+06	8.0796e+06	8.31907e+06	8.62807e+06	4.69706e+06	8.2932e+06	8.61561e+06	1.73372e+07	1.58359e+07	1.7062e+07	6.06657e+06	6.53893e+06	6.50924e+06	1.44056e+07	1.31674e+07	1.2807e+07
353	175.044	175.033	175.045	419.143	418.306	420.798	58	6	16	11	0	13	12	2.09655e+06	2.25659e+06	2.35735e+06	2.01718e+06	2.29842e+06	2.72857e+06	463011	1.08821e+06	964702	1.71567e+06	1.89497e+06	2.13745e+06	1.20753e+06	1.04587e+06	1.11104e+06	1.49521e+06	1.19172e+06	1.35263e+06	990281	1.00583e+06	1.11911e+06	1.41808e+06	1.39942e+06	1.48146e+06	279598	805216	841211	1.07299e+06	1.15269e+06	1.31647e+06	606419	728581	873897	769456	988747	1.00613e+06
354	175.119	175.119	175.119	525.008	524.241	525.352	169	36	36	36	9	36	16	4.48944e+09	4.44309e+09	4.4428e+09	4.47523e+09	4.80264e+09	5.15799e+09	1.71719e+09	3.99864e+09	3.3924e+09	4.2683e+09	4.37514e+09	4.45127e+09	3.96266e+09	3.89958e+09	4.23728e+09	4.30356e+09	4.48195e+09	4.52101e+09	4.64393e+09	4.5904e+09	4.58075e+09	4.21906e+09	4.12447e+09	4.16411e+09	1.99939e+09	4.03262e+09	3.97315e+09	4.65668e+09	4.80361e+09	4.8964e+09	4.01381e+09	4.28191e+09	4.30961e+09	4.36699e+09	4.59558e+09	4.64097e+09
355	176.023	176.023	176.023	655.559	653.909	657.216	30	6	2	11	6	5	0	1.57009e+07	1.60728e+07	1.5055e+07	1.57439e+07	1.6351e+07	1.55434e+07	1.95017e+07	1.4007e+07	1.38767e+07	1.65339e+07	1.63675e+07	1.56143e+07	2.1899e+07	1.54911e+07	1.56934e+07	2.09552e+07	1.58058e+07	1.53075e+07	1.62397e+07	1.69557e+07	1.63545e+07	1.65909e+07	1.6788e+07	1.5949e+07	1.4923e+07	1.64479e+07	1.61037e+07	1.6817e+07	1.72313e+07	1.69161e+07	1.68052e+07	1.68831e+07	1.65328e+07	1.76546e+07	1.73488e+07	1.7597e+07
356	176.122	176.12	176.122	524.921	524.078	525.189	169	36	36	36	9	36	16	2.83935e+08	2.81681e+08	2.81412e+08	2.82885e+08	3.03674e+08	3.26059e+08	1.09562e+08	2.53263e+08	2.13856e+08	2.70161e+08	2.74863e+08	2.82669e+08	2.50404e+08	2.4606e+08	2.67424e+08	2.70842e+08	2.84841e+08	2.86818e+08	2.94217e+08	2.90285e+08	2.88934e+08	2.67726e+08	2.60608e+08	2.64075e+08	1.26247e+08	2.56086e+08	2.52251e+08	2.95376e+08	3.04132e+08	3.10266e+08	2.53472e+08	2.71413e+08	2.73165e+08	2.74966e+08	2.91285e+08	2.93823e+08
357	176.071	176.07	176.072	116.213	110.331	117.704	167	36	36	34	9	36	16	4.66593e+07	4.02531e+07	3.55954e+07	4.91972e+07	4.50198e+07	4.2105e+07	3.96137e+07	7.30054e+07	5.46833e+07	4.90672e+07	4.43787e+07	4.1609e+07	9.33592e+07	7.57896e+07	7.32855e+07	8.84376e+07	7.85086e+07	6.92238e+07	1.22892e+08	9.22358e+07	7.02694e+07	1.42455e+08	1.12519e+08	9.08061e+07	1.00862e+08	1.45324e+08	1.17898e+08	1.50446e+08	1.23093e+08	1.00636e+08	1.72282e+08	1.34271e+08	1.10321e+08	1.95281e+08	1.56406e+08	1.28072e+08
358	176.043	176.039	176.047	419.542	417.88	421.049	166	35	36	34	9	36	16	3.63829e+07	3.41217e+07	3.2854e+07	3.54003e+07	3.56998e+07	3.83766e+07	6.31422e+06	2.46717e+07	1.83437e+07	3.19951e+07	3.02658e+07	2.99248e+07	2.33977e+07	2.35544e+07	2.54868e+07	2.70331e+07	2.91036e+07	2.82105e+07	2.81093e+07	2.56862e+07	2.38143e+07	2.64289e+07	2.4645e+07	2.28366e+07	7.70197e+06	2.19082e+07	2.01458e+07	2.93548e+07	2.76779e+07	2.73798e+07	2.43477e+07	2.24652e+07	2.13283e+07	2.72208e+07	2.54025e+07	2.41101e+07
359	176.068	176.066	176.114	352.858	349.818	359.728	167	36	36	34	9	36	16	2.7162e+07	2.8008e+07	2.98035e+07	2.67642e+07	2.72096e+07	2.77859e+07	2.03761e+07	2.92069e+07	3.14123e+07	2.86282e+07	2.98632e+07	3.16421e+07	1.8091e+07	2.97086e+07	2.92961e+07	1.87077e+07	2.19189e+07	2.39799e+07	3.09456e+07	3.22523e+07	3.18327e+07	2.41809e+07	2.42238e+07	2.67024e+07	2.39242e+07	2.45131e+07	2.10104e+07	2.7445e+07	2.84593e+07	2.93736e+07	2.54688e+07	2.94809e+07	3.02129e+07	2.73515e+07	2.72607e+07	3.02158e+07
360	176.092	176.091	176.093	459.323	453.693	462.087	158	36	36	34	0	36	16	3.25498e+07	3.75318e+07	4.732e+07	3.37023e+07	4.37889e+07	6.16212e+07	9.00523e+06	3.34586e+07	2.52205e+07	2.81632e+07	3.47789e+07	4.41149e+07	7.4155e+07	3.33649e+07	4.34828e+07	6.47894e+07	4.26422e+07	4.45913e+07	5.23066e+07	5.39191e+07	5.97951e+07	4.58473e+07	4.74347e+07	5.05622e+07	1.24722e+07	4.05207e+07	4.02957e+07	5.52961e+07	6.56627e+07	8.00705e+07	4.36086e+07	4.63385e+07	4.78763e+07	4.86718e+07	5.09243e+07	5.23873e+07
361	177.118	177.108	177.123	525.372	524.078	525.774	167	36	36	34	9	36	16	1.52426e+07	1.52634e+07	1.47128e+07	1.49165e+07	1.64789e+07	1.77786e+07	5.74395e+06	1.35093e+07	1.15749e+07	1.4364e+07	1.5302e+07	1.52208e+07	1.33029e+07	1.27759e+07	1.48581e+07	1.41801e+07	1.55511e+07	1.59223e+07	1.61838e+07	1.66518e+07	1.61083e+07	1.46002e+07	1.4692e+07	1.51453e+07	7.23817e+06	1.41567e+07	1.36437e+07	1.63908e+07	1.71649e+07	1.80212e+07	1.40318e+07	1.48903e+07	1.50495e+07	1.55484e+07	1.65014e+07	1.69265e+07
362	177.043	177.043	177.044	257.472	247.693	262.947	163	33	36	34	9	36	15	3.88698e+07	9.61642e+07	9.49347e+07	3.93394e+07	3.90436e+07	3.92709e+07	107984	8.62595e+07	2.35897e+07	9.53096e+07	9.65522e+07	3.97189e+07	1.01697e+08	8.5498e+07	9.1515e+07	3.96512e+07	9.75734e+07	9.74758e+07	3.7818e+07	3.87313e+07	3.79705e+07	9.37784e+07	9.32053e+07	9.37533e+07	8.70068e+06	9.17706e+07	9.12845e+07	3.843e+07	3.79115e+07	3.86563e+07	9.55472e+07	9.33337e+07	9.46164e+07	3.91193e+07	3.84793e+07	9.91479e+07
363	177.129	177.102	177.134	354.592	352.524	361.599	152	36	30	29	9	32	16	5.13154e+06	6.58941e+06	8.26377e+06	5.67916e+06	4.48979e+06	3.7682e+06	8.07217e+06	8.99848e+06	9.68979e+06	5.49795e+06	6.76592e+06	7.36607e+06	7.16333e+06	8.0141e+06	8.74967e+06	6.15319e+06	6.96983e+06	8.58658e+06	8.12038e+06	8.55244e+06	9.65193e+06	7.31286e+06	7.42939e+06	7.8065e+06	1.03534e+07	1.56156e+07	1.34775e+07	5.94873e+06	6.63476e+06	7.09908e+06	8.66211e+07	7.85453e+07	7.27141e+07	1.31335e+07	1.35292e+07	1.46114e+07
364	177.09	177.074	177.111	110.087	98.8222	116.984	156	32	32	34	9	33	16	5.82037e+06	5.8131e+06	5.37697e+06	8.1119e+06	8.10524e+06	7.62141e+06	5.19407e+06	8.53433e+06	6.66853e+06	6.31932e+06	6.32658e+06	6.39081e+06	1.0873e+07	8.68241e+06	8.51537e+06	1.71191e+07	1.58198e+07	1.46117e+07	1.88504e+07	1.61316e+07	1.4297e+07	1.71438e+07	1.46199e+07	1.28615e+07	1.42603e+07	2.18723e+07	1.88135e+07	1.4941e+07	1.24001e+07	1.02585e+07	1.87785e+07	1.55065e+07	1.29582e+07	1.93358e+07	1.55221e+07	1.25633e+07
365	177.043	177.043	177.062	207.642	194.311	217.044	101	17	24	18	0	26	16	5.08645e+07	5.10677e+07	5.12335e+07	5.47909e+07	5.12816e+07	5.32177e+07	5.51598e+07	4.87073e+07	7.70624e+07	5.07147e+07	5.14132e+07	5.61422e+07	5.55272e+07	4.97804e+07	5.16666e+07	6.40632e+07	5.1659e+07	5.1063e+07	5.16234e+07	5.46646e+07	5.16819e+07	5.00924e+07	5.10431e+07	5.14338e+07	5.76669e+07	5.15675e+07	5.19821e+07	5.02824e+07	5.029e+07	4.96115e+07	5.15398e+07	5.12716e+07	5.18162e+07	5.34319e+07	5.29054e+07	5.20313e+07
366	177.958	177.958	177.958	656.278	652.999	660.08	95	22	14	25	8	17	9	7.73817e+06	9.74651e+06	9.57335e+06	7.81521e+06	9.78964e+06	9.6666e+06	656807	8.8594e+06	9.16236e+06	7.95162e+06	9.7491e+06	9.66789e+06	652325	8.93816e+06	9.30732e+06	583098	8.945e+06	9.54413e+06	9.3051e+06	1.02301e+07	9.97713e+06	9.17305e+06	1.00126e+07	1.02207e+07	2.55012e+06	1.00011e+07	1.05357e+07	9.25276e+06	1.03558e+07	1.10117e+07	3.25572e+06	1.04403e+07	1.04563e+07	3.78853e+06	9.84034e+06	1.12327e+07
367	178.04	178.022	178.127	386.406	355.022	388.934	170	36	36	34	9	36	16	8.09411e+06	6.5786e+06	4.97288e+06	7.93035e+06	6.67922e+06	6.48261e+06	2.53313e+06	6.17937e+06	4.59634e+06	8.50366e+06	7.15538e+06	6.76453e+06	7.34279e+06	6.69741e+06	4.93629e+06	6.90735e+06	6.4167e+06	4.80098e+06	6.55069e+06	4.63978e+06	4.00596e+06	6.19455e+06	4.70049e+06	4.04335e+06	7.13672e+06	4.52126e+06	3.69118e+06	7.02513e+06	5.32533e+06	4.97748e+06	5.76668e+06	4.53986e+06	4.18085e+06	7.48596e+06	5.12638e+06	4.41069e+06
368	178.059	178.059	178.059	516.892	510.068	530.895	166	35	36	34	9	36	16	3.86231e+07	3.53976e+07	3.40673e+07	4.0669e+07	4.36749e+07	4.55668e+07	7.92739e+06	3.08182e+07	2.06683e+07	3.62248e+07	3.58595e+07	3.61377e+07	1.8696e+07	2.99261e+07	3.16236e+07	2.22147e+07	3.62554e+07	3.41335e+07	4.22363e+07	3.65329e+07	3.27724e+07	3.39717e+07	2.73045e+07	2.73059e+07	1.0905e+07	2.80205e+07	2.47728e+07	4.15587e+07	3.98477e+07	3.69177e+07	2.97682e+07	3.23707e+07	3.04893e+07	3.53878e+07	3.81649e+07	3.47172e+07
369	178.873	178.852	178.894	386.746	385.185	388.62	149	34	31	29	9	32	14	223019	552007	750263	358250	569419	559722	576219	409279	857086	328898	641714	708680	646013	562843	676309	700596	277227	576725	272709	439241	774819	398736	564036	871272	396801	503281	724246	218029	382877	594193	255429	481250	727072	169532	467547	731147
370	179.088	179.086	179.089	522.945	522.41	523.474	166	35	36	34	9	36	16	8.87207e+06	9.30541e+06	9.00972e+06	8.93012e+06	9.90482e+06	1.07747e+07	3.37668e+06	7.27038e+06	6.7893e+06	8.55647e+06	8.96746e+06	8.97391e+06	6.54754e+06	7.02746e+06	8.13066e+06	7.23221e+06	8.35619e+06	8.49806e+06	8.68721e+06	9.28051e+06	8.76355e+06	7.99581e+06	8.30811e+06	8.11958e+06	4.89422e+06	7.70069e+06	7.7284e+06	8.71537e+06	9.53566e+06	9.52416e+06	8.56017e+06	8.05053e+06	8.04009e+06	9.1284e+06	8.17075e+06	8.44054e+06
371	179.041	179.04	179.041	257.449	250.491	262.947	162	33	36	33	9	36	15	3.86533e+07	9.27516e+07	9.11905e+07	9.37799e+07	3.78514e+07	3.63923e+07	99162.4	8.27652e+07	2.32747e+07	9.22121e+07	3.82426e+07	3.76787e+07	9.77249e+07	8.30836e+07	8.79022e+07	3.92429e+07	3.8888e+07	3.77707e+07	3.71337e+07	9.52093e+07	3.95807e+07	9.09817e+07	9.00652e+07	9.04692e+07	8.81668e+06	8.77193e+07	8.78631e+07	3.83698e+07	3.6847e+07	3.68693e+07	9.19817e+07	8.9442e+07	9.1454e+07	3.73144e+07	9.37441e+07	3.72867e+07
372	179.041	179.038	179.053	207.885	194.311	226.949	106	18	25	22	0	25	16	4.98636e+07	4.87621e+07	4.84604e+07	4.86712e+07	4.96661e+07	5.02785e+07	5.27802e+07	4.63118e+07	7.40626e+07	4.81901e+07	5.33018e+07	5.23361e+07	5.26449e+07	4.80075e+07	4.86825e+07	6.15012e+07	5.0624e+07	5.08623e+07	4.92699e+07	4.93664e+07	5.3937e+07	4.81599e+07	4.8669e+07	4.80681e+07	5.58145e+07	4.93735e+07	4.95573e+07	5.06914e+07	4.77571e+07	4.88572e+07	4.93518e+07	4.83699e+07	4.96135e+07	5.17552e+07	4.83483e+07	5.04898e+07
373	179.136	179.082	179.193	68.5688	64.8192	70.2848	81	1	32	0	0	33	15	4.02342e+06	4.09744e+06	3.86387e+06	4.14623e+06	4.3382e+06	4.41623e+06	3.22009e+06	3.79353e+06	3.38898e+06	4.18869e+06	4.15837e+06	4.00711e+06	4.19584e+06	3.52363e+06	4.108e+06	4.54025e+06	4.13704e+06	4.03101e+06	4.1699e+06	4.00552e+06	3.9804e+06	3.95864e+06	3.77298e+06	3.67944e+06	3.42547e+06	3.98172e+06	4.17848e+06	4.21281e+06	4.06534e+06	4.10659e+06	3.84075e+06	3.60575e+06	3.6011e+06	4.30805e+06	4.07671e+06	4.07012e+06
374	180.02	180.003	180.027	430.998	429.164	435.014	167	36	36	34	9	36	16	5.47607e+06	5.48118e+06	5.47266e+06	5.36269e+06	6.10409e+06	6.43421e+06	1.32719e+06	4.85323e+06	3.89625e+06	5.35999e+06	5.29861e+06	5.4873e+06	5.40506e+06	4.61022e+06	5.10138e+06	5.6744e+06	5.39874e+06	5.52038e+06	6.04903e+06	5.98863e+06	5.98781e+06	5.46872e+06	5.59188e+06	5.51321e+06	2.12838e+06	5.19564e+06	5.08469e+06	5.9581e+06	6.40245e+06	6.38925e+06	5.32248e+06	5.56529e+06	5.77121e+06	5.44405e+06	5.73063e+06	5.9265e+06
375	180.087	180.085	180.088	363.588	360.967	371.179	167	36	36	34	9	36	16	3.02499e+07	3.02294e+07	3.50617e+07	3.11013e+07	3.31616e+07	3.42528e+07	1.2255e+07	3.17616e+07	3.19967e+07	2.86659e+07	2.94818e+07	3.1066e+07	3.50635e+07	3.37176e+07	4.15626e+07	3.32086e+07	3.5276e+07	3.92893e+07	3.9595e+07	4.42307e+07	5.19453e+07	4.09821e+07	4.69847e+07	5.32215e+07	2.04044e+07	4.36125e+07	4.46148e+07	3.37462e+07	3.67697e+07	3.7764e+07	3.829e+07	4.44613e+07	4.96066e+07	3.35897e+07	3.79876e+07	4.2907e+07
376	180.102	180.065	180.103	82.7876	80.4244	121.091	170	36	36	34	9	36	16	1.61573e+08	1.51321e+08	1.48923e+08	1.4858e+08	1.49074e+08	1.62958e+08	3.99688e+07	9.02539e+07	7.2549e+07	1.64702e+08	1.63815e+08	1.65673e+08	1.58739e+08	1.22402e+08	1.33067e+08	1.35995e+08	1.18101e+08	1.17065e+08	1.00192e+08	9.60737e+07	9.53059e+07	8.12365e+07	7.86782e+07	7.84567e+07	3.83804e+07	7.27605e+07	7.14489e+07	1.04442e+08	1.06577e+08	1.05095e+08	1.05449e+08	1.0102e+08	1.01437e+08	1.15608e+08	1.09341e+08	1.10628e+08
377	180.079	180.078	180.083	298.829	281.794	301.396	164	33	36	34	9	36	16	9.33481e+06	1.01615e+07	1.03601e+07	9.45841e+06	1.02039e+07	1.00614e+07	2.13441e+06	8.60857e+06	6.72916e+06	9.74495e+06	1.02053e+07	1.044e+07	2.662e+06	8.50207e+06	9.37673e+06	9.1827e+06	9.94186e+06	1.04334e+07	1.28774e+07	1.34883e+07	1.37877e+07	1.2471e+07	1.30824e+07	1.2982e+07	4.62924e+06	1.21509e+07	1.12076e+07	1.3023e+07	1.43711e+07	1.47908e+07	1.18903e+07	1.22772e+07	1.33877e+07	1.27697e+07	1.42034e+07	1.41218e+07
378	180.067	180.066	180.07	234.526	219.144	236.576	157	32	35	33	9	33	15	1.17614e+07	1.0876e+07	1.03013e+07	1.14593e+07	1.18761e+07	1.25503e+07	2.6559e+06	9.23665e+06	7.40282e+06	1.13313e+07	1.09693e+07	1.10871e+07	5.57556e+06	8.76596e+06	9.84637e+06	6.33221e+06	1.10173e+07	1.09035e+07	1.29063e+07	1.22785e+07	1.21305e+07	1.2084e+07	1.18537e+07	1.12893e+07	5.4385e+06	1.05354e+07	1.05178e+07	1.3393e+07	1.33302e+07	1.37713e+07	1.24062e+07	1.16807e+07	1.13435e+07	1.30157e+07	1.25591e+07	1.22514e+07
379	181.028	181.028	181.028	654.549	652.147	658.646	166	35	36	34	9	36	16	1.08361e+09	1.08501e+09	1.08786e+09	1.08573e+09	1.11457e+09	1.13459e+09	1.34781e+09	9.55909e+08	9.51171e+08	1.10776e+09	1.1305e+09	1.13477e+09	1.32749e+09	1.05107e+09	1.07001e+09	1.27567e+09	1.05245e+09	1.04762e+09	1.18285e+09	1.17325e+09	1.19647e+09	1.15233e+09	1.15355e+09	1.14827e+09	9.69535e+08	1.13937e+09	1.13896e+09	1.22627e+09	1.24015e+09	1.24332e+09	1.12291e+09	1.16542e+09	1.15547e+09	1.17394e+09	1.19764e+09	1.23313e+09
380	181.108	181.108	181.109	165.724	165.293	170.039	83	36	1	34	9	1	2	1.41697e+07	1.39723e+07	1.38082e+07	1.50595e+07	1.70513e+07	1.99585e+07	6.93842e+06	1.33403e+07	1.12498e+07	1.33204e+07	1.36866e+07	1.49831e+07	1.45624e+07	1.24418e+07	1.41822e+07	1.52887e+07	1.49648e+07	1.50791e+07	2.3263e+07	2.31192e+07	2.37053e+07	1.38369e+07	1.43319e+07	1.46749e+07	7.35513e+06	1.38536e+07	1.41551e+07	1.50122e+07	1.61304e+07	1.70492e+07	1.51129e+07	1.57516e+07	1.65187e+07	1.36726e+07	1.37648e+07	1.43241e+07
381	181.099	180.904	181.101	371.411	369.576	393.776	25	3	8	0	6	8	0	3.54061e+06	3.63747e+06	3.63679e+06	3.58866e+06	3.58129e+06	3.47244e+06	1.97305e+06	3.17603e+06	3.0605e+06	3.50056e+06	3.45993e+06	3.58891e+06	3.3388e+06	3.57598e+06	3.96582e+06	3.00676e+06	3.65782e+06	3.75055e+06	3.60141e+06	3.87315e+06	4.45908e+06	3.75462e+06	4.38952e+06	4.68473e+06	2.5595e+06	4.107e+06	4.22946e+06	3.2267e+06	3.40558e+06	3.81654e+06	3.76737e+06	3.84109e+06	4.2956e+06	3.42663e+06	3.66332e+06	3.59288e+06
382	181.121	181.103	181.179	69.6337	63.9795	82.2828	157	36	36	28	9	32	16	2.07772e+07	2.01235e+07	1.97049e+07	1.95258e+07	2.03593e+07	2.19457e+07	6.73929e+06	1.31377e+07	1.1009e+07	2.1256e+07	2.10248e+07	2.14781e+07	1.99808e+07	1.63516e+07	1.77925e+07	1.83572e+07	1.70031e+07	1.69398e+07	1.52188e+07	1.47109e+07	1.45132e+07	1.30182e+07	1.27007e+07	1.28417e+07	7.08328e+06	1.13685e+07	1.19242e+07	1.56382e+07	1.59244e+07	1.56434e+07	1.52257e+07	1.47083e+07	1.45548e+07	1.65124e+07	1.5784e+07	1.5985e+07
383	182.081	182.075	182.081	385.579	382.999	387.113	167	36	36	34	9	36	16	2.09637e+08	1.91295e+08	1.9559e+08	2.115e+08	2.28708e+08	2.56083e+08	4.09257e+07	1.7653e+08	1.50199e+08	1.9033e+08	1.82825e+08	1.90524e+08	1.85458e+08	1.74324e+08	2.02993e+08	2.10759e+08	2.15718e+08	2.13227e+08	2.29312e+08	2.19729e+08	2.26216e+08	1.97552e+08	1.97685e+08	2.1501e+08	5.94596e+07	1.90785e+08	2.10779e+08	2.3625e+08	2.3002e+08	2.36185e+08	1.90681e+08	2.05283e+08	2.22998e+08	2.20837e+08	2.19589e+08	2.26677e+08
384	182.032	182.032	182.032	654.644	652.201	658.915	165	35	36	34	9	35	16	6.57984e+07	6.53572e+07	6.65244e+07	6.58689e+07	6.82132e+07	6.82693e+07	8.16279e+07	5.81802e+07	5.76873e+07	6.76068e+07	6.92805e+07	6.87817e+07	8.02405e+07	6.3881e+07	6.45024e+07	7.91936e+07	6.39191e+07	6.41751e+07	7.19027e+07	7.08171e+07	7.28392e+07	7.0849e+07	6.92852e+07	7.05655e+07	5.96659e+07	6.85429e+07	6.86827e+07	7.38761e+07	7.61345e+07	7.55733e+07	6.793e+07	7.13509e+07	7.02095e+07	7.24873e+07	7.21219e+07	7.51116e+07
385	182.19	182.081	182.194	192.236	190.962	196.819	113	28	27	16	4	22	16	91652	86520.1	89188.5	224752	216776	231661	93215.9	178822	141103	320722	321303	346700	270110	224743	256847	70378	72846.3	86584	1.1014e+06	1.12279e+06	1.05748e+06	1.0866e+06	1.09622e+06	1.03199e+06	469009	970558	973487	1.52493e+06	1.55501e+06	1.59567e+06	1.0816e+06	1.11762e+06	1.13297e+06	1.10589e+06	1.02045e+06	1.09757e+06
386	182.113	182.108	182.17	74.5679	69.3733	75.4509	77	35	0	34	7	1	0	1.08044e+07	1.07111e+07	1.07051e+07	1.10004e+07	1.16526e+07	1.24187e+07	4.91308e+06	9.2087e+06	7.76317e+06	1.10833e+07	1.12013e+07	1.15892e+07	1.12506e+07	9.06795e+06	9.88739e+06	1.18011e+07	1.07548e+07	1.09469e+07	1.06599e+07	1.03337e+07	1.00442e+07	1.00414e+07	9.82552e+06	9.73702e+06	5.9084e+06	1.00132e+07	1.01572e+07	1.07076e+07	1.09865e+07	1.08799e+07	1.02689e+07	9.43856e+06	9.70512e+06	1.03333e+07	1.02326e+07	1.00796e+07
387	183.061	183.061	183.061	633.181	629.867	637.416	167	36	36	34	9	36	16	1.43211e+08	1.37094e+08	1.36599e+08	1.50051e+08	1.54252e+08	1.67846e+08	6.55276e+07	9.77858e+07	7.95135e+07	1.50146e+08	1.47099e+08	1.50473e+08	1.57021e+08	1.15593e+08	1.25183e+08	1.64543e+08	1.342e+08	1.31704e+08	1.78589e+08	1.69055e+08	1.69987e+08	1.59487e+08	1.5647e+08	1.52333e+08	8.04244e+07	1.44839e+08	1.40724e+08	1.91431e+08	1.90002e+08	1.95767e+08	1.68302e+08	1.58131e+08	1.57788e+08	1.85297e+08	1.75236e+08	1.734e+08
388	183.084	183.079	183.084	385.334	382.999	386.817	164	33	36	34	9	36	16	2.06075e+07	1.86647e+07	1.85061e+07	2.06833e+07	2.17046e+07	2.44564e+07	7.12618e+06	1.70562e+07	1.45705e+07	1.85684e+07	1.78951e+07	1.82256e+07	1.89687e+07	1.64537e+07	1.92053e+07	2.15901e+07	2.0057e+07	2.04925e+07	2.19533e+07	2.08077e+07	2.14626e+07	1.83865e+07	1.88244e+07	2.06808e+07	6.53616e+06	1.8392e+07	2.04386e+07	2.27415e+07	2.18287e+07	2.26243e+07	1.8087e+07	1.93701e+07	2.04758e+07	2.10943e+07	2.08662e+07	2.14412e+07
389	183.968	183.966	184.001	501.23	495.919	503.425	167	36	36	34	9	36	16	4.83506e+06	4.61967e+06	4.80342e+06	4.65991e+06	4.83048e+06	4.92608e+06	3.57196e+06	4.49785e+06	4.37841e+06	4.61472e+06	4.71509e+06	4.74656e+06	4.41718e+06	4.48702e+06	4.64167e+06	4.56663e+06	4.81133e+06	4.72333e+06	4.72667e+06	4.77142e+06	4.70098e+06	4.82939e+06	4.50257e+06	4.67117e+06	4.17411e+06	4.51565e+06	4.52134e+06	4.91769e+06	4.82215e+06	4.96713e+06	4.62759e+06	4.52173e+06	4.56506e+06	4.67322e+06	4.7809e+06	4.66635e+06
390	184.094	184.094	184.095	422.914	422.101	424.044	167	36	36	34	9	36	16	5.82438e+07	5.83736e+07	5.91135e+07	5.74563e+07	6.46502e+07	7.29645e+07	9.62676e+06	4.83163e+07	3.94413e+07	5.04053e+07	5.39884e+07	5.75891e+07	4.08777e+07	4.57093e+07	5.35812e+07	4.57522e+07	5.9507e+07	6.20982e+07	1.02709e+08	1.02931e+08	1.02187e+08	8.92781e+07	9.04182e+07	8.90991e+07	3.54978e+07	8.12033e+07	8.08969e+07	1.02863e+08	1.05981e+08	1.09833e+08	8.63124e+07	9.03517e+07	9.0881e+07	9.2341e+07	9.65922e+07	9.80831e+07
391	184.045	184.045	184.045	633.656	630.138	637.952	167	36	36	34	9	36	16	3.28922e+07	3.17067e+07	3.14667e+07	3.39053e+07	3.5558e+07	3.91584e+07	1.43893e+07	2.31216e+07	1.92323e+07	3.47598e+07	3.39999e+07	3.478e+07	3.41288e+07	2.66263e+07	2.91415e+07	3.5147e+07	2.98826e+07	3.05344e+07	3.99078e+07	3.89539e+07	3.88896e+07	3.61106e+07	3.61584e+07	3.53019e+07	1.8044e+07	3.24256e+07	3.24855e+07	4.27919e+07	4.3087e+07	4.47178e+07	3.67578e+07	3.63503e+07	3.6372e+07	4.05455e+07	3.95523e+07	3.96957e+07
392	184.097	184.096	184.097	129.196	127.436	132.032	147	27	30	34	8	32	16	1.13008e+07	1.41401e+07	1.57536e+07	1.23858e+07	1.71993e+07	2.1604e+07	3.52611e+06	1.12898e+07	1.06343e+07	1.40929e+07	1.87729e+07	2.20202e+07	1.1309e+07	1.3174e+07	1.74015e+07	1.21893e+07	1.5486e+07	1.79971e+07	1.60093e+07	1.8458e+07	1.59374e+07	1.71761e+07	1.80313e+07	1.96958e+07	5.37763e+06	1.28744e+07	1.50988e+07	1.17356e+07	1.4011e+07	1.57328e+07	1.21118e+07	1.48644e+07	1.68983e+07	1.12418e+07	1.49895e+07	1.65538e+07
393	184.096	184.075	184.097	95.6465	78.2959	97.867	148	36	36	34	9	17	16	2.05302e+07	2.01012e+07	2.13876e+07	2.50473e+07	2.62844e+07	3.10955e+07	1.29663e+07	2.21488e+07	1.87895e+07	2.22708e+07	2.32873e+07	2.57978e+07	2.64297e+07	2.18256e+07	2.47622e+07	3.27579e+07	2.54136e+07	2.65643e+07	5.1347e+07	5.24722e+07	5.50113e+07	4.95183e+07	5.00806e+07	5.28203e+07	1.46241e+07	3.14542e+07	3.3985e+07	3.8987e+07	4.185e+07	4.4241e+07	2.83738e+07	2.94538e+07	3.22341e+07	2.57445e+07	2.69556e+07	3.08994e+07
394	184.538	184.537	184.539	370.284	368.611	373.249	80	15	17	23	3	17	5	1.31699e+06	1.18799e+06	1.17927e+06	1.41718e+06	1.19062e+06	829276	1.49042e+06	1.22842e+06	1.32592e+06	1.63137e+06	1.48064e+06	1.30375e+06	2.0144e+06	1.50343e+06	1.2093e+06	1.88216e+06	1.23016e+06	1.09104e+06	1.17972e+06	1.21068e+06	1.03198e+06	1.51967e+06	1.26245e+06	1.14238e+06	1.85541e+06	1.34718e+06	1.39804e+06	1.05016e+06	1.06963e+06	1.08281e+06	1.49757e+06	1.19265e+06	1.44282e+06	1.49892e+06	1.20128e+06	1.19143e+06
395	185.033	185.031	185.104	444.035	421.791	446.405	166	35	36	34	9	36	16	1.80741e+07	1.86958e+07	1.85593e+07	1.97727e+07	2.1456e+07	2.29666e+07	3.76146e+06	1.50178e+07	1.06327e+07	1.71935e+07	1.74359e+07	1.81269e+07	1.9373e+07	1.47215e+07	1.67015e+07	2.12715e+07	1.94687e+07	1.8703e+07	2.12671e+07	2.05312e+07	2.00964e+07	1.87362e+07	1.83023e+07	1.83221e+07	3.53851e+06	1.61942e+07	1.60991e+07	1.99919e+07	1.98858e+07	2.03494e+07	1.83428e+07	1.91141e+07	1.83904e+07	1.94133e+07	2.0722e+07	1.99178e+07
396	185.059	185.021	185.059	633.422	629.867	658.465	167	36	36	34	9	36	16	2.26398e+07	1.9145e+07	1.8773e+07	2.09039e+07	2.17547e+07	2.30452e+07	9.52953e+06	1.37484e+07	1.12264e+07	2.33016e+07	2.05902e+07	2.10427e+07	2.1881e+07	1.6303e+07	1.75835e+07	2.27099e+07	1.85543e+07	1.81237e+07	2.45522e+07	2.31798e+07	2.33145e+07	2.39818e+07	2.41601e+07	2.1127e+07	2.04471e+07	2.02248e+07	1.95658e+07	2.63311e+07	2.61143e+07	2.64851e+07	2.3511e+07	2.22001e+07	2.19411e+07	2.54873e+07	2.41988e+07	2.38638e+07
397	185.092	185.092	185.094	134.409	132.13	147.628	93	3	33	0	9	32	16	5.68668e+06	5.09925e+06	4.94951e+06	5.87696e+06	5.55866e+06	5.76356e+06	4.37347e+06	1.28581e+07	1.10719e+07	5.15067e+06	5.06542e+06	5.23813e+06	7.42211e+06	6.37054e+06	6.34642e+06	8.66603e+06	7.15285e+06	7.35051e+06	8.86575e+06	8.55186e+06	8.29227e+06	8.30976e+06	7.87239e+06	7.59109e+06	8.94739e+06	7.26874e+06	7.09924e+06	8.70791e+06	8.16749e+06	8.46944e+06	9.93891e+06	8.36305e+06	8.50049e+06	9.51708e+06	7.79583e+06	7.71456e+06
398	185.151	185.099	185.161	68.9371	65.9679	99.1464	92	4	36	0	0	35	16	1.36305e+06	1.29677e+06	1.31741e+06	1.33788e+06	1.40817e+06	1.427e+06	1.15796e+06	1.18067e+06	1.15397e+06	1.37046e+06	1.27177e+06	1.32419e+06	1.10914e+06	882482	876374	1.51033e+06	1.2325e+06	1.29427e+06	1.06877e+06	1.13204e+06	5.70111e+06	219018	217513	216330	1.06637e+06	1.14079e+06	1.06841e+06	1.18198e+06	1.23907e+06	1.26802e+06	879752	829150	919606	1.21374e+06	1.15874e+06	1.07719e+06
399	186.043	186.042	186.043	633.859	630.138	638.327	153	32	32	33	9	32	15	4.4053e+06	4.33623e+06	4.33279e+06	4.70068e+06	4.95376e+06	5.40831e+06	2.18926e+06	2.91427e+06	2.31033e+06	4.74532e+06	4.7376e+06	4.76848e+06	4.78377e+06	3.66382e+06	4.05666e+06	5.0158e+06	4.2139e+06	4.19699e+06	5.7033e+06	5.33899e+06	5.42767e+06	5.04856e+06	4.90456e+06	4.78543e+06	2.51937e+06	4.51109e+06	4.49749e+06	6.06346e+06	5.8505e+06	6.07316e+06	5.17251e+06	5.03558e+06	5.0146e+06	5.49071e+06	5.41e+06	5.4033e+06
400	186.043	185.96	186.078	377.583	372.386	380.447	141	32	30	26	7	31	15	3.13472e+06	3.19499e+06	1.59814e+06	3.09049e+06	3.55184e+06	4.39902e+06	1.03898e+06	2.51175e+06	1.26226e+06	2.98198e+06	2.96075e+06	1.71337e+06	1.61502e+06	2.76272e+06	1.33043e+06	1.89343e+06	2.92272e+06	1.225e+06	3.26014e+06	3.39846e+06	3.52789e+06	2.4324e+06	2.70125e+06	2.71048e+06	1.47167e+06	2.30044e+06	1.18989e+06	3.50296e+06	3.62744e+06	3.66023e+06	2.54846e+06	2.73751e+06	3.06518e+06	3.1874e+06	3.17634e+06	3.43706e+06
401	186.016	186.006	186.045	438.474	436.261	440.372	120	18	17	29	8	35	13	1.61106e+06	1.81278e+06	1.89535e+06	1.94111e+06	1.81797e+06	1.9816e+06	1.29221e+06	1.44477e+06	1.38877e+06	1.69516e+06	1.6691e+06	1.99551e+06	2.05653e+06	1.48357e+06	1.41601e+06	2.31787e+06	1.69188e+06	1.6487e+06	2.00027e+06	1.78612e+06	1.88719e+06	1.75194e+06	1.88773e+06	1.8138e+06	1.04214e+06	1.7472e+06	1.58885e+06	1.89467e+06	1.88867e+06	1.97896e+06	1.58374e+06	1.78913e+06	1.77684e+06	1.64401e+06	1.75525e+06	1.79551e+06
402	186.099	186.08	186.128	98.1391	76.8769	99.8444	119	36	14	34	9	10	16	5.58416e+06	5.35884e+06	5.30682e+06	6.96038e+06	6.99182e+06	7.02069e+06	4.96119e+06	6.11566e+06	5.61645e+06	7.02914e+06	7.15427e+06	7.27472e+06	9.0338e+06	7.08822e+06	7.18578e+06	1.29233e+07	9.11553e+06	8.84893e+06	9.30834e+06	9.37636e+06	9.29702e+06	7.83314e+06	7.68394e+06	7.63777e+06	4.55886e+06	8.15926e+06	8.04033e+06	5.97508e+06	5.79098e+06	6.02846e+06	7.86422e+06	8.08036e+06	7.69649e+06	7.1366e+06	7.29264e+06	7.46212e+06
403	186.121	186.118	186.126	513.616	512.581	516.761	77	8	18	15	1	27	8	2.59921e+06	2.25863e+06	2.36409e+06	2.48544e+06	2.43347e+06	2.42324e+06	1.2056e+06	1.84169e+06	1.68089e+06	2.48841e+06	2.20517e+06	2.16703e+06	2.06413e+06	1.97334e+06	1.9603e+06	2.17114e+06	2.12344e+06	2.02942e+06	2.40612e+06	2.13879e+06	2.09544e+06	2.18406e+06	2.01509e+06	2.02215e+06	1.52051e+06	1.85729e+06	1.74419e+06	2.31869e+06	2.26914e+06	2.19745e+06	2.00373e+06	2.08933e+06	1.90588e+06	2.17667e+06	2.11645e+06	1.92823e+06
404	186.891	186.891	186.895	274.731	242.052	279.696	35	9	0	14	6	5	1	282273	697192	567309	282664	505118	357882	515128	897374	888303	310669	638514	529497	226167	905640	1.00663e+06	230355	788191	816596	566794	596337	464804	612025	599240	590186	635198	848537	739460	501355	515002	402950	324327	863830	714308	304020	738070	629780
405	186.995	186.995	186.996	406.534	406.18	416.077	169	36	36	36	9	36	16	4.81665e+09	4.70452e+09	4.72584e+09	4.79655e+09	4.93333e+09	5.1404e+09	2.83743e+09	4.48356e+09	4.07631e+09	4.73448e+09	4.75987e+09	4.84048e+09	4.99851e+09	4.37468e+09	4.61155e+09	5.18945e+09	4.82311e+09	4.83461e+09	4.9623e+09	4.87439e+09	4.87557e+09	4.75349e+09	4.73235e+09	4.68676e+09	3.07613e+09	4.46697e+09	4.49143e+09	5.03846e+09	5.05205e+09	5.15013e+09	4.60148e+09	4.661e+09	4.67468e+09	4.75755e+09	4.8159e+09	4.85749e+09
406	187.071	187.071	187.071	277.921	269.237	281.288	130	26	36	20	3	30	15	5.55458e+07	5.60788e+07	2.84404e+07	3.14209e+07	2.62449e+07	2.31778e+07	1.20331e+07	2.78279e+07	2.47261e+07	5.13153e+07	2.79869e+07	2.61463e+07	3.57581e+07	2.81293e+07	2.80675e+07	3.76859e+07	3.12159e+07	2.87252e+07	2.81941e+07	2.69738e+07	5.14454e+07	3.24207e+07	5.18737e+07	5.22856e+07	1.90402e+07	2.88477e+07	4.67685e+07	2.89657e+07	2.6229e+07	2.57109e+07	4.87552e+07	4.96511e+07	2.75628e+07	3.56723e+07	2.94205e+07	2.73587e+07
407	187.999	187.998	187.999	406.6	406.326	416.077	169	36	36	36	9	36	16	1.98563e+08	1.90436e+08	1.93357e+08	1.98346e+08	2.04599e+08	2.11116e+08	1.17555e+08	1.86631e+08	1.70514e+08	1.95137e+08	1.96137e+08	1.96758e+08	2.09702e+08	1.81647e+08	1.89335e+08	2.20033e+08	2.00162e+08	1.98192e+08	2.05538e+08	2.00267e+08	2.00174e+08	1.97774e+08	1.96973e+08	1.95361e+08	1.27183e+08	1.83134e+08	1.84552e+08	2.07309e+08	2.0248e+08	2.10247e+08	1.91415e+08	1.91907e+08	1.89584e+08	1.96816e+08	1.97976e+08	2.00842e+08
408	188.071	188.07	188.073	344.134	343.259	351.179	167	36	36	34	9	36	16	2.81246e+08	2.76681e+08	2.62947e+08	2.10156e+08	2.59351e+08	3.10985e+08	1.43533e+07	1.82989e+08	1.12989e+08	1.90508e+08	2.04796e+08	2.09498e+08	1.59975e+08	1.79158e+08	2.3184e+08	2.02876e+08	2.85893e+08	2.84415e+08	3.3025e+08	3.08523e+08	3.10267e+08	2.31723e+08	2.29151e+08	2.14742e+08	3.49691e+07	2.27289e+08	1.90611e+08	2.85263e+08	2.99422e+08	3.11765e+08	2.68998e+08	2.78756e+08	2.69761e+08	2.69998e+08	2.87188e+08	2.85293e+08
409	188.175	188.165	188.176	525.096	521.599	533.102	155	36	31	36	0	36	16	1.56046e+08	1.44474e+08	1.40351e+08	1.31404e+08	1.38151e+08	1.44652e+08	2.14996e+07	6.12868e+07	4.85428e+07	1.23769e+08	1.1968e+08	1.21828e+08	8.0495e+07	7.55564e+07	8.24353e+07	6.39158e+07	6.66836e+07	6.52824e+07	1.45524e+07	1.77807e+07	1.34513e+07	2.22761e+07	2.11027e+07	1.98844e+07	6.34229e+06	1.32527e+07	1.26428e+07	2.91434e+07	2.90688e+07	3.05274e+07	1.79156e+07	1.68329e+07	1.66521e+07	2.27712e+07	2.16012e+07	2.13535e+07
410	189	188.999	189.002	406.51	406.18	416.079	169	36	36	36	9	36	16	3.67815e+07	3.35748e+07	3.45075e+07	3.6101e+07	3.67963e+07	3.73775e+07	2.20341e+07	3.36277e+07	3.05185e+07	3.66037e+07	3.40455e+07	3.74047e+07	3.74608e+07	3.25015e+07	3.45237e+07	3.91069e+07	3.44866e+07	3.58465e+07	3.68343e+07	3.7314e+07	3.61167e+07	3.52414e+07	3.59602e+07	3.47382e+07	2.46127e+07	3.29117e+07	3.33628e+07	3.85097e+07	3.83041e+07	3.87033e+07	3.3991e+07	3.48113e+07	3.40239e+07	3.55375e+07	3.64946e+07	3.74529e+07
411	189.075	189.074	189.079	343.889	343.064	351.179	165	34	36	34	9	36	16	3.24306e+07	3.1003e+07	2.96193e+07	2.37556e+07	2.95274e+07	3.46395e+07	2.79206e+06	2.04902e+07	1.33599e+07	2.20935e+07	2.32158e+07	2.30327e+07	1.85662e+07	2.06752e+07	2.64015e+07	2.33153e+07	3.17441e+07	3.18268e+07	3.67895e+07	3.39524e+07	3.45208e+07	2.52491e+07	2.55942e+07	2.43766e+07	4.85685e+06	2.5257e+07	2.1254e+07	3.10857e+07	3.37535e+07	3.38103e+07	3.0949e+07	3.15861e+07	3.02913e+07	3.064e+07	3.19249e+07	3.22597e+07
412	189.014	189.01	189.038	86.6836	82.4094	88.1694	85	36	35	0	0	0	14	9.50245e+06	1.08185e+07	1.01846e+07	9.50391e+06	1.08637e+07	1.0123e+07	7.33758e+06	9.8249e+06	1.17269e+07	9.55603e+06	1.07184e+07	9.95888e+06	5.15853e+06	8.91439e+06	8.75408e+06	5.15897e+06	8.3202e+06	8.35505e+06	8.85432e+06	9.45619e+06	9.19174e+06	8.08633e+06	8.52126e+06	8.00295e+06	1.12802e+07	9.01239e+06	8.14443e+06	9.04843e+06	9.2396e+06	9.47183e+06	6.66399e+06	9.63473e+06	8.23595e+06	6.87444e+06	9.947e+06	8.3634e+06
413	189.157	189.155	189.16	511.998	511.507	513.287	169	36	36	36	9	36	16	1.38403e+08	1.38565e+08	1.42182e+08	1.35368e+08	1.58168e+08	1.86164e+08	2.27143e+07	9.55501e+07	7.2221e+07	1.32733e+08	1.39989e+08	1.49566e+08	7.94729e+07	9.34072e+07	1.10452e+08	8.92224e+07	1.16234e+08	1.18236e+08	1.73709e+08	1.70052e+08	1.72121e+08	1.38189e+08	1.32604e+08	1.37229e+08	4.13046e+07	1.19674e+08	1.18242e+08	1.81977e+08	1.89972e+08	1.9713e+08	1.26677e+08	1.42601e+08	1.44778e+08	1.51468e+08	1.6413e+08	1.66993e+08
414	189.989	189.988	190.002	383.585	380.944	386.638	151	32	36	33	1	34	15	1.50298e+07	1.05518e+07	8.15055e+06	1.51754e+07	1.5889e+07	1.8286e+07	797887	9.04054e+06	3.84889e+06	1.41264e+07	1.12969e+07	1.02948e+07	2.18672e+06	5.69127e+06	6.05703e+06	3.08028e+06	1.2367e+07	1.06124e+07	1.79941e+07	1.35526e+07	1.10533e+07	1.1948e+07	9.41615e+06	7.16013e+06	2.29326e+06	6.52339e+06	4.49052e+06	2.20298e+07	1.83742e+07	1.86133e+07	1.24958e+07	1.01513e+07	8.75393e+06	1.75025e+07	1.3801e+07	1.15971e+07
415	190.061	190.017	190.071	340.32	336.53	347.243	167	36	36	34	9	36	16	2.66544e+07	2.77287e+07	2.72266e+07	2.72579e+07	2.93869e+07	2.98746e+07	1.32221e+07	2.38019e+07	2.13896e+07	2.67989e+07	2.76663e+07	2.70789e+07	2.36551e+07	2.34079e+07	2.62329e+07	2.80568e+07	2.77572e+07	2.87901e+07	2.76269e+07	2.73914e+07	2.76001e+07	2.66644e+07	2.73131e+07	2.7239e+07	1.68013e+07	2.49197e+07	2.15846e+07	2.72654e+07	2.85341e+07	2.85135e+07	2.57692e+07	2.59512e+07	2.54468e+07	2.67271e+07	2.73965e+07	2.80497e+07
416	190.053	190.051	190.107	266.481	233.817	271.703	169	36	36	34	9	36	16	1.81519e+07	1.81082e+07	1.74874e+07	2.76164e+07	2.81914e+07	2.75459e+07	1.39612e+07	2.08968e+07	1.86214e+07	2.10876e+07	2.08409e+07	2.01111e+07	2.3304e+07	2.17599e+07	2.32262e+07	2.55795e+07	2.41613e+07	2.43971e+07	8.97518e+06	8.935e+06	8.7488e+06	1.75645e+07	1.76967e+07	1.73015e+07	1.00808e+07	1.27036e+07	1.28367e+07	1.35608e+07	1.32705e+07	1.32753e+07	1.03819e+07	1.00372e+07	9.92011e+06	1.40361e+07	1.39815e+07	1.36426e+07
417	190.156	190.15	190.163	511.283	510.635	512.09	167	36	36	34	9	36	16	1.29307e+07	1.31469e+07	1.34815e+07	1.2821e+07	1.47944e+07	1.7575e+07	1.81621e+06	9.20708e+06	7.20032e+06	1.25899e+07	1.31254e+07	1.40811e+07	7.08669e+06	8.97402e+06	1.06765e+07	7.90363e+06	1.10475e+07	1.13324e+07	1.64343e+07	1.63695e+07	1.64492e+07	1.34336e+07	1.27065e+07	1.33614e+07	3.9591e+06	1.17063e+07	1.16365e+07	1.73579e+07	1.82728e+07	1.88802e+07	1.18236e+07	1.39363e+07	1.40881e+07	1.41665e+07	1.58572e+07	1.58901e+07
418	191.04	191.04	191.04	444.802	442.247	447.267	168	36	36	35	9	36	16	1.75064e+08	1.73581e+08	1.72952e+08	1.75447e+08	1.83425e+08	1.89836e+08	6.10604e+07	1.556e+08	1.40495e+08	1.68529e+08	1.73417e+08	1.74664e+08	1.47218e+08	1.55041e+08	1.65585e+08	1.58811e+08	1.72306e+08	1.74568e+08	1.79845e+08	1.77423e+08	1.76914e+08	1.71411e+08	1.74452e+08	1.70177e+08	9.19517e+07	1.61428e+08	1.60216e+08	1.78363e+08	1.83388e+08	1.81012e+08	1.69887e+08	1.70428e+08	1.72656e+08	1.74771e+08	1.77797e+08	1.78346e+08
419	191.082	191.08	191.083	99.1722	96.2123	101.902	167	36	36	34	9	36	16	1.69991e+07	1.73678e+07	1.7241e+07	1.45552e+07	1.46019e+07	1.45384e+07	9.7481e+06	1.71644e+07	1.56733e+07	1.38495e+07	1.40423e+07	1.419e+07	1.86935e+07	1.64321e+07	1.65052e+07	1.85285e+07	1.68356e+07	1.67435e+07	1.78647e+07	1.81275e+07	1.8051e+07	1.58062e+07	1.54465e+07	1.49681e+07	1.02257e+07	1.71192e+07	1.61038e+07	1.55346e+07	1.52994e+07	1.51012e+07	1.7578e+07	1.8323e+07	1.76158e+07	1.6258e+07	1.69503e+07	1.59615e+07
420	191.077	191.076	191.077	527.152	526.645	527.6	167	36	36	34	9	36	16	4.84038e+07	4.94522e+07	4.809e+07	4.84356e+07	5.21141e+07	5.39478e+07	1.33319e+07	3.9244e+07	3.38945e+07	4.53181e+07	4.78422e+07	4.77423e+07	2.70446e+07	3.78659e+07	4.00475e+07	3.12376e+07	4.34786e+07	4.30134e+07	4.72959e+07	4.66575e+07	4.46069e+07	4.49531e+07	4.11833e+07	4.27508e+07	2.66779e+07	4.07212e+07	3.87235e+07	4.75986e+07	4.87628e+07	4.78579e+07	4.71647e+07	4.17579e+07	4.04619e+07	4.89669e+07	4.30673e+07	4.27277e+07
421	191.08	191.036	191.082	180.015	177.541	194.386	91	15	26	18	0	26	6	6.45644e+06	7.21051e+06	7.27792e+06	6.25578e+06	7.60688e+06	8.1855e+06	3.94972e+06	5.30157e+06	4.58202e+06	5.62159e+06	6.84159e+06	7.79054e+06	1.02236e+07	5.39268e+06	7.2482e+06	1.16735e+07	7.6519e+06	7.88124e+06	6.98133e+06	6.66902e+06	6.78716e+06	6.29255e+06	6.28574e+06	6.61918e+06	3.1255e+06	5.99776e+06	6.03528e+06	6.5413e+06	7.1366e+06	7.30663e+06	5.63057e+06	6.09426e+06	6.03831e+06	5.94089e+06	6.60644e+06	6.98989e+06
422	191.984	191.983	192.024	384.575	382.746	386.128	167	36	36	34	9	36	16	5.92946e+07	4.58199e+07	3.68951e+07	5.48656e+07	5.0047e+07	4.95436e+07	3.17884e+06	3.18397e+07	1.74874e+07	7.11611e+07	6.00344e+07	5.28357e+07	4.08751e+07	2.6626e+07	2.44592e+07	6.35158e+07	4.05743e+07	3.34329e+07	1.89285e+07	1.38022e+07	1.1857e+07	1.90861e+07	1.48188e+07	1.14017e+07	7.94303e+06	1.70354e+07	1.31824e+07	4.12535e+07	3.506e+07	3.21709e+07	1.8487e+07	1.36655e+07	1.12018e+07	3.52969e+07	2.54594e+07	2.0331e+07
423	192.087	192.052	192.087	191.145	170.537	206.913	165	36	36	34	7	36	16	5.80226e+07	5.34592e+07	5.10863e+07	6.07455e+07	5.50935e+07	5.20429e+07	7.04237e+07	8.842e+07	8.33363e+07	5.45265e+07	4.97137e+07	4.9029e+07	1.01971e+08	8.54042e+07	8.35034e+07	1.07956e+08	9.14978e+07	8.81218e+07	9.20977e+07	8.6933e+07	8.26559e+07	9.40147e+07	8.92134e+07	8.5435e+07	1.07083e+08	1.00216e+08	9.77329e+07	8.6802e+07	8.19666e+07	7.97685e+07	1.1314e+08	9.78997e+07	9.41278e+07	1.13266e+08	1.00058e+08	9.51514e+07
424	192.026	192.025	192.111	463.661	444.934	496.909	175	36	36	33	9	36	16	4.00761e+07	4.0964e+07	4.09748e+07	3.6739e+07	3.86922e+07	4.07939e+07	1.04164e+07	2.34808e+07	2.08123e+07	3.61319e+07	3.66284e+07	3.78585e+07	2.66858e+07	2.59942e+07	2.83622e+07	2.63091e+07	2.56243e+07	2.62788e+07	2.99285e+07	3.07484e+07	3.03313e+07	2.84643e+07	2.87297e+07	2.9183e+07	1.43975e+07	2.3102e+07	2.41782e+07	3.61727e+07	3.77594e+07	3.84504e+07	2.3879e+07	2.41409e+07	2.52926e+07	2.44279e+07	2.52414e+07	2.67742e+07
425	192.052	192.052	192.058	324.189	312.386	325.994	107	33	24	11	9	16	14	4.62124e+07	4.57398e+07	4.45177e+07	4.46879e+07	4.80838e+07	5.20427e+07	1.58046e+07	5.65116e+07	4.25839e+07	6.70754e+07	6.76718e+07	6.80263e+07	4.67724e+07	5.72469e+07	6.77979e+07	5.50364e+07	8.18259e+07	8.29046e+07	4.7238e+07	4.66973e+07	4.77011e+07	7.95526e+07	7.79987e+07	7.77833e+07	1.76435e+07	6.33118e+07	5.70831e+07	8.11984e+07	8.4371e+07	8.62361e+07	4.45632e+07	4.35864e+07	4.46454e+07	7.86434e+07	7.88066e+07	7.93069e+07
426	192.059	192.058	192.065	350.722	349.818	357.625	78	5	18	26	0	25	4	6.40244e+07	6.23868e+07	5.92553e+07	8.49386e+07	9.40831e+07	1.02182e+08	1.06964e+07	5.63706e+07	4.25116e+07	6.68022e+07	6.7688e+07	6.7947e+07	2.41971e+07	5.70866e+07	6.74208e+07	3.22578e+07	8.16918e+07	8.27074e+07	5.96433e+07	5.83427e+07	5.89345e+07	7.939e+07	7.78917e+07	7.76171e+07	2.42519e+07	6.34019e+07	5.70599e+07	8.16639e+07	8.47923e+07	8.66554e+07	6.08091e+07	5.75137e+07	5.8306e+07	7.89415e+07	7.89792e+07	7.9257e+07
427	192.122	192.063	192.123	106.69	103.895	140.095	65	9	9	11	9	21	0	7.73012e+06	9.79798e+06	1.02082e+07	1.45819e+07	2.20173e+07	2.8459e+07	2.28087e+06	9.6472e+06	9.3898e+06	1.11367e+07	1.55028e+07	1.90162e+07	6.80289e+06	8.83326e+06	1.19189e+07	6.58198e+06	9.63834e+06	1.17045e+07	7.50422e+06	9.10167e+06	9.96759e+06	9.92802e+06	1.19465e+07	1.39261e+07	5.45781e+06	1.3654e+07	1.61326e+07	1.33749e+07	1.7581e+07	2.05843e+07	7.27928e+06	9.87135e+06	1.13872e+07	1.00392e+07	1.35223e+07	1.57966e+07
428	192.102	192.102	192.154	77.2274	66.9306	78.2255	36	24	6	5	1	0	0	9.76271e+06	9.0643e+06	9.73812e+06	1.00788e+07	1.03748e+07	1.22142e+07	1.15992e+07	2.1126e+07	1.6633e+07	8.54251e+06	9.0615e+06	9.59227e+06	3.94549e+07	2.57774e+07	2.78797e+07	2.90365e+07	2.14996e+07	2.19626e+07	1.15555e+07	1.05212e+07	1.13821e+07	9.62455e+06	8.71698e+06	9.38766e+06	9.28796e+06	1.97005e+07	2.01192e+07	8.57415e+06	8.12625e+06	8.80598e+06	2.01017e+07	1.87887e+07	2.02701e+07	2.1772e+07	1.99031e+07	2.10248e+07
429	193.067	193.028	193.074	443.877	441.266	462.825	164	33	36	34	9	36	16	3.46703e+06	5.8964e+06	5.89036e+06	3.99782e+06	4.13911e+06	4.31194e+06	947146	3.08649e+06	1.65209e+06	3.36245e+06	3.421e+06	3.65734e+06	2.82032e+06	3.12966e+06	3.43318e+06	3.1734e+06	3.85047e+06	3.78898e+06	4.17908e+06	4.2576e+06	4.26992e+06	3.35856e+06	3.91127e+06	4.12359e+06	1.70065e+06	3.35492e+06	3.10594e+06	3.74059e+06	5.86954e+06	5.72221e+06	3.82996e+06	3.81705e+06	3.88144e+06	3.83036e+06	4.07915e+06	3.90741e+06
430	193.02	192.997	193.073	376.758	354.056	383.808	144	33	31	27	9	26	16	6.88918e+06	6.04856e+06	7.02907e+06	6.92088e+06	6.8648e+06	6.78008e+06	4.201e+06	6.05214e+06	4.81099e+06	6.6615e+06	6.07568e+06	5.87531e+06	2.30068e+07	5.09298e+06	6.34097e+06	2.653e+07	7.67113e+06	8.25295e+06	7.83839e+06	7.85519e+06	8.09942e+06	8.33463e+06	7.48532e+06	8.90656e+06	2.59676e+06	7.48927e+06	8.168e+06	7.39617e+06	7.5975e+06	7.60096e+06	8.61493e+06	7.1274e+06	7.71338e+06	8.7786e+06	6.97834e+06	7.77342e+06
431	193.075	193.044	193.084	348.715	325.674	353.817	91	14	29	17	7	23	1	4.74738e+06	5.45049e+06	5.12751e+06	7.75757e+06	8.70576e+06	9.62015e+06	2.21931e+06	4.58005e+06	4.11908e+06	4.98431e+06	5.41808e+06	5.66932e+06	3.88618e+06	4.65948e+06	6.48699e+06	5.53754e+06	7.14572e+06	8.09072e+06	5.25987e+06	6.1862e+06	6.34726e+06	7.45855e+06	7.6036e+06	8.08629e+06	2.50839e+06	6.2378e+06	5.3178e+06	7.34784e+06	8.56133e+06	9.04797e+06	5.07422e+06	4.83388e+06	5.3878e+06	6.92303e+06	7.62994e+06	8.28481e+06
432	193.15	193.128	193.161	73.9402	67.8826	79.6912	167	36	36	34	9	36	16	1.30653e+07	1.31718e+07	1.40772e+07	2.12827e+07	2.52552e+07	3.16276e+07	7.08665e+06	1.23223e+07	1.10024e+07	1.64302e+07	1.74041e+07	1.98675e+07	1.50243e+07	1.28777e+07	1.58845e+07	9.49226e+06	8.81522e+06	9.19243e+06	1.44473e+07	1.48872e+07	1.619e+07	7.90327e+06	8.12896e+06	8.76114e+06	7.08945e+06	1.17356e+07	1.26812e+07	1.46199e+07	1.58848e+07	1.78549e+07	1.10517e+07	1.08686e+07	1.1987e+07	1.58512e+07	1.69408e+07	1.88965e+07
433	194.032	194.011	194.118	383.765	383.182	401.155	169	36	36	36	9	36	16	1.30118e+08	9.64789e+07	8.12262e+07	1.26777e+08	1.0008e+08	9.01893e+07	7.02278e+07	8.62508e+07	6.35607e+07	1.3232e+08	1.0189e+08	8.94811e+07	1.17407e+08	8.61088e+07	7.42178e+07	1.4227e+08	9.47222e+07	7.72162e+07	1.01588e+08	7.42154e+07	6.55074e+07	9.75373e+07	7.39776e+07	6.56941e+07	7.73209e+07	7.65568e+07	6.20689e+07	1.0937e+08	8.75865e+07	7.95662e+07	1.02578e+08	7.82136e+07	6.57377e+07	1.1535e+08	8.48274e+07	7.32909e+07
434	194.081	194.081	194.081	205.668	183.694	206.717	167	36	36	34	9	36	16	7.54017e+07	7.2308e+07	7.09859e+07	7.75974e+07	7.93024e+07	8.29105e+07	1.84251e+07	6.59629e+07	5.18625e+07	7.46136e+07	7.4561e+07	7.54211e+07	6.69189e+07	6.25905e+07	6.91923e+07	7.49407e+07	7.42763e+07	7.39129e+07	3.75185e+07	3.70638e+07	3.63858e+07	3.70829e+07	3.61962e+07	3.6013e+07	1.71676e+07	4.09912e+07	4.05973e+07	4.22308e+07	4.22392e+07	4.34193e+07	3.88869e+07	3.9518e+07	3.94187e+07	4.62159e+07	4.62949e+07	4.60093e+07
435	194.103	194.102	194.106	458.376	453.025	461.554	158	36	36	34	0	36	16	5.23689e+07	5.59114e+07	6.62573e+07	5.43167e+07	6.58435e+07	8.75027e+07	1.59441e+07	5.40107e+07	4.07046e+07	4.6057e+07	5.16594e+07	6.2319e+07	1.07818e+08	5.48071e+07	6.72914e+07	9.60838e+07	6.81653e+07	6.97046e+07	8.38224e+07	8.27166e+07	8.82398e+07	7.29679e+07	7.30833e+07	7.57634e+07	2.32343e+07	6.44544e+07	6.38462e+07	8.76208e+07	9.72414e+07	1.14587e+08	7.14737e+07	7.28161e+07	7.3866e+07	7.92056e+07	8.08556e+07	8.12059e+07
436	194.083	194.081	194.205	96.4809	66.8363	97.7765	130	27	24	31	4	26	11	1.00989e+07	9.64363e+06	9.36732e+06	1.70632e+07	1.74205e+07	1.88646e+07	4.39251e+06	6.46003e+06	4.95051e+06	1.64308e+07	1.60558e+07	1.63991e+07	1.2592e+07	9.52016e+06	9.8847e+06	1.46762e+07	1.21656e+07	1.15185e+07	380632	376164	417039	198371	5.925e+06	195055	4.00311e+06	6.20332e+06	182179	1.24487e+07	1.17628e+07	1.22673e+07	4.7882e+06	4.70142e+06	4.56082e+06	1.31162e+07	1.21887e+07	1.21598e+07
437	195.123	195.122	195.123	101.024	98.5489	102.692	167	36	36	34	9	36	16	1.06815e+08	1.02736e+08	1.02676e+08	1.85455e+08	2.02117e+08	2.28008e+08	4.79101e+07	1.22399e+08	1.00761e+08	1.17652e+08	1.2036e+08	1.29574e+08	1.28383e+08	1.08311e+08	1.20658e+08	5.63927e+08	5.26091e+08	5.21315e+08	4.55695e+08	4.44366e+08	4.46975e+08	3.19689e+08	3.0548e+08	3.10776e+08	2.56804e+08	5.52307e+08	5.38022e+08	1.01411e+08	1.03618e+08	1.09032e+08	2.32208e+08	2.29715e+08	2.32725e+08	7.52075e+07	7.39506e+07	7.69271e+07
438	195.008	195.002	195.027	383.338	332.537	390.482	162	33	35	34	6	36	16	5.3773e+06	4.37283e+06	3.91291e+06	5.23858e+06	4.36147e+06	3.82258e+06	3.4496e+06	3.66972e+06	3.00726e+06	5.37232e+06	4.51522e+06	4.17705e+06	6.46353e+06	3.91342e+06	4.12378e+06	8.29568e+06	4.14566e+06	3.87584e+06	4.28712e+06	3.57365e+06	3.1883e+06	4.52575e+06	3.64356e+06	3.60837e+06	3.40624e+06	3.93758e+06	6.38214e+07	4.37509e+06	3.83837e+06	3.57388e+06	4.80668e+06	4.00629e+06	3.25899e+06	4.90476e+06	4.16491e+06	3.99367e+06
439	195.998	195.997	196.006	383.972	345.342	385.129	167	35	36	34	9	36	16	1.3762e+07	1.05431e+07	8.74025e+06	1.33812e+07	1.16445e+07	1.12496e+07	2.93459e+06	9.5706e+06	6.6521e+06	1.41469e+07	1.1477e+07	9.84252e+06	1.50985e+07	9.44035e+06	9.32031e+06	1.95331e+07	1.11915e+07	1.02911e+07	1.11609e+07	9.30902e+06	9.0626e+06	1.00745e+07	8.8676e+06	8.44224e+06	4.92267e+06	9.24456e+06	1.99703e+07	1.26836e+07	1.09708e+07	1.05421e+07	1.21566e+07	9.75811e+06	1.01306e+07	1.39737e+07	1.12615e+07	1.09275e+07
440	196.064	196.064	196.064	189.589	182.156	196.066	159	33	35	31	9	35	16	6.23586e+07	6.18424e+07	6.21829e+07	6.27675e+07	6.16735e+07	6.1881e+07	9.27804e+06	6.03576e+07	5.99276e+07	6.22304e+07	6.25912e+07	6.25964e+07	9.48286e+06	6.27424e+07	6.2552e+07	9.47215e+06	6.37574e+07	6.36754e+07	6.36082e+07	6.26596e+07	6.17452e+07	6.27209e+07	6.3633e+07	6.27977e+07	5.27862e+07	6.42452e+07	6.34271e+07	6.22627e+07	6.41081e+07	6.31399e+07	6.18551e+07	6.19704e+07	6.21904e+07	6.18566e+07	6.18826e+07	6.18718e+07
441	196.09	196.043	196.125	100.487	71.4646	102.075	105	17	36	14	0	36	2	5.10813e+07	5.14343e+07	5.06306e+07	5.40739e+07	2.51275e+06	4.00268e+06	1.61222e+07	5.33474e+07	5.23702e+07	5.14322e+07	5.22155e+07	5.10045e+07	1.85109e+07	5.22679e+07	5.31113e+07	4.99301e+07	7.24072e+07	7.29119e+07	6.58672e+07	6.6833e+07	6.49236e+07	5.92548e+07	5.85597e+07	5.76819e+07	6.00573e+07	7.58855e+07	7.26149e+07	4.88779e+07	5.02898e+07	2.531e+06	5.54951e+07	5.56513e+07	5.52292e+07	4.9931e+07	4.96941e+07	4.81629e+07
442	196.064	196.064	196.065	268.525	235.41	274.44	167	36	36	34	9	36	16	8.27634e+07	8.81814e+07	8.85927e+07	8.31801e+07	9.19542e+07	9.53816e+07	9.79123e+06	8.71148e+07	7.8991e+07	8.25844e+07	8.66602e+07	8.56071e+07	1.31828e+07	8.22928e+07	8.80943e+07	1.3808e+07	8.73212e+07	9.07172e+07	8.77324e+07	8.96295e+07	9.14562e+07	8.6752e+07	8.84946e+07	8.9843e+07	6.26429e+07	8.878e+07	8.91084e+07	9.28725e+07	9.39058e+07	9.63444e+07	8.33488e+07	8.74923e+07	8.77544e+07	1.46116e+08	1.58607e+08	1.57064e+08
443	196.865	196.865	196.865	189.523	186.491	192.648	58	17	0	26	8	0	7	1.48629e+06	1.5961e+06	1.57771e+06	1.53178e+06	1.61664e+06	1.49635e+06	1.43841e+06	1.59978e+06	1.71939e+06	1.65554e+06	1.60442e+06	1.62705e+06	1.08979e+06	1.69083e+06	1.71536e+06	933305	1.63232e+06	1.60191e+06	1.67278e+06	1.53347e+06	1.55822e+06	1.53862e+06	1.58687e+06	1.67594e+06	1.53476e+06	1.67393e+06	1.7111e+06	1.53197e+06	1.69918e+06	1.61983e+06	1.54708e+06	1.63766e+06	1.65761e+06	1.55391e+06	1.63058e+06	1.5342e+06
444	196.952	196.947	197.001	386.324	337.245	396.124	134	32	29	25	6	27	14	2.47234e+06	2.36138e+06	2.35024e+06	2.72773e+06	2.60494e+06	3.0082e+06	1.84715e+07	1.92119e+06	1.92713e+06	2.374e+06	2.25372e+06	2.41597e+06	2.07134e+08	1.84419e+06	2.14631e+06	3.02205e+06	2.21386e+06	2.27537e+06	2.4552e+06	2.3474e+06	2.39848e+06	2.07734e+06	5.42353e+06	2.07866e+06	1.43853e+06	1.97995e+06	5.13435e+08	2.68121e+06	2.75636e+06	2.86851e+06	1.88246e+06	4.48554e+06	2.19264e+06	2.26442e+06	6.90953e+06	2.42344e+06
445	197.089	197.001	197.09	429.621	425.447	458.092	165	34	36	34	9	36	15	9.30875e+06	9.90434e+06	9.79601e+06	9.27867e+06	1.17782e+07	1.45566e+07	1.01747e+07	6.4342e+06	3.95005e+06	8.63829e+06	9.47808e+06	1.0222e+07	6.17959e+06	6.01115e+06	7.92616e+06	7.83794e+06	8.92993e+06	9.4842e+06	1.93074e+07	1.93083e+07	1.96752e+07	1.52791e+07	2.20415e+07	1.59724e+07	1.83937e+06	1.28943e+07	1.27626e+07	2.01949e+07	2.25851e+07	2.38175e+07	1.27069e+07	2.03421e+07	1.6025e+07	1.48886e+07	1.7115e+07	1.79315e+07
446	197.07	197	197.072	268.563	246.067	302.068	158	33	33	31	9	33	14	5.48571e+06	5.8235e+06	5.78247e+06	5.55417e+06	6.2917e+06	6.39375e+06	845943	5.85368e+06	5.26638e+06	5.55237e+06	5.63712e+06	5.51472e+06	1.45509e+06	5.51471e+06	5.65691e+06	1.52101e+06	5.74441e+06	6.06987e+06	5.91123e+06	5.89062e+06	6.24844e+06	5.52407e+06	5.78712e+06	6.05158e+06	4.19232e+06	5.83352e+06	6.03262e+06	6.20156e+06	6.38968e+06	6.68011e+06	5.55287e+06	5.74835e+06	5.87345e+06	9.078e+06	9.96935e+06	9.9861e+06
447	197.103	197.099	197.103	186.048	184.088	191.589	49	15	18	0	0	16	0	9.76388e+06	9.90303e+06	9.93002e+06	9.848e+06	1.13067e+07	1.27016e+07	1.9223e+06	6.68563e+06	5.25757e+06	9.9963e+06	1.04942e+07	1.08921e+07	7.21537e+06	7.17834e+06	8.23822e+06	7.27225e+06	8.70626e+06	8.57016e+06	7.88809e+06	7.61982e+06	7.70114e+06	5.37042e+06	5.379e+06	5.43721e+06	3.35998e+06	4.81441e+06	4.82739e+06	6.04658e+06	6.40056e+06	6.51226e+06	4.37562e+06	4.88789e+06	5.05795e+06	4.89385e+06	5.33131e+06	5.47663e+06
448	197.1	197.028	197.101	523.638	517.289	531.05	169	36	36	36	9	36	16	1.04292e+08	1.02677e+08	1.01903e+08	1.03841e+08	1.08271e+08	1.13699e+08	3.54411e+07	8.65134e+07	7.58525e+07	9.8576e+07	1.00588e+08	1.02203e+08	7.92044e+07	8.37958e+07	9.07424e+07	8.63108e+07	9.58201e+07	9.67583e+07	9.94769e+07	1.00802e+08	9.86878e+07	9.26784e+07	1.68e+08	9.30248e+07	5.47844e+07	8.59916e+07	8.74479e+07	1.01622e+08	1.04258e+08	1.06728e+08	9.7455e+07	9.13552e+07	9.19785e+07	1.01057e+08	9.45921e+07	9.61713e+07
449	197.154	197.11	197.161	70.1526	66.4404	101.59	152	29	36	23	9	36	16	396182	405640	401373	417203	484036	554078	280035	452313	421064	607495	587125	627930	131254	162669	304157	568481	518101	564672	669835	608332	638694	734949	718475	671324	360929	507517	510403	599300	579474	602965	310323	222183	204811	318452	367448	334136
450	198.011	198.01	198.011	194.904	191.905	200.362	113	29	26	20	6	20	12	2.11003e+06	2.4898e+06	2.46804e+06	2.21134e+06	2.66384e+06	2.57581e+06	1.61701e+06	2.72456e+06	6.42136e+06	2.25002e+06	2.40514e+06	2.91538e+06	1.64776e+06	2.82223e+06	2.84482e+06	1.58475e+06	2.72647e+06	3.13836e+06	2.68354e+06	3.25317e+06	3.07981e+06	2.51196e+06	3.025e+06	3.15239e+06	1.89141e+06	2.71514e+06	2.83654e+06	2.45822e+06	2.60123e+06	3.03994e+06	2.21572e+06	2.70321e+06	2.97722e+06	2.127e+06	3.01005e+06	2.87708e+06
451	198.097	198.004	198.097	375.024	350.175	395.841	41	10	14	3	9	5	0	1.00156e+07	9.46845e+06	9.66419e+06	9.5721e+06	1.06624e+07	1.15832e+07	4.49482e+06	1.01587e+07	8.64529e+06	7.9185e+06	7.82665e+06	7.44017e+06	1.05153e+07	9.27912e+06	1.06357e+07	1.24955e+07	1.31725e+07	1.3147e+07	1.48408e+07	1.47995e+07	1.45831e+07	1.45176e+07	1.42296e+07	1.36784e+07	5.59352e+06	1.28845e+07	2.50462e+07	1.37498e+07	1.45799e+07	1.46332e+07	1.32961e+07	1.35877e+07	1.36739e+07	1.24705e+07	1.33398e+07	1.34516e+07
452	198.087	198.086	198.087	299.284	282.063	301.777	167	36	36	34	9	36	16	3.54853e+08	3.64544e+08	3.73849e+08	3.60782e+08	3.88567e+08	3.74503e+08	5.73213e+07	2.98665e+08	2.22544e+08	3.5795e+08	3.67751e+08	3.86054e+08	2.88529e+08	3.04025e+08	3.32787e+08	3.39152e+08	3.68106e+08	3.83048e+08	5.04834e+08	5.18892e+08	5.24963e+08	4.92076e+08	5.01918e+08	5.00428e+08	1.44807e+08	4.61673e+08	4.28077e+08	5.03475e+08	5.44667e+08	5.7994e+08	4.66403e+08	4.85801e+08	4.96388e+08	5.00331e+08	5.34774e+08	5.33547e+08
453	198.185	198.159	198.191	67.7764	63.2822	72.2386	87	30	4	24	9	7	13	616765	650624	631809	1.40579e+06	1.44393e+06	1.54685e+06	393926	822563	757317	931419	860701	847550	1.00621e+06	853462	912089	927136	856191	892269	4.43298e+06	4.32436e+06	4.02146e+06	1.27387e+06	1.25882e+06	1.2056e+06	515058	920890	929702	841849	876121	889443	402225	353567	389834	2.06496e+06	2.0237e+06	1.82901e+06
454	198.862	198.862	198.862	189.641	187.291	194.612	72	30	0	27	8	0	7	1.42823e+06	1.5858e+06	1.53709e+06	1.56423e+06	1.55033e+06	1.49173e+06	1.41201e+06	1.60163e+06	1.81392e+06	1.53658e+06	1.60539e+06	1.62247e+06	1.05538e+06	1.72248e+06	1.70956e+06	1.02992e+06	1.56712e+06	1.60779e+06	1.58701e+06	1.46583e+06	1.61739e+06	1.52949e+06	1.61466e+06	1.60248e+06	1.4229e+06	1.58534e+06	1.69255e+06	1.5538e+06	1.73745e+06	1.60228e+06	1.4948e+06	1.65412e+06	1.73373e+06	1.54958e+06	1.69796e+06	1.73837e+06
455	199.039	199.037	199.039	654.664	652.408	658.915	165	35	35	34	9	36	16	1.35265e+08	1.35856e+08	1.34247e+08	1.36779e+08	1.39147e+08	1.40311e+08	1.74291e+08	1.20883e+08	1.19159e+08	1.40594e+08	1.41461e+08	1.40622e+08	1.74743e+08	1.32838e+08	1.32357e+08	1.66778e+08	1.3262e+08	1.3076e+08	1.48541e+08	1.46457e+08	1.47246e+08	1.45241e+08	1.43857e+08	1.4349e+08	1.23013e+08	1.43428e+08	1.41308e+08	1.54419e+08	1.57005e+08	1.54298e+08	1.42415e+08	1.48573e+08	1.42201e+08	1.49779e+08	1.51768e+08	1.51773e+08
456	199.088	199.031	199.118	299.167	282.601	301.777	167	36	36	34	9	36	16	3.13424e+07	3.18183e+07	3.31821e+07	3.21068e+07	3.41504e+07	3.30735e+07	6.22267e+06	2.6389e+07	1.93661e+07	3.14479e+07	3.24653e+07	3.40609e+07	2.46153e+07	2.65137e+07	2.89787e+07	2.86916e+07	3.50942e+07	3.34967e+07	4.49537e+07	4.69872e+07	4.68148e+07	4.37543e+07	4.47443e+07	4.38115e+07	1.3467e+07	4.08839e+07	5.52296e+07	4.50677e+07	4.82975e+07	5.15591e+07	4.13351e+07	4.21615e+07	4.51198e+07	4.40507e+07	4.77612e+07	4.75052e+07
457	200.023	200.023	200.023	654.59	652.25	658.915	166	35	36	34	9	36	16	8.69126e+07	8.58733e+07	8.64448e+07	8.64098e+07	8.90481e+07	8.9789e+07	1.07621e+08	7.73203e+07	7.66131e+07	8.92727e+07	8.9582e+07	8.97395e+07	1.04893e+08	8.52716e+07	8.54763e+07	9.97171e+07	8.37704e+07	8.36977e+07	9.48082e+07	9.45992e+07	9.38238e+07	9.24961e+07	9.13494e+07	9.02893e+07	7.77189e+07	9.05667e+07	8.98725e+07	9.81607e+07	9.89455e+07	9.74161e+07	8.92934e+07	9.30173e+07	9.16843e+07	9.33899e+07	9.59625e+07	9.69457e+07
458	200.074	200.071	200.08	423.478	422.534	424.494	166	35	36	34	9	36	16	4.44876e+06	4.77898e+06	5.10541e+06	4.63112e+06	5.32439e+06	5.95558e+06	1.32782e+06	4.23885e+06	3.6345e+06	4.18743e+06	4.55692e+06	4.93676e+06	4.93157e+06	4.05367e+06	4.99418e+06	5.36379e+06	5.11119e+06	5.48476e+06	9.45119e+06	9.53257e+06	9.61579e+06	7.92382e+06	8.47732e+06	8.83117e+06	3.21104e+06	7.63815e+06	7.9234e+06	9.68721e+06	9.80298e+06	1.01967e+07	7.98835e+06	8.47619e+06	8.72443e+06	8.3452e+06	8.94463e+06	9.52121e+06
459	200.126	200.118	200.129	138.487	135.351	156.326	157	34	33	34	8	33	15	4.71083e+06	3.95248e+06	3.43866e+06	4.71893e+06	4.21222e+06	3.92793e+06	1.24141e+06	3.74077e+06	2.63307e+06	4.74785e+06	4.21955e+06	3.88509e+06	5.39672e+06	4.01205e+06	3.80637e+06	5.22324e+06	4.29991e+06	3.57996e+06	4.33043e+06	3.63962e+06	3.0138e+06	4.20059e+06	3.40619e+06	2.94274e+06	2.87151e+06	3.79529e+06	3.17357e+06	4.14656e+06	3.7279e+06	3.0909e+06	4.53959e+06	3.82158e+06	3.24483e+06	4.6919e+06	3.81171e+06	3.21851e+06
460	200.095	200.093	200.099	298.071	280.177	301.187	129	22	24	27	8	33	15	2.39313e+06	2.49743e+06	2.5573e+06	2.3429e+06	2.51546e+06	2.44616e+06	673287	2.19614e+06	1.68441e+06	2.46213e+06	2.65107e+06	2.62549e+06	993045	2.11111e+06	2.2825e+06	2.73819e+06	2.43445e+06	2.4001e+06	2.93816e+06	3.02466e+06	3.18082e+06	2.79918e+06	2.71433e+06	2.84604e+06	1.39114e+06	2.85492e+06	2.55977e+06	3.14642e+06	3.09475e+06	3.40866e+06	2.75808e+06	2.80054e+06	2.89475e+06	2.97429e+06	3.23758e+06	3.22548e+06
461	200.047	200.044	200.164	374.275	362.237	378.198	167	36	36	34	9	36	16	1.96027e+07	2.76728e+07	4.11784e+07	2.14343e+07	2.03624e+07	1.90489e+07	7.60669e+07	5.73073e+07	7.4047e+07	1.53515e+07	2.04467e+07	2.12171e+07	1.79184e+08	6.73705e+07	7.75525e+07	1.25894e+08	4.44491e+07	6.00543e+07	5.26572e+07	7.40906e+07	9.18407e+07	7.39863e+07	9.11882e+07	1.11069e+08	6.48801e+07	1.04587e+08	1.22325e+08	2.9209e+07	3.18773e+07	3.03285e+07	7.82785e+07	9.02357e+07	1.07141e+08	4.13321e+07	5.10515e+07	7.10157e+07
462	200.164	200.144	200.185	74.7057	69.0132	76.8048	116	36	17	34	9	20	0	2.62857e+06	2.43614e+06	2.35286e+06	1.00714e+07	1.0463e+07	1.16912e+07	1.74485e+06	2.43045e+06	2.08193e+06	5.48405e+06	5.23673e+06	5.31667e+06	6.35809e+06	5.65421e+06	5.99652e+06	4.81922e+06	4.99607e+06	4.87553e+06	1.21032e+07	1.17149e+07	1.17657e+07	6.83522e+06	6.71666e+06	6.67164e+06	3.01586e+06	4.90903e+06	4.66362e+06	1.87787e+06	1.83847e+06	1.7429e+06	5.01593e+06	4.67656e+06	4.60713e+06	2.43102e+06	2.31003e+06	2.35644e+06
463	201.062	200.997	201.076	370.369	352.384	396.124	68	21	21	4	9	8	4	4.52382e+06	4.20064e+06	4.4096e+06	4.38236e+06	4.21266e+06	4.64197e+06	5.35042e+06	4.89536e+06	5.00512e+06	3.69767e+06	3.88484e+06	3.80694e+06	1.4082e+07	4.21768e+06	5.45892e+06	1.27313e+07	5.41373e+06	5.77829e+06	5.93496e+06	6.08732e+06	6.40584e+06	6.57394e+06	6.81788e+06	7.2559e+06	4.82372e+06	7.4419e+06	1.93483e+07	5.29145e+06	4.87547e+06	5.32536e+06	7.09673e+06	7.03569e+06	7.03458e+06	6.14657e+06	4.9553e+06	6.20808e+06
464	201.073	201.03	201.075	632.62	628.826	636.66	94	18	18	25	1	22	10	9.56914e+06	8.84777e+06	8.71542e+06	9.66488e+06	9.98374e+06	1.08233e+07	6.19145e+06	6.73314e+06	6.25786e+06	9.77067e+06	9.44373e+06	9.55768e+06	1.06071e+07	7.70394e+06	8.0479e+06	1.1089e+07	8.77383e+06	8.54803e+06	1.17844e+07	1.11186e+07	1.09969e+07	1.08701e+07	1.00661e+07	9.74489e+06	6.57031e+06	9.3725e+06	9.12975e+06	1.27446e+07	1.23502e+07	1.25289e+07	1.11688e+07	1.04694e+07	1.03794e+07	1.23534e+07	1.14766e+07	1.10121e+07
465	201.168	201.165	201.173	75.1927	73.6347	76.012	34	12	0	22	0	0	0	328578	264623	278068	997445	1.04125e+06	1.1819e+06	76978	315878	332189	463889	521354	472415	539892	481400	519877	416120	467959	461289	1.14334e+06	1.12319e+06	1.17506e+06	620771	604306	597772	383534	427946	475699	191651	260215	206851	371591	394865	336748	216089	220879	243856
466	202.014	202.005	202.019	433.861	431.877	436.038	167	36	36	34	9	36	16	3.42128e+06	3.53992e+06	3.70476e+06	3.47792e+06	3.78538e+06	4.08164e+06	1.87039e+06	3.42091e+06	3.25805e+06	3.49596e+06	3.62159e+06	3.69093e+06	2.99892e+06	3.2527e+06	3.68731e+06	3.30279e+06	3.70919e+06	3.85551e+06	2.93475e+06	3.72666e+06	3.72973e+06	3.59511e+06	3.66396e+06	3.79077e+06	1.99826e+06	3.31681e+06	3.49193e+06	3.7907e+06	4.10299e+06	4.11639e+06	2.67928e+06	3.49168e+06	3.67004e+06	2.93636e+06	3.08012e+06	3.86181e+06
467	202.056	202.056	202.056	633.521	630.138	637.684	167	36	36	34	9	36	16	1.88023e+07	1.88702e+07	1.83113e+07	1.98334e+07	2.05637e+07	2.19756e+07	8.56083e+06	1.37534e+07	1.15538e+07	1.95885e+07	1.97469e+07	2.01049e+07	1.97164e+07	1.59033e+07	1.73688e+07	2.07143e+07	1.80791e+07	1.80663e+07	2.30045e+07	2.27021e+07	2.22602e+07	2.07873e+07	2.09608e+07	2.0615e+07	1.10044e+07	1.92492e+07	1.91354e+07	2.49397e+07	2.50684e+07	2.55364e+07	2.17334e+07	2.09349e+07	2.12606e+07	2.3566e+07	2.29301e+07	2.27759e+07
468	202.107	202.107	202.111	300.261	287.142	302.662	166	35	36	34	9	36	16	1.04954e+07	1.08695e+07	1.10216e+07	1.05183e+07	1.13976e+07	1.03921e+07	1.23625e+06	9.17023e+06	7.22263e+06	1.04731e+07	1.11623e+07	1.14914e+07	1.13312e+07	9.2313e+06	9.78404e+06	1.2966e+07	1.08444e+07	1.14526e+07	9.8158e+06	1.07398e+07	1.0376e+07	9.45696e+06	9.89967e+06	1.00603e+07	5.37835e+06	9.21862e+06	8.88542e+06	1.04918e+07	1.13344e+07	1.16575e+07	9.17427e+06	9.27226e+06	1.01079e+07	9.73334e+06	1.08181e+07	1.04022e+07
469	201.998	201.942	202.088	381.017	370.091	386.633	141	29	31	30	9	27	15	695595	4.38164e+06	4.7722e+06	683568	1.06822e+06	1.83376e+06	3.96103e+06	2.11911e+06	3.18828e+06	611944	500388	494035	8.63049e+06	2.21637e+06	2.51438e+06	7.6922e+06	1.97216e+06	2.35401e+06	1.92751e+06	2.33671e+06	2.42154e+06	2.23764e+06	2.55004e+06	3.02461e+06	1.87149e+06	3.04429e+06	4.07662e+06	1.71147e+06	1.87322e+06	1.75429e+06	2.57162e+06	2.88313e+06	3.18347e+06	2.20867e+06	2.25449e+06	2.49849e+06
470	202.093	202.09	202.107	124.323	92.1744	127.393	140	32	31	25	9	26	16	7.83982e+06	5.76449e+06	5.83254e+06	8.40625e+06	6.38289e+06	6.71758e+06	4.39288e+06	6.49999e+06	4.816e+06	9.01728e+06	8.29021e+06	6.61468e+06	1.10035e+07	7.29271e+06	5.54572e+06	1.33965e+07	8.08072e+06	6.10272e+06	1.08937e+07	1.07029e+07	1.09696e+07	1.03022e+07	1.04026e+07	1.04144e+07	5.37899e+06	9.04221e+06	9.17325e+06	1.12611e+07	1.16364e+07	1.18779e+07	9.73045e+06	9.91687e+06	1.00083e+07	1.07218e+07	1.08748e+07	1.09848e+07
471	202.18	202.177	202.18	246.501	244.922	271.046	168	36	36	35	9	36	16	1.38338e+08	1.32761e+08	1.31478e+08	1.62559e+08	1.78843e+08	1.92634e+08	3.63057e+07	1.17169e+08	9.17679e+07	1.96828e+08	2.00867e+08	2.06523e+08	1.813e+08	1.77075e+08	1.97302e+08	1.08582e+08	1.1939e+08	1.20874e+08	8.33492e+07	8.12234e+07	8.17991e+07	8.7521e+07	8.79375e+07	8.63397e+07	3.01042e+07	7.0509e+07	6.92384e+07	1.52168e+08	1.5448e+08	1.59967e+08	6.61473e+07	6.55371e+07	6.49605e+07	1.64467e+08	1.62775e+08	1.64552e+08
472	202.18	202.168	202.216	165.991	164.355	196.331	159	36	28	34	9	35	16	2.71012e+07	2.6621e+07	2.67236e+07	5.75588e+07	6.31329e+07	7.20689e+07	6.64207e+06	1.62106e+07	1.35506e+07	2.3755e+07	2.46175e+07	2.59873e+07	1.85759e+07	1.60349e+07	1.84175e+07	1.01905e+07	9.58013e+06	9.75473e+06	1.72349e+07	1.72447e+07	1.70239e+07	1.42478e+07	1.44716e+07	1.43984e+07	7.34071e+06	1.41684e+07	1.388e+07	2.23903e+07	2.40842e+07	2.58019e+07	1.08498e+07	1.09062e+07	1.13605e+07	3.8163e+07	3.77546e+07	3.82123e+07
473	203.007	203.006	203.01	633.654	631.812	637.943	149	32	33	28	9	33	14	1.18813e+07	1.42547e+07	1.49855e+07	1.26405e+07	1.5777e+07	1.70473e+07	3.44846e+06	1.0735e+07	1.00462e+07	1.23901e+07	1.50181e+07	1.58629e+07	3.75615e+06	1.22239e+07	1.40313e+07	3.58344e+06	1.36881e+07	1.45178e+07	1.58243e+07	1.70049e+07	1.71518e+07	1.47292e+07	1.61146e+07	1.63446e+07	2.91512e+06	1.47584e+07	1.5232e+07	1.64195e+07	1.79079e+07	1.94746e+07	5.18971e+06	1.61662e+07	1.64498e+07	6.27749e+06	1.68018e+07	1.77253e+07
474	203.15	203.149	203.15	496.078	494.646	500.347	169	36	36	36	9	36	16	1.66256e+08	1.5352e+08	1.46242e+08	1.57597e+08	1.64783e+08	1.73223e+08	2.3818e+07	9.72224e+07	7.25878e+07	1.58966e+08	1.54171e+08	1.5098e+08	6.32181e+07	9.6081e+07	1.0231e+08	6.71203e+07	1.10576e+08	1.02797e+08	1.10283e+08	9.99854e+07	9.49588e+07	9.3496e+07	8.11945e+07	8.15789e+07	3.05222e+07	8.01909e+07	7.31014e+07	1.22317e+08	1.18961e+08	1.15823e+08	8.15635e+07	8.593e+07	8.31157e+07	1.04394e+08	1.06238e+08	1.00074e+08
475	203.053	203.052	203.054	372.702	371.14	374.608	168	36	36	35	9	36	16	3.10253e+08	3.44919e+08	3.8726e+08	3.24693e+08	3.25828e+08	3.02282e+08	2.26142e+08	4.30588e+08	4.46976e+08	2.97377e+08	3.23719e+08	3.31605e+08	3.21591e+08	4.37648e+08	4.58469e+08	2.85338e+08	3.87368e+08	4.18414e+08	4.43679e+08	4.91298e+08	5.0673e+08	4.32345e+08	4.94529e+08	4.86908e+08	3.46584e+08	4.78345e+08	4.78026e+08	3.63249e+08	3.8294e+08	3.71929e+08	4.24967e+08	4.78766e+08	5.06075e+08	3.81103e+08	4.19294e+08	4.63771e+08
476	203.081	203.081	203.082	97.7709	94.8504	100.585	154	36	33	34	9	27	15	2.83694e+07	2.56245e+07	2.32804e+07	2.13654e+07	1.92199e+07	1.77252e+07	1.28933e+07	2.5382e+07	2.17768e+07	2.02704e+07	1.88093e+07	1.74201e+07	3.71394e+07	2.49387e+07	2.48179e+07	3.73722e+07	2.59037e+07	2.50462e+07	3.26696e+07	3.07868e+07	2.9701e+07	2.67842e+07	2.45316e+07	2.43014e+07	1.81767e+07	2.92013e+07	2.74492e+07	2.52773e+07	2.41325e+07	2.30713e+07	3.73656e+07	3.28891e+07	2.99366e+07	3.22505e+07	2.82609e+07	2.58231e+07
477	203.183	203.178	203.184	246.463	245.006	256.519	132	32	27	25	9	23	16	1.58893e+07	1.53226e+07	1.53441e+07	1.9233e+07	2.06076e+07	2.21375e+07	1.60143e+06	1.32155e+07	1.02307e+07	2.2962e+07	2.35452e+07	2.4252e+07	2.15225e+07	2.06905e+07	2.29296e+07	1.30729e+07	1.38102e+07	1.43004e+07	9.39886e+06	9.24585e+06	9.1225e+06	9.83909e+06	1.00044e+07	9.77042e+06	4.02562e+06	8.01605e+06	7.71723e+06	1.77641e+07	1.77982e+07	1.86133e+07	8.08112e+06	7.70242e+06	7.35084e+06	1.91304e+07	1.91731e+07	1.91116e+07
478	204.089	204.076	204.123	377.416	374.776	379.683	169	36	36	36	9	36	16	4.32058e+07	4.99742e+07	5.6153e+07	4.31749e+07	4.05465e+07	3.49901e+07	3.29837e+07	5.05293e+07	5.30305e+07	4.194e+07	4.48365e+07	4.5369e+07	5.29253e+07	5.81101e+07	5.74957e+07	3.73474e+07	4.36377e+07	4.49129e+07	4.55994e+07	5.06436e+07	5.33014e+07	5.53473e+07	6.17135e+07	6.21842e+07	4.88884e+07	6.763e+07	6.34825e+07	3.76034e+07	3.86861e+07	3.58588e+07	5.20245e+07	6.01216e+07	6.12134e+07	4.22712e+07	4.79955e+07	5.12314e+07
479	204.134	204.01	204.134	427.435	424.956	448.764	115	22	29	17	8	24	15	5.25844e+06	4.44845e+06	3.8161e+06	5.50775e+06	4.8354e+06	5.1003e+06	408175	3.65332e+06	2.41232e+06	5.02607e+06	4.4364e+06	4.22687e+06	4.10013e+06	3.51089e+06	577023	4.81175e+06	4.25884e+06	631979	4.66748e+06	773413	741863	688374	729308	743478	1.30133e+06	538935	553951	5.27347e+06	756562	4.34871e+06	4.26946e+06	3.6573e+06	3.36709e+06	5.15368e+06	666974	652415
480	204.088	204.045	204.09	97.1971	68.6452	98.0427	26	7	3	6	9	0	1	3.49706e+06	3.29506e+06	3.07282e+06	2.86853e+06	2.49164e+06	2.47032e+06	2.23109e+06	3.33921e+06	3.01865e+06	2.7859e+06	2.70801e+06	2.46932e+06	4.59092e+06	3.1665e+06	3.26161e+06	4.62068e+06	3.33625e+06	3.19365e+06	3.88894e+06	3.86836e+06	3.65224e+06	3.1616e+06	2.99893e+06	3.31592e+06	2.61729e+06	3.57939e+06	3.40497e+06	3.24306e+06	3.08317e+06	2.83082e+06	4.56677e+06	3.98073e+06	3.8372e+06	3.95817e+06	3.46417e+06	3.30491e+06
481	204.152	204.147	204.154	495.853	494.332	500.347	167	36	36	34	9	36	16	1.39156e+07	1.29541e+07	1.23149e+07	1.34182e+07	1.39219e+07	1.45765e+07	1.92693e+06	8.44219e+06	6.35733e+06	1.35331e+07	1.30518e+07	1.27264e+07	5.2347e+06	8.32979e+06	8.81294e+06	5.51615e+06	9.48525e+06	8.86248e+06	9.54475e+06	8.82509e+06	8.12181e+06	8.11455e+06	7.15587e+06	7.13425e+06	2.44104e+06	7.07583e+06	6.43801e+06	1.06834e+07	1.0242e+07	9.93369e+06	7.34341e+06	7.61737e+06	7.43221e+06	9.08165e+06	9.31089e+06	8.68126e+06
482	205.166	205.164	205.176	419.358	417.578	420.482	165	34	36	34	9	36	16	699963	641760	718306	605278	754211	888394	96224.6	571911	390673	708167	618561	765216	1.01445e+06	513229	648142	1.29896e+06	688266	761373	2.23139e+06	2.09706e+06	2.40556e+06	1.94925e+06	2.08274e+06	2.03359e+06	395160	1.6383e+06	1.68575e+06	2.23749e+06	2.59067e+06	2.54328e+06	1.62934e+06	1.76631e+06	1.81184e+06	1.65729e+06	1.8092e+06	2.13583e+06
483	205.155	205.155	205.156	509.209	507.857	514.542	165	34	36	34	9	36	16	3.39961e+06	3.07606e+06	3.08515e+06	3.29433e+06	3.50336e+06	4.2017e+06	307868	1.45634e+06	987701	3.18317e+06	3.00077e+06	3.40062e+06	1.14729e+06	1.42631e+06	1.66762e+06	1.34691e+06	1.91272e+06	1.72651e+06	2.19202e+06	1.94126e+06	1.95454e+06	1.68577e+06	1.53763e+06	1.50283e+06	485027	1.39495e+06	1.31659e+06	2.32673e+06	2.25768e+06	2.32088e+06	1.6168e+06	1.67981e+06	1.57334e+06	2.04144e+06	1.99445e+06	1.90563e+06
484	205.085	205.069	205.097	344.347	343.87	369.882	167	36	36	34	9	36	16	4.78283e+08	4.90189e+08	5.02543e+08	4.04989e+08	4.57497e+08	5.08908e+08	8.62988e+07	3.84662e+08	3.042e+08	3.93832e+08	4.18466e+08	4.455e+08	4.49522e+08	3.80768e+08	4.54927e+08	5.1716e+08	4.71593e+08	4.88822e+08	5.25332e+08	5.37348e+08	5.47325e+08	4.34136e+08	4.47858e+08	4.46583e+08	1.25857e+08	4.35947e+08	4.04701e+08	4.74959e+08	4.95397e+08	5.17297e+08	4.6492e+08	5.00245e+08	5.05335e+08	4.63463e+08	4.93659e+08	5.13933e+08
485	206.077	206.077	206.077	633.175	629.867	637.416	167	36	36	34	9	36	16	4.98414e+07	4.53041e+07	4.58211e+07	5.24338e+07	5.09228e+07	5.59802e+07	2.46528e+07	3.37107e+07	2.77091e+07	5.21361e+07	4.85229e+07	5.03358e+07	5.63398e+07	3.92117e+07	4.21339e+07	5.9714e+07	4.48482e+07	4.3653e+07	6.05383e+07	5.59647e+07	5.71015e+07	5.50748e+07	5.20013e+07	5.11614e+07	2.82373e+07	4.77077e+07	4.66841e+07	6.45703e+07	6.33736e+07	6.51234e+07	5.73573e+07	5.24466e+07	5.18247e+07	6.20874e+07	5.76758e+07	5.74486e+07
486	205.962	205.962	206.093	383.229	363.441	384.701	150	31	36	31	3	33	16	2.55038e+08	1.44612e+08	8.65257e+07	2.53547e+08	2.62403e+08	3.4673e+08	2.38964e+06	9.96135e+07	1.60691e+07	2.00624e+08	1.3388e+08	1.13495e+08	1.24749e+07	4.09767e+07	5.23045e+07	3.64278e+07	2.07117e+08	1.5927e+08	3.51071e+08	2.47267e+08	1.75012e+08	2.05496e+08	1.23402e+08	7.61823e+07	1.44621e+07	6.73147e+07	3.42442e+07	4.12825e+08	3.55502e+08	3.58695e+08	2.45617e+08	1.47125e+08	1.09074e+08	3.44855e+08	2.4318e+08	1.77555e+08
487	206.102	206.061	206.104	344.105	340.061	362.589	137	34	31	27	9	22	14	3.75005e+07	3.60249e+07	3.48836e+07	2.91374e+07	3.3833e+07	3.92905e+07	7.86758e+06	2.35191e+07	2.71422e+07	2.60187e+07	2.36471e+07	2.58385e+07	5.08012e+07	2.3486e+07	3.11319e+07	4.58699e+07	3.69931e+07	3.68251e+07	4.25762e+07	3.98192e+07	3.96725e+07	3.10634e+07	4.17107e+07	2.68179e+07	6.82587e+06	3.97062e+07	3.73372e+07	3.72925e+07	3.70616e+07	3.9499e+07	3.57023e+07	3.65647e+07	3.49101e+07	3.53063e+07	3.66853e+07	3.61526e+07
488	206.153	206.152	206.164	512.196	510.022	513.35	159	32	34	34	8	36	15	367117	290788	370401	348170	347939	467682	23519.5	245459	169664	329079	313751	301570	217312	208233	273019	253466	365462	342863	354326	251228	282870	253805	291257	255445	56931.7	236002	187806	375354	325197	352318	245425	235860	273327	292959	317594	306781
489	206.974	206.904	206.999	383.144	379.041	386.033	165	35	36	34	9	36	15	1.45631e+07	8.58665e+06	5.16414e+06	1.463e+07	1.4819e+07	1.89047e+07	1.62972e+06	6.15471e+06	1.15735e+06	1.1481e+07	7.92061e+06	6.57337e+06	1.25158e+06	2.36224e+06	2.92814e+06	2.40772e+06	1.20315e+07	9.12643e+06	1.99069e+07	1.39108e+07	1.0024e+07	1.17027e+07	7.40335e+06	4.42091e+06	600747	4.45798e+06	2.05486e+06	2.28651e+07	2.01894e+07	1.95248e+07	1.41134e+07	8.65806e+06	6.3942e+06	1.96418e+07	1.35586e+07	1.02456e+07
490	207.02	207.012	207.037	445.016	442.492	447.267	167	36	36	34	9	36	16	5.91589e+06	5.95257e+06	6.15004e+06	6.14068e+06	6.56902e+06	6.59074e+06	2.54844e+06	5.4165e+06	4.88115e+06	5.69265e+06	5.95347e+06	6.01766e+06	6.44362e+06	5.43641e+06	5.53467e+06	6.63301e+06	6.14962e+06	5.7999e+06	6.46744e+06	6.08886e+06	6.22062e+06	5.90663e+06	6.14464e+06	6.21916e+06	3.27069e+06	5.4213e+06	5.34301e+06	6.28943e+06	6.39123e+06	6.62063e+06	5.97489e+06	5.93885e+06	6.07546e+06	6.22839e+06	6.28804e+06	6.3089e+06
491	207.115	207.109	207.116	340.161	338.979	346.374	165	34	36	34	9	36	16	7.82646e+06	7.60379e+06	8.02303e+06	8.14103e+06	8.65162e+06	9.19787e+06	4.08098e+06	7.24847e+06	6.50374e+06	7.76421e+06	7.85649e+06	7.63759e+06	7.87145e+06	7.32857e+06	7.71624e+06	8.85313e+06	8.43086e+06	8.24024e+06	8.52787e+06	8.25458e+06	8.67873e+06	8.3118e+06	8.1721e+06	8.26446e+06	4.76087e+06	7.7644e+06	7.31865e+06	8.37335e+06	8.54489e+06	9.13322e+06	7.5623e+06	7.86392e+06	7.76549e+06	7.9076e+06	8.06333e+06	8.22424e+06
492	207.968	207.961	208.05	383.409	380.944	385.25	167	36	36	34	9	36	16	3.78084e+07	2.19303e+07	1.42501e+07	3.74799e+07	3.88773e+07	5.08682e+07	1.81841e+06	1.58587e+07	4.82457e+06	3.0207e+07	2.08711e+07	1.81503e+07	7.45913e+06	7.88618e+06	9.45667e+06	1.05112e+07	3.13322e+07	2.49215e+07	5.22167e+07	3.74571e+07	2.733e+07	3.12758e+07	1.97257e+07	1.32396e+07	3.21061e+06	1.14328e+07	7.67403e+06	6.0673e+07	5.22493e+07	5.30776e+07	3.60194e+07	2.32235e+07	1.76727e+07	5.1201e+07	3.63373e+07	2.72959e+07
493	208.075	208.075	208.075	633.281	629.867	637.416	164	34	36	34	9	35	16	6.94578e+06	6.41312e+06	6.49603e+06	7.24116e+06	7.05147e+06	7.96166e+06	3.28999e+06	4.73181e+06	3.35447e+06	7.52651e+06	6.7332e+06	7.17895e+06	7.84349e+06	5.35908e+06	5.8283e+06	8.08536e+06	6.30966e+06	6.03375e+06	8.28778e+06	7.74145e+06	8.04432e+06	7.61003e+06	7.17108e+06	7.21931e+06	3.97068e+06	6.60985e+06	6.65904e+06	9.02073e+06	8.82848e+06	9.17655e+06	8.05065e+06	7.29348e+06	7.40925e+06	8.7013e+06	8.05359e+06	7.99699e+06
494	208.166	208.098	208.181	66.8293	62.1888	100.271	39	17	0	12	7	3	0	1.02147e+06	999870	1.01949e+06	1.88781e+06	1.84923e+06	1.92142e+06	930907	1.13622e+06	1.08984e+06	1.25454e+06	1.20424e+06	1.25932e+06	1.17168e+06	1.05074e+06	1.05218e+06	979671	877114	882019	5.4756e+06	5.5887e+06	5.48502e+06	1.35163e+06	1.35864e+06	1.32371e+06	822741	991851	1.03081e+06	1.30269e+06	1.27817e+06	1.26702e+06	636638	597630	520100	3.54102e+06	3.45614e+06	2.50413e+06
495	209.103	209.103	209.103	262.859	261.555	263.602	31	13	18	0	0	0	0	4.77727e+06	5.94569e+06	6.54917e+06	5.00836e+06	6.98497e+06	8.42001e+06	2.83384e+06	5.71404e+06	5.57927e+06	4.08052e+06	5.32427e+06	6.44987e+06	4.54817e+06	5.45475e+06	6.92765e+06	4.87269e+06	6.46875e+06	7.60386e+06	7.57608e+06	8.47702e+06	9.47458e+06	6.8151e+06	7.8378e+06	8.67297e+06	4.06185e+06	7.56467e+06	8.00872e+06	7.19966e+06	8.53334e+06	1.00858e+07	7.00504e+06	7.93246e+06	8.98957e+06	7.45984e+06	8.8656e+06	9.54074e+06
496	209.092	209.047	209.1	350.705	349.951	374.655	167	36	36	34	9	36	16	6.52346e+07	6.21716e+07	5.89262e+07	1.50308e+08	1.68905e+08	1.87295e+08	1.55156e+07	7.66717e+07	5.21806e+07	9.33543e+07	9.37328e+07	9.40955e+07	9.60165e+07	8.79513e+07	1.05749e+08	1.25264e+08	1.35198e+08	1.31759e+08	4.33834e+07	4.04109e+07	3.94926e+07	1.27424e+08	1.23584e+08	1.15634e+08	2.40591e+07	8.34474e+07	7.21334e+07	1.13122e+08	1.14286e+08	1.179e+08	5.43037e+07	5.23868e+07	5.08475e+07	1.17089e+08	1.1827e+08	1.14641e+08
497	209.14	209.129	209.154	80.4127	64.7104	89.0657	99	36	15	33	9	6	0	6.00404e+06	5.76701e+06	5.7642e+06	1.11913e+07	1.18575e+07	1.28064e+07	3.71205e+06	9.05358e+06	7.55057e+06	9.80805e+06	9.85965e+06	1.00411e+07	6.43069e+06	7.41092e+06	7.94436e+06	2.59766e+07	2.3764e+07	2.45404e+07	2.35062e+07	2.33612e+07	2.31233e+07	1.70515e+07	1.75638e+07	1.72583e+07	1.33275e+07	2.62525e+07	2.61997e+07	1.14453e+07	1.17231e+07	1.2072e+07	1.26726e+07	1.20391e+07	1.28533e+07	8.72338e+06	8.33107e+06	8.48772e+06
498	210.062	210.05	210.076	343.176	341.563	351.724	167	36	36	34	9	36	16	3.84092e+07	3.65373e+07	3.76477e+07	4.6451e+07	4.85689e+07	4.95623e+07	2.33077e+07	3.80034e+07	3.5027e+07	4.15309e+07	4.07473e+07	4.16793e+07	3.37073e+07	3.86404e+07	3.9935e+07	4.22491e+07	4.00264e+07	4.05293e+07	3.87905e+07	3.94616e+07	3.86944e+07	4.10367e+07	3.98563e+07	4.1572e+07	2.98678e+07	3.39339e+07	2.83441e+07	4.44061e+07	4.53237e+07	4.53159e+07	3.73832e+07	3.51598e+07	3.55199e+07	4.39578e+07	4.17977e+07	4.39941e+07
499	210.028	210.015	210.048	447.687	444.7	449.75	139	27	30	32	4	30	16	8.12382e+06	8.28669e+06	8.59826e+06	7.07621e+06	8.18019e+06	8.97193e+06	2.02562e+06	5.40967e+06	4.78659e+06	7.18901e+06	8.06993e+06	8.40034e+06	4.18882e+06	4.9208e+06	5.93113e+06	4.66896e+06	5.73373e+06	6.07806e+06	4.62156e+06	5.52785e+06	4.44379e+06	4.95992e+06	4.29145e+06	4.29421e+06	2.8909e+06	3.75054e+06	3.64478e+06	5.40042e+06	4.78806e+06	5.54002e+06	3.90696e+06	3.80465e+06	4.75826e+06	3.68347e+06	4.73703e+06	3.90179e+06
500	210.133	210.132	210.134	243.938	243.498	254.28	60	8	15	10	6	6	15	3.56456e+06	3.41396e+06	3.42841e+06	4.93144e+06	5.47862e+06	6.01705e+06	1.5382e+06	4.25934e+06	3.36691e+06	1.33889e+06	1.41601e+06	1.39088e+06	1.634e+06	1.86892e+06	2.06046e+06	1.12849e+06	1.35039e+06	1.30775e+06	1.2507e+06	1.29756e+06	1.24357e+06	1.18453e+06	1.28962e+06	1.33263e+06	1.59745e+06	3.63219e+06	3.85703e+06	1.53435e+06	1.59456e+06	1.61748e+06	1.0912e+06	1.04567e+06	1.1416e+06	5.90337e+06	6.00286e+06	5.9099e+06
501	210.109	210.107	210.11	128.201	119.095	129.012	43	14	5	9	6	9	0	8.58718e+06	8.23724e+06	7.87989e+06	3.20621e+06	3.25196e+06	3.33324e+06	1.54232e+06	2.1154e+06	1.85849e+06	7.73725e+06	7.47237e+06	7.52144e+06	2.15662e+06	2.04181e+06	2.19622e+06	2.03929e+06	2.1794e+06	2.04692e+06	3.38489e+06	3.36228e+06	3.28027e+06	2.52303e+06	2.50882e+06	2.41713e+06	1.62927e+06	2.04373e+06	2.00142e+06	2.36005e+06	2.3625e+06	2.35197e+06	6.2593e+06	6.12284e+06	6.07533e+06	2.56375e+07	2.43282e+07	2.44379e+07
502	210.169	210.165	210.171	78.7613	75.2926	79.5381	83	36	1	34	8	0	4	1.71835e+06	1.755e+06	1.92719e+06	2.83535e+06	3.32571e+06	4.39433e+06	964069	1.62136e+06	1.54621e+06	2.22234e+06	2.43518e+06	2.66438e+06	2.09435e+06	1.57119e+06	2.02852e+06	1.37681e+06	1.09258e+06	1.2204e+06	2.34692e+06	2.51877e+06	2.67578e+06	1.01024e+06	915880	1.12825e+06	810869	1.55776e+06	1.61405e+06	2.23514e+06	2.3596e+06	2.56763e+06	1.32577e+06	1.30615e+06	1.51592e+06	2.37126e+06	2.49361e+06	3.00749e+06
503	211.045	211.044	211.07	331.064	329.298	346.442	167	36	36	34	9	36	16	1.7917e+07	1.6918e+07	3.48523e+06	1.85404e+07	1.67723e+07	1.63296e+07	2.57948e+06	2.00543e+07	2.96626e+06	3.67631e+06	3.49066e+06	3.55842e+06	2.44468e+06	1.95113e+07	1.83175e+07	3.1583e+06	1.8277e+07	1.75766e+07	2.11297e+07	2.04271e+07	1.96042e+07	1.97695e+07	1.95381e+07	1.86399e+07	3.25359e+06	1.87552e+07	1.82294e+07	2.04453e+07	1.94046e+07	1.9145e+07	2.06982e+07	1.9994e+07	1.94532e+07	2.07393e+07	2.01156e+07	1.85986e+07
504	211.083	211.071	211.09	159.628	157.732	163.683	134	36	20	34	9	19	16	7.21791e+06	6.49401e+06	5.929e+06	6.86647e+06	6.63378e+06	6.73262e+06	7.65539e+06	7.49508e+06	7.22857e+06	6.38484e+06	5.67003e+06	5.54816e+06	9.63295e+06	5.66965e+06	5.66329e+06	1.15279e+07	7.10635e+06	6.90276e+06	1.41564e+07	1.37408e+07	1.31412e+07	1.24403e+07	1.20093e+07	1.14447e+07	1.26115e+07	1.05767e+07	1.01108e+07	1.25739e+07	1.2327e+07	1.22113e+07	1.47862e+07	1.24653e+07	1.21985e+07	1.39962e+07	1.13906e+07	1.1176e+07
505	211.104	211.087	211.109	124.19	120.601	128.239	99	18	24	20	0	24	13	4.80624e+06	4.28087e+06	3.87421e+06	3.9454e+06	4.00883e+06	4.14475e+06	3.75206e+06	3.09617e+06	2.84745e+06	5.07826e+06	4.77169e+06	4.52946e+06	4.34993e+06	2.92106e+06	3.21225e+06	4.84358e+06	3.45289e+06	3.6267e+06	2.97882e+06	3.06588e+06	2.96648e+06	2.83052e+06	2.83433e+06	2.86507e+06	2.35193e+06	3.00354e+06	3.2014e+06	3.0314e+06	3.38862e+06	3.37073e+06	3.00277e+06	3.02121e+06	3.03302e+06	4.50789e+06	4.14685e+06	4.14738e+06
506	211.132	211.13	211.133	511.202	510.407	511.949	70	12	17	14	0	18	9	2.38972e+06	2.50289e+06	2.59153e+06	2.3652e+06	2.72576e+06	3.07048e+06	1.62248e+06	1.95557e+06	1.74386e+06	2.3763e+06	2.51878e+06	2.64852e+06	1.85785e+06	1.9378e+06	2.25238e+06	1.94568e+06	2.33413e+06	2.50684e+06	2.81933e+06	3.00075e+06	3.16969e+06	2.47812e+06	2.61261e+06	2.72404e+06	1.55514e+06	2.39745e+06	2.43914e+06	2.8971e+06	3.19706e+06	3.38186e+06	2.57648e+06	2.55271e+06	2.79023e+06	2.84315e+06	2.87243e+06	3.17445e+06
507	211.168	211.148	211.174	70.4179	67.0743	74.1437	167	36	36	34	9	36	16	2.63448e+06	2.79992e+06	2.62517e+06	5.27094e+06	5.33093e+06	5.89016e+06	723822	1.46632e+06	1.19408e+06	3.62887e+06	3.71325e+06	3.8539e+06	1.65196e+06	1.39731e+06	1.72841e+06	1.29406e+06	1.16637e+06	1.20044e+06	4.49058e+06	4.48837e+06	4.46978e+06	1.82399e+06	2.47806e+06	1.8107e+06	943817	2.4776e+06	2.48366e+06	1.64522e+06	1.75277e+06	1.6741e+06	991954	1.31903e+06	1.27352e+06	1.94998e+06	2.56094e+06	1.98447e+06
508	212.06	212.045	212.07	367.785	364.558	373.013	121	28	28	22	9	21	13	2.45942e+06	4.65876e+06	4.31854e+06	2.55012e+06	4.70047e+06	5.7871e+06	1.59484e+06	3.81084e+06	4.13475e+06	2.17241e+06	3.00886e+06	4.08763e+06	3.15337e+06	4.16739e+06	5.3801e+06	3.0253e+06	3.32979e+06	4.72731e+06	3.11805e+06	4.27631e+06	5.25027e+06	3.46178e+06	4.3676e+06	5.23824e+06	2.41978e+06	3.87107e+06	4.83736e+06	2.89353e+06	4.46602e+06	4.48173e+06	3.04779e+06	3.75793e+06	5.02296e+06	2.96573e+06	3.34027e+06	4.4428e+06
509	212.063	211.962	212.108	449.394	433.293	464.49	105	24	16	24	9	17	15	2.00333e+06	1.74024e+06	1.65435e+06	2.11542e+06	2.34185e+06	2.52727e+06	954869	828684	743694	1.80807e+06	1.76942e+06	1.46122e+06	1.41575e+06	798169	876133	1.43641e+06	945882	960210	2.53361e+06	2.33448e+06	2.33324e+06	2.19633e+06	2.02143e+06	1.97513e+06	1.11411e+06	896737	934574	2.28959e+06	2.17561e+06	2.2146e+06	1.21454e+06	2.42696e+06	2.40457e+06	1.3226e+06	2.64753e+06	2.53861e+06
510	212.149	212.129	212.186	101.137	68.7943	102.627	174	36	36	34	9	36	16	5.94528e+06	5.58959e+06	5.53173e+06	9.97721e+06	1.07104e+07	1.22064e+07	4.41381e+06	6.98712e+06	5.48218e+06	6.70892e+06	6.60273e+06	7.10424e+06	7.72294e+06	6.02998e+06	6.52768e+06	3.29076e+07	2.81869e+07	2.78394e+07	2.41542e+07	2.29497e+07	2.32856e+07	1.74565e+07	1.60351e+07	1.61788e+07	1.48629e+07	2.92289e+07	2.78732e+07	5.8308e+06	5.49065e+06	5.80803e+06	1.27631e+07	1.23037e+07	1.21221e+07	4.51865e+06	4.40405e+06	4.49332e+06
511	212.904	212.851	212.988	385.69	369.374	414.021	178	33	35	31	9	35	15	7.11335e+06	6.44456e+06	5.66042e+06	1.48227e+06	5.11695e+06	5.13425e+06	135407	1.82646e+06	2.03679e+06	4.85333e+06	4.84039e+06	4.4467e+06	476339	1.91033e+06	2.29176e+06	528340	3.27934e+06	2.18759e+06	3.2818e+06	3.35032e+06	3.22194e+06	3.46656e+06	3.18303e+06	3.49358e+06	307818	1.77878e+06	2.9075e+06	1.66765e+06	3.96542e+06	2.01499e+06	969400	1.9538e+06	2.01862e+06	1.73019e+06	3.1185e+06	1.89793e+06
512	213.075	213.073	213.077	524.599	523.684	525.383	167	36	36	34	9	36	16	6.19228e+06	6.51679e+06	6.55298e+06	6.01746e+06	6.65462e+06	6.92606e+06	3.2978e+06	4.86594e+06	4.71718e+06	5.66058e+06	6.4019e+06	6.13695e+06	7.6169e+06	4.99731e+06	5.50014e+06	8.17274e+06	5.83194e+06	5.91185e+06	6.23873e+06	5.84394e+06	6.04357e+06	5.56569e+06	5.86712e+06	5.9583e+06	3.45986e+06	5.19712e+06	5.29611e+06	6.08767e+06	6.35147e+06	6.70795e+06	6.06913e+06	5.70227e+06	5.4714e+06	6.2904e+06	5.29929e+06	5.96326e+06
513	213.06	213.06	213.07	178.547	177.576	179.449	158	34	35	31	9	33	16	2.76545e+07	2.99869e+07	2.95347e+07	2.86115e+07	3.13099e+07	3.10937e+07	6.7046e+06	2.71401e+07	2.31432e+07	2.50105e+07	2.89065e+07	3.02622e+07	2.78935e+06	2.53041e+07	2.72564e+07	3.28196e+06	3.03623e+07	2.95451e+07	2.27979e+07	2.13606e+07	1.91952e+07	2.21457e+07	2.14725e+07	1.9669e+07	1.02949e+07	1.98768e+07	1.84798e+07	2.45048e+07	2.36472e+07	2.21989e+07	2.1198e+07	2.14626e+07	2.03485e+07	2.2655e+07	2.27412e+07	2.09506e+07
514	213.153	213.146	213.164	101.991	99.8297	103.43	123	18	35	23	2	36	9	429670	478279	403714	683161	778628	794014	438775	509364	424024	462103	522936	490402	544773	401700	464152	2.64531e+06	2.17484e+06	2.2067e+06	1.70066e+06	1.60851e+06	1.65291e+06	1.23253e+06	1.04833e+06	1.01967e+06	1.22991e+06	2.18156e+06	2.08903e+06	348075	337884	314073	825906	767520	801463	372368	280110	250980
515	213.139	213.125	213.139	133.394	131.411	141.934	51	10	18	4	0	16	3	3.49022e+06	3.63377e+06	3.65061e+06	3.61336e+06	3.88135e+06	3.84085e+06	3.8198e+06	4.63954e+06	5.05918e+06	3.61285e+06	3.97552e+06	3.97599e+06	8.19025e+06	4.81022e+06	4.86756e+06	8.06781e+06	4.24202e+06	4.48452e+06	1.22362e+06	1.14223e+06	1.04679e+06	1.15563e+06	981714	1.02377e+06	1.32795e+06	1.13058e+06	1.08252e+06	1.09998e+06	926451	940614	1.29104e+06	1.18318e+06	971053	1.29157e+06	1.15184e+06	1.08045e+06
516	214.009	214.003	214.133	464.861	457.946	466.954	167	36	35	35	9	36	16	8.58724e+06	8.46236e+06	8.43206e+06	8.45872e+06	8.20884e+06	8.21722e+06	4.16741e+06	6.60229e+06	6.53131e+06	8.20492e+06	7.82957e+06	8.01044e+06	6.90987e+06	7.21711e+06	7.37117e+06	7.14701e+06	7.13175e+06	7.18593e+06	7.73878e+06	7.5219e+06	7.6153e+06	7.85546e+06	7.14326e+06	7.66157e+06	5.26076e+06	6.59248e+06	6.48181e+06	8.1557e+06	8.21827e+06	8.41882e+06	7.30404e+06	6.8634e+06	7.00026e+06	7.04738e+06	6.69823e+06	7.16327e+06
517	214.033	214.02	214.033	329.637	310.265	335.567	167	36	36	34	9	36	16	4.08525e+07	3.78654e+07	3.61737e+07	3.93593e+07	4.10476e+07	4.54029e+07	9.74606e+06	3.13678e+07	2.26519e+07	3.40437e+07	3.41497e+07	3.456e+07	2.12738e+07	2.99882e+07	3.50015e+07	2.57963e+07	4.20106e+07	4.3422e+07	4.92407e+07	4.74524e+07	4.70574e+07	4.52208e+07	4.51858e+07	4.45086e+07	1.27172e+07	3.77997e+07	2.75445e+07	5.00338e+07	5.17319e+07	5.35133e+07	4.4292e+07	4.15852e+07	4.2753e+07	4.67592e+07	4.462e+07	4.65541e+07
518	214.085	214.078	214.09	130.796	121.892	198.456	164	35	25	33	9	31	16	9.79735e+06	7.45833e+06	7.557e+06	6.07954e+06	7.65187e+06	9.23431e+06	7.24529e+06	4.2624e+06	3.54346e+06	6.95377e+06	7.80709e+06	9.01501e+06	1.15308e+07	2.4663e+06	2.44343e+06	1.31688e+07	3.25976e+06	3.09547e+06	1.88783e+07	1.52078e+07	1.70141e+07	1.14499e+07	1.16019e+07	5.15394e+06	6.45712e+06	4.91946e+06	4.62509e+06	1.3091e+07	1.37783e+07	5.31421e+06	1.36036e+07	1.23102e+07	5.34287e+06	1.47576e+07	1.38206e+07	4.51587e+06
519	214.088	214.083	214.094	424.9	423.868	425.954	59	2	12	14	0	23	8	1.16274e+06	1.15813e+06	1.19556e+06	1.18649e+06	1.27935e+06	1.53795e+06	256197	1.09117e+06	773609	1.11339e+06	1.15162e+06	1.2611e+06	865268	964598	1.12861e+06	949546	1.09397e+06	1.06014e+06	1.32621e+06	1.29111e+06	1.35465e+06	1.00221e+06	1.05671e+06	1.05249e+06	346563	929213	974280	1.21547e+06	1.35804e+06	1.34184e+06	890909	1.05129e+06	1.13408e+06	1.12454e+06	1.26078e+06	1.19231e+06
520	214.05	214.05	214.253	96.2136	72.8341	98.3965	122	36	15	34	9	13	15	4.08548e+07	3.82128e+07	3.78204e+07	2.82474e+07	3.0355e+07	3.25116e+07	1.65441e+07	3.9416e+07	3.08419e+07	2.81202e+07	2.72883e+07	2.86137e+07	2.48584e+07	2.25005e+07	2.22432e+07	3.53898e+07	3.48145e+07	3.32127e+07	5.65498e+06	5.78045e+06	5.74836e+06	4.12093e+06	2.14107e+06	3.80601e+06	2.58127e+06	2.19628e+06	3.56817e+06	2.80154e+06	2.69719e+06	2.61633e+06	3.66221e+06	3.50357e+06	3.45996e+06	3.08955e+06	3.03761e+06	2.87692e+06
521	214.252	214.245	214.263	153.326	151.123	163.683	54	10	12	14	9	7	2	1.17138e+06	1.1676e+06	1.16293e+06	2.23446e+06	2.45663e+06	2.62101e+06	421137	1.24851e+06	1.28796e+06	2.46571e+06	2.45458e+06	2.43936e+06	1.81427e+06	1.89865e+06	1.99009e+06	2.57259e+06	2.60763e+06	2.69845e+06	2.17792e+06	2.22725e+06	2.28344e+06	4.51566e+06	4.59764e+06	4.64102e+06	2.41779e+06	3.59812e+06	3.80155e+06	2.65145e+06	2.83141e+06	2.73877e+06	1.70655e+06	1.74268e+06	1.81919e+06	1.0331e+06	942788	1.04316e+06
522	215.041	215.011	215.045	327.021	312.83	354.017	153	35	32	31	6	35	14	2.34018e+06	2.17652e+06	2.02374e+06	2.25503e+06	2.28861e+06	2.57435e+06	1.38792e+06	1.86858e+06	1.1549e+06	1.99703e+06	2.00075e+06	1.93844e+06	4.78863e+06	1.70424e+06	1.97139e+06	1.63344e+06	2.59005e+06	2.68722e+06	3.05927e+06	2.83031e+06	2.81857e+06	2.70362e+06	2.63761e+06	2.84396e+06	637899	2.35027e+06	1.09063e+07	2.7814e+06	3.0815e+06	2.95709e+06	2.77468e+06	2.63445e+06	2.58046e+06	3.02186e+06	2.64916e+06	2.72021e+06
523	215.124	215.057	215.128	79.6825	78.5369	98.0161	88	36	8	34	9	0	1	1.25104e+07	1.20528e+07	1.23025e+07	1.23951e+07	1.43596e+07	1.80524e+07	5.08658e+06	1.31044e+07	1.0716e+07	1.16936e+07	1.2478e+07	1.37986e+07	9.34343e+06	1.033e+07	1.23238e+07	7.62644e+06	8.93101e+06	8.99754e+06	9.36976e+06	9.42171e+06	1.0459e+07	5.86717e+06	6.18543e+06	6.39019e+06	4.68755e+06	8.51752e+06	9.10137e+06	1.21547e+07	1.23826e+07	1.40042e+07	8.24149e+06	8.51053e+06	9.04382e+06	1.18321e+07	1.19034e+07	1.33006e+07
524	214.93	214.916	215.018	285.631	283.175	297.631	49	13	3	16	1	8	8	387556	353174	370926	436512	413183	473943	396763	364405	359559	347545	378729	502418	342300	323502	386628	300739	421536	459843	404749	493240	436850	376161	409846	405761	428176	406244	301925	351637	416808	417540	450250	401632	399228	369070	425199	461819
525	215.247	215.23	215.261	153.147	151.084	159.412	38	18	1	16	3	0	0	96778.1	107291	109169	263739	288797	306605	109083	104619	103182	263035	306779	302810	239132	208057	189863	392968	306458	340156	242173	228213	242375	615709	608502	608154	248540	484419	489093	290740	290320	340845	206004	224062	175050	115933	59494.2	82189.8
526	216.084	216.083	216.084	457.838	451.146	462.126	158	36	36	34	0	36	16	8.91643e+06	8.95005e+06	8.3947e+06	9.62361e+06	1.07558e+07	1.12795e+07	3.94329e+06	1.15854e+07	9.212e+06	8.20965e+06	8.52089e+06	8.43711e+06	1.48797e+07	1.09618e+07	1.29097e+07	1.77764e+07	1.43517e+07	1.48487e+07	1.61708e+07	1.62275e+07	1.55457e+07	1.46083e+07	1.4845e+07	1.46099e+07	8.77925e+06	1.47843e+07	1.47443e+07	1.56036e+07	1.60154e+07	1.6173e+07	1.59628e+07	1.59156e+07	1.59564e+07	1.71009e+07	1.73881e+07	1.76992e+07
527	216.036	216.026	216.099	420.064	411.091	423.788	155	32	31	34	9	34	15	1.91404e+07	1.98006e+07	2.15692e+07	1.92169e+07	2.18791e+07	2.58984e+07	3.43015e+06	1.38046e+07	1.12958e+07	1.68496e+07	1.82382e+07	1.97021e+07	1.11028e+07	1.21929e+07	1.40132e+07	1.28345e+07	1.52812e+07	1.61519e+07	1.36639e+07	1.38673e+07	1.46073e+07	1.58123e+07	1.66446e+07	1.65339e+07	4.65274e+06	1.26748e+07	1.29749e+07	1.43944e+07	1.5185e+07	1.60068e+07	1.1474e+07	1.20519e+07	1.27939e+07	1.3214e+07	1.42504e+07	1.4386e+07
528	216.16	216.138	216.162	246.519	244.696	254.329	137	32	31	26	9	30	9	288996	262133	311124	454032	509898	554681	50952.8	999696	849110	1.46851e+06	1.41753e+06	1.44607e+06	1.11204e+06	1.06674e+06	1.20596e+06	1.23732e+06	1.55435e+06	1.44713e+06	905117	835331	839444	1.34544e+06	1.27428e+06	1.32717e+06	979174	2.04224e+06	2.00272e+06	1.17137e+06	1.15266e+06	1.25337e+06	1.4692e+06	1.45642e+06	1.46363e+06	424214	396496	378397
529	216.114	216.106	216.161	276.885	266.257	281.22	95	13	28	13	0	26	15	5.0805e+06	5.33037e+06	5.23311e+06	4.8904e+06	5.7369e+06	6.18623e+06	324864	2.91375e+06	2.46186e+06	5.32491e+06	5.5973e+06	5.51454e+06	3.48751e+06	2.78838e+06	3.31448e+06	4.50251e+06	3.96755e+06	3.95659e+06	4.07136e+06	3.87956e+06	3.83267e+06	3.92432e+06	3.87804e+06	3.8878e+06	1.91323e+06	2.92577e+06	2.75103e+06	5.59523e+06	5.6891e+06	6.04019e+06	3.08822e+06	3.03531e+06	3.0132e+06	3.74021e+06	3.84327e+06	3.7796e+06
530	216.19	216.159	216.209	111.279	102.476	127.186	72	17	11	15	6	16	7	1.10306e+06	1.07308e+06	901211	4.69361e+06	4.12992e+06	2.65184e+06	566567	1.28487e+06	920280	2.29866e+06	2.09461e+06	1.8534e+06	851389	696003	812641	290350	239241	327186	805171	793212	743698	707108	644619	521699	254740	338005	284039	3.10633e+06	1.96947e+06	1.44972e+06	360540	321586	273220	2.41223e+06	2.25973e+06	2.13653e+06
531	216.186	216.127	216.204	77.1368	74.5033	80.3567	55	23	1	23	7	1	0	697196	655812	769451	1.50797e+06	1.56304e+06	1.16141e+06	466317	1.04344e+06	889382	1.19641e+06	1.25064e+06	1.07916e+06	1.6778e+06	1.46216e+06	1.58766e+06	1.59734e+06	1.50551e+06	1.53251e+06	3.96083e+06	3.85413e+06	4.53105e+06	1.47155e+06	1.36147e+06	1.51213e+06	753029	920751	1.01505e+06	933080	937844	875458	991431	905067	936295	945148	857703	796400
532	217.105	217.101	217.105	101.679	99.3691	102.627	167	36	36	34	9	36	16	2.17973e+07	2.21713e+07	2.27556e+07	4.16663e+07	4.61134e+07	5.13729e+07	1.35125e+07	3.22075e+07	2.86597e+07	2.59235e+07	2.70148e+07	3.01627e+07	2.74856e+07	2.82866e+07	3.06939e+07	1.13185e+08	1.26582e+08	1.27006e+08	1.10157e+08	1.08918e+08	1.10775e+08	7.78903e+07	7.57403e+07	7.77031e+07	7.84381e+07	1.35048e+08	1.31011e+08	2.29851e+07	2.38537e+07	2.57542e+07	5.86089e+07	5.89404e+07	6.01672e+07	1.69872e+07	1.74901e+07	1.88358e+07
533	217.085	217.01	217.104	432.207	425.677	433.961	164	33	36	34	9	36	16	1.54501e+07	1.6439e+07	1.75779e+07	1.49434e+07	1.68508e+07	1.76109e+07	5.62066e+06	1.61702e+07	1.73769e+07	1.5158e+07	1.68072e+07	1.74189e+07	7.1232e+06	1.61162e+07	1.62203e+07	4.30191e+06	1.52835e+07	1.61492e+07	4.81408e+06	5.02091e+06	5.45844e+06	4.74954e+06	1.64693e+07	5.34127e+06	1.14816e+07	4.78882e+06	5.12223e+06	1.62531e+07	1.78941e+07	1.7037e+07	3.86643e+06	1.65665e+07	1.69519e+07	1.49025e+07	1.68301e+07	1.77822e+07
534	217.172	217.164	217.183	72.4748	68.9657	74.4209	50	19	1	18	6	0	6	1.61457e+06	1.7089e+06	1.63171e+06	1.71096e+06	1.93016e+06	2.01605e+06	404299	1.39912e+06	1.1647e+06	1.85898e+06	1.97575e+06	2.01609e+06	465160	714490	752778	591429	937909	947779	979268	980116	995967	788703	854961	947724	512735	1.06253e+06	1.114e+06	1.7308e+06	1.77596e+06	1.75083e+06	660424	533340	623367	1.63065e+06	1.61547e+06	1.63562e+06
535	218.119	218.111	218.136	360.632	357.122	365.38	167	36	36	34	9	36	16	6.49514e+07	6.40404e+07	5.97816e+07	6.22829e+07	6.72173e+07	7.11017e+07	1.80004e+07	5.41206e+07	4.37785e+07	5.90942e+07	6.24799e+07	6.16566e+07	5.47538e+07	5.57621e+07	5.84901e+07	5.93491e+07	6.83374e+07	6.47523e+07	6.73682e+07	6.37633e+07	6.19017e+07	6.60915e+07	6.41921e+07	6.06061e+07	2.98891e+07	5.99434e+07	5.55729e+07	7.23484e+07	7.12698e+07	7.08906e+07	6.01674e+07	6.0733e+07	5.76971e+07	6.39104e+07	6.74652e+07	6.30007e+07
536	218.091	218.084	218.099	120.752	116.9	124.115	167	36	36	34	9	36	16	3.0181e+07	2.88463e+07	2.78983e+07	2.30895e+07	2.10566e+07	2.04939e+07	4.88585e+07	3.26104e+07	3.61385e+07	2.17875e+07	2.04489e+07	2.00587e+07	2.9569e+07	2.95714e+07	2.87336e+07	3.00901e+07	3.45551e+07	3.50814e+07	3.41002e+07	3.46987e+07	3.58389e+07	2.85449e+07	2.91657e+07	2.92269e+07	5.55408e+07	3.86246e+07	3.83192e+07	2.65376e+07	2.62385e+07	2.65563e+07	3.89284e+07	3.49689e+07	3.43263e+07	3.35977e+07	2.98367e+07	2.83283e+07
537	218.034	218.034	218.034	655.482	652.64	657.376	56	5	8	17	1	21	4	3.075e+07	3.01567e+07	2.97237e+07	3.09203e+07	3.10404e+07	3.0877e+07	3.86322e+07	2.78366e+07	2.70921e+07	3.12499e+07	3.16507e+07	3.06622e+07	3.59361e+07	3.02108e+07	2.99032e+07	3.41265e+07	2.98653e+07	2.93188e+07	3.19248e+07	3.27256e+07	3.17339e+07	3.26271e+07	3.18206e+07	3.12067e+07	2.79879e+07	3.13289e+07	3.11777e+07	3.32701e+07	3.38465e+07	3.28608e+07	3.20189e+07	3.23045e+07	3.17138e+07	3.19079e+07	3.35968e+07	3.26564e+07
538	218.163	218.155	218.178	72.6482	71.6777	76.5246	47	24	0	17	6	0	0	516289	564340	493919	1.31158e+06	1.46717e+06	1.59032e+06	342563	476015	417891	563108	520493	595896	181887	157132	202228	382846	338863	354927	489616	540088	493763	223880	234823	231585	196971	372977	324702	507903	502825	473550	82906.2	92890.5	116653	856012	927092	841591
539	218.211	218.176	218.221	172.862	171.14	210.701	68	21	9	20	6	11	1	41597.6	46786	56003.9	213398	196930	246859	117507	158027	150554	423741	445714	490250	535853	379565	417710	691453	598676	554197	894028	819742	877930	392614	400638	433672	399797	850388	778634	26878.1	28170.4	26401.6	222682	261984	244583	27301.7	21841.9	34576.8
540	218.984	218.984	218.984	656.72	654.442	659.811	20	3	0	9	7	1	0	3.44544e+07	4.22924e+07	4.31645e+07	3.51959e+07	4.27613e+07	4.36793e+07	4.36592e+06	3.96091e+07	4.11582e+07	3.61085e+07	4.29313e+07	4.41218e+07	4.36702e+06	4.15849e+07	4.33809e+07	4.27108e+06	4.15493e+07	4.21106e+07	4.15893e+07	4.4579e+07	4.48068e+07	4.22713e+07	4.48119e+07	4.52655e+07	1.18832e+07	4.44717e+07	4.29648e+07	3.99734e+07	4.59269e+07	4.59929e+07	1.40882e+07	4.11675e+07	4.48346e+07	1.70124e+07	4.45631e+07	4.65066e+07
541	218.975	218.955	219.068	384.242	374.782	385.936	167	36	36	34	9	36	16	6.9836e+07	7.28377e+07	7.38301e+07	6.99643e+07	7.82923e+07	8.12385e+07	3.2089e+07	6.55663e+07	5.82208e+07	6.91723e+07	7.56946e+07	7.86073e+07	5.73198e+07	6.05385e+07	6.60747e+07	7.08981e+07	7.0698e+07	7.17382e+07	7.21084e+07	7.14231e+07	7.129e+07	6.72834e+07	6.91656e+07	6.5772e+07	4.06818e+07	6.00888e+07	5.6999e+07	7.58e+07	8.16016e+07	8.45321e+07	6.06216e+07	6.5672e+07	6.44232e+07	6.63743e+07	7.25721e+07	7.40298e+07
542	219.075	219.074	219.078	100.697	97.8467	106.117	118	36	19	31	9	12	11	2.19325e+07	2.14111e+07	2.00324e+07	1.67435e+07	1.58173e+07	1.4802e+07	1.67407e+07	1.70412e+07	1.56066e+07	1.65671e+07	1.57255e+07	1.52051e+07	2.70726e+07	1.66656e+07	1.68894e+07	2.76786e+07	1.78281e+07	1.81085e+07	1.86272e+07	1.89702e+07	1.84959e+07	1.71846e+07	1.68389e+07	1.67654e+07	1.59806e+07	1.89494e+07	1.83771e+07	1.57647e+07	1.59177e+07	1.63074e+07	2.13621e+07	1.87714e+07	1.90194e+07	1.87972e+07	1.65699e+07	1.5587e+07
543	219.057	219.057	219.057	258.333	224.535	261.924	77	15	18	15	3	18	8	5.44208e+07	3.25268e+07	2.41465e+07	5.2057e+07	3.48348e+07	2.69662e+07	3.82498e+07	3.56228e+07	2.10694e+07	5.16977e+07	3.20598e+07	2.40588e+07	6.56844e+07	3.4508e+07	2.63153e+07	6.98073e+07	4.13709e+07	2.87605e+07	4.78945e+07	3.00543e+07	2.25944e+07	4.70728e+07	2.9148e+07	2.2537e+07	4.09086e+07	3.29543e+07	2.37601e+07	4.94918e+07	3.1886e+07	2.51096e+07	5.90407e+07	3.4167e+07	2.48605e+07	6.0663e+07	3.5893e+07	2.61421e+07
544	219.076	219.076	219.076	332.492	331.2	337.261	16	5	6	0	5	0	0	1.6254e+07	1.48519e+07	1.4058e+07	1.27241e+07	1.298e+07	1.2968e+07	6.56008e+06	1.20985e+07	9.14402e+06	1.11874e+07	1.08286e+07	9.44189e+06	1.73393e+07	1.12702e+07	1.29504e+07	2.2622e+07	1.56722e+07	1.54371e+07	1.96468e+07	1.77761e+07	1.63822e+07	1.65589e+07	1.53728e+07	1.56426e+07	6.69335e+06	1.70426e+07	1.08593e+07	1.58099e+07	1.51755e+07	1.60812e+07	2.02074e+07	1.88374e+07	1.8043e+07	1.69996e+07	1.59095e+07	1.488e+07
545	219.988	219.958	220.002	383.113	381.401	385.936	114	29	25	23	5	21	11	3.48651e+06	3.56011e+06	3.39755e+06	3.43174e+06	3.94975e+06	4.35623e+06	1.30474e+06	3.05989e+06	2.56679e+06	3.50345e+06	3.73557e+06	3.66534e+06	2.20619e+06	2.55958e+06	2.92344e+06	2.9541e+06	3.54327e+06	3.41343e+06	3.6305e+06	3.38221e+06	3.43639e+06	3.08567e+06	3.17457e+06	3.08471e+06	1.62104e+06	2.61149e+06	2.57193e+06	3.94361e+06	4.28929e+06	4.36458e+06	3.06287e+06	3.18812e+06	2.96394e+06	3.40218e+06	3.48984e+06	3.39604e+06
546	220.118	220.118	220.118	300.129	285.113	302.089	168	36	36	35	9	36	16	3.95066e+08	3.82062e+08	3.93663e+08	3.94853e+08	4.3335e+08	4.21283e+08	1.38075e+08	3.0664e+08	2.29656e+08	3.89934e+08	3.95491e+08	4.153e+08	4.37285e+08	3.06594e+08	3.36484e+08	5.24874e+08	3.9979e+08	4.11236e+08	3.68768e+08	3.77803e+08	3.69511e+08	3.42096e+08	3.46182e+08	3.44368e+08	1.35107e+08	3.1344e+08	2.97971e+08	3.89882e+08	4.12737e+08	4.41566e+08	3.32704e+08	3.25239e+08	3.49447e+08	3.69157e+08	3.81794e+08	3.72389e+08
547	220.042	220.039	220.043	99.7093	98.9795	100.206	35	17	1	7	9	0	1	282353	443032	619310	346967	563136	645232	62242.4	471401	684705	280314	436536	632276	141078	544025	918346	232570	640945	982919	1.25956e+06	1.47204e+06	2.33009e+06	894017	1.58906e+06	1.47421e+06	685306	1.05479e+06	1.84798e+06	1.5574e+06	2.17684e+06	2.34747e+06	916373	1.71434e+06	2.16919e+06	1.04506e+06	2.01809e+06	2.56516e+06
548	221.092	221.092	221.096	104.988	102.476	107.591	168	36	36	35	9	36	16	1.58602e+08	1.49667e+08	1.42386e+08	1.21361e+08	1.12381e+08	1.08056e+08	1.36342e+08	1.49061e+08	1.36244e+08	1.16546e+08	1.07362e+08	1.06806e+08	2.72158e+08	1.4122e+08	1.41572e+08	2.77004e+08	1.45373e+08	1.45582e+08	1.67056e+08	1.63474e+08	1.59487e+08	1.42517e+08	1.33119e+08	1.32198e+08	1.18263e+08	1.51991e+08	1.47352e+08	1.34007e+08	1.31174e+08	1.32488e+08	1.92503e+08	1.67223e+08	1.61154e+08	1.68049e+08	1.45508e+08	1.4019e+08
549	221.122	221.117	221.123	300.056	284.848	302.013	167	36	36	34	9	36	16	4.06485e+07	3.99847e+07	4.05869e+07	4.03141e+07	4.41353e+07	4.2395e+07	1.47445e+07	3.1532e+07	2.37511e+07	3.98004e+07	4.02981e+07	4.22602e+07	4.47579e+07	3.15599e+07	3.39855e+07	5.37655e+07	4.05772e+07	4.17517e+07	3.76283e+07	3.85762e+07	3.78079e+07	3.5371e+07	3.53325e+07	3.48464e+07	1.43036e+07	3.14284e+07	3.02297e+07	3.96825e+07	4.18941e+07	4.49932e+07	3.43179e+07	3.33951e+07	3.59243e+07	3.80361e+07	3.89851e+07	3.83467e+07
550	221.023	221.019	221.028	438.613	434.09	443.837	130	23	36	23	9	31	8	4.49402e+06	4.46505e+06	4.66254e+06	4.39704e+06	4.81018e+06	5.50226e+06	1.73312e+06	6.1158e+06	5.10481e+06	4.89562e+06	5.22585e+06	5.64643e+06	5.69059e+06	6.11254e+06	7.04723e+06	6.23937e+06	7.32511e+06	7.47659e+06	3.4297e+06	3.50166e+06	3.81693e+06	2.95535e+06	3.23051e+06	3.38444e+06	2.12333e+06	5.41827e+06	5.39731e+06	4.06385e+06	4.08284e+06	4.66466e+06	4.11633e+06	4.46746e+06	4.79826e+06	6.10335e+06	6.28378e+06	6.61515e+06
551	221.092	221.078	221.189	367.012	353.945	370.194	148	33	34	29	7	32	13	6.69041e+07	5.62637e+07	4.57262e+07	4.82962e+07	4.5451e+07	4.57292e+07	1.83795e+07	546474	3.15181e+07	4.10295e+07	3.71556e+07	3.2756e+07	7.84282e+07	541945	4.43921e+07	9.51051e+07	6.71311e+07	6.09348e+07	7.55755e+07	6.55041e+07	6.40234e+07	1.24473e+06	6.00123e+07	5.73237e+07	2.37964e+07	5.94619e+07	4.41691e+07	6.83003e+07	6.28616e+07	6.13375e+07	8.95395e+07	6.31809e+07	5.75106e+07	7.86572e+07	6.1798e+07	5.60517e+07
552	221.217	221.155	221.229	69.2544	65.9679	72.8488	77	3	29	0	2	29	14	471822	476099	454459	414165	429642	488606	268997	402810	343039	511123	558725	520791	129860	91269.4	151005	465122	411541	442715	520793	412948	447611	497748	427549	422661	300579	403335	402970	724251	661513	645483	116156	83594.2	158192	429587	383453	359487
553	221.17	221.169	221.171	242.656	241.002	253.478	31	8	6	5	3	1	8	82853.9	86596	86025.2	84765.1	110019	125746	200361	113418	154713	2.52e+06	2.458e+06	2.34168e+06	89985.9	64392.2	122225	165291	207839	196683	64251.4	75774.1	55586.6	58044.6	65809.4	97103.2	421038	620840	518609	37626.7	67546.2	33197	98364.2	85446.3	88413.7	1.06791e+06	936873	801964
554	222.006	222.005	222.055	655.684	652.25	659.991	164	35	36	33	9	35	16	8.2199e+07	8.00676e+07	7.9699e+07	8.25571e+07	8.20742e+07	8.30398e+07	1.01198e+08	6.4565e+07	6.10663e+07	8.33244e+07	8.33592e+07	8.37371e+07	9.67367e+07	8.03802e+07	8.0683e+07	9.31431e+07	7.77353e+07	7.81283e+07	8.85211e+07	8.58154e+07	8.6357e+07	8.77492e+07	8.49243e+07	8.52448e+07	6.73745e+07	8.48581e+07	8.38087e+07	9.0752e+07	9.14822e+07	9.25361e+07	9.23855e+07	8.75457e+07	8.46949e+07	9.58474e+07	8.89233e+07	9.02055e+07
555	222.095	222.095	222.096	104.831	103.751	105.424	48	22	10	7	9	0	0	1.81041e+07	1.71189e+07	1.59853e+07	1.37309e+07	1.29146e+07	1.24501e+07	1.50462e+07	1.68805e+07	1.53751e+07	1.30913e+07	1.22785e+07	1.20754e+07	3.08279e+07	1.60102e+07	1.57964e+07	3.11673e+07	1.64935e+07	1.64161e+07	1.87918e+07	1.853e+07	1.81953e+07	1.57797e+07	1.48198e+07	1.50231e+07	1.31555e+07	1.74849e+07	1.69012e+07	1.53763e+07	1.52151e+07	1.49159e+07	2.1956e+07	1.88395e+07	1.83347e+07	1.90828e+07	1.67298e+07	1.58332e+07
556	222.941	222.899	223.027	384.165	369.613	386.536	165	36	35	34	9	35	16	6.70324e+06	7.15109e+06	7.40954e+06	7.18614e+06	7.94504e+06	7.99134e+06	3.61971e+06	7.52003e+06	5.93451e+06	6.37477e+06	6.74617e+06	7.42945e+06	1.11226e+07	8.08145e+06	9.46325e+06	1.21094e+07	5.12533e+06	5.80283e+06	6.97371e+06	8.13871e+06	9.04369e+06	8.4752e+06	9.21279e+06	9.83428e+06	4.20054e+06	8.41796e+06	7.95937e+06	3.39631e+06	7.785e+06	8.1231e+06	4.47595e+06	9.15012e+06	9.46547e+06	3.81945e+06	8.80441e+06	9.46244e+06
557	223.14	223.079	223.156	78.0806	64.7348	90.9741	60	27	0	25	7	1	0	3.40759e+06	3.78321e+06	3.9909e+06	3.32713e+06	3.37528e+06	3.74957e+06	2.87753e+06	3.12099e+06	3.8877e+06	3.24381e+06	3.36231e+06	3.42617e+06	2.42537e+06	3.34965e+06	3.37446e+06	8.18508e+06	8.82704e+06	8.73878e+06	6.11522e+06	6.09538e+06	6.76181e+06	6.36374e+06	6.50255e+06	7.03826e+06	8.0267e+06	9.16804e+06	9.7002e+06	3.26665e+06	3.29575e+06	5.32003e+06	5.76436e+06	6.53805e+06	6.36362e+06	3.42729e+06	3.45861e+06	3.58392e+06
558	224.11	224.079	224.112	365.971	365.372	372.487	169	36	36	36	9	36	16	8.82405e+07	1.027e+08	8.42294e+07	7.776e+07	1.27828e+08	1.66941e+08	1.52234e+07	2.24499e+07	1.36751e+07	5.5565e+07	7.36636e+07	7.5402e+07	1.50801e+07	1.88174e+07	2.80976e+07	1.97642e+07	4.2857e+07	5.10226e+07	3.64327e+07	4.18549e+07	4.56868e+07	2.7795e+07	3.2266e+07	3.35796e+07	1.21635e+07	1.68059e+07	1.39599e+07	4.82527e+07	6.37406e+07	7.55959e+07	1.90964e+07	2.19617e+07	2.2851e+07	2.68384e+07	3.65029e+07	3.7237e+07
559	224.002	224	224.092	633.937	629.324	638.481	152	33	30	33	9	33	14	1.14902e+06	1.52644e+06	1.45766e+06	1.23579e+06	1.61789e+06	1.7282e+06	387492	1.07519e+06	875682	1.23401e+06	1.5214e+06	1.53018e+06	7.11399e+06	1.1739e+06	1.40975e+06	7.17642e+06	1.38008e+06	1.47173e+06	1.63221e+06	1.86465e+06	1.83704e+06	1.55368e+06	1.61858e+06	1.6334e+06	423908	1.5641e+06	1.39282e+06	7.91812e+06	1.95239e+06	1.98545e+06	7.00858e+06	1.73621e+06	1.74164e+06	7.6492e+06	1.8062e+06	1.82108e+06
560	224.099	224.088	224.114	127.748	125.733	128.79	115	30	18	31	9	13	14	3.69561e+06	4.07522e+06	5.19816e+06	3.72252e+06	4.62858e+06	5.67279e+06	2.04842e+06	4.13919e+06	3.97136e+06	4.03473e+06	6.03283e+06	7.27195e+06	2.84231e+06	4.55088e+06	5.84621e+06	3.08271e+06	5.03688e+06	5.85821e+06	5.05613e+06	5.90057e+06	6.59943e+06	4.80305e+06	5.9341e+06	6.32433e+06	2.53037e+06	4.55962e+06	5.09185e+06	3.16713e+06	3.9312e+06	4.99828e+06	3.21222e+06	5.17925e+06	5.73086e+06	3.99526e+06	5.7276e+06	6.70763e+06
561	224.142	224.118	224.149	76.1643	75.7095	77.0011	73	30	0	34	9	0	0	4.04549e+06	4.31062e+06	4.23636e+06	4.04878e+06	4.60042e+06	4.87283e+06	2.67011e+06	4.09993e+06	2.648e+06	4.90587e+06	3.66807e+06	3.65485e+06	4.20243e+06	3.02861e+06	3.15935e+06	4.83978e+06	4.61546e+06	4.54291e+06	4.80036e+06	4.4859e+06	4.40548e+06	4.16553e+06	3.96444e+06	3.14995e+06	3.04585e+06	4.07849e+06	3.89817e+06	4.86105e+06	4.76634e+06	4.97045e+06	3.50281e+06	3.31563e+06	3.05835e+06	3.67279e+06	4.31419e+06	3.3408e+06
562	225.072	225.072	225.072	633.563	629.867	637.952	167	36	36	34	9	36	16	2.7014e+07	2.50379e+07	2.51268e+07	2.776e+07	2.78233e+07	3.03813e+07	1.27876e+07	1.83848e+07	1.49874e+07	2.83601e+07	2.62918e+07	2.71038e+07	2.92831e+07	2.15066e+07	2.3127e+07	3.05374e+07	2.43261e+07	2.40134e+07	3.22161e+07	3.04698e+07	3.0272e+07	2.97763e+07	2.81246e+07	2.76604e+07	1.51519e+07	2.56331e+07	2.53432e+07	3.44898e+07	3.40994e+07	3.47435e+07	3.0722e+07	2.815e+07	2.84179e+07	3.31277e+07	3.10806e+07	3.03233e+07
563	225.123	225.108	225.129	491.422	483.69	495.672	159	34	35	33	9	33	15	9.63925e+06	9.45351e+06	9.45471e+06	1.00493e+07	1.08213e+07	1.05211e+07	3.35639e+06	8.61951e+06	7.70173e+06	9.89125e+06	1.02572e+07	9.97688e+06	3.02618e+06	8.39902e+06	8.74012e+06	2.49589e+06	7.69056e+06	7.47837e+06	9.27108e+06	9.21888e+06	8.84778e+06	6.84111e+06	6.55564e+06	6.40716e+06	3.39887e+06	6.17401e+06	6.11437e+06	9.74046e+06	9.43679e+06	9.49728e+06	7.07493e+06	8.09419e+06	7.92707e+06	9.37586e+06	9.57678e+06	9.41138e+06
564	225.114	225.106	225.117	365.588	365.024	369.538	99	16	27	18	0	27	11	7.00083e+06	8.49909e+06	6.85273e+06	6.23886e+06	1.06492e+07	1.44927e+07	942106	1.49161e+06	848664	4.50144e+06	6.06731e+06	6.16011e+06	857701	1.26149e+06	2.04602e+06	1.19956e+06	3.43816e+06	4.06825e+06	2.90591e+06	3.26141e+06	3.81133e+06	1.98542e+06	2.45357e+06	2.65722e+06	735439	1.09326e+06	1.09391e+06	3.88077e+06	5.47277e+06	6.2329e+06	1.33507e+06	1.53104e+06	1.72465e+06	1.83966e+06	2.76811e+06	2.78518e+06
565	225.098	225.098	225.098	288.225	284.745	291.118	68	33	31	0	0	0	4	4.76465e+06	6.76367e+06	8.46509e+06	5.3516e+06	8.59343e+06	1.07343e+07	1.93176e+06	7.04704e+06	7.62434e+06	4.14212e+06	6.2945e+06	8.32083e+06	3.79796e+06	6.57023e+06	9.16873e+06	4.29173e+06	8.16035e+06	9.98881e+06	9.42059e+06	1.1725e+07	1.31634e+07	8.12681e+06	1.03982e+07	1.17071e+07	4.67517e+06	9.60981e+06	1.16082e+07	8.49107e+06	1.12344e+07	1.33141e+07	8.24334e+06	1.08769e+07	1.25527e+07	8.94812e+06	1.18547e+07	1.31351e+07
566	225.018	225.01	225.034	399.642	397.317	410.281	14	2	6	0	6	0	0	784802	864917	872129	1.18893e+06	1.42123e+06	1.30907e+06	417488	993499	852494	844569	684727	981260	993036	989972	1.23446e+06	1.1881e+06	1.41405e+06	1.29361e+06	1.97359e+06	2.00983e+06	1.8736e+06	1.53224e+06	1.78454e+06	1.79053e+06	495395	1.31973e+06	1.31344e+06	1.65535e+06	1.81177e+06	1.95339e+06	1.44711e+06	1.62006e+06	2.01454e+06	1.35439e+06	1.60698e+06	1.58136e+06
567	225.185	225.181	225.189	70.712	66.9875	72.4831	86	0	35	0	0	35	16	1.71169e+06	1.69516e+06	1.62511e+06	1.6441e+06	1.66613e+06	1.9116e+06	1.05162e+06	1.72796e+06	1.49571e+06	2.05403e+06	2.02596e+06	2.08924e+06	1.3289e+06	1.06906e+06	960770	1.90419e+06	1.75303e+06	1.73842e+06	1.56855e+06	1.44996e+06	1.46544e+06	1.66689e+06	1.67463e+06	1.64837e+06	1.52734e+06	1.8726e+06	1.96419e+06	1.96484e+06	1.93209e+06	1.93391e+06	1.14141e+06	1.20397e+06	1.05379e+06	1.66976e+06	1.5504e+06	1.53042e+06
568	226.006	225.984	226.021	389.367	384.884	391.142	164	33	36	34	9	36	16	2.66647e+06	1.98885e+06	1.85854e+06	2.42425e+06	2.33024e+06	2.22112e+06	771491	1.9341e+06	1.37154e+06	2.68177e+06	2.07991e+06	1.92408e+06	1.62644e+06	1.7292e+06	1.75466e+06	2.09866e+06	2.00596e+06	2.00709e+06	2.36654e+06	2.08627e+06	1.82469e+06	2.26507e+06	1.81932e+06	1.7209e+06	1.01972e+06	1.63529e+06	1.71875e+06	2.44228e+06	2.23693e+06	2.14113e+06	2.30323e+06	1.78169e+06	1.64792e+06	2.59128e+06	2.11142e+06	1.90876e+06
569	226.025	226.022	226.026	340.868	339.732	343.041	101	18	24	20	7	22	10	917421	1.11184e+06	986775	1.2872e+06	1.03987e+06	817541	1.56645e+06	1.0826e+06	1.34875e+06	951107	1.20126e+06	1.10536e+06	1.04079e+06	1.04297e+06	948864	1.14977e+06	830408	951157	1.13518e+06	950187	1.26397e+06	1.0661e+06	1.14393e+06	930143	1.39684e+06	962589	577226	973157	895804	934765	890386	1.1743e+06	953838	954055	990177	1.12103e+06
570	226.085	226.083	226.107	228.943	187.7	230.13	170	36	36	36	9	36	16	2.5163e+07	2.37505e+07	2.28994e+07	2.83789e+07	2.96903e+07	3.14137e+07	7.2157e+06	1.36625e+07	1.16999e+07	3.08657e+07	3.05848e+07	3.08239e+07	1.09215e+07	1.04431e+07	1.09412e+07	1.96494e+07	1.95194e+07	1.94951e+07	1.45957e+07	1.39812e+07	1.378e+07	1.38319e+07	1.35189e+07	1.29746e+07	8.6567e+06	1.23512e+07	1.2112e+07	1.67398e+07	1.62832e+07	1.64716e+07	1.27576e+07	1.2144e+07	1.22462e+07	1.53166e+07	1.45853e+07	1.41966e+07
571	226.051	226.041	226.071	444.591	442.365	446.695	167	36	36	34	9	36	16	3.9367e+06	3.75593e+06	3.50463e+06	3.91067e+06	3.78983e+06	4.08839e+06	3.01234e+06	4.03481e+06	3.36794e+06	4.02764e+06	3.9028e+06	3.63724e+06	7.06546e+06	3.96019e+06	4.19901e+06	7.16825e+06	4.38491e+06	4.23661e+06	4.16446e+06	3.78341e+06	3.84816e+06	3.83982e+06	3.83086e+06	3.5864e+06	2.4588e+06	3.89663e+06	3.982e+06	3.91076e+06	3.9147e+06	3.82193e+06	3.99907e+06	3.853e+06	3.928e+06	4.58619e+06	4.34084e+06	4.32155e+06
572	226.082	226.079	226.088	526.972	526.246	528.117	165	35	36	33	9	36	16	3.42228e+06	3.40654e+06	3.55549e+06	3.48079e+06	3.71204e+06	4.14296e+06	2.19881e+06	3.03997e+06	2.37337e+06	3.10211e+06	3.62826e+06	3.45958e+06	5.08189e+06	3.0146e+06	3.13678e+06	5.23285e+06	3.23294e+06	3.11335e+06	3.31433e+06	3.5843e+06	3.39784e+06	3.30674e+06	3.34059e+06	3.46454e+06	1.87044e+06	2.9678e+06	3.04499e+06	3.27284e+06	3.50595e+06	3.62295e+06	2.99529e+06	3.19999e+06	3.43431e+06	3.15525e+06	3.1977e+06	3.46578e+06
573	226.17	226.158	226.179	100.905	97.1603	103.786	122	19	34	17	1	35	16	1.89742e+06	1.87319e+06	1.86693e+06	5.17943e+06	5.28857e+06	5.45356e+06	4.90817e+06	3.73994e+06	3.17474e+06	2.54724e+06	2.46118e+06	2.66579e+06	4.36131e+06	3.2999e+06	3.4976e+06	1.80043e+07	5.35776e+06	5.47887e+06	8.30418e+06	7.94085e+06	7.47953e+06	4.23698e+06	3.71122e+06	3.84784e+06	3.26884e+06	5.71319e+06	5.49568e+06	2.08064e+06	2.08338e+06	2.32141e+06	2.56109e+06	2.75245e+06	2.79396e+06	2.72132e+06	2.64388e+06	2.74111e+06
574	226.172	226.142	226.188	66.843	62.4179	82.8122	130	34	22	32	9	18	15	6.91126e+06	6.37721e+06	6.05324e+06	1.16984e+07	1.198e+07	1.24013e+07	3.66635e+06	6.91535e+06	5.99372e+06	7.64947e+06	7.13417e+06	6.96989e+06	8.71977e+06	6.16389e+06	6.76008e+06	6.63906e+06	1.5373e+07	1.55059e+07	3.0247e+07	2.9086e+07	2.79048e+07	1.40315e+07	1.31897e+07	1.28733e+07	7.81672e+06	1.69781e+07	1.6309e+07	7.86484e+06	7.91343e+06	7.5731e+06	6.85144e+06	6.78354e+06	6.7334e+06	1.62308e+07	1.56147e+07	1.49354e+07
575	226.988	226.984	226.99	414.929	413.237	416.164	169	36	36	36	9	36	16	3.0855e+06	3.99324e+06	4.27058e+06	3.31162e+06	4.07837e+06	3.9708e+06	4.87308e+06	4.57221e+06	5.34298e+06	3.34979e+06	3.79947e+06	4.43852e+06	4.28824e+06	4.45559e+06	5.35962e+06	4.04602e+06	4.55924e+06	4.27351e+06	4.33532e+06	4.83607e+06	4.63235e+06	4.22445e+06	5.02659e+06	6.00293e+06	4.27815e+06	4.34007e+06	4.53621e+06	3.65575e+06	4.03296e+06	4.43895e+06	3.13447e+06	4.0798e+06	4.60956e+06	3.41607e+06	4.17675e+06	4.61936e+06
576	227.125	227.124	227.125	217.734	217.2	218.267	167	36	36	34	9	36	16	1.12867e+08	1.03271e+08	9.96907e+07	1.09539e+08	1.19748e+08	1.35507e+08	1.31103e+07	7.65184e+07	5.61713e+07	1.03217e+08	1.01376e+08	1.03654e+08	7.67502e+07	6.886e+07	7.95246e+07	9.57429e+07	1.00809e+08	1.00044e+08	1.15514e+08	1.06681e+08	1.03719e+08	9.70042e+07	9.25444e+07	8.98833e+07	2.65386e+07	7.72929e+07	7.43754e+07	1.26393e+08	1.24845e+08	1.32534e+08	9.32559e+07	9.24832e+07	9.10888e+07	1.09026e+08	1.04179e+08	1.03606e+08
577	227.114	227.112	227.115	509.355	508.553	511.86	167	36	36	34	9	36	16	8.74193e+06	7.92633e+06	7.96306e+06	9.57247e+06	1.02674e+07	1.13966e+07	1.68422e+06	6.21567e+06	4.52144e+06	7.8369e+06	7.794e+06	8.11016e+06	5.84998e+06	5.80034e+06	6.43657e+06	6.49013e+06	7.39833e+06	7.17929e+06	8.72544e+06	8.08993e+06	7.97973e+06	8.61833e+06	8.16919e+06	7.78383e+06	2.55788e+06	6.48556e+06	6.16129e+06	9.44966e+06	9.15579e+06	9.27037e+06	7.17461e+06	7.38166e+06	7.24203e+06	8.16543e+06	8.09549e+06	8.09001e+06
578	227.078	227.067	227.079	343.592	342.802	350.905	166	35	36	34	9	36	16	1.26309e+07	1.24224e+07	1.17992e+07	9.77335e+06	1.16331e+07	1.28622e+07	872241	8.89526e+06	5.33904e+06	8.82729e+06	9.51305e+06	9.64003e+06	5.98487e+06	8.47176e+06	1.05149e+07	7.85095e+06	1.18406e+07	1.29502e+07	1.45196e+07	1.47095e+07	1.49404e+07	1.03158e+07	9.83276e+06	1.00401e+07	1.88461e+06	9.4598e+06	7.10323e+06	1.34237e+07	1.37807e+07	1.38431e+07	1.24693e+07	1.20688e+07	1.29307e+07	1.21288e+07	1.20535e+07	1.36075e+07
579	227.025	227.008	227.033	464.688	456.906	467.144	164	35	36	32	9	36	16	4.062e+06	3.95299e+06	4.01173e+06	3.6266e+06	3.70901e+06	3.81517e+06	1.54605e+06	2.1899e+06	2.06473e+06	3.67609e+06	3.61805e+06	3.5919e+06	3.53896e+06	2.39314e+06	2.66505e+06	3.15217e+06	2.3837e+06	2.36082e+06	2.93551e+06	2.90624e+06	2.95622e+06	2.79343e+06	2.84836e+06	2.76783e+06	1.26564e+06	2.02684e+06	2.00184e+06	3.6275e+06	3.57011e+06	3.64872e+06	2.15127e+06	2.27776e+06	2.32179e+06	2.06529e+06	2.17527e+06	2.22506e+06
580	227.175	227.174	227.176	261.356	260.08	285.113	127	28	21	30	0	32	16	1.79221e+06	1.68087e+06	1.73379e+06	2.02079e+06	2.20577e+06	2.29722e+06	468376	1.10868e+06	971871	1.70935e+06	1.7783e+06	1.81304e+06	652712	637810	662606	1.67012e+06	1.73078e+06	1.83136e+06	315146	298366	256711	415371	399257	392822	117523	332109	329043	874322	895835	1.03427e+06	160106	179074	186702	569246	603832	634089
581	227.165	227.125	227.195	70.8425	62.7356	99.1597	108	36	5	34	9	11	13	2.7111e+06	2.77355e+06	2.63036e+06	2.80842e+06	3.07838e+06	3.42162e+06	884043	2.10912e+06	1.76297e+06	2.90647e+06	2.80464e+06	3.09096e+06	2.35695e+07	2.13358e+07	2.3384e+07	2.44316e+06	2.12101e+06	2.18246e+06	8.70596e+06	8.60023e+06	8.52961e+06	1.9475e+06	2.00172e+06	1.97563e+06	2.47958e+06	4.52353e+06	4.44933e+06	2.9761e+06	3.18833e+06	3.16763e+06	2.02142e+07	2.04054e+07	2.0605e+07	5.37454e+06	5.16061e+06	5.1639e+06
582	228.025	228.022	228.035	406.747	406.366	416.077	169	36	36	36	9	36	16	2.28049e+07	2.33967e+07	2.42997e+07	2.24553e+07	2.27883e+07	2.49092e+07	1.46617e+07	2.20167e+07	2.01212e+07	2.14982e+07	2.10329e+07	2.3588e+07	2.26674e+07	2.06615e+07	2.18142e+07	2.40659e+07	2.28347e+07	2.36044e+07	2.33485e+07	2.30512e+07	2.37095e+07	2.18934e+07	2.29005e+07	2.25298e+07	1.42417e+07	2.1155e+07	2.08628e+07	2.30714e+07	2.45374e+07	2.54776e+07	1.98496e+07	2.1742e+07	2.21207e+07	2.10527e+07	2.21522e+07	2.2365e+07
583	228.136	228.131	228.144	217.654	217.097	218.267	164	34	36	34	9	36	15	1.02389e+07	9.18058e+06	9.13163e+06	9.81831e+06	1.06572e+07	1.16784e+07	2.47861e+06	7.42864e+06	5.74429e+06	9.28048e+06	9.61035e+06	9.01444e+06	7.44064e+06	6.73566e+06	7.53853e+06	8.83588e+06	9.21563e+06	8.97002e+06	1.04935e+07	9.84303e+06	9.35869e+06	8.82942e+06	8.6841e+06	8.32807e+06	3.67786e+06	7.16641e+06	7.19413e+06	1.13929e+07	1.14444e+07	1.17982e+07	8.89457e+06	8.55663e+06	8.2778e+06	9.98105e+06	9.67339e+06	9.69314e+06
584	228.087	228.086	228.142	102.373	97.9505	104.496	103	35	7	34	9	2	16	9.43149e+06	7.68379e+06	7.21938e+06	1.01678e+07	9.11647e+06	9.20266e+06	1.74148e+07	1.33241e+07	1.13316e+07	8.02035e+06	6.9478e+06	6.62783e+06	1.74023e+07	1.02091e+07	9.37381e+06	3.43764e+07	1.18806e+07	1.12823e+07	1.30799e+07	1.1868e+07	1.10425e+07	1.24912e+07	1.09121e+07	1.04009e+07	9.92471e+06	1.07343e+07	9.87463e+06	1.33275e+07	1.22216e+07	1.22224e+07	1.55044e+07	1.21169e+07	1.15871e+07	1.52199e+07	1.15089e+07	1.06336e+07
585	228.106	228.094	228.126	272.894	271.511	274.728	103	15	25	25	1	22	15	4.89823e+06	4.59187e+06	4.27778e+06	4.37378e+06	4.42464e+06	3.84501e+06	2.43206e+06	4.31145e+06	3.40519e+06	3.8824e+06	4.00818e+06	4.01614e+06	6.29252e+06	6.32378e+06	7.45714e+06	5.4932e+06	6.59159e+06	6.47594e+06	5.45135e+06	5.14208e+06	5.02882e+06	3.62665e+06	3.27375e+06	3.14736e+06	3.38948e+06	4.62212e+06	4.43959e+06	3.9254e+06	3.73902e+06	3.58523e+06	6.58239e+06	6.41848e+06	6.25322e+06	6.49731e+06	6.4336e+06	6.3333e+06
586	228.196	228.18	228.206	71.9638	68.2958	73.7291	153	34	31	33	9	30	16	3.29766e+07	3.15873e+07	3.08078e+07	9.00768e+07	9.58777e+07	1.04544e+08	8.17174e+06	1.84724e+07	1.48143e+07	5.29518e+07	5.27534e+07	5.40514e+07	4.18078e+07	3.36815e+07	3.64171e+07	1.43265e+07	1.04959e+07	1.07854e+07	8.01799e+07	7.82753e+07	7.82957e+07	2.09031e+07	2.0068e+07	2.00859e+07	9.80834e+06	1.79808e+07	1.79882e+07	1.0573e+07	1.05425e+07	1.081e+07	2.46999e+07	2.3972e+07	2.40163e+07	2.79343e+07	2.73284e+07	2.71791e+07
587	228.984	228.983	228.99	412.937	411.801	416.079	169	36	36	36	9	36	16	1.95567e+07	2.06269e+07	1.87796e+07	1.89014e+07	1.9898e+07	1.92665e+07	4.06666e+07	2.11341e+07	2.16041e+07	2.01732e+07	2.05499e+07	1.9786e+07	4.93627e+07	2.06004e+07	2.11755e+07	4.96925e+07	2.11183e+07	2.06525e+07	2.11707e+07	2.15758e+07	2.18029e+07	2.15315e+07	2.15974e+07	2.05417e+07	2.15286e+07	2.13098e+07	2.05558e+07	2.22342e+07	2.08324e+07	2.05162e+07	2.38185e+07	2.12205e+07	2.17082e+07	2.28355e+07	2.0885e+07	2.07114e+07
588	229.199	229.176	229.213	73.0694	69.0236	74.7461	104	36	12	31	9	16	0	4.21144e+06	4.01621e+06	3.95107e+06	1.58082e+07	1.63228e+07	1.74872e+07	1.09144e+06	2.29234e+06	1.89443e+06	6.85342e+06	6.84008e+06	7.21262e+06	4.65694e+06	4.14221e+06	4.38233e+06	1.43922e+06	1.26671e+06	1.27301e+06	1.38364e+07	1.41009e+07	1.36194e+07	2.54983e+06	2.42031e+06	2.53858e+06	1.21778e+06	2.22658e+06	2.26561e+06	1.32556e+06	1.24922e+06	1.29411e+06	2.7322e+06	2.60161e+06	2.6028e+06	3.46162e+06	3.5282e+06	3.44784e+06
589	229.155	229.154	229.155	389.437	385.509	390.219	64	15	15	11	6	10	7	6.07838e+06	5.26016e+06	5.50184e+06	6.08004e+06	6.14098e+06	6.7669e+06	2.80335e+06	4.5745e+06	3.38482e+06	5.6392e+06	5.35643e+06	5.49144e+06	4.03731e+06	4.14481e+06	4.35762e+06	4.63376e+06	5.4618e+06	5.29767e+06	4.95701e+06	4.44001e+06	4.18149e+06	3.85295e+06	3.96078e+06	3.67699e+06	2.00449e+06	3.34517e+06	3.25626e+06	5.05045e+06	4.99912e+06	5.00603e+06	4.25026e+06	3.9176e+06	3.84896e+06	4.902e+06	4.47565e+06	4.11085e+06
590	230.007	230.007	230.013	331.52	312.917	337.84	167	36	36	34	9	36	16	1.74931e+07	1.69145e+07	1.6277e+07	1.69876e+07	1.88631e+07	2.03329e+07	1.71095e+06	1.39108e+07	8.90631e+06	1.51593e+07	1.556e+07	1.55538e+07	7.74998e+06	1.22694e+07	1.54475e+07	1.03787e+07	1.98592e+07	2.00374e+07	2.15498e+07	2.08557e+07	2.04401e+07	2.08009e+07	2.05508e+07	1.97333e+07	3.67967e+06	1.75644e+07	1.33099e+07	2.25676e+07	2.27326e+07	2.41974e+07	1.85364e+07	1.9108e+07	1.86528e+07	1.96589e+07	1.97959e+07	2.02115e+07
591	230.079	230.065	230.194	373.348	371.352	376.033	167	36	36	34	9	36	16	1.09929e+07	1.28302e+07	1.34339e+07	1.12102e+07	1.32839e+07	1.3543e+07	1.18989e+06	1.12219e+07	1.27567e+07	9.92337e+06	1.17019e+07	1.20731e+07	7.85738e+06	9.26951e+06	1.38503e+07	7.63478e+06	1.0964e+07	1.34874e+07	1.75174e+07	2.3709e+07	2.73697e+07	1.39155e+07	1.85963e+07	2.1758e+07	8.6554e+06	1.3057e+07	1.3708e+07	1.43606e+07	1.87575e+07	2.10799e+07	1.31369e+07	1.73182e+07	2.07873e+07	1.31038e+07	1.63725e+07	2.04327e+07
592	230.163	230.159	230.168	428.84	427.639	430.367	128	28	31	22	4	30	13	813806	834175	846266	759123	904677	967347	491675	600089	529582	815616	894590	795955	794891	614608	671957	828006	851175	790039	654475	628454	568303	599349	545359	582195	323784	514860	436217	622430	686050	665869	577376	520565	521933	651604	549553	622207
593	230.245	230.046	230.248	185.882	147.557	216.779	117	22	25	27	6	29	6	313979	263052	300177	374369	402876	480618	5.7248e+06	501604	462626	836133	860201	916457	1.15602e+06	1.00128e+06	1.06141e+06	3.2594e+06	3.32141e+06	3.36767e+06	1.70392e+06	1.60849e+06	1.69349e+06	2.03921e+06	1.98284e+06	1.92695e+06	1.59072e+06	2.65771e+06	2.61201e+06	253893	235782	240309	1.11644e+06	1.10933e+06	1.06324e+06	215802	188044	180038
594	230.211	230.178	230.24	79.931	73.9226	96.2817	57	23	1	28	5	0	0	1.35042e+06	868592	1.22765e+06	1.35543e+06	1.43158e+06	1.54924e+06	825702	835804	744471	1.7826e+06	1.76446e+06	1.40036e+06	1.19695e+06	1.10066e+06	1.17469e+06	1.46947e+06	1.26603e+06	1.11834e+06	1.90774e+06	1.54037e+06	1.4592e+06	1.17625e+06	802158	851774	623332	921041	997815	840972	835610	1.00856e+06	807893	631603	662756	1.10977e+06	775290	1.01742e+06
595	231.022	231.019	231.023	418.342	415.602	419.878	158	33	35	33	9	33	15	9.36675e+06	8.94007e+06	9.11684e+06	9.54416e+06	8.78561e+06	8.90886e+06	117917	1.02981e+07	1.08617e+07	9.92083e+06	9.39576e+06	9.26504e+06	47537.4	1.03435e+07	9.83226e+06	46284	1.00346e+07	9.94124e+06	1.01734e+07	9.78926e+06	9.73753e+06	1.00677e+07	9.50987e+06	9.76489e+06	1.2688e+07	1.02069e+07	1.00097e+07	1.00619e+07	1.04407e+07	9.32452e+06	1.03072e+07	1.05703e+07	9.52503e+06	9.94608e+06	1.01233e+07	9.74455e+06
596	231.078	231.074	231.099	348.902	322.105	373.984	168	34	36	34	6	36	16	4.83676e+06	4.44134e+06	4.44188e+06	1.09416e+07	1.29498e+07	1.64486e+07	1.28939e+06	5.79678e+06	3.52247e+06	6.20788e+06	6.51244e+06	6.62881e+06	4.2434e+06	1.2075e+07	1.34848e+07	7.03242e+06	9.3206e+06	1.04323e+07	6.88816e+06	6.67383e+06	6.25437e+06	9.89239e+06	9.40389e+06	9.10022e+06	2.57502e+06	7.74712e+06	7.21794e+06	8.48143e+06	8.73311e+06	9.81371e+06	7.06341e+06	6.85333e+06	6.59251e+06	8.09085e+06	8.47061e+06	9.32592e+06
597	231.12	231.12	231.12	606.662	579.977	608.184	66	22	19	11	1	7	6	2.22799e+06	1.8336e+06	1.65905e+06	2.56733e+06	2.0569e+06	2.24628e+06	1.16796e+06	2.57263e+06	1.87195e+06	2.25082e+06	1.82924e+06	1.9186e+06	4.14052e+06	2.8104e+06	2.7938e+06	5.15458e+06	3.09216e+06	2.83599e+06	4.10573e+06	3.65534e+06	3.69157e+06	3.61592e+06	2.90286e+06	3.01066e+06	2.53495e+06	3.47996e+06	3.04352e+06	4.07353e+06	4.06291e+06	4.10994e+06	6.21272e+06	3.98725e+06	3.8567e+06	6.62459e+06	4.64333e+06	4.57672e+06
598	232.017	232.016	232.038	448.953	444.385	451.678	163	35	36	34	9	33	16	2.09297e+06	2.24613e+06	2.32884e+06	2.29049e+06	2.47991e+06	2.81771e+06	856069	2.50426e+06	2.31777e+06	1.42373e+06	1.89979e+06	2.04372e+06	2.18605e+06	2.5887e+06	2.81605e+06	2.20748e+06	2.6142e+06	2.71578e+06	3.66798e+06	3.9621e+06	3.83241e+06	3.51327e+06	3.72085e+06	3.655e+06	1.77494e+06	2.87704e+06	3.27064e+06	2.90254e+06	2.98691e+06	4.40022e+06	2.8952e+06	3.44522e+06	3.62353e+06	2.74579e+06	3.53278e+06	3.55185e+06
599	232.043	232.043	232.044	256.667	249.689	263.22	160	33	36	32	8	36	15	1.31936e+07	1.31928e+07	1.33925e+07	1.31663e+07	5.62204e+06	5.461e+06	98871.2	1.15133e+07	3.38141e+06	1.30494e+07	5.40112e+06	1.33513e+07	1.37264e+07	1.16521e+07	1.23492e+07	5.36786e+06	5.09801e+06	1.31266e+07	5.17985e+06	1.35103e+07	4.97681e+06	1.2973e+07	1.29457e+07	1.27738e+07	1.36724e+06	1.23913e+07	1.23894e+07	5.56703e+06	5.21447e+06	5.12402e+06	1.2747e+07	1.28852e+07	1.29774e+07	1.33804e+07	5.33122e+06	1.35678e+07
600	232.073	231.967	232.077	384.113	373.993	385.167	142	28	28	31	7	32	16	5.44854e+06	4.16736e+06	3.85642e+06	5.98779e+06	5.50532e+06	5.2618e+06	2.50605e+06	4.35506e+06	4.82475e+06	4.80763e+06	3.85059e+06	4.25228e+06	6.76775e+06	4.10984e+06	4.33821e+06	8.07351e+06	4.96156e+06	5.48763e+06	7.24853e+06	5.34019e+06	5.46463e+06	6.04456e+06	5.04348e+06	4.99982e+06	4.01476e+06	4.41639e+06	6.8935e+06	6.41767e+06	5.86588e+06	5.5976e+06	5.77459e+06	4.6931e+06	5.67987e+06	6.3177e+06	5.8717e+06	5.28277e+06
601	232.044	232.019	232.044	207.222	194.576	227.479	97	14	21	24	1	22	15	6.65782e+06	6.94113e+06	7.14425e+06	6.94623e+06	6.97371e+06	7.76323e+06	7.35422e+06	6.41548e+06	1.02888e+07	6.97083e+06	7.46913e+06	7.04797e+06	7.50347e+06	6.70826e+06	6.89757e+06	8.562e+06	7.53642e+06	6.77687e+06	8.22765e+06	7.03671e+06	7.05345e+06	6.90903e+06	6.9932e+06	6.99473e+06	7.53825e+06	7.02536e+06	6.97262e+06	7.86767e+06	7.22783e+06	7.40734e+06	6.94977e+06	7.16055e+06	7.08789e+06	7.13235e+06	7.15215e+06	7.07903e+06
602	232.136	232.132	232.138	540.296	539.763	541.795	42	0	9	18	0	15	0	2.6235e+06	2.75338e+06	3.20149e+06	2.47111e+06	2.76597e+06	3.01896e+06	2.31418e+06	3.5609e+06	3.3986e+06	2.60072e+06	2.90029e+06	3.11399e+06	2.13701e+06	2.84033e+06	3.14946e+06	2.64289e+06	3.49e+06	3.71348e+06	2.79591e+06	2.916e+06	3.27182e+06	2.96663e+06	3.02504e+06	3.34692e+06	2.92183e+06	4.20465e+06	4.35402e+06	2.51014e+06	2.8715e+06	3.00368e+06	3.80579e+06	3.7514e+06	3.91771e+06	3.32754e+06	3.5602e+06	3.58715e+06
603	232.153	232.151	232.154	338.388	335.457	344.908	167	36	36	34	9	36	16	4.29058e+07	4.1736e+07	4.0882e+07	4.25677e+07	4.86942e+07	5.37287e+07	1.19608e+07	3.81336e+07	2.91065e+07	3.90324e+07	4.09761e+07	4.30671e+07	4.03438e+07	3.71324e+07	4.38946e+07	4.44858e+07	4.79276e+07	4.76108e+07	5.815e+07	5.52272e+07	5.44626e+07	5.01877e+07	5.08427e+07	5.05083e+07	1.87161e+07	4.54124e+07	4.24221e+07	5.78469e+07	6.15389e+07	6.39799e+07	4.8808e+07	5.09061e+07	5.11783e+07	5.37634e+07	5.44781e+07	5.54141e+07
604	233.009	233.006	233.042	55.3908	51.7533	56.7252	167	36	36	34	9	36	16	3.31231e+06	3.24169e+06	3.19358e+06	3.12597e+06	3.27299e+06	3.31044e+06	2.24422e+06	2.9893e+06	2.82637e+06	3.15037e+06	3.20919e+06	3.22786e+06	3.33924e+06	2.93406e+06	3.09886e+06	3.2526e+06	3.0401e+06	3.09723e+06	3.0609e+06	3.11827e+06	3.0999e+06	2.93909e+06	3.05486e+06	2.96574e+06	2.18214e+06	2.84057e+06	2.71403e+06	3.28984e+06	3.28089e+06	3.33861e+06	3.12305e+06	3.13255e+06	3.00991e+06	3.1207e+06	3.13662e+06	3.10571e+06
605	233.084	233.077	233.106	102.793	100.189	105.477	103	16	29	20	3	34	1	1.20395e+06	1.24713e+06	1.32774e+06	1.6536e+06	1.80575e+06	1.9259e+06	1.34877e+06	1.81525e+06	1.56874e+06	1.70083e+06	1.73346e+06	1.66618e+06	1.50312e+06	1.49766e+06	1.53444e+06	4.46648e+06	4.4512e+06	4.53764e+06	3.57777e+06	3.67683e+06	3.87702e+06	2.5063e+06	2.71684e+06	2.69238e+06	2.95071e+06	4.92044e+06	4.84371e+06	1.24757e+06	1.2885e+06	1.4193e+06	2.26123e+06	2.30105e+06	2.36027e+06	951425	900219	918369
606	233.068	233.066	233.079	369.501	365.105	388.835	90	15	24	17	1	21	12	1.85891e+07	1.82214e+07	1.83038e+07	1.70528e+07	1.77131e+07	1.86769e+07	4.21662e+06	1.22168e+07	1.10144e+07	1.54893e+07	1.5565e+07	1.58774e+07	1.00311e+07	1.17626e+07	1.26767e+07	9.17409e+06	1.21843e+07	1.35504e+07	1.5939e+07	1.62224e+07	1.62158e+07	1.47609e+07	1.5007e+07	1.46172e+07	2.74635e+06	1.28226e+07	1.16487e+07	1.55335e+07	1.65041e+07	1.64718e+07	1.29288e+07	1.34029e+07	1.41201e+07	1.31965e+07	1.38849e+07	1.46781e+07
607	233.069	233.064	233.106	343.249	340.628	352.532	81	22	12	18	9	15	5	1.93067e+07	1.97468e+07	2.0894e+07	1.89928e+07	2.05618e+07	2.21696e+07	3.44436e+06	1.23632e+07	1.07858e+07	1.81175e+07	1.92251e+07	1.95221e+07	8.63534e+06	1.18654e+07	1.29569e+07	1.07602e+07	1.22038e+07	1.33627e+07	2.07914e+07	2.13545e+07	1.60979e+07	1.45935e+07	1.51779e+07	1.43105e+07	4.72527e+06	1.2807e+07	1.12738e+07	1.52077e+07	1.68791e+07	1.645e+07	1.26247e+07	1.35197e+07	1.39949e+07	1.38097e+07	1.39894e+07	1.43843e+07
608	234.041	233.915	234.054	370.112	333.044	372.569	168	36	36	34	9	36	16	7.38083e+06	9.89433e+06	1.01012e+07	7.16753e+06	1.03949e+07	1.19394e+07	2.52375e+06	7.88496e+06	8.00363e+06	6.1088e+06	8.6898e+06	1.00594e+07	2.77898e+06	8.06792e+06	9.60115e+06	2.90376e+06	1.0522e+07	1.2478e+07	8.66677e+06	1.11726e+07	1.28846e+07	9.12438e+06	1.16665e+07	1.25e+07	4.02867e+06	1.00462e+07	9.19862e+06	9.06073e+06	1.25126e+07	1.37023e+07	7.4162e+06	9.66955e+06	1.13296e+07	6.80099e+06	1.06172e+07	1.15318e+07
609	234.16	234.159	234.177	337.357	335.989	343.421	75	10	15	18	6	15	11	214161	132125	132430	257351	240221	146717	67935.2	174947	122917	181145	196094	157234	162186	168237	148945	221704	176801	192734	242918	246366	133631	200815	180452	203346	115296	195133	162056	244783	286255	289374	235250	187067	201638	282006	303134	219176
610	234.917	234.917	234.918	386.087	385.442	386.575	167	36	36	34	9	36	16	2.31427e+08	2.94245e+08	3.29923e+08	2.32608e+08	2.62778e+08	2.48568e+08	1.25014e+08	2.67744e+08	2.64121e+08	2.50654e+08	3.0001e+08	3.26504e+08	3.4666e+08	2.87676e+08	3.24969e+08	3.43826e+08	2.64375e+08	3.04768e+08	2.22182e+08	2.81062e+08	3.20917e+08	2.72986e+08	3.13097e+08	3.4303e+08	1.54602e+08	3.07254e+08	3.22734e+08	1.91893e+08	2.38502e+08	2.51503e+08	2.28142e+08	2.9001e+08	3.20188e+08	1.93598e+08	2.61798e+08	3.06735e+08
611	235.119	235.117	235.12	183.913	183.004	186.987	158	34	35	34	3	36	16	3.20349e+06	3.18292e+06	3.07667e+06	3.39e+06	3.61204e+06	3.95136e+06	1.7188e+06	2.39927e+06	2.04335e+06	3.21827e+06	3.12261e+06	3.15469e+06	2.53198e+06	2.41544e+06	2.53947e+06	2.68279e+06	2.91272e+06	2.79015e+06	3.51788e+06	3.44605e+06	3.46212e+06	3.46447e+06	3.4615e+06	3.40698e+06	1.7441e+06	3.12201e+06	3.0665e+06	3.63236e+06	3.68485e+06	3.80896e+06	3.00743e+06	2.99419e+06	2.90857e+06	3.20426e+06	3.2493e+06	3.2101e+06
612	235.093	235.032	235.094	491.613	488.506	493.598	57	6	25	4	0	17	5	950976	903650	895490	980283	1.13462e+06	1.21877e+06	371700	616663	491401	854716	894316	906456	761926	605215	694135	813682	785489	767970	1.15869e+06	1.1482e+06	1.12441e+06	1.31419e+06	1.80718e+06	1.27217e+06	309262	739132	731783	1.39621e+06	1.44315e+06	1.45685e+06	753956	828592	820861	877443	949313	933729
613	235.164	235.15	235.165	354.519	352.253	360.84	167	36	36	34	9	36	16	2.78883e+07	2.54291e+07	2.57714e+07	2.49801e+07	3.87809e+07	7.28223e+07	4.35583e+06	2.24537e+07	1.66673e+07	2.22699e+07	1.84641e+07	1.47167e+07	5.69566e+07	2.953e+07	3.5734e+07	6.47686e+07	3.35327e+07	2.66129e+07	6.48147e+07	5.56608e+07	6.04132e+07	6.48369e+07	7.11425e+07	6.39325e+07	4.33784e+06	5.31718e+07	4.27219e+07	7.00448e+07	5.70596e+07	5.31464e+07	3.19927e+07	3.29358e+07	3.52889e+07	3.07985e+07	3.56981e+07	2.98808e+07
614	236.04	236.009	236.055	324.561	311.855	329.457	167	36	36	34	9	36	16	4.92731e+06	4.29593e+06	3.58217e+06	4.30325e+06	4.33969e+06	4.76098e+06	2.05509e+06	3.71421e+06	2.96794e+06	4.21059e+06	4.06338e+06	3.77802e+06	4.20556e+06	3.18662e+06	4.14974e+06	5.70627e+06	4.34211e+06	4.65494e+06	4.58534e+06	4.62393e+06	4.65726e+06	4.44765e+06	4.34105e+06	4.41362e+06	2.24149e+06	4.28239e+06	2.22096e+06	4.83375e+06	5.08929e+06	5.15107e+06	4.90844e+06	4.55685e+06	4.48743e+06	5.03005e+06	4.48965e+06	4.5345e+06
615	236.149	236.148	236.149	531.303	529.435	532.603	139	31	27	29	9	29	14	4.59813e+06	4.73476e+06	5.01237e+06	4.83329e+06	4.81979e+06	4.88911e+06	118103	4.58712e+06	4.6478e+06	8.55157e+06	4.6692e+06	4.65692e+06	98377.7	4.65311e+06	5.03763e+06	106150	4.81124e+06	4.97553e+06	4.55199e+06	5.0245e+06	4.88982e+06	4.77019e+06	4.60344e+06	4.78634e+06	3.3904e+06	4.80242e+06	4.71294e+06	4.97958e+06	5.16398e+06	4.86689e+06	8.27943e+06	5.15532e+06	4.64785e+06	4.34424e+06	4.74508e+06	5.27177e+06
616	236.149	235.992	236.149	499.996	496.114	502.352	69	14	12	26	2	10	5	3.83395e+06	3.88152e+06	4.05992e+06	3.69979e+06	3.90623e+06	4.25667e+06	224957	3.58849e+06	3.56089e+06	3.65813e+06	3.81457e+06	3.87832e+06	254638	3.47598e+06	3.7683e+06	281534	3.72989e+06	3.96825e+06	3.79996e+06	3.8696e+06	3.94559e+06	3.91383e+06	3.72693e+06	3.85748e+06	6.6317e+06	3.57911e+06	3.85598e+06	3.79542e+06	3.91833e+06	4.18257e+06	3.43852e+06	3.82264e+06	3.86258e+06	8.37017e+06	3.95263e+06	3.87612e+06
617	236.153	236.148	236.168	367.724	354.007	373.851	167	35	36	35	9	36	16	1.35281e+07	1.47059e+07	1.57676e+07	1.2601e+07	1.57904e+07	1.93377e+07	950625	1.40761e+07	1.2536e+07	1.2363e+07	1.37719e+07	1.38853e+07	5.75878e+06	1.6108e+07	1.69639e+07	6.8008e+06	1.72354e+07	1.5863e+07	1.8379e+07	1.87065e+07	2.1158e+07	2.04385e+07	2.26066e+07	2.20163e+07	9.3103e+06	2.04615e+07	1.7999e+07	1.78544e+07	1.86761e+07	1.84603e+07	1.42411e+07	1.60709e+07	1.70432e+07	1.30494e+07	1.63095e+07	1.59862e+07
618	236.915	236.915	236.916	386.103	385.442	386.803	167	36	36	34	9	36	16	4.91736e+07	6.29977e+07	7.03544e+07	4.92612e+07	5.60332e+07	5.31794e+07	2.69334e+07	5.75885e+07	5.64001e+07	5.3072e+07	6.39451e+07	7.03818e+07	7.42459e+07	6.13106e+07	6.99841e+07	7.31345e+07	5.7275e+07	6.57418e+07	4.76157e+07	6.02554e+07	6.87895e+07	5.85528e+07	6.74706e+07	7.32394e+07	3.33411e+07	6.45006e+07	6.89627e+07	3.98543e+07	5.03201e+07	5.30131e+07	4.87671e+07	6.26084e+07	6.89618e+07	4.12084e+07	5.52595e+07	6.57997e+07
619	236.987	236.985	236.994	501.306	496.685	503.693	167	36	36	34	9	36	16	3.66148e+06	3.53532e+06	3.48484e+06	3.63791e+06	3.85296e+06	3.65485e+06	4.29561e+06	3.25744e+06	3.24865e+06	3.62014e+06	3.63029e+06	3.52498e+06	5.83294e+06	3.42686e+06	3.46006e+06	5.84224e+06	3.57464e+06	3.5973e+06	3.76391e+06	3.7614e+06	3.55009e+06	3.5939e+06	3.5515e+06	3.49134e+06	2.80509e+06	3.39453e+06	3.39138e+06	3.6865e+06	3.77552e+06	3.70229e+06	3.59436e+06	3.47289e+06	3.40588e+06	3.68185e+06	3.61568e+06	3.53808e+06
620	237.088	237.085	237.09	330.016	319.759	336.593	147	31	34	31	1	35	15	2.64511e+06	2.82515e+06	3.15673e+06	2.34318e+06	3.16543e+06	3.6326e+06	219333	1.94522e+06	1.63984e+06	2.11842e+06	3.04135e+06	2.62193e+06	2.80087e+06	1.98913e+06	2.80408e+06	3.61725e+06	3.0287e+06	3.20785e+06	2.654e+06	2.77511e+06	2.89979e+06	2.71327e+06	2.85262e+06	3.55868e+06	849730	3.08531e+06	2.48062e+06	2.92191e+06	3.55171e+06	4.06245e+06	2.49995e+06	3.03456e+06	3.1096e+06	2.35092e+06	2.93863e+06	3.10722e+06
621	237.145	237.136	237.17	188.741	183.27	192.653	167	36	36	34	9	36	16	4.39804e+06	4.20301e+06	4.14337e+06	4.47039e+06	4.67083e+06	5.03178e+06	1.56751e+06	3.86922e+06	3.23728e+06	4.15868e+06	4.33355e+06	4.23186e+06	4.12678e+06	3.87023e+06	4.32689e+06	4.46045e+06	4.72833e+06	4.64833e+06	3.79873e+06	3.68669e+06	3.66965e+06	3.29598e+06	3.30371e+06	3.27789e+06	1.81704e+06	3.50776e+06	3.41355e+06	3.48106e+06	3.49958e+06	3.63636e+06	3.48613e+06	3.54988e+06	3.58045e+06	3.7087e+06	3.6201e+06	3.6927e+06
622	237.17	237.167	237.173	78.3086	76.7881	80.0754	56	26	0	23	6	1	0	1.31404e+06	1.2653e+06	1.28739e+06	1.86395e+06	2.00231e+06	2.07781e+06	501761	1.66775e+06	1.41642e+06	1.6824e+06	1.66211e+06	1.76004e+06	733459	1.11963e+06	1.12856e+06	3.9627e+06	4.24975e+06	4.22489e+06	3.16467e+06	3.22211e+06	3.2419e+06	2.8067e+06	2.57191e+06	2.57208e+06	2.8018e+06	4.61541e+06	4.70628e+06	1.62682e+06	1.41807e+06	1.5348e+06	2.21523e+06	2.20109e+06	2.1917e+06	1.01314e+06	1.14578e+06	1.12104e+06
623	237.979	237.978	237.979	656.099	652.794	660.26	111	27	23	19	6	26	10	7.90048e+06	9.81485e+06	1.01361e+07	8.24123e+06	1.00097e+07	1.01368e+07	4.8078e+06	8.4604e+06	9.59976e+06	8.62627e+06	1.06902e+07	1.11045e+07	3.5434e+06	9.5212e+06	9.94276e+06	2.28443e+06	9.26816e+06	1.01369e+07	9.74567e+06	1.08701e+07	1.05168e+07	1.01951e+07	1.04866e+07	1.06996e+07	3.40804e+06	1.02711e+07	1.04684e+07	1.0314e+07	1.11405e+07	1.1278e+07	3.89725e+06	1.06664e+07	1.09488e+07	4.62134e+06	1.02147e+07	1.10229e+07
624	237.934	237.918	238.092	386.658	360.685	388.391	167	36	36	34	9	36	16	2.61176e+06	3.34293e+06	3.60345e+06	3.10035e+06	3.04723e+06	3.0939e+06	2.6064e+06	2.97262e+06	3.14282e+06	2.90797e+06	3.24427e+06	3.90283e+06	4.23951e+06	3.17363e+06	3.60652e+06	4.61028e+06	3.04392e+06	3.43893e+06	2.03372e+06	3.13481e+06	3.77678e+06	3.05532e+06	3.63497e+06	3.88768e+06	1.99249e+06	3.40754e+06	2.95691e+06	3.31151e+06	2.12771e+06	2.20354e+06	2.61058e+06	3.373e+06	3.6343e+06	2.23776e+06	3.00835e+06	3.34116e+06
625	238.108	238.05	238.112	180.412	165.512	184.718	106	27	19	32	0	17	11	4.15987e+06	3.81582e+06	3.73841e+06	4.40547e+06	5.07988e+06	6.09142e+06	2.54392e+06	844435	661536	4.20582e+06	4.3232e+06	4.59701e+06	2.31914e+06	1.14541e+06	1.65096e+06	2.41859e+06	1.72707e+06	1.75432e+06	1.05834e+06	966959	1.04113e+06	2.53919e+06	2.71901e+06	2.51183e+06	1.09656e+06	610412	643369	2.00825e+06	2.34429e+06	2.43531e+06	591534	570133	537013	965049	1.12682e+06	1.04368e+06
626	238.075	238.074	238.08	232.13	224.508	234.694	87	14	19	19	0	21	14	2.06162e+06	2.45035e+06	3.10131e+06	1.97686e+06	2.70296e+06	4.0468e+06	252613	413044	456161	2.30882e+06	3.03775e+06	3.91605e+06	376963	589495	1.14909e+06	394177	694483	1.14078e+06	265677	497584	501534	408538	879958	865031	244028	200491	297435	697516	1.5933e+06	1.54004e+06	182873	198015	252740	288626	378713	477512
627	238.163	238.086	238.182	97.5832	72.0475	128.573	144	27	28	28	9	27	14	973134	979597	907802	1.10304e+06	1.0042e+06	1.13351e+06	5.00566e+06	1.84846e+06	2.16318e+06	753654	1.09587e+06	1.07296e+06	2.68644e+06	2.86619e+06	2.9463e+06	8.27363e+06	7.42684e+06	7.57057e+06	7.73559e+06	7.25579e+06	7.61781e+06	4.42044e+06	4.30231e+06	4.25737e+06	5.08458e+06	5.83934e+06	5.7464e+06	1.08414e+06	1.20491e+06	1.1773e+06	2.05421e+06	1.68052e+06	3.3525e+06	2.11771e+06	2.41328e+06	2.26107e+06
628	238.926	238.918	238.962	385.497	382.937	386.024	167	36	36	34	9	36	16	3.77153e+06	4.70589e+06	5.92165e+06	3.98274e+06	4.37638e+06	4.49994e+06	2.39185e+06	4.91709e+06	4.9486e+06	4.0769e+06	4.88017e+06	5.1433e+06	8.84168e+06	5.66919e+06	6.64513e+06	9.13696e+06	4.95799e+06	5.69186e+06	4.476e+06	5.48713e+06	6.55338e+06	5.59338e+06	6.21475e+06	7.01117e+06	3.05595e+06	6.87888e+06	6.73427e+06	3.86779e+06	4.56181e+06	4.66647e+06	5.13419e+06	6.30853e+06	6.57101e+06	3.58995e+06	4.83309e+06	6.22283e+06
629	239.149	239.144	239.149	101.211	98.5489	103.219	154	26	36	31	9	36	16	5.63035e+06	6.03192e+06	6.30907e+06	8.77387e+07	9.57286e+07	1.08956e+08	3.12179e+06	7.8545e+06	6.84725e+06	1.79807e+07	1.9423e+07	2.11598e+07	4.28616e+07	3.68361e+07	4.12528e+07	6.20638e+07	6.09378e+07	6.26853e+07	1.28757e+08	1.24906e+08	1.26128e+08	3.48753e+07	3.42358e+07	3.52861e+07	1.6981e+07	3.87282e+07	3.37134e+07	6.12555e+06	6.40312e+06	7.12877e+06	4.07362e+07	4.09643e+07	4.2239e+07	1.00785e+07	7.33329e+06	7.69554e+06
630	239.197	239.165	239.217	70.3803	66.2895	72.4685	84	22	20	11	6	18	7	538697	524941	552544	538527	591828	606978	275515	467209	430131	639771	642187	633033	90153.6	135362	138768	634768	576665	604807	435209	413218	447314	572386	513989	545273	425315	674075	642495	747991	767546	730652	235158	199773	181519	463849	452018	436839
631	240.011	240.011	240.022	633.949	632.089	638.481	132	28	28	27	9	28	12	5.05894e+06	6.83948e+06	6.45381e+06	5.39183e+06	7.18484e+06	8.26659e+06	2.33461e+06	4.57169e+06	3.95409e+06	5.66022e+06	6.96279e+06	7.32955e+06	2.03889e+06	5.39429e+06	6.42774e+06	2.05672e+06	6.33452e+06	6.68704e+06	7.07713e+06	8.40176e+06	8.48927e+06	6.6127e+06	7.37782e+06	7.81801e+06	1.54095e+06	6.91199e+06	7.01656e+06	7.50261e+06	9.08565e+06	9.07376e+06	2.03796e+06	7.33859e+06	7.73556e+06	2.70096e+06	8.44666e+06	8.47889e+06
632	240.115	240.108	240.129	66.6365	63.433	77.6249	89	0	36	1	0	36	16	6.15333e+06	6.29882e+06	6.06279e+06	6.22588e+06	6.5908e+06	6.66876e+06	5.41713e+06	5.90986e+06	5.75139e+06	6.75013e+06	6.89828e+06	6.93307e+06	5.43311e+06	5.28856e+06	5.81858e+06	7.59479e+06	7.18164e+06	7.4373e+06	7.08889e+06	7.04004e+06	7.12543e+06	6.38385e+06	6.24477e+06	6.39168e+06	7.43208e+06	9.00271e+06	8.54118e+06	6.89699e+06	6.94316e+06	7.02166e+06	6.87357e+06	6.29831e+06	6.39102e+06	5.93692e+06	5.49515e+06	5.54884e+06
633	240.1	239.93	240.104	368.47	367.418	386.517	38	19	1	9	2	5	2	2.58634e+06	2.18695e+06	1.97684e+06	2.51749e+06	2.14453e+06	2.41997e+06	1.32288e+06	2.05011e+06	1.41961e+06	2.44002e+06	1.92776e+06	1.86731e+06	3.94145e+06	2.02762e+06	2.07577e+06	4.44883e+06	2.91473e+06	2.58514e+06	2.75797e+06	2.55878e+06	2.62041e+06	2.71352e+06	2.50913e+06	2.59838e+06	1.52268e+06	2.62282e+06	2.50064e+06	2.79977e+06	2.65508e+06	2.5597e+06	3.07075e+06	2.47704e+06	211455	3.23461e+06	2.5895e+06	2.16405e+06
634	240.154	240.153	240.184	101.143	72.7737	103.683	98	4	36	6	0	36	16	7.18524e+06	6.97313e+06	7.05162e+06	1.15022e+07	1.20461e+07	1.26423e+07	7.0353e+06	7.11555e+06	7.03042e+06	7.06218e+06	7.22666e+06	7.22027e+06	8.95833e+06	8.04698e+06	8.36398e+06	1.06911e+07	1.01516e+07	1.02132e+07	1.43801e+07	1.4257e+07	1.43432e+07	8.12282e+06	7.8086e+06	7.5593e+06	8.3685e+06	8.8615e+06	8.45966e+06	7.04045e+06	6.66514e+06	6.94782e+06	9.18812e+06	8.66704e+06	8.53725e+06	8.08672e+06	7.16219e+06	7.02883e+06
635	240.968	240.968	240.97	407.671	406.947	408.362	167	36	36	34	9	36	16	3.20757e+07	2.98232e+07	2.92841e+07	3.10397e+07	3.16427e+07	2.91059e+07	2.69812e+07	3.01409e+07	2.95345e+07	3.07411e+07	3.02351e+07	2.87392e+07	3.45689e+07	3.04282e+07	3.01382e+07	3.55637e+07	3.15238e+07	3.1823e+07	3.08576e+07	3.03723e+07	3.08947e+07	3.10413e+07	3.01896e+07	3.02813e+07	2.88652e+07	3.09209e+07	3.11281e+07	3.15315e+07	3.01064e+07	3.06691e+07	3.42234e+07	3.1738e+07	3.22226e+07	3.30683e+07	3.06037e+07	3.23044e+07
636	240.907	240.906	240.908	501.723	498.563	504.499	165	35	36	34	9	36	15	1.66308e+06	1.71327e+06	1.64983e+06	1.61241e+06	1.70125e+06	1.63323e+06	1.8936e+06	1.69254e+06	1.59306e+06	1.63094e+06	1.77645e+06	1.71095e+06	1.93944e+06	1.58078e+06	1.70955e+06	2.05699e+06	1.7116e+06	1.74805e+06	1.66096e+06	1.68525e+06	1.6561e+06	1.68224e+06	1.52615e+06	1.69893e+06	1.46647e+06	1.75489e+06	1.68621e+06	1.6671e+06	1.73775e+06	1.6637e+06	1.66559e+06	1.67835e+06	1.64407e+06	1.6132e+06	1.78481e+06	1.68188e+06
637	241.031	241.031	241.035	531.333	528.699	534.193	167	36	36	34	9	36	16	4.43747e+07	4.3492e+07	4.31272e+07	5.76768e+07	6.38247e+07	7.09356e+07	3.31522e+07	1.33801e+08	9.76234e+07	4.15666e+07	4.27284e+07	4.3341e+07	1.17428e+08	1.32402e+08	1.4709e+08	1.20762e+08	1.52201e+08	1.46666e+08	1.2717e+08	1.20623e+08	1.15422e+08	1.11499e+08	1.06744e+08	1.00974e+08	4.22796e+07	1.4001e+08	1.33121e+08	1.11426e+08	1.11209e+08	1.09813e+08	1.41729e+08	1.59945e+08	1.55789e+08	1.72024e+08	1.86561e+08	1.83269e+08
638	241.079	241.071	241.08	370.618	367.505	374.292	167	36	36	34	9	36	16	2.0997e+08	2.28181e+08	2.06463e+08	1.59475e+08	1.91126e+08	2.10302e+08	8.62492e+06	2.17548e+07	1.73367e+07	1.47046e+08	1.6903e+08	1.76281e+08	2.58331e+07	3.33174e+07	3.37223e+07	2.64128e+07	3.43164e+07	3.28031e+07	1.98356e+07	1.97009e+07	2.10129e+07	2.57495e+07	2.64491e+07	2.51674e+07	6.68763e+06	1.19188e+07	1.36433e+07	3.7225e+07	4.03983e+07	4.1791e+07	1.23302e+07	1.22798e+07	1.26663e+07	1.56433e+07	1.58505e+07	1.58341e+07
639	241.049	241.049	241.049	655.2	652.25	657.509	96	25	11	28	3	23	6	4.3086e+07	4.08384e+07	4.16355e+07	4.33457e+07	4.24274e+07	4.28633e+07	5.93062e+07	3.87788e+07	3.68843e+07	4.45421e+07	4.24961e+07	4.25496e+07	6.45409e+07	4.26936e+07	4.08941e+07	6.21786e+07	4.18967e+07	4.02032e+07	4.6531e+07	4.42402e+07	4.52502e+07	4.50094e+07	4.31193e+07	4.33202e+07	3.94707e+07	4.2894e+07	4.2419e+07	4.85413e+07	4.60028e+07	4.64199e+07	4.46551e+07	4.45887e+07	4.29636e+07	4.73466e+07	4.57566e+07	4.52426e+07
640	241.086	241.086	241.157	122.387	99.5227	128.127	159	29	35	34	9	36	16	8.67695e+06	9.31214e+06	9.42186e+06	8.87779e+06	8.56574e+06	8.32564e+06	2.2742e+07	1.07796e+07	1.21918e+07	9.60437e+06	9.74334e+06	9.90292e+06	1.63021e+07	1.13087e+07	1.08866e+07	1.49213e+07	9.53414e+06	9.51526e+06	9.01602e+06	9.51105e+06	9.64005e+06	9.22039e+06	9.27991e+06	9.54672e+06	1.38829e+07	1.0276e+07	1.08572e+07	8.25297e+06	8.417e+06	7.9926e+06	9.55189e+06	1.00491e+07	9.78093e+06	8.9405e+06	9.69973e+06	9.38442e+06
641	242.035	242.033	242.038	531.566	529.721	534.419	167	36	36	34	9	36	16	2.35322e+06	2.28855e+06	2.49618e+06	3.26788e+06	3.39287e+06	3.81156e+06	1.62117e+06	7.45806e+06	5.48615e+06	2.26121e+06	2.23751e+06	2.38437e+06	6.24594e+06	7.67687e+06	8.0744e+06	6.78374e+06	8.16905e+06	8.23987e+06	7.0419e+06	6.55075e+06	6.35963e+06	6.22077e+06	5.83841e+06	5.50931e+06	2.39144e+06	7.75151e+06	7.04306e+06	6.37225e+06	6.14395e+06	6.03342e+06	7.90277e+06	8.92275e+06	8.85066e+06	9.78653e+06	1.02975e+07	9.98236e+06
642	242.066	242.016	242.082	382.665	376.557	386.633	167	36	36	34	9	36	16	3.78192e+07	3.70243e+07	3.22704e+07	3.26286e+07	3.48223e+07	3.62887e+07	931685	1.14363e+07	6.53067e+06	3.06933e+07	3.12972e+07	3.13652e+07	1.08994e+07	1.14435e+07	1.17292e+07	1.50616e+07	1.54252e+07	1.33409e+07	1.66237e+07	1.23924e+07	9.71371e+06	1.51117e+07	1.20708e+07	9.42783e+06	1.8895e+06	8.3846e+06	6.47653e+06	2.11377e+07	1.90356e+07	1.71551e+07	1.35266e+07	1.02385e+07	8.21353e+06	1.72408e+07	1.42506e+07	1.14662e+07
643	242.1	242.1	242.111	300.17	285.113	302.046	168	36	36	35	9	36	16	2.5732e+08	2.52248e+08	2.47816e+08	2.53353e+08	2.65481e+08	1.96885e+08	8.99693e+07	2.16814e+08	1.74378e+08	2.56052e+08	2.61171e+08	2.56794e+08	2.05711e+08	2.10982e+08	2.26323e+08	2.50321e+08	2.56314e+08	2.54612e+08	2.23572e+08	2.16863e+08	2.15759e+08	2.14575e+08	2.10375e+08	2.05512e+08	1.06163e+08	1.96069e+08	1.71776e+08	2.15106e+08	2.35374e+08	2.35498e+08	2.04336e+08	2.02846e+08	1.9989e+08	2.18498e+08	2.22499e+08	2.18086e+08
644	242.142	242.138	242.15	76.0961	75.4742	76.761	78	35	0	34	9	0	0	8.83724e+06	8.43612e+06	8.37623e+06	9.15898e+06	9.37099e+06	1.04758e+07	3.44095e+06	7.77202e+06	6.32179e+06	9.05734e+06	9.00531e+06	9.18979e+06	8.80658e+06	7.58585e+06	7.93949e+06	1.00792e+07	9.39178e+06	9.51384e+06	9.10313e+06	8.82619e+06	8.79356e+06	8.58457e+06	8.43052e+06	8.36071e+06	4.82647e+06	8.6555e+06	8.71322e+06	9.26222e+06	9.29786e+06	9.79954e+06	8.02006e+06	7.9157e+06	8.0978e+06	9.1143e+06	8.62965e+06	8.96871e+06
645	243.027	243.026	243.027	531.58	529.801	534.474	167	36	36	34	9	36	16	3.66544e+06	3.36271e+06	3.40303e+06	4.87416e+06	5.40811e+06	5.77788e+06	2.58983e+06	1.09631e+07	8.16626e+06	3.33299e+06	3.55855e+06	3.31318e+06	9.93054e+06	1.08653e+07	1.20733e+07	9.88084e+06	1.24832e+07	1.22756e+07	1.02663e+07	9.92012e+06	9.4156e+06	8.97801e+06	8.65114e+06	8.34475e+06	3.44253e+06	1.13519e+07	1.08991e+07	9.01011e+06	9.22869e+06	9.14885e+06	1.1546e+07	1.33611e+07	1.29886e+07	1.39903e+07	1.538e+07	1.49884e+07
646	243.058	243.054	243.07	344.462	342.709	351.452	153	33	36	29	9	31	15	1.93998e+07	1.21756e+07	1.09029e+07	1.59189e+07	1.12097e+07	1.23541e+07	1.23048e+06	1.44475e+07	5.51859e+06	1.45958e+07	9.43964e+06	9.35422e+06	1.04332e+07	1.33153e+07	1.05614e+07	1.42122e+07	1.2285e+07	1.24622e+07	1.42522e+07	1.31458e+07	1.2756e+07	1.62712e+07	1.64359e+07	1.64294e+07	2.03151e+06	1.59049e+07	6.82564e+06	1.18268e+07	1.29617e+07	1.25878e+07	1.93527e+07	1.85597e+07	1.82234e+07	1.79652e+07	1.20756e+07	1.1974e+07
647	243.151	243.107	243.182	305.146	284.848	324.348	168	36	36	34	9	36	16	7.02919e+07	6.67315e+07	7.3277e+07	6.40531e+07	7.94956e+07	8.42858e+07	653678	3.75619e+07	2.72257e+07	6.00423e+07	7.46519e+07	6.93049e+07	4.55048e+07	3.42904e+07	4.32148e+07	5.66105e+07	5.23456e+07	5.77142e+07	5.53797e+07	5.44921e+07	5.57864e+07	4.55062e+07	4.6165e+07	4.7135e+07	1.11347e+07	3.70058e+07	3.14597e+07	5.72318e+07	6.20627e+07	6.75482e+07	4.06889e+07	4.2067e+07	4.23318e+07	4.92858e+07	4.55116e+07	4.92681e+07
648	243.182	243.16	243.183	107.694	105.197	129.029	47	12	6	6	3	4	16	259917	163946	256856	1.32268e+06	1.28919e+06	1.344e+06	570175	1.4474e+06	1.23464e+06	5.75008e+07	5.6621e+07	5.63578e+07	203568	292558	401487	601231	1.10182e+06	1.16548e+06	180747	252052	312446	194547	292998	190815	3.17351e+06	9.73335e+06	9.03138e+06	117422	96305.3	181471	214154	215548	187104	4.0068e+06	4.06722e+06	3.74373e+06
649	244.089	244.079	244.133	374.009	373.008	377.492	167	36	36	34	9	36	16	1.59668e+07	1.7866e+07	2.08499e+07	2.02717e+07	1.85143e+07	1.79566e+07	2.31358e+07	2.80245e+07	2.87264e+07	2.35211e+07	2.29671e+07	2.35795e+07	2.37578e+07	2.85974e+07	2.90487e+07	2.0806e+07	2.67007e+07	2.7481e+07	3.02863e+07	3.26202e+07	3.29509e+07	2.87887e+07	3.20687e+07	3.15801e+07	2.40474e+07	3.04373e+07	3.01253e+07	2.66112e+07	2.75712e+07	2.6921e+07	2.80184e+07	2.99887e+07	3.21349e+07	2.63158e+07	2.78639e+07	2.98715e+07
650	244.079	244.079	244.085	329.397	325.212	334.938	167	36	36	34	9	36	16	1.57994e+08	1.49823e+08	1.42972e+08	1.41495e+08	1.5011e+08	1.67082e+08	7.65915e+06	4.56075e+07	3.29721e+07	8.8277e+07	8.64886e+07	8.97878e+07	5.69079e+07	4.71723e+07	5.5234e+07	5.86168e+07	6.06202e+07	6.01629e+07	6.21572e+07	5.95771e+07	5.91861e+07	5.88464e+07	5.88266e+07	5.64945e+07	1.33095e+07	3.96955e+07	3.62225e+07	7.40334e+07	7.62637e+07	7.8049e+07	4.78526e+07	4.59179e+07	4.38804e+07	5.66704e+07	5.5406e+07	5.40978e+07
651	243.983	243.983	244.031	632.996	629.596	636.866	163	35	34	34	9	35	16	7.32352e+06	8.47509e+06	8.7857e+06	7.52094e+06	9.13391e+06	9.79651e+06	251134	7.06131e+06	6.56418e+06	7.62302e+06	8.71354e+06	9.25048e+06	1.52858e+06	7.80095e+06	8.58509e+06	1.81641e+06	8.4907e+06	8.92609e+06	9.18853e+06	9.63643e+06	9.82984e+06	8.81347e+06	9.32926e+06	9.73414e+06	1.96573e+06	9.11031e+06	9.16803e+06	9.23325e+06	1.01054e+07	1.0461e+07	3.24089e+06	9.45557e+06	9.68143e+06	3.97064e+06	9.7941e+06	9.9195e+06
652	244.263	244.251	244.268	173.777	170.275	179.264	100	21	21	22	3	17	16	542250	574054	586595	650519	611918	607471	551144	581638	654434	561444	528338	541092	9.70234e+06	8.01466e+06	9.05399e+06	3.98102e+06	3.48871e+06	3.59608e+06	5.4119e+06	5.30191e+06	5.39718e+06	2.11028e+06	2.14331e+06	2.13213e+06	2.53452e+06	4.81381e+06	4.60624e+06	498019	524229	514160	5.9609e+06	6.06033e+06	6.16866e+06	447988	528699	516668
653	244.139	244.108	244.191	97.8161	95.9662	105.754	67	17	7	14	9	4	16	4.65637e+06	4.37682e+06	3.96302e+06	5.57843e+06	5.22364e+06	5.17435e+06	3.62134e+06	5.18633e+06	4.30495e+06	3.37191e+06	3.68139e+06	3.44022e+06	6.99695e+06	5.46148e+06	5.02656e+06	6.31311e+06	4.14473e+06	4.08207e+06	4.83692e+06	4.73091e+06	7.41037e+06	4.4993e+06	4.09164e+06	4.04178e+06	3.53452e+06	4.7073e+06	4.49219e+06	4.21264e+06	3.92958e+06	3.90303e+06	5.8278e+06	4.98922e+06	4.3958e+06	4.85587e+06	4.90985e+06	4.61816e+06
654	244.188	244.182	244.211	67.9464	63.0089	70.5626	37	17	0	11	6	3	0	2.30974e+06	2.22524e+06	2.02062e+06	8.77816e+06	8.81549e+06	9.37812e+06	1.67182e+06	5.98795e+06	4.97449e+06	2.65931e+06	2.78374e+06	2.65267e+06	3.58148e+06	2.82078e+06	3.11443e+06	2.30756e+06	2.11764e+06	2.00336e+06	1.31187e+07	1.27158e+07	1.23317e+07	3.29026e+06	3.15472e+06	2.98976e+06	1.56366e+06	2.28124e+06	2.23459e+06	3.30158e+06	3.35132e+06	3.15163e+06	1.23329e+06	960686	1.04089e+06	7.14903e+06	6.97517e+06	7.15459e+06
655	244.85	244.849	244.85	276.305	240.988	279.998	131	30	23	31	9	27	11	389898	824090	729475	323523	764982	517506	509190	1.05346e+06	1.1795e+06	358894	748236	673550	233964	1.18593e+06	1.10647e+06	218899	1.07505e+06	1.13084e+06	686763	843986	673701	820350	959278	694808	758303	1.10375e+06	986147	682312	744774	603060	449282	1.26699e+06	1.07393e+06	425401	1.07593e+06	886159
656	244.982	244.954	245.009	411.171	407.538	416.077	169	36	36	36	9	36	16	4.19015e+07	4.66643e+07	4.19636e+07	4.08362e+07	4.6557e+07	5.12142e+07	1.10794e+07	2.47438e+07	2.06224e+07	3.55604e+07	3.88947e+07	3.97621e+07	2.03551e+07	2.31351e+07	2.61139e+07	2.40058e+07	3.0708e+07	3.06407e+07	2.49502e+07	2.36984e+07	2.62126e+07	3.02403e+07	3.08653e+07	3.02745e+07	1.38698e+07	2.33891e+07	2.39374e+07	2.78463e+07	2.86775e+07	3.00805e+07	2.17243e+07	2.29198e+07	2.33372e+07	2.38924e+07	2.64856e+07	2.59025e+07
657	245.08	245.078	245.081	527.193	526.645	527.612	167	36	36	34	9	36	16	2.15688e+07	2.15996e+07	2.17515e+07	2.13709e+07	2.24513e+07	2.39614e+07	1.40791e+07	1.82866e+07	1.59361e+07	2.10362e+07	2.07608e+07	2.16221e+07	2.99541e+07	1.81881e+07	1.92448e+07	3.22151e+07	2.11075e+07	2.10221e+07	2.17118e+07	2.12195e+07	2.22828e+07	2.04632e+07	1.98447e+07	2.03586e+07	1.05567e+07	1.90264e+07	1.91736e+07	2.14803e+07	2.23065e+07	2.28173e+07	1.96014e+07	1.97192e+07	2.01725e+07	2.04108e+07	2.09439e+07	2.10565e+07
658	245.078	245.077	245.081	207.304	206.815	207.662	164	33	36	34	9	36	16	2.67108e+07	2.60685e+07	2.51603e+07	5.06929e+06	5.36159e+06	5.57582e+06	5.34351e+06	1.26931e+07	1.06032e+07	1.6433e+07	1.61283e+07	1.62985e+07	1.36209e+07	1.16754e+07	1.25665e+07	1.25652e+07	1.22405e+07	1.19792e+07	1.48402e+07	1.41111e+07	1.37172e+07	1.58036e+06	1.55704e+06	1.53949e+06	4.05439e+06	7.90848e+06	7.91444e+06	1.42568e+07	1.4178e+07	1.43911e+07	8.84181e+06	8.85062e+06	8.78892e+06	8.26185e+06	7.88089e+06	7.88641e+06
659	245.09	245.003	245.117	369.721	366.023	379.688	84	28	8	27	9	11	1	5.52308e+06	5.62164e+06	5.63317e+06	5.11991e+06	5.09956e+06	5.28825e+06	4.43181e+06	5.24867e+06	5.01242e+06	5.29734e+06	5.54361e+06	5.53845e+06	5.36942e+06	5.15741e+06	5.56183e+06	5.63666e+06	5.1818e+06	5.37217e+06	4.55425e+06	4.44177e+06	4.24937e+06	4.10208e+06	3.82257e+06	4.28601e+06	3.39948e+06	4.41548e+06	8.85256e+06	3.23846e+06	3.33705e+06	3.11636e+06	4.23487e+06	4.27584e+06	4.23142e+06	3.43444e+06	4.18232e+06	4.31312e+06
660	245.161	245.08	245.179	309.948	299.933	331.782	169	34	36	34	9	36	16	2.64343e+07	2.46042e+07	2.52502e+07	2.32831e+07	2.80339e+07	2.18382e+07	1.31019e+06	9.12891e+06	6.27161e+06	1.52588e+07	1.71269e+07	1.60835e+07	1.03706e+07	8.84738e+06	1.07604e+07	1.11694e+07	1.17358e+07	1.18685e+07	1.19721e+07	1.25994e+07	1.30827e+07	1.23557e+07	1.2443e+07	1.22057e+07	1.71144e+06	8.47229e+06	7.58213e+06	1.19397e+07	1.29879e+07	1.5138e+07	9.49168e+06	9.5694e+06	1.00526e+07	1.0765e+07	1.02807e+07	1.13053e+07
661	245.226	245.129	245.227	68.8682	65.5306	72.4986	104	8	36	0	8	36	16	1.00989e+06	1.0413e+06	1.02012e+06	1.28347e+06	1.36958e+06	1.39582e+06	901064	1.14923e+06	972389	1.15869e+06	1.16292e+06	1.15738e+06	1.13641e+06	845986	907314	1.50556e+06	1.5353e+06	1.49066e+06	1.90049e+06	1.86344e+06	1.79026e+06	1.29186e+06	1.3295e+06	1.27704e+06	1.13983e+06	1.4895e+06	1.41127e+06	1.28409e+06	1.17969e+06	1.31156e+06	1.03483e+06	858208	937228	1.30466e+06	1.1595e+06	1.54741e+06
662	246.034	246.033	246.037	430.824	429.385	435.014	167	36	36	34	9	36	16	1.80936e+07	1.79964e+07	1.79113e+07	1.8258e+07	1.93469e+07	1.97857e+07	5.19288e+06	1.63142e+07	1.48685e+07	1.73378e+07	1.72803e+07	1.80515e+07	1.32224e+07	1.6135e+07	1.69995e+07	1.38737e+07	1.75654e+07	1.78292e+07	1.98058e+07	1.98937e+07	1.89457e+07	1.93485e+07	1.88912e+07	1.87527e+07	9.77608e+06	1.75323e+07	1.72818e+07	1.97075e+07	1.98313e+07	1.99242e+07	1.848e+07	1.86845e+07	1.84141e+07	1.86679e+07	1.89101e+07	1.86713e+07
663	246.165	246.118	246.171	320.596	317.43	339.417	148	26	30	32	9	35	16	3.33442e+07	3.02696e+07	2.94151e+07	3.17811e+07	3.50559e+07	3.79078e+07	1.13916e+07	2.11242e+07	1.26697e+07	2.96867e+07	3.00039e+07	3.01509e+07	2.27704e+07	1.72053e+07	2.16906e+07	3.11282e+07	3.20053e+07	3.13937e+07	3.25649e+07	2.70965e+07	2.59182e+07	2.76948e+07	2.56639e+07	2.41645e+07	1.30188e+07	2.31191e+07	1.97976e+07	3.2085e+07	3.06695e+07	3.225e+07	2.56571e+07	2.91934e+07	2.212e+07	3.12006e+07	3.28876e+07	2.9151e+07
664	246.106	246.071	246.122	365.753	344.584	369.97	141	28	30	32	0	35	16	2.68662e+07	4.26276e+07	5.53921e+07	2.61378e+07	3.89471e+07	4.39084e+07	5.26003e+06	1.61004e+07	2.01211e+07	2.33043e+07	3.68678e+07	4.51157e+07	1.92245e+07	1.26712e+07	2.38525e+07	1.35486e+07	1.29876e+07	3.57653e+07	1.29863e+07	4.30839e+07	4.89978e+07	1.14074e+07	3.44722e+07	4.10064e+07	7.01609e+06	1.05717e+07	2.87237e+07	1.30622e+07	4.03402e+07	4.86604e+07	8.79514e+06	1.22348e+07	3.59418e+07	1.01743e+07	1.48591e+07	3.99895e+07
665	247.004	247.004	247.004	632.675	630.409	636.866	167	36	36	34	9	36	16	2.40043e+07	2.27781e+07	2.20007e+07	2.45655e+07	2.46875e+07	2.5982e+07	9.73791e+06	1.80057e+07	1.54514e+07	2.42144e+07	2.37489e+07	2.40162e+07	1.79359e+07	2.02926e+07	2.18649e+07	1.88028e+07	2.25528e+07	2.21765e+07	2.76922e+07	2.62888e+07	2.67009e+07	2.58573e+07	2.52237e+07	2.45855e+07	1.78609e+07	2.35439e+07	2.29385e+07	2.86005e+07	2.89703e+07	2.92445e+07	2.96348e+07	2.5019e+07	2.47273e+07	3.03557e+07	2.70253e+07	2.66575e+07
666	247.093	247.092	247.094	218.617	217.876	219.098	167	36	36	34	9	36	16	7.8264e+06	7.66939e+06	7.42747e+06	8.07156e+06	8.27379e+06	8.72049e+06	2.98885e+06	6.54473e+06	5.52817e+06	7.97121e+06	7.86793e+06	7.82242e+06	7.42853e+06	6.49156e+06	6.97412e+06	7.92157e+06	7.70562e+06	7.64429e+06	5.17894e+06	5.19388e+06	4.82175e+06	5.05987e+06	5.35759e+06	5.15337e+06	2.77323e+06	5.1049e+06	4.84171e+06	5.93558e+06	5.85465e+06	6.06339e+06	5.06338e+06	5.16162e+06	4.66647e+06	5.68021e+06	5.36431e+06	5.4872e+06
667	246.933	246.926	247.113	418.447	410.892	419.734	66	15	19	12	3	13	4	1.50194e+07	1.89779e+06	1.85938e+06	1.31174e+07	1.79781e+06	1.77445e+06	2.98081e+06	2.58187e+06	2.45939e+06	1.29868e+07	2.09577e+06	2.27862e+06	49287.7	2.38046e+06	2.48596e+06	10551.3	2.19416e+06	2.32507e+06	2.17219e+06	2.48655e+06	2.22546e+06	2.21245e+06	2.52783e+06	2.18824e+06	318709	2.52249e+06	2.49512e+06	2.17229e+06	2.37721e+06	2.3501e+06	253358	3.01714e+06	2.42061e+06	353348	2.50488e+06	2.43631e+06
668	247.175	247.166	247.175	352.676	335.165	359.271	169	36	36	36	9	36	16	9.53391e+07	9.85032e+07	1.00392e+08	9.41357e+07	1.02636e+08	1.1303e+08	3.6315e+07	8.18901e+07	7.05702e+07	8.82856e+07	9.28975e+07	9.43286e+07	9.46701e+07	8.28897e+07	9.26868e+07	1.06165e+08	9.52582e+07	9.60536e+07	1.01479e+08	1.0415e+08	1.09688e+08	9.86014e+07	1.0176e+08	1.03696e+08	4.12449e+07	9.04184e+07	8.68787e+07	1.00995e+08	1.05374e+08	1.09278e+08	8.38084e+07	8.85134e+07	9.08678e+07	8.72624e+07	9.34814e+07	9.69665e+07
669	247.158	247.154	247.162	71.4679	65.6947	75.253	92	34	1	31	9	6	11	3.3006e+07	3.33371e+07	3.18489e+07	4.95852e+07	5.49701e+07	5.84027e+07	1.29879e+07	2.25882e+07	1.88751e+07	3.10443e+07	3.21851e+07	3.18743e+07	2.12776e+07	1.89188e+07	1.97388e+07	1.88871e+07	1.72798e+07	1.68221e+07	2.346e+07	2.30986e+07	2.27308e+07	1.82695e+07	1.78539e+07	1.78647e+07	1.35853e+07	2.05519e+07	1.99797e+07	3.07912e+07	3.06963e+07	3.06306e+07	1.84194e+07	1.77092e+07	1.75259e+07	3.88345e+07	3.89542e+07	3.86129e+07
670	247.176	247.176	247.177	395.079	393.752	396.465	165	34	36	34	9	36	16	2.73457e+07	2.66901e+07	2.7351e+07	2.69832e+07	2.88826e+07	2.96457e+07	6.80442e+06	2.3907e+07	2.16e+07	2.48499e+07	2.49656e+07	2.59507e+07	2.06019e+07	2.27853e+07	2.63618e+07	2.39764e+07	2.71628e+07	2.79934e+07	2.95678e+07	2.97206e+07	2.97859e+07	2.74984e+07	2.77339e+07	2.8177e+07	1.0838e+07	2.55156e+07	2.51753e+07	2.91892e+07	2.97703e+07	3.0458e+07	2.89088e+07	2.7865e+07	2.87959e+07	3.02156e+07	2.89324e+07	2.87167e+07
671	248.005	248.005	248.006	632.827	630.409	636.866	167	36	36	34	9	36	16	2.79471e+06	2.58316e+06	2.57754e+06	2.80455e+06	2.79228e+06	3.01647e+06	819285	1.97321e+06	1.69858e+06	2.78039e+06	2.60803e+06	2.80195e+06	1.94673e+06	2.35496e+06	2.5262e+06	2.14648e+06	2.6398e+06	2.54563e+06	3.28484e+06	3.09671e+06	3.07096e+06	2.98577e+06	2.99563e+06	2.8698e+06	2.06088e+06	2.63971e+06	2.77139e+06	3.37504e+06	3.42011e+06	3.56065e+06	3.46957e+06	2.92535e+06	2.84598e+06	3.6408e+06	3.11196e+06	3.12327e+06
672	248.021	248.019	248.057	500.51	495.242	504.331	162	34	36	34	8	35	15	996030	981062	1.2152e+06	1.01054e+06	1.30416e+06	1.52825e+06	156411	761969	571933	951659	910752	1.3078e+06	781999	688286	797907	879448	973709	921708	940947	1.20609e+06	1.2239e+06	894467	1.15708e+06	1.06774e+06	281924	755607	798289	1.32067e+06	1.39723e+06	1.38703e+06	860716	790287	807693	892207	932320	945682
673	248.07	248.064	248.083	441.126	439.543	443.188	150	33	22	34	9	36	16	3.55112e+06	2.94933e+06	3.18915e+06	3.1204e+06	2.78999e+06	2.82849e+06	4.6234e+06	8.99195e+06	8.16285e+06	5.97591e+06	5.41057e+06	5.1466e+06	1.45924e+07	9.43358e+06	9.57789e+06	1.44298e+07	9.77167e+06	9.83304e+06	1.03589e+06	1.27983e+06	1.77489e+06	1.28133e+06	1.24415e+06	1.84462e+06	5.26452e+06	7.00258e+06	7.38716e+06	2.49887e+06	2.63527e+06	2.97929e+06	5.45001e+06	4.38061e+06	4.95463e+06	9.50745e+06	8.06793e+06	8.42471e+06
674	248.178	248.17	248.179	352.989	349.276	359.728	167	36	36	34	9	36	16	8.87081e+06	9.97481e+06	9.68461e+06	9.06612e+06	9.95923e+06	1.11808e+07	4.46443e+06	7.99243e+06	7.98672e+06	8.67942e+06	9.29126e+06	9.02545e+06	9.50034e+06	8.63407e+06	9.14915e+06	1.09921e+07	9.25323e+06	9.5517e+06	9.82527e+06	1.03529e+07	1.08336e+07	9.65507e+06	1.02069e+07	1.04837e+07	4.56866e+06	9.33139e+06	8.5442e+06	9.84119e+06	1.06334e+07	1.1127e+07	7.80749e+06	8.74657e+06	8.81043e+06	8.67953e+06	9.05291e+06	9.76459e+06
675	248.179	248.176	248.188	395.23	393.925	397.007	164	34	36	34	9	36	15	2.9126e+06	2.72659e+06	2.74646e+06	2.86714e+06	2.97421e+06	2.99993e+06	755694	2.34291e+06	2.20537e+06	2.58554e+06	2.53388e+06	2.76559e+06	2.12417e+06	2.2627e+06	2.61049e+06	2.37226e+06	2.72356e+06	2.96106e+06	3.10704e+06	3.04134e+06	3.00591e+06	2.82942e+06	2.83117e+06	2.87456e+06	1.10971e+06	2.63885e+06	2.62721e+06	2.97465e+06	3.10673e+06	3.06826e+06	3.03428e+06	2.89672e+06	2.89681e+06	3.01225e+06	3.09727e+06	2.89004e+06
676	248.123	248.09	248.21	190.245	178.417	198.02	94	20	28	9	0	25	12	4.21016e+06	3.97161e+06	3.71991e+06	4.23548e+06	3.79406e+06	3.75253e+06	4.0321e+06	1.88954e+06	3.40763e+06	5.10797e+06	4.09049e+06	4.63787e+06	3.70925e+06	3.52102e+06	3.23735e+06	4.03591e+06	3.68951e+06	3.5611e+06	1.87217e+06	1.79991e+06	3.2336e+06	1.74978e+06	1.62302e+06	3.45847e+06	3.65485e+06	3.31366e+06	3.04537e+06	4.26781e+06	3.99083e+06	3.62602e+06	3.87117e+06	3.18604e+06	2.81525e+06	5.21002e+06	4.8335e+06	4.59202e+06
677	248.145	248.135	248.163	70.2571	66.795	74.1483	51	22	0	20	6	3	0	4.85613e+06	4.69186e+06	4.44318e+06	6.80336e+06	7.47456e+06	7.72601e+06	2.45716e+06	3.6426e+06	2.29208e+06	4.81577e+06	4.62291e+06	4.61165e+06	2.42432e+06	2.29547e+06	2.29407e+06	2.88867e+06	2.654e+06	2.4831e+06	3.51502e+06	3.24927e+06	3.18099e+06	2.69245e+06	2.62679e+06	2.43332e+06	2.62284e+06	2.39026e+06	2.23378e+06	4.67757e+06	4.55259e+06	4.30046e+06	2.41459e+06	2.30482e+06	2.21518e+06	5.49559e+06	5.38501e+06	5.3065e+06
678	249.001	249	249.001	633.012	631.382	637.468	115	25	19	25	9	24	13	3.19176e+06	3.05064e+06	2.87849e+06	3.26977e+06	3.29388e+06	3.32789e+06	1.46236e+06	2.26828e+06	1.92669e+06	3.29654e+06	3.12322e+06	3.13497e+06	2.44176e+06	2.56937e+06	2.77676e+06	2.51431e+06	2.95546e+06	2.97236e+06	3.8124e+06	3.53591e+06	3.55259e+06	3.41789e+06	3.39669e+06	3.30246e+06	2.39706e+06	3.06359e+06	3.05958e+06	3.91843e+06	3.87429e+06	3.94282e+06	4.05359e+06	3.34583e+06	3.35976e+06	4.08068e+06	3.57269e+06	3.48186e+06
679	249.064	249.03	249.074	343.925	343.06	371.343	212	36	36	34	9	36	16	9.10858e+06	9.47229e+06	8.78564e+06	7.44364e+06	8.29831e+06	9.75279e+06	1.25849e+06	6.96008e+06	4.90464e+06	6.85629e+06	7.53733e+06	7.71062e+06	6.08239e+06	6.86866e+06	8.03231e+06	9.38211e+06	8.41016e+06	8.40748e+06	1.28689e+07	1.256e+07	1.20919e+07	8.63047e+06	8.21744e+06	7.69452e+06	3.1272e+06	7.54716e+06	5.18996e+06	1.09837e+07	1.12692e+07	1.13026e+07	1.06664e+07	9.92238e+06	1.03288e+07	1.06776e+07	1.00194e+07	1.11731e+07
680	249.134	249.133	249.135	127.086	125.083	129.166	89	13	30	13	2	22	9	1.27673e+07	1.52338e+07	1.69369e+07	1.4921e+07	1.9763e+07	2.44453e+07	5.05936e+06	1.37891e+07	1.37685e+07	1.02035e+07	1.18702e+07	1.44436e+07	1.00883e+07	1.18884e+07	1.52093e+07	1.519e+07	1.86667e+07	2.24297e+07	2.58858e+07	2.79322e+07	3.03408e+07	2.07953e+07	2.32186e+07	2.54128e+07	8.00303e+06	1.69643e+07	2.01764e+07	2.25202e+07	2.7192e+07	3.14182e+07	1.91942e+07	2.07847e+07	2.28407e+07	1.74919e+07	2.00284e+07	2.19791e+07
681	249.117	249.017	249.135	267.696	265.852	274.988	94	29	28	14	0	13	10	3.42299e+06	3.93264e+06	4.45535e+06	3.67856e+06	5.3094e+06	6.61679e+06	1.59404e+06	4.00025e+06	4.15597e+06	2.93808e+06	3.72641e+06	4.38882e+06	2.89823e+06	3.68833e+06	4.8989e+06	1.66238e+06	4.77844e+06	5.62248e+06	5.27962e+06	6.37323e+06	7.06634e+06	5.02861e+06	5.81876e+06	6.62876e+06	2.70599e+06	5.45193e+06	6.10009e+06	5.41835e+06	6.31507e+06	7.36806e+06	5.28674e+06	5.98185e+06	6.57568e+06	5.57502e+06	6.38992e+06	7.17923e+06
682	249.134	249.134	249.135	99.9347	97.2446	101.032	84	23	9	21	7	15	9	1.26081e+07	1.50976e+07	1.64743e+07	1.4791e+07	1.97845e+07	2.3727e+07	3.14991e+06	1.35725e+07	1.37303e+07	1.00281e+07	1.19028e+07	1.46392e+07	7.01345e+06	1.16936e+07	1.5021e+07	1.09833e+07	1.81666e+07	2.20057e+07	2.54871e+07	2.73647e+07	2.96364e+07	2.04913e+07	2.26856e+07	2.47083e+07	5.15156e+06	1.68016e+07	1.97541e+07	2.20591e+07	2.67782e+07	3.07376e+07	1.90106e+07	2.07405e+07	2.23417e+07	1.72701e+07	1.96227e+07	2.13781e+07
683	249.156	249.154	249.177	420.534	419.173	421.356	150	34	34	32	0	34	16	1.60621e+06	1.30342e+06	1.17806e+06	1.44359e+06	1.19853e+06	1.11503e+06	324470	886044	702464	1.16381e+06	1.11052e+06	990164	934054	913671	889820	984099	961896	833524	782027	666046	543943	919330	691272	604382	430485	642129	519645	849331	710036	576648	881981	652410	459238	912380	704377	565846
684	249.173	249.168	249.196	69.6539	66.2409	72.9638	126	35	20	30	9	16	16	5.23937e+06	5.21721e+06	5.05668e+06	6.76092e+06	7.56237e+06	8.33683e+06	1.25581e+06	3.24365e+06	2.47637e+06	5.19498e+06	5.50434e+06	5.35728e+06	1.97084e+06	2.19073e+06	1.60232e+06	3.13504e+06	3.09581e+06	3.22268e+06	3.49249e+06	3.53095e+06	3.6981e+06	2.41488e+06	2.41825e+06	2.43548e+06	1.92628e+06	3.91797e+06	3.77456e+06	4.57167e+06	4.55385e+06	4.79798e+06	1.99264e+06	2.04862e+06	1.96624e+06	4.77263e+06	4.90178e+06	5.05548e+06
685	250.08	250.075	250.08	335.717	333.834	341.834	156	32	35	31	9	34	15	1.20326e+07	1.26168e+07	1.32543e+07	1.29423e+07	1.20385e+07	1.25899e+07	1.05449e+06	1.40806e+07	1.36906e+07	1.15164e+07	1.09309e+07	1.27231e+07	1.36487e+06	1.40129e+07	1.42272e+07	1.51227e+06	1.2836e+07	1.32893e+07	1.56135e+07	1.69121e+07	1.72849e+07	1.47464e+07	1.51189e+07	1.60965e+07	1.32305e+07	1.29095e+07	1.46174e+07	1.42287e+07	1.57665e+07	1.54194e+07	1.51474e+07	1.48199e+07	1.63488e+07	1.54144e+07	1.44317e+07	1.65833e+07
686	250.079	250.014	250.08	372.824	368.679	375.349	155	34	32	33	9	34	13	8.53247e+06	8.67883e+06	1.16833e+07	9.04543e+06	7.59096e+06	2.92539e+06	2.72184e+06	1.18507e+07	1.62455e+07	1.02912e+07	1.05043e+07	1.08828e+07	1.36977e+06	1.12556e+07	1.26043e+07	1.26266e+06	2.51296e+06	8.94111e+06	8.58093e+06	9.58428e+06	9.32864e+06	8.73614e+06	9.83445e+06	1.03683e+07	1.83271e+07	1.03423e+07	1.2145e+07	1.91955e+06	3.22617e+06	3.27999e+06	8.8488e+06	9.84371e+06	1.10359e+07	1.40008e+06	7.8255e+06	1.00042e+07
687	250.08	250.08	250.084	433.873	430.829	457.545	107	29	19	26	9	18	6	3.62167e+07	3.78533e+07	3.84973e+07	3.78734e+07	3.86091e+07	3.96869e+07	1.89962e+06	3.42255e+07	3.38624e+07	3.7092e+07	3.79525e+07	3.90579e+07	3.54784e+06	3.39733e+07	3.61911e+07	3.46407e+06	3.74058e+07	3.90023e+07	3.65105e+07	3.69668e+07	3.79806e+07	3.5002e+07	3.58043e+07	3.69399e+07	2.46125e+07	3.48017e+07	3.56661e+07	3.75134e+07	3.97679e+07	3.7615e+07	3.68345e+07	3.51336e+07	3.6644e+07	3.61721e+07	3.64867e+07	3.65711e+07
688	250.08	250.045	250.092	122.794	112.35	143.536	62	27	11	7	9	6	2	7.86523e+06	7.15551e+06	7.56026e+06	7.09236e+06	6.8474e+06	7.01288e+06	4.58716e+06	1.07998e+07	1.00567e+07	6.82739e+06	6.4724e+06	635474	9.9731e+06	9.3087e+06	9.48205e+06	1.12356e+07	1.03265e+07	1.01899e+07	9.73116e+06	9.77754e+06	9.0801e+06	7.99978e+06	8.10447e+06	7.91951e+06	6.92002e+06	8.55528e+06	8.47363e+06	1.00788e+07	9.65362e+06	1.00139e+07	1.14092e+07	1.09521e+07	1.08249e+07	1.10208e+07	9.8322e+06	9.79506e+06
689	250.177	250.168	250.179	72.3949	70.4233	74.131	77	36	0	32	9	0	0	2.96657e+06	3.00376e+06	2.93423e+06	8.62019e+06	9.05043e+06	9.07432e+06	669026	1.75102e+06	1.47044e+06	5.22702e+06	5.41547e+06	5.32709e+06	1.42091e+06	1.90944e+06	2.20498e+06	534496	735146	791121	6.1347e+06	6.21143e+06	6.21045e+06	1.45768e+06	1.39194e+06	1.3883e+06	929592	1.48494e+06	1.49994e+06	902089	903587	938149	1.67332e+06	1.7571e+06	1.68467e+06	1.89819e+06	1.90359e+06	1.9517e+06
690	250.96	250.955	250.96	75.8991	74.53	76.4331	13	0	0	0	0	0	13	5.31213e+06	5.13637e+06	5.36789e+06	6.90471e+06	7.09648e+06	7.72992e+06	3.30358e+06	4.55981e+06	4.37224e+06	7.77824e+06	7.82766e+06	7.95607e+06	4.49119e+06	3.55452e+06	3.84211e+06	6.16146e+06	5.44767e+06	5.52105e+06	1.22974e+06	1.35452e+06	1.33148e+06	3.17009e+06	3.153e+06	3.16766e+06	1.79633e+06	2.16285e+06	2.28275e+06	3.27551e+06	3.55711e+06	3.51981e+06	1.12036e+06	1.07814e+06	1.18387e+06	2.85473e+06	2.67662e+06	2.96402e+06
691	251.087	251.077	251.105	154.761	152.733	155.337	167	36	36	34	9	36	16	2.14464e+07	2.02488e+07	1.96229e+07	2.06118e+07	2.1218e+07	2.27457e+07	7.25017e+06	1.77548e+07	1.47472e+07	2.05486e+07	2.01528e+07	2.05114e+07	2.00816e+07	1.67969e+07	1.83983e+07	2.23834e+07	2.08135e+07	2.04566e+07	2.60588e+07	2.44762e+07	2.42722e+07	2.2943e+07	2.22518e+07	2.14224e+07	1.25786e+07	2.17748e+07	2.21459e+07	2.73552e+07	2.74227e+07	2.80653e+07	2.44165e+07	2.35502e+07	2.35806e+07	2.65099e+07	2.55e+07	2.49504e+07
692	251.037	251.032	251.058	374.025	370.906	375.643	127	32	33	20	9	18	15	2.92875e+06	2.61014e+06	2.76235e+06	2.6001e+06	2.65613e+06	2.80337e+06	149943	950039	642895	2.26496e+06	2.10052e+06	2.16581e+06	2.93255e+06	866163	2.15476e+06	3.68509e+06	2.0379e+06	2.24709e+06	2.57099e+06	2.30519e+06	2.25217e+06	2.37049e+06	1.03099e+06	1.89769e+06	194046	2.57798e+06	745839	2.20649e+06	2.06142e+06	2.05896e+06	2.85866e+06	2.8002e+06	2.59253e+06	2.40204e+06	2.15634e+06	2.3009e+06
693	251.112	251.107	251.138	276.243	274.868	279.74	92	17	25	18	0	30	2	1.32826e+06	1.21304e+06	1.25079e+06	1.43707e+06	1.51372e+06	1.63544e+06	949839	2.34816e+06	1.71424e+06	1.33519e+06	1.33459e+06	1.40823e+06	1.57571e+06	1.66219e+06	2.11333e+06	2.16977e+06	3.23219e+06	3.24123e+06	1.96727e+06	1.74327e+06	1.65813e+06	1.57178e+06	1.37097e+06	1.37761e+06	963892	1.92559e+06	1.82683e+06	2.27146e+06	2.14133e+06	2.21649e+06	1.78355e+06	1.79701e+06	1.6921e+06	2.37666e+06	2.40539e+06	2.26643e+06
694	251.031	251.022	251.116	419.304	409.114	420.034	54	8	9	13	0	11	13	822755	799648	818932	860550	817050	712536	328304	392469	331536	631952	810541	702950	561483	424283	370515	520475	495337	482695	314993	324192	311262	516207	529921	461289	244361	351210	316586	453151	336280	387653	337834	285913	287232	348670	374734	352464
695	251.153	251.078	251.186	76.1078	73.8457	88.4107	154	36	36	34	9	36	3	1.00371e+07	9.92785e+06	9.61695e+06	1.41734e+07	1.4915e+07	1.61006e+07	4.84037e+06	1.24935e+07	1.10502e+07	1.00316e+07	1.00459e+07	1.04237e+07	1.11723e+07	1.08393e+07	1.19769e+07	2.79914e+07	2.7683e+07	2.83845e+07	3.05964e+07	3.09155e+07	3.03009e+07	2.2929e+07	2.29915e+07	2.30112e+07	1.99753e+07	3.48006e+07	3.47121e+07	1.40503e+07	1.47749e+07	1.50903e+07	2.59585e+07	2.57012e+07	2.54759e+07	1.7325e+07	1.65982e+07	1.66427e+07
696	252.144	252.02	252.144	446.051	427.105	448.119	46	7	9	7	8	11	4	5.79099e+06	6.477e+06	7.51097e+06	6.1572e+06	7.14238e+06	8.32552e+06	7.37674e+06	6.33707e+06	6.37319e+06	5.37014e+06	6.24603e+06	6.96488e+06	1.80223e+07	6.2053e+06	6.99128e+06	1.7275e+07	6.43089e+06	7.18646e+06	6.84295e+06	7.37863e+06	9.0115e+06	6.36701e+06	7.34692e+06	8.87666e+06	3.55989e+06	6.64468e+06	7.79646e+06	6.58554e+06	7.28356e+06	8.40271e+06	6.19475e+06	7.04925e+06	8.44012e+06	6.37239e+06	7.20437e+06	8.3742e+06
697	252.188	252.148	252.197	76.4157	75.1587	79.6543	74	34	1	28	7	4	0	1.08128e+06	1.1055e+06	992609	1.46234e+06	1.65726e+06	1.72736e+06	352164	1.03318e+06	1.0243e+06	1.19852e+06	1.19403e+06	1.22037e+06	596548	638153	744637	4.10573e+06	3.03044e+06	3.00377e+06	2.77539e+06	2.65533e+06	2.62349e+06	1.75838e+06	1.69285e+06	1.74636e+06	1.84205e+06	3.08723e+06	3.06445e+06	1.14959e+06	1.08438e+06	1.05171e+06	1.28452e+06	1.26897e+06	1.2844e+06	972448	967014	927251
698	252.999	252.977	253.018	499.873	495.319	501.882	164	34	36	34	9	35	16	1.68061e+06	1.34939e+06	1.52457e+06	1.6321e+06	1.72299e+06	1.7536e+06	588207	1.37883e+06	1.21453e+06	1.56968e+06	1.58205e+06	1.6182e+06	1.44041e+06	1.36444e+06	1.40043e+06	1.52437e+06	1.62111e+06	1.67845e+06	1.59667e+06	1.65135e+06	1.56844e+06	1.56705e+06	1.57238e+06	1.42049e+06	784440	1.47641e+06	1.42655e+06	1.72732e+06	1.7653e+06	1.69151e+06	1.56119e+06	1.29431e+06	1.47907e+06	1.5762e+06	1.56392e+06	1.61533e+06
699	253.069	253.036	253.126	352.832	325.333	372.269	168	35	36	34	2	36	16	6.16457e+06	5.25507e+06	5.01139e+06	1.0941e+07	1.11724e+07	1.14055e+07	1.54144e+06	6.40468e+06	4.7121e+06	7.79095e+06	7.52165e+06	7.29914e+06	5.92876e+06	6.81e+06	7.79431e+06	8.94026e+06	8.81869e+06	8.61865e+06	4.60721e+06	4.21019e+06	4.26545e+06	8.66759e+06	8.09748e+06	7.84732e+06	2.57187e+06	6.21199e+06	4.53323e+06	8.74323e+06	8.93907e+06	8.35251e+06	5.15571e+06	4.95963e+06	4.50747e+06	9.79485e+06	8.47906e+06	8.20854e+06
700	253.17	253.144	253.242	78.6272	70.0588	94.0044	72	23	7	22	4	15	1	766435	806278	770943	934680	977849	1.09667e+06	629173	740174	757609	1.12347e+06	1.17278e+06	1.13913e+06	1.08967e+06	964498	975518	3.6651e+06	3.52921e+06	3.64899e+06	4.96794e+06	4.59334e+06	4.61957e+06	3.61869e+06	1.5591e+06	3.51833e+06	1.21993e+06	3.51564e+06	3.06368e+06	4.12483e+06	890450	4.10192e+06	3.25448e+06	3.03089e+06	2.92094e+06	615769	545547	628686
701	254.148	254.062	254.15	354.393	352.937	378.333	158	35	36	34	1	36	16	2.66493e+08	2.68297e+08	2.14748e+08	2.61591e+08	2.794e+08	2.28851e+08	5.71146e+06	9.54493e+07	1.22801e+07	2.50781e+08	3.05343e+08	3.23155e+08	1.46496e+08	3.76376e+07	7.86706e+07	2.55043e+08	2.80097e+08	2.54052e+08	8.34195e+07	8.02283e+07	7.33427e+07	1.07384e+08	8.00566e+07	5.37607e+07	991375	4.77406e+07	2.61823e+07	1.81719e+08	2.26891e+08	2.45589e+08	6.87263e+07	5.31637e+07	4.36717e+07	2.20865e+08	2.40278e+08	2.06569e+08
702	254.175	254.16	254.203	76.7423	68.1609	80.1977	78	34	1	31	8	4	0	879255	894485	789466	1.93451e+06	1.79072e+06	1.95564e+06	427997	911331	761582	1.08623e+06	1.16987e+06	1.15043e+06	854858	873263	942066	3.92565e+06	3.68345e+06	3.40619e+06	4.26983e+06	3.94197e+06	3.89008e+06	2.45822e+06	2.37799e+06	2.32646e+06	2.00379e+06	3.57114e+06	3.47019e+06	760626	778498	766262	1.30707e+06	1.14401e+06	1.27411e+06	770130	725478	779324
703	254.824	254.823	254.824	189.014	187.173	195.179	57	23	0	25	9	0	0	393840	422717	369049	366858	421810	387704	292872	466395	473456	388684	410355	444672	175163	485165	523846	146253	409115	465910	356556	434233	408150	389385	438095	441518	409618	471482	511845	363857	428548	445401	402832	386589	464607	393458	395162	364454
704	254.982	254.982	254.983	406.691	406.514	416.076	169	36	36	36	9	36	16	1.02708e+09	9.98498e+08	9.83972e+08	1.02449e+09	1.04175e+09	1.03972e+09	6.83638e+08	9.75523e+08	9.01444e+08	1.016e+09	1.01501e+09	1.00768e+09	1.09482e+09	9.5495e+08	9.81634e+08	1.13927e+09	1.02192e+09	1.01654e+09	1.03588e+09	1.0308e+09	1.02787e+09	1.00794e+09	9.94608e+08	9.98963e+08	7.4367e+08	9.84284e+08	9.80103e+08	1.05538e+09	1.04437e+09	1.04974e+09	1.02953e+09	1.01222e+09	1.01191e+09	1.05991e+09	1.03114e+09	1.03041e+09
705	255.152	255.07	255.153	354.588	352.937	379.163	156	35	36	34	0	36	15	3.32218e+07	3.34179e+07	2.67768e+07	3.16498e+07	3.5134e+07	2.85871e+07	943406	1.20614e+07	603127	3.09398e+07	3.7676e+07	3.96668e+07	1.73661e+07	5.50845e+06	1.09701e+07	3.14995e+07	3.43621e+07	3.15681e+07	1.28793e+07	1.38332e+07	1.41751e+07	1.62663e+07	1.46233e+07	1.1513e+07	263943	8.81069e+06	2.7233e+06	2.18638e+07	2.81759e+07	3.18891e+07	1.00406e+07	9.34909e+06	8.7761e+06	2.73556e+07	3.08267e+07	2.70939e+07
706	255.169	255.162	255.172	69.9589	69.0955	71.4331	9	1	0	0	8	0	0	760158	798657	782883	639098	801403	848318	457406	694961	582606	883726	913391	890411	317320	313202	308371	746369	612700	634100	585594	661471	534881	520771	499591	542859	457329	640305	646491	977626	866149	1.00638e+06	335888	317226	407160	686504	661113	656521
707	255.986	255.985	255.987	406.674	406.438	416.077	169	36	36	36	9	36	16	5.48155e+07	5.31689e+07	5.34604e+07	5.42445e+07	5.54146e+07	5.63072e+07	3.62287e+07	5.11708e+07	4.72744e+07	5.40895e+07	5.33328e+07	5.39216e+07	5.87467e+07	4.98275e+07	5.10188e+07	6.13169e+07	5.51247e+07	5.36597e+07	5.58942e+07	5.51595e+07	5.42206e+07	5.35734e+07	5.33718e+07	5.3698e+07	3.92692e+07	5.33736e+07	5.32691e+07	5.41684e+07	5.70028e+07	5.68925e+07	5.47257e+07	5.3556e+07	5.39968e+07	5.58672e+07	5.4588e+07	5.46599e+07
708	256.152	256.145	256.162	355.078	353.352	356.117	50	17	1	23	0	1	8	2.32883e+06	2.40224e+06	1.98616e+06	1.79695e+06	2.10048e+06	1.88869e+06	166422	1.12802e+06	610062	2.30309e+06	2.60527e+06	2.72858e+06	1.01536e+06	555498	824004	1.9367e+06	2.63864e+06	2.3419e+06	852065	961502	857262	1.05094e+06	853239	846642	1.19462e+06	538713	595710	1.45015e+06	2.30858e+06	2.26182e+06	847506	579332	699475	2.14303e+06	2.25657e+06	1.91879e+06
709	256.175	256.152	256.29	101.024	72.1237	106.933	163	30	36	34	9	36	16	826476	1.09581e+06	951177	2.32488e+07	2.47958e+07	2.84814e+07	2.72935e+06	2.67061e+06	1.07563e+06	1.2252e+06	8.09864e+06	8.62196e+06	1.13635e+07	9.5002e+06	1.03977e+07	1.71702e+07	1.58504e+07	1.56948e+07	3.2364e+07	3.11172e+07	3.15231e+07	8.99012e+06	8.50265e+06	8.85901e+06	5.46596e+06	9.91633e+06	8.47251e+06	2.43173e+06	1.18527e+06	2.35775e+06	1.05974e+07	1.04097e+07	1.07581e+07	952269	2.61004e+06	2.50199e+06
710	256.297	256.164	256.302	149.392	146.123	177.588	60	21	3	20	6	7	3	489188	528382	537429	1.33881e+06	1.52469e+06	1.61977e+06	536458	846897	759837	2.50548e+06	2.39701e+06	2.42443e+06	666239	599191	660070	1.04642e+06	919688	1.03941e+06	628770	696121	617997	602117	642934	654324	811638	1.11458e+06	1.11408e+06	492726	583333	610323	502895	520167	557575	526583	562681	624586
711	256.171	256.153	256.19	207.309	205.674	211.143	47	15	1	17	5	9	0	2.03782e+06	2.18886e+06	2.08329e+06	2.45945e+06	2.40616e+06	2.27573e+06	1.75653e+06	2.7304e+06	2.56594e+06	2.34266e+06	2.23976e+06	2.28773e+06	3.01588e+06	2.31025e+06	3.57249e+06	3.82407e+06	4.24729e+06	4.372e+06	2.79522e+06	2.7657e+06	2.73178e+06	4.27877e+06	4.09395e+06	4.08674e+06	2.40659e+06	5.29289e+06	5.35471e+06	2.30445e+06	3.27275e+06	2.35846e+06	2.67473e+06	3.65015e+06	3.55231e+06	2.61096e+06	2.65227e+06	2.48318e+06
712	256.984	256.982	256.989	384.499	382.685	407.457	163	32	36	34	9	36	16	2.55392e+07	2.27831e+07	2.12888e+07	2.54418e+07	2.59728e+07	1.98848e+07	7.67681e+06	1.88075e+07	1.36808e+07	2.32189e+07	2.36268e+07	2.31964e+07	2.03615e+07	1.67032e+07	1.952e+07	2.68962e+07	2.28878e+07	2.22757e+07	2.66048e+07	2.38657e+07	2.30504e+07	2.26667e+07	2.19637e+07	1.96956e+07	8.20932e+06	1.09689e+07	1.81676e+07	1.96013e+07	2.68213e+07	2.77886e+07	2.16433e+07	2.13173e+07	1.95826e+07	2.62298e+07	2.4571e+07	2.31924e+07
713	256.964	256.964	256.964	655.514	652.419	670.63	42	3	7	20	0	11	1	8.13443e+06	7.9107e+06	7.5147e+06	8.02873e+06	8.22425e+06	8.28405e+06	1.23314e+07	6.50173e+06	6.09949e+06	8.20497e+06	8.48679e+06	8.15365e+06	1.46824e+07	7.63394e+06	7.72574e+06	1.35944e+07	7.70295e+06	7.36636e+06	9.23415e+06	9.04068e+06	8.79732e+06	8.76271e+06	8.8688e+06	8.5001e+06	7.27124e+06	8.61106e+06	8.43597e+06	9.26166e+06	9.85164e+06	9.32119e+06	8.67553e+06	8.91355e+06	8.85875e+06	9.82252e+06	9.24621e+06	9.32844e+06
714	257.144	257.118	257.147	354.461	321.523	361.057	178	36	36	34	9	36	16	1.14586e+08	1.19305e+08	1.21366e+08	1.00744e+08	8.34682e+07	1.18564e+08	1.53027e+07	8.36459e+07	6.2293e+07	9.01066e+07	1.07432e+08	1.04314e+08	5.17902e+07	7.51067e+07	8.16112e+07	7.36077e+07	8.78189e+07	1.08429e+08	1.0931e+08	9.83993e+07	9.51991e+07	8.76919e+07	8.81447e+07	1.05443e+08	2.28471e+07	6.72786e+07	7.65086e+07	9.33133e+07	8.03716e+07	7.79532e+07	3.83149e+07	4.09221e+07	4.26951e+07	5.47509e+07	3.81122e+07	4.60962e+07
715	257.114	257.112	257.115	208.671	208.082	209.416	146	31	25	34	9	31	16	6.68831e+06	6.98913e+06	6.56282e+06	6.32448e+06	6.85306e+06	7.27037e+06	1.926e+06	4.93136e+06	4.10105e+06	6.44371e+06	6.38345e+06	6.86858e+06	4.92842e+06	4.80644e+06	5.29962e+06	5.49046e+06	5.66851e+06	5.81715e+06	6.90691e+06	6.61241e+06	6.63766e+06	6.43818e+06	6.17758e+06	6.05672e+06	2.57479e+06	5.76732e+06	5.54031e+06	7.66878e+06	7.774e+06	7.7732e+06	6.36934e+06	6.27214e+06	6.19467e+06	6.84854e+06	6.61571e+06	6.61049e+06
716	257.197	257.195	257.197	495.346	490.563	496.909	159	34	35	33	9	33	15	1.31617e+07	1.21115e+07	1.16408e+07	1.31612e+07	1.22837e+07	1.13239e+07	265407	1.30757e+07	1.28652e+07	1.3283e+07	1.18763e+07	1.14575e+07	214739	1.29929e+07	1.22608e+07	267161	1.28545e+07	1.23404e+07	1.32695e+07	1.20722e+07	1.15653e+07	1.35585e+07	1.27921e+07	1.18473e+07	1.5223e+07	1.31549e+07	1.20928e+07	1.29932e+07	1.19158e+07	1.13565e+07	1.38594e+07	1.24336e+07	1.15649e+07	1.3001e+07	1.21666e+07	1.12656e+07
717	257.145	257.127	257.229	94.9362	71.9303	102.281	150	30	36	23	9	36	16	4.62572e+06	4.53929e+06	4.20311e+06	2.11141e+06	2.19119e+06	2.63251e+06	1.76377e+07	2.43583e+07	2.46474e+07	4.44558e+06	4.59173e+06	4.30223e+06	3.66653e+07	2.58397e+07	2.71301e+07	3.12816e+07	2.27948e+07	2.35968e+07	1.22889e+07	1.24967e+07	1.25917e+07	1.31824e+07	1.2882e+07	1.29139e+07	2.26814e+07	2.68601e+07	2.57046e+07	9.10905e+06	9.26646e+06	9.16933e+06	2.57926e+07	2.57814e+07	2.49878e+07	2.8774e+07	2.87539e+07	2.77588e+07
718	257.998	257.993	258.02	385.043	381.891	385.993	167	36	36	34	9	36	16	5.75989e+07	6.12366e+07	6.15797e+07	5.92693e+07	6.80239e+07	6.96117e+07	4.76779e+06	5.13604e+07	3.58888e+07	5.455e+07	6.07937e+07	6.19979e+07	5.47106e+07	5.15837e+07	5.78513e+07	6.26702e+07	6.42304e+07	6.26756e+07	6.05174e+07	6.09577e+07	5.85282e+07	5.73983e+07	5.64244e+07	5.3491e+07	1.41211e+07	5.3052e+07	4.78052e+07	5.6757e+07	6.0042e+07	6.03632e+07	5.27292e+07	5.74927e+07	5.60048e+07	5.61368e+07	6.2196e+07	6.37573e+07
719	257.933	257.932	257.933	504.12	500.004	506.687	73	19	12	16	8	16	2	5.35182e+06	4.75067e+06	4.45846e+06	5.30826e+06	4.72644e+06	4.48622e+06	4.19008e+06	4.81725e+06	4.3525e+06	5.17002e+06	4.63335e+06	4.36813e+06	4.76251e+06	4.80469e+06	4.46644e+06	4.87779e+06	5.01158e+06	4.54557e+06	5.19267e+06	4.57468e+06	4.29037e+06	5.08413e+06	4.47615e+06	4.22714e+06	4.56165e+06	4.73848e+06	4.32641e+06	5.06688e+06	4.59838e+06	4.27937e+06	4.98422e+06	4.74925e+06	4.34522e+06	5.04163e+06	4.7303e+06	4.29281e+06
720	258.113	258.11	258.131	443.798	415.6	446.114	169	36	36	36	9	36	16	3.62514e+07	3.75251e+07	3.91444e+07	3.49751e+07	4.18441e+07	5.07127e+07	6.9993e+06	6.83932e+07	4.92593e+07	5.0352e+07	5.53195e+07	6.00358e+07	6.4306e+07	6.94026e+07	8.94056e+07	7.4773e+07	9.704e+07	1.00316e+08	3.31464e+07	3.54752e+07	2.71077e+07	3.2998e+07	3.49829e+07	2.48644e+07	3.38615e+07	5.76506e+07	6.06489e+07	3.02661e+07	3.53639e+07	4.15208e+07	3.95162e+07	4.69305e+07	5.30621e+07	7.70502e+07	8.75332e+07	9.40685e+07
721	258.109	258.109	258.112	216.506	215.747	217.189	138	27	29	34	0	33	15	1.09734e+07	1.04955e+07	1.02113e+07	9.24532e+06	9.58327e+06	1.01899e+07	1.87525e+06	4.78099e+06	3.83234e+06	8.14676e+06	8.24993e+06	8.04911e+06	5.27616e+06	4.85051e+06	5.14789e+06	5.85797e+06	5.6508e+06	5.78259e+06	4.81031e+06	4.56497e+06	4.57643e+06	4.60501e+06	4.46187e+06	4.33389e+06	2.17754e+06	3.90793e+06	3.82297e+06	5.3823e+06	5.56955e+06	5.53709e+06	3.9984e+06	3.91575e+06	4.04522e+06	4.79143e+06	4.6304e+06	4.61737e+06
722	258.114	258.095	258.155	344.75	332.497	359.5	157	34	34	31	9	35	14	1.6307e+07	1.54113e+07	1.71792e+07	1.61554e+07	2.14559e+07	2.73893e+07	3.17357e+06	1.51079e+07	1.594e+07	1.29642e+07	8.70653e+06	1.31134e+07	8.01312e+06	1.27552e+07	1.96981e+07	1.0916e+07	1.18366e+07	1.78391e+07	3.40321e+07	4.01571e+07	4.16251e+07	2.56793e+07	2.97428e+07	3.43495e+07	2.45046e+06	1.95652e+07	2.12626e+07	2.73898e+07	3.19876e+07	3.3833e+07	2.12938e+07	2.31002e+07	2.7447e+07	2.29553e+07	2.13871e+07	2.65651e+07
723	258.192	258.162	258.193	524.513	523.857	524.947	96	17	24	20	1	20	14	1.01824e+07	9.18932e+06	4.52609e+06	9.94405e+06	9.55527e+06	1.03313e+07	73888	3.40714e+06	1.91045e+06	9.25881e+06	4.46145e+06	4.31122e+06	2.19415e+06	3.32746e+06	3.48893e+06	2.68038e+06	5.18414e+06	4.51045e+06	9.94339e+06	4.80668e+06	4.42125e+06	9.15295e+06	3.95067e+06	3.31978e+06	515296	3.51793e+06	3.03292e+06	9.7467e+06	9.08983e+06	5.00097e+06	4.9262e+06	4.10798e+06	3.94414e+06	5.73259e+06	5.11623e+06	4.91618e+06
724	259.005	258.995	259.067	383.329	375.015	384.964	167	36	36	34	9	36	16	7.78108e+06	7.19614e+06	6.39448e+06	7.81386e+06	8.11543e+06	8.17827e+06	1.80808e+06	5.72262e+06	3.59626e+06	8.18522e+06	8.37181e+06	7.71777e+06	8.15717e+06	5.3665e+06	5.92561e+06	1.01124e+07	6.83041e+06	6.68337e+06	6.75524e+06	6.34955e+06	5.94388e+06	6.50158e+06	6.09817e+06	5.19719e+06	2.05608e+06	5.95638e+06	4.73919e+06	7.04181e+06	7.04799e+06	6.60306e+06	6.23902e+06	5.94429e+06	5.69292e+06	6.95561e+06	6.5398e+06	6.23693e+06
725	259.069	259.069	259.07	332.871	316.899	340.003	167	36	36	34	9	36	16	2.18424e+07	2.0929e+07	2.02391e+07	2.22027e+07	2.16067e+07	2.23671e+07	5.26553e+06	1.77602e+07	1.41697e+07	1.913e+07	1.89077e+07	1.97108e+07	1.92758e+07	1.6804e+07	1.84836e+07	1.41615e+07	2.17553e+07	2.17766e+07	2.4055e+07	2.36265e+07	2.41188e+07	2.25768e+07	2.4677e+07	2.20654e+07	8.45647e+06	1.91091e+07	2.79047e+07	2.5387e+07	2.54858e+07	2.50495e+07	2.144e+07	2.11581e+07	2.17986e+07	2.31226e+07	2.27404e+07	2.26749e+07
726	259.113	259.1	259.136	443.604	415.6	446.114	143	29	21	35	9	33	16	3.42135e+06	3.46396e+06	3.32752e+06	3.08871e+06	3.71853e+06	4.4198e+06	666457	6.21237e+06	4.15162e+06	4.28716e+06	4.88463e+06	5.31756e+06	5.72458e+06	5.92015e+06	7.49081e+06	6.47655e+06	8.16258e+06	8.32181e+06	1.42736e+06	1.71478e+06	2.67723e+06	1.61641e+06	1.58867e+06	2.06861e+06	1.55674e+06	4.8583e+06	5.31759e+06	2.77692e+06	3.05872e+06	3.54665e+06	3.32686e+06	4.41561e+06	4.76421e+06	6.59377e+06	7.23682e+06	7.82865e+06
727	259.166	259.117	259.205	73.5971	70.6176	99.0187	147	35	23	34	9	30	16	2.79115e+06	2.70911e+06	2.67267e+06	3.8024e+06	4.12356e+06	4.50343e+06	937328	862742	731292	700960	718596	686991	1.60319e+06	1.93989e+06	2.16592e+06	5.80206e+06	5.58711e+06	5.94344e+06	3.81738e+06	3.80062e+06	3.84082e+06	3.31387e+06	3.34633e+06	3.33356e+06	2.67975e+06	4.87193e+06	4.89429e+06	2.05711e+06	2.13423e+06	2.12412e+06	2.87617e+06	2.80738e+06	2.93914e+06	2.82464e+06	2.75842e+06	2.57583e+06
728	259.165	259.163	259.166	158.337	157.075	159.528	39	28	1	10	0	0	0	275183	425009	560069	328390	564600	827254	368404	795533	769470	219288	405479	620992	713909	678281	936299	637963	739110	894087	1.14173e+06	1.44305e+06	1.84482e+06	928516	1.18099e+06	1.47328e+06	475068	1.02784e+06	1.30966e+06	906828	1.34361e+06	1.69048e+06	1.06416e+06	1.24732e+06	1.5218e+06	875285	1.05594e+06	1.43211e+06
729	259.988	259.984	259.997	501.089	496.884	503.693	167	36	36	34	9	36	16	6.64733e+06	6.67444e+06	6.66171e+06	6.61873e+06	6.84614e+06	7.12281e+06	7.34392e+06	6.47077e+06	5.97156e+06	6.60287e+06	6.68776e+06	6.78069e+06	9.91191e+06	6.26249e+06	6.53188e+06	9.85507e+06	6.80687e+06	6.72523e+06	6.81194e+06	6.67987e+06	6.7003e+06	6.67718e+06	6.54042e+06	6.55588e+06	4.71895e+06	6.55181e+06	6.47228e+06	6.86048e+06	6.89576e+06	6.77099e+06	5.98535e+06	6.39837e+06	6.44362e+06	6.15712e+06	6.63547e+06	6.50361e+06
730	259.994	259.992	260.003	385.266	384.056	386.257	165	35	36	34	9	36	15	8.53827e+06	8.62501e+06	8.26177e+06	8.3229e+06	9.62649e+06	9.69639e+06	744882	6.95807e+06	4.7587e+06	8.12877e+06	8.41985e+06	8.65763e+06	7.48657e+06	7.09884e+06	7.62809e+06	8.57852e+06	8.72243e+06	8.79209e+06	8.33295e+06	8.64379e+06	8.04328e+06	8.12395e+06	7.62915e+06	7.26827e+06	1.81705e+06	7.28983e+06	6.52443e+06	8.14029e+06	8.38315e+06	8.40371e+06	7.55866e+06	7.8483e+06	7.69186e+06	7.62236e+06	8.70682e+06	8.62924e+06
731	260.055	260.053	260.062	328.784	326.606	333.992	165	34	36	34	9	36	16	1.72506e+07	1.73753e+07	1.65046e+07	1.60223e+07	1.77207e+07	2.017e+07	906783	5.36628e+06	3.5913e+06	1.01392e+07	1.01452e+07	1.05476e+07	6.45583e+06	5.50918e+06	6.36144e+06	7.65307e+06	7.07845e+06	7.28937e+06	6.8984e+06	6.61745e+06	6.32641e+06	7.52395e+06	7.4554e+06	6.88466e+06	1.37391e+06	4.85261e+06	4.5037e+06	8.48778e+06	8.52521e+06	8.50975e+06	5.25213e+06	5.08741e+06	4.99634e+06	6.06766e+06	5.97477e+06	6.12928e+06
732	260.114	260.112	260.116	443.064	441.633	443.694	18	2	1	4	8	3	0	390423	355677	388441	398059	550406	555471	196205	1.00623e+06	603248	750921	715932	671818	743587	922041	1.0742e+06	773352	1.03262e+06	1.40229e+06	210847	272785	310262	269052	304114	222274	193865	604377	514964	212980	288015	298400	349291	406476	466477	827797	1.00112e+06	1.084e+06
733	260.184	260.17	260.185	298.663	293.004	300.636	167	36	36	34	9	36	16	4.06647e+06	3.79257e+06	3.76517e+06	4.06244e+06	4.25977e+06	3.78634e+06	1.13459e+06	3.16873e+06	2.60861e+06	4.5915e+06	4.78772e+06	4.61777e+06	3.21693e+06	3.2098e+06	3.36775e+06	3.42555e+06	3.76455e+06	3.88431e+06	3.40431e+06	3.32507e+06	3.20102e+06	3.19844e+06	3.34977e+06	3.17218e+06	1.65412e+06	2.89037e+06	2.74962e+06	3.95317e+06	3.74412e+06	3.84756e+06	3.02311e+06	3.05186e+06	2.96437e+06	3.34171e+06	3.20877e+06	3.16002e+06
734	261.018	261.013	261.025	66.238	63.6332	66.8867	52	29	0	14	9	0	0	3.70075e+06	3.24267e+06	3.07493e+06	3.18622e+06	2.93502e+06	2.74917e+06	2.58895e+06	1.59242e+06	1.72129e+06	3.21931e+06	2.91918e+06	2.77246e+06	1.60877e+06	1.02632e+06	744008	2.66257e+06	1.47212e+06	1.49139e+06	1.90547e+06	1.89969e+06	1.85538e+06	1.88687e+06	1.69086e+06	1.77178e+06	1.54252e+06	1.18579e+06	1.17576e+06	2.52709e+06	2.4157e+06	2.56443e+06	1.2305e+06	1.13603e+06	1.13202e+06	1.70057e+06	1.53455e+06	1.57506e+06
735	261.131	261.131	261.131	616.296	581.983	622.944	170	36	36	36	9	36	16	1.60667e+07	1.397e+07	1.36714e+07	1.67664e+07	1.54456e+07	1.638e+07	1.2051e+07	1.96325e+07	1.6066e+07	1.49611e+07	1.37374e+07	1.43197e+07	2.53134e+07	1.94654e+07	2.03134e+07	2.95676e+07	2.08466e+07	2.06568e+07	2.45775e+07	2.33532e+07	2.30156e+07	2.23612e+07	2.08152e+07	2.11451e+07	1.97096e+07	2.26806e+07	2.16688e+07	2.2719e+07	2.28601e+07	2.3194e+07	3.50355e+07	2.50659e+07	2.52656e+07	3.5604e+07	2.72273e+07	2.70799e+07
736	261.129	261.099	261.132	102.098	99.3691	123	153	35	36	24	6	36	16	3.72908e+06	3.61075e+06	3.67546e+06	9.44839e+06	1.07378e+07	1.16193e+07	7.35318e+06	4.39712e+06	4.47216e+06	4.98686e+06	4.8833e+06	4.98559e+06	9.33311e+06	7.35244e+06	7.381e+06	1.05559e+07	8.23504e+06	8.59779e+06	1.61364e+07	1.5754e+07	1.55883e+07	6.64395e+06	6.30068e+06	6.28801e+06	6.59259e+06	6.79795e+06	6.42328e+06	3.22306e+06	3.08728e+06	2.98614e+06	7.16729e+06	6.78884e+06	6.58166e+06	2.17647e+06	3.38732e+06	3.21465e+06
737	261.068	261.051	261.079	432.241	430.645	434.889	167	36	36	34	9	36	16	1.5066e+07	1.47043e+07	1.41653e+07	1.47428e+07	1.58427e+07	1.67119e+07	3.09868e+06	1.16902e+07	9.4893e+06	1.49682e+07	1.50446e+07	1.52147e+07	9.83344e+06	1.1039e+07	1.19581e+07	1.14325e+07	1.33032e+07	1.32135e+07	1.27126e+07	1.25984e+07	1.21845e+07	1.19704e+07	1.19815e+07	1.15324e+07	5.77482e+06	1.11081e+07	1.05701e+07	1.44411e+07	1.46784e+07	1.48767e+07	1.0971e+07	1.11735e+07	1.07876e+07	1.22907e+07	1.22697e+07	1.22141e+07
738	261.188	261.186	261.19	298.961	297.326	300.646	161	34	35	34	9	34	15	494789	423553	482105	526840	445482	510230	127064	405764	269785	604718	540775	566057	351037	399884	430049	396435	496570	378169	427088	370113	335259	357577	340059	347527	166145	297488	309645	465704	492808	442690	357406	360046	299593	335639	405992	368584
739	261.2	261.051	261.201	496.087	494.332	528.622	74	14	18	13	2	16	9	607685	515272	457743	512911	507016	454326	11319.1	233274	153619	410564	370894	355099	3.76163e+06	159005	170540	11190.3	299855	266695	122336	103550	89515.8	54250.5	5.59652e+06	65350.7	10809.3	31247	32837.2	185159	133285	109686	43044.4	45005.2	31029.4	68660	60626.2	64207.2
740	262.05	262.027	262.125	374.254	365.615	378.671	167	36	36	34	9	36	16	5.59373e+06	5.31012e+06	6.39553e+06	3.26929e+06	4.653e+06	5.07326e+06	1.64118e+06	4.01862e+06	2.51629e+06	3.39448e+06	4.60224e+06	5.43339e+06	6.13609e+06	3.61175e+06	2.97368e+06	7.86779e+06	4.28362e+06	4.97879e+06	4.95363e+06	5.8433e+06	6.4791e+06	5.08638e+06	5.15846e+06	5.86526e+06	2.14109e+06	4.48803e+06	5.46563e+06	4.68949e+06	5.40664e+06	6.0573e+06	4.55848e+06	5.09713e+06	5.48962e+06	4.69211e+06	5.02598e+06	5.61541e+06
741	262.128	262.125	262.13	500.504	496.68	502.006	136	33	31	29	1	28	14	1.05943e+06	1.07364e+06	1.06534e+06	1.18638e+06	1.3037e+06	1.48601e+06	338861	922591	676064	1.05716e+06	1.10714e+06	1.0871e+06	1.01081e+06	884310	1.01194e+06	1.25649e+06	1.2366e+06	1.21155e+06	1.4541e+06	1.4098e+06	1.28764e+06	1.14137e+06	1.1189e+06	1.08251e+06	312595	1.00222e+06	969371	1.41456e+06	1.45011e+06	1.57163e+06	1.06705e+06	1.12051e+06	1.16984e+06	1.24834e+06	1.26486e+06	1.35931e+06
742	262.133	261.994	262.135	615.333	612.911	636.866	62	20	14	10	9	6	3	1.34542e+06	1.28768e+06	1.33964e+06	1.51862e+06	1.47967e+06	1.56264e+06	486811	1.38128e+06	1.19489e+06	1.45292e+06	1.41707e+06	1.42262e+06	1.68413e+06	1.37712e+06	1.394e+06	2.12453e+06	1.82702e+06	1.63182e+06	1.68967e+06	2.05387e+06	1.94952e+06	1.57707e+06	1.44025e+06	1.45616e+06	1.46395e+06	1.65368e+06	1.51446e+06	2.37007e+06	1.49698e+06	2.03177e+06	2.88164e+06	1.796e+06	1.87548e+06	2.74697e+06	2.81055e+06	1.99144e+06
743	262.053	262.033	262.153	431.226	424.977	432.994	93	22	16	21	4	18	12	1.14859e+06	1.01649e+06	1.00634e+06	1.00345e+06	1.25548e+06	1.31172e+06	129576	849382	666754	1.11111e+06	1.12118e+06	1.18615e+06	758108	736505	886641	851595	1.0007e+06	990303	1.02454e+06	1.04304e+06	1.03352e+06	984667	972630	856140	350337	823141	849984	1.12282e+06	1.17241e+06	1.2759e+06	833400	875090	895400	934567	1.00239e+06	936360
744	262.134	262.124	262.233	102.837	71.9711	120.988	93	9	32	5	0	31	15	550077	495202	485470	1.05185e+06	1.12789e+06	1.14354e+06	950700	524067	472127	594452	508658	509445	629312	669668	644893	1.48483e+06	988499	1.0505e+06	2.47834e+06	1.61037e+06	1.3997e+06	1.02403e+06	1.22615e+06	1.17059e+06	747420	623845	465725	452481	405552	490360	640205	628298	575897	438716	438261	446321
745	262.889	262.888	262.889	501.243	496.685	503.693	167	36	36	34	9	36	16	1.45439e+07	1.48977e+07	1.46751e+07	1.4332e+07	1.48353e+07	1.48312e+07	8.65043e+06	1.43849e+07	1.40328e+07	1.44415e+07	1.4977e+07	1.43768e+07	1.10194e+07	1.43007e+07	1.44986e+07	1.21253e+07	1.4811e+07	1.49431e+07	1.43953e+07	1.47287e+07	1.43954e+07	1.45252e+07	1.35026e+07	1.45091e+07	1.205e+07	1.44524e+07	1.45581e+07	1.46002e+07	1.4914e+07	1.49793e+07	1.40625e+07	1.44232e+07	1.44641e+07	1.42268e+07	1.46303e+07	1.48193e+07
746	263.146	263.08	263.146	628.258	601.048	632.323	169	36	36	36	9	36	16	3.95709e+08	3.10676e+08	2.86038e+08	4.20526e+08	3.69474e+08	3.78085e+08	2.56592e+08	3.47691e+08	2.44654e+08	3.69222e+08	3.07252e+08	2.97066e+08	5.51641e+08	3.42789e+08	3.42904e+08	6.38381e+08	4.07467e+08	3.70027e+08	5.27157e+08	4.62855e+08	4.5005e+08	4.62205e+08	4.13634e+08	3.8757e+08	4.42678e+08	4.05846e+08	3.74067e+08	5.026e+08	4.70082e+08	4.74656e+08	7.99494e+08	4.50395e+08	4.34544e+08	8.12919e+08	5.04574e+08	4.81352e+08
747	263.096	263.096	263.096	222.095	221.506	222.863	139	32	30	26	9	30	12	3.92058e+07	3.7723e+07	3.71725e+07	3.82999e+07	4.21155e+07	4.63944e+07	1.3784e+07	3.43937e+07	2.66681e+07	3.64345e+07	3.61278e+07	3.7379e+07	3.72067e+07	3.36443e+07	3.80391e+07	3.9398e+07	4.0818e+07	4.0385e+07	5.39405e+07	5.12996e+07	5.13008e+07	4.08356e+07	3.93902e+07	3.99253e+07	1.7438e+07	3.82438e+07	3.81911e+07	4.14975e+07	4.23213e+07	4.42319e+07	4.34071e+07	4.41846e+07	4.43957e+07	4.22207e+07	4.17048e+07	4.1442e+07
748	263.236	263.184	263.237	69.5662	66.514	72.7658	123	16	36	16	3	36	16	7.45397e+06	4.65232e+06	3.23325e+06	7.79512e+06	4.98882e+06	3.48431e+06	1.11954e+07	5.73765e+06	3.80032e+06	8.08696e+06	5.12132e+06	3.67228e+06	1.03665e+07	5.15649e+06	3.16018e+06	1.0918e+06	997406	1.0016e+06	732835	690698	691925	4.60219e+06	4.55991e+06	4.54662e+06	602748	1.12873e+06	1.07263e+06	515489	547895	514321	1.05585e+07	1.09468e+06	7.71024e+06	8.66977e+06	5.25699e+06	3.33177e+06
749	263.171	263.171	263.173	437.962	432.204	441.173	67	26	0	32	9	0	0	1.60707e+06	1.49168e+06	1.39152e+06	1.58354e+06	1.38331e+06	1.20447e+06	1.22018e+06	1.23052e+06	1.11176e+06	1.58137e+06	1.48059e+06	1.39078e+06	1.9624e+06	1.19491e+06	1.19266e+06	2.09814e+06	1.22647e+06	1.29028e+06	1.16921e+06	1.16333e+06	989659	1.34546e+06	1.16588e+06	1.18853e+06	1.04388e+06	1.07997e+06	1.04064e+06	1.53632e+06	1.32516e+06	1.25162e+06	1.36142e+06	1.06137e+06	1.01541e+06	1.28705e+06	1.13058e+06	975905
750	264.096	264.087	264.1	303.634	285.378	305.409	167	36	36	34	9	36	16	1.39287e+07	1.38754e+07	1.33283e+07	1.3316e+07	1.34903e+07	1.3648e+07	6.92696e+06	1.11131e+07	1.02209e+07	1.31841e+07	1.35551e+07	1.32369e+07	1.42e+07	1.06481e+07	1.16727e+07	1.63683e+07	1.19577e+07	1.24884e+07	1.14295e+07	1.14831e+07	1.18161e+07	1.14935e+07	1.15699e+07	1.18821e+07	8.0909e+06	1.07013e+07	9.16363e+06	1.2382e+07	1.2966e+07	1.28331e+07	1.14238e+07	1.08557e+07	1.06967e+07	1.19508e+07	1.13223e+07	1.17169e+07
751	264.15	264.12	264.15	628.249	600.859	632.323	169	36	36	36	9	36	16	3.18513e+07	2.47547e+07	2.31204e+07	3.38523e+07	3.00198e+07	3.02254e+07	2.06408e+07	2.78859e+07	1.97654e+07	3.0065e+07	2.46921e+07	2.41167e+07	4.44718e+07	2.72839e+07	2.80455e+07	5.18439e+07	3.30138e+07	2.96279e+07	4.26386e+07	3.71665e+07	3.62582e+07	3.74444e+07	3.32317e+07	3.10384e+07	3.58263e+07	3.27104e+07	3.04128e+07	4.04119e+07	3.77339e+07	3.84648e+07	6.54716e+07	3.61684e+07	3.49779e+07	6.64545e+07	4.09074e+07	3.89385e+07
752	264.1	264.099	264.1	222.163	221.506	222.845	139	32	30	26	9	30	12	4.45117e+06	4.57272e+06	4.40819e+06	4.59246e+06	4.83381e+06	5.40951e+06	1.92863e+06	4.14994e+06	3.29259e+06	4.42866e+06	4.23318e+06	4.50803e+06	4.60009e+06	4.01225e+06	4.40846e+06	4.84395e+06	4.89839e+06	4.94372e+06	6.40072e+06	6.0443e+06	6.10118e+06	4.80513e+06	4.78174e+06	4.56153e+06	2.21962e+06	4.70571e+06	4.50709e+06	4.91779e+06	4.91362e+06	5.18059e+06	5.05738e+06	5.26171e+06	5.01371e+06	5.17367e+06	5.05567e+06	4.76179e+06
753	264.238	264.159	264.241	69.9867	66.2409	71.1666	166	36	36	33	9	36	16	7.01462e+06	6.67528e+06	6.52146e+06	1.20502e+07	1.33359e+07	1.43805e+07	1.59911e+06	4.45338e+06	3.23237e+06	6.78078e+06	6.46947e+06	6.63824e+06	2.96779e+06	2.40261e+06	2.19763e+06	2.27249e+06	2.07356e+06	2.05214e+06	4.41096e+06	4.20397e+06	3.85883e+06	2.50176e+06	2.58467e+06	2.528e+06	1.41326e+06	3.35223e+06	3.15275e+06	6.48152e+06	6.04565e+06	6.23303e+06	2.30658e+06	2.04663e+06	1.99533e+06	9.06201e+06	8.54656e+06	8.62045e+06
754	264.889	264.884	264.983	499.562	461.717	502.394	168	36	36	34	9	36	16	1.22143e+06	1.21636e+06	1.20722e+06	1.13895e+06	1.19796e+06	1.15458e+06	806239	1.15645e+06	1.12078e+06	1.15156e+06	1.17868e+06	1.14674e+06	955251	1.13898e+06	1.17323e+06	1.07071e+06	1.14321e+06	1.16483e+06	1.21565e+06	1.20366e+06	1.13844e+06	1.15935e+06	1.06332e+06	1.18392e+06	1.00072e+06	1.12139e+06	1.13449e+06	1.1558e+06	1.23691e+06	1.2141e+06	1.1608e+06	1.13219e+06	1.08887e+06	1.19764e+06	1.167e+06	1.1868e+06
755	265.008	265.006	265.009	532.642	530.434	535.88	103	21	24	18	9	19	12	258175	167920	251858	366643	423797	522119	170170	1.13633e+06	821717	271599	267307	211854	649806	1.1946e+06	1.23097e+06	556911	1.55889e+06	1.16163e+06	1.09544e+06	1.05755e+06	819461	968052	868085	783703	259787	1.31541e+06	1.21853e+06	953541	1.09084e+06	1.00808e+06	1.1876e+06	1.55934e+06	1.4805e+06	1.48738e+06	1.69594e+06	1.77088e+06
756	265.112	265.111	265.113	387.508	384.681	388.261	169	36	36	36	9	36	16	8.87065e+08	7.82431e+08	6.96902e+08	8.22166e+08	7.15546e+08	6.46012e+08	3.75564e+08	5.85312e+08	4.046e+08	8.97982e+08	8.17025e+08	7.53072e+08	7.41593e+08	5.94939e+08	5.2012e+08	8.03806e+08	6.58023e+08	5.15377e+08	5.65355e+08	3.9903e+08	2.92695e+08	5.90528e+08	4.42951e+08	3.34363e+08	3.62962e+08	4.2615e+08	2.86707e+08	7.57547e+08	5.99751e+08	4.85023e+08	5.60576e+08	3.88103e+08	2.60935e+08	6.16229e+08	4.34619e+08	3.02091e+08
757	265.151	265.151	265.154	628.334	602.49	632.197	163	35	36	34	6	36	16	2.60312e+06	1.94998e+06	1.89681e+06	2.94202e+06	2.38984e+06	2.55245e+06	1.56238e+06	2.20703e+06	1.5031e+06	2.35685e+06	1.94053e+06	1.85105e+06	3.57543e+06	2.25839e+06	2.15322e+06	4.40678e+06	2.73757e+06	2.42486e+06	3.54289e+06	3.20925e+06	2.94808e+06	3.10634e+06	2.79644e+06	2.48403e+06	3.01926e+06	2.62314e+06	2.42942e+06	3.23171e+06	3.07646e+06	3.07701e+06	5.59829e+06	2.91591e+06	2.84902e+06	5.57463e+06	3.54082e+06	3.22599e+06
758	265.19	265.124	265.25	70.1651	66.4404	102.548	117	27	19	28	9	22	11	948035	844575	856821	1.54775e+06	1.69712e+06	1.94664e+06	247381	592886	492763	929992	904135	924013	162349	90345.8	90361.5	575196	597228	598109	558617	734222	596347	519185	461083	523220	368210	753786	652341	849128	833557	841732	171458	150803	169449	1.02305e+06	1.13084e+06	1.11021e+06
759	266.113	266.08	266.115	387.325	382.938	388.053	168	36	36	35	9	36	16	1.09487e+08	9.63871e+07	8.53682e+07	1.00821e+08	8.81619e+07	8.09489e+07	4.57973e+07	7.24575e+07	5.03418e+07	1.11269e+08	1.00603e+08	9.37117e+07	8.83064e+07	7.22971e+07	6.41134e+07	9.63829e+07	7.89388e+07	6.23328e+07	6.78488e+07	4.89448e+07	3.61538e+07	7.11892e+07	5.35638e+07	4.05854e+07	4.64995e+07	5.20288e+07	3.51386e+07	9.1494e+07	7.32992e+07	5.95792e+07	6.82999e+07	4.78727e+07	3.27376e+07	7.50065e+07	5.26304e+07	3.74663e+07
760	266.083	266.074	266.09	316.686	313.75	318.461	78	14	13	15	9	12	15	3.37656e+06	3.18693e+06	2.74333e+06	1.66961e+06	1.71709e+06	2.00764e+06	1.73618e+06	2.93499e+06	3.22632e+06	1.71881e+06	1.77972e+06	1.81109e+06	5.36587e+06	4.48582e+06	5.71589e+06	4.33874e+06	4.40158e+06	4.27191e+06	3.81321e+06	3.54665e+06	3.36026e+06	2.43985e+06	2.2766e+06	2.16842e+06	5.58397e+06	7.06121e+06	5.12537e+06	3.07066e+06	3.13708e+06	3.07531e+06	9.4286e+06	8.35439e+06	7.62992e+06	1.12298e+07	1.0975e+07	1.01679e+07
761	266.192	266.175	266.197	73.115	70.584	81.0435	77	36	0	32	9	0	0	1.4782e+06	1.39846e+06	1.38308e+06	2.57252e+06	2.70251e+06	2.94455e+06	699977	1.40163e+06	1.0756e+06	1.54189e+06	1.51773e+06	1.61849e+06	754628	952550	900584	1.05977e+06	1.09005e+06	1.07884e+06	2.45397e+06	2.14765e+06	2.17589e+06	1.07675e+06	934317	933876	736900	1.2507e+06	1.26533e+06	1.28725e+06	1.17637e+06	1.30624e+06	390447	334552	389552	1.57902e+06	1.44983e+06	1.47267e+06
762	266.161	266.161	266.166	426.947	425.727	428.164	37	11	9	0	9	3	5	119538	150799	219664	188120	466612	1.0894e+06	78800.7	175784	153188	90542.5	125457	234333	255420	85383.8	185258	330558	169277	243287	305499	350395	533097	256960	414101	503939	98510.4	280403	416978	225942	327239	481183	242230	389752	503273	203583	289785	358352
763	267.107	267.106	267.109	387.523	386.423	388.261	167	36	36	34	9	36	16	3.64694e+07	3.20251e+07	2.80528e+07	3.41672e+07	2.90753e+07	2.56646e+07	1.68854e+07	2.39598e+07	1.60172e+07	3.70521e+07	3.28422e+07	3.08008e+07	2.99679e+07	2.3978e+07	2.1014e+07	3.23074e+07	2.67538e+07	2.04162e+07	2.29164e+07	1.59075e+07	1.16095e+07	2.36108e+07	1.80777e+07	1.33502e+07	1.47855e+07	1.68916e+07	1.09671e+07	3.06515e+07	2.43335e+07	1.9325e+07	2.27322e+07	1.55224e+07	1.02334e+07	2.53598e+07	1.74698e+07	1.16404e+07
764	267.064	267.061	267.066	529.003	527.158	529.771	167	36	36	34	9	36	16	5.33558e+06	5.63824e+06	5.45794e+06	5.39773e+06	5.46126e+06	5.70251e+06	5.20099e+06	4.85904e+06	4.68023e+06	5.39124e+06	5.26689e+06	5.41012e+06	6.81994e+06	5.08017e+06	4.86649e+06	7.10527e+06	5.22092e+06	4.9833e+06	5.20971e+06	5.13614e+06	5.24058e+06	5.26042e+06	4.98916e+06	5.45027e+06	4.09561e+06	4.96449e+06	4.86655e+06	5.26774e+06	5.2331e+06	5.35823e+06	5.15034e+06	5.09747e+06	5.05007e+06	4.92632e+06	4.90822e+06	4.92694e+06
765	267.145	267.144	267.145	140.975	138.896	142.724	167	36	36	34	9	36	16	4.67345e+07	5.05749e+07	5.4856e+07	4.77554e+07	5.7461e+07	6.95152e+07	1.69647e+07	4.53725e+07	4.07374e+07	4.06879e+07	4.39815e+07	4.94216e+07	4.61187e+07	4.02155e+07	4.92545e+07	5.38428e+07	5.54319e+07	6.26716e+07	7.07261e+07	7.81634e+07	8.4945e+07	5.45258e+07	6.10127e+07	6.50122e+07	2.16122e+07	4.79478e+07	5.34212e+07	6.198e+07	7.18104e+07	8.20886e+07	5.24667e+07	5.6382e+07	6.14588e+07	5.4092e+07	5.87065e+07	6.30005e+07
766	267.048	267.047	267.048	633.039	629.867	637.567	167	36	36	34	9	36	16	1.47479e+07	1.30314e+07	1.27431e+07	1.54331e+07	1.58276e+07	1.8022e+07	5.53496e+06	7.47348e+06	5.29639e+06	1.53735e+07	1.4612e+07	1.51622e+07	2.45795e+07	9.97913e+06	1.16438e+07	2.63145e+07	1.25826e+07	1.25036e+07	1.95824e+07	1.86949e+07	1.82283e+07	1.69626e+07	1.63829e+07	1.57329e+07	6.44849e+06	1.44472e+07	1.40201e+07	2.13926e+07	2.14962e+07	2.24923e+07	2.08038e+07	1.6624e+07	1.64937e+07	2.36151e+07	1.93312e+07	1.92374e+07
767	267.025	267.019	267.03	445.83	443.109	448.111	142	33	31	28	7	29	14	2.69839e+06	2.42212e+06	2.57113e+06	2.56007e+06	2.39559e+06	2.35041e+06	2.58767e+06	2.57778e+06	2.24132e+06	2.46025e+06	2.51286e+06	2.43199e+06	4.13511e+06	2.46779e+06	2.49729e+06	4.03993e+06	2.66471e+06	2.63492e+06	2.54451e+06	2.6946e+06	2.505e+06	2.60782e+06	2.63974e+06	2.43559e+06	2.07788e+06	2.48137e+06	2.38061e+06	2.51052e+06	2.47188e+06	2.4294e+06	2.45489e+06	2.59786e+06	2.47158e+06	2.64879e+06	2.49528e+06	2.39183e+06
768	267.168	267.142	267.183	66.9306	61.5317	71.0381	151	36	27	34	9	30	15	6.00339e+06	5.73531e+06	5.7594e+06	8.3303e+06	8.98764e+06	1.00161e+07	2.7e+06	5.61795e+06	4.66328e+06	6.48445e+06	6.58213e+06	6.832e+06	6.06518e+06	5.23761e+06	5.65175e+06	8.92358e+06	7.78981e+06	7.77746e+06	7.11275e+06	6.82738e+06	6.7801e+06	5.59035e+06	5.17863e+06	5.32863e+06	4.46652e+06	7.80756e+06	7.94279e+06	7.03523e+06	6.92417e+06	7.36852e+06	5.47203e+06	5.19544e+06	5.42014e+06	6.52215e+06	6.28521e+06	6.24378e+06
769	268.047	268.015	268.048	632.986	629.596	637.416	160	34	36	34	8	33	15	3.64351e+06	3.33152e+06	3.18755e+06	3.95608e+06	3.95527e+06	4.51842e+06	1.90501e+06	1.81184e+06	1.20776e+06	3.92736e+06	3.62839e+06	3.78428e+06	6.49905e+06	2.51957e+06	2.96632e+06	6.90361e+06	3.20905e+06	3.18142e+06	5.05074e+06	4.60751e+06	4.49995e+06	4.10112e+06	4.07997e+06	4.04823e+06	1.85374e+06	3.62958e+06	3.40067e+06	5.34887e+06	5.44174e+06	5.72583e+06	5.28587e+06	4.1566e+06	4.26949e+06	5.99915e+06	4.85569e+06	4.75198e+06
770	268.129	268.096	268.204	68.9713	64.9226	85.5039	163	34	36	32	9	36	16	1.07755e+06	1.11421e+06	1.09896e+06	1.68054e+06	1.83536e+06	2.00459e+06	525877	1.24607e+06	1.10835e+06	1.55798e+06	1.55371e+06	1.6188e+06	2.0601e+06	5.57026e+06	1.31066e+06	5.09287e+06	4.58184e+06	4.45131e+06	4.40811e+06	4.28739e+06	4.39885e+06	2.66197e+06	2.53199e+06	2.81645e+06	1.8202e+06	3.26823e+06	3.22505e+06	1.2711e+06	1.31551e+06	1.31665e+06	1.53214e+06	1.59604e+06	1.38917e+06	1.22396e+06	1.13997e+06	1.2401e+06
771	268.113	268.07	268.178	374.489	349.462	388.141	165	35	35	33	9	36	15	1.11984e+06	1.01936e+07	885159	1.00891e+06	944159	1.02511e+06	2.8311e+06	730121	699825	993971	719096	705774	3.85781e+06	9.16083e+06	833673	5.29842e+06	1.01894e+07	8.47084e+06	8.93296e+06	7.63856e+06	7.86343e+06	9.45955e+06	8.45286e+06	8.2339e+06	5.03609e+06	8.15315e+06	1.72536e+07	1.04139e+07	9.90438e+06	8.18012e+06	9.24726e+06	7.76561e+06	6.55682e+06	9.2665e+06	7.76178e+06	7.12759e+06
772	268.138	268.132	268.185	138.998	136.058	166.297	107	24	36	10	0	26	11	7.24827e+06	7.39316e+06	7.95844e+06	7.32898e+06	8.19789e+06	9.46136e+06	2.81059e+06	7.07772e+06	6.54283e+06	6.51207e+06	6.8549e+06	7.29147e+06	5.87361e+06	6.60705e+06	7.47554e+06	6.87341e+06	7.86428e+06	8.86214e+06	9.98825e+06	1.08148e+07	1.13033e+07	8.02125e+06	8.77675e+06	9.15032e+06	5.13055e+06	7.14486e+06	7.83618e+06	8.81871e+06	9.90632e+06	1.12225e+07	7.81415e+06	8.46638e+06	8.92486e+06	7.94081e+06	8.60065e+06	9.1602e+06
773	268.998	268.998	268.999	406.165	405.864	416.074	169	36	36	36	9	36	16	1.26659e+10	1.2535e+10	1.24972e+10	1.26602e+10	1.32099e+10	1.38393e+10	6.45959e+09	1.16289e+10	1.03736e+10	1.25258e+10	1.27477e+10	1.27967e+10	1.28551e+10	1.12625e+10	1.20846e+10	1.3498e+10	1.27105e+10	1.28532e+10	1.30501e+10	1.30093e+10	1.29644e+10	1.24546e+10	1.25142e+10	1.24381e+10	7.32531e+09	1.17702e+10	1.18246e+10	1.33389e+10	1.36023e+10	1.37649e+10	1.20206e+10	1.23198e+10	1.23714e+10	1.25583e+10	1.27737e+10	1.29347e+10
774	269.123	269.071	269.148	509.921	507.19	513.661	133	29	36	23	0	30	15	2.38312e+06	2.38357e+06	2.22613e+06	2.51975e+06	2.80178e+06	2.93301e+06	817967	2.5565e+06	2.20207e+06	2.45073e+06	2.42701e+06	2.49102e+06	2.03595e+06	2.82012e+06	2.98409e+06	2.00361e+06	2.86981e+06	2.89684e+06	2.44702e+06	2.43325e+06	2.40411e+06	2.38693e+06	2.14643e+06	2.08923e+06	1.48726e+06	2.45217e+06	2.28133e+06	2.48481e+06	2.48507e+06	2.4617e+06	2.41449e+06	2.61826e+06	2.55641e+06	2.73664e+06	2.97123e+06	2.7376e+06
775	269.131	269.067	269.152	70.5122	64.6024	100.728	121	36	14	30	9	22	9	7.59066e+06	7.88452e+06	7.83486e+06	1.3483e+07	1.39004e+07	1.47326e+07	4.33086e+06	6.1009e+06	5.19515e+06	7.74786e+06	7.84291e+06	7.97674e+06	7.41651e+06	4.6744e+06	4.08505e+06	9.12706e+06	6.08983e+06	5.85594e+06	7.70594e+06	4.80932e+06	4.96356e+06	6.08504e+06	3.44058e+06	5.46836e+06	5.7263e+06	4.86227e+06	5.08551e+06	7.58197e+06	7.3765e+06	7.48392e+06	5.82499e+06	5.9882e+06	5.93714e+06	1.15825e+07	1.15812e+07	1.17288e+07
776	269.158	269.151	269.162	131.51	129.224	133.017	74	0	36	0	0	36	2	519838	515431	584219	507611	612377	602916	451460	462070	526379	453928	479513	522463	566026	437185	460677	650736	476986	490354	924243	936189	885960	814208	807492	772818	565979	686799	640417	824316	795949	836909	707656	713018	692122	712894	765239	709384
777	270.001	270.001	270.002	406.139	405.864	416.074	169	36	36	36	9	36	16	8.2121e+08	8.04625e+08	8.07125e+08	8.18298e+08	8.4937e+08	8.92503e+08	4.19451e+08	7.4552e+08	6.72149e+08	8.03139e+08	8.17805e+08	8.26596e+08	8.36437e+08	7.26452e+08	7.81579e+08	8.79909e+08	8.22431e+08	8.26763e+08	8.3977e+08	8.4104e+08	8.35634e+08	8.11188e+08	8.03069e+08	7.9933e+08	4.70395e+08	7.62986e+08	7.58319e+08	8.6363e+08	8.76514e+08	8.80106e+08	7.74958e+08	7.91562e+08	7.9672e+08	8.1327e+08	8.18972e+08	8.31679e+08
778	270.1	270.094	270.192	357.144	352.162	380.213	126	30	25	25	9	22	15	2.16823e+06	2.51131e+06	2.8117e+06	2.16923e+06	2.53261e+06	2.69034e+06	1.2691e+06	2.0909e+06	2.38339e+06	1.97642e+06	2.4756e+06	2.52206e+06	1.17835e+06	2.00774e+06	2.50939e+06	1.63525e+06	2.287e+06	2.85416e+06	3.00256e+06	2.60292e+06	2.87586e+06	2.34417e+06	3.29272e+06	3.6694e+06	1.618e+06	2.26131e+06	2.52224e+06	2.42932e+06	3.17885e+06	3.58209e+06	1.96552e+06	2.90119e+06	3.76631e+06	2.8543e+06	2.21443e+06	2.67406e+06
779	270.168	270.155	270.201	325.272	306.296	331.454	108	18	27	12	3	32	16	534427	647402	613892	843322	936751	923129	175891	543378	393065	512011	326888	580833	1.11086e+06	1.25168e+06	1.46824e+06	380177	722721	681346	1.06939e+06	1.03801e+06	1.18272e+06	662372	676006	663370	190220	679440	701772	529434	237063	206740	657249	760513	809349	299583	488388	578096
780	270.191	270.112	270.198	102.288	88.9385	155.543	114	12	33	8	9	33	16	174944	156920	198625	834458	846476	1.01661e+06	4.55454e+06	2.52823e+06	2.90097e+06	339810	390690	379348	5.43567e+06	2.25213e+06	362262	5.25503e+06	803863	836368	1.42771e+06	2.1813e+06	2.57933e+06	320352	345907	360837	3.57234e+06	565812	3.7202e+06	178584	207332	126304	436700	439118	445220	197713	123750	193203
781	270.193	270.141	270.221	76.6528	67.4123	81.8513	78	35	0	34	9	0	0	758743	1.39235e+06	799523	2.01912e+06	2.32672e+06	2.46155e+06	418040	1.01679e+06	789730	1.69646e+06	1.70278e+06	1.76654e+06	1.61611e+06	1.48852e+06	1.54317e+06	4.81258e+06	4.74055e+06	4.81268e+06	5.231e+06	5.32047e+06	5.23599e+06	2.07614e+06	2.1033e+06	2.12111e+06	1.56664e+06	2.76481e+06	2.80456e+06	968662	898742	956669	2.18652e+06	2.13054e+06	2.09765e+06	780349	1.66685e+06	722492
782	271.002	270.987	271.003	406.097	405.864	416.074	169	36	36	36	9	36	16	1.50113e+08	1.46737e+08	1.49028e+08	1.49107e+08	1.55136e+08	1.62558e+08	7.46715e+07	1.36133e+08	1.23426e+08	1.49737e+08	1.50967e+08	1.48283e+08	1.49884e+08	1.32485e+08	1.42141e+08	1.58813e+08	1.4814e+08	1.52848e+08	1.53328e+08	1.51026e+08	1.51508e+08	1.46477e+08	1.45344e+08	1.44514e+08	8.68988e+07	1.38754e+08	1.38215e+08	1.55819e+08	1.58447e+08	1.64714e+08	1.39418e+08	1.40331e+08	1.43098e+08	1.48002e+08	1.49522e+08	1.52832e+08
783	271.097	271.096	271.1	352.878	350.629	359.728	167	36	36	34	9	36	16	6.07124e+06	6.0923e+06	6.40393e+06	6.03041e+06	6.41331e+06	7.0498e+06	4.7449e+06	6.0612e+06	6.02741e+06	6.06057e+06	6.66648e+06	6.11745e+06	5.67585e+06	6.15187e+06	6.33384e+06	6.05638e+06	6.24469e+06	6.70745e+06	6.99909e+06	6.89868e+06	7.0716e+06	7.3896e+06	6.78556e+06	7.32897e+06	5.18307e+06	6.67667e+06	5.89209e+06	7.10139e+06	7.18238e+06	7.09443e+06	6.37696e+06	7.03043e+06	6.6046e+06	6.55957e+06	6.3728e+06	6.52942e+06
784	271.154	271.15	271.173	68.5043	66.5553	72.0343	96	35	0	31	9	6	15	2.4442e+06	2.46947e+06	2.48364e+06	3.05129e+06	3.24462e+06	3.53373e+06	1.09606e+06	2.08294e+06	1.79347e+06	2.57097e+06	2.61368e+06	2.5473e+06	1.37761e+07	1.32274e+07	1.48663e+07	1.33412e+06	2.10951e+06	2.02336e+06	4.4557e+06	4.40458e+06	4.34004e+06	1.84839e+06	1.80194e+06	1.7153e+06	1.6437e+06	2.78053e+06	2.71754e+06	2.22716e+06	2.20678e+06	2.24965e+06	1.12512e+07	1.11591e+07	1.10118e+07	3.30261e+06	3.19126e+06	3.18116e+06
785	272.006	272.005	272.007	405.885	405.192	406.601	161	36	33	31	9	36	16	8.59321e+06	8.13259e+06	8.06698e+06	7.24429e+06	7.33707e+06	8.60489e+06	3.86639e+06	6.72544e+06	6.51962e+06	7.77753e+06	7.68594e+06	8.02673e+06	8.34298e+06	6.4291e+06	7.44501e+06	9.02634e+06	7.4061e+06	6.96653e+06	8.12103e+06	6.80753e+06	7.22449e+06	7.91003e+06	8.14519e+06	8.64862e+06	4.75823e+06	7.29713e+06	7.59438e+06	7.89149e+06	9.10606e+06	8.94612e+06	6.95259e+06	7.29907e+06	7.55985e+06	7.65466e+06	7.74377e+06	7.24233e+06
786	272.258	272.212	272.261	119.081	118.371	120.497	44	16	0	19	9	0	0	256607	275709	262935	1.0874e+06	959289	1.02681e+06	306887	392552	361728	310810	309768	322562	330078	284377	309871	499314	475215	429300	314772	381560	366619	567815	545735	882377	615856	948350	995641	253488	243106	291322	258843	255356	254514	300656	280961	241112
787	272.182	272.169	272.294	183.585	162.895	190.074	103	27	17	19	6	18	16	973033	932795	772238	1.16123e+06	1.19256e+06	1.22906e+06	1.01149e+06	835150	736739	1.42242e+06	1.47196e+06	1.57863e+06	826220	702466	774996	1.53103e+06	1.11791e+06	1.05912e+06	1.01335e+06	885345	938767	1.13959e+06	1.04486e+06	920625	730392	847125	799461	1.05872e+06	952247	1.02642e+06	1.50339e+06	1.1247e+06	857126	1.17747e+06	1.28967e+06	1.37446e+06
788	272.218	272.171	272.37	72.682	68.0759	78.4649	77	34	0	33	9	1	0	446435	976069	933582	1.55139e+06	1.4551e+06	1.53757e+06	1.00286e+06	1.15792e+06	1.01839e+06	1.19439e+06	1.09106e+06	1.17511e+06	2.91672e+06	2.63735e+06	2.65469e+06	1.83845e+06	1.64257e+06	1.64041e+06	2.95582e+06	2.86599e+06	2.82374e+06	1.26587e+06	1.35203e+06	1.14482e+06	727003	1.67612e+06	1.57934e+06	1.23981e+06	1.19345e+06	941366	2.25267e+06	2.07857e+06	2.1811e+06	373902	1.18656e+06	1.1541e+06
789	273.062	273.059	273.07	154.618	152.834	155.337	167	36	36	34	9	36	16	1.08161e+07	9.82095e+06	9.3635e+06	1.10224e+07	1.07619e+07	1.08165e+07	5.22843e+06	1.13313e+07	9.13103e+06	1.06364e+07	9.76645e+06	9.17926e+06	1.16064e+07	1.06261e+07	1.17042e+07	1.20945e+07	1.2835e+07	1.30112e+07	1.27442e+07	1.13792e+07	1.07365e+07	1.27785e+07	1.21203e+07	1.16709e+07	7.30449e+06	1.41309e+07	1.39828e+07	1.49336e+07	1.46423e+07	1.4606e+07	1.41591e+07	1.35016e+07	1.32727e+07	1.44244e+07	1.33696e+07	1.27177e+07
790	273.048	273.045	273.06	444.723	441.266	447.267	167	36	36	34	9	36	16	8.05269e+06	7.92532e+06	7.75147e+06	8.17809e+06	7.58719e+06	7.5875e+06	7.20195e+06	7.74986e+06	7.96011e+06	8.40635e+06	8.375e+06	8.42482e+06	8.31656e+06	7.6408e+06	7.64444e+06	8.65842e+06	7.60538e+06	7.64672e+06	7.42664e+06	7.22445e+06	6.83021e+06	7.58368e+06	7.32903e+06	7.32887e+06	7.70042e+06	7.2862e+06	7.3203e+06	7.70744e+06	7.49843e+06	7.58205e+06	7.69754e+06	7.2769e+06	7.02956e+06	7.44294e+06	7.21672e+06	7.09574e+06
791	273.098	273.078	273.105	521.727	521.145	522.335	158	31	36	31	9	35	16	4.61037e+06	4.4735e+06	4.4261e+06	4.59488e+06	4.71063e+06	4.64202e+06	3.88437e+06	4.32827e+06	3.65766e+06	4.71367e+06	4.27549e+06	4.27679e+06	6.29446e+06	4.08126e+06	4.07099e+06	6.5623e+06	4.22771e+06	4.16606e+06	4.63267e+06	4.3579e+06	4.08752e+06	4.3224e+06	3.8292e+06	4.08237e+06	3.36074e+06	3.91228e+06	3.85522e+06	4.54657e+06	4.15068e+06	4.2863e+06	4.64111e+06	3.73918e+06	4.18387e+06	4.71122e+06	4.03475e+06	4.29101e+06
792	273.093	273.086	273.1	207.198	206.179	207.973	103	24	31	8	0	27	13	1.85226e+07	1.6329e+07	1.4759e+07	1.1467e+07	1.13091e+07	1.30376e+07	2.04198e+06	2.68979e+06	1.96435e+06	8.84773e+06	8.51927e+06	8.35364e+06	3.66816e+06	3.25015e+06	3.37059e+06	3.1764e+06	3.05888e+06	2.73606e+06	4.37154e+06	3.91287e+06	3.75176e+06	2.79103e+06	2.54183e+06	2.21618e+06	1.92179e+06	2.57829e+06	2.25482e+06	5.446e+06	4.9904e+06	5.08567e+06	3.35258e+06	2.97392e+06	2.87361e+06	4.04763e+06	3.54081e+06	3.41421e+06
793	273.127	273.033	273.192	354.336	342.18	365.027	92	18	23	15	9	24	3	3.76104e+06	2.52745e+06	2.59898e+06	3.1547e+06	3.62331e+06	4.96986e+06	667369	2.87979e+06	2.53848e+06	3.20155e+06	2.08489e+06	1.77543e+06	6.60242e+06	3.38086e+06	3.35289e+06	6.38295e+06	2.28774e+06	2.06113e+06	5.63902e+06	4.83491e+06	4.53496e+06	4.91669e+06	4.86644e+06	4.87486e+06	3.02016e+06	3.65451e+06	6.9432e+06	5.06737e+06	4.41291e+06	4.32328e+06	3.87265e+06	2.8885e+06	2.75094e+06	3.9176e+06	2.82235e+06	2.98769e+06
794	273.161	273.112	273.19	76.3238	72.5559	78.151	63	26	0	28	9	0	0	2.59181e+06	2.3327e+06	2.23398e+06	3.05342e+06	3.03352e+06	3.77631e+06	490002	2.1006e+06	2.09223e+06	1.96645e+06	2.25219e+06	2.09271e+06	840246	2.01461e+06	1.87119e+06	4.93564e+06	6.13501e+06	5.8806e+06	6.64923e+06	5.9292e+06	5.88167e+06	4.40371e+06	4.13884e+06	4.03451e+06	4.51284e+06	6.74345e+06	6.71858e+06	1.9935e+06	2.31017e+06	2.10675e+06	4.16684e+06	3.80615e+06	3.75094e+06	2.80565e+06	2.36551e+06	2.2743e+06
795	274.105	273.984	274.108	385.306	382.693	386.892	162	33	36	34	9	35	15	5.95063e+06	6.20438e+06	6.27691e+06	5.90359e+06	7.10917e+06	8.30183e+06	496842	5.966e+06	6.39127e+06	5.66351e+06	6.25937e+06	6.72469e+06	284349	5.68816e+06	6.0195e+06	261693	6.28589e+06	6.74901e+06	6.71451e+06	7.16547e+06	7.41455e+06	5.94474e+06	6.56608e+06	6.92049e+06	5.0687e+06	5.83741e+06	6.25297e+06	7.10837e+06	7.6489e+06	8.68621e+06	5.32834e+06	6.48054e+06	6.94893e+06	6.10457e+06	7.05423e+06	7.2069e+06
796	274.11	274.104	274.125	442.746	433.845	451.963	146	31	33	28	9	30	15	4.41299e+06	4.49864e+06	4.96967e+06	4.66864e+06	5.0338e+06	5.59588e+06	6.1545e+06	4.37733e+06	4.08774e+06	4.76429e+06	4.49395e+06	5.3773e+06	7.50635e+06	4.19975e+06	4.58885e+06	7.78249e+06	4.81039e+06	4.98235e+06	4.75076e+06	4.94397e+06	5.40615e+06	4.5507e+06	4.77883e+06	5.19639e+06	3.11632e+06	4.44795e+06	4.76798e+06	4.88382e+06	5.2841e+06	5.61953e+06	4.38613e+06	4.51278e+06	4.75606e+06	4.58411e+06	4.87532e+06	5.07432e+06
797	274.177	274.17	274.191	282.668	280.177	285.23	87	13	18	16	8	20	12	1.80572e+06	1.57518e+06	1.56038e+06	1.84828e+06	2.00515e+06	2.12722e+06	747140	1.40948e+06	1.10761e+06	1.68321e+06	1.7284e+06	1.82238e+06	1.41239e+06	1.34698e+06	1.55726e+06	1.72308e+06	1.98077e+06	1.84579e+06	2.14071e+06	1.9803e+06	1.87542e+06	1.75192e+06	1.60315e+06	1.56273e+06	906313	1.46298e+06	1.42327e+06	2.18991e+06	2.24924e+06	2.26106e+06	1.7279e+06	1.63533e+06	1.63914e+06	1.8846e+06	1.85846e+06	1.78433e+06
798	274.059	274.055	274.269	151.948	141.993	154.468	75	30	2	33	9	1	0	2.75735e+06	2.50216e+06	2.45536e+06	2.52959e+06	2.64828e+06	2.88508e+06	891481	1.41009e+06	1.22413e+06	2.53414e+06	2.53189e+06	2.81066e+06	2.9224e+06	1.42407e+06	1.48428e+06	3.30923e+06	1.81997e+06	1.74443e+06	3.99766e+06	4.37425e+06	4.42702e+06	2.54372e+06	2.51347e+06	2.35475e+06	998408	1.87478e+06	1.71711e+06	2.97879e+06	2.95101e+06	2.99659e+06	2.86717e+06	2.58496e+06	2.64093e+06	3.34607e+06	3.00045e+06	2.98642e+06
799	274.268	274.252	274.274	82.4122	80.5185	84.0173	66	29	0	28	9	0	0	2.9438e+06	3.20415e+06	2.79711e+06	3.04408e+06	3.31867e+06	3.08597e+06	3.18029e+06	2.77e+06	2.29313e+06	2.98335e+06	3.23807e+06	2.89264e+06	5.27549e+06	2.82316e+06	3.19265e+06	5.70636e+06	3.14909e+06	3.55014e+06	3.36476e+06	3.39202e+06	3.23675e+06	3.14098e+06	3.21915e+06	2.96672e+06	2.52784e+06	3.5127e+06	3.22994e+06	3.13416e+06	2.85208e+06	3.02984e+06	3.63749e+06	3.06658e+06	2.57483e+06	3.68843e+06	3.03248e+06	2.84201e+06
800	274.975	274.974	274.975	654.793	652.162	658.915	165	35	36	34	9	36	15	4.9251e+06	5.15654e+06	4.70022e+06	4.94098e+06	5.13391e+06	4.87899e+06	7.35772e+06	3.90728e+06	3.93135e+06	5.06639e+06	5.35579e+06	4.97979e+06	7.7503e+06	4.54227e+06	5.01242e+06	7.43967e+06	4.74274e+06	4.63331e+06	5.49198e+06	5.69401e+06	5.40014e+06	5.27639e+06	5.48388e+06	5.34402e+06	4.68663e+06	5.34378e+06	5.27896e+06	5.78161e+06	6.32139e+06	5.94899e+06	5.83007e+06	5.50029e+06	5.60543e+06	6.21917e+06	5.84554e+06	5.99656e+06
801	275.094	275.048	275.095	193.302	183.793	197.915	159	33	36	30	8	36	16	6.38911e+06	5.29397e+06	5.37322e+06	6.23604e+06	5.45639e+06	5.75583e+06	7.10244e+06	6.19671e+06	5.80229e+06	6.48505e+06	5.60344e+06	4.78721e+06	6.77518e+06	6.26643e+06	5.56845e+06	6.57997e+06	6.43211e+06	5.74577e+06	6.16349e+06	5.39886e+06	4.90478e+06	6.25752e+06	5.72837e+06	5.09955e+06	6.8719e+06	6.30053e+06	5.82351e+06	6.31178e+06	5.89961e+06	5.34015e+06	6.85801e+06	5.88898e+06	5.11218e+06	7.05996e+06	6.00051e+06	5.2086e+06
802	275.05	275.043	275.07	112.66	105.72	129.779	141	35	25	32	9	27	13	8.47441e+06	7.98133e+06	7.64973e+06	7.38156e+06	7.39834e+06	8.34487e+06	3.65499e+06	2.45875e+06	2.14444e+06	5.71799e+06	5.87236e+06	6.58188e+06	3.7727e+06	2.74471e+06	4.05492e+06	5.77008e+06	5.01666e+06	4.96929e+06	3.19064e+06	3.9036e+06	3.46563e+06	3.23613e+06	3.67408e+06	3.62763e+06	1.67675e+06	4.12374e+06	3.91529e+06	4.0617e+06	4.05453e+06	4.09803e+06	2.539e+06	2.50214e+06	3.39865e+06	2.81143e+06	2.66274e+06	3.57798e+06
[truncated: 2,351 more rows]
[truncated: 133 more columns]

## Sheet: peakList_HILIC (-)
	mz	mzmin	mzmax	rt	rtmin	rtmax	npeaks	carbo	CP	ctrl	meio	pacli	QC	BB1_ov265_Carbo_d14_1_neg_01_1	BB1_ov265_Carbo_d14_1_neg_02	BB1_ov265_Carbo_d14_1_neg_03	CC1_ov265_carbo_d14_2_neg_01	CC1_ov265_carbo_d14_2_neg_02	CC1_ov265_carbo_d14_2_neg_03	D1_ov264_Carbo_d14_1_neg_01_1	D1_ov264_Carbo_d14_1_neg_02	D1_ov264_Carbo_d14_1_neg_03	DD1_ov265_carbo_d14_3_neg_01	DD1_ov265_carbo_d14_3_neg_02	DD1_ov265_carbo_d14_3_neg_03	E1_ov264_carbo_d14_2_neg_01_1	E1_ov264_carbo_d14_2_neg_02	E1_ov264_carbo_d14_2_neg_03	F1_ov264_carbo_d14_3_neg_01_1	F1_ov264_carbo_d14_3_neg_02	F1_ov264_carbo_d14_3_neg_03	NN1_ov265_Carbo_d21_1_neg_01	NN1_ov265_Carbo_d21_1_neg_02	NN1_ov265_Carbo_d21_1_neg_03	OO1_ov265_carbo_d21_2_neg_01	OO1_ov265_carbo_d21_2_neg_02	OO1_ov265_carbo_d21_2_neg_03	P1_ov264_Carbo_d21_1_neg_01_1	P1_ov264_Carbo_d21_1_neg_02	P1_ov264_Carbo_d21_1_neg_03	PP1_ov265_carbo_d21_3_neg_01	PP1_ov265_carbo_d21_3_neg_02	PP1_ov265_carbo_d21_3_neg_03	Q1_ov264_carbo_d21_2_neg_01_1	Q1_ov264_carbo_d21_2_neg_02	Q1_ov264_carbo_d21_2_neg_03	R1_ov264_carbo_d21_3_neg_01_1	R1_ov264_carbo_d21_3_neg_02	R1_ov264_carbo_d21_3_neg_03
[truncated: 2,036 more rows]
[truncated: 133 more columns]

[truncated: 3 more sheets: peakList_RPLC (+), peakList_RPLC (-), Feature annotation table]
