# Supplementary material for: Exploring Metabolic Signatures of Ex Vivo Tumor Tissue Cultures for Prediction of Chemosensitivity in Ovarian Cancer
Source: Cancers (Basel). 2022 Sep 14;14(18):4460. doi: 10.3390/cancers14184460 (PMC9496731; doi:10.3390/cancers14184460)
Supplement: Supplementary file 1 [file cancers-14-04460-s001.zip › Supplementary File S3.xlsx]

## Sheet: No annotations
					DP	1.23008	1.99004	1.17908	1.87943	1.29476	10.6883	1.2145	3.23518	0.607768	1.32749	2.55435	2.25734	2.06665	1.2894	14.5936	2.0218	1.68343	0.651634	2.63207	1.96699	1.6152	2.60651	6.31235	15.4181	1.23396	0.881381	0.959696	2.09097	3.73058	0.787082	2.15125	2.54712	2.05772	36.2643	1.04978	1.85969	5.55767	1.22066	0.875963	1.44426	0.638506	1.78052	0.89371	1.08478
					Relative precision (%)	10.0083	3.42405	4.07636	5.01144	8.72277	3.77105	11.3797	4.65587	4.94492	5.51376	3.62471	3.88017	4.27217	9.21756	1.86438	3.59706	5.43552	14.1318	4.21797	4.14303	6.72954	6.48552	15.1255	8.45834	4.59516	6.75971	6.8648	5.01425	19.0125	15.4688	5.55245	3.26966	3.33477	8.59393	18.1673	4.4349	4.38904	7.98757	5.65269	5.34393	18.0423	9.54203	6.21234	6.27856
					LOD	191551	57792.2	30767.3	130387	350574	71421.2	193566	2.84574e+06	26003	26620.3	744396	788220	101698	25241.4	1.25272e+07	11300	33735.1	178824	48909	49065.3	88549.6	38740	19836.5	418556	64038.1	47027.5	10624.8	14514.1	209545	29380.9	489653	135621	25820.7	9373.25	80468.1	35537.6	14740.2	124164	29962.7	50097.7	28413.8	124678	18475.9	58985.7
					RT [min]	1.093	1.094	1.126	3.749	6.993	6.597	1.097	2.602	1.626	1.142	4.094	3.755	5.521	5.746	1.22	1.091	5.524	1.087	6.406	4.369	5.526	1.435	1.156	4.358	1.01	1.566	1.548	1.095	2.143	1.095	1.016	5.523	1.079	1.97	1.848	4.371	1.334	1.007	1.011	1.01	1.169	1.264	1.01	1.574
					Molecular Weight	57.9586	59.9557	67.9874	68.0627	68.0627	75.032	79.9406	83.0371	84.0436	84.9776	85.0892	85.0892	89.0153	89.0477	90.0317	95.9145	102.047	103.964	104.026	105.01	106.042	107.982	111.03	111.043	111.95	113.995	115.027	115.917	116.016	116.942	118.012	119.074	120.001	120.021	121.064	122.037	123.08	124.946	127.927	127.944	128.941	129.09	129.925	130.027
					Formula				C5 H8	C5 H8	C2 H5 N O2		C4 H5 N O	C2 H4 N4		C5 H11 N	C5 H11 N		C3 H7 N O2	C3 H6 O3		C8 H6		C7 H4 O		C7 H6 O		C H N7	C4 H5 N3 O		C4 H2 O4	C4 H5 N O3		C2 H4 N4 S			C8 H9 N		C7 H4 O2	C5 H12 Cl N	C7 H6 O2	C6 H9 N3					C5 H11 N3 O		C5 H6 O4
					Annotation level
					Name	[Similar to: 2,4-Diaminoanisole; ΔMass: -80.1207 Da]		[Similar to: NP-021303; ΔMass: -400.1699 Da]							[Similar to: 4-[(1S,3aR,4S,6aR)-4-(3,4-Dimethoxyphenyl)tetrahydro-1H,3H-furo[3,4-c]furan-1-yl]-2-methoxyphenol; ΔMass: -287.1797 Da]			[Similar to: {3-[(E)-2-(1,3-Benzodioxol-5-yl)vinyl]-2-oxiranyl}(1-piperidinyl)methanone; ΔMass: -212.1161 Da]				[Similar to: 6-O-[(2E)-3-(4-Hydroxyphenyl)-2-propenoyl]-1-O-[(2E)-3-phenyl-2-propenoyl]-β-D-glucopyranose; ΔMass: -354.0951 Da]		[Similar to: Methyl N-{[(2S)-1,4-bis(3-fluorobenzoyl)-2-piperazinyl]carbonyl}-D-alaninate; ΔMass: -355.1344 Da]	[Similar to: (1R,9R)-N-(4-Fluorophenyl)-5-[(3-methoxypropanoyl)amino]-6-oxo-7,11-diazatricyclo[7.3.1.02,7]trideca-2,4-diene-11-carboxamide; ΔMass: -323.1757 Da]			[Similar to: Cytidine; ΔMass: -132.0559 Da]					[Similar to: 6-[4-(3,4-dimethoxyphenyl)-hexahydrofuro[3,4-c]furan-1-yl]-4-methoxy-2H-1,3-benzodioxole; ΔMass: -284.2349 Da]	[Similar to: Betaine; ΔMass: -1.0633 Da]	[Similar to: N-(2-hydroxyethyl)-N'-propylthiourea; ΔMass: -45.1411 Da]	[Similar to: 1,10-Diamino-4,7-dioxadecane; ΔMass: -58.1408 Da]	[Similar to: Nα-{[(1S,3R,4R,5S)-1,3,4-trihydroxy-5-{[(phenylsulfonyl)acetyl]amino}cyclohexyl]carbonyl}-D-phenylalaninamide; ΔMass: -400.0940 Da]					[Similar to: 1H-indol-3-yl(pyridin-2-yl)methanol; ΔMass: -101.0153 Da]		[Similar to: Bicine; ΔMass: -35.1574 Da]	[Similar to: DL-Glutamine; ΔMass: -18.1255 Da]	[Similar to: 3-acetyl-2-undecyl-1,3-thiazolane-4-carboxylic acid; ΔMass: -200.2612 Da]	[Similar to: 3-acetyl-2-undecyl-1,3-thiazolane-4-carboxylic acid; ΔMass: -200.1123 Da]	[Similar to: Diglycidyl ether; ΔMass: -0.1377 Da]
					Compound #	X00396	X00927	X00827	X01599	X03051	X02458	X00436	X00518	X00765	X00807	X00184	X00169	X00812	X00489	X00240	X01534	X01620	X00727	X03008	X00791	X02055	X00931	X02782	X01201	X00456	X00464	X03498	X00992	X01878	X02730	X02753	X00068	X02846	X02681	X00078	X01115	X02299	X00294	X00213	X01060	X00422	X00985	X02132	X00902
MS-Omics ID	Customer ID	Treatment	original legend	OvC case	Unit	Area	Area	Area
_QC00						6.7698e+07	2.11101e+07	3.00345e+07	2.39311e+06	1.87183e+06	2.37392e+06	5.85341e+07	4.41778e+07	3.03623e+07	2.42661e+07	7.38965e+07	9.2248e+07	3.25587e+06	289805	1.55727e+08	7.73761e+06	919514	2.88906e+07	2.05515e+06	4.80412e+06	738574	1.70783e+07	120870	1.79782e+06	4.73915e+07	471381	113769	1.53263e+07	914357	2.06141e+06	2.15298e+06	1.15412e+08	111520	141301	6.58718e+06	2.73611e+06	3.18301e+06	1.08061e+08	2.04197e+08	1.51481e+07	2.69672e+07	982926	4.11089e+06	377616
_QC01						6.39752e+07	2.02398e+07	2.7926e+07	2.18698e+06	1.48576e+06	2.2392e+06	5.52268e+07	4.1561e+07	2.93138e+07	2.25434e+07	6.80475e+07	8.64892e+07	2.98493e+06	199298	1.54572e+08	7.41764e+06	852737	2.54031e+07	1.97706e+06	4.50217e+06	647610	1.43931e+07	130115	1.51091e+06	4.96375e+07	542388	124392	1.39048e+07	822139	1.94932e+06	1.99769e+06	1.06763e+08	112805	150741	3.69452e+06	2.55743e+06	3.07161e+06	1.15197e+08	2.17894e+08	1.71985e+07	2.14269e+07	893855	4.33387e+06	451656
_QC02						7.20116e+07	2.28146e+07	3.1346e+07	2.46838e+06	2.12243e+06	2.61132e+06	6.20119e+07	4.56454e+07	3.25037e+07	2.70878e+07	7.53035e+07	9.59054e+07	3.40357e+06	237956	1.54044e+08	8.35776e+06	967704	2.38873e+07	2.20243e+06	5.16291e+06	765771	1.39881e+07	184131	1.95174e+06	4.09459e+07	475734	109094	1.76376e+07	861835	2.3658e+06	2.59476e+06	1.22567e+08	113803	164283	4.36453e+06	2.94182e+06	3.39155e+06	9.98419e+07	1.955e+08	1.37574e+07	3.32932e+07	1.08821e+06	3.73523e+06	411568
_QC03						7.19738e+07	2.29216e+07	2.98316e+07	2.50525e+06	1.7259e+06	2.40064e+06	6.19881e+07	4.16563e+07	3.18791e+07	2.62327e+07	7.15756e+07	9.50778e+07	3.3496e+06	213196	1.55281e+08	8.43158e+06	947408	2.6838e+07	2.36693e+06	5.23909e+06	784669	1.43687e+07	240336	1.63831e+06	4.49662e+07	487712	111754	1.64263e+07	822341	2.59841e+06	2.2674e+06	1.19156e+08	111547	160745	4.29651e+06	2.97643e+06	3.27518e+06	1.13903e+08	2.31988e+08	1.53374e+07	2.80356e+07	1.06169e+06	4.3382e+06	436252
_QC04						7.26071e+07	2.30042e+07	3.26802e+07	2.56559e+06	2.11428e+06	2.49179e+06	6.2626e+07	4.98465e+07	3.36724e+07	2.76308e+07	7.7601e+07	9.87414e+07	3.57891e+06	221157	1.48418e+08	8.4392e+06	982145	2.53011e+07	2.19964e+06	5.5161e+06	904693	1.60251e+07	210621	1.88679e+06	4.36926e+07	514811	118982	1.69965e+07	902819	2.99395e+06	2.47253e+06	1.24058e+08	116642	171787	4.25909e+06	3.12182e+06	3.55849e+06	1.15555e+08	2.15952e+08	1.71538e+07	3.05123e+07	1.08513e+06	4.55173e+06	420468
_QC05						7.111e+07	2.22868e+07	3.03189e+07	2.48363e+06	1.96651e+06	2.38299e+06	6.14713e+07	4.29221e+07	3.29565e+07	2.53113e+07	7.14551e+07	9.41659e+07	3.35496e+06	238088	1.55378e+08	8.13825e+06	941293	2.53064e+07	2.28038e+06	5.26371e+06	932399	1.52696e+07	196736	2.08692e+06	4.53539e+07	551690	130168	1.60247e+07	847309	2.89065e+06	2.45713e+06	1.20374e+08	117755	158197	3.94813e+06	3.05634e+06	3.20602e+06	1.27046e+08	2.36756e+08	1.76148e+07	2.66872e+07	1.01568e+06	4.77744e+06	469587
_QC06						7.21671e+07	2.33732e+07	3.21011e+07	2.52142e+06	1.70451e+06	2.49574e+06	6.18929e+07	4.66982e+07	3.80055e+07	2.766e+07	7.22529e+07	1.0214e+08	3.69696e+06	222348	1.57807e+08	8.56014e+06	973790	2.59445e+07	2.18148e+06	5.61614e+06	912548	1.47705e+07	177697	1.88892e+06	4.24102e+07	470296	108684	1.72823e+07	901621	2.98435e+06	2.42082e+06	1.2577e+08	117820	160072	4.1112e+06	3.202e+06	3.13823e+06	1.17991e+08	2.28094e+08	1.66842e+07	3.40719e+07	1.04694e+06	4.10291e+06	379757
_QC07						6.9701e+07	2.25056e+07	3.13027e+07	2.3891e+06	1.84422e+06	2.29274e+06	5.98218e+07	4.5653e+07	3.30344e+07	2.51244e+07	7.10847e+07	9.06078e+07	3.37879e+06	242268	1.51509e+08	8.2802e+06	969842	3.75973e+07	2.08538e+06	5.18369e+06	795775	1.53271e+07	236776	1.91892e+06	4.83764e+07	599791	137021	1.55969e+07	872831	2.94728e+06	2.30337e+06	1.20099e+08	117660	138137	3.91513e+06	2.83539e+06	3.11795e+06	1.30517e+08	2.45882e+08	1.70082e+07	2.60935e+07	947316	4.64666e+06	465585
_QC08						7.41857e+07	2.46742e+07	3.25382e+07	2.56483e+06	1.97722e+06	2.49386e+06	6.36101e+07	4.64005e+07	3.4836e+07	2.90043e+07	7.84795e+07	9.68351e+07	3.55876e+06	206201	1.55004e+08	8.87349e+06	1.01675e+06	4.27861e+07	2.33962e+06	5.59486e+06	806755	1.60387e+07	156794	2.0645e+06	4.38987e+07	496345	113611	1.78977e+07	869820	3.06421e+06	2.61068e+06	1.25633e+08	123436	168622	3.94986e+06	3.09958e+06	3.27818e+06	1.21219e+08	2.25322e+08	1.55368e+07	3.56674e+07	1.0979e+06	4.1218e+06	422129
_QC09						6.98127e+07	2.2288e+07	3.10433e+07	2.3581e+06	1.95416e+06	2.42355e+06	5.99463e+07	4.46368e+07	3.47972e+07	2.63309e+07	7.09255e+07	9.23832e+07	3.45021e+06	239775	1.52986e+08	8.38007e+06	909090	2.50503e+07	2.07054e+06	5.2555e+06	848785	1.40858e+07	191355	2.03504e+06	4.79415e+07	531371	121210	1.59472e+07	1.02715e+06	3.03287e+06	2.41175e+06	1.21839e+08	122010	137797	3.89941e+06	2.92443e+06	3.31019e+06	1.23183e+08	2.46534e+08	1.6675e+07	2.89058e+07	1.03582e+06	4.09949e+06	458985
_QC10						7.24901e+07	2.35106e+07	3.2121e+07	2.47496e+06	2.13344e+06	2.51595e+06	6.19584e+07	4.56102e+07	3.69522e+07	2.7654e+07	7.78264e+07	1.02374e+08	3.53894e+06	224868	1.53852e+08	8.77469e+06	1.05393e+06	2.72376e+07	2.19578e+06	5.28156e+06	751241	1.57483e+07	188711	1.68789e+06	4.48266e+07	481156	109674	1.75031e+07	1.13525e+06	3.02666e+06	2.35599e+06	1.26173e+08	117048	157562	4.16748e+06	3.01826e+06	3.40291e+06	1.17406e+08	2.17478e+08	1.62417e+07	3.22628e+07	1.04539e+06	4.38917e+06	423132
_QC11						9.25255e+07	2.35567e+07	3.38133e+07	2.55776e+06	2.16211e+06	2.58104e+06	8.22138e+07	4.67205e+07	3.39898e+07	2.7923e+07	7.39265e+07	9.97288e+07	3.50105e+06	218556	1.50587e+08	8.65098e+06	979428	2.5773e+07	2.19283e+06	5.42288e+06	788731	1.45991e+07	165447	1.99206e+06	4.43831e+07	541874	127601	1.72448e+07	1.11388e+06	3.14883e+06	2.32659e+06	1.26095e+08	123807	159613	4.08811e+06	3.09332e+06	3.61401e+06	1.17315e+08	2.27542e+08	1.54458e+07	3.11485e+07	1.06348e+06	3.8608e+06	465760
_QC12						9.08505e+07	2.32123e+07	3.19589e+07	2.40208e+06	1.85794e+06	2.35784e+06	8.07298e+07	4.33272e+07	3.32228e+07	2.54822e+07	7.35645e+07	9.94784e+07	3.46344e+06	233510	1.56078e+08	8.4869e+06	1.04823e+06	2.53925e+07	2.35579e+06	5.14056e+06	776795	1.41925e+07	155284	1.75791e+06	4.77069e+07	503226	116069	1.67498e+07	952711	2.62842e+06	2.39357e+06	1.25014e+08	117660	137237	4.00657e+06	2.94038e+06	3.46028e+06	1.14332e+08	2.21061e+08	1.48937e+07	2.78763e+07	1.02872e+06	4.34002e+06	457401
_QC13						6.83224e+07	2.27465e+07	3.11978e+07	2.52544e+06	1.97201e+06	2.434e+06	5.84315e+07	5.04343e+07	3.30554e+07	2.6831e+07	7.48805e+07	1.00708e+08	3.53456e+06	211496	1.56863e+08	8.3683e+06	956358	2.50221e+07	2.2311e+06	5.1244e+06	794413	1.57411e+07	178264	1.77499e+06	4.72978e+07	518108	117838	1.64805e+07	702461	2.95744e+06	2.4361e+06	1.23846e+08	119811	148386	3.97203e+06	2.91273e+06	3.18058e+06	1.17233e+08	2.37717e+08	1.53019e+07	2.87871e+07	992292	4.66763e+06	443391
_QC14						6.55266e+07	2.16954e+07	2.88475e+07	2.66708e+06	1.68247e+06	2.4497e+06	5.60721e+07	4.72217e+07	3.41077e+07	2.34838e+07	7.2803e+07	9.43937e+07	3.57294e+06	221995	1.57949e+08	8.06587e+06	1.07322e+06	2.54591e+07	2.23212e+06	5.36841e+06	803359	1.39005e+07	241985	1.37854e+06	4.82503e+07	474519	110908	1.53775e+07	1.38784e+06	2.6451e+06	2.21382e+06	1.25065e+08	115317	186441	4.13422e+06	3.03215e+06	3.2127e+06	1.19473e+08	2.38337e+08	1.6536e+07	2.71941e+07	982436	4.33454e+06	390768
_QC15						6.88933e+07	2.27552e+07	3.04069e+07	2.39673e+06	1.84833e+06	2.48148e+06	5.87481e+07	4.36663e+07	3.26044e+07	2.54516e+07	7.17272e+07	9.62551e+07	3.29973e+06	239902	1.54594e+08	8.49647e+06	962120	2.51345e+07	2.24154e+06	5.2282e+06	798938	1.56296e+07	177528	1.86992e+06	4.58685e+07	546735	128667	1.65452e+07	786702	2.12573e+06	2.45669e+06	1.17359e+08	116440	146278	4.3512e+06	2.97357e+06	3.17937e+06	1.11261e+08	2.12165e+08	1.66527e+07	2.97124e+07	984327	4.33793e+06	428923
_QC16						6.66502e+07	2.17639e+07	2.88319e+07	2.29296e+06	1.82996e+06	2.28652e+06	5.69864e+07	4.29126e+07	3.12724e+07	2.41216e+07	6.80386e+07	8.841e+07	3.32584e+06	227790	1.52109e+08	8.11692e+06	879342	3.69537e+07	2.13975e+06	5.04685e+06	790423	1.47915e+07	162799	1.78559e+06	4.76118e+07	494082	113630	1.55938e+07	844977	2.75643e+06	2.222e+06	1.16475e+08	114071	133980	4.03322e+06	2.85437e+06	3.22513e+06	1.13428e+08	2.24912e+08	1.67044e+07	2.66668e+07	972186	4.44217e+06	392366
_QC17						6.76898e+07	2.23523e+07	3.15898e+07	2.48786e+06	1.83149e+06	2.53672e+06	5.80598e+07	4.59867e+07	3.26476e+07	2.72626e+07	7.66286e+07	9.44216e+07	3.44248e+06	211638	1.53233e+08	8.21257e+06	979894	2.71901e+07	2.10943e+06	5.31098e+06	856121	1.50622e+07	168476	1.81149e+06	4.26116e+07	506970	118669	1.66239e+07	729718	3.0277e+06	2.50447e+06	1.19885e+08	120984	173464	4.33644e+06	2.98969e+06	3.28528e+06	1.09933e+08	2.29698e+08	1.51523e+07	3.21208e+07	965284	4.06086e+06	438848
_QC18						8.4154e+07	2.22996e+07	3.08962e+07	2.51604e+06	1.9426e+06	2.46273e+06	7.46659e+07	4.44166e+07	3.26433e+07	2.65143e+07	7.29739e+07	9.25134e+07	3.5402e+06	251054	1.55699e+08	7.83769e+06	882622	2.673e+07	2.1677e+06	5.18317e+06	800850	1.55521e+07	166488	1.8164e+06	4.36238e+07	506000	119647	1.60977e+07	762784	2.8652e+06	2.38092e+06	1.17744e+08	108410	149869	4.1938e+06	2.91375e+06	3.54173e+06	1.13332e+08	2.01424e+08	1.49266e+07	2.96015e+07	1.28669e+06	4.25124e+06	402142
_QC19						6.47417e+07	2.20099e+07	3.0813e+07	2.34374e+06	1.66551e+06	2.34665e+06	5.51404e+07	4.51427e+07	3.23087e+07	2.49669e+07	7.42619e+07	9.48288e+07	3.23045e+06	212284	1.52396e+08	8.10844e+06	954619	2.536e+07	2.09972e+06	5.21283e+06	727141	1.43106e+07	174930	1.73413e+06	4.55759e+07	486462	110211	1.62331e+07	952130	2.83488e+06	2.38096e+06	1.17259e+08	117236	166286	4.1852e+06	3.04162e+06	3.13251e+06	1.19131e+08	2.22766e+08	1.6437e+07	2.73938e+07	972253	4.29247e+06	432515
_QC20						6.51555e+07	2.22856e+07	3.06921e+07	2.39539e+06	2.02029e+06	2.38728e+06	5.55048e+07	4.2398e+07	3.19923e+07	2.63445e+07	7.21238e+07	9.40002e+07	3.13999e+06	262755	1.53889e+08	8.18457e+06	898288	2.63429e+07	2.17394e+06	4.79465e+06	798689	1.6245e+07	195255	2.10227e+06	4.47302e+07	523587	121096	1.60568e+07	953596	1.59307e+06	2.14972e+06	1.17152e+08	111038	151986	6.0242e+06	2.68986e+06	3.12216e+06	1.14188e+08	2.11825e+08	1.67573e+07	2.75343e+07	942102	4.12268e+06	440884
_QC21						7.39329e+07	2.3284e+07	3.11567e+07	2.40845e+06	1.77673e+06	2.43129e+06	6.36848e+07	4.36065e+07	3.28809e+07	2.67862e+07	7.88862e+07	9.50115e+07	3.50051e+06	262122	1.52657e+08	8.5609e+06	936766	3.01789e+07	2.30726e+06	5.20884e+06	786736	1.37052e+07	208412	2.07668e+06	4.60225e+07	478749	109685	1.74425e+07	1.08409e+06	2.35311e+06	2.58383e+06	1.21033e+08	114563	148835	6.15437e+06	2.94818e+06	3.40449e+06	1.10128e+08	2.28329e+08	1.63463e+07	3.4404e+07	1.29488e+06	4.3179e+06	423309
_QC22						6.86998e+07	2.16124e+07	3.00814e+07	2.37402e+06	1.8558e+06	2.24949e+06	5.94246e+07	4.30803e+07	3.13518e+07	2.32702e+07	6.89883e+07	9.05721e+07	3.24055e+06	208859	1.46991e+08	7.7605e+06	907854	2.68805e+07	2.17487e+06	5.08086e+06	763458	1.34972e+07	155177	1.76047e+06	4.61328e+07	456585	108067	1.50811e+07	871036	2.05957e+06	2.33548e+06	1.15958e+08	114970	136785	3.95653e+06	2.86474e+06	3.19052e+06	1.17012e+08	1.91964e+08	1.65613e+07	2.71604e+07	855012	4.64433e+06	365021
_QC23						7.36824e+07	2.29602e+07	3.30868e+07	2.56925e+06	2.10813e+06	2.58029e+06	6.36274e+07	4.70341e+07	3.39733e+07	2.761e+07	7.45095e+07	9.93924e+07	3.43249e+06	249929	1.55843e+08	8.40471e+06	910195	2.69722e+07	2.17624e+06	5.16151e+06	813994	1.56913e+07	158077	1.79574e+06	4.60584e+07	539131	123529	1.66298e+07	767322	2.44164e+06	2.26589e+06	1.21345e+08	115354	152506	4.21941e+06	2.91936e+06	3.21476e+06	1.09387e+08	2.30682e+08	1.60121e+07	3.27984e+07	942176	3.64473e+06	454365
_QC24						7.16673e+07	2.25358e+07	3.0917e+07	2.35335e+06	1.63001e+06	2.367e+06	6.16675e+07	4.61983e+07	3.53431e+07	2.56872e+07	7.00649e+07	9.40222e+07	3.33053e+06	249589	1.60924e+08	8.37518e+06	1.04983e+06	2.76452e+07	2.09415e+06	5.2129e+06	788097	1.43286e+07	195288	1.80386e+06	4.43235e+07	494041	116039	1.63703e+07	1.0324e+06	2.831e+06	2.19764e+06	1.20688e+08	116148	156730	3.92321e+06	2.98628e+06	3.10309e+06	1.12743e+08	2.32579e+08	1.55398e+07	2.93396e+07	1.12204e+06	4.31455e+06	433102
_QC25						7.1921e+07	2.24228e+07	3.03358e+07	2.44558e+06	1.85667e+06	2.59269e+06	6.19868e+07	4.5269e+07	3.23373e+07	2.58149e+07	7.28828e+07	9.91788e+07	3.54953e+06	206241	1.53687e+08	8.36374e+06	964908	2.82284e+07	2.23065e+06	5.2488e+06	819106	1.62698e+07	175472	1.77117e+06	4.85565e+07	555434	136038	1.60457e+07	736370	3.0303e+06	2.45986e+06	1.24361e+08	117274	160327	4.24143e+06	2.93692e+06	3.35139e+06	1.16272e+08	2.33633e+08	1.53922e+07	2.63458e+07	930904	4.30895e+06	445649
_QC26						7.18203e+07	2.26107e+07	3.08984e+07	2.67698e+06	2.04933e+06	2.40179e+06	6.20107e+07	4.40034e+07	3.34446e+07	2.57976e+07	7.48713e+07	9.64481e+07	3.40451e+06	201753	1.56732e+08	8.35638e+06	985120	2.7315e+07	2.15639e+06	5.34338e+06	863175	1.57513e+07	215469	1.90233e+06	4.37395e+07	492214	112877	1.70133e+07	704434	3.20644e+06	2.31947e+06	1.22052e+08	118907	159144	4.12978e+06	3.06542e+06	3.33975e+06	1.17949e+08	2.25509e+08	1.63319e+07	3.29012e+07	972597	4.72852e+06	433959
_QC27						6.88341e+07	2.22532e+07	3.01838e+07	2.48559e+06	2.0867e+06	2.43136e+06	5.93957e+07	4.77865e+07	3.35857e+07	2.7491e+07	7.36547e+07	9.45648e+07	3.29718e+06	216821	1.52524e+08	8.03572e+06	956524	2.77068e+07	2.07443e+06	5.16271e+06	751521	1.61409e+07	190993	1.7209e+06	4.46049e+07	580392	120272	1.59273e+07	1.4426e+06	3.03646e+06	2.3187e+06	1.20552e+08	112779	188273	3.71547e+06	2.90521e+06	3.25477e+06	1.23608e+08	2.3252e+08	1.54241e+07	3.0931e+07	1.14954e+06	4.00388e+06	441918
_QC28						6.9651e+07	2.26186e+07	2.99394e+07	2.49356e+06	2.02145e+06	2.40827e+06	5.99684e+07	4.45031e+07	3.23338e+07	2.67909e+07	7.2693e+07	9.27839e+07	3.4977e+06	208329	1.53685e+08	8.29564e+06	1.0359e+06	2.64318e+07	2.26331e+06	5.10113e+06	845073	1.61756e+07	159926	1.75723e+06	4.31201e+07	496766	114358	1.61422e+07	858809	3.09622e+06	2.32886e+06	1.20512e+08	122767	162457	3.86355e+06	2.86379e+06	3.58541e+06	1.23501e+08	2.15009e+08	1.68471e+07	4.84842e+06	943004	4.21344e+06	453540
_QC29						6.99227e+07	2.21449e+07	3.06207e+07	2.0846e+06	1.63577e+06	2.41975e+06	6.01648e+07	4.54735e+07	3.24582e+07	2.60376e+07	7.23368e+07	9.33859e+07	3.59754e+06	249638	1.57417e+08	8.42253e+06	943971	2.84118e+07	2.18964e+06	5.34888e+06	818770	1.68952e+07	167788	1.74029e+06	4.41071e+07	540303	130081	1.61985e+07	731091	2.75045e+06	2.32806e+06	1.19888e+08	123850	162211	3.59071e+06	3.07993e+06	3.2855e+06	1.26331e+08	2.25781e+08	1.56898e+07	3.20456e+07	953159	4.44128e+06	446434
_QC30						9.18838e+07	2.29814e+07	3.22381e+07	2.60498e+06	1.93093e+06	2.40545e+06	8.20598e+07	4.34258e+07	3.39419e+07	2.68632e+07	7.37769e+07	9.97846e+07	3.40465e+06	208482	1.57053e+08	8.46996e+06	966349	2.77291e+07	2.15355e+06	5.36328e+06	814709	1.50931e+07	200630	1.81895e+06	4.88433e+07	539931	123951	1.67479e+07	741376	2.89248e+06	2.38098e+06	1.23127e+08	116157	159961	3.90155e+06	3.06909e+06	3.23334e+06	1.32449e+08	2.2457e+08	1.62212e+07	3.30024e+07	897833	4.22108e+06	449417
_QC31						6.79376e+07	2.22792e+07	3.10181e+07	2.41006e+06	1.92548e+06	2.47574e+06	5.73968e+07	4.75766e+07	3.25297e+07	2.58929e+07	7.24437e+07	9.30074e+07	3.32481e+06	243119	1.4878e+08	8.00563e+06	913612	2.62951e+07	2.20684e+06	5.25653e+06	768651	1.53099e+07	186310	1.92695e+06	4.48375e+07	511372	120591	1.69976e+07	1.07234e+06	2.84931e+06	2.44439e+06	1.18748e+08	117109	145673	3.84329e+06	2.94451e+06	3.13138e+06	1.34615e+08	2.24018e+08	1.64469e+07	3.16546e+07	1.05141e+06	4.42055e+06	399151
_QC32						6.86058e+07	2.28902e+07	2.95782e+07	2.57443e+06	1.80876e+06	2.40296e+06	5.89719e+07	4.53311e+07	3.37342e+07	2.49098e+07	7.27435e+07	9.45025e+07	3.29457e+06	224903	1.55316e+08	8.25833e+06	956876	2.73457e+07	2.0664e+06	5.18073e+06	794099	1.36565e+07	167109	1.87033e+06	4.47208e+07	499459	117063	1.55564e+07	944541	2.56481e+06	2.3566e+06	1.18778e+08	111699	148309	3.87376e+06	2.98667e+06	3.25841e+06	9.50158e+07	2.22152e+08	1.70097e+07	3.0871e+07	1.09618e+06	4.45496e+06	418022
_QC33						6.77436e+07	2.24843e+07	3.25232e+07	2.39967e+06	1.89849e+06	2.43382e+06	5.80453e+07	4.3015e+07	3.30823e+07	2.58169e+07	7.51076e+07	9.65451e+07	3.45274e+06	257763	1.52849e+08	8.36111e+06	945235	3.015e+07	2.31985e+06	4.97019e+06	787645	1.37563e+07	184522	1.88355e+06	4.7429e+07	454078	104293	1.65306e+07	900125	1.86724e+06	2.33179e+06	1.21509e+08	113188	138111	6.61644e+06	2.75982e+06	3.29146e+06	9.11177e+07	2.1866e+08	1.4899e+07	3.26204e+07	1.09521e+06	3.94931e+06	413476
CS25034	264 B1 d14	untreated d14	264	OvC8		6.81036e+07	2.19941e+07	3.05678e+07	2.49666e+06	2.20668e+06	3.14356e+06	5.83578e+07	3.78142e+07	3.28032e+07	2.514e+07	7.39181e+07	9.35537e+07	3.41263e+06	222740	1.54378e+08	8.25866e+06	928554	2.54911e+07	1.80658e+06	5.10743e+06	832851	1.37587e+07	181158	7.33117e+06	4.37958e+07	520408	120958	1.61418e+07	566847	2.84468e+06	2.47219e+06	1.21493e+08	115001	218882	4.54423e+06	2.86789e+06	1.5974e+06	1.13206e+08	2.18551e+08	1.54171e+07	2.78693e+07	1.04977e+06	4.10056e+06	459354
CS25035	264 B2 d14	untreated d14	264	OvC8		8.82644e+07	2.26428e+07	3.17831e+07	2.19998e+06	1.97849e+06	3.12275e+06	7.87544e+07	3.60563e+07	3.41968e+07	2.44113e+07	6.6911e+07	8.87645e+07	3.27166e+06	196777	1.41118e+08	8.0382e+06	928203	2.57419e+07	1.71712e+06	4.97686e+06	866086	1.26543e+07	151349	5.76006e+06	4.84995e+07	530066	121327	1.5533e+07	540075	2.55327e+06	2.34865e+06	1.16645e+08	112689	318694	4.48501e+06	2.87799e+06	1.47785e+06	1.14995e+08	2.32565e+08	1.55002e+07	3.12215e+07	1.05564e+06	4.51087e+06	451726
CS25036	264 B1 d21	untreated d21	264	OvC8		7.37385e+07	2.40887e+07	3.22394e+07	2.41165e+06	2.38368e+06	1.7541e+06	6.32044e+07	4.16283e+07	3.43951e+07	2.84786e+07	7.50704e+07	9.48858e+07	3.45801e+06	199185	1.52509e+08	8.76501e+06	1.04537e+06	2.50292e+07	2.32571e+06	5.35533e+06	873138	1.43742e+07	153692	2.59307e+06	4.4882e+07	501600	118009	1.7689e+07	316096	2.85272e+06	2.46825e+06	1.29897e+08	118543	229858	4.84913e+06	2.99118e+06	2.44426e+06	1.21169e+08	2.33418e+08	1.6883e+07	3.36069e+07	1.36061e+06	3.99315e+06	447116
CS25037	264 B2 d21	untreated d21	264	OvC8		6.9287e+07	2.24921e+07	3.1398e+07	2.20171e+06	1.85444e+06	1.6763e+06	5.96099e+07	3.82956e+07	3.30438e+07	2.71575e+07	6.88398e+07	9.34034e+07	3.3719e+06	169493	1.30383e+08	8.11664e+06	939662	2.51849e+07	2.13096e+06	5.29143e+06	813227	1.33469e+07	169917	2.9474e+06	4.56376e+07	476982	109974	1.60991e+07	396468	2.80979e+06	2.28235e+06	1.20114e+08	113525	329917	4.98325e+06	2.97678e+06	2.25132e+06	7.96578e+07	2.16588e+08	1.61449e+07	3.61127e+07	1.08694e+06	4.15145e+06	430622
CS25038	264 C1 d14	carboplatin d14	264	OvC8		8.64766e+07	2.20376e+07	3.23322e+07	2.32703e+06	1.92486e+06	3.2273e+06	7.66334e+07	3.96211e+07	3.41433e+07	2.62165e+07	7.01841e+07	9.13287e+07	3.16915e+06	221041	1.63611e+08	8.23677e+06	969858	2.58323e+07	1.76009e+06	5.19692e+06	798743	1.45836e+07	174335	917162	4.47824e+07	515066	119599	1.66648e+07	1.13217e+06	2.80109e+06	2.2703e+06	1.16535e+08	113981	54149.7	4.20474e+06	2.9175e+06	1.75789e+06	1.13411e+08	2.23379e+08	1.41817e+07	3.13221e+07	1.14129e+06	4.10391e+06	459406
CS25039	264 C2 d14	carboplatin d14	264	OvC8		6.64154e+07	2.18983e+07	3.14792e+07	2.51477e+06	1.94021e+06	3.04105e+06	5.73228e+07	3.75609e+07	3.41073e+07	2.42236e+07	6.57414e+07	8.93985e+07	3.23181e+06	211828	1.46575e+08	7.71181e+06	863874	2.4022e+07	1.74924e+06	5.01066e+06	793901	1.5683e+07	173520	2.27692e+06	4.98795e+07	576408	131849	1.49383e+07	1.28857e+06	1.87955e+06	2.11413e+06	1.12278e+08	111955	58679.2	4.07368e+06	2.85157e+06	1.57393e+06	1.21558e+08	2.40593e+08	1.59835e+07	3.58718e+07	1.07467e+06	4.29805e+06	444776
CS25040	264 C1 d21	carboplatin d21	264	OvC8		7.28084e+07	2.34237e+07	3.27684e+07	2.47451e+06	1.75669e+06	2.23781e+06	6.2359e+07	4.31842e+07	3.49851e+07	2.81216e+07	7.63017e+07	9.93491e+07	3.44745e+06	207981	1.84962e+08	8.69808e+06	969667	2.60452e+07	2.18732e+06	5.59501e+06	883978	1.62577e+07	179307	1.15335e+06	4.37657e+07	496773	119722	1.7785e+07	1.64862e+06	3.0252e+06	2.45869e+06	1.19044e+08	121004	26108	4.10551e+06	3.11111e+06	2.20972e+06	1.19825e+08	2.23828e+08	1.48972e+07	3.54546e+07	1.02825e+06	4.18695e+06	430784
CS25041	264 C2 d21	carboplatin d21	264	OvC8		8.24943e+07	2.13209e+07	2.9692e+07	2.32465e+06	2.1395e+06	1.84869e+06	7.3039e+07	4.11659e+07	3.23558e+07	2.32926e+07	7.016e+07	9.4294e+07	3.1844e+06	215308	1.94516e+08	7.99895e+06	972431	3.78856e+07	2.15136e+06	4.85141e+06	817870	1.84319e+07	167511	1.65285e+06	5.13677e+07	535769	122050	1.50903e+07	1.40713e+06	2.69041e+06	2.12565e+06	1.13691e+08	118404	7972.95	4.33225e+06	2.75238e+06	2.14485e+06	1.13325e+08	2.12841e+08	1.57927e+07	2.92899e+07	945608	4.27424e+06	437425
CS25042	264 D1 d14	paclitaxel d14	264	OvC8		9.05955e+07	2.25958e+07	3.05237e+07	2.30277e+06	1.93994e+06	3.35208e+06	8.05348e+07	3.81898e+07	3.37581e+07	2.53232e+07	6.79606e+07	9.5093e+07	3.33052e+06	229103	1.53459e+08	8.42099e+06	936092	2.5649e+07	1.89984e+06	5.10424e+06	787338	1.29777e+07	187295	4.58599e+06	4.72249e+07	514309	121092	1.31333e+07	544958	2.88557e+06	2.22751e+06	1.17487e+08	127329	141886	3.74437e+06	2.85691e+06	1.68545e+06	1.17776e+08	2.35097e+08	1.52988e+07	3.19189e+07	1.10249e+06	4.14587e+06	424210
CS25043	264 D2 d14	paclitaxel d14	264	OvC8		8.60717e+07	2.22579e+07	2.79637e+07	2.18123e+06	3.08508e+06	2.99521e+06	7.66686e+07	3.80654e+07	3.42645e+07	2.49742e+07	6.34939e+07	8.60946e+07	3.01267e+06	187400	1.38698e+08	7.93381e+06	897874	2.38023e+07	1.74408e+06	4.796e+06	769930	1.51928e+07	149214	1.13411e+06	4.56149e+07	493746	115154	1.54025e+07	401594	2.92243e+06	2.13732e+06	1.11585e+08	120064	128878	4.04697e+06	2.72267e+06	1.60791e+06	1.20969e+08	2.31696e+08	1.41968e+07	3.18421e+07	917444	4.41019e+06	409375
CS25044	264 D1 d21	paclitaxel d21	264	OvC8		6.5971e+07	2.17933e+07	3.13525e+07	2.51083e+06	1.95284e+06	1.7373e+06	5.60009e+07	3.96152e+07	3.22677e+07	2.59069e+07	7.49146e+07	9.72354e+07	3.36017e+06	258813	1.57918e+08	8.37637e+06	916844	2.68354e+07	2.19078e+06	5.21198e+06	864378	1.42643e+07	171789	2.42638e+06	4.68397e+07	502688	116224	1.60476e+07	239918	2.64681e+06	2.4484e+06	1.19913e+08	111182	173218	4.27596e+06	2.86064e+06	2.44332e+06	1.09899e+08	2.20176e+08	1.72168e+07	2.94507e+07	1.02689e+06	4.55743e+06	436743
CS25045	264 D2 d21	paclitaxel d21	264	OvC8		6.98835e+07	2.24585e+07	3.04535e+07	2.59384e+06	1.96992e+06	1.76998e+06	6.00884e+07	3.99967e+07	3.47997e+07	2.61539e+07	8.057e+07	1.0143e+08	3.35397e+06	225595	1.37053e+08	8.29264e+06	1.02152e+06	2.54944e+07	1.93306e+06	5.34354e+06	800824	1.73232e+07	143735	1.58756e+06	4.9873e+07	462395	107653	1.55779e+07	2.74687e+06	2.55537e+06	2.65217e+06	1.20668e+08	115913	103384	4.07687e+06	3.00792e+06	2.40018e+06	1.18857e+08	2.31425e+08	1.54042e+07	3.14833e+07	1.09349e+06	4.19901e+06	416104
CS25046	264 E1 d14	carboplatin + paclitaxel d14	264	OvC8		7.34141e+07	2.48986e+07	3.19263e+07	2.68237e+06	2.19254e+06	3.93971e+06	6.26363e+07	4.51651e+07	3.16384e+07	2.78279e+07	7.42294e+07	1.00584e+08	3.83974e+06	246037	1.53162e+08	8.98293e+06	1.01996e+06	2.70509e+07	2.01151e+06	5.59611e+06	961321	1.27977e+07	170073	949054	4.34879e+07	556027	127475	1.82614e+07	714163	3.43301e+06	2.53371e+06	1.35758e+08	128565	59777.2	4.84225e+06	3.14607e+06	1.96257e+06	1.09052e+08	2.16075e+08	1.37415e+07	2.63798e+07	1.1927e+06	4.51433e+06	453064
CS25047	264 E2 d14	carboplatin + paclitaxel d14	264	OvC8		7.13771e+07	2.24127e+07	3.03933e+07	2.12828e+06	2.27942e+06	3.33217e+06	6.03739e+07	3.77145e+07	3.39502e+07	2.72783e+07	6.50559e+07	8.42348e+07	3.17027e+06	212164	1.27965e+08	8.28276e+06	914032	2.43491e+07	1.83223e+06	4.92133e+06	872661	1.29094e+07	143198	848325	4.63992e+07	552956	126106	1.73486e+07	729729	3.06705e+06	2.20358e+06	1.14844e+08	113606	72870	3.61029e+06	2.93485e+06	1.55576e+06	1.20849e+08	2.12621e+08	1.39379e+07	3.05721e+07	1.03082e+06	4.07284e+06	429104
CS25048	264 E1 d21	carboplatin + paclitaxel d21	264	OvC8		7.47639e+07	2.42915e+07	3.3201e+07	2.43115e+06	1.90859e+06	2.00462e+06	6.43023e+07	4.02317e+07	3.36553e+07	2.86248e+07	7.2734e+07	9.46504e+07	3.65952e+06	258028	1.65562e+08	8.90041e+06	957637	2.49992e+07	2.27162e+06	5.58789e+06	791381	1.33487e+07	160985	1.78625e+06	4.4318e+07	491147	114588	1.7493e+07	573898	2.77571e+06	2.6495e+06	1.27394e+08	124757	12640.7	4.32772e+06	3.24828e+06	2.4759e+06	1.21187e+08	2.04594e+08	1.37402e+07	3.03268e+07	1.07462e+06	4.37025e+06	400922
CS25049	264 E2 d21	carboplatin + paclitaxel d21	264	OvC8		6.28575e+07	2.08259e+07	3.05304e+07	2.08924e+06	2.29385e+06	1.71481e+06	5.37246e+07	3.75894e+07	3.3881e+07	2.5236e+07	6.82466e+07	8.88376e+07	3.00172e+06	210291	1.4418e+08	7.66886e+06	913368	2.49119e+07	2.17732e+06	5.02784e+06	743968	1.46033e+07	161115	1.12461e+06	4.28379e+07	500436	116713	1.55852e+07	381138	2.47963e+06	2.35268e+06	1.09478e+08	108375	30449.1	4.12948e+06	2.89545e+06	2.4698e+06	1.07166e+08	2.13063e+08	1.48018e+07	2.70664e+07	1.08547e+06	4.72896e+06	411030
CS25050	265 B1 d14	untreated d14	265	OvC5		6.94016e+07	2.25118e+07	3.18978e+07	2.33393e+06	2.08144e+06	3.09959e+06	5.94948e+07	3.88198e+07	3.31804e+07	2.53886e+07	6.78242e+07	8.79607e+07	3.4414e+06	205068	1.23716e+08	8.44761e+06	952822	2.68404e+07	1.8755e+06	4.88361e+06	700128	1.56989e+07	206891	637969	4.37623e+07	506056	116110	1.56959e+07	22457.7	2.9805e+06	2.54492e+06	1.21383e+08	119636	344540	4.5677e+06	2.72908e+06	1.90404e+06	1.25282e+08	2.25502e+08	1.67024e+07	3.3807e+07	1.46485e+06	4.45834e+06	441474
CS25051	265 B2 d14	untreated d14	265	OvC5		6.60423e+07	2.10702e+07	3.02344e+07	2.21768e+06	1.94481e+06	2.88752e+06	5.67198e+07	3.6818e+07	3.31228e+07	2.56055e+07	6.30741e+07	9.01016e+07	3.11943e+06	223529	1.06873e+08	7.84963e+06	753136	2.57619e+07	1.81969e+06	4.66107e+06	666690	1.50293e+07	181267	753216	4.30254e+07	531596	123994	1.49148e+07	52336.8	2.75464e+06	2.26327e+06	1.10983e+08	114041	836889	4.15594e+06	2.62687e+06	1.67207e+06	1.15281e+08	2.25261e+08	1.49203e+07	3.68486e+07	1.00213e+06	4.5301e+06	440126
CS25052	265 B1 d21	untreated d21	265	OvC5		7.12095e+07	2.3075e+07	3.05505e+07	2.50281e+06	2.14635e+06	1.67765e+06	6.07882e+07	4.10742e+07	3.32883e+07	2.84873e+07	7.33206e+07	9.63455e+07	3.48932e+06	229225	1.27772e+08	8.87308e+06	966829	2.74008e+07	2.18372e+06	5.30123e+06	750381	1.76671e+07	190858	773522	4.30069e+07	539240	123714	1.67436e+07	216490	3.1263e+06	2.56064e+06	1.23647e+08	126859	406355	4.41609e+06	2.96777e+06	3.06703e+06	1.23652e+08	2.23734e+08	1.53665e+07	3.64081e+07	1.07808e+06	4.23731e+06	427877
CS25053	265 B2 d21	untreated d21	265	OvC5		8.50305e+07	2.1209e+07	2.98853e+07	2.27779e+06	2.12253e+06	1.51163e+06	7.57973e+07	3.71488e+07	3.39459e+07	2.52471e+07	6.75752e+07	9.22946e+07	3.07853e+06	218396	1.06696e+08	7.99794e+06	846710	2.72775e+07	1.98302e+06	4.81436e+06	670576	1.71674e+07	169134	897923	4.35599e+07	535450	122802	1.45091e+07	159462	2.44405e+06	2.26732e+06	1.06471e+08	111648	927637	4.40667e+06	2.77787e+06	2.41533e+06	1.21261e+08	2.2951e+08	1.39212e+07	3.62966e+07	1.14285e+06	4.21797e+06	465635
CS25054	265 C1 d14	carboplatin d14	265	OvC5		7.06741e+07	2.23402e+07	3.19249e+07	2.2757e+06	2.0682e+06	3.10668e+06	6.07884e+07	3.83077e+07	3.2109e+07	2.58879e+07	7.21669e+07	8.88504e+07	3.23775e+06	244533	1.40058e+08	8.45944e+06	937709	2.86501e+07	2.02936e+06	5.05496e+06	800682	1.42448e+07	222559	675081	4.35355e+07	531933	121971	1.64154e+07	232149	3.26798e+06	2.34568e+06	1.2023e+08	122142	165403	4.03663e+06	2.84474e+06	1.94809e+06	7.78346e+07	2.29612e+08	1.62292e+07	3.34145e+07	1.30214e+06	4.00267e+06	455949
CS25055	265 C2 d14	carboplatin d14	265	OvC5		6.45822e+07	2.08261e+07	3.03077e+07	2.17933e+06	1.93484e+06	2.93099e+06	5.50782e+07	3.78927e+07	3.27587e+07	2.50128e+07	6.37283e+07	8.44499e+07	3.02591e+06	234084	1.32483e+08	8.07323e+06	840001	2.71598e+07	1.71754e+06	4.64551e+06	781810	1.5539e+07	196518	488788	4.55014e+07	508708	122532	1.50115e+07	282168	3.02867e+06	2.22585e+06	1.12342e+08	111813	408483	3.75623e+06	2.65333e+06	1.45021e+06	7.66956e+07	2.13066e+08	1.35235e+07	3.52001e+07	1.17746e+06	4.51108e+06	403041
CS25056	265 C1 d21	carboplatin d21	265	OvC5		7.04007e+07	2.31679e+07	3.1397e+07	2.61324e+06	1.96294e+06	1.62155e+06	6.04327e+07	4.05232e+07	3.35362e+07	2.65472e+07	7.0505e+07	9.86667e+07	3.24388e+06	233709	1.91666e+08	8.47496e+06	987706	2.79712e+07	2.18265e+06	5.10769e+06	735820	1.02085e+07	176815	806321	4.34927e+07	539994	123911	1.64979e+07	922563	2.97244e+06	2.42521e+06	1.19388e+08	120487	35945.1	4.3793e+06	2.90849e+06	2.62527e+06	1.24646e+08	2.21954e+08	1.60478e+07	3.05459e+07	1.16312e+06	4.42011e+06	426627
CS25057	265 C2 d21	carboplatin d21	265	OvC5		6.76114e+07	2.17575e+07	3.06043e+07	2.40305e+06	1.75371e+06	1.76452e+06	5.80684e+07	3.85731e+07	3.27589e+07	2.78144e+07	6.80525e+07	9.52603e+07	3.28566e+06	211746	1.78602e+08	8.07891e+06	965902	2.82327e+07	2.02583e+06	5.17278e+06	731059	1.73881e+07	152242	336968	4.30391e+07	531645	125817	1.48447e+07	1.40316e+06	2.75369e+06	2.63939e+06	1.1586e+08	117135	1.16259e+06	4.31267e+06	3.01351e+06	2.62555e+06	1.21891e+08	2.17905e+08	1.29985e+07	3.44048e+07	1.12334e+06	4.12642e+06	417984
CS25058	265 D1 d14	paclitaxel d14	265	OvC5		7.60673e+07	2.39724e+07	3.2104e+07	2.3465e+06	1.81511e+06	3.34812e+06	6.54365e+07	3.86282e+07	3.30274e+07	2.62668e+07	6.50905e+07	8.99328e+07	3.24953e+06	230734	1.14436e+08	8.86458e+06	947280	2.8806e+07	1.92432e+06	4.73922e+06	790577	1.24979e+07	219074	555222	4.27291e+07	566284	139266	1.78513e+07	26886.1	2.88337e+06	2.52928e+06	1.17261e+08	121796	192629	4.42111e+06	2.64201e+06	1.89533e+06	1.10313e+08	2.19642e+08	1.3622e+07	3.39486e+07	1.10412e+06	4.35122e+06	433927
CS25059	265 D2 d14	paclitaxel d14	265	OvC5		7.29108e+07	2.25816e+07	2.8773e+07	2.14487e+06	1.6719e+06	3.44524e+06	6.04895e+07	3.61456e+07	3.17698e+07	2.64921e+07	6.57255e+07	8.1955e+07	3.31134e+06	240837	9.62302e+07	1.09389e+07	952038	3.96729e+07	1.99678e+06	4.85083e+06	712292	1.39382e+07	220983	769896	4.29097e+07	529510	121477	1.63821e+07	29256.9	3.21323e+06	2.19862e+06	1.12866e+08	116981	379115	3.81819e+06	2.77409e+06	1.88885e+06	1.23983e+08	2.23342e+08	1.54692e+07	3.3015e+07	1.35239e+06	4.43326e+06	415708
CS25060	265 D1 d21	paclitaxel d21	265	OvC5		7.06793e+07	2.30413e+07	3.15766e+07	2.47711e+06	2.02803e+06	1.81987e+06	6.04442e+07	3.92023e+07	3.2644e+07	2.68995e+07	7.12286e+07	9.83076e+07	3.33383e+06	250870	1.48316e+08	8.80996e+06	918009	2.67607e+07	2.19785e+06	4.96553e+06	773562	1.71066e+07	162723	361735	4.19409e+07	510983	119728	1.66571e+07	130459	3.08804e+06	2.36375e+06	1.17775e+08	114554	115603	4.31675e+06	2.79046e+06	2.78765e+06	1.25812e+08	2.36601e+08	1.37785e+07	2.71075e+07	1.03374e+06	4.18381e+06	437303
CS25061	265 D2 d21	paclitaxel d21	265	OvC5		8.58391e+07	2.14044e+07	2.98244e+07	2.3949e+06	2.38614e+06	1.78464e+06	7.64384e+07	3.87957e+07	3.34035e+07	2.41576e+07	6.68446e+07	9.30852e+07	3.10479e+06	222625	1.13667e+08	8.14275e+06	871355	2.53332e+07	2.15014e+06	4.72521e+06	671599	1.63378e+07	164662	537369	4.39133e+07	504680	115854	1.56536e+07	195306	3.11852e+06	2.19481e+06	1.11844e+08	109617	424200	4.10915e+06	2.67314e+06	2.41738e+06	1.32283e+08	2.18157e+08	1.59257e+07	3.68957e+07	1.1328e+06	4.4788e+06	379632
CS25062	265 E1 d14	carboplatin + paclitaxel d14	265	OvC5		7.82154e+07	2.47481e+07	3.24396e+07	2.6826e+06	1.60877e+06	3.58347e+06	6.73668e+07	4.42819e+07	3.09261e+07	2.78322e+07	8.30951e+07	1.09451e+08	3.79875e+06	258424	2.00029e+08	9.1064e+06	1.05121e+06	2.86339e+07	2.10543e+06	5.82612e+06	915619	1.80945e+07	152122	555531	4.4027e+07	494372	113376	1.79064e+07	780273	3.87771e+06	2.39487e+06	1.34607e+08	126740	49916.6	4.06518e+06	3.29874e+06	2.09479e+06	7.94587e+07	2.14976e+08	1.3175e+07	2.81206e+07	1.15765e+06	4.18151e+06	418884
CS25063	265 E2 d14	carboplatin + paclitaxel d14	265	OvC5		6.89511e+07	2.1894e+07	2.8922e+07	2.59698e+06	1.73696e+06	3.15463e+06	5.90397e+07	3.85992e+07	3.15601e+07	2.51112e+07	7.71877e+07	9.71776e+07	3.15433e+06	223840	1.8809e+08	8.58358e+06	912379	2.72055e+07	1.73651e+06	4.96057e+06	739020	1.0565e+07	150983	599985	4.64632e+07	554656	130380	1.52249e+07	1.43759e+06	2.78607e+06	2.15932e+06	1.14021e+08	125201	45231.9	3.25606e+06	2.78512e+06	1.93609e+06	1.29598e+08	2.41624e+08	1.31959e+07	2.85302e+07	1.30849e+06	4.46054e+06	422856
CS25064	265 E1 d21	carboplatin + paclitaxel d21	265	OvC5		7.55114e+07	2.43667e+07	3.20079e+07	2.85093e+06	1.71101e+06	2.11038e+06	6.51562e+07	5.05729e+07	3.30309e+07	2.7063e+07	8.10403e+07	1.18892e+08	3.70243e+06	256279	2.34066e+08	8.66242e+06	1.04411e+06	2.63734e+07	2.45274e+06	5.76687e+06	836920	2.25066e+07	180261	2.12156e+06	4.19512e+07	537883	123320	1.78104e+07	1.74665e+06	3.39553e+06	2.62016e+06	1.33476e+08	128267	17427.2	3.39527e+06	3.28811e+06	2.6133e+06	1.14118e+08	2.32711e+08	1.29358e+07	3.01978e+07	1.32835e+06	4.79674e+06	454650
CS25065	265 E2 d21	carboplatin + paclitaxel d21	265	OvC5		6.80216e+07	2.03371e+07	3.08995e+07	2.7957e+06	1.66496e+06	1.94542e+06	5.86418e+07	4.3329e+07	3.22994e+07	2.45808e+07	7.94744e+07	9.82514e+07	3.16771e+06	219082	2.19343e+08	7.83319e+06	855896	2.67732e+07	2.26481e+06	5.17564e+06	726741	1.22981e+07	172956	1.67701e+06	4.19105e+07	518862	125592	1.53983e+07	1.75628e+06	2.47067e+06	1.98765e+06	1.11719e+08	113781	8160.73	2.15555e+06	2.9723e+06	2.426e+06	1.1513e+08	2.43629e+08	1.26411e+07	2.92867e+07	996683	4.49662e+06	407276
CS25066	268 B1 d14	untreated d14	268	OvC1		6.72064e+07	2.20168e+07	3.16788e+07	2.32826e+06	2.11524e+06	904291	5.74308e+07	3.47979e+07	3.43715e+07	2.54245e+07	7.06689e+07	9.24813e+07	3.20066e+06	207850	1.10398e+08	8.15367e+06	953259	2.66497e+07	2.163e+06	5.18986e+06	817039	1.5147e+07	158783	844927	5.15283e+07	592604	134670	1.58706e+07	314948	2.83712e+06	2.10685e+06	1.20777e+08	118048	124554	5.2501e+06	2.90086e+06	2.68819e+06	1.17065e+08	2.43031e+08	1.67587e+07	3.55666e+07	1.07663e+06	4.84143e+06	446853
CS25067	268 B2 d14	untreated d14	268	OvC1		8.174e+07	2.08593e+07	3.04393e+07	2.15963e+06	2.01178e+06	904090	7.24256e+07	3.15212e+07	3.19414e+07	2.56786e+07	7.0388e+07	9.17125e+07	3.30378e+06	189335	1.27961e+08	7.75838e+06	915348	2.4054e+07	1.9477e+06	4.98965e+06	802791	1.74888e+07	186220	940133	4.93063e+07	516836	117391	1.47354e+07	310662	2.39695e+06	2.40228e+06	1.1392e+08	111088	85552	4.86938e+06	2.86418e+06	2.31074e+06	1.14781e+08	2.41614e+08	1.50446e+07	2.8513e+07	1.20552e+06	4.99819e+06	476703
CS25068	268 B1 d21	untreated d21	268	OvC1		6.92748e+07	2.26258e+07	2.96417e+07	2.62653e+06	1.77987e+06	960790	5.94901e+07	3.52842e+07	3.18527e+07	2.52652e+07	7.48163e+07	9.9017e+07	3.553e+06	215172	1.14854e+08	8.32899e+06	957994	2.47269e+07	2.22779e+06	5.2154e+06	881963	1.41096e+07	147520	851008	4.73539e+07	523738	120618	1.54885e+07	416042	2.52414e+06	2.25189e+06	1.20557e+08	119191	170320	5.43311e+06	3.01425e+06	2.44764e+06	1.16425e+08	2.26983e+08	1.4927e+07	3.09101e+07	1.1439e+06	4.33232e+06	451522
CS25069	268 B2 d21	untreated d21	268	OvC1		6.72627e+07	2.2652e+07	3.24038e+07	2.37217e+06	1.72391e+06	987483	5.72792e+07	3.54893e+07	3.34932e+07	2.68208e+07	7.19464e+07	9.6045e+07	3.34514e+06	217312	1.38204e+08	8.46864e+06	1.06113e+06	2.8275e+07	2.16902e+06	5.13074e+06	835163	1.57532e+07	175408	1.09143e+06	4.43667e+07	524417	123073	1.57454e+07	234794	2.94431e+06	1.41908e+06	1.17114e+08	115807	109355	5.22768e+06	2.86991e+06	2.56284e+06	1.20422e+08	2.27717e+08	1.5601e+07	3.15961e+07	1.28816e+06	4.54146e+06	407004
CS25070	268 C1 d14	carboplatin d14	268	OvC1		6.66058e+07	2.19659e+07	3.13892e+07	2.27738e+06	2.12226e+06	999161	5.69681e+07	3.33114e+07	3.32898e+07	2.55486e+07	6.91968e+07	8.42245e+07	3.16259e+06	226114	1.43446e+08	8.15499e+06	935003	2.49444e+07	2.10051e+06	4.65802e+06	730941	1.59842e+07	174070	391314	4.64692e+07	546216	127437	1.59412e+07	700888	2.90099e+06	2.07402e+06	1.16699e+08	109379	37194.7	4.61139e+06	2.60667e+06	2.54252e+06	1.17861e+08	2.32693e+08	1.633e+07	3.1038e+07	1.07969e+06	4.25671e+06	445783
CS25071	268 C2 d14	carboplatin d14	268	OvC1		6.50137e+07	2.18392e+07	2.97997e+07	2.18277e+06	2.29736e+06	939158	5.57977e+07	3.28753e+07	3.1907e+07	2.52901e+07	6.44352e+07	8.63979e+07	3.18234e+06	217452	1.64652e+08	7.71343e+06	923282	2.73311e+07	1.98496e+06	5.06133e+06	767666	1.53537e+07	167533	600772	4.72215e+07	500587	113573	1.56602e+07	824817	2.52623e+06	2.19399e+06	1.1298e+08	114361	22959.7	5.16054e+06	2.8144e+06	2.65728e+06	1.12886e+08	2.28112e+08	1.61817e+07	2.81774e+07	1.11475e+06	4.13532e+06	436145
CS25072	268 C1 d21	carboplatin d21	268	OvC1		6.82547e+07	2.22569e+07	3.26358e+07	2.45816e+06	1.75337e+06	1.06349e+06	5.84104e+07	3.59674e+07	3.33708e+07	2.62566e+07	7.16523e+07	9.50042e+07	3.41606e+06	207654	1.56565e+08	8.2891e+06	954365	2.70468e+07	2.04701e+06	5.3741e+06	847994	1.58673e+07	168135	550606	4.76454e+07	467174	106232	1.67179e+07	606276	2.94202e+06	2.58967e+06	1.20864e+08	116750	26407.9	5.50036e+06	3.07174e+06	2.69144e+06	1.17273e+08	2.37241e+08	1.66009e+07	2.93004e+07	1.36559e+06	4.03658e+06	410987
CS25073	268 C2 d21	carboplatin d21	268	OvC1		6.51796e+07	2.18088e+07	2.943e+07	2.63654e+06	1.98713e+06	1.00945e+06	5.55741e+07	3.51803e+07	3.36649e+07	2.54749e+07	7.33853e+07	1.05745e+08	3.30579e+06	201826	1.68258e+08	8.1078e+06	963283	2.41511e+07	2.05684e+06	5.00911e+06	827386	1.73109e+07	144351	523859	4.40689e+07	543727	124344	1.62718e+07	701549	2.72252e+06	2.20331e+06	1.14891e+08	112706	12505.9	5.48025e+06	2.80495e+06	2.48376e+06	1.14035e+08	2.16941e+08	1.65261e+07	2.98973e+07	1.10376e+06	4.08198e+06	431194
CS25074	268 D1 d14	paclitaxel d14	268	OvC1		7.79025e+07	2.55974e+07	3.36667e+07	2.5771e+06	1.98775e+06	1.18191e+06	6.6814e+07	4.08041e+07	3.45999e+07	2.85117e+07	8.06474e+07	1.01961e+08	3.92896e+06	233614	1.77338e+08	9.24252e+06	1.04292e+06	2.63244e+07	2.36385e+06	5.70179e+06	926599	1.51458e+07	151508	650533	4.24492e+07	503546	115517	1.91925e+07	319436	3.30412e+06	2.65124e+06	1.31918e+08	134524	26533.3	4.85735e+06	3.19281e+06	2.76011e+06	1.23836e+08	2.32199e+08	1.71535e+07	2.75631e+07	1.13015e+06	4.20642e+06	426934
CS25075	268 D2 d14	paclitaxel d14	268	OvC1		6.93593e+07	2.31247e+07	3.17606e+07	2.27749e+06	1.89064e+06	1.01408e+06	5.97992e+07	4.00618e+07	3.36623e+07	2.49323e+07	6.88148e+07	8.68202e+07	3.2288e+06	223686	1.62467e+08	7.98666e+06	866751	2.58519e+07	2.05081e+06	4.85142e+06	827744	1.50975e+07	150762	488628	4.48217e+07	543139	123634	1.64063e+07	168236	2.57277e+06	2.22551e+06	1.16015e+08	120822	39269.1	4.82921e+06	2.76564e+06	2.59611e+06	1.16617e+08	2.27419e+08	1.64032e+07	3.05334e+07	1.04385e+06	4.47267e+06	447315
CS25076	268 D1 d21	paclitaxel d21	268	OvC1		6.675e+07	2.21917e+07	3.10066e+07	2.40333e+06	1.95187e+06	905762	5.72631e+07	3.57657e+07	3.25568e+07	2.62092e+07	6.86877e+07	9.35537e+07	3.14961e+06	210776	1.75869e+08	7.97132e+06	928650	2.51713e+07	2.07179e+06	5.06451e+06	810679	1.6476e+07	151317	1.32463e+06	4.5827e+07	553004	125710	1.57153e+07	175392	2.73133e+06	2.29803e+06	1.16264e+08	111116	20836.1	5.03083e+06	2.8951e+06	2.43253e+06	1.15313e+08	2.33312e+08	1.49921e+07	3.09525e+07	1.10381e+06	4.54984e+06	435894
CS25077	268 D2 d21	paclitaxel d21	268	OvC1		6.48915e+07	2.11036e+07	3.02281e+07	2.24774e+06	1.75434e+06	944570	5.55193e+07	3.61964e+07	3.24938e+07	2.5174e+07	6.61723e+07	8.85716e+07	3.23503e+06	216678	1.72275e+08	7.96677e+06	924088	2.70674e+07	2.03541e+06	4.80841e+06	800196	1.59632e+07	173690	1.33818e+06	4.44782e+07	578355	131806	1.50479e+07	116946	2.95366e+06	2.18946e+06	1.09718e+08	114818	27195.5	5.01581e+06	2.65862e+06	2.51835e+06	1.17354e+08	2.23041e+08	1.62363e+07	2.85847e+07	1.22945e+06	4.38104e+06	484094
CS25078	268 E1 d14	carboplatin + paclitaxel d14	268	OvC1		9.0519e+07	2.35409e+07	3.26732e+07	2.42589e+06	2.01679e+06	1.06713e+06	8.03151e+07	4.11135e+07	3.22772e+07	2.78299e+07	7.50669e+07	9.85265e+07	3.727e+06	222272	1.82686e+08	8.42828e+06	975855	2.54729e+07	2.2651e+06	5.42202e+06	851153	1.51699e+07	158271	608439	4.57799e+07	498400	116581	1.79916e+07	524064	3.04566e+06	2.39325e+06	1.29783e+08	121509	8741.14	5.0476e+06	3.04024e+06	2.67895e+06	1.13573e+08	2.22605e+08	1.44284e+07	2.7578e+07	1.37067e+06	4.91887e+06	438962
CS25079	268 E2 d14	carboplatin + paclitaxel d14	268	OvC1		7.26865e+07	2.45551e+07	3.08722e+07	2.46723e+06	2.24523e+06	955537	6.22904e+07	3.73134e+07	3.4218e+07	2.57397e+07	7.00724e+07	9.51147e+07	3.10579e+06	217275	1.82095e+08	8.69356e+06	926578	2.49017e+07	2.02004e+06	5.12058e+06	759310	1.74511e+07	152964	739621	4.49391e+07	524912	120387	1.70902e+07	774414	2.98263e+06	2.25389e+06	1.16649e+08	113446	13733.5	4.04901e+06	2.84089e+06	2.59842e+06	1.21208e+08	2.33161e+08	1.54469e+07	2.8312e+07	980890	4.28084e+06	451395
CS25080	268 E1 d21	carboplatin + paclitaxel d21	268	OvC1		6.75192e+07	2.17391e+07	2.92432e+07	2.56526e+06	1.73237e+06	975104	5.79965e+07	3.3706e+07	3.24123e+07	2.43695e+07	6.96632e+07	8.95758e+07	3.19801e+06	217391	1.77026e+08	8.06166e+06	983449	2.78497e+07	2.01252e+06	4.83884e+06	695162	1.54326e+07	142274	853627	4.97994e+07	475415	108949	1.53224e+07	405518	2.16203e+06	2.21159e+06	1.11894e+08	112070	16108.4	4.79411e+06	2.8133e+06	2.36264e+06	1.15649e+08	2.27835e+08	1.33497e+07	2.99665e+07	1.10897e+06	4.51213e+06	396759
CS25081	268 E2 d21	carboplatin + paclitaxel d21	268	OvC1		6.94348e+07	2.29005e+07	2.99386e+07	2.68933e+06	1.76829e+06	989622	5.96146e+07	3.70381e+07	3.35424e+07	2.56161e+07	7.21797e+07	9.53995e+07	3.22755e+06	213986	1.89607e+08	8.23939e+06	879843	2.40269e+07	2.0805e+06	5.01906e+06	729925	1.74086e+07	150351	1.14512e+06	4.64049e+07	562961	128361	1.62357e+07	357792	2.57456e+06	2.27165e+06	1.15109e+08	120351	10400.6	4.25889e+06	2.8585e+06	2.6781e+06	1.22281e+08	2.32131e+08	1.34077e+07	2.84078e+07	1.02103e+06	4.52156e+06	518673
CS25082	279 B1 d14	untreated d14	279	OvC9		7.11362e+07	2.31532e+07	2.98575e+07	2.46595e+06	2.01282e+06	1.54849e+06	6.11071e+07	3.78168e+07	3.39504e+07	2.71742e+07	7.87676e+07	9.92897e+07	3.52147e+06	216641	6.05856e+07	8.4165e+06	983985	2.54734e+07	2.38195e+06	5.20482e+06	851517	1.3085e+07	965171	630261	5.27441e+07	595898	141104	1.63769e+07	277985	2.86993e+06	2.65987e+06	1.26451e+08	115425	1.04133e+06	4.52207e+06	2.95912e+06	3.60794e+06	1.29778e+08	2.4962e+08	1.87812e+07	3.31413e+07	1.00341e+06	4.83236e+06	527532
CS25083	279 B2 d14	untreated d14	279	OvC9		6.07582e+07	1.9607e+07	2.77551e+07	2.12016e+06	2.04985e+06	3.8289e+06	5.20779e+07	2.72716e+07	3.48191e+07	2.47802e+07	6.68103e+07	8.28462e+07	3.16856e+06	178213	3.58106e+07	7.33024e+06	873099	2.32879e+07	2.01443e+06	4.50837e+06	773885	1.31342e+07	788352	6.83535e+06	4.98383e+07	510240	121441	1.24567e+07	105353	2.56389e+06	2.28657e+06	1.12194e+08	100741	508852	3.42771e+06	2.56592e+06	2.86807e+06	1.37856e+08	2.46452e+08	1.6618e+07	3.73932e+07	860608	4.7204e+06	376722
CS25084	279 B1 d21	untreated d21	279	OvC9		9.61006e+07	2.37491e+07	3.15986e+07	2.59469e+06	2.13678e+06	1.11981e+06	8.54492e+07	4.56742e+07	3.46672e+07	2.73576e+07	7.39473e+07	9.4609e+07	3.63239e+06	211986	1.29966e+08	8.8684e+06	1.04961e+06	2.52905e+07	2.40404e+06	5.7284e+06	927218	1.812e+07	257731	1.54792e+06	5.04448e+07	501004	114392	1.73778e+07	331171	3.15066e+06	2.18658e+06	1.30543e+08	121468	190134	4.91532e+06	3.22118e+06	3.82636e+06	1.22566e+08	2.26156e+08	1.8694e+07	3.00767e+07	1.05655e+06	4.41903e+06	394611
CS25085	279 B2 d21	untreated d21	279	OvC9		6.73624e+07	2.21383e+07	3.08975e+07	2.45229e+06	2.27374e+06	1.24068e+06	5.76689e+07	4.29655e+07	3.36762e+07	2.49553e+07	7.62221e+07	9.98754e+07	3.23773e+06	207024	1.85671e+08	8.18062e+06	1.05606e+06	2.98003e+07	2.18192e+06	4.87318e+06	756688	1.77906e+07	171985	2.41824e+07	4.3465e+07	497931	114335	1.60045e+07	934970	2.73857e+06	2.09905e+06	1.15796e+08	112065	76431.3	4.29407e+06	2.7963e+06	3.78909e+06	1.13458e+08	2.26656e+08	1.51368e+07	2.5384e+07	1.12613e+06	4.20419e+06	437245
CS25086	279 C1 d14	carboplatin d14	279	OvC9		8.60169e+07	2.21615e+07	2.84196e+07	2.23033e+06	2.17058e+06	2.02247e+06	7.62762e+07	3.39446e+07	3.30804e+07	2.51391e+07	6.87684e+07	8.83366e+07	3.6938e+06	212640	5.7914e+07	8.20667e+06	977658	2.70801e+07	2.30149e+06	5.07426e+06	867005	1.19294e+07	1.18287e+06	2.05754e+06	4.9399e+07	572200	136608	1.59973e+07	202881	2.83414e+06	2.31818e+06	1.18358e+08	115334	844392	5.25243e+06	2.8236e+06	3.257e+06	1.23781e+08	2.41809e+08	1.67925e+07	3.2063e+07	914748	4.61186e+06	483463
CS25087	279 C2 d14	carboplatin d14	279	OvC9		6.88859e+07	2.21923e+07	2.98172e+07	2.71952e+06	1.7423e+06	1.90395e+06	5.90454e+07	3.34317e+07	3.25013e+07	2.39407e+07	7.18092e+07	8.90049e+07	3.42215e+06	227882	6.07743e+07	8.37977e+06	1.03357e+06	2.43617e+07	2.14176e+06	4.93572e+06	785884	1.23885e+07	906677	1.53347e+06	4.41251e+07	571751	134270	1.51501e+07	531131	2.84672e+06	2.12011e+06	1.20372e+08	110566	521412	4.43603e+06	2.83505e+06	2.985e+06	1.20084e+08	2.33564e+08	1.65934e+07	3.53157e+07	878565	4.25146e+06	464128
CS25088	279 C1 d21	carboplatin d21	279	OvC9		7.34821e+07	2.40681e+07	3.31986e+07	2.54393e+06	2.01763e+06	1.24939e+06	6.26573e+07	4.28232e+07	3.40672e+07	2.7808e+07	7.78599e+07	9.86152e+07	3.807e+06	218507	1.74886e+08	9.11698e+06	1.00729e+06	3.00796e+07	2.29368e+06	5.73052e+06	940040	1.59806e+07	376387	3.89705e+06	4.65721e+07	500746	122228	1.80354e+07	484780	3.04499e+06	2.57728e+06	1.37908e+08	119188	200725	4.78655e+06	3.23209e+06	3.59942e+06	1.23959e+08	2.20382e+08	1.79413e+07	2.87411e+07	1.04139e+06	4.47545e+06	421337
CS25089	279 C2 d21	carboplatin d21	279	OvC9		6.91324e+07	2.23888e+07	3.14049e+07	2.52036e+06	1.89419e+06	1.22534e+06	5.93038e+07	4.09766e+07	3.40207e+07	2.58359e+07	7.50838e+07	1.03161e+08	3.3978e+06	223304	1.68346e+08	8.26787e+06	971631	2.54501e+07	2.1656e+06	5.05682e+06	857826	1.74171e+07	203109	4.73131e+06	4.43845e+07	565798	137102	1.59246e+07	660160	2.92934e+06	2.32211e+06	1.2172e+08	116728	85616	4.47473e+06	2.84912e+06	3.43774e+06	1.09551e+08	2.08591e+08	1.55823e+07	3.31456e+07	1.07371e+06	3.94558e+06	425895
CS25090	279 D1 d14	paclitaxel d14	279	OvC9		9.89087e+07	2.45045e+07	3.13383e+07	2.94137e+06	1.60007e+06	2.43411e+06	8.83285e+07	4.06739e+07	3.36386e+07	2.81573e+07	8.9921e+07	1.08329e+08	3.71728e+06	264030	4.50318e+07	9.01058e+06	1.05235e+06	2.72581e+07	2.52413e+06	5.79582e+06	859835	1.1417e+07	1.12141e+06	959909	4.5196e+07	566884	137079	1.84728e+07	138813	3.12518e+06	2.81154e+06	1.32982e+08	126593	693139	4.87414e+06	3.27689e+06	3.85468e+06	1.17555e+08	2.29547e+08	1.72994e+07	3.38363e+07	995418	4.4598e+06	428190
CS25091	279 D2 d14	paclitaxel d14	279	OvC9		6.53941e+07	2.186e+07	3.0409e+07	2.43932e+06	1.74006e+06	1.79424e+06	5.54543e+07	3.77588e+07	3.23393e+07	2.43344e+07	7.60763e+07	9.5285e+07	3.2175e+06	225866	5.70469e+07	8.44211e+06	1.00045e+06	2.5111e+07	2.4418e+06	5.18022e+06	886692	1.31776e+07	788612	339011	4.6022e+07	547008	124016	1.61818e+07	51496	3.17779e+06	2.46635e+06	1.19155e+08	116122	480884	4.30304e+06	2.93102e+06	3.93606e+06	1.14035e+08	2.27124e+08	1.55697e+07	2.84062e+07	937901	4.36079e+06	481408
CS25092	279 D1 d21	paclitaxel d21	279	OvC9		7.59574e+07	2.48621e+07	3.02354e+07	2.66072e+06	1.8226e+06	1.17189e+06	6.35177e+07	4.33215e+07	3.25284e+07	2.74183e+07	8.86141e+07	1.06068e+08	4.05227e+06	218304	1.5553e+08	9.44881e+06	1.16064e+06	2.93438e+07	2.73521e+06	6.21026e+06	982894	1.4228e+07	516619	1.98712e+06	4.37722e+07	530659	127509	2.05062e+07	185294	2.78563e+06	2.61691e+06	1.46088e+08	133596	206495	5.133e+06	3.58764e+06	3.9231e+06	1.08698e+08	2.09315e+08	1.5976e+07	2.65225e+07	1.2722e+06	4.32521e+06	436467
CS25093	279 D2 d21	paclitaxel d21	279	OvC9		7.5033e+07	2.42126e+07	3.10351e+07	2.54482e+06	1.45801e+06	1.23754e+06	6.42888e+07	4.34295e+07	3.44146e+07	2.62647e+07	8.00591e+07	1.01137e+08	3.38275e+06	221464	9.75434e+07	9.11114e+06	952831	2.81297e+07	2.42613e+06	5.23382e+06	806358	1.44288e+07	538568	639360	4.46922e+07	526769	122545	1.68539e+07	135162	3.35155e+06	2.35838e+06	1.25263e+08	122332	501177	4.48256e+06	2.96745e+06	3.2955e+06	1.18781e+08	2.22854e+08	1.6314e+07	2.9835e+07	863584	4.03081e+06	422941
CS25094	279 E1 d14	carboplatin + paclitaxel d14	279	OvC9		7.02688e+07	2.20544e+07	3.10025e+07	2.30894e+06	1.96161e+06	1.59447e+06	6.03162e+07	3.63159e+07	3.16688e+07	2.66928e+07	7.21148e+07	9.88775e+07	3.76402e+06	219906	6.90782e+07	8.4394e+06	909105	2.42642e+07	2.21783e+06	5.15353e+06	778770	1.20417e+07	755895	664915	4.50359e+07	541713	131588	1.56751e+07	751224	3.09227e+06	2.49288e+06	1.26407e+08	115153	777235	4.66277e+06	2.96927e+06	2.87214e+06	1.15408e+08	2.15955e+08	1.58513e+07	3.23853e+07	895001	4.31918e+06	410434
CS25095	279 E2 d14	carboplatin + paclitaxel d14	279	OvC9		6.54674e+07	2.20804e+07	3.06678e+07	2.14858e+06	1.85953e+06	1.59332e+06	5.54476e+07	3.70181e+07	3.29041e+07	2.48938e+07	7.06068e+07	8.67469e+07	3.7442e+06	261225	8.05091e+07	8.44658e+06	957436	2.29349e+07	2.2209e+06	5.15716e+06	898664	1.27416e+07	578564	718169	4.43185e+07	505561	113329	1.56948e+07	1.07456e+06	2.56058e+06	2.22495e+06	1.24352e+08	112212	689735	4.00273e+06	2.92071e+06	2.95635e+06	1.1514e+08	2.28189e+08	1.43122e+07	3.31938e+07	879304	4.25371e+06	465263
CS25096	279 E1 d21	carboplatin + paclitaxel d21	279	OvC9		7.45316e+07	2.4654e+07	3.22389e+07	2.72943e+06	1.82093e+06	1.26893e+06	6.35105e+07	4.87416e+07	3.51925e+07	2.87231e+07	8.81494e+07	1.14541e+08	3.75846e+06	261615	2.21414e+08	9.21859e+06	1.10446e+06	2.74858e+07	2.52853e+06	6.01097e+06	1.00347e+06	1.07458e+07	149367	6.36777e+06	4.14133e+07	508748	115566	1.99062e+07	2.03583e+06	3.13856e+06	2.59778e+06	1.38489e+08	131342	78535.4	2.58264e+06	3.46883e+06	3.60384e+06	1.06616e+08	1.95185e+08	1.47352e+07	2.96912e+07	1.06305e+06	4.10172e+06	469228
CS25097	279 E2 d21	carboplatin + paclitaxel d21	279	OvC9		5.99067e+07	2.00057e+07	2.90936e+07	2.2266e+06	1.90319e+06	975637	5.12534e+07	4.0588e+07	3.29653e+07	2.28122e+07	6.71644e+07	9.01276e+07	2.96172e+06	187602	1.77855e+08	7.26332e+06	844538	2.48971e+07	1.93618e+06	4.68917e+06	695737	2.094e+07	169352	6.40554e+06	4.21861e+07	556367	132462	1.4672e+07	2.38025e+06	2.63136e+06	2.15887e+06	1.06663e+08	104161	67686.7	2.36677e+06	2.69171e+06	2.83878e+06	7.59222e+07	2.12991e+08	1.53181e+07	2.94046e+07	1.02014e+06	4.37815e+06	470388
CS25098	281 B1 d14	untreated d14	281	OvC4		7.01303e+07	2.2037e+07	3.1508e+07	2.6068e+06	1.7495e+06	1.05413e+06	6.0104e+07	5.08087e+07	3.37438e+07	2.77353e+07	7.76948e+07	1.02021e+08	3.88002e+06	224801	9.64383e+07	8.46491e+06	999456	2.80366e+07	2.31741e+06	5.39588e+06	903884	1.47487e+07	187176	3.14695e+06	4.58066e+07	474216	109935	1.64594e+07	1.36026e+06	3.08867e+06	2.41433e+06	1.27219e+08	119749	305839	4.30748e+06	3.01887e+06	4.01702e+06	1.31628e+08	2.2663e+08	1.72908e+07	3.58326e+07	1.28091e+06	4.40496e+06	406178
CS25099	281 B2 d14	untreated d14	281	OvC4		6.65298e+07	2.13832e+07	3.0043e+07	2.38531e+06	1.89877e+06	929844	5.70781e+07	4.34598e+07	3.34302e+07	2.63284e+07	6.96954e+07	9.11448e+07	3.32371e+06	226751	9.71768e+07	8.10836e+06	866064	2.68477e+07	2.07477e+06	5.12229e+06	751536	1.45844e+07	183010	981970	4.38765e+07	513732	117915	1.50286e+07	1.17038e+06	2.72918e+06	2.30471e+06	1.18166e+08	112883	2.81085e+06	4.32758e+06	2.85111e+06	3.51668e+06	1.28842e+08	2.30137e+08	1.64704e+07	3.64598e+07	812285	4.33697e+06	408818
CS25100	281 B1 d21	untreated d21	281	OvC4		6.78501e+07	2.18746e+07	3.07164e+07	2.28233e+06	1.58522e+06	3.4753e+06	5.86532e+07	4.91119e+07	3.41462e+07	2.62018e+07	6.90576e+07	9.59462e+07	3.17626e+06	184750	1.22858e+08	7.69493e+06	897482	2.63824e+07	2.1061e+06	5.00176e+06	758047	1.5017e+07	186143	2.06327e+06	4.37925e+07	529365	121688	1.55253e+07	1.34913e+06	3.0528e+06	2.24235e+06	1.16164e+08	108881	223692	4.16128e+06	2.83494e+06	3.32515e+06	1.12883e+08	2.2851e+08	1.53465e+07	3.58098e+07	1.03844e+06	4.35338e+06	476251
CS25101	281 B2 d21	untreated d21	281	OvC4		6.83235e+07	2.1658e+07	3.22398e+07	2.29846e+06	1.77891e+06	3.60552e+06	5.87279e+07	5.30075e+07	3.40429e+07	2.66801e+07	7.61355e+07	1.0071e+08	3.1629e+06	226220	1.33456e+08	8.07309e+06	887919	2.53874e+07	2.0865e+06	4.99797e+06	740670	1.84995e+07	186558	281051	4.08683e+07	508279	122205	1.59869e+07	1.77638e+06	2.99932e+06	2.31304e+06	1.1201e+08	122316	4.40583e+06	4.41807e+06	2.84969e+06	3.98e+06	1.17911e+08	2.27788e+08	1.49648e+07	3.70085e+07	1.15651e+06	4.48466e+06	400994
CS25102	281 C1 d14	carboplatin d14	281	OvC4		7.20448e+07	2.29124e+07	3.14284e+07	2.35624e+06	2.1578e+06	2.58274e+06	6.20593e+07	4.85894e+07	3.34371e+07	2.6707e+07	7.18604e+07	9.48124e+07	3.67993e+06	232350	1.06277e+08	8.56209e+06	1.01839e+06	2.73073e+07	2.34693e+06	5.55759e+06	1.08454e+06	1.30514e+07	192513	613201	4.53975e+07	519618	120016	1.62962e+07	1.71626e+06	2.669e+06	2.45705e+06	1.27673e+08	121838	177130	4.6169e+06	3.13198e+06	4.05898e+06	1.15581e+08	1.72688e+08	1.68923e+07	3.46497e+07	878346	4.19932e+06	441841
CS25103	281 C2 d14	carboplatin d14	281	OvC4		7.0385e+07	2.1837e+07	3.11198e+07	2.33223e+06	1.87521e+06	2.44581e+06	6.08245e+07	4.8154e+07	3.34304e+07	2.62313e+07	7.44336e+07	9.70529e+07	3.31296e+06	213085	1.64502e+08	8.14446e+06	967375	2.97758e+07	2.22234e+06	5.19445e+06	691419	1.56945e+07	176369	1.00164e+06	4.00699e+07	496013	113771	1.64382e+07	1.94816e+06	3.06564e+06	2.19802e+06	1.17991e+08	115099	44424.8	4.56322e+06	2.92719e+06	3.743e+06	1.1686e+08	2.31781e+08	1.69318e+07	3.52683e+07	949746	4.30107e+06	374282
CS25104	281 C1 d21	carboplatin d21	281	OvC4		7.07568e+07	2.29554e+07	3.20421e+07	2.44455e+06	2.15783e+06	3.46369e+06	6.07333e+07	4.97916e+07	3.38738e+07	2.71515e+07	7.21021e+07	9.31233e+07	3.45688e+06	235654	1.71309e+08	8.41887e+06	989281	2.70906e+07	2.1789e+06	5.03835e+06	823598	1.60218e+07	176644	1.31559e+06	4.20524e+07	507619	122329	1.68044e+07	1.19143e+06	3.05906e+06	2.24772e+06	1.18036e+08	118717	14354.8	4.41902e+06	2.88881e+06	3.89811e+06	1.17808e+08	1.96424e+08	1.53121e+07	3.49945e+07	1.16592e+06	4.18837e+06	439210
CS25105	281 C2 d21	carboplatin d21	281	OvC4		7.0212e+07	2.22504e+07	3.09987e+07	2.24735e+06	2.00736e+06	3.95144e+06	6.07168e+07	5.38955e+07	3.42435e+07	2.71054e+07	7.00041e+07	9.36288e+07	3.30835e+06	219161	1.70773e+08	7.84971e+06	857810	2.55064e+07	2.05876e+06	5.05424e+06	747814	1.13052e+07	177793	723492	4.30374e+07	568106	130217	1.58922e+07	1.23195e+06	2.85669e+06	1.90675e+06	1.11952e+08	115400	8635.84	4.10218e+06	2.93274e+06	3.44136e+06	1.10662e+08	2.21737e+08	1.4869e+07	3.65961e+07	1.07693e+06	4.27863e+06	476718
CS25106	281 D1 d14	paclitaxel d14	281	OvC4		7.50431e+07	2.39838e+07	3.30276e+07	2.66576e+06	1.81555e+06	2.41482e+06	6.46747e+07	5.99451e+07	3.31212e+07	2.87223e+07	7.60578e+07	1.08193e+08	3.8854e+06	233605	1.47512e+08	8.77924e+06	1.04017e+06	2.9907e+07	2.6625e+06	5.83983e+06	902345	1.38157e+07	158665	2.80179e+06	4.19656e+07	551534	126435	1.71488e+07	824789	3.67054e+06	1.83852e+06	1.31691e+08	125666	49891.1	4.16446e+06	3.32848e+06	3.8872e+06	1.0527e+08	2.05626e+08	1.58373e+07	3.31897e+07	976055	4.12558e+06	467967
CS25107	281 D2 d14	paclitaxel d14	281	OvC4		7.37052e+07	2.30901e+07	3.17373e+07	2.61411e+06	2.05092e+06	2.29789e+06	6.38226e+07	5.28236e+07	3.25815e+07	2.60658e+07	7.27721e+07	9.19172e+07	3.75514e+06	281991	1.63304e+08	8.33185e+06	976632	2.98556e+07	2.50545e+06	5.48447e+06	853620	1.35633e+07	170858	1.09672e+06	4.66332e+07	569179	131442	1.66733e+07	267093	3.17949e+06	2.6211e+06	1.25015e+08	127375	32735.6	4.06982e+06	3.09651e+06	4.13649e+06	1.13885e+08	2.26687e+08	1.50562e+07	2.69336e+07	1.01095e+06	4.37539e+06	483252
CS25108	281 D1 d21	paclitaxel d21	281	OvC4		6.9689e+07	2.28884e+07	3.01753e+07	2.22895e+06	1.93035e+06	3.66975e+06	5.99526e+07	4.7798e+07	3.3196e+07	2.55711e+07	7.13381e+07	9.51074e+07	3.43818e+06	211682	1.55354e+08	8.36326e+06	898104	2.69208e+07	2.04022e+06	4.86885e+06	851782	1.68824e+07	152936	1.19442e+06	4.32526e+07	518734	120392	1.65371e+07	834693	2.93842e+06	2.47513e+06	1.15605e+08	112755	29510.7	3.4915e+06	2.75391e+06	3.60881e+06	1.23537e+08	2.10854e+08	1.50504e+07	3.55338e+07	1.03736e+06	4.28557e+06	427560
CS25109	281 D2 d21	paclitaxel d21	281	OvC4		6.70523e+07	2.1994e+07	3.11535e+07	2.07264e+06	2.11768e+06	3.60861e+06	5.74201e+07	5.12701e+07	3.50786e+07	2.61437e+07	6.35745e+07	8.90295e+07	3.28042e+06	197035	1.58818e+08	8.3291e+06	846140	2.82805e+07	2.17386e+06	4.99886e+06	670119	1.75451e+07	206516	904903	4.12375e+07	506505	119413	1.59018e+07	247964	2.80839e+06	2.19716e+06	1.11557e+08	114221	29828.6	3.25927e+06	2.81233e+06	3.70143e+06	1.27966e+08	2.2575e+08	1.56233e+07	3.66702e+07	1.05091e+06	4.20646e+06	431147
CS25110	281 E1 d14	carboplatin + paclitaxel d14	281	OvC4		7.16053e+07	2.28985e+07	3.23412e+07	2.35461e+06	1.77589e+06	2.72656e+06	6.06483e+07	5.84803e+07	3.33137e+07	2.58995e+07	7.59883e+07	9.78848e+07	3.32744e+06	254021	1.69673e+08	8.63511e+06	943848	2.82422e+07	2.32129e+06	5.27033e+06	833030	1.56419e+07	148745	839776	4.24936e+07	519092	119179	1.81561e+07	1.03014e+06	2.54516e+06	2.23229e+06	1.20687e+08	121694	10107.4	3.64366e+06	3.02748e+06	3.78237e+06	1.28403e+08	2.16525e+08	1.41947e+07	3.16784e+07	910712	4.04521e+06	465233
CS25111	281 E2 d14	carboplatin + paclitaxel d14	281	OvC4		6.92645e+07	2.19666e+07	3.14294e+07	2.47405e+06	1.99383e+06	2.53168e+06	5.97485e+07	4.8415e+07	3.37475e+07	2.65177e+07	7.34548e+07	9.46698e+07	3.12937e+06	214646	1.56384e+08	8.00846e+06	920290	2.74214e+07	2.2851e+06	5.03517e+06	840793	1.55597e+07	233612	1.72356e+06	4.38232e+07	501350	116722	1.59662e+07	1.39473e+06	2.83867e+06	2.19039e+06	1.13075e+08	118121	15176.1	3.51616e+06	2.89836e+06	3.25496e+06	7.60881e+07	2.29673e+08	1.65796e+07	3.45671e+07	1.02304e+06	4.11316e+06	411256
CS25112	281 E1 d21	carboplatin + paclitaxel d21	281	OvC4		6.90159e+07	2.23892e+07	3.04151e+07	2.43691e+06	1.62238e+06	3.82071e+06	5.95741e+07	4.81989e+07	3.26596e+07	2.57701e+07	6.69236e+07	9.2918e+07	3.20378e+06	223323	1.73119e+08	7.96803e+06	930410	2.79755e+07	2.04365e+06	5.05826e+06	715706	1.30329e+07	167954	1.12869e+06	4.21226e+07	485844	115138	1.59562e+07	1.39646e+06	3.17055e+06	2.27065e+06	1.14589e+08	115744	8271.17	3.52453e+06	2.84893e+06	3.65408e+06	1.20918e+08	2.1813e+08	1.48157e+07	3.02824e+07	897173	4.35342e+06	415870
CS25113	281 E2 d21	carboplatin + paclitaxel d21	281	OvC4		6.15475e+07	1.95849e+07	2.87773e+07	2.17773e+06	1.82901e+06	3.36663e+06	5.3051e+07	4.60929e+07	3.34705e+07	2.28179e+07	6.53848e+07	8.43556e+07	2.64981e+06	166521	1.64533e+08	7.2144e+06	803874	2.51852e+07	1.87328e+06	4.3511e+06	608986	1.98759e+07	189692	2.90344e+06	4.18315e+07	525513	128555	1.33881e+07	1.80733e+06	2.7444e+06	1.999e+06	9.74741e+07	105589	13678.8	2.93214e+06	2.44332e+06	3.11981e+06	1.16595e+08	2.24568e+08	1.54537e+07	3.77162e+07	847933	4.28413e+06	434832
CS25114	282 B1 d14	untreated d14	282	OvC2		7.7189e+07	2.56943e+07	3.2864e+07	2.91711e+06	1.9609e+06	1.13873e+06	6.55099e+07	5.91166e+07	3.26207e+07	3.0311e+07	8.31939e+07	1.12131e+08	3.95301e+06	282736	1.1774e+08	9.83035e+06	1.12955e+06	3.03314e+07	2.60987e+06	6.19861e+06	1.02616e+06	1.23409e+07	175899	5.46208e+06	4.49471e+07	516788	117129	1.99451e+07	462405	3.29306e+06	2.79292e+06	1.41735e+08	142177	131666	4.85414e+06	3.47824e+06	4.36662e+06	1.09425e+08	2.11844e+08	1.73924e+07	2.92925e+07	1.21131e+06	4.00994e+06	454140
CS25115	282 B2 d14	untreated d14	282	OvC2		6.67494e+07	2.17856e+07	2.99058e+07	2.45913e+06	2.09646e+06	907973	5.72272e+07	5.1574e+07	3.49325e+07	2.48741e+07	7.24216e+07	9.62617e+07	3.50032e+06	198608	1.51344e+08	8.04946e+06	958913	2.63064e+07	2.1595e+06	5.03382e+06	819399	1.51163e+07	155621	7.39972e+06	4.49398e+07	580288	135913	1.62035e+07	594910	2.94752e+06	2.36401e+06	1.20952e+08	117831	35465.7	3.9465e+06	2.88714e+06	3.57747e+06	1.10639e+08	2.27341e+08	1.66584e+07	3.43699e+07	1.03821e+06	4.47998e+06	420934
CS25116	282 B1 d21	untreated d21	282	OvC2		7.17884e+07	2.41092e+07	3.2445e+07	2.57517e+06	1.84988e+06	3.87658e+06	6.12475e+07	5.31414e+07	3.30037e+07	2.82784e+07	7.67197e+07	9.92604e+07	3.69686e+06	230753	1.33422e+08	8.88333e+06	1.0325e+06	2.68639e+07	2.36209e+06	5.69284e+06	1.00697e+06	1.45772e+07	159887	1.72862e+06	4.27294e+07	530570	126217	1.80267e+07	367996	3.04428e+06	2.49686e+06	1.34065e+08	124319	96611	4.41419e+06	3.15095e+06	3.72042e+06	1.09533e+08	2.07039e+08	1.65641e+07	2.4551e+07	1.01352e+06	4.41327e+06	446110
CS25117	282 B2 d21	untreated d21	282	OvC2		7.12284e+07	2.21438e+07	3.08136e+07	2.53857e+06	1.73375e+06	3.66353e+06	6.12123e+07	5.30828e+07	3.30578e+07	2.68133e+07	7.58461e+07	9.69869e+07	3.50315e+06	227648	1.68799e+08	8.42555e+06	1.01205e+06	2.47175e+07	2.16387e+06	5.27394e+06	809739	1.4318e+07	133810	3.65941e+06	4.47262e+07	500141	114640	1.66735e+07	654041	2.2888e+06	2.24279e+06	1.19166e+08	117271	129352	4.4421e+06	3.10765e+06	3.72457e+06	1.11486e+08	2.13916e+08	1.58553e+07	2.91598e+07	1.01574e+06	4.1197e+06	437325
CS25118	282 C1 d14	carboplatin d14	282	OvC2		1.0136e+08	2.52212e+07	3.43697e+07	2.6919e+06	1.81714e+06	2.2748e+06	9.06003e+07	5.32524e+07	3.40425e+07	2.8573e+07	8.29834e+07	1.05733e+08	3.5701e+06	261816	1.93922e+08	8.97743e+06	1.07643e+06	2.66052e+07	2.29654e+06	5.55441e+06	885358	1.37662e+07	159964	3.57752e+06	4.60686e+07	501660	114640	1.88362e+07	835864	3.11249e+06	2.72435e+06	1.32075e+08	131652	7845.86	4.39707e+06	3.1027e+06	3.64354e+06	1.18657e+08	2.24115e+08	1.66137e+07	2.9002e+07	1.18373e+06	4.34879e+06	461900
CS25119	282 C2 d14	carboplatin d14	282	OvC2		9.09483e+07	2.33271e+07	3.30767e+07	2.23899e+06	2.0146e+06	2.17997e+06	8.09069e+07	5.06357e+07	3.36177e+07	2.8622e+07	7.1488e+07	9.85246e+07	3.50064e+06	227409	1.58025e+08	8.46819e+06	938724	2.61583e+07	2.15708e+06	5.19493e+06	810635	1.5378e+07	196594	2.35986e+06	4.56396e+07	575199	131389	1.6691e+07	1.01132e+06	2.8938e+06	2.31637e+06	1.20647e+08	119556	21533.4	3.89428e+06	2.8947e+06	3.18411e+06	1.23163e+08	2.27495e+08	1.66629e+07	3.07576e+07	879655	4.39838e+06	511816
CS25120	282 C1 d21	carboplatin d21	282	OvC2		7.45208e+07	2.45033e+07	3.43061e+07	2.65384e+06	1.87374e+06	4.06388e+06	6.3673e+07	5.57999e+07	3.30657e+07	3.08553e+07	7.99048e+07	1.15306e+08	3.7426e+06	238357	2.02298e+08	9.01208e+06	1.1102e+06	2.7803e+07	2.70519e+06	5.87513e+06	923908	1.53906e+07	168171	2.14228e+06	4.01918e+07	514262	116604	1.96717e+07	797395	3.16076e+06	2.52463e+06	1.32068e+08	130837	8221.44	4.67914e+06	3.22829e+06	3.85433e+06	1.08151e+08	2.09657e+08	1.60144e+07	2.44969e+07	1.02815e+06	4.21909e+06	428804
CS25121	282 C2 d21	carboplatin d21	282	OvC2		6.58882e+07	2.14863e+07	3.16023e+07	2.44328e+06	1.86434e+06	3.5802e+06	5.66596e+07	4.98875e+07	3.49632e+07	2.55847e+07	6.74138e+07	9.29999e+07	2.88542e+06	204510	1.59695e+08	7.73005e+06	944271	2.62999e+07	2.0484e+06	4.95703e+06	776414	1.01034e+07	188388	949483	4.5324e+07	499184	115751	1.56578e+07	1.1491e+06	2.82244e+06	2.04061e+06	1.10292e+08	110850	21326.7	3.9223e+06	2.83263e+06	3.32896e+06	1.15008e+08	2.32358e+08	1.46396e+07	3.4146e+07	1.24404e+06	4.29168e+06	441823
CS25122	282 D1 d14	paclitaxel d14	282	OvC2		9.01068e+07	2.38739e+07	3.1058e+07	2.58815e+06	1.69401e+06	2.14603e+06	8.00387e+07	4.90771e+07	3.45487e+07	2.81008e+07	7.11276e+07	9.77465e+07	3.4126e+06	219116	1.64326e+08	8.38484e+06	996960	2.4751e+07	2.30726e+06	5.2209e+06	894468	1.59343e+07	184668	3.20522e+06	4.27908e+07	523275	121214	1.72494e+07	339450	3.11818e+06	2.3867e+06	1.25087e+08	120144	28756	3.67463e+06	2.93623e+06	3.45178e+06	1.21043e+08	2.21949e+08	1.70038e+07	3.12465e+07	964491	4.27851e+06	454523
CS25123	282 D2 d14	paclitaxel d14	282	OvC2		7.75393e+07	2.53384e+07	3.30218e+07	3.09464e+06	1.95077e+06	2.34366e+06	6.66104e+07	5.4391e+07	3.47676e+07	2.95896e+07	7.65941e+07	1.06573e+08	3.95202e+06	236630	1.66935e+08	9.11423e+06	1.00719e+06	2.6325e+07	2.49058e+06	5.69084e+06	925425	1.56444e+07	174252	3.54869e+06	4.12517e+07	547256	130708	1.91878e+07	247793	3.36736e+06	2.7029e+06	1.3554e+08	127152	297027	4.20144e+06	3.26934e+06	3.65115e+06	1.15468e+08	2.22536e+08	1.7491e+07	3.05982e+07	1.01444e+06	3.93918e+06	450561
CS25124	282 D1 d21	paclitaxel d21	282	OvC2		6.97437e+07	2.26198e+07	2.97431e+07	2.26433e+06	1.75185e+06	3.67923e+06	5.99232e+07	4.91626e+07	3.34486e+07	2.57961e+07	7.14402e+07	9.1749e+07	3.28857e+06	224711	1.84894e+08	8.23665e+06	928463	2.46176e+07	2.02171e+06	5.14677e+06	845185	1.59493e+07	151417	1.74667e+06	4.5507e+07	523845	119392	1.65785e+07	262861	2.54996e+06	2.80288e+06	1.20643e+08	116559	27972.6	3.1635e+06	2.85189e+06	3.20526e+06	1.17198e+08	2.30936e+08	1.45937e+07	2.91867e+07	935250	4.04467e+06	456356
CS25125	282 D2 d21	paclitaxel d21	282	OvC2		6.97475e+07	2.28098e+07	3.04766e+07	2.43857e+06	1.60996e+06	3.86357e+06	5.95476e+07	5.31249e+07	3.3111e+07	2.7573e+07	7.44412e+07	9.38965e+07	3.40958e+06	213613	1.65187e+08	8.52773e+06	1.01198e+06	2.59856e+07	2.26861e+06	5.21719e+06	839269	1.68209e+07	161407	1.70842e+06	4.47441e+07	506421	116954	1.7103e+07	63904.3	2.77071e+06	2.48065e+06	1.20892e+08	132806	497627	3.64744e+06	2.95533e+06	3.12917e+06	1.09896e+08	2.13986e+08	1.56385e+07	2.7141e+07	1.1443e+06	4.13573e+06	437068
CS25126	282 E1 d14	carboplatin + paclitaxel d14	282	OvC2		7.95407e+07	2.5533e+07	3.39801e+07	2.64726e+06	2.03753e+06	2.56209e+06	6.8178e+07	5.43826e+07	3.64246e+07	3.00108e+07	8.11861e+07	1.09021e+08	3.85328e+06	252105	1.87971e+08	9.39738e+06	1.0054e+06	2.74845e+07	2.50995e+06	5.83902e+06	885483	1.5465e+07	151587	1.72067e+06	4.24443e+07	520380	118956	1.9751e+07	817136	3.21217e+06	3.01634e+06	1.36616e+08	127113	14153.3	3.64558e+06	3.31312e+06	3.41298e+06	1.15068e+08	2.08914e+08	1.72947e+07	2.935e+07	1.05131e+06	4.1914e+06	387650
CS25127	282 E2 d14	carboplatin + paclitaxel d14	282	OvC2		6.48767e+07	2.12608e+07	3.15545e+07	2.53599e+06	2.01577e+06	2.00199e+06	5.54791e+07	4.64027e+07	3.35253e+07	2.48959e+07	6.85448e+07	9.02604e+07	3.28956e+06	194778	1.42496e+08	7.86019e+06	849328	2.4723e+07	2.05264e+06	4.80729e+06	820787	1.65246e+07	151270	3.41391e+06	4.95496e+07	548180	124690	1.49819e+07	998978	2.59568e+06	2.2215e+06	1.11068e+08	111723	8359.47	3.37903e+06	2.77204e+06	3.09513e+06	1.13905e+08	2.3534e+08	1.49323e+07	3.01502e+07	1.13748e+06	4.66548e+06	443555
CS25128	282 E1 d21	carboplatin + paclitaxel d21	282	OvC2		7.09151e+07	2.46446e+07	3.22524e+07	2.86791e+06	2.20483e+06	4.58509e+06	6.0473e+07	5.34434e+07	3.23455e+07	2.87462e+07	8.22318e+07	1.05213e+08	3.81334e+06	242339	2.17159e+08	8.7405e+06	1.15284e+06	2.5746e+07	2.33981e+06	5.78611e+06	917527	1.06425e+07	177134	1.68332e+06	4.89578e+07	496245	112749	1.8449e+07	1.27468e+06	2.93504e+06	2.94936e+06	1.28498e+08	129408	8255.63	3.76584e+06	3.29955e+06	3.78281e+06	1.09129e+08	2.19658e+08	1.67124e+07	2.45659e+07	1.33864e+06	4.49389e+06	412535
CS25129	282 E2 d21	carboplatin + paclitaxel d21	282	OvC2		6.52335e+07	2.12072e+07	3.09314e+07	2.44094e+06	1.87684e+06	3.26573e+06	5.50761e+07	4.91187e+07	3.31583e+07	2.41026e+07	6.74751e+07	8.74935e+07	2.9122e+06	178363	1.68841e+08	7.60354e+06	813732	2.5019e+07	1.90439e+06	4.31188e+06	789161	1.23865e+07	172051	4.40858e+06	4.48473e+07	517714	117908	1.59545e+07	1.09967e+06	2.60033e+06	1.96943e+06	1.06621e+08	103931	8059.84	3.02189e+06	2.48545e+06	2.98455e+06	1.18001e+08	2.28358e+08	1.65288e+07	3.13907e+07	899953	4.77637e+06	402836
CS25130	283 B1 d14	untreated d14	283	OvC3		6.86857e+07	2.20518e+07	3.0874e+07	2.3124e+06	1.99162e+06	3.45408e+06	5.91103e+07	5.07487e+07	3.32192e+07	2.61614e+07	7.10024e+07	9.0707e+07	3.37708e+06	239407	1.32726e+08	8.14248e+06	1.02251e+06	2.85384e+07	2.13987e+06	4.94251e+06	825889	1.57055e+07	175908	3.44543e+06	4.43108e+07	495969	115677	1.57003e+07	565483	2.92947e+06	2.46271e+06	1.19983e+08	112539	172050	3.5716e+06	2.7098e+06	3.56182e+06	1.21806e+08	2.20424e+08	1.80341e+07	3.66354e+07	1.15427e+06	4.59065e+06	444797
CS25131	283 B2 d14	untreated d14	283	OvC3		6.94493e+07	2.16063e+07	3.19442e+07	2.23199e+06	2.03705e+06	3.46349e+06	6.02143e+07	4.5441e+07	3.38093e+07	2.49936e+07	6.61979e+07	8.61203e+07	2.94338e+06	209822	1.26827e+08	7.68031e+06	854596	2.80927e+07	2.01185e+06	4.95382e+06	653996	1.35786e+07	206961	2.78416e+06	4.30683e+07	562487	128886	1.5472e+07	698755	2.28347e+06	2.40479e+06	1.13058e+08	108269	135790	3.66847e+06	2.84525e+06	3.18855e+06	7.44612e+07	2.25527e+08	1.48566e+07	3.65264e+07	870757	4.37721e+06	426963
CS25132	283 B1 d21	untreated d21	283	OvC3		7.09338e+07	2.29638e+07	3.1486e+07	2.48564e+06	2.16045e+06	2.40809e+06	6.12164e+07	4.66438e+07	3.21507e+07	2.61386e+07	7.82497e+07	1.02787e+08	3.67574e+06	246234	1.83388e+08	8.24649e+06	1.02006e+06	2.91076e+07	2.362e+06	5.45925e+06	862852	1.68208e+07	194466	2.87978e+06	4.30475e+07	531676	131857	1.67452e+07	771404	3.61369e+06	2.39726e+06	1.27557e+08	124730	168661	4.87088e+06	3.05642e+06	3.85158e+06	1.27154e+08	2.15582e+08	1.63948e+07	2.8235e+07	1.19165e+06	4.65258e+06	406972
CS25133	283 B2 d21	untreated d21	283	OvC3		7.00312e+07	2.23043e+07	3.09268e+07	2.29626e+06	2.31928e+06	2.23179e+06	5.99186e+07	4.14489e+07	3.34376e+07	2.53675e+07	6.72632e+07	8.85937e+07	3.38216e+06	257221	1.35813e+08	8.56809e+06	947479	2.86627e+07	2.15272e+06	5.23992e+06	757967	1.63485e+07	215321	2.93744e+06	4.4867e+07	530504	121751	1.65448e+07	258846	3.06379e+06	2.48735e+06	1.17299e+08	121073	192590	4.75609e+06	2.92336e+06	3.5022e+06	1.2689e+08	2.28904e+08	1.56886e+07	3.462e+07	1.12436e+06	4.31088e+06	438866
CS25134	283 C1 d14	carboplatin d14	283	OvC3		7.07301e+07	2.30299e+07	3.22846e+07	2.43354e+06	2.00432e+06	4.0653e+06	6.09414e+07	5.24531e+07	3.39956e+07	2.75595e+07	7.29807e+07	1.02071e+08	3.43102e+06	268242	1.66408e+08	8.41306e+06	930868	2.98065e+07	2.23353e+06	5.39305e+06	799717	1.49523e+07	156020	1.16561e+06	4.3158e+07	469666	108863	1.62993e+07	997155	3.19933e+06	2.32935e+06	1.22782e+08	122452	31620.6	3.87359e+06	3.07613e+06	3.87771e+06	1.30177e+08	2.26158e+08	1.57508e+07	3.22994e+07	1.16504e+06	4.5538e+06	397114
CS25135	283 C2 d14	carboplatin d14	283	OvC3		6.65957e+07	2.10613e+07	3.0245e+07	2.34075e+06	1.84147e+06	3.54644e+06	5.73428e+07	4.8336e+07	3.52465e+07	2.59537e+07	7.04811e+07	9.38321e+07	3.22649e+06	210107	1.56098e+08	7.98899e+06	926584	2.59655e+07	1.99482e+06	5.08419e+06	788477	1.72024e+07	180970	1.35173e+06	4.47904e+07	483679	111053	1.56329e+07	1.13074e+06	2.55061e+06	2.38629e+06	1.12362e+08	117274	60511.3	3.88604e+06	2.83953e+06	3.54278e+06	8.72874e+07	2.24175e+08	1.47974e+07	3.4705e+07	951354	3.94961e+06	417952
CS25136	283 C1 d21	carboplatin d21	283	OvC3		9.52654e+07	2.38118e+07	3.16741e+07	2.60542e+06	1.88195e+06	2.85433e+06	8.52806e+07	4.84428e+07	3.25706e+07	2.69455e+07	8.05601e+07	1.03648e+08	3.87191e+06	250064	2.04015e+08	8.59098e+06	989626	2.99107e+07	2.57122e+06	5.70869e+06	869768	1.77027e+07	141300	874259	4.38308e+07	511269	117345	1.74611e+07	1.49071e+06	2.71985e+06	2.73925e+06	1.30632e+08	128601	12007.6	4.41915e+06	3.20941e+06	4.11275e+06	1.264e+08	2.21145e+08	1.77788e+07	3.05657e+07	1.06052e+06	4.26281e+06	439572
CS25137	283 C2 d21	carboplatin d21	283	OvC3		9.95873e+07	2.45306e+07	3.27889e+07	2.68106e+06	1.40776e+06	2.76733e+06	8.92297e+07	4.58351e+07	3.34213e+07	2.8489e+07	8.30912e+07	1.04831e+08	3.73393e+06	243870	2.01759e+08	8.69221e+06	1.08797e+06	2.78549e+07	2.48268e+06	6.06276e+06	870876	1.10093e+07	163720	1.04921e+06	4.48981e+07	545384	129768	1.778e+07	798126	3.248e+06	1.99688e+06	1.33502e+08	123894	8266.54	5.6059e+06	3.41029e+06	4.24788e+06	7.61385e+07	2.17431e+08	1.63792e+07	3.18814e+07	1.36966e+06	4.0935e+06	454356
CS25138	283 D1 d14	paclitaxel d14	283	OvC3		9.44798e+07	2.39941e+07	3.19652e+07	2.69583e+06	1.81904e+06	4.14666e+06	8.44731e+07	5.01631e+07	3.38421e+07	2.88461e+07	7.56839e+07	1.00666e+08	3.60883e+06	270216	9.93067e+07	8.52319e+06	1.05144e+06	2.87943e+07	2.29694e+06	5.29584e+06	849789	1.46604e+07	319312	1.40541e+06	4.3169e+07	509971	117030	1.7376e+07	45512.7	3.32142e+06	2.18506e+06	1.27843e+08	123309	256915	3.67346e+06	2.96563e+06	3.50629e+06	1.19314e+08	2.12134e+08	1.52157e+07	2.96093e+07	949924	4.18355e+06	448634
CS25139	283 D2 d14	paclitaxel d14	283	OvC3		7.41225e+07	2.36162e+07	3.23708e+07	2.44609e+06	1.99748e+06	4.29766e+06	6.38631e+07	5.21437e+07	3.38624e+07	2.87327e+07	7.79989e+07	9.66013e+07	3.47712e+06	228197	9.25786e+07	8.81455e+06	1.03735e+06	2.8721e+07	2.38131e+06	5.46293e+06	843236	1.44006e+07	271016	1.6648e+06	4.14613e+07	463856	108971	1.71666e+07	51328.5	3.29244e+06	2.49671e+06	1.22337e+08	119854	188403	3.7479e+06	3.10262e+06	3.67627e+06	1.15984e+08	2.34837e+08	1.52894e+07	3.7211e+07	1.18916e+06	3.91356e+06	383899
CS25140	283 D1 d21	paclitaxel d21	283	OvC3		8.38206e+07	2.56239e+07	3.21639e+07	2.75321e+06	1.88206e+06	3.01407e+06	7.17515e+07	5.3357e+07	3.43724e+07	3.10097e+07	8.99228e+07	1.14179e+08	4.22137e+06	291874	1.47822e+08	1.03281e+07	1.18125e+06	2.87796e+07	2.85332e+06	6.29467e+06	1.04788e+06	1.54063e+07	237894	1.65676e+06	4.30835e+07	450839	103517	2.22302e+07	80149.9	3.45174e+06	2.7695e+06	1.48525e+08	139587	140164	5.64272e+06	3.57422e+06	4.5511e+06	1.22703e+08	1.82447e+08	1.73281e+07	3.24372e+07	1.30067e+06	3.94628e+06	414367
CS25141	283 D2 d21	paclitaxel d21	283	OvC3		7.83213e+07	2.46692e+07	3.43568e+07	2.42854e+06	1.75538e+06	2.63952e+06	6.7234e+07	4.64229e+07	3.32813e+07	2.86076e+07	8.24705e+07	1.05381e+08	3.73937e+06	280265	1.41706e+08	9.17176e+06	1.13394e+06	2.71158e+07	2.62865e+06	5.86584e+06	867121	1.42375e+07	171845	1.9258e+06	4.02006e+07	499997	125914	1.92992e+07	112633	2.90417e+06	2.53823e+06	1.38481e+08	129461	61430.3	5.1427e+06	3.2956e+06	4.06997e+06	1.09674e+08	2.13839e+08	1.39061e+07	3.23472e+07	1.33778e+06	4.29723e+06	378326
CS25142	283 E1 d14	carboplatin + paclitaxel d14	283	OvC3		7.30933e+07	2.36413e+07	3.2315e+07	2.39176e+06	1.66984e+06	4.34646e+06	6.28397e+07	5.72921e+07	3.36721e+07	2.61234e+07	7.8951e+07	9.90757e+07	3.74994e+06	265901	1.62641e+08	8.84144e+06	1.05817e+06	2.7704e+07	2.2469e+06	5.53989e+06	815006	9.74756e+06	210119	1.0157e+06	4.90743e+07	458768	105511	1.72314e+07	753572	2.45179e+06	2.63607e+06	1.24858e+08	120612	27123.9	4.11018e+06	3.17825e+06	3.85224e+06	1.3136e+08	2.1717e+08	1.68735e+07	3.30624e+07	1.16852e+06	4.54995e+06	409686
CS25143	283 E2 d14	carboplatin + paclitaxel d14	283	OvC3		6.88602e+07	2.19709e+07	3.03725e+07	2.39492e+06	1.71682e+06	4.2901e+06	5.91763e+07	5.09225e+07	3.27387e+07	2.44438e+07	6.76046e+07	8.857e+07	3.2005e+06	241802	1.50552e+08	8.3391e+06	914561	2.62529e+07	2.17452e+06	5.12785e+06	762669	1.65096e+07	164896	1.26319e+06	4.72064e+07	509026	116860	1.5948e+07	1.20739e+06	2.75558e+06	2.29472e+06	1.12793e+08	114777	28496.2	3.72162e+06	2.8254e+06	3.68679e+06	1.30883e+08	2.2414e+08	1.66709e+07	3.44865e+07	902103	3.94394e+06	470537
CS25144	283 E1 d21	carboplatin + paclitaxel d21	283	OvC3		8.51574e+07	2.68055e+07	3.39868e+07	3.26049e+06	1.9418e+06	3.10564e+06	7.34827e+07	5.83286e+07	3.32885e+07	2.97619e+07	9.36066e+07	1.19083e+08	4.1948e+06	307253	2.57992e+08	9.72521e+06	1.10733e+06	3.0628e+07	2.79679e+06	6.68114e+06	949376	1.61872e+07	133007	3.08584e+06	4.72391e+07	532189	123180	2.05471e+07	1.58132e+06	3.04725e+06	3.18857e+06	1.50016e+08	144124	19084.4	4.15723e+06	3.74908e+06	4.52504e+06	1.09058e+08	2.1832e+08	1.88107e+07	2.40608e+07	1.49275e+06	4.43793e+06	446512
CS25145	283 E2 d21	carboplatin + paclitaxel d21	283	OvC3		7.79844e+07	2.53726e+07	3.19565e+07	2.94835e+06	1.80046e+06	3.18115e+06	6.7162e+07	5.35682e+07	3.3599e+07	2.9845e+07	8.45507e+07	1.13186e+08	3.72577e+06	255154	2.36712e+08	9.23297e+06	1.01724e+06	3.05411e+07	2.52374e+06	5.92837e+06	863773	1.97184e+07	153235	4.49382e+06	4.21203e+07	525749	120729	1.95052e+07	1.85586e+06	3.33252e+06	2.71829e+06	1.34325e+08	124775	15176.6	1.97984e+06	3.39455e+06	4.51797e+06	1.26189e+08	2.05641e+08	1.50347e+07	2.89439e+07	1.35645e+06	3.92544e+06	467072
CS25146	287 B1 d14	untreated d14	287	OvC6		7.53204e+07	2.46204e+07	3.27416e+07	2.64246e+06	1.70471e+06	2.90917e+06	6.45563e+07	4.86957e+07	3.37994e+07	2.8888e+07	7.73006e+07	1.00996e+08	3.81381e+06	234149	9.69036e+07	9.03481e+06	1.16518e+06	2.53591e+07	2.45239e+06	5.75382e+06	892419	1.26006e+07	193322	690326	4.60759e+07	542677	123986	1.87315e+07	95822.6	3.05583e+06	2.58438e+06	1.32799e+08	125466	1.20193e+06	3.82318e+06	3.19638e+06	4.03996e+06	1.28663e+08	2.28561e+08	1.62278e+07	3.09238e+07	915565	4.49961e+06	439105
CS25147	287 B2 d14	untreated d14	287	OvC6		9.64726e+07	2.38908e+07	3.24406e+07	2.27075e+06	1.90635e+06	2.72662e+06	8.62142e+07	5.00534e+07	3.44056e+07	2.89549e+07	7.45457e+07	9.02645e+07	3.91394e+06	234376	8.60994e+07	8.65104e+06	1.09921e+06	3.04612e+07	2.28209e+06	5.64331e+06	913798	1.32037e+07	224869	382503	4.50761e+07	520521	119039	1.74395e+07	88673.2	2.30447e+06	2.48899e+06	1.35101e+08	122094	769435	3.72062e+06	3.20607e+06	3.8168e+06	1.21147e+08	2.34612e+08	1.7032e+07	3.62387e+07	885851	4.04103e+06	403190
CS25148	287 B1 d21	untreated d21	287	OvC6		7.90123e+07	2.6402e+07	3.37524e+07	2.50805e+06	1.89318e+06	2.83838e+06	6.77031e+07	5.40388e+07	3.52364e+07	3.05418e+07	8.10028e+07	9.96078e+07	3.70423e+06	259787	1.30611e+08	9.36102e+06	1.04735e+06	2.6584e+07	2.47058e+06	5.60166e+06	882300	1.45143e+07	214239	542625	4.57858e+07	523351	119405	1.99585e+07	107277	3.44384e+06	2.54066e+06	1.36787e+08	134179	1.09912e+06	3.46744e+06	3.2038e+06	4.29808e+06	1.21473e+08	2.21601e+08	1.643e+07	3.16658e+07	1.09637e+06	4.4556e+06	422020
CS25149	287 B2 d21	untreated d21	287	OvC6		9.84568e+07	2.50761e+07	3.29435e+07	2.46154e+06	2.09211e+06	2.93083e+06	8.73968e+07	5.12003e+07	3.42115e+07	2.96788e+07	7.75168e+07	1.0088e+08	3.63568e+06	263338	1.19073e+08	9.25062e+06	1.08462e+06	2.55571e+07	2.53517e+06	5.65317e+06	946258	1.41632e+07	180917	337559	4.5848e+07	530416	120864	1.91018e+07	132524	3.16054e+06	3.07502e+06	1.31024e+08	129232	816763	3.75668e+06	3.22361e+06	4.08453e+06	1.15479e+08	2.21647e+08	1.72613e+07	3.29951e+07	810530	4.63294e+06	426994
CS25150	287 C1 d14	carboplatin d14	287	OvC6		7.83378e+07	2.46826e+07	3.51302e+07	2.69463e+06	1.95072e+06	3.00198e+06	6.72909e+07	5.05591e+07	3.14152e+07	2.9572e+07	8.10636e+07	1.0427e+08	4.06949e+06	293148	1.5273e+08	9.23722e+06	1.08034e+06	2.60622e+07	2.63164e+06	5.76323e+06	877870	1.30291e+07	189585	262970	4.4266e+07	506376	119833	1.88773e+07	302141	2.78677e+06	2.89312e+06	1.36279e+08	130534	205702	4.71932e+06	3.38887e+06	4.12733e+06	1.13338e+08	2.13289e+08	1.72888e+07	3.13433e+07	795455	4.56728e+06	406431
CS25151	287 C2 d14	carboplatin d14	287	OvC6		6.82749e+07	2.28556e+07	3.14846e+07	2.2053e+06	1.86496e+06	3.09232e+06	5.86952e+07	4.42955e+07	3.42044e+07	2.53081e+07	7.10557e+07	8.65919e+07	3.4746e+06	224433	8.03187e+07	7.92719e+06	948810	2.44968e+07	2.38787e+06	5.27e+06	830272	1.24123e+07	178254	324692	4.59735e+07	526163	119870	1.58142e+07	349275	2.81795e+06	2.29211e+06	1.23821e+08	112274	351224	3.61336e+06	3.03404e+06	3.45999e+06	1.19619e+08	2.32029e+08	1.72543e+07	3.67751e+07	676246	4.44731e+06	414932
CS25152	287 C1 d21	carboplatin d21	287	OvC6		8.22958e+07	2.69361e+07	3.45536e+07	2.88129e+06	1.64928e+06	3.03445e+06	7.06053e+07	5.2391e+07	3.32146e+07	3.11558e+07	8.69963e+07	1.13499e+08	4.01568e+06	286403	1.99968e+08	9.82197e+06	1.16751e+06	2.76539e+07	2.73785e+06	6.06704e+06	974547	1.51262e+07	168456	396151	4.1532e+07	544364	124425	2.03969e+07	781447	3.46779e+06	2.49679e+06	1.49226e+08	133390	40042.3	4.17826e+06	3.46397e+06	4.08664e+06	1.15926e+08	2.29218e+08	1.53404e+07	2.75213e+07	888874	4.55713e+06	452398
CS25153	287 C2 d21	carboplatin d21	287	OvC6		6.94827e+07	2.2674e+07	3.1639e+07	2.32409e+06	2.04481e+06	2.61519e+06	5.98158e+07	4.36892e+07	3.48932e+07	2.62132e+07	7.31686e+07	9.33129e+07	3.23258e+06	200315	1.52555e+08	8.0898e+06	911326	2.27153e+07	2.23163e+06	5.34529e+06	728533	9.0914e+06	198691	1.04056e+06	4.19459e+07	593437	148686	1.58318e+07	791895	3.12484e+06	1.73747e+06	1.15353e+08	114071	91492.8	3.25979e+06	3.03418e+06	3.4765e+06	1.18601e+08	2.1296e+08	1.57224e+07	3.43521e+07	707596	3.99725e+06	491108
CS25154	287 D1 d14	paclitaxel d14	287	OvC6		6.51604e+07	2.06697e+07	3.13764e+07	2.35315e+06	1.82489e+06	2.60912e+06	5.55133e+07	4.53959e+07	3.19945e+07	2.42507e+07	7.13344e+07	9.04012e+07	3.3125e+06	196894	1.1455e+08	8.19771e+06	897700	2.33819e+07	2.15146e+06	4.93272e+06	745092	1.42104e+07	154478	526277	5.28779e+07	522127	121541	1.42605e+07	133081	2.90179e+06	1.82176e+06	1.1709e+08	109242	637628	3.33736e+06	2.75823e+06	3.32718e+06	1.11668e+08	2.21599e+08	1.69675e+07	2.69624e+07	684473	4.52271e+06	406437
CS25155	287 D2 d14	paclitaxel d14	287	OvC6		6.63699e+07	2.17028e+07	2.90029e+07	2.45007e+06	1.6344e+06	2.57774e+06	5.6463e+07	4.43298e+07	3.41375e+07	2.57503e+07	7.07682e+07	9.43589e+07	3.147e+06	192446	1.0059e+08	8.35283e+06	875871	2.36229e+07	2.1232e+06	5.0541e+06	777567	1.50111e+07	154039	483324	4.30685e+07	532891	127348	1.57844e+07	216487	2.92902e+06	2.18055e+06	1.13653e+08	109865	649387	3.30635e+06	2.86731e+06	3.59822e+06	1.15263e+08	2.11805e+08	1.59601e+07	3.14977e+07	1.01033e+06	4.23206e+06	437451
CS25156	287 D1 d21	paclitaxel d21	287	OvC6		6.91897e+07	2.20383e+07	2.92673e+07	2.43349e+06	1.8813e+06	2.52267e+06	5.9819e+07	4.61572e+07	3.45132e+07	2.4684e+07	7.46634e+07	9.4569e+07	3.2298e+06	225422	1.65186e+08	7.90774e+06	894277	2.31712e+07	2.22294e+06	5.11574e+06	724465	1.81813e+07	140437	685926	4.30281e+07	522048	123443	1.58222e+07	335704	2.16994e+06	2.70901e+06	1.14726e+08	114284	267932	2.99863e+06	2.86992e+06	3.37078e+06	1.10969e+08	2.13957e+08	1.61359e+07	3.06093e+07	786195	4.12469e+06	420949
CS25157	287 D2 d21	paclitaxel d21	287	OvC6		6.56964e+07	2.18699e+07	2.92976e+07	2.19854e+06	1.63622e+06	2.27484e+06	5.68204e+07	4.33927e+07	3.16519e+07	2.26244e+07	6.50647e+07	8.79403e+07	3.08878e+06	196787	1.42315e+08	7.49908e+06	862359	2.2784e+07	2.03925e+06	4.89134e+06	749459	1.02772e+07	134712	326719	4.83521e+07	482892	114781	1.48236e+07	283330	2.21772e+06	2.08588e+06	1.05212e+08	114521	436347	3.11041e+06	2.77617e+06	3.39804e+06	1.13619e+08	2.21662e+08	1.46045e+07	2.7158e+07	801283	4.24101e+06	419340
CS25158	287 E1 d14	carboplatin + paclitaxel d14	287	OvC6		6.83914e+07	2.19239e+07	3.17383e+07	2.17732e+06	1.78191e+06	2.86583e+06	5.87746e+07	4.42024e+07	3.45917e+07	2.67843e+07	6.26381e+07	8.53597e+07	3.0985e+06	207051	1.11717e+08	8.13373e+06	986497	2.48301e+07	2.11777e+06	4.97659e+06	831291	1.43667e+07	156909	316827	4.34268e+07	487877	116213	1.67358e+07	474601	2.885e+06	2.37502e+06	1.16344e+08	114703	175916	3.0265e+06	2.88312e+06	3.22426e+06	1.23056e+08	2.28761e+08	1.69147e+07	3.61235e+07	735912	3.93633e+06	428508
CS25159	287 E2 d14	carboplatin + paclitaxel d14	287	OvC6		6.50721e+07	2.14467e+07	2.86379e+07	2.09141e+06	1.43063e+06	3.0572e+06	5.5911e+07	4.18081e+07	3.35551e+07	2.44377e+07	6.30329e+07	8.00284e+07	2.97065e+06	198879	1.15343e+08	7.8025e+06	887315	3.76171e+07	1.90499e+06	4.71285e+06	766595	1.41177e+07	195932	318567	4.46797e+07	596703	144502	1.44937e+07	498496	2.66978e+06	2.18332e+06	1.07025e+08	108349	250524	2.94032e+06	2.62519e+06	2.98079e+06	1.11804e+08	2.18373e+08	1.49088e+07	3.65586e+07	633200	4.03733e+06	502248
CS25160	287 E1 d21	carboplatin + paclitaxel d21	287	OvC6		6.88548e+07	2.20415e+07	2.98965e+07	2.23781e+06	1.61296e+06	2.84718e+06	5.94865e+07	4.30675e+07	3.39047e+07	2.47537e+07	6.90734e+07	8.83073e+07	3.2632e+06	191623	1.51508e+08	7.74085e+06	891495	2.31008e+07	2.0791e+06	4.99048e+06	827102	1.10663e+07	146441	351579	4.87981e+07	509079	116435	1.55778e+07	732091	2.56136e+06	2.87315e+06	1.15622e+08	108622	159603	3.00102e+06	2.83859e+06	3.32339e+06	1.19543e+08	2.27355e+08	1.67708e+07	3.10227e+07	780063	3.37353e+06	435344
CS25161	287 E2 d21	carboplatin + paclitaxel d21	287	OvC6		6.43686e+07	2.07714e+07	2.7675e+07	2.0762e+06	1.81015e+06	2.89885e+06	5.5431e+07	4.38308e+07	3.35619e+07	2.29566e+07	6.39443e+07	8.20523e+07	3.11641e+06	174372	1.68094e+08	7.54156e+06	872658	2.40188e+07	1.86725e+06	4.69225e+06	710178	1.70256e+07	143189	310175	4.88418e+07	526351	123184	1.40845e+07	1.60188e+06	2.74413e+06	2.14393e+06	1.065e+08	106646	199521	2.6386e+06	2.70955e+06	3.11221e+06	1.21788e+08	2.40105e+08	1.4442e+07	2.59468e+07	710652	4.5682e+06	424403
CS25162	290 B1 d14	untreated d14	290	OvC7		7.30383e+07	2.43932e+07	3.40494e+07	2.33463e+06	1.89422e+06	2.94922e+06	6.24016e+07	4.98472e+07	3.31417e+07	2.92162e+07	7.43723e+07	9.52656e+07	3.79551e+06	261900	1.3236e+08	8.91504e+06	994270	2.67599e+07	2.47588e+06	5.87472e+06	1.07955e+06	1.44118e+07	200221	720756	4.41935e+07	484477	110644	1.8917e+07	300388	2.8713e+06	2.37763e+06	1.3306e+08	125376	261089	5.03238e+06	3.31983e+06	4.05751e+06	1.14703e+08	2.29991e+08	1.71883e+07	3.00756e+07	1.12239e+06	4.449e+06	427291
CS25163	290 B2 d14	untreated d14	290	OvC7		7.47982e+07	2.40307e+07	3.33729e+07	2.43892e+06	1.7745e+06	3.1682e+06	6.35674e+07	5.3015e+07	3.37321e+07	2.95461e+07	7.39839e+07	9.3956e+07	3.90288e+06	255714	1.05452e+08	9.47391e+06	1.09574e+06	2.88665e+07	2.42048e+06	5.90844e+06	885685	1.36976e+07	224577	790858	4.4266e+07	536100	122006	1.86497e+07	217962	3.32157e+06	2.73991e+06	1.37587e+08	129966	443531	5.37579e+06	3.33074e+06	3.97444e+06	1.13153e+08	2.24325e+08	1.78143e+07	3.21942e+07	1.11572e+06	4.11729e+06	456166
CS25164	290 B1 d21	untreated d21	290	OvC7		7.43125e+07	2.39693e+07	3.23383e+07	2.4036e+06	1.73337e+06	3.05707e+06	6.40364e+07	5.38151e+07	3.23861e+07	2.85148e+07	7.65323e+07	9.63626e+07	3.8235e+06	265914	1.48141e+08	8.6394e+06	1.09622e+06	2.8075e+07	2.50664e+06	5.58266e+06	948287	1.42756e+07	156763	797043	4.43978e+07	529588	122031	1.80502e+07	313969	2.83752e+06	2.60179e+06	1.2865e+08	121499	139437	5.07493e+06	3.11848e+06	4.24413e+06	1.12726e+08	2.22992e+08	1.651e+07	3.07595e+07	1.12777e+06	4.14536e+06	471831
CS25165	290 B2 d21	untreated d21	290	OvC7		8.18647e+07	2.09088e+07	2.986e+07	2.29157e+06	2.11616e+06	2.5097e+06	7.2268e+07	4.71746e+07	3.29529e+07	2.50943e+07	6.4533e+07	8.90918e+07	3.375e+06	229558	1.17421e+08	7.98128e+06	876307	2.36351e+07	2.09443e+06	5.05442e+06	736257	1.47579e+07	168532	339654	4.30753e+07	560798	127337	1.51072e+07	231044	2.98478e+06	1.76173e+06	1.15321e+08	110445	392653	3.98448e+06	2.88972e+06	3.6865e+06	1.09816e+08	2.10733e+08	1.57053e+07	3.09251e+07	987113	4.42978e+06	438688
CS25166	290 C1 d14	carboplatin d14	290	OvC7		7.62946e+07	2.51342e+07	3.15956e+07	2.69857e+06	2.15504e+06	3.15674e+06	6.40283e+07	5.2769e+07	3.20963e+07	2.80683e+07	8.37513e+07	1.05179e+08	3.68425e+06	263206	1.7735e+08	9.34817e+06	1.13149e+06	2.81086e+07	2.61817e+06	5.90394e+06	995455	1.57565e+07	189191	364736	4.18085e+07	558439	126531	2.06679e+07	375886	3.20652e+06	2.99429e+06	1.37248e+08	126149	82338.6	5.51089e+06	3.4382e+06	4.29144e+06	1.11348e+08	2.13646e+08	1.59908e+07	2.67706e+07	957321	4.10007e+06	455668
CS25167	290 C2 d14	carboplatin d14	290	OvC7		7.48891e+07	2.43844e+07	3.18812e+07	2.5964e+06	1.87453e+06	2.97518e+06	6.41256e+07	4.8791e+07	3.2754e+07	2.86502e+07	8.30398e+07	9.76913e+07	3.76191e+06	240907	1.75442e+08	8.99951e+06	1.10693e+06	2.74096e+07	2.37922e+06	5.55525e+06	810555	1.48756e+07	170258	589088	4.22956e+07	480121	110720	1.88249e+07	363534	2.4321e+06	2.13307e+06	1.32217e+08	122651	46354.5	5.07365e+06	3.17707e+06	3.99034e+06	1.0827e+08	2.13346e+08	1.55815e+07	3.04669e+07	1.10765e+06	4.14127e+06	413349
CS25168	290 C1 d21	carboplatin d21	290	OvC7		7.9155e+07	2.58864e+07	3.33269e+07	2.85471e+06	1.91679e+06	2.91722e+06	6.767e+07	5.37571e+07	3.59042e+07	3.0119e+07	8.55038e+07	1.04807e+08	3.81855e+06	228976	1.99558e+08	9.46928e+06	1.16566e+06	2.71438e+07	2.52455e+06	6.12175e+06	964691	1.74223e+07	146001	327052	4.11209e+07	525243	119824	2.0269e+07	402623	3.54506e+06	2.64425e+06	1.37333e+08	127383	53763.1	5.03734e+06	3.5576e+06	4.37379e+06	1.18459e+08	2.2153e+08	1.67224e+07	2.68778e+07	1.45385e+06	4.18373e+06	420445
CS25169	290 C2 d21	carboplatin d21	290	OvC7		7.56484e+07	2.37562e+07	3.18516e+07	2.53558e+06	1.55909e+06	2.38703e+06	6.47257e+07	4.85468e+07	3.65486e+07	2.73796e+07	7.95807e+07	1.02229e+08	3.57775e+06	231883	1.9237e+08	9.18023e+06	1.01385e+06	2.43455e+07	2.18881e+06	5.41991e+06	906063	1.84643e+07	153864	680084	4.69914e+07	540030	123421	1.84756e+07	471338	2.81487e+06	2.61282e+06	1.23786e+08	123350	8136.03	4.61652e+06	3.09349e+06	4.05631e+06	1.22669e+08	2.25728e+08	1.58011e+07	3.17792e+07	1.16931e+06	4.21252e+06	497213
CS25170	290 D1 d14	paclitaxel d14	290	OvC7		6.99116e+07	2.32361e+07	3.39239e+07	2.99621e+06	1.80362e+06	3.07769e+06	5.9821e+07	4.77156e+07	3.26118e+07	2.62509e+07	7.81764e+07	1.02756e+08	3.3834e+06	212992	1.03277e+08	8.47039e+06	1.07267e+06	2.56821e+07	2.42334e+06	5.39578e+06	901495	1.39004e+07	214430	381959	4.7851e+07	528778	120409	1.74182e+07	118239	3.09079e+06	2.52158e+06	1.27881e+08	124047	679072	4.24456e+06	2.9647e+06	3.89134e+06	1.12937e+08	2.2275e+08	1.56651e+07	2.99132e+07	1.01751e+06	4.3996e+06	454028
CS25171	290 D2 d14	paclitaxel d14	290	OvC7		6.72624e+07	2.19271e+07	2.97926e+07	2.2797e+06	1.77351e+06	2.82153e+06	5.79204e+07	4.88027e+07	3.30566e+07	2.35892e+07	7.00373e+07	8.97379e+07	3.32348e+06	202837	1.16264e+08	7.90779e+06	901074	2.46595e+07	2.0216e+06	5.04704e+06	820214	1.47785e+07	144544	521362	4.7892e+07	554514	128164	1.52867e+07	184708	2.87326e+06	2.29235e+06	1.15793e+08	115252	111331	3.8003e+06	2.91986e+06	3.75388e+06	1.22806e+08	2.38864e+08	1.75457e+07	2.76003e+07	1.27206e+06	4.31388e+06	482161
CS25172	290 D1 d21	paclitaxel d21	290	OvC7		7.42146e+07	2.42998e+07	3.31302e+07	2.6338e+06	1.89302e+06	2.93873e+06	6.42656e+07	4.95435e+07	3.45602e+07	2.86844e+07	7.60972e+07	1.06151e+08	3.50563e+06	238781	1.51101e+08	8.17225e+06	978599	2.51279e+07	2.23605e+06	5.40336e+06	826350	1.82686e+07	172251	417026	4.55723e+07	595697	136114	1.80514e+07	182621	2.78179e+06	2.47597e+06	1.25635e+08	116803	709195	4.63945e+06	3.03792e+06	3.73163e+06	1.17959e+08	2.28177e+08	1.68e+07	3.24245e+07	987001	4.07448e+06	455761
CS25173	290 D2 d21	paclitaxel d21	290	OvC7		8.23822e+07	2.09569e+07	2.78654e+07	2.22856e+06	2.02172e+06	2.47792e+06	7.30643e+07	4.38713e+07	3.40821e+07	2.47875e+07	6.75042e+07	8.87542e+07	3.09817e+06	214271	1.39435e+08	7.74527e+06	846103	2.24021e+07	2.03958e+06	4.99125e+06	712468	1.77914e+07	163232	535152	4.3564e+07	555777	126327	1.51297e+07	255802	2.90103e+06	2.19095e+06	1.10652e+08	107904	62865.1	4.45449e+06	2.85821e+06	3.52436e+06	1.14205e+08	2.23176e+08	1.57542e+07	3.30928e+07	985085	4.46211e+06	473464
CS25174	290 E1 d14	carboplatin + paclitaxel d14	290	OvC7		7.28495e+07	2.41246e+07	3.16681e+07	2.70334e+06	1.91779e+06	3.32717e+06	6.20206e+07	5.11016e+07	3.21808e+07	2.6652e+07	7.91549e+07	1.03331e+08	3.62908e+06	305233	1.74896e+08	8.95445e+06	1.01144e+06	2.54259e+07	2.44324e+06	5.65232e+06	949243	1.4867e+07	162398	461190	4.51241e+07	544848	126191	1.82741e+07	638381	3.23984e+06	2.49202e+06	1.32013e+08	124278	234883	4.72165e+06	3.22272e+06	4.1248e+06	1.09897e+08	2.26789e+08	1.58259e+07	2.67101e+07	990573	3.86107e+06	463173
CS25175	290 E2 d14	carboplatin + paclitaxel d14	290	OvC7		8.14993e+07	2.10592e+07	3.05269e+07	2.3126e+06	1.65205e+06	2.75717e+06	7.19701e+07	4.75593e+07	3.15857e+07	2.46572e+07	7.39818e+07	9.29813e+07	3.08646e+06	239827	1.67924e+08	8.01987e+06	888048	2.38788e+07	2.05512e+06	5e+06	767645	1.85765e+07	164115	402062	4.6666e+07	571063	129575	1.61349e+07	1.52294e+06	2.49541e+06	2.3686e+06	1.1267e+08	114088	22738.1	3.58133e+06	2.82672e+06	3.87651e+06	1.0932e+08	2.31753e+08	1.631e+07	2.74856e+07	1.18912e+06	4.08975e+06	525209
CS25176	290 E1 d21	carboplatin + paclitaxel d21	290	OvC7		7.50513e+07	2.45615e+07	3.1902e+07	2.69463e+06	1.94268e+06	3.16922e+06	6.46218e+07	5.09409e+07	3.32399e+07	3.01814e+07	8.44067e+07	1.05863e+08	3.81622e+06	262381	2.16489e+08	8.60559e+06	1.08682e+06	2.68827e+07	2.43467e+06	5.74928e+06	834517	1.93778e+07	154639	930937	4.19146e+07	526748	119991	1.86347e+07	1.56461e+06	2.9282e+06	2.59911e+06	1.29789e+08	122506	82783.8	3.70289e+06	3.20027e+06	4.20762e+06	1.10947e+08	2.15076e+08	1.74778e+07	2.74881e+07	1.4483e+06	4.37478e+06	425282
CS25177	290 E2 d21	carboplatin + paclitaxel d21	290	OvC7		8.54606e+07	2.10208e+07	2.9641e+07	2.42105e+06	1.82402e+06	2.60832e+06	7.5552e+07	4.89756e+07	3.35286e+07	2.26471e+07	6.75417e+07	8.9033e+07	3.39591e+06	208361	1.93549e+08	7.4742e+06	1.02144e+06	2.42348e+07	1.99509e+06	5.08356e+06	779894	2.06332e+07	163865	930316	4.55517e+07	531436	121667	1.432e+07	2.52781e+06	2.51691e+06	2.45601e+06	1.13957e+08	115776	19366.9	1.82462e+06	2.94206e+06	3.61114e+06	1.15635e+08	2.17745e+08	1.70344e+07	3.08056e+07	951443	4.20932e+06	470831
CS25178	media only 1	media baseline control	media			6.98653e+07	2.35561e+07	3.17667e+07	2.67439e+06	2.1178e+06	913674	5.9618e+07	4.53402e+07	3.29052e+07	2.72773e+07	7.91315e+07	1.00728e+08	3.55695e+06	232702	2.26201e+08	8.61966e+06	1.01617e+06	2.8196e+07	2.31695e+06	5.30692e+06	856308	2.01441e+07	172752	1.97153e+06	4.22436e+07	583250	132932	1.78538e+07	2.75076e+06	2.84846e+06	2.27069e+06	1.26508e+08	121032	18965.4	2.7323e+06	2.99147e+06	4.36767e+06	1.14908e+08	2.23236e+08	1.54255e+07	2.79065e+07	1.13259e+06	4.25031e+06	457736
CS25179	media only 2	media baseline control	media			9.91001e+07	2.48313e+07	3.29819e+07	2.96236e+06	1.97699e+06	999493	8.86597e+07	4.8484e+07	3.32313e+07	2.6344e+07	8.80116e+07	1.14993e+08	3.67175e+06	251208	2.35952e+08	8.66192e+06	1.05767e+06	2.82962e+07	2.47137e+06	5.95352e+06	851320	2.53072e+07	156458	2.17345e+06	4.57654e+07	556284	127550	1.86604e+07	2.71341e+06	3.54172e+06	2.56597e+06	1.33104e+08	129754	25828.9	2.81385e+06	3.36273e+06	4.69082e+06	1.13123e+08	2.2459e+08	1.54424e+07	2.78901e+07	1.151e+06	4.3975e+06	457566
CS25180	media + SOC 1	media + drugs baseline control	media			7.43964e+07	2.47688e+07	3.17257e+07	2.9853e+06	2.05369e+06	1.28482e+06	6.31508e+07	5.27397e+07	3.18878e+07	2.80451e+07	9.01135e+07	1.15491e+08	3.58523e+06	255183	2.45442e+08	9.46788e+06	1.14259e+06	3.03797e+07	2.51329e+06	5.85801e+06	877853	1.159e+07	137312	2.22136e+06	4.22702e+07	553719	135216	1.91139e+07	2.37026e+06	3.13894e+06	2.62239e+06	1.32658e+08	132978	10452.3	1.41313e+06	3.31522e+06	4.19272e+06	1.1395e+08	2.10225e+08	1.56816e+07	2.43123e+07	1.45772e+06	4.0782e+06	423348
CS25181	media + SOC 2	media + drugs baseline control	media			8.11991e+07	2.73445e+07	3.3202e+07	2.98003e+06	1.92877e+06	1.38492e+06	7.00953e+07	4.98489e+07	3.4232e+07	2.9587e+07	9.31184e+07	1.21283e+08	4.01274e+06	296604	2.52573e+08	9.47347e+06	1.12018e+06	3.06102e+07	2.71744e+06	6.19205e+06	854047	1.14271e+07	154430	2.29934e+06	4.32082e+07	513510	117894	2.06887e+07	2.3816e+06	3.51558e+06	3.42406e+06	1.41465e+08	136482	14026.8	1.23527e+06	3.54793e+06	4.76237e+06	1.20856e+08	2.02001e+08	1.6094e+07	2.94198e+07	1.44018e+06	3.94101e+06	474959
[truncated: 1,128 more columns]

## Sheet: Annotation level 3
					DP	19.6328	10.6969	2.13719	0.902698	18.0827	25.4289	4.55861	5.21728	5.76997	24.8707	7.52845	1.09634	0.828322	18.3605	0.946351	1.74597	5.83949	4.35058	1.19108	7.26369	6.23091	8.92524	1.12017	0.897673	7.53523	2.24965	3.40654	3.92906	1.92711	14.5007	1.44659	2.4546	15.9664	1.89937	1.43289	1.37502	1.21074	1.20674	2.94153	1.11165	1.05598	15.3822	4.06682	19.1141
					Relative precision (%)	7.6963	10.3539	3.48583	6.63583	5.78118	8.4901	9.31141	7.68633	3.91606	3.98274	5.42297	5.36047	7.5927	6.20126	6.6549	4.09692	5.884	5.21807	13.2853	3.32013	8.84739	4.89638	7.86929	6.84415	3.94629	4.77256	9.30241	4.64467	10.1472	6.15933	6.88853	4.41964	9.38231	3.10031	3.68679	8.51554	3.68679	3.47185	18.8299	12.4346	11.1227	8.22107	10.0731	6.91246
					LOD	179211	47682.4	6.19365e+06	12006.3	691726	8077.51	185121	18631.4	11600.2	2.55117e+06	39842.7	12196.8	15472.6	176375	15759.8	10970.4	222039	39160.7	15526.6	376782	37562.8	13758.7	16749.6	12870.4	95373.9	11634.1	57524	920817	15904.9	54882.3	68726.3	14117.6	34402.8	20772.1	33092.6	41340.8	35077.8	34639.7	16117.7	14198.3	5449.77	1.84372e+06	10033.9	1.04925e+06
					RT [min]	7.033	6.94	1.078	1.381	6.943	1.539	1.355	2.312	4.821	6.947	6.597	0.989	1.52	7.009	1.411	1.102	1.466	6.921	1.068	6.918	1.452	4.431	1.132	1.455	1.221	2.307	1.375	4.939	1.218	5.118	6.454	2.311	8.185	1.118	6.454	1.289	6.465	1.455	6.013	1.128	1.249	8.184	1.288	8.183
					Molecular Weight	1138.7	237.1	225.944	690.426	766.457	426.088	281.111	279.132	173.117	783.483	215.056	286.168	256.106	854.509	339.997	280.203	69.0579	274.132	418.055	352.109	203.079	296.05	138.043	332.052	132.042	103.046	102.032	85.0528	408.105	209.069	225.064	132.025	242.188	153.01	207.053	162.016	193.038	383.137	281.112	244.226	176.08	224.178	74.019	206.167
					Formula	C58 H108 O17 P2	C12 H15 N O4	C6 H4 Cl2 O5	C39 H63 O8 P	C45 H67 O8 P	C13 H22 N4 O8 S2	C10 H19 N O8	C11 H21 N O7	C7 H15 N3 O2	C45 H70 N O8 P	C5 H14 N O6 P	C17 H22 N2 O2	C11 H16 N2 O5	C42 H80 O13 P2	C6 H14 O12 P2	C17 H28 O3	C4 H7 N	C15 H18 N2 O3	C19 H14 O11	C16 H20 N2 O5 S	C8 H13 N O5	C9 H16 N2 O5 S2	C6 H6 N2 O2	C10 H13 N4 O7 P	C5 H8 O4	C4 H9 N S	C4 H6 O3	C4 H7 N O	C19 H20 O10	C10 H11 N O4	C10 H11 N O5	C5 H8 O2 S	C14 H26 O3	C3 H7 N O4 S	C10 H9 N O4	C5 H6 O6	C9 H7 N O4	C21 H21 N O6	C11 H15 N5 O4	C12 H28 N4 O	C6 H12 N2 O4	C14 H24 O2	C3 H6 S	C14 H22 O
					Annotation level	3	3	3	3	3	3	3	3	3	3	3	3	3	3	3	3	3	3	3	3	3	3	3	3	3	3	3	3	3	3	3	3	3	3	3	3	3	3	3	3	3	3	3	3
					Name	(12R,24R)-15,18,21-Trihydroxy-12-[(octanoyloxy)methyl]-15,21-dioxido-10,27-dioxo-11,14,16,20,22,26-hexaoxa-15lambda~5~,21lambda~5~-diphosphanonatriacontan-24-yl (9Z,11Z)-9,11-octadecadienoate	(1R)-6-Hydroxy-7-methoxy-1-methyl-1,2,3,4-tetrahydro-1-isoquinoliniumcarboxylate	(2E)-2,5-Dichloro-4-oxo-2-hexenedioic acid	(2R)-1-(Phosphonooxy)-3-[(9Z)-9-tetradecenoyloxy]-2-propanyl (4Z,7Z,10Z,13Z,16Z,19Z)-4,7,10,13,16,19-docosahexaenoate	(2R)-1-[(5Z,8Z,11Z,14Z,17Z)-5,8,11,14,17-Icosapentaenoyloxy]-3-(phosphonooxy)-2-propanyl (4Z,7Z,10Z,13Z,16Z,19Z)-4,7,10,13,16,19-docosahexaenoate	(2S)-2-Amino-5-({(2R)-3-[(2-amino-2-carboxyethyl)disulfanyl]-1-[(carboxymethyl)amino]-1-oxo-2-propanyl}amino)-5-oxopentanoic acid (non-preferred name)	(2S)-3-Hydroxy-2-({[(3S,4S,5R)-2,3,4-trihydroxy-5-(hydroxymethyl)tetrahydro-2-furanyl]methyl}amino)butanoic acid (non-preferred name)	(2S)-3-Methyl-2-({[(3S,4S,5R)-2,3,4-trihydroxy-5-(hydroxymethyl)tetrahydro-2-furanyl]methyl}amino)butanoic acid (non-preferred name)	(2S)-6-Amino-2-[(E)-(hydroxymethylene)amino]hexanimidic acid	(3Z,6Z,9Z,12Z,21R)-27-Amino-24-hydroxy-24-oxido-18-oxo-19,23,25-trioxa-24lambda~5~-phosphaheptacosa-3,6,9,12-tetraen-21-yl (4Z,7Z,10Z,13Z,16Z,19Z)-4,7,10,13,16,19-docosahexaenoate	(S)-?-glycerophosphorylethanolamine	[(8beta)-10-Methoxy-6-methylergolin-8-yl]methanol	1-(beta-D-Ribofuranosyl)-1,4-dihydronicotinamide	1,2-dioleoyl-sn-glycero-3-phospho-(1'-sn-glycerol-3'-phosphate)	1,6-Di-O-phosphono-alpha-D-glucopyranose	12(S)-HHT	1-pyrroline	2-(4-Isopropyl-4-methyl-5-oxo-4,5-dihydro-1H-imidazol-2-yl)-4-methylbenzoic acid	2-{[5,8-Dihydroxy-3-(4-hydroxyphenyl)-4-oxo-4H-chromen-7-yl]oxy}-3-hydroxysuccinic acid	2-{Carboxy[(phenylacetyl)amino]methyl}-5,5-dimethyl-1,3-thiazolidine-4-carboxylic acid	2-Acetamidohexanedioic acid	2-Amino-3-{[({2-carboxy-2-[(Z)-(1-hydroxyethylidene)amino]ethyl}sulfanyl)methyl]sulfanyl}propanoic acid (non-preferred name)	2-Aminonicotinic acid	2'-Deoxy-5'-inosinic acid	2-Hydroxy-4-oxopentanoic acid	2-Methylthiazolidine	2-Oxobutyric acid	2-Pyrrolidone	3-[(1E)-1-Buten-1-yl]-5-hydroxy-1-oxo-1H-isochromen-6-yl hexopyranosiduronic acid	3-Carbamoyl-2-phenylpropionic acid	3-Methoxy-4-hydroxyhippuric acid	3-Methylsulfolene	3-Oxotetradecanoic acid	3-Sulfino-L-alanine	4-(2-Aminophenyl)-2,4-dioxobutanoic acid	4-Hydroxy-2-oxoglutaric acid	5,6-dihydroxy-2-indolecarboxylic acid	6,7,8,9-Tetrahydro-11,12-dimethoxy-7-methylbenzo[g][1,3]benzodioxolo[4,5-c]azecine-14,15-dione	9-(2-O-Methylpentofuranosyl)-9H-purin-6-amine	acetylspermine	ala-ser	Allyl cyclohexanevalerate	Allyl mercaptan	a-Methylionone
					Compound #	X00136	X02623	X00194	X02906	X00152	X03218	X01793	X02397	X03489	X00053	X03128	X01669	X03359	X00378	X03262	X03515	X00332	X03264	X02224	X00178	X02405	X02920	X03263	X02828	X01429	X00391	X00267	X02065	X01751	X00120	X02061	X00292	X00820	X02717	X02530	X01461	X02163	X02785	X03502	X02116	X02836	X00674	X02550	X00761
MS-Omics ID	Customer ID	Treatment	original legend	OvC case	Unit	Area	Area	Area	Area	Area	Area	Area	Area	Area	Area	Area	Area	Area	Area	Area	Area	Area	Area	Area	Area	Area	Area	Area	Area	Area	Area	Area	Area	Area	Area	Area	Area	Area	Area	Area	Area	Area	Area	Area	Area	Area	Area	Area	Area
_QC00						5.95156e+07	752502	6.70903e+07	184534	1.48447e+08	190051	2.9806e+06	1.5958e+06	871649	5.05836e+08	1.54568e+06	87179.6	216151	2.58603e+07	249806	41535.2	2.69734e+07	1.2765e+06	135607	2.18457e+08	1.23063e+06	1.32944e+06	143924	203236	7.92279e+06	5.40384e+06	1.38289e+07	4.01685e+06	7.12245e+06	2.6525e+06	306304	8.55513e+06	1.88065e+06	92557.5	151964	459052	160076	166049	55888.4	99282.8	31025.9	9.04725e+06	281068	6.95796e+06
_QC01						5.15995e+07	734574	6.23893e+07	195245	1.0646e+08	169348	2.4319e+06	1.38309e+06	819137	4.3338e+08	1.60729e+06	87340.1	258077	2.50457e+07	247128	40991.2	2.60455e+07	1.18763e+06	114674	2.02312e+08	1.23744e+06	1.30478e+06	140787	213886	7.34116e+06	4.92258e+06	1.30476e+07	3.87657e+06	9.77274e+06	2.24025e+06	307283	7.97133e+06	1.74432e+06	91649	152425	414270	160561	166406	61998.5	107057	21635.7	7.58432e+06	240782	5.43347e+06
_QC02						6.28833e+07	1.03446e+06	6.81232e+07	183726	1.55711e+08	208638	3.34339e+06	1.55802e+06	960647	5.27151e+08	1.65837e+06	92002.2	250206	3.0142e+07	249310	38906.8	2.72257e+07	1.39705e+06	135224	2.35314e+08	1.25e+06	1.53442e+06	151230	219698	7.51409e+06	5.79482e+06	1.15537e+07	4.0603e+06	6.19772e+06	2.51844e+06	411040	9.64065e+06	2.10451e+06	94400	173694	477774	182966	173813	66423	109900	32963.8	8.73169e+06	344029	6.67535e+06
_QC03						5.30128e+07	993460	6.91726e+07	234744	1.56137e+08	168542	3.37679e+06	1.53731e+06	860239	5.30918e+08	1.59806e+06	91974.3	259382	2.64801e+07	295973	41508.2	2.73618e+07	1.30625e+06	166722	2.29974e+08	1.38048e+06	1.51322e+06	145347	252932	7.40315e+06	5.56745e+06	1.44671e+07	4.22651e+06	6.82898e+06	2.51254e+06	316139	8.91967e+06	1.96205e+06	91323.3	156611	471166	164971	170628	52309.9	125237	29112.9	1.0297e+07	266929	6.96798e+06
_QC04						6.40001e+07	1.06647e+06	7.17363e+07	232952	1.50966e+08	185149	3.13892e+06	1.84256e+06	918811	5.10922e+08	1.81719e+06	104573	302515	2.78919e+07	270880	42773.2	2.76454e+07	1.37658e+06	142896	2.3078e+08	1.3512e+06	1.54707e+06	126899	251430	7.2084e+06	6.055e+06	1.4197e+07	4.41114e+06	7.26137e+06	2.50464e+06	341863	9.79711e+06	1.892e+06	95230.1	169160	456627	178190	171379	142109	144649	33261.1	8.38689e+06	318347	6.42213e+06
_QC05						6.0413e+07	1.00912e+06	6.79333e+07	243298	1.51153e+08	196058	3.23524e+06	1.43776e+06	859699	5.12002e+08	1.60714e+06	105802	315328	2.47406e+07	297261	42124.2	2.77368e+07	1.27659e+06	126138	2.1752e+08	1.35814e+06	1.35619e+06	127798	257618	7.57945e+06	5.47012e+06	1.3623e+07	4.20442e+06	8.87016e+06	2.43535e+06	338602	8.84223e+06	1.75076e+06	89745.3	167356	427191	176290	178201	115909	129887	23713	8.98e+06	230372	6.006e+06
_QC06						6.10186e+07	964532	7.14807e+07	234564	1.49343e+08	196719	3.21385e+06	1.70307e+06	915007	5.19246e+08	1.66975e+06	105963	254320	2.63444e+07	299264	40232.2	2.84625e+07	1.31889e+06	191736	2.34854e+08	1.50987e+06	1.54579e+06	148824	234220	7.75252e+06	5.86719e+06	1.38668e+07	4.48727e+06	7.27637e+06	2.53104e+06	334606	9.49697e+06	1.86724e+06	93622.2	165195	539672	174014	170014	92703.6	139247	30875.1	1.01667e+07	269603	7.41945e+06
_QC07						6.25812e+07	920135	6.32115e+07	230085	1.40852e+08	207697	3.55113e+06	1.63825e+06	913436	4.88546e+08	1.51015e+06	89729.7	309405	2.67571e+07	319635	44324.3	2.71231e+07	1.27926e+06	118209	2.20218e+08	1.41984e+06	1.41339e+06	119034	277425	7.86443e+06	5.22596e+06	1.59486e+07	4.48355e+06	7.78705e+06	2.40711e+06	327310	8.72436e+06	1.94418e+06	91995.9	161413	408609	170030	171987	104625	97993	26334.3	1.05332e+07	224428	7.50955e+06
_QC08						6.80829e+07	990591	7.39461e+07	221163	1.51001e+08	214703	3.33098e+06	1.63898e+06	976139	5.26191e+08	1.63131e+06	105345	250607	2.86709e+07	290235	42054.8	2.83547e+07	1.37518e+06	165595	2.37651e+08	1.31631e+06	1.5025e+06	150575	253844	7.24999e+06	5.92368e+06	1.42171e+07	4.53733e+06	6.64392e+06	2.48607e+06	331115	9.30134e+06	2.03778e+06	96688.8	163109	508346	171816	184171	105538	123933	32052.9	9.9019e+06	274567	7.65168e+06
_QC09						6.06606e+07	1.03418e+06	6.94149e+07	228343	1.38642e+08	208297	3.14116e+06	1.40386e+06	894113	4.90776e+08	1.70355e+06	103697	256111	2.72627e+07	288837	41354.6	2.6891e+07	1.38431e+06	138365	2.15751e+08	1.29204e+06	1.46296e+06	145200	261981	7.77741e+06	5.41643e+06	1.34952e+07	4.31232e+06	8.58416e+06	2.36101e+06	318614	8.49256e+06	1.88614e+06	90791.8	156779	436867	165148	172048	105460	116073	25204.4	9.36913e+06	291350	6.85005e+06
_QC10						6.77262e+07	995497	7.27474e+07	214961	1.54901e+08	210954	3.27851e+06	1.7187e+06	940070	5.34758e+08	1.56784e+06	97414.1	252424	3.18147e+07	289922	46000.4	2.8278e+07	1.42616e+06	162463	2.38497e+08	1.33471e+06	1.48158e+06	144879	226640	7.76866e+06	5.5452e+06	1.38859e+07	4.67699e+06	6.10277e+06	2.4646e+06	337225	8.97472e+06	2.09166e+06	93634.1	165756	525669	174605	171611	118973	130549	31807.8	1.06466e+07	295439	7.44882e+06
_QC11						7.05373e+07	967009	7.24191e+07	220027	1.43668e+08	212804	3.351e+06	1.49382e+06	977665	5.19011e+08	1.58275e+06	94860.1	273893	2.94034e+07	272869	41328.8	2.86416e+07	1.37221e+06	165230	2.22787e+08	1.39834e+06	1.48093e+06	124686	223554	7.50757e+06	5.97007e+06	1.5802e+07	4.70822e+06	7.60558e+06	2.45394e+06	348574	9.79408e+06	1.84243e+06	87268	171150	429209	180287	174917	108877	128515	33684.5	9.26271e+06	309623	7.08429e+06
_QC12						6.74246e+07	984497	7.00567e+07	223833	1.50551e+08	190892	3.26974e+06	1.52744e+06	864719	5.15549e+08	1.4246e+06	98827.6	259801	2.91157e+07	253265	46128.2	2.83918e+07	1.40173e+06	141616	2.23176e+08	1.34998e+06	1.43031e+06	156604	235835	7.96697e+06	5.64208e+06	1.50155e+07	4.1066e+06	8.15453e+06	2.45557e+06	354311	9.14951e+06	1.87059e+06	94594	173782	499380	183059	170850	97021.9	120240	29737.2	9.55845e+06	315413	7.03676e+06
_QC13						6.33366e+07	914551	6.99788e+07	224966	1.42971e+08	180278	3.02225e+06	1.56538e+06	904536	4.99035e+08	1.57023e+06	97118.2	240698	2.89291e+07	280665	42288.5	2.76485e+07	1.26971e+06	169663	2.25769e+08	1.37288e+06	1.51173e+06	144093	221690	8.22785e+06	5.86684e+06	1.46586e+07	4.39255e+06	8.17758e+06	2.53844e+06	420615	9.20167e+06	1.70188e+06	90807.1	166131	441301	175000	171393	87910.3	137741	31257.1	9.23585e+06	306716	6.46175e+06
_QC14						5.53594e+07	974331	6.65838e+07	218481	1.4257e+08	178998	3.15904e+06	1.53281e+06	868889	4.73978e+08	1.56517e+06	92583	252545	2.57303e+07	266827	41915.1	3.54928e+07	1.32524e+06	114411	2.13421e+08	1.34282e+06	1.54301e+06	142473	236130	7.49745e+06	6.14712e+06	1.31122e+07	4.21561e+06	8.64708e+06	2.32234e+06	320596	9.57381e+06	2.06272e+06	96023.4	156915	507625	165291	187099	96617.8	76110.1	37779.9	9.61917e+06	292204	7.55539e+06
_QC15						6.00306e+07	854607	6.9319e+07	216947	1.45444e+08	192364	3.08822e+06	1.60092e+06	917772	5.02926e+08	1.54094e+06	87486.4	272582	2.54022e+07	275452	40692.5	2.63761e+07	1.20595e+06	152097	2.31503e+08	1.22896e+06	1.52941e+06	130556	250173	7.58156e+06	5.67857e+06	1.45298e+07	4.25877e+06	6.56478e+06	2.51753e+06	347814	9.29508e+06	1.96689e+06	93321.2	170059	412358	179138	172402	91412.1	101371	31119.2	9.4592e+06	290942	6.88331e+06
_QC16						5.393e+07	1.0916e+06	6.81626e+07	209379	1.42489e+08	166687	3.01646e+06	1.49644e+06	901337	5.06252e+08	1.50573e+06	98436.7	250694	2.43138e+07	272863	43430.2	2.63526e+07	1.27155e+06	126654	2.20449e+08	1.1749e+06	1.3603e+06	149501	235355	8.06173e+06	5.17323e+06	1.48468e+07	4.08595e+06	7.92868e+06	2.47958e+06	323155	8.71372e+06	1.95569e+06	95466.6	157840	466656	166266	181715	84975.4	113897	24318.1	9.08228e+06	262320	6.74146e+06
_QC17						6.29111e+07	974576	6.96145e+07	195878	1.45155e+08	189194	3.03649e+06	1.58753e+06	936045	5.19395e+08	1.62813e+06	96210	282102	2.66808e+07	297694	40051.1	2.64405e+07	1.35856e+06	152868	2.21286e+08	1.16783e+06	1.47464e+06	163095	238331	7.39658e+06	5.53306e+06	1.38027e+07	4.25629e+06	6.94031e+06	2.48161e+06	348448	8.99717e+06	1.86079e+06	94846	170020	507593	179096	163129	97278.2	131475	29859.9	8.10981e+06	312812	6.7119e+06
_QC18						5.93535e+07	800981	6.79373e+07	217551	1.45089e+08	191358	3.31127e+06	1.35762e+06	847604	5.05657e+08	1.79184e+06	94583	265116	2.81435e+07	266959	38941.3	2.74299e+07	1.28291e+06	135349	2.19482e+08	1.43679e+06	1.40952e+06	131571	241268	7.1157e+06	5.5081e+06	1.26759e+07	4.21775e+06	7.96944e+06	2.40192e+06	324922	8.97683e+06	1.90616e+06	96589.7	158380	478432	166835	172367	88598	129796	28453.5	9.05905e+06	266838	6.50112e+06
_QC19						5.81562e+07	979790	6.76324e+07	220151	1.41746e+08	181872	3.17378e+06	1.9001e+06	868569	5.06293e+08	1.58472e+06	97144.4	268564	2.59275e+07	273426	39927.6	2.60746e+07	1.29939e+06	144809	2.24433e+08	1.25149e+06	1.39103e+06	126488	224158	7.32628e+06	5.6127e+06	1.27702e+07	4.20981e+06	7.51357e+06	2.33766e+06	338019	8.78683e+06	1.8993e+06	88575.9	164693	411982	173485	169654	91730	114530	26224	8.74137e+06	270555	6.60032e+06
_QC20						5.52378e+07	871117	6.54711e+07	206386	1.45034e+08	216560	3.00852e+06	1.51785e+06	892016	4.92914e+08	1.77526e+06	94817.4	258736	2.76803e+07	263877	42707.3	2.6266e+07	1.34326e+06	132508	2.29225e+08	1.4901e+06	1.43556e+06	139565	233519	7.57114e+06	5.30297e+06	1.30242e+07	4.06437e+06	7.42744e+06	2.68352e+06	309361	8.67863e+06	1.87434e+06	89002.7	150579	445553	158617	163863	74232.7	123177	28087.5	9.73903e+06	245341	6.23066e+06
_QC21						5.89005e+07	965853	7.03329e+07	213287	1.5149e+08	201513	3.24296e+06	1.56456e+06	912655	5.38857e+08	1.70684e+06	99450.3	253240	2.78523e+07	261308	42321.2	2.89382e+07	1.33872e+06	164746	2.2959e+08	1.2281e+06	1.4892e+06	151110	223518	7.71321e+06	5.72603e+06	1.38303e+07	4.34142e+06	7.04165e+06	2.92897e+06	326098	9.08858e+06	1.2061e+06	94552	157086	478677	165472	177598	92993	119416	29920.2	8.22799e+06	321302	6.52486e+06
_QC22						5.8513e+07	805984	6.65336e+07	205131	1.39664e+08	187570	3.10242e+06	1.48774e+06	853162	4.79711e+08	1.5672e+06	95517	244862	2.63922e+07	258678	41557.7	2.65019e+07	1.27922e+06	130580	2.15767e+08	1.29699e+06	1.36757e+06	147957	213230	7.15422e+06	5.27722e+06	1.346e+07	4.07103e+06	8.32934e+06	2.29712e+06	341533	8.62938e+06	2.09593e+06	89616	164522	436746	173304	180162	97253.1	121841	24574.8	9.41772e+06	260678	6.89293e+06
_QC23						6.2053e+07	1.18484e+06	7.00997e+07	208567	1.47214e+08	200074	3.26151e+06	1.58201e+06	902262	5.05462e+08	1.66129e+06	95912	283175	2.84964e+07	263088	41657.7	2.91268e+07	1.346e+06	162959	2.31235e+08	1.34246e+06	1.58619e+06	125927	232014	7.93574e+06	5.90704e+06	1.496e+07	4.28314e+06	7.30828e+06	2.46078e+06	336974	9.49655e+06	1.90417e+06	96114.2	162325	423503	170991	168920	82485.1	117729	31972.5	9.3011e+06	280520	6.75285e+06
_QC24						5.88544e+07	1.00297e+06	6.93828e+07	240636	1.41132e+08	197572	2.48866e+06	1.76708e+06	897645	4.98864e+08	1.60271e+06	100123	248359	2.43538e+07	275310	42376.9	2.7095e+07	1.25691e+06	124604	2.1964e+08	1.36817e+06	1.46168e+06	145477	247920	7.71218e+06	5.57507e+06	1.51729e+07	4.29533e+06	7.94222e+06	2.36301e+06	341485	8.94513e+06	2.31616e+06	92735.1	164498	491321	173279	173675	104806	136712	27977.2	9.60369e+06	270158	6.7546e+06
_QC25						6.23275e+07	879641	6.94405e+07	202318	1.43356e+08	178386	3.72936e+06	1.62063e+06	920263	5.03917e+08	1.55708e+06	95670.2	282569	2.7702e+07	305285	40440.9	2.71411e+07	1.32858e+06	124241	2.2285e+08	1.30116e+06	1.36689e+06	137887	245005	7.33371e+06	5.76668e+06	1.5763e+07	4.57606e+06	6.98024e+06	2.42896e+06	344858	9.35823e+06	2.13089e+06	93043.3	166123	477706	174991	168844	93774.8	114252	31688.3	1.08585e+07	290182	7.22611e+06
_QC26						6.17596e+07	924712	6.71963e+07	220028	1.44229e+08	206949	3.35503e+06	1.46214e+06	927970	4.95151e+08	1.60804e+06	91805.6	262657	2.85606e+07	288445	42948.3	2.72904e+07	1.24941e+06	161938	2.2716e+08	1.24959e+06	1.46495e+06	153156	262973	7.14348e+06	5.67333e+06	8.99585e+06	4.30415e+06	7.19094e+06	2.46336e+06	342288	9.23724e+06	1.782e+06	93583.9	164885	545721	173687	172290	87084.1	89925	31521.7	7.99795e+06	259083	6.28859e+06
_QC27						6.29244e+07	806791	6.75054e+07	228114	1.47188e+08	201050	2.78361e+06	1.5904e+06	913873	5.26628e+08	1.55056e+06	94330.9	267565	2.68803e+07	283598	43653.9	2.76842e+07	1.43759e+06	132443	2.20524e+08	1.79557e+06	1.4552e+06	120864	249684	8.26662e+06	5.34827e+06	1.4884e+07	4.11235e+06	7.97212e+06	2.32561e+06	330230	8.77364e+06	1.98188e+06	89603.2	159077	409105	167568	162984	98300.9	130169	28412.2	9.62193e+06	255833	7.2078e+06
_QC28						6.48299e+07	927540	6.80184e+07	226398	1.52915e+08	178227	3.79121e+06	1.50412e+06	904530	5.17855e+08	1.59763e+06	93156.2	282330	2.73669e+07	305183	40366.7	2.67932e+07	1.36277e+06	155332	2.27141e+08	1.16557e+06	1.41511e+06	126324	255491	7.60633e+06	5.38048e+06	1.31489e+07	4.17121e+06	8.01197e+06	2.40193e+06	339292	8.81129e+06	1.92445e+06	89493.9	163442	405704	172167	164169	85234.6	122727	31065.5	9.83107e+06	266405	6.97672e+06
_QC29						5.87353e+07	913059	6.9456e+07	221342	1.41939e+08	172661	2.56908e+06	1.53488e+06	893867	4.89382e+08	1.66413e+06	100568	263021	2.88295e+07	299540	40202.2	2.81772e+07	1.33753e+06	147115	2.26686e+08	1.25263e+06	1.40853e+06	148979	237694	7.75391e+06	5.43032e+06	1.45373e+07	4.33528e+06	8.1808e+06	2.35813e+06	344818	8.68538e+06	1.86484e+06	91984.5	166104	507986	174971	179178	92824.1	106530	29283.9	9.11415e+06	328511	6.76097e+06
_QC30						6.95294e+07	968987	7.03748e+07	227417	1.44549e+08	202016	3.34469e+06	1.43482e+06	892614	4.86618e+08	1.59759e+06	94754.2	272603	2.78827e+07	271689	43856.6	2.76112e+07	1.44987e+06	130379	2.28949e+08	1.31145e+06	1.54547e+06	140636	234131	7.57273e+06	5.65032e+06	1.34814e+07	4.19276e+06	7.25564e+06	2.35243e+06	346923	8.84094e+06	2.01605e+06	94921.4	167118	452571	176039	168804	90891.9	130306	31264.7	9.261e+06	307738	7.23251e+06
_QC31						5.23482e+07	1.08403e+06	6.79067e+07	206964	1.37742e+08	167564	3.22577e+06	1.67844e+06	882430	5.01957e+08	1.55584e+06	91586.7	279996	2.72057e+07	274116	40180.6	2.68101e+07	1.19102e+06	150866	2.20647e+08	1.36667e+06	1.3876e+06	144893	235411	7.59515e+06	5.78795e+06	1.39864e+07	4.13127e+06	7.46101e+06	2.45763e+06	339352	9.38647e+06	1.97188e+06	98520.2	163471	480067	172197	172128	104006	126600	28494.6	1.01938e+07	279933	7.01824e+06
_QC32						5.9944e+07	874636	6.83482e+07	206289	1.46127e+08	181956	3.34673e+06	1.66431e+06	882480	5.14496e+08	1.52462e+06	101863	249881	2.53755e+07	264689	41300.9	2.75907e+07	1.21674e+06	120758	2.23121e+08	1.28967e+06	1.45003e+06	134706	219784	7.75278e+06	5.73675e+06	1.40542e+07	4.64694e+06	7.76196e+06	2.28799e+06	342618	9.15106e+06	1.93025e+06	86845	165044	463075	173855	183125	91479.9	106750	27074.9	9.20797e+06	254326	6.77448e+06
_QC33						6.04463e+07	987365	6.96173e+07	214639	1.49519e+08	236244	2.90058e+06	1.56114e+06	921267	5.15862e+08	1.78217e+06	97701.8	244941	2.74263e+07	253345	43423.1	2.90654e+07	1.37485e+06	172005	2.24189e+08	1.30075e+06	1.51944e+06	150245	233951	7.28136e+06	5.56155e+06	1.472e+07	4.13983e+06	7.22573e+06	2.93182e+06	322459	9.14827e+06	1.69397e+06	94974.9	155334	448342	163626	171400	89705	125185	29723.5	8.41125e+06	283726	6.22281e+06
CS25034	264 B1 d14	untreated d14	264	OvC8		686919	709529	6.94664e+07	211393	351856	81594.2	2.11749e+06	1.07162e+06	1.11575e+06	953072	1.74067e+06	90110.5	285094	949110	268585	43032.9	3.66845e+07	1.3917e+06	136053	2.34876e+08	1.11912e+06	1.50135e+06	123554	234376	7.29186e+06	5.76651e+06	1.35015e+07	3.12824e+06	8.25189e+06	3.52292e+06	369510	9.47263e+06	30377.9	90235.2	180964	419739	190624	168685	193019	70302.1	29913.9	192436	341945	152928
CS25035	264 B2 d14	untreated d14	264	OvC8		565719	808264	6.73705e+07	235438	376347	78915.1	1.95588e+06	1.27438e+06	1.09362e+06	1.47703e+06	1.67763e+06	90887	258849	785429	279038	42253.5	3.77134e+07	1.41667e+06	142883	2.33603e+08	1.10534e+06	1.50523e+06	151160	261305	7.11168e+06	5.59893e+06	1.31998e+07	2.65085e+06	7.6208e+06	3.3882e+06	444687	9.20029e+06	30858.9	97844.4	161622	460762	170250	180097	154569	90697.9	30106.6	520554	287904	194510
CS25036	264 B1 d21	untreated d21	264	OvC8		601154	454890	7.01566e+07	227123	295009	129678	2.51435e+06	1.51978e+06	876107	926085	1.05185e+06	109536	267864	901939	287874	42555.4	3.53269e+07	1.53509e+06	157236	2.65087e+08	964624	1.36395e+06	145741	243216	7.07225e+06	6.21925e+06	1.4449e+07	4.87545e+06	7.92015e+06	3.1509e+06	327545	9.99032e+06	27640	94794.5	161274	524043	169884	172622	102656	122555	29886.7	617809	256292	563151
CS25037	264 B2 d21	untreated d21	264	OvC8		550897	563249	6.77002e+07	213024	449101	145056	2.08637e+06	1.23844e+06	829610	1.67926e+06	976340	95977.9	264626	811782	279606	42667.5	3.56762e+07	1.27951e+06	134832	2.30357e+08	761728	1.29523e+06	129121	248529	6.31515e+06	6.09272e+06	1.088e+07	4.40272e+06	5.99732e+06	3.95826e+06	340738	9.5076e+06	27738.6	95196.5	168713	451997	177720	179470	85328.8	145953	32338.7	830982	237669	566924
CS25038	264 C1 d14	carboplatin d14	264	OvC8		684480	527317	6.75511e+07	216680	240293	63111.3	2.42859e+06	1.1943e+06	1.05379e+06	754426	1.99633e+06	100137	246596	1.01349e+06	276351	41528.2	3.3927e+07	1.42867e+06	148716	2.42178e+08	1.0225e+06	1.59997e+06	150501	237766	9.00214e+06	5.60825e+06	1.41841e+07	3.01449e+06	8.38559e+06	1.71116e+06	343880	8.58761e+06	26675.1	94387.9	168589	517034	177589	183272	278117	142240	29624.8	867556	282340	585331
CS25039	264 C2 d14	carboplatin d14	264	OvC8		609132	669475	6.44e+07	225790	339175	72033.6	2.11242e+06	1.15363e+06	992116	1.41975e+06	2.04443e+06	95206.5	296845	1.13287e+06	290104	42677.4	2.68488e+07	1.19456e+06	125725	2.21137e+08	1.01612e+06	1.42673e+06	146797	249717	6.54927e+06	4.73055e+06	1.42332e+07	3.32246e+06	6.78879e+06	2.09126e+06	359952	8.232e+06	28226.9	102914	177851	467779	187345	164802	225084	147382	31313.8	646032	261283	451177
CS25040	264 C1 d21	carboplatin d21	264	OvC8		645162	272928	7.38855e+07	214335	286270	51899	2.99823e+06	1.95317e+06	757414	996688	1.37346e+06	98119.5	266389	895811	274383	40966.4	2.28895e+07	1.56096e+06	180398	2.72605e+08	778763	1.29625e+06	150908	238869	9.78123e+06	5.5271e+06	1.78185e+07	4.21876e+06	7.10605e+06	1.81049e+06	479522	8.87013e+06	28261.4	97624	199737	579958	183631	177668	125558	149421	34458.8	841424	185858	529576
CS25041	264 C2 d21	carboplatin d21	264	OvC8		886811	171358	6.68296e+07	218049	713389	53120	2.65126e+06	1.52649e+06	728521	2.6262e+06	1.19852e+06	98437.3	276805	943375	259960	41414.4	1.58969e+07	1.54303e+06	107542	2.49017e+08	711045	1.16514e+06	128168	230491	9.75554e+06	5.27353e+06	1.73337e+07	4.014e+06	8.07843e+06	40242.1	374088	8.48644e+06	28387.4	89598.1	157424	405848	165827	175477	76057.8	134463	30024.8	1.00274e+06	149196	589291
CS25042	264 D1 d14	paclitaxel d14	264	OvC8		1.01235e+08	468436	7.14076e+07	250171	2.63882e+08	419173	2.10473e+06	1.25047e+06	1.09819e+06	8.63973e+08	1.9335e+06	97002.3	267615	5.4424e+07	290881	41807.2	3.98019e+07	1.52012e+06	125439	2.1316e+08	1.27627e+06	1.64889e+06	134372	236325	7.48082e+06	6.08162e+06	1.41759e+07	3.1568e+06	7.73099e+06	4.57626e+06	361876	9.6214e+06	4.10375e+06	95527.5	177546	428783	187024	169872	144360	139321	27484.3	1.82898e+07	386426	1.38773e+07
CS25043	264 D2 d14	paclitaxel d14	264	OvC8		5.98515e+08	348294	6.63777e+07	235611	2.87665e+08	362867	2.06963e+06	1.28138e+06	1.10216e+06	9.8195e+08	1.75074e+06	101659	268507	7.46835e+07	306232	42234.9	2.75536e+07	1.25871e+06	141311	2.07282e+08	1.38621e+06	1.51913e+06	154909	265870	7.83493e+06	5.24188e+06	1.33125e+07	2.69565e+06	5.99016e+06	3.27266e+06	355310	8.3792e+06	5.57849e+06	95463.9	174673	517076	183998	176422	84803.4	123453	27641.3	2.39778e+07	364778	1.89295e+07
CS25044	264 D1 d21	paclitaxel d21	264	OvC8		1.21038e+08	416355	6.59082e+07	208306	3.1213e+08	365817	1.92364e+06	1.33539e+06	787762	9.84828e+08	1.00764e+06	98911.9	253683	6.04613e+07	273404	39823.3	3.17667e+07	1.44076e+06	158023	2.17644e+08	1.02728e+06	1.30088e+06	147085	238047	7.57845e+06	5.85127e+06	1.41526e+07	3.89522e+06	7.0353e+06	6.17414e+06	340912	9.4368e+06	4.80891e+06	93902.4	166537	452333	175428	174272	92689.1	137698	30911.8	2.09597e+07	249915	1.58934e+07
CS25045	264 D2 d21	paclitaxel d21	264	OvC8		6.69658e+07	690035	6.86737e+07	237319	2.86293e+08	105939	1.91698e+06	1.12151e+06	768907	9.44203e+08	1.12801e+06	96682	270797	4.37818e+07	304367	64594.7	2.44258e+07	1.09229e+06	117071	1.89124e+08	1.06687e+06	1.21715e+06	147436	244653	7.10616e+06	6.17098e+06	1.12338e+07	3.75673e+06	7.38239e+06	6.15111e+06	345527	9.92127e+06	3.5575e+06	134204	170751	563257	179866	169700	83652.2	122188	29031.6	1.88952e+07	249722	1.30995e+07
CS25046	264 E1 d14	carboplatin + paclitaxel d14	264	OvC8		2.2319e+08	1.47028e+06	7.70622e+07	242011	3.70404e+08	207725	2.27854e+06	1.52189e+06	1.19714e+06	1.17306e+09	2.6225e+06	88420.4	269280	7.57401e+07	287951	42391.8	4.24827e+07	1.53411e+06	152975	2.4049e+08	1.7009e+06	1.70568e+06	135106	231317	6.88703e+06	6.01373e+06	1.25218e+07	3.11422e+06	7.02221e+06	4.58647e+06	372102	1.01589e+07	7.47816e+06	90325.7	181588	394930	191281	169247	129631	94531.7	27610.6	3.15525e+07	308338	2.42634e+07
CS25047	264 E2 d14	carboplatin + paclitaxel d14	264	OvC8		9.401e+07	1.12579e+06	6.99698e+07	219553	2.75283e+08	197436	2.2043e+06	1.16854e+06	1.02799e+06	9.38474e+08	2.19847e+06	104307	255115	4.49639e+07	273495	41199.7	3.8297e+07	1.2919e+06	148108	2.15153e+08	1.20024e+06	1.55137e+06	120432	238342	7.19685e+06	4.83225e+06	1.10432e+07	2.70401e+06	7.17328e+06	3.16316e+06	366842	8.12091e+06	6.13755e+06	95688.3	180454	402560	190087	177947	135182	118853	23846	2.75871e+07	252370	1.97666e+07
CS25048	264 E1 d21	carboplatin + paclitaxel d21	264	OvC8		1.58849e+08	420811	7.31081e+07	202146	3.20055e+08	283448	2.66594e+06	1.34191e+06	722720	1.05482e+09	1.37724e+06	105506	248259	6.29591e+07	291134	40779.8	3.02252e+07	1.38773e+06	110616	2.31437e+08	994050	1.43877e+06	126247	248614	8.53739e+06	5.52024e+06	1.57655e+07	4.19388e+06	8.03891e+06	4.68649e+06	364512	9.07064e+06	2.96666e+06	89446.9	179988	488128	189597	176707	145550	135682	29654.7	2.31126e+07	144560	1.7546e+07
CS25049	264 E2 d21	carboplatin + paclitaxel d21	264	OvC8		5.71254e+07	422339	6.26472e+07	247392	2.40308e+08	200093	2.40974e+06	1.15673e+06	644409	8.02635e+08	1.21991e+06	91987.9	235762	4.39332e+07	303999	63885.4	2.74417e+07	1.2538e+06	114267	1.9623e+08	901797	1.11706e+06	151958	220434	6.7198e+06	4.98424e+06	1.38236e+07	3.72727e+06	6.19368e+06	4.7117e+06	341446	8.0999e+06	4.99979e+06	125786	166507	558464	175395	171416	100163	112065	32111.7	2.23368e+07	179421	1.66313e+07
CS25050	265 B1 d14	untreated d14	265	OvC5		591048	1.31275e+06	6.85144e+07	225734	226550	63841.2	1.79739e+06	1.05674e+06	1.24456e+06	742794	1.88414e+06	96797.4	274355	868679	303995	40028.5	3.37178e+07	1.29829e+06	184100	2.24963e+08	1.14246e+06	1.54872e+06	128495	239234	6.00174e+06	5.61616e+06	1.13786e+07	2.99058e+06	5.62481e+06	833966	343214	8.83128e+06	30097	89054.6	165331	480101	174157	167557	58608.5	132971	29071.7	514299	445435	205685
CS25051	265 B2 d14	untreated d14	265	OvC5		608347	1.337e+06	6.55622e+07	214909	246114	41285.8	2.05966e+06	928847	1.16915e+06	948059	1.79302e+06	100388	260683	911211	295722	41150.8	3.05774e+07	1.23501e+06	130716	2.11366e+08	1.05194e+06	1.60434e+06	161204	263586	5.03994e+06	5.20068e+06	9.16768e+06	3.15418e+06	4.8754e+06	1.89347e+06	454731	8.55332e+06	45259.7	94140	167066	543678	175985	175619	48044.1	139242	27822.4	790195	392497	599099
CS25052	265 B1 d21	untreated d21	265	OvC5		606429	575958	7.00573e+07	199730	431679	61385.6	3.14771e+06	1.29638e+06	912205	1.51604e+06	1.10744e+06	99055.1	254431	857400	282015	41071	2.87735e+07	1.23215e+06	163729	2.14617e+08	1.04726e+06	1.25187e+06	137637	254157	6.8366e+06	6.36867e+06	1.25549e+07	4.24946e+06	6.81228e+06	1.03249e+06	308913	1.02007e+07	30478.4	89131.9	148808	514007	156752	168897	57291.7	128146	33990.1	780838	320831	589519
CS25053	265 B2 d21	untreated d21	265	OvC5		658102	748025	6.27e+07	232121	485735	43490.1	2.25795e+06	887005	809780	1.67815e+06	871705	92203	271037	839844	294740	40602.7	2.84333e+07	1.13485e+06	137972	1.79834e+08	743617	1.1206e+06	152422	240454	5.32756e+06	5.60605e+06	1.07693e+07	3.73015e+06	4.81618e+06	2.75486e+06	457271	8.95117e+06	35783.7	92156.4	163280	514952	171996	179093	73742	111732	31186.8	285948	226008	205635
CS25054	265 C1 d14	carboplatin d14	265	OvC5		592476	1.82508e+06	6.75542e+07	224316	248184	30859.2	1.91813e+06	952488	1.14488e+06	940403	2.10331e+06	97410.8	251711	834692	270425	39756.2	3.42102e+07	1.27995e+06	123674	2.24857e+08	3.04713e+06	1.42338e+06	152667	245424	6.91099e+06	5.50204e+06	5.52666e+06	3.15728e+06	7.00147e+06	1.21041e+06	346196	8.61808e+06	36045.9	95611.7	166768	527110	175670	164170	58837.7	138680	30173.1	506189	273980	242198
CS25055	265 C2 d14	carboplatin d14	265	OvC5		614680	1.7748e+06	6.49132e+07	216798	431718	22294.8	1.92379e+06	1.081e+06	1.0407e+06	1.5571e+06	1.97249e+06	100595	281255	917120	286490	39722.9	3.07037e+07	1.2175e+06	126655	2.06178e+08	2.49972e+06	1.42909e+06	129061	257621	6.33314e+06	5.25519e+06	1.24987e+07	2.8969e+06	6.0844e+06	2.53401e+06	343039	8.61502e+06	33155.8	93208	165247	464876	174068	166621	55202.6	140078	30121.6	626735	268611	390910
CS25056	265 C1 d21	carboplatin d21	265	OvC5		785843	307325	7.13653e+07	223836	494846	19820.6	3.82945e+06	1.68025e+06	825560	1.76143e+06	1.07481e+06	96194.2	244482	1.00775e+06	275708	41288.7	1.46948e+07	1.41336e+06	170859	2.48556e+08	1.10302e+06	1.25096e+06	127431	234459	1.05858e+07	5.59458e+06	2.02355e+07	3.87029e+06	8.60312e+06	47740	376215	8.95371e+06	30273.3	90184.8	171255	415941	180397	162134	52755	136081	31424.5	915805	159552	480440
CS25057	265 C2 d21	carboplatin d21	265	OvC5		791732	1.02599e+06	6.78998e+07	215247	2.11177e+06	23664.1	3.52697e+06	1.7095e+06	762141	8.20516e+06	1.17376e+06	98108.3	280501	918393	274077	39083.2	1.7401e+07	1.32693e+06	139041	2.47557e+08	1.12905e+06	1.16537e+06	125669	230778	9.12319e+06	5.33551e+06	1.61643e+07	3.98035e+06	7.50709e+06	2.04776e+06	352137	8.816e+06	41068.4	91991.2	169630	431841	178685	167634	65147.7	117528	31797	782303	169322	508774
CS25058	265 D1 d14	paclitaxel d14	265	OvC5		7.11627e+07	2.15475e+06	7.25585e+07	205371	2.64435e+08	101543	1.83686e+06	1.04863e+06	1.29829e+06	9.33023e+08	2.15629e+06	105250	249137	4.57423e+07	278082	42130.9	3.52901e+07	1.20641e+06	164110	2.14381e+08	1.66663e+06	1.63311e+06	129960	253215	5.42288e+06	5.71759e+06	1.21585e+07	2.98872e+06	5.95484e+06	675599	350839	9.30811e+06	7.61357e+06	92931	169004	436900	178026	181283	50314.8	127167	26939.1	2.70055e+07	439979	2.05071e+07
CS25059	265 D2 d14	paclitaxel d14	265	OvC5		8.38897e+07	2.34464e+06	6.60774e+07	235293	2.59935e+08	171837	1.8517e+06	916857	1.23232e+06	8.99605e+08	2.16079e+06	92983.9	290015	4.69497e+07	309203	42330.5	3.83902e+07	1.28038e+06	155208	2.00117e+08	2.29599e+06	1.49191e+06	140945	232790	4.77377e+06	5.99393e+06	9.46363e+06	2.68625e+06	5.72576e+06	2.62138e+06	347763	9.36213e+06	6.24678e+06	91224.6	167523	482281	176465	167875	42422.8	113921	25207	2.57418e+07	320486	1.92183e+07
CS25060	265 D1 d21	paclitaxel d21	265	OvC5		1.13879e+08	926212	7.01641e+07	215247	2.93308e+08	19840.2	2.90279e+06	1.11717e+06	884623	9.98235e+08	1.18961e+06	97055.2	244432	5.6873e+07	261195	42114.2	2.42691e+07	1.20163e+06	174468	1.90314e+08	1.16748e+06	1.26141e+06	131736	214717	7.60535e+06	5.906e+06	1.36628e+07	3.89336e+06	6.05868e+06	54330.2	324070	9.92947e+06	6.31651e+06	92515.8	156110	488401	164443	176924	49537.4	125331	31405.3	2.61348e+07	275089	2.00925e+07
CS25061	265 D2 d21	paclitaxel d21	265	OvC5		9.71141e+07	1.2685e+06	6.43136e+07	215407	2.97284e+08	40218.3	1.97095e+06	961253	839740	9.79702e+08	1.04093e+06	90347.8	259187	5.39624e+07	275403	39393.4	2.86732e+07	1.01503e+06	131516	1.63555e+08	1.67668e+06	1.16105e+06	142849	241077	5.82407e+06	5.6311e+06	1.16458e+07	3.75946e+06	6.99804e+06	5.86481e+06	329488	9.5566e+06	7.08117e+06	90807	158719	570206	167192	158525	39287.9	125694	30719.5	2.98823e+07	194197	2.34627e+07
CS25062	265 E1 d14	carboplatin + paclitaxel d14	265	OvC5		1.63635e+08	821185	7.60365e+07	230533	3.15395e+08	22228.5	2.99258e+06	1.78116e+06	1.24926e+06	1.01354e+09	2.37187e+06	96765.7	256153	6.72206e+07	297498	43197.6	1.81499e+07	1.40114e+06	170790	2.53265e+08	2.55934e+06	1.71805e+06	144359	240550	9.99188e+06	6.01331e+06	1.85259e+07	3.01082e+06	8.21974e+06	54812.7	344407	9.68657e+06	1.44783e+06	95821	165906	528877	174763	179064	120922	118452	29548.3	9.93656e+06	364909	5.77767e+06
CS25063	265 E2 d14	carboplatin + paclitaxel d14	265	OvC5		2.00314e+08	490015	7.01701e+07	221374	3.10346e+08	19750.7	3.20771e+06	1.60236e+06	1.11704e+06	1.05247e+09	2.20553e+06	91198.4	260576	6.55099e+07	295419	40171.9	1.2683e+07	1.31085e+06	144756	2.21209e+08	1.5914e+06	1.54391e+06	130453	237739	9.58718e+06	4.87172e+06	1.84375e+07	2.63521e+06	7.94196e+06	207227	323594	8.29066e+06	1.03969e+06	95211	155880	476719	164201	156386	116984	108046	31960.5	6.86217e+06	345849	4.51467e+06
CS25064	265 E1 d21	carboplatin + paclitaxel d21	265	OvC5		1.90356e+08	173378	7.5565e+07	212349	3.29108e+08	20745.7	4.94156e+06	2.61334e+06	837673	1.04564e+09	1.4672e+06	94853.9	278155	6.20247e+07	271015	41188.9	9.48641e+06	1.81176e+06	174902	2.65079e+08	799676	1.23209e+06	132701	238751	1.21857e+07	6.37535e+06	2.3186e+07	4.26847e+06	8.47221e+06	41475.1	351765	1.01164e+07	211698	94864.4	169450	447828	178496	161750	62952.2	141159	36131.6	1.00037e+06	222680	464616
CS25065	265 E2 d21	carboplatin + paclitaxel d21	265	OvC5		9.78809e+07	265925	6.69588e+07	206361	2.56499e+08	19090.2	5.00323e+06	2.14963e+06	762029	8.6391e+08	1.06557e+06	103811	254671	4.76366e+07	286228	42185	7.26924e+06	1.49447e+06	159180	2.44907e+08	556830	1.16238e+06	145780	245339	1.03203e+07	5.13324e+06	2.18447e+07	3.6926e+06	8.56609e+06	77278.2	340855	8.22085e+06	91419.4	97888.1	164195	522530	172960	163159	39361.6	136804	34212.6	1.17672e+06	221319	370106
CS25066	268 B1 d14	untreated d14	268	OvC1		700849	523259	6.8651e+07	206864	323139	83840.7	1.7469e+06	886512	686896	1.23051e+06	538028	104101	264408	1.00547e+06	275298	43680.8	3.55598e+07	623488	115660	1.03516e+08	837869	602179	125672	244633	5.28739e+06	6.3046e+06	9.19604e+06	4.93167e+06	6.65531e+06	6.7417e+06	353357	9.78712e+06	28750.7	93114.1	172923	396234	182154	172838	81559.8	128392	27209.2	426516	173754	247417
CS25067	268 B2 d14	untreated d14	268	OvC1		657272	365305	6.52082e+07	225381	536585	61723.2	1.81122e+06	799052	603100	1.83975e+06	463647	108122	246345	973037	293386	39997.6	2.51565e+07	661886	115847	1.00972e+08	809394	577927	124784	254474	6.63716e+06	5.50733e+06	1.16442e+07	3.73345e+06	6.89915e+06	4.92795e+06	340496	8.59715e+06	27056.5	96011.3	166506	431154	175394	168827	68427.3	140301	24962	366322	143331	138004
CS25068	268 B1 d21	untreated d21	268	OvC1		551274	708430	6.88238e+07	234988	297062	131302	1.92219e+06	1.18076e+06	799003	1.09287e+06	496831	100111	294535	832698	317463	42044.2	3.56255e+07	735237	118008	1.18869e+08	906793	691485	128389	241941	5.9454e+06	6.0998e+06	4.17313e+06	4.01722e+06	7.64801e+06	5.37504e+06	344262	9.97006e+06	26745	91518.3	170655	445320	179765	188607	29032.2	118299	27430	972683	180346	141032
CS25069	268 B2 d21	untreated d21	268	OvC1		688677	318384	6.87691e+07	227175	291479	98090.5	2.66368e+06	1.31895e+06	749867	960768	573024	107509	247858	1.0161e+06	309798	41480.8	2.98507e+07	807816	126926	1.24697e+08	834730	624314	152078	254830	6.94665e+06	6.08024e+06	1.41664e+07	4.29739e+06	7.2667e+06	3.72436e+06	357180	1.02435e+07	27265.8	98851.9	175269	496503	184625	176370	95033.4	143773	28535.5	434473	152265	190736
CS25070	268 C1 d14	carboplatin d14	268	OvC1		747298	350631	6.78795e+07	220483	408628	89790.2	2.06383e+06	988307	588866	1.67373e+06	588285	105803	259734	980913	290808	42367.2	2.58054e+07	687011	127420	1.15352e+08	984951	582367	140172	246767	7.44317e+06	5.01857e+06	1.29394e+07	4.21595e+06	7.01644e+06	4.19137e+06	329497	8.10886e+06	27558.4	94518.3	161908	448062	170551	180124	93293.1	143678	29171	485741	86358.1	488035
CS25071	268 C2 d14	carboplatin d14	268	OvC1		743372	164038	6.72387e+07	208338	411496	58010.1	2.53296e+06	1.20143e+06	623141	1.71752e+06	662316	102298	247790	1.09575e+06	285971	41152.5	2.38291e+07	693813	119684	1.22113e+08	718271	582058	144583	224063	8.14648e+06	5.35242e+06	5.7131e+06	3.97366e+06	7.68928e+06	3.78946e+06	333604	8.55881e+06	28651.3	99903	162872	465927	171566	171264	42564.2	133902	27277.7	623517	112205	428527
CS25072	268 C1 d21	carboplatin d21	268	OvC1		710982	276465	7.05866e+07	213988	445134	112240	2.41173e+06	1.40075e+06	720871	1.65434e+06	758232	100282	243108	981495	239323	40334.9	2.29647e+07	814381	144439	1.30884e+08	719140	656151	134434	211251	7.47389e+06	5.70492e+06	1.39007e+07	4.15136e+06	8.35182e+06	5.27011e+06	392644	9.14031e+06	27639.8	93908.9	212889	469467	182852	169556	78111.5	136562	29901.1	802748	135522	131596
CS25073	268 C2 d21	carboplatin d21	268	OvC1		721407	176456	6.66408e+07	206881	296890	36937.4	2.94628e+06	1.32631e+06	709406	966030	632562	104454	275895	1.04793e+06	272412	39227.9	1.91129e+07	683669	142659	1.24027e+08	677392	582381	159823	233582	8.05176e+06	5.50875e+06	1.53679e+07	4.17608e+06	7.56381e+06	1.84146e+06	323206	8.69393e+06	27912.2	96670.1	157749	479827	166170	182065	62386.9	115209	29636.1	836468	156509	505839
CS25074	268 D1 d14	paclitaxel d14	268	OvC1		1.57043e+08	355013	7.88556e+07	215127	3.23841e+08	169727	3.60725e+06	1.97785e+06	769316	1.12685e+09	628220	102975	247092	6.25392e+07	284973	45456	3.4855e+07	820773	141274	1.20943e+08	1.21843e+06	709404	139576	238986	9.26297e+06	6.67721e+06	1.66982e+07	4.33901e+06	8.20979e+06	3.04229e+06	367914	1.05585e+07	6.6108e+06	98159.8	181208	456403	190881	172068	45394.7	126563	27903.1	3.81794e+07	136677	2.78511e+07
CS25075	268 D2 d14	paclitaxel d14	268	OvC1		4.74292e+08	232817	7.02184e+07	214813	3.7009e+08	150680	3.19404e+06	1.54297e+06	713610	1.16944e+09	537801	100737	275268	8.09691e+07	285924	41637.2	3.01265e+07	727998	111694	1.04323e+08	1.31662e+06	538395	132047	235396	8.30958e+06	5.68668e+06	1.48069e+07	3.89384e+06	9.18535e+06	3.17668e+06	371643	9.19759e+06	9.34414e+06	86074.2	182310	462860	192042	180574	40559.2	123382	29369.7	3.82018e+07	133225	2.92408e+07
CS25076	268 D1 d21	paclitaxel d21	268	OvC1		6.1073e+07	85783.3	6.68344e+07	219358	1.30021e+08	132483	2.90173e+06	1.59936e+06	686106	4.48562e+08	526658	101782	261667	2.60375e+07	273009	40706.1	2.72697e+07	638171	123078	1.17869e+08	851891	677900	153163	235441	8.62737e+06	5.77778e+06	1.58109e+07	3.97925e+06	7.86757e+06	2.49382e+06	322591	9.45547e+06	4.33635e+06	96731.5	157938	484865	166369	173430	41899.6	101831	32706.2	1.87027e+07	158469	1.3992e+07
CS25077	268 D2 d21	paclitaxel d21	268	OvC1		8.06352e+07	154036	6.52291e+07	212111	1.8439e+08	229095	3.12638e+06	1.62182e+06	664861	6.21051e+08	589732	97911.1	272271	3.94512e+07	260524	40414.6	2.53681e+07	730276	134979	1.10644e+08	994385	531165	123659	218481	8.68027e+06	5.85853e+06	1.38632e+07	3.80136e+06	7.90432e+06	2.851e+06	336926	9.24413e+06	6.65469e+06	88616.3	164278	423696	173048	161901	32097.5	137943	30446.8	2.8457e+07	148364	2.18676e+07
CS25078	268 E1 d14	carboplatin + paclitaxel d14	268	OvC1		1.51981e+08	159761	7.45241e+07	196953	3.25146e+08	161725	3.64493e+06	1.74999e+06	732828	1.07103e+09	698626	97245.4	229365	7.10075e+07	275256	42521	2.8444e+07	805555	134131	1.13812e+08	1.1681e+06	606003	130772	224327	9.06002e+06	5.65118e+06	1.60916e+07	4.27996e+06	7.93251e+06	2.40785e+06	330783	9.17844e+06	7.96509e+06	92673.1	161708	430487	170341	177024	43526.6	127323	30452.5	3.30755e+07	125518	2.50151e+07
CS25079	268 E2 d14	carboplatin + paclitaxel d14	268	OvC1		1.04396e+08	153738	7.22152e+07	223655	2.87383e+08	92096.2	4.16469e+06	1.87555e+06	638826	9.90037e+08	701005	99549.4	264619	5.52216e+07	299080	41956.6	2.19055e+07	844997	147142	1.13627e+08	816160	658738	130862	244992	9.68741e+06	5.09971e+06	1.77677e+07	3.94069e+06	8.90417e+06	1.09925e+06	359260	8.24063e+06	4.3465e+06	94299	176752	440688	186187	168837	45052.1	127060	28988.5	1.97119e+07	92530.6	1.47121e+07
CS25080	268 E1 d21	carboplatin + paclitaxel d21	268	OvC1		6.83133e+07	163319	6.57249e+07	224616	1.97569e+08	165068	2.77391e+06	1.27805e+06	633124	6.78213e+08	635431	94937.1	228722	3.55467e+07	278486	41649.9	2.1606e+07	681633	120843	1.18759e+08	798004	594519	135020	241831	8.87708e+06	4.91242e+06	1.55184e+07	3.44681e+06	8.25681e+06	1.72313e+06	329478	8.09751e+06	4.80244e+06	92406.7	163245	434533	171959	165626	19058	122641	33399.6	2.21294e+07	108892	1.6525e+07
CS25081	268 E2 d21	carboplatin + paclitaxel d21	268	OvC1		1.06844e+08	129328	6.99469e+07	215919	2.21886e+08	129817	3.7455e+06	1.62892e+06	687995	7.90255e+08	582480	104953	242856	5.02061e+07	308082	42209.2	1.80521e+07	811400	131738	1.21137e+08	760419	525259	117634	241891	1.03363e+07	4.94399e+06	1.95617e+07	3.83398e+06	9.22082e+06	58785.3	356668	8.43373e+06	4.58447e+06	96901.5	175395	404169	184758	166596	25003.9	124591	28584.6	2.02074e+07	104368	1.49531e+07
CS25082	279 B1 d14	untreated d14	279	OvC9		590295	4.57665e+06	6.79321e+07	223594	269037	252085	1.25956e+06	732032	725526	1.06954e+06	1.33972e+06	108181	290105	886344	297432	44866.7	3.29447e+07	1.11725e+06	110083	1.94168e+08	1.11732e+06	713592	121184	262055	3.06926e+06	6.27142e+06	6.77961e+06	5.19963e+06	4.1541e+06	5.42559e+06	340836	1.06827e+07	27822.9	92202.4	167924	359847	176888	164912	23074.1	109198	22549.7	315914	90488.4	200600
CS25083	279 B2 d14	untreated d14	279	OvC9		606017	3.27987e+06	5.61479e+07	217890	509452	91703.4	503811	437786	547305	2.22297e+06	2.61756e+06	104627	248575	899552	325297	41048.9	4.00513e+07	602442	149842	9.29302e+07	3.00299e+06	1.63495e+06	171361	226697	1.53114e+06	5.69334e+06	1.69792e+06	4.46167e+06	1.72522e+06	5.30134e+06	338555	8.9155e+06	26821.7	97905.2	166721	533878	175621	168010	69255.6	126243	21838.6	348873	73816.9	142793
CS25084	279 B1 d21	untreated d21	279	OvC9		602423	2.71006e+06	7.1105e+07	237644	513902	261341	2.09182e+06	1.00401e+06	861828	1.43449e+06	805511	99399.5	263396	886319	301973	44130.7	2.41284e+07	1.50861e+06	99184.5	2.63095e+08	1.82534e+06	576337	154204	264127	6.88104e+06	6.57984e+06	1.14002e+07	5.42291e+06	7.81365e+06	1.55001e+06	337258	1.06961e+07	27633.5	92299.7	166187	487361	175059	170059	52058.2	131001	28658.7	755967	164720	208888
CS25085	279 B2 d21	untreated d21	279	OvC9		645805	369314	6.5527e+07	204321	734688	19102	3.58275e+06	1.59029e+06	767766	2.76017e+06	695666	100257	245906	951076	259993	42359.6	1.50869e+07	1.56162e+06	156162	2.60293e+08	875246	639074	146541	217486	9.6081e+06	5.87784e+06	1.74335e+07	4.36719e+06	6.61862e+06	405070	334187	9.55281e+06	28162.8	97461.8	160879	479482	169467	173218	80781.9	140217	32044.6	688760	209328	476615
CS25086	279 C1 d14	carboplatin d14	279	OvC9		617118	3.68363e+06	6.42486e+07	235304	269252	449808	606527	494216	684511	887526	1.81036e+06	95350.2	283487	897619	295140	41878.9	4.55044e+07	1.124e+06	133332	1.79721e+08	3.5308e+06	1.00593e+06	134195	243274	2.81369e+06	6.1166e+06	5.4536e+06	5.77533e+06	2.89349e+06	1.1128e+07	335993	9.65063e+06	28844.3	90311.7	164897	426771	173700	190009	89638.8	100469	24254.2	1.22881e+06	128310	134972
CS25087	279 C2 d14	carboplatin d14	279	OvC9		622120	3.52824e+06	6.47028e+07	219754	246530	449435	776211	568435	670199	796895	1.93676e+06	110954	280384	944115	280895	40159.3	3.96913e+07	1.07622e+06	146824	1.80356e+08	3.43604e+06	805920	146439	271089	3.03818e+06	5.65952e+06	5.6726e+06	5.29554e+06	3.55855e+06	7.75583e+06	347232	9.06493e+06	27874.6	96793	157948	443200	166380	174645	74288	114335	23447.6	381750	81278.9	240443
CS25088	279 C1 d21	carboplatin d21	279	OvC9		617200	1.42512e+06	7.62316e+07	253824	250997	124802	2.61503e+06	1.2973e+06	794125	897676	1.25823e+06	105476	257116	919761	279812	44085	2.24229e+07	1.55473e+06	153879	2.92854e+08	1.86429e+06	538906	134472	242572	9.22236e+06	5.51679e+06	1.60181e+07	5.66388e+06	8.00019e+06	2.18578e+06	318418	9.35618e+06	26356	92735.5	156978	456818	165358	182113	220120	127597	29979.3	320842	132645	217600
CS25089	279 C2 d21	carboplatin d21	279	OvC9		559890	861160	6.71611e+07	231935	267788	65033.8	2.80384e+06	1.38383e+06	714289	906643	1.38687e+06	100588	293942	851229	330074	43356.6	2.02939e+07	1.74607e+06	135728	2.73033e+08	1.63199e+06	502145	137677	272027	9.24647e+06	5.37078e+06	1.63378e+07	4.82084e+06	7.05501e+06	42400.6	346034	8.53608e+06	27198.7	95797.9	171279	537696	180423	176368	176285	132237	33533.8	879294	138748	603524
CS25090	279 D1 d14	paclitaxel d14	279	OvC9		1.22779e+08	4.45116e+06	7.17229e+07	208376	3.51277e+08	2.47826e+06	790309	670724	812610	1.10478e+09	2.63276e+06	101130	287311	6.02662e+07	279791	42560	5.93141e+07	1.04778e+06	132615	1.61728e+08	2.326e+06	1.29357e+06	133027	268352	2.09689e+06	7.47942e+06	3.9856e+06	6.10101e+06	2.58471e+06	5.92555e+06	364286	1.23457e+07	1.26968e+07	88895.3	174645	524372	183968	185473	29229.5	102653	23203.3	5.12203e+07	120943	3.92935e+07
CS25091	279 D2 d14	paclitaxel d14	279	OvC9		6.76402e+07	3.39788e+06	6.6749e+07	205848	3.02308e+08	2.10544e+06	1.025e+06	627293	734239	9.65648e+08	1.47697e+06	111458	246476	5.43361e+07	276486	41886.6	4.47451e+07	1.1206e+06	151979	1.73015e+08	1.73966e+06	924972	152043	232215	2.67735e+06	6.79058e+06	5.41109e+06	4.75007e+06	3.09319e+06	2.83308e+06	367333	1.09807e+07	9.11968e+06	97870.4	179156	537219	188720	178059	45140.1	114045	19472.3	3.76805e+07	141979	2.92053e+07
CS25092	279 D1 d21	paclitaxel d21	279	OvC9		1.78051e+08	2.01555e+06	7.76031e+07	209084	3.90882e+08	326536	2.28107e+06	1.62379e+06	931073	1.19653e+09	1.01211e+06	88455.9	255507	9.38442e+07	295721	41576.4	2.79692e+07	1.82054e+06	212876	2.7938e+08	1.94749e+06	599891	129976	235711	7.58287e+06	7.2941e+06	1.41678e+07	5.53289e+06	8.71039e+06	785777	336652	1.11855e+07	5.85076e+06	96489.1	164675	448574	173465	161448	211651	66320.4	29745.7	2.41572e+07	187965	1.8408e+07
CS25093	279 D2 d21	paclitaxel d21	279	OvC9		1.08239e+08	2.73685e+06	7.02317e+07	218579	3.3529e+08	1.45914e+06	1.4854e+06	1.11568e+06	816271	1.10706e+09	1.17617e+06	99528.4	270170	6.70519e+07	312064	42466.4	3.27504e+07	1.37586e+06	140518	2.25117e+08	1.77579e+06	580346	135040	273652	4.75128e+06	6.31945e+06	9.74477e+06	4.93796e+06	6.3451e+06	2.11163e+06	367238	1.02295e+07	9.52072e+06	91251.9	181539	540574	191230	179449	135748	117184	24688.1	3.78076e+07	150619	2.89776e+07
CS25094	279 E1 d14	carboplatin + paclitaxel d14	279	OvC9		7.77787e+07	3.14502e+06	6.63368e+07	228035	3.18385e+08	631182	793163	668001	705970	1.0277e+09	1.82786e+06	94435	262279	5.1879e+07	294466	44878.9	4.16378e+07	1.15493e+06	117290	1.78631e+08	3.84549e+06	827196	134344	228488	3.6953e+06	5.70042e+06	2.79504e+06	4.75909e+06	4.85716e+06	3.37105e+06	338178	9.10348e+06	1.18227e+07	93959.3	167473	455899	176413	173877	202117	104752	24141.5	4.49353e+07	84305.7	3.50001e+07
CS25095	279 E2 d14	carboplatin + paclitaxel d14	279	OvC9		6.71742e+07	2.72295e+06	6.63682e+07	213262	2.9508e+08	566546	757526	630727	666338	9.70116e+08	1.6021e+06	98039.7	295093	4.66825e+07	294761	43601.1	3.60031e+07	1.19271e+06	146607	1.84283e+08	3.67174e+06	764905	160276	256913	4.1059e+06	5.30862e+06	7.02658e+06	4.62493e+06	4.36691e+06	1.92848e+06	362898	8.86642e+06	1.17242e+07	96577.2	179510	578072	189093	176958	258728	123531	26921	4.51393e+07	102994	3.49273e+07
CS25096	279 E1 d21	carboplatin + paclitaxel d21	279	OvC9		1.82616e+08	176850	7.62335e+07	218532	3.55554e+08	19879.3	4.41915e+06	3.24138e+06	955989	1.14515e+09	870455	97943.1	252061	8.37478e+07	271072	40339	1.36682e+07	1.96511e+06	174539	2.83509e+08	1.03965e+06	409853	124903	243332	1.18506e+07	6.2669e+06	2.09567e+07	5.20204e+06	9.00511e+06	272812	376254	9.84937e+06	638965	87470.9	184019	421134	193843	164496	157217	120423	34330.6	4.27812e+06	211232	3.07437e+06
CS25097	279 E2 d21	carboplatin + paclitaxel d21	279	OvC9		1.18035e+08	206130	6.12132e+07	232143	2.75266e+08	26248.6	3.0792e+06	1.75288e+06	710634	9.14473e+08	738744	95573.6	270955	6.26923e+07	285659	37871	1.04727e+07	1.46864e+06	125245	2.23733e+08	1.1189e+06	385309	124902	233797	8.93552e+06	4.76003e+06	1.65148e+07	4.01485e+06	6.79174e+06	171217	344971	7.8174e+06	696014	92704.2	168299	419496	177283	169148	138301	134876	32635.8	3.87296e+06	167717	2.83625e+06
CS25098	281 B1 d14	untreated d14	281	OvC4		564566	1.91357e+06	6.83473e+07	203975	416725	38537.9	3.17528e+06	1.35156e+06	831189	1.56193e+06	668725	104138	260188	884458	272493	39328.2	3.83841e+07	884484	157004	1.45859e+08	903596	420287	152368	222957	4.56013e+06	6.38647e+06	8.9894e+06	5.03331e+06	5.33649e+06	1.86415e+06	345726	1.00343e+07	29057.4	90926.2	166542	564797	175432	172616	111336	129789	27688.2	788613	332156	629230
CS25099	281 B2 d14	untreated d14	281	OvC4		589555	1.27455e+06	6.74557e+07	207019	249547	57970.3	2.60963e+06	1.19472e+06	754008	967873	557128	97658	234738	892780	273691	39209	3.66336e+07	864480	172884	1.45901e+08	1.03331e+06	350940	147092	224171	5.23344e+06	5.59104e+06	9.81768e+06	4.22582e+06	4.84172e+06	2.47232e+06	325156	9.11499e+06	29343.6	94870.6	156633	473307	164994	170968	103399	123480	28037.9	378253	278190	116130
CS25100	281 B1 d21	untreated d21	281	OvC4		599681	845435	6.69921e+07	217617	285247	55183.6	2.52923e+06	1.4579e+06	780499	860917	2.11367e+06	98092.3	274872	844712	303653	39356.7	3.12593e+07	1.35171e+06	134853	2.46392e+08	762470	2.26242e+06	124964	262303	5.74539e+06	5.61483e+06	1.30586e+07	4.40835e+06	5.39445e+06	1.2618e+06	497864	9.54941e+06	34224.6	91479.9	160423	512701	168987	161714	95713	145729	32465.7	1.02951e+06	352408	162954
CS25101	281 B2 d21	untreated d21	281	OvC4		621340	1.23153e+06	6.57173e+07	211891	248327	39616.2	3.60107e+06	1.48916e+06	863609	836682	2.17569e+06	102851	277684	954772	282502	39136.3	2.85824e+07	1.34225e+06	148576	2.52943e+08	1.29102e+06	1.92297e+06	125057	248814	6.03099e+06	5.69739e+06	1.09321e+07	4.72452e+06	5.63637e+06	2.42196e+06	479722	9.24429e+06	28911.3	92562.3	162413	521004	171083	176070	70272.6	145499	31885.3	975615	408219	518435
CS25102	281 C1 d14	carboplatin d14	281	OvC4		599763	2.49086e+06	7.00463e+07	224940	271172	23247.1	2.26775e+06	1.24087e+06	724832	864475	1.97148e+06	99121	271051	920858	278161	41203.6	3.81751e+07	1.11179e+06	176205	2.00313e+08	1.58418e+06	1.46091e+06	124676	244243	5.11933e+06	5.81465e+06	9.12707e+06	5.06288e+06	5.91011e+06	2.38533e+06	338307	9.18701e+06	28992.9	93327.4	162967	461737	171667	182004	73436.1	116926	27476	418882	324036	160091
CS25103	281 C2 d14	carboplatin d14	281	OvC4		570551	260210	6.89508e+07	230785	444868	71280.8	4.28451e+06	2.12619e+06	665102	1.61519e+06	1.668e+06	102748	253037	854815	298786	39673.4	2.63338e+07	1.23817e+06	142476	2.1192e+08	777534	1.32322e+06	156468	232425	8.41268e+06	5.67659e+06	1.31661e+07	4.76253e+06	7.79603e+06	1.4002e+06	324113	8.98782e+06	31248.5	90715.2	156130	528949	164464	166278	55211.3	136897	31823.6	807379	325269	529595
CS25104	281 C1 d21	carboplatin d21	281	OvC4		591317	370535	6.95388e+07	215430	244059	72433.3	4.3424e+06	1.62527e+06	781349	1.12013e+06	2.56987e+06	97362.1	270199	900595	267644	41672.8	1.8518e+07	1.45418e+06	170448	2.74248e+08	922051	2.37966e+06	140926	244239	8.09516e+06	5.12516e+06	1.5454e+07	4.62813e+06	6.54474e+06	1.09902e+06	331094	8.28067e+06	30396.9	99112.1	159493	522338	168007	175151	41992	136683	33726.2	796855	373124	559151
CS25105	281 C2 d21	carboplatin d21	281	OvC4		574518	159786	6.60329e+07	232161	499665	104856	3.89769e+06	1.5932e+06	719609	1.78579e+06	1.99885e+06	104644	274735	841156	293618	41425.4	1.86464e+07	1.49753e+06	140351	2.5281e+08	725899	2.2808e+06	133296	256030	8.92848e+06	5.22629e+06	1.63974e+07	4.57802e+06	6.98237e+06	56409.8	343055	8.0985e+06	23045	94493	165255	470373	174076	175139	67125.9	139919	34286.6	1.06247e+06	366810	709478
CS25106	281 D1 d14	paclitaxel d14	281	OvC4		9.22219e+07	338590	7.04077e+07	222461	2.52319e+08	132623	3.18537e+06	2.33388e+06	917848	8.71383e+08	1.5127e+06	84440.9	269111	5.57908e+07	289039	41530.8	3.73871e+07	1.28065e+06	129618	2.16904e+08	1.0787e+06	1.54831e+06	138699	244100	7.17343e+06	6.45618e+06	1.31417e+07	5.16941e+06	7.46788e+06	67456.7	352012	1.02765e+07	3.7084e+06	94938.4	169570	527131	178622	182621	107454	124555	31585.3	1.54396e+07	407358	1.15801e+07
CS25107	281 D2 d14	paclitaxel d14	281	OvC4		1.03779e+08	257145	7.24762e+07	234251	2.84781e+08	152253	4.05493e+06	2.0518e+06	905991	9.40612e+08	1.39576e+06	94662.4	277207	5.30981e+07	271513	43134.2	3.4295e+07	1.22581e+06	131986	2.11681e+08	1.04112e+06	1.40396e+06	108306	251134	7.73813e+06	6.0414e+06	1.65489e+07	4.6618e+06	8.42357e+06	1.29355e+06	367426	9.77036e+06	5.89263e+06	89659.8	176995	359353	186443	175789	102679	127020	29467.4	2.18005e+07	449556	1.61375e+07
CS25108	281 D1 d21	paclitaxel d21	281	OvC4		1.3796e+08	231271	6.90901e+07	233511	2.75563e+08	243809	4.12738e+06	1.78336e+06	855735	9.43349e+08	2.26251e+06	91610.8	236231	5.68695e+07	277858	41480	2.78145e+07	1.58009e+06	150248	2.39786e+08	1.09101e+06	2.31485e+06	143159	220210	7.88717e+06	5.37424e+06	1.58776e+07	4.19422e+06	7.6883e+06	1.03788e+06	336285	8.61114e+06	4.08014e+06	89122.6	161993	476572	170641	175858	77961	114352	30565.5	1.8986e+07	447694	1.35407e+07
CS25109	281 D2 d21	paclitaxel d21	281	OvC4		6.05202e+07	299658	6.62677e+07	220102	2.55403e+08	284975	4.92115e+06	1.59379e+06	863585	8.89557e+08	2.15298e+06	90994.7	243176	4.74729e+07	281932	37783.5	2.58054e+07	1.28527e+06	130916	2.22544e+08	1.21358e+06	2.34547e+06	129099	223791	7.69506e+06	5.13123e+06	6.14786e+06	4.06917e+06	6.91943e+06	1.16352e+06	336089	7.96413e+06	5.17577e+06	93525.4	161899	466696	170542	173003	72134.4	105624	32511.2	2.09703e+07	435418	1.58457e+07
CS25110	281 E1 d14	carboplatin + paclitaxel d14	281	OvC4		9.81167e+07	302390	7.26829e+07	213449	2.70389e+08	75260.6	4.59623e+06	2.33497e+06	838707	9.62491e+08	1.95739e+06	95746.5	257291	5.42655e+07	286861	41607.5	2.96436e+07	1.22851e+06	162019	2.08567e+08	1.21941e+06	1.40798e+06	131931	226495	8.69079e+06	5.35861e+06	1.44267e+07	4.49291e+06	7.94687e+06	700878	333042	8.79662e+06	4.23437e+06	91597.3	160431	467936	168996	162885	89768	107494	29620.4	1.83566e+07	349558	1.33936e+07
CS25111	281 E2 d14	carboplatin + paclitaxel d14	281	OvC4		7.06492e+07	678193	6.69342e+07	237055	2.48262e+08	74487.4	3.55992e+06	1.74958e+06	794057	8.18257e+08	1.60541e+06	103330	279151	5.27542e+07	287439	41713.1	2.40812e+07	1.18327e+06	122976	1.86921e+08	1.09754e+06	1.25317e+06	147195	251369	8.05131e+06	5.04793e+06	1.47027e+07	4.47287e+06	6.99978e+06	371146	352896	8.1253e+06	2.0386e+06	92336.5	169995	522621	179070	178015	186605	145996	31797.3	9.64545e+06	354561	6.42865e+06
CS25112	281 E1 d21	carboplatin + paclitaxel d21	281	OvC4		1.32281e+08	162702	6.78069e+07	202271	2.99696e+08	105760	4.37335e+06	2.0738e+06	833608	1.02288e+09	2.64884e+06	97535.7	259559	5.62759e+07	287694	40977.1	1.7209e+07	1.32669e+06	136860	2.29508e+08	965753	2.20737e+06	155044	249262	9.39626e+06	4.96143e+06	1.78363e+07	4.52473e+06	7.44521e+06	437639	348713	8.01929e+06	4.28384e+06	91384.7	167980	549248	176947	169210	72291.1	130263	29657.7	1.82855e+07	376354	1.36558e+07
CS25113	281 E2 d21	carboplatin + paclitaxel d21	281	OvC4		6.52936e+07	136163	5.85049e+07	228663	2.41633e+08	98932.8	3.81491e+06	1.5415e+06	733730	8.43335e+08	2.37818e+06	94440.1	269586	4.87301e+07	278124	38684.6	9.68614e+06	1.15777e+06	115006	1.96314e+08	674038	1.92553e+06	141593	240756	7.51645e+06	4.41485e+06	1.72125e+07	3.59598e+06	7.67284e+06	209089	334535	7.01196e+06	1.29985e+06	93947.9	161150	459551	169753	170913	61569.6	147472	33436.4	7.42691e+06	315623	5.43146e+06
CS25114	282 B1 d14	untreated d14	282	OvC2		740998	1.18804e+06	7.85063e+07	211073	390266	47706.7	3.48603e+06	2.11638e+06	926746	1.35683e+06	800256	94079.1	250705	955641	278091	43540.6	4.77101e+07	1.14314e+06	163490	1.86534e+08	1.10354e+06	453126	133131	227654	5.83811e+06	7.47938e+06	1.12675e+07	6.08667e+06	6.37146e+06	1.51657e+06	332698	1.21422e+07	29092.9	94526	162194	432911	170852	182633	88493.7	76646.3	27556.7	271741	405670	191810
CS25115	282 B2 d14	untreated d14	282	OvC2		685999	249712	6.83763e+07	225613	244892	18972.7	3.78548e+06	2.25177e+06	692086	886000	544242	102791	264099	984782	273426	40516.2	3.54764e+07	973571	154161	1.63742e+08	812405	297677	135894	227861	7.17656e+06	6.33798e+06	1.43498e+07	4.77984e+06	7.62602e+06	746698	327268	9.86752e+06	26660.6	94089	160132	509437	168680	175949	92414.7	125742	31683	775412	393356	131707
CS25116	282 B1 d21	untreated d21	282	OvC2		689320	751584	7.2775e+07	220958	280380	44585	2.60798e+06	2.14371e+06	957372	975558	2.58727e+06	99532.3	256418	999965	278748	38482.9	3.66833e+07	1.61794e+06	165340	2.70911e+08	814013	1.98353e+06	115758	219022	5.80056e+06	6.14626e+06	1.01256e+07	5.41725e+06	6.48389e+06	1.85432e+06	320113	9.98587e+06	28465.5	90053.9	156262	401956	164604	184448	76293.3	127700	27895.1	381185	445081	170441
CS25117	282 B2 d21	untreated d21	282	OvC2		550943	196098	6.99074e+07	210300	358105	49464.5	4.05258e+06	2.19738e+06	843221	951777	1.94778e+06	93862.3	246478	826723	270504	40747.4	2.8291e+07	1.43264e+06	124706	2.68559e+08	719056	2.25005e+06	138741	252525	8.04032e+06	5.91021e+06	1.39894e+07	4.66555e+06	7.87486e+06	1.78061e+06	314972	9.58112e+06	24400.3	92909.3	156110	497511	164443	179105	61707.3	115551	32892.5	414534	387679	602644
CS25118	282 C1 d14	carboplatin d14	282	OvC2		624720	178657	7.87722e+07	216543	300632	21318.8	4.8872e+06	3.04896e+06	822690	943249	1.98129e+06	109221	292049	938656	281233	42958.9	2.44396e+07	1.62068e+06	157220	2.50558e+08	899257	1.26699e+06	129920	260514	1.07651e+07	5.8591e+06	1.75141e+07	5.24606e+06	9.02843e+06	46015.6	341394	9.51436e+06	26159.2	94173	168438	436650	177430	171231	71404.1	134841	30549.2	821674	387066	206404
CS25119	282 C2 d14	carboplatin d14	282	OvC2		577858	518471	6.97075e+07	240588	328765	38136.7	3.4882e+06	1.91899e+06	696995	1.13018e+06	1.70545e+06	96687.1	260662	866046	306338	42537.3	2.7817e+07	1.17363e+06	118633	2.17037e+08	953188	1.20799e+06	118227	251908	7.83813e+06	5.20621e+06	1.42508e+07	4.72174e+06	7.9636e+06	38240.8	356937	8.45335e+06	27051.1	94388.8	160339	399165	168898	168013	110678	145003	31004.9	1.32236e+06	255862	546264
CS25120	282 C1 d21	carboplatin d21	282	OvC2		730202	134814	7.87854e+07	226871	422646	30510	5.82061e+06	3.37053e+06	922254	1.45881e+06	3.09139e+06	93044.6	284770	1.03982e+06	283794	40571.3	2.2695e+07	1.79127e+06	160774	3.09848e+08	869588	2.79339e+06	131876	223186	1.02206e+07	6.0905e+06	1.90201e+07	5.23367e+06	7.81443e+06	295549	327169	9.84857e+06	29704.2	88163.1	159591	479617	168110	170019	38244.4	133841	34673.8	457095	409392	194535
CS25121	282 C2 d21	carboplatin d21	282	OvC2		642110	261263	6.28287e+07	227365	409499	18293.1	4.05609e+06	2.17196e+06	716786	1.66586e+06	2.48342e+06	98951.2	243166	939819	279384	41672.6	2.29391e+07	1.48495e+06	140638	2.39724e+08	780211	2.31562e+06	139005	228403	8.98455e+06	5.15258e+06	1.50274e+07	4.93588e+06	7.4757e+06	1.36483e+06	338378	8.05557e+06	27987.8	95185.3	166093	530626	174960	189956	82813.8	154651	33496.5	698126	408311	128181
CS25122	282 D1 d14	paclitaxel d14	282	OvC2		1.41583e+08	239997	7.23466e+07	237464	2.91418e+08	83040.9	3.32128e+06	2.55359e+06	874689	9.93265e+08	1.42831e+06	104489	263520	7.17965e+07	299923	43194.6	2.64255e+07	1.3523e+06	157266	2.02779e+08	1.25687e+06	1.50965e+06	123255	240163	8.74266e+06	5.6991e+06	1.67306e+07	4.88232e+06	7.94312e+06	55827	334728	9.61866e+06	4.00742e+06	90033.9	164631	390587	173420	178655	105732	133497	30006.6	1.8229e+07	460718	1.38714e+07
CS25123	282 D2 d14	paclitaxel d14	282	OvC2		1.39526e+08	177663	7.84128e+07	214482	3.13967e+08	67099.1	3.55532e+06	2.47868e+06	947310	1.06114e+09	1.50726e+06	89026.7	272589	7.03982e+07	304659	41095.1	2.39261e+07	1.39535e+06	165081	2.19346e+08	1.37743e+06	1.47963e+06	116211	242780	8.30868e+06	6.23948e+06	1.41316e+07	5.41648e+06	7.8608e+06	1.81322e+06	358895	1.01229e+07	3.16547e+06	91148.8	176905	469698	186348	168586	86901.3	104299	33563.4	1.49383e+07	428948	1.08846e+07
CS25124	282 D1 d21	paclitaxel d21	282	OvC2		1.81333e+08	239590	7.08382e+07	239232	2.76651e+08	85484.8	4.18917e+06	2.06327e+06	907865	9.68531e+08	2.13144e+06	97267.6	268673	5.57523e+07	301404	43645.8	1.82293e+07	1.50589e+06	147536	2.40859e+08	1.06373e+06	2.49102e+06	136126	239854	9.96437e+06	5.4204e+06	1.68401e+07	4.76154e+06	8.75169e+06	867748	334627	8.42962e+06	3.96562e+06	96046.6	164454	465397	173233	172240	98888.4	125079	29690.9	1.94553e+07	417288	1.38803e+07
CS25125	282 D2 d21	paclitaxel d21	282	OvC2		9.1346e+07	265461	7.20682e+07	206413	2.77394e+08	49241.8	3.89829e+06	2.10861e+06	991531	9.49977e+08	2.36236e+06	101374	250862	5.3424e+07	255192	41602.6	1.91233e+07	1.58221e+06	123569	2.49516e+08	1.49872e+06	2.61275e+06	145555	229578	7.90891e+06	5.8845e+06	1.39807e+07	4.71287e+06	8.42676e+06	2.78698e+06	350450	9.20877e+06	5.1116e+06	90123.2	171222	486940	180362	174491	67029	120959	25257.3	2.13106e+07	423232	1.62769e+07
CS25126	282 E1 d14	carboplatin + paclitaxel d14	282	OvC2		1.05237e+08	158062	8.0913e+07	231446	2.73747e+08	80818.9	4.39654e+06	2.96626e+06	955733	9.21111e+08	2.01137e+06	91556.8	268166	5.73821e+07	277502	44914.3	2.54289e+07	1.36169e+06	152432	2.34064e+08	1.18977e+06	1.54923e+06	142552	256162	9.69862e+06	6.10728e+06	1.47305e+07	5.17543e+06	8.51453e+06	2.32415e+06	356499	9.49239e+06	3.65103e+06	92927.6	175975	509076	185369	170465	138003	128101	35195.2	1.69073e+07	393046	1.28459e+07
CS25127	282 E2 d14	carboplatin + paclitaxel d14	282	OvC2		8.43686e+07	675235	6.6192e+07	213106	2.77286e+08	25232.4	2.52253e+06	1.69914e+06	725598	8.5775e+08	1.5846e+06	94277.2	251895	5.75769e+07	280055	42361.1	2.45316e+07	1.14029e+06	144443	1.74864e+08	1.23511e+06	1.2208e+06	130139	239138	8.09389e+06	5.41778e+06	1.43122e+07	4.59239e+06	8.22663e+06	722896	331465	8.64369e+06	2.33918e+06	95141.6	162429	425235	171100	176310	117839	113015	30171.4	1.08686e+07	364544	8.34599e+06
CS25128	282 E1 d21	carboplatin + paclitaxel d21	282	OvC2		2.65535e+08	224693	7.75919e+07	206094	3.71137e+08	55094.9	4.64788e+06	3.2512e+06	979865	1.20953e+09	2.72241e+06	94619	254038	8.48035e+07	259300	40701.8	1.67983e+07	1.60314e+06	145609	2.65566e+08	927899	2.51932e+06	106430	215161	1.11357e+07	5.67944e+06	2.06779e+07	5.21152e+06	1.05644e+07	1.16493e+06	346005	9.39779e+06	2.89522e+06	86993.1	169275	322286	178311	167088	90256.8	118107	30034	1.28937e+07	448552	9.58311e+06
CS25129	282 E2 d21	carboplatin + paclitaxel d21	282	OvC2		1.22174e+08	199606	6.25866e+07	214095	2.64586e+08	18564.9	3.52192e+06	1.92457e+06	809377	9.41027e+08	2.35532e+06	100877	230914	5.49894e+07	302078	41732.9	1.14999e+07	1.24911e+06	108741	2.00751e+08	823031	2.23025e+06	145071	265174	8.60793e+06	4.62295e+06	1.63893e+07	3.98703e+06	8.12753e+06	368121	434527	7.61537e+06	1.7423e+06	101147	171367	514121	180514	180957	66262	141349	28630.5	8.74181e+06	376521	6.3971e+06
CS25130	283 B1 d14	untreated d14	283	OvC3		612557	861816	6.59637e+07	229874	348124	164517	3.55854e+06	1.5525e+06	765890	1.26707e+06	1.94494e+06	95175	287614	911445	278940	41783.1	3.17495e+07	1.55075e+06	147505	2.5809e+08	1.25324e+06	1.93077e+06	125786	242733	6.93315e+06	5.57615e+06	1.34863e+07	4.5919e+06	6.57894e+06	989856	321839	9.20599e+06	32524.6	87650	155035	412560	163311	171413	157645	135328	30001.8	883970	328349	413705
CS25131	283 B2 d14	untreated d14	283	OvC3		646164	1.17032e+06	6.32643e+07	212651	486632	252890	2.7876e+06	1.37338e+06	757153	1.64996e+06	2.02086e+06	97455.5	283953	945582	277476	39702.7	3.27115e+07	1.29804e+06	146786	2.46322e+08	1.32969e+06	2.28393e+06	126001	247206	5.8605e+06	5.23818e+06	1.19886e+07	4.39712e+06	7.1381e+06	61540.7	343888	8.35864e+06	33467.7	91129.9	165656	427937	174499	176613	146331	142016	30138.6	537252	307143	292364
CS25132	283 B1 d21	untreated d21	283	OvC3		604513	316648	7.2855e+07	228607	460493	106388	3.68023e+06	2.16455e+06	799317	1.63876e+06	1.407e+06	96426	254695	936495	296688	43559.1	2.7025e+07	1.4547e+06	194920	2.83101e+08	805605	1.89393e+06	143060	229542	9.27224e+06	6.36952e+06	7.65626e+06	4.57913e+06	8.64994e+06	604186	330719	1.01032e+07	30152.9	90069	159312	492320	167817	165665	106506	122920	27688	299458	145148	234716
CS25133	283 B2 d21	untreated d21	283	OvC3		596009	686172	6.87255e+07	216113	304869	275046	2.42431e+06	1.37996e+06	805400	1.02521e+06	1.43564e+06	102929	244875	914008	275783	43967.1	2.87414e+07	1.33693e+06	166197	2.2686e+08	1.11223e+06	1.63707e+06	171932	234172	6.65408e+06	5.71401e+06	1.21079e+07	4.42888e+06	6.07684e+06	931226	354109	9.33042e+06	30300.8	111116	164319	618102	173091	159216	120939	133640	30520	590772	184277	118518
CS25134	283 C1 d14	carboplatin d14	283	OvC3		572921	905738	7.24459e+07	195060	206447	175351	3.67074e+06	1.71819e+06	781175	742963	2.75115e+06	93129.3	238118	875902	266630	43583.9	2.78839e+07	1.38178e+06	146602	2.62566e+08	1.56835e+06	2.51008e+06	145967	234111	8.79783e+06	5.34354e+06	1.50086e+07	4.71503e+06	8.44192e+06	963348	339115	8.72081e+06	29074.3	89833.1	163357	502782	172077	160645	137021	119360	33957.7	753198	315656	571790
CS25135	283 C2 d14	carboplatin d14	283	OvC3		776079	689864	6.83588e+07	196924	409637	181573	3.86852e+06	1.6539e+06	760411	1.62527e+06	2.53671e+06	97657.6	251074	905856	262387	41325.7	2.55686e+07	1.39467e+06	142813	2.5614e+08	1.42653e+06	2.27975e+06	157581	233950	8.41188e+06	4.90984e+06	1.41256e+07	4.00111e+06	6.76466e+06	36580.5	345966	7.81769e+06	28188.8	92416.1	166657	528459	175553	160698	127020	125591	33863.5	783800	346480	112611
CS25136	283 C1 d21	carboplatin d21	283	OvC3		627680	177181	7.32026e+07	216751	344004	125930	4.93296e+06	2.43063e+06	716937	1.27209e+06	1.98879e+06	96295.7	260738	976326	297960	42049.1	1.92695e+07	1.59751e+06	189989	2.90306e+08	854097	1.7876e+06	121401	223007	1.14969e+07	5.88952e+06	1.93878e+07	4.99717e+06	8.85508e+06	308026	361250	9.37097e+06	29829.4	89597	174020	431488	183309	162608	76187.4	108259	31784.1	934830	124117	499694
CS25137	283 C2 d21	carboplatin d21	283	OvC3		695906	167757	7.11552e+07	235640	426143	121929	4.44938e+06	2.32728e+06	770768	1.53075e+06	1.93663e+06	103737	282636	933660	292435	43924.4	1.73595e+07	1.59466e+06	116874	2.95669e+08	729904	1.76156e+06	146378	236718	1.11085e+07	5.88322e+06	1.93177e+07	5.17904e+06	8.34445e+06	34420.5	309511	9.46178e+06	32252.3	97916.1	149096	521974	157055	163840	93782.5	128417	32854.7	587216	170373	607743
CS25138	283 D1 d14	paclitaxel d14	283	OvC3		1.04248e+08	1.87008e+06	7.42659e+07	208260	2.55925e+08	2.16841e+06	2.72886e+06	1.61892e+06	949655	8.64805e+08	2.51238e+06	91392.6	239360	4.89685e+07	310737	42554	3.62641e+07	1.45693e+06	158083	2.48081e+08	2.48424e+06	2.54762e+06	128721	247733	5.08908e+06	6.01584e+06	9.35122e+06	5.22848e+06	5.7226e+06	2.89722e+06	339704	1.02045e+07	4.20288e+06	89674.6	163641	450626	172376	165720	132416	102118	30073.2	1.86465e+07	367037	1.40048e+07
CS25139	283 D2 d14	paclitaxel d14	283	OvC3		8.02741e+07	2.15016e+06	7.27945e+07	205287	2.76385e+08	2.2252e+06	2.50436e+06	1.41968e+06	880251	9.30675e+08	2.69114e+06	104790	279342	4.83726e+07	302387	41016	3.86524e+07	1.40038e+06	143461	2.4663e+08	3.11682e+06	2.46173e+06	143709	233620	4.56664e+06	6.29766e+06	1.00629e+07	4.80455e+06	4.26193e+06	3.03019e+06	351323	1.0391e+07	5.51534e+06	89207.1	169237	563040	178272	173826	136118	126109	29673.6	2.26171e+07	299166	1.71923e+07
CS25140	283 D1 d21	paclitaxel d21	283	OvC3		1.51877e+08	928665	8.40382e+07	207002	3.57649e+08	1.77363e+06	3.27392e+06	1.92732e+06	1.13601e+06	1.26736e+09	1.81461e+06	88852	255330	6.65133e+07	265081	41434	3.15712e+07	1.53158e+06	206201	2.62065e+08	2.47069e+06	1.75625e+06	151796	233648	6.98154e+06	7.18097e+06	1.22551e+07	5.41178e+06	6.34463e+06	2.54387e+06	440975	1.17058e+07	5.71379e+06	90467.5	171416	515623	180566	178705	117524	111348	32835	2.58545e+07	211066	1.92924e+07
CS25141	283 D2 d21	paclitaxel d21	283	OvC3		1.54305e+08	562899	7.65853e+07	236236	3.26942e+08	1.50308e+06	3.00193e+06	1.60855e+06	1.01861e+06	1.11234e+09	1.66302e+06	110816	260583	6.58739e+07	282201	42031.1	2.69614e+07	1.42316e+06	170042	2.38897e+08	1.73234e+06	1.93203e+06	157175	267235	6.92144e+06	6.60331e+06	1.32197e+07	5.16593e+06	7.1301e+06	1.87935e+06	335908	1.0808e+07	5.13224e+06	94300.1	161812	565040	170450	171177	114492	130077	30082.7	2.10314e+07	191645	1.58366e+07
CS25142	283 E1 d14	carboplatin + paclitaxel d14	283	OvC3		1.45321e+08	1.12463e+06	7.12453e+07	217465	2.96771e+08	427578	3.06087e+06	1.72986e+06	871530	9.60343e+08	2.5497e+06	89403.9	254535	6.74566e+07	261842	42520.4	2.73733e+07	1.35196e+06	141530	2.41941e+08	2.31086e+06	2.26072e+06	154497	238839	8.36874e+06	5.7093e+06	1.39183e+07	4.3847e+06	7.25645e+06	1.37008e+06	323827	9.21909e+06	2.56038e+06	96053.3	155992	490083	164319	166102	217409	113103	33495.1	1.18097e+07	310210	9.09023e+06
CS25143	283 E2 d14	carboplatin + paclitaxel d14	283	OvC3		1.98128e+08	1.18934e+06	6.89196e+07	208311	3.18395e+08	263846	3.23384e+06	1.40245e+06	762972	1.06099e+09	2.65711e+06	94625.3	268305	7.09457e+07	275341	42648.8	2.87628e+07	1.36649e+06	131124	2.19765e+08	4.16411e+06	2.33924e+06	132596	237047	7.39248e+06	5.4044e+06	1.24237e+07	4.25284e+06	6.29851e+06	1.0032e+06	321857	8.90755e+06	3.38466e+06	91619.1	155043	417221	163320	159067	314112	125689	30932.3	1.50451e+07	293022	1.09471e+07
CS25144	283 E1 d21	carboplatin + paclitaxel d21	283	OvC3		3.47559e+08	232594	8.29796e+07	217482	4.54969e+08	84860.4	6.56178e+06	3.49168e+06	1.04484e+06	1.45598e+09	2.1806e+06	87736.8	269848	1.094e+08	289635	44100.1	1.23025e+07	1.68121e+06	184265	3.04925e+08	1.03361e+06	2.0451e+06	116367	267098	1.36524e+07	6.9531e+06	2.58874e+07	5.66413e+06	9.61514e+06	228268	345262	1.11949e+07	321605	91690.3	166318	409938	175196	181912	92111.8	74844.8	36330.3	1.3678e+06	184747	782941
CS25145	283 E2 d21	carboplatin + paclitaxel d21	283	OvC3		1.07716e+08	290121	7.48827e+07	236790	3.4083e+08	22230.6	6.51228e+06	2.72056e+06	999917	1.06782e+09	1.59599e+06	84973.7	259605	6.62256e+07	271475	42034.6	1.00766e+07	1.63286e+06	201638	2.66943e+08	903594	1.89909e+06	127908	232693	1.23733e+07	5.88823e+06	2.21083e+07	4.88462e+06	9.60509e+06	153885	351097	9.96394e+06	114782	89756.7	169129	403019	178157	160736	71016.5	116215	37158.9	453860	204316	281934
CS25146	287 B1 d14	untreated d14	287	OvC6		628226	2.57757e+06	7.44776e+07	251965	467182	99976.1	2.26096e+06	1.63008e+06	1.40072e+06	1.45276e+06	2.11543e+06	98504.5	264503	931217	301641	42407.1	3.47918e+07	1.55692e+06	161154	2.7456e+08	1.17904e+06	1.84972e+06	141382	266458	5.17056e+06	6.74265e+06	1.09315e+07	5.3498e+06	6.20023e+06	9.06782e+06	337622	1.10336e+07	30060.6	92472.7	166524	506477	175414	175244	42580.6	109398	26106.4	686402	359914	452516
CS25147	287 B2 d14	untreated d14	287	OvC6		571330	3.25396e+06	7.08744e+07	233481	387998	76793.2	2.56068e+06	1.37375e+06	1.24243e+06	1.54974e+06	2.0844e+06	108096	275556	858471	347530	42062.8	3.76525e+07	1.47403e+06	142935	2.62893e+08	1.48625e+06	1.77896e+06	138204	264249	4.93973e+06	6.40458e+06	8.84795e+06	5.33752e+06	4.59308e+06	7.35557e+06	348954	1.0202e+07	27026.7	90920.4	172361	517949	181562	184499	52682.7	141660	29307.5	452074	323013	215396
CS25148	287 B1 d21	untreated d21	287	OvC6		666348	1.96379e+06	7.81142e+07	211537	242341	138322	3.23447e+06	1.89166e+06	1.46606e+06	803288	1.93892e+06	109655	263042	988717	309496	44029.5	3.37383e+07	1.71674e+06	157226	3.07241e+08	1.08539e+06	2.0156e+06	142209	237206	6.29366e+06	6.30663e+06	1.24681e+07	5.61634e+06	6.85733e+06	5.45412e+06	502906	1.07058e+07	26635.4	95477.4	167125	535762	176047	177974	62413.1	135271	29201.6	1.1337e+06	433677	536588
CS25149	287 B2 d21	untreated d21	287	OvC6		631462	3.42046e+06	7.69462e+07	217935	306062	124748	3.22732e+06	1.65314e+06	1.42271e+06	969824	1.94191e+06	106134	278023	927010	270387	42392.1	3.52758e+07	1.60705e+06	170020	2.96334e+08	1.46474e+06	1.8568e+06	143221	260026	5.8486e+06	6.7627e+06	1.29741e+07	5.3033e+06	6.80518e+06	5.15371e+06	328072	1.07928e+07	28842.4	95970.8	161183	516889	169787	178578	39433.3	137459	29089.9	788474	375036	461875
CS25150	287 C1 d14	carboplatin d14	287	OvC6		657334	2.563e+06	7.70754e+07	194511	343027	48675.7	3.47616e+06	1.39781e+06	1.34359e+06	1.14827e+06	2.64544e+06	100415	248488	822620	283051	40812.3	3.27633e+07	1.70753e+06	137286	3.05849e+08	1.67252e+06	1.93947e+06	139236	226106	7.19486e+06	5.93671e+06	1.20714e+07	5.20974e+06	7.50622e+06	4.48908e+06	331949	9.75717e+06	24789.1	91564.7	164605	467602	173392	183855	108245	115372	32271.3	1.25152e+06	348774	569816
CS25151	287 C2 d14	carboplatin d14	287	OvC6		625279	3.34956e+06	6.61296e+07	231405	415140	39148.1	2.16095e+06	1.14066e+06	1.15037e+06	1.55058e+06	2.29564e+06	107109	288233	927138	258826	40923.1	3.42249e+07	1.31178e+06	166399	2.33813e+08	1.5381e+06	1.67366e+06	126702	237826	3.83983e+06	5.22886e+06	6.25558e+06	4.65664e+06	3.46188e+06	7.05543e+06	333260	8.32072e+06	27575.4	91911.1	163681	509981	172419	176866	63662.9	131088	27542.4	328092	286882	532999
CS25152	287 C1 d21	carboplatin d21	287	OvC6		581451	802443	8.15258e+07	259453	483200	84516.3	5.09244e+06	2.80334e+06	1.46957e+06	1.66502e+06	2.58572e+06	93105.3	291842	862848	335093	43039.3	1.90413e+07	1.87012e+06	195221	3.29865e+08	1.25586e+06	1.93957e+06	125204	274396	1.05611e+07	6.39873e+06	1.86149e+07	5.86999e+06	7.95534e+06	2.65714e+06	342673	1.01917e+07	26654.7	93169	169124	432013	178152	170701	96432.6	118405	35324.5	811446	451548	449115
CS25153	287 C2 d21	carboplatin d21	287	OvC6		611798	758973	6.38192e+07	237855	501291	31964.3	3.14042e+06	1.56374e+06	1.14277e+06	1.71952e+06	2.10212e+06	98755.1	265543	910388	297377	41498	1.73317e+07	1.37964e+06	109551	2.49816e+08	1.27731e+06	1.45667e+06	130379	269268	7.56506e+06	4.63947e+06	1.48459e+07	4.88782e+06	7.62383e+06	1.62805e+06	347327	7.33531e+06	26897.8	92962.4	171176	388455	180313	173527	100851	148985	32003.4	485670	359768	544755
CS25154	287 D1 d14	paclitaxel d14	287	OvC6		9.08234e+07	1.40525e+06	6.30495e+07	202954	2.84402e+08	558447	2.09108e+06	1.19566e+06	1.21414e+06	9.49987e+08	1.61418e+06	94212.3	266889	5.09354e+07	262753	41836.3	2.72868e+07	1.44415e+06	121331	2.20164e+08	1.15436e+06	1.60597e+06	133929	212643	5.14033e+06	5.70361e+06	9.968e+06	4.89853e+06	7.02869e+06	6.14706e+06	334855	9.16825e+06	2.33209e+06	88998.3	163651	426064	172387	167333	58584.4	120620	22952.1	1.12932e+07	357269	8.02408e+06
CS25155	287 D2 d14	paclitaxel d14	287	OvC6		7.84234e+07	1.34211e+06	6.50671e+07	197638	2.82495e+08	531209	2.13444e+06	1.05293e+06	1.15328e+06	9.42748e+08	1.52488e+06	94969.7	268517	5.33449e+07	293366	44019.9	3.1579e+07	1.3207e+06	160246	2.23682e+08	1.27677e+06	1.46376e+06	130609	246238	4.84565e+06	5.68867e+06	9.6123e+06	4.59951e+06	5.36173e+06	6.01932e+06	343372	8.95699e+06	2.94749e+06	95011.3	168289	438850	177273	169340	60418.5	125491	26253.8	1.3923e+07	352953	9.84351e+06
CS25156	287 D1 d21	paclitaxel d21	287	OvC6		4.9306e+07	195378	6.61874e+07	230005	2.60763e+08	186260	2.89104e+06	1.38051e+06	1.20959e+06	8.81144e+08	1.49916e+06	95440	262934	4.52876e+07	297169	43468.9	1.54967e+07	1.49439e+06	137308	2.3691e+08	1.18275e+06	1.40927e+06	131424	242768	7.78994e+06	5.4371e+06	1.42154e+07	4.1406e+06	7.43085e+06	2.40371e+06	328633	8.9145e+06	2.00252e+06	91060.7	162773	429887	171462	173586	38677.5	120843	27858.7	9.52194e+06	378698	6.87633e+06
CS25157	287 D2 d21	paclitaxel d21	287	OvC6		7.01262e+07	629722	6.35393e+07	230310	2.60184e+08	214989	2.82736e+06	1.33099e+06	1.14065e+06	8.41449e+08	1.62833e+06	96647.5	265710	5.08305e+07	281184	42525.8	1.7687e+07	1.34987e+06	126742	2.1806e+08	1.11543e+06	1.47441e+06	141338	245955	7.55569e+06	4.99448e+06	1.21222e+07	4.23249e+06	7.7778e+06	2.6362e+06	354199	7.84936e+06	3.0549e+06	89749.7	175522	506546	184892	169700	33383.1	116225	24570.1	1.33622e+07	347771	9.98965e+06
CS25158	287 E1 d14	carboplatin + paclitaxel d14	287	OvC6		4.297e+07	1.42567e+06	6.76275e+07	213343	2.36227e+08	101430	2.30064e+06	1.06832e+06	1.11521e+06	8.33062e+08	1.96845e+06	98681.7	296465	3.88399e+07	263281	41792.8	2.62504e+07	1.41176e+06	138902	2.1767e+08	1.62843e+06	1.52568e+06	150272	231705	5.22955e+06	5.01985e+06	9.49106e+06	4.44289e+06	5.9462e+06	5.20077e+06	342374	8.368e+06	2.8902e+06	92551	168339	507127	177326	173233	64585.2	129923	29052.1	1.40535e+07	278821	1.01923e+07
CS25159	287 E2 d14	carboplatin + paclitaxel d14	287	OvC6		6.10241e+07	1.57003e+06	6.17797e+07	220440	2.65343e+08	28485.5	1.87763e+06	1.11655e+06	1.02045e+06	8.50977e+08	2.05972e+06	94944.8	272107	4.28708e+07	293780	39738.6	2.88034e+07	1.24725e+06	125491	2.19666e+08	1.79075e+06	1.51676e+06	117320	251020	5.79144e+06	4.67729e+06	1.0534e+07	4.0516e+06	6.08746e+06	4.0354e+06	355259	7.45705e+06	3.31096e+06	88034.4	175646	460492	185022	186971	98927	148440	30071.7	1.63051e+07	240279	1.14394e+07
CS25160	287 E1 d21	carboplatin + paclitaxel d21	287	OvC6		6.51377e+07	312861	6.54651e+07	227496	2.5963e+08	140976	3.14035e+06	1.37714e+06	1.08628e+06	8.59338e+08	1.96156e+06	110146	267446	4.82569e+07	280851	40595.8	1.55652e+07	1.37668e+06	110128	2.34169e+08	1.25957e+06	1.53728e+06	120651	266467	7.2834e+06	4.95408e+06	1.35506e+07	4.263e+06	7.30009e+06	2.19087e+06	340325	7.84338e+06	2.97147e+06	91370.7	168126	410782	177101	178859	56748.6	124276	26292.8	1.49704e+07	325945	1.14285e+07
CS25161	287 E2 d21	carboplatin + paclitaxel d21	287	OvC6		4.2323e+07	144503	6.09427e+07	243857	2.55515e+08	67613.7	2.08956e+06	1.19988e+06	1.03487e+06	8.48832e+08	1.71791e+06	99046.7	256552	4.2595e+07	337983	43470	1.29775e+07	1.30114e+06	105399	2.12977e+08	801815	1.40068e+06	152937	238368	8.56228e+06	4.27375e+06	6.43578e+06	4.42606e+06	8.5218e+06	1.66029e+06	343581	6.86923e+06	2.68592e+06	92392.7	169680	451133	178738	163876	55722.2	121310	26485.8	1.54751e+07	267822	1.18491e+07
CS25162	290 B1 d14	untreated d14	290	OvC7		638986	3.88978e+06	7.3194e+07	209159	277403	58772.4	3.49842e+06	1.66828e+06	982282	836144	1.8005e+06	98372.7	238726	922886	287005	43601.4	3.60803e+07	1.45683e+06	156916	2.68036e+08	2.06701e+06	2.28604e+06	145453	230590	6.61961e+06	6.56094e+06	1.23936e+07	5.25343e+06	6.64691e+06	6.07969e+06	336829	1.05285e+07	27079.1	93950.5	164551	517490	173335	186381	74377.9	138143	30342.2	644090	421949	564068
CS25163	290 B2 d14	untreated d14	290	OvC7		662696	3.91328e+06	7.40685e+07	229763	394905	25038.4	2.74762e+06	1.27954e+06	962193	1.27683e+06	2.10303e+06	95938.2	252223	949481	287485	42330.2	3.47683e+07	1.64585e+06	162902	2.63794e+08	2.55376e+06	1.97633e+06	143085	228831	5.31918e+06	6.69968e+06	1.045e+07	6.09615e+06	5.68222e+06	7.63559e+06	332542	1.07903e+07	27566.1	93027.4	163080	470887	171785	185106	72999.8	123354	27762	664222	349204	545508
CS25164	290 B1 d21	untreated d21	290	OvC7		561818	1.99426e+06	7.31373e+07	242502	268036	134248	3.60691e+06	1.40695e+06	1.02316e+06	816404	1.95043e+06	90625.3	320734	822353	311189	44204.3	3.12048e+07	1.45341e+06	133710	2.72721e+08	1.54503e+06	2.33967e+06	131755	281007	7.52136e+06	5.92853e+06	1.26418e+07	5.5549e+06	7.03368e+06	3.33358e+06	315560	9.86942e+06	27428.9	96358.4	156221	505013	164560	181102	27503.6	134537	32988.6	270397	384956	134612
CS25165	290 B2 d21	untreated d21	290	OvC7		689781	2.15369e+06	6.39654e+07	213752	446475	75069.7	2.2468e+06	1.25052e+06	890239	1.67145e+06	1.61242e+06	96301.1	242907	979179	244516	41175.4	3.10413e+07	1.27555e+06	120009	2.28412e+08	1.54394e+06	1.97441e+06	131029	232381	5.45367e+06	5.77251e+06	1.05484e+07	4.56777e+06	6.56643e+06	4.29414e+06	327328	9.13637e+06	35184.8	90329	159995	414718	168536	171543	49945.7	135478	25613.9	440157	300121	119457
CS25166	290 C1 d14	carboplatin d14	290	OvC7		737528	1.99444e+06	7.59972e+07	226607	984345	19999.2	2.98652e+06	2.03325e+06	945037	2.152e+06	2.62203e+06	98852.2	247269	1.03982e+06	277354	40244.3	2.88432e+07	1.6003e+06	123302	2.87563e+08	3.52253e+06	2.29429e+06	148718	243524	8.5027e+06	6.09485e+06	1.58421e+07	5.59709e+06	9.04853e+06	4.6047e+06	315112	9.74777e+06	28035.3	95210.2	153554	495868	161751	165413	92724.2	114009	28472	242462	359576	198254
CS25167	290 C2 d14	carboplatin d14	290	OvC7		513799	1.60558e+06	7.27449e+07	218803	324868	23195.8	4.10729e+06	1.81753e+06	912137	785665	2.39276e+06	93296.9	275369	761007	273478	42163.6	2.38746e+07	1.51103e+06	177776	2.66557e+08	2.97919e+06	1.8591e+06	137751	235558	8.7485e+06	5.62067e+06	1.63087e+07	5.24593e+06	6.81778e+06	2.62646e+06	304550	8.81325e+06	24505.6	88636.3	150994	510094	159054	176297	86346	129422	34130	657533	363912	144911
CS25168	290 C1 d21	carboplatin d21	290	OvC7		644472	410555	7.83265e+07	198396	291868	25428.6	5.56271e+06	2.68962e+06	1.09597e+06	811088	2.23665e+06	91849.2	244708	928550	272222	41830.8	1.39524e+07	1.62981e+06	169245	2.93332e+08	1.47088e+06	2.2783e+06	127151	246109	1.05711e+07	5.65326e+06	1.92125e+07	6.00144e+06	7.46219e+06	1.14848e+06	366681	9.37815e+06	27407	90551.3	180459	503944	190092	175860	66548.2	90314.2	38874.5	368560	458120	218107
CS25169	290 C2 d21	carboplatin d21	290	OvC7		568078	185799	7.22888e+07	225166	304623	50070.5	4.99808e+06	2.4104e+06	1.02134e+06	907099	1.93508e+06	100990	264759	858601	285823	44406.5	1.27797e+07	1.56946e+06	191911	2.57231e+08	899707	2.08211e+06	128659	254278	1.04592e+07	5.24768e+06	1.6988e+07	4.94458e+06	8.17639e+06	511667	338042	8.35483e+06	27057.8	91767.2	166811	470057	175716	176764	54201.9	129808	32369.2	754513	382025	417325
CS25170	290 D1 d14	paclitaxel d14	290	OvC7		1.272e+08	2.38515e+06	7.04914e+07	206458	3.33806e+08	71066	2.52234e+06	1.30057e+06	1.00417e+06	1.07278e+09	1.8468e+06	91970.4	302143	5.72895e+07	293292	40803.6	3.39741e+07	1.37802e+06	140019	2.11379e+08	2.76007e+06	2.15065e+06	122123	233337	4.72759e+06	5.95828e+06	9.55967e+06	5.09431e+06	6.21229e+06	6.91583e+06	348931	9.55241e+06	3.87146e+06	87991.9	170937	396626	180062	173255	71903.7	110208	25563.1	1.6617e+07	410200	1.23321e+07
CS25171	290 D2 d14	paclitaxel d14	290	OvC7		1.06853e+08	1.59873e+06	6.63742e+07	212314	2.80619e+08	69357.8	2.21705e+06	1.19442e+06	957967	9.55466e+08	1.8245e+06	103739	299356	6.02041e+07	294470	40221.8	2.94992e+07	1.20243e+06	134329	1.95685e+08	2.65561e+06	1.95491e+06	119140	256611	6.05906e+06	5.34533e+06	1.03048e+07	4.25689e+06	7.02102e+06	3.72414e+06	336929	8.74627e+06	2.86934e+06	90514.5	165509	350825	174344	169306	76271.9	109724	21006.2	1.25386e+07	361701	9.26624e+06
CS25172	290 D1 d21	paclitaxel d21	290	OvC7		1.33564e+08	815437	7.12605e+07	218135	2.56861e+08	181484	3.184e+06	1.78774e+06	1.10651e+06	8.65845e+08	1.77e+06	94395.6	264286	5.42604e+07	276586	40573.4	2.16936e+07	1.60551e+06	147886	2.42967e+08	1.75809e+06	2.25153e+06	139737	268705	7.66167e+06	5.98373e+06	1.39689e+07	4.90782e+06	6.58046e+06	2.40184e+06	325776	9.58366e+06	1.79459e+06	91469.6	160707	463401	169286	171946	104729	145078	33011.5	1.36612e+07	502290	1.0103e+07
CS25173	290 D2 d21	paclitaxel d21	290	OvC7		2.24084e+08	408150	6.28358e+07	222638	2.99866e+08	129472	2.96921e+06	1.69761e+06	1.04201e+06	9.88689e+08	1.43058e+06	102631	254927	7.84301e+07	266195	39832	1.52017e+07	1.30045e+06	110810	1.94033e+08	1.40167e+06	1.95287e+06	133866	229726	7.03771e+06	5.12933e+06	1.29604e+07	4.30746e+06	6.54805e+06	1.18026e+06	324818	8.16963e+06	2.44349e+06	92466.3	159005	439159	167493	167167	66362.7	131131	28872.7	1.07901e+07	531555	8.2423e+06
CS25174	290 E1 d14	carboplatin + paclitaxel d14	290	OvC7		2.98279e+08	1.13875e+06	7.46154e+07	221666	3.85409e+08	33310.2	2.80796e+06	1.47857e+06	957995	1.24654e+09	2.21607e+06	95402.6	272477	9.66951e+07	273662	41196.8	2.31075e+07	1.55501e+06	155210	2.49356e+08	2.1788e+06	2.32488e+06	128262	223993	8.40876e+06	5.49925e+06	1.6748e+07	4.70122e+06	8.17466e+06	3.21535e+06	342539	9.17913e+06	2.5148e+06	89835.2	167283	411532	176213	170486	156802	118392	28141.3	1.1065e+07	405025	8.19202e+06
CS25175	290 E2 d14	carboplatin + paclitaxel d14	290	OvC7		1.50484e+08	756305	6.54317e+07	216743	3.07796e+08	17802.7	3.39685e+06	1.48297e+06	825669	1.00381e+09	1.96292e+06	103935	248942	6.75857e+07	252277	41158.7	1.74065e+07	1.24257e+06	108418	2.14259e+08	1.60368e+06	1.93101e+06	114134	216138	8.29649e+06	5.34478e+06	1.49004e+07	4.1792e+06	7.69768e+06	1.30066e+06	331393	8.07135e+06	1.01717e+06	90404.5	161816	361836	170454	169612	143338	131264	24232.2	5.42613e+06	368218	3.63421e+06
CS25176	290 E1 d21	carboplatin + paclitaxel d21	290	OvC7		1.53639e+08	189613	7.26329e+07	246075	3.59128e+08	64476.9	4.97148e+06	2.30043e+06	1.05492e+06	1.16303e+09	2.01789e+06	97784.3	261703	8.33239e+07	292191	43006.9	1.0218e+07	1.6767e+06	170391	2.50901e+08	830772	2.21357e+06	146923	252769	1.00785e+07	5.52177e+06	2.1277e+07	4.82789e+06	8.2313e+06	51470.5	339291	9.01905e+06	825902	93222.5	166618	530517	175512	177687	81208.7	127241	32272.1	4.25661e+06	491505	2.93879e+06
CS25177	290 E2 d21	carboplatin + paclitaxel d21	290	OvC7		4.45877e+07	154170	6.46634e+07	222682	2.72631e+08	19197.4	4.16281e+06	1.78119e+06	900308	9.09304e+08	1.29982e+06	102850	294045	4.81371e+07	308360	41006.6	8.01498e+06	1.34193e+06	133059	2.08723e+08	663996	1.84771e+06	126653	261101	1.00545e+07	4.40685e+06	1.85593e+07	4.17717e+06	8.71269e+06	80868	349499	6.98889e+06	27163.6	91977.1	172910	423100	182140	181884	76042.8	140142	29993.1	581350	412263	150404
CS25178	media only 1	media baseline control	media			657733	52552.4	7.19149e+07	204061	327442	20229	6.24116e+06	2.77396e+06	1.25901e+06	1.02042e+06	436387	95443.7	269919	936333	269800	43238.9	8.1723e+06	1.88577e+06	148329	3.26157e+08	745462	395689	120103	230619	1.11155e+07	5.93853e+06	1.90572e+07	4.77084e+06	7.72904e+06	120510	332282	9.56072e+06	27642	90429.5	162707	367653	171393	190809	36363.7	140103	35078.6	365138	466479	201527
CS25179	media only 2	media baseline control	media			634591	90045.3	7.62212e+07	217810	288425	21320.6	6.79735e+06	2.32885e+06	1.28276e+06	946601	509471	87080.9	249729	919610	289358	42466.5	9.02493e+06	2.05965e+06	159519	3.61158e+08	708415	447814	117027	247130	1.21127e+07	6.47632e+06	2.34371e+07	5.18252e+06	9.0403e+06	47644.1	354849	1.03079e+07	32897.3	92994.4	170936	402497	180061	175390	37361.8	63801.3	38285.7	881983	482271	640564
CS25180	media + SOC 1	media + drugs baseline control	media			2.2804e+08	194934	7.68113e+07	213499	4.21014e+08	19539	8.0723e+06	3.45112e+06	1.20298e+06	1.31261e+09	649148	97361.8	252647	8.3624e+07	270233	41877.9	9.58904e+06	1.90635e+06	150566	2.94094e+08	805693	417134	135807	231582	1.20989e+07	5.85294e+06	2.33464e+07	4.91177e+06	1.01065e+07	125375	322720	9.39008e+06	27277.6	94105.1	157284	414295	165680	166980	62067.9	108823	31422.3	836156	329640	443299
CS25181	media + SOC 2	media + drugs baseline control	media			8.15553e+07	154491	8.23059e+07	241436	2.98098e+08	22795.3	8.86427e+06	3.48625e+06	1.46093e+06	9.82569e+08	665500	89587.3	262967	5.58552e+07	308930	42798.9	9.19463e+06	1.80722e+06	188118	3.30212e+08	824015	518009	151611	240436	1.30119e+07	5.87041e+06	2.26912e+07	5.25966e+06	9.16886e+06	153945	367522	9.82418e+06	28943.3	92255.3	177041	527233	186492	164556	56308.1	102322	37805.3	837993	408554	171105
[truncated: 41 more columns]

## Sheet: Annotation level 2b
					DP	12.2368	17.2805	2.22944	9.25606	11.9225	6.89164	1.0002	7.18684	10.4707	1.87012	4.987	39.2965	19.4898	3.00444	28.2204	2.02083	8.17254	1.92693	3.1503	5.7392	24.7682	1.03389	1.45168	8.53707	2.86763	6.71781	14.0354	4.50267	5.35833	5.66545	1.91318	31.2177	33.3081	38.0982	28.4806	12.2329	12.0974	2.39534
					Relative precision (%)	11.4068	7.44181	3.854	6.06931	10.8018	7.33568	18.6056	2.99065	3.35363	9.98331	6.29107	5.54875	3.8593	5.27197	2.93095	3.79371	3.90515	4.36766	9.90839	3.83585	5.41432	8.37095	4.08771	6.81758	5.37417	7.57569	7.21764	3.51206	12.157	5.11932	8.63558	3.30144	3.12248	2.90325	3.66788	4.9545	3.29902	3.7117
					LOD	83243.4	37130.9	43988.2	32565.7	57171	29706.5	128268	87731.1	357627	29991.4	24939.6	74051	84590.6	23700.5	92831.4	152546	101337	15752.7	274428	170866	31060.3	441733	6685.12	112314	48275.4	788584	216261	43433.1	24138.3	10181	7896.05	2.74816e+06	2.45799e+06	6.13974e+06	6.1687e+06	761463	188876	65328.4
					RT [min]	7.735	6.501	4.36	6.738	6.612	2.709	1.85	6.918	7.187	7.037	1.217	5.019	5.719	4.554	1.504	4.369	5.361	4.368	6.845	1.43	6.144	7.16	1.525	4.556	1.544	6.654	6.767	4.969	1.768	1.827	1.274	6.686	6.743	6.33	6.447	6.625	6.597	7.056
					Molecular Weight	188.141	189.1	164.047	273.1	201.079	166.085	143.041	308.119	308.12	376.038	144.042	152.059	159.068	133.053	136.064	135.068	210.1	146.037	210.137	128.059	182.058	202.074	102.054	116.047	140.059	239.116	191.095	197.08	202.143	202.143	188.152	502.299	546.325	326.194	370.221	179.094	193.074	408.224
					Formula	C10 H20 O3	C8 H15 N O4	C9 H8 O3	C15 H15 N O4	C12 H11 N O2	C7 H10 N4 O	C6 H9 N O S	C15 H20 N2 O3 S	C15 H20 N2 O3 S	C17 H16 N2 O2 S3	C6 H8 O4	C7 H8 N2 O2	C10 H9 N O	C8 H7 N O	C7 H8 N2 O	C8 H9 N O	C10 H14 N2 O3	C9 H6 O2	C11 H18 N2 O2	C5 H8 N2 O2	C9 H10 O4	C11 H10 N2 O2	C2 H6 N4 O	C5 H8 O3	C6 H8 N2 O2	C12 H17 N O4	C11 H13 N O2	C8 H11 N3 O3	C8 H18 N4 O2	C8 H18 N4 O2	C9 H20 N2 O2	C22 H46 O12	C24 H50 O13	C14 H30 O8	C16 H34 O9	C10 H13 N O2	C10 H11 N O3	C17 H28 N8 O4
					Annotation level	2b	2b	2b	2b	2b	2b	2b	2b	2b	2b	2b	2b	2b	2b	2b	2b	2b	2b	2b	2b	2b	2b	2b	2b	2b	2b	2b	2b	2b	2b	2b	2b	2b	2b	2b	2b	2b	2b
					Name	10-Hydroxydecanoic acid	2-Aminooctanedioic acid	2-Hydroxycinnamic acid	2-morpholinophenyl 2-furoate	4-(allyloxy)-1,2-dihydroquinolin-2-one	4-cyclopropyl-6-methoxy-1,3,5-triazin-2-amine	4-Methyl-5-thiazoleethanol	5,5-dimethyl-2-{[(2-phenylacetyl)amino]methyl}-1,3-thiazolane-4-carboxylic acid	5,5-dimethyl-2-{[(2-phenylacetyl)amino]methyl}-1,3-thiazolane-4-carboxylic acid	5-[(4-methoxyphenyl)thio]-3-{[(4-methoxyphenyl)thio]methyl}-1,2,4-thiadiazole	5-hydroxy-4-methoxy-5,6-dihydro-2H-pyran-2-one	5-Nitro-o-toluidine	6-Methoxyquinoline	6-Methylbenzoxazole	6-Methylnicotinamide	Acetanilide	Aprobarbital	Coumarin	Cyclo(leucylprolyl)	Dihydrothymine	DL-4-Hydroxyphenyllactic acid	ethyl 2-cyano-3-(3-pyridinyl)acrylate	Guanylurea	Levulinic acid	Methylimidazoleacetic acid	N-[1-(4-Methoxy-2-oxo-2H-pyran-6-yl)-2-methylpropyl]acetamide	N1-(2-oxopropyl)-2-phenylacetamide	N1-[4-hydroxy-6-(methoxymethyl)pyrimidin-2-yl]acetamide	N3,N4-Dimethyl-L-arginine	N3,N4-Dimethyl-L-arginine	N6,N6,N6-Trimethyl-L-lysine	PEG n11	PEG n12	PEG n7	PEG n8	Phenibut	Phenylacetylglycine	RPH
					Compound #	X02483	X03340	X00264	X03233	X03238	X00327	X00182	X00390	X00249	X02547	X00606	X01476	X03363	X00578	X00280	X00437	X00416	X01245	X02620	X00819	X01867	X01730	X02876	X02613	X03501	X01797	X00223	X00629	X01815	X01812	X01975	X00202	X00146	X00241	X00221	X00342	X01171	X00988
MS-Omics ID	Customer ID	Treatment	original legend	OvC case	Unit	Area	Area	Area	Area	Area	Area	Area	Area	Area	Area	Area	Area	Area	Area	Area	Area	Area	Area	Area	Area	Area	Area	Area	Area	Area	Area	Area	Area	Area	Area	Area	Area	Area	Area	Area	Area	Area	Area
_QC00						691636	245317	2.94918e+07	976847	289884	1.32549e+07	2.59959e+06	7.8945e+07	7.29876e+07	3.09227e+06	3.47537e+06	768770	724006	2.41536e+06	4.53443e+07	1.32002e+07	4.69906e+06	2.06882e+06	1.43242e+06	1.47087e+07	1.01176e+06	4.27222e+06	2.16312e+06	1.16612e+06	866921	3.2869e+06	3.10531e+07	3.7568e+07	1.73948e+06	3.12499e+06	5.26768e+06	1.05731e+08	1.52465e+08	5.12493e+07	6.22661e+07	4.99588e+07	9.92296e+06	1.82888e+07
_QC01						505356	240613	2.79472e+07	717974	305063	1.29167e+07	1.55022e+06	7.52687e+07	6.97896e+07	3.58527e+06	3.56521e+06	746438	712905	2.08759e+06	4.36554e+07	1.27103e+07	4.42671e+06	1.9451e+06	1.46687e+06	1.37226e+07	1.00825e+06	4.11705e+06	1.97047e+06	1.25113e+06	849792	2.86468e+06	2.85044e+07	3.45933e+07	1.72394e+06	3.04027e+06	5.64889e+06	1.00302e+08	1.4672e+08	4.86419e+07	5.73616e+07	4.71168e+07	9.56809e+06	1.66056e+07
_QC02						713318	290080	3.09488e+07	883070	331223	1.38417e+07	1.771e+06	8.54138e+07	8.08466e+07	3.93453e+06	3.69606e+06	865698	735403	2.37913e+06	4.86483e+07	1.45399e+07	5.09161e+06	2.22203e+06	1.90837e+06	1.52192e+07	1.15384e+06	4.8153e+06	2.15496e+06	1.16609e+06	930091	3.12693e+06	3.20294e+07	3.98864e+07	1.69199e+06	3.41938e+06	3.88971e+06	1.13265e+08	1.66942e+08	5.34771e+07	6.86988e+07	5.2884e+07	1.03506e+07	1.83734e+07
_QC03						641001	279660	3.17583e+07	820679	297048	1.34602e+07	1.6875e+06	8.37426e+07	7.76267e+07	3.94292e+06	3.67886e+06	876049	742804	2.35098e+06	4.69535e+07	1.44232e+07	4.8669e+06	2.26309e+06	1.56683e+06	1.49619e+07	1.06116e+06	4.66051e+06	2.1595e+06	1.09942e+06	999111	3.052e+06	2.9396e+07	3.81733e+07	2.19683e+06	3.46938e+06	5.54962e+06	1.10386e+08	1.70443e+08	5.13106e+07	6.37922e+07	5.11611e+07	1.05489e+07	1.91054e+07
_QC04						677043	276904	3.36855e+07	811946	338794	1.41935e+07	1.78747e+06	7.9868e+07	7.99282e+07	3.89632e+06	3.4678e+06	918022	800684	2.31811e+06	4.88848e+07	1.53935e+07	4.95068e+06	2.39406e+06	1.5866e+06	1.56548e+07	1.03914e+06	5.27008e+06	2.10466e+06	1.1608e+06	983263	3.33427e+06	3.18184e+07	4.11874e+07	2.01945e+06	3.36108e+06	5.28979e+06	1.20027e+08	1.59543e+08	5.36986e+07	6.50255e+07	5.35488e+07	1.08225e+07	1.84642e+07
_QC05						615310	251594	3.26193e+07	854371	316311	1.36968e+07	1.62058e+06	7.97144e+07	7.5639e+07	3.96474e+06	3.67135e+06	893739	815241	2.24218e+06	4.67951e+07	1.47012e+07	4.81689e+06	2.21133e+06	1.19081e+06	1.47725e+07	1.06385e+06	5.21374e+06	2.24696e+06	1.14773e+06	968524	3.09673e+06	3.14118e+07	3.9778e+07	1.93624e+06	3.33946e+06	6.07132e+06	1.0635e+08	1.53836e+08	5.25931e+07	6.15916e+07	5.33892e+07	1.0381e+07	1.75877e+07
_QC06						693895	294101	3.27579e+07	792384	335446	1.50903e+07	1.65044e+06	8.52048e+07	8.23822e+07	3.82221e+06	4.03909e+06	915679	774918	2.12016e+06	4.87835e+07	1.51486e+07	5.05954e+06	2.41516e+06	1.87741e+06	1.49562e+07	994166	5.78622e+06	2.28771e+06	1.14991e+06	1.01574e+06	3.37351e+06	3.24529e+07	4.15897e+07	2.3868e+06	3.27888e+06	4.90159e+06	1.13309e+08	1.63337e+08	5.44279e+07	6.6175e+07	5.71362e+07	1.10005e+07	1.82726e+07
_QC07						634667	225875	3.203e+07	793729	334672	1.3054e+07	1.61519e+06	7.87671e+07	7.50604e+07	3.42935e+06	4.02281e+06	829427	756842	2.2839e+06	4.83055e+07	1.45914e+07	4.81227e+06	2.34312e+06	1.59943e+06	1.4767e+07	1.06407e+06	5.52528e+06	2.15516e+06	1.08442e+06	921792	3.14617e+06	3.31983e+07	3.87751e+07	2.15715e+06	3.26548e+06	6.31774e+06	1.0767e+08	1.54756e+08	5.12652e+07	6.31164e+07	5.12717e+07	1.02583e+07	1.82055e+07
_QC08						698275	262171	3.36124e+07	873095	387064	1.37696e+07	1.69481e+06	8.25236e+07	8.11534e+07	3.96393e+06	3.99949e+06	909474	765900	2.44599e+06	5.07713e+07	1.52059e+07	4.97269e+06	2.49179e+06	1.40487e+06	1.63176e+07	1.01914e+06	6.01995e+06	2.2507e+06	1.08774e+06	1.0227e+06	3.18895e+06	3.23442e+07	4.1774e+07	2.51533e+06	3.45139e+06	5.11987e+06	1.13099e+08	1.61742e+08	5.40985e+07	6.45351e+07	5.55124e+07	1.10899e+07	1.98293e+07
_QC09						738797	273366	3.18652e+07	816590	358317	1.36995e+07	1.57704e+06	7.98815e+07	7.41564e+07	3.73331e+06	4.01772e+06	888645	737931	2.35032e+06	4.6118e+07	1.46305e+07	4.64838e+06	2.32849e+06	1.53247e+06	1.38969e+07	1.03561e+06	5.83479e+06	1.99019e+06	1.14159e+06	960548	3.11197e+06	3.44377e+07	3.9493e+07	1.82602e+06	3.46311e+06	6.08473e+06	1.07786e+08	1.50498e+08	5.1613e+07	6.24187e+07	5.3125e+07	1.05802e+07	1.78376e+07
_QC10						695369	268888	3.28715e+07	776690	393429	1.36751e+07	1.69186e+06	8.3699e+07	7.9095e+07	3.50548e+06	4.12016e+06	860590	815359	2.23085e+06	4.91905e+07	1.49844e+07	4.71711e+06	2.26447e+06	1.61104e+06	1.57802e+07	1.03915e+06	5.97831e+06	2.17915e+06	1.16887e+06	1.01827e+06	3.23134e+06	3.38726e+07	4.08349e+07	1.88789e+06	3.43444e+06	4.68996e+06	1.12583e+08	1.63113e+08	5.71345e+07	6.69568e+07	5.48907e+07	1.08197e+07	1.74829e+07
_QC11						605950	248431	3.32263e+07	832585	301020	1.31216e+07	1.74995e+06	8.47328e+07	7.97835e+07	3.3851e+06	3.61807e+06	913613	795588	2.47725e+06	4.98466e+07	1.52881e+07	4.80735e+06	2.33048e+06	1.45866e+06	1.58989e+07	1.13397e+06	5.7391e+06	2.29016e+06	1.0525e+06	1.0406e+06	2.8684e+06	3.21803e+07	4.06584e+07	1.86481e+06	3.29063e+06	5.12684e+06	1.13295e+08	1.6165e+08	5.31077e+07	6.58847e+07	5.39391e+07	1.0927e+07	1.77834e+07
_QC12						694114	278717	3.19693e+07	797265	272863	1.40952e+07	1.64201e+06	8.37008e+07	7.48975e+07	3.73097e+06	3.70782e+06	838441	751357	2.38902e+06	4.78898e+07	1.45432e+07	4.56369e+06	2.20138e+06	1.60398e+06	1.45984e+07	1.16551e+06	5.53503e+06	2.14915e+06	1.16546e+06	929684	2.87336e+06	2.87983e+07	3.94672e+07	1.93693e+06	3.04345e+06	5.14788e+06	1.08969e+08	1.56118e+08	5.3185e+07	6.49311e+07	5.27459e+07	1.01586e+07	1.71494e+07
_QC13						708269	265747	3.19173e+07	777116	313668	1.3967e+07	1.66783e+06	8.17673e+07	7.80456e+07	3.73686e+06	4.19688e+06	836988	740583	2.37824e+06	4.82055e+07	1.44438e+07	4.65116e+06	2.21205e+06	1.37411e+06	1.52213e+07	958498	5.3146e+06	2.05977e+06	1.21441e+06	941758	3.28637e+06	2.72513e+07	4.00505e+07	1.82504e+06	3.21438e+06	5.28597e+06	1.13698e+08	1.57129e+08	5.26293e+07	6.43287e+07	5.21883e+07	9.9957e+06	1.804e+07
_QC14						657772	302095	3.30388e+07	859445	288975	1.30201e+07	1.68186e+06	7.843e+07	7.73269e+07	3.58167e+06	3.72995e+06	893689	770102	2.3203e+06	4.6793e+07	1.46555e+07	4.83775e+06	2.33584e+06	1.61571e+06	1.54902e+07	1.0077e+06	5.09349e+06	2.25241e+06	969737	948939	3.17177e+06	3.16548e+07	3.87986e+07	2.35878e+06	3.34532e+06	5.83982e+06	1.06214e+08	1.55147e+08	5.24378e+07	6.33892e+07	5.05149e+07	1.0084e+07	1.87134e+07
_QC15						612258	286474	3.26996e+07	823200	295318	1.37246e+07	1.71005e+06	8.31876e+07	7.70794e+07	3.3694e+06	3.63477e+06	869205	775049	2.40104e+06	4.6726e+07	1.4352e+07	4.97649e+06	2.25507e+06	1.60623e+06	1.51258e+07	1.1085e+06	4.90693e+06	2.23072e+06	1.07865e+06	898847	3.11592e+06	3.27127e+07	3.99712e+07	1.78523e+06	3.36972e+06	4.9685e+06	1.09762e+08	1.57216e+08	5.32447e+07	6.42696e+07	5.15835e+07	1.03665e+07	1.82084e+07
_QC16						658696	246543	3.11415e+07	794088	242433	1.27874e+07	1.66369e+06	7.99876e+07	7.44592e+07	4.15531e+06	3.28512e+06	808998	725874	2.26707e+06	4.62989e+07	1.39232e+07	4.60716e+06	2.19227e+06	1.65437e+06	1.44051e+07	1.02249e+06	4.82705e+06	2.18304e+06	995479	865686	2.97232e+06	2.72417e+07	3.84326e+07	1.70208e+06	3.18937e+06	5.49297e+06	1.07301e+08	1.54847e+08	5.18508e+07	6.11656e+07	5.01187e+07	9.92247e+06	1.73912e+07
_QC17						709521	239718	3.09234e+07	863321	325307	1.44624e+07	1.68233e+06	8.14868e+07	7.79332e+07	3.67085e+06	3.60446e+06	938733	790659	2.34209e+06	4.63119e+07	1.41838e+07	4.87693e+06	2.32055e+06	1.721e+06	1.49114e+07	1.00341e+06	5.59877e+06	2.20714e+06	1.06913e+06	929427	3.09017e+06	2.9262e+07	3.98074e+07	1.83244e+06	3.08492e+06	5.01904e+06	1.13369e+08	1.59125e+08	4.93445e+07	6.80948e+07	5.27665e+07	1.02817e+07	1.87523e+07
_QC18						587023	261106	3.23064e+07	875367	341564	1.12928e+07	1.6138e+06	8.22264e+07	7.71595e+07	4.01489e+06	3.58562e+06	801076	711740	2.15999e+06	4.73666e+07	1.41346e+07	4.63823e+06	2.26857e+06	1.22253e+06	1.51122e+07	1.05689e+06	4.84657e+06	2.03155e+06	1.30959e+06	955778	3.20135e+06	3.16626e+07	3.77558e+07	1.68929e+06	3.36299e+06	4.96692e+06	1.09256e+08	1.58806e+08	5.28052e+07	6.13904e+07	5.31656e+07	1.07493e+07	1.70797e+07
_QC19						612448	229586	3.09001e+07	910332	363738	1.42979e+07	1.77835e+06	7.86736e+07	7.62011e+07	3.83591e+06	3.98748e+06	821531	782525	2.18349e+06	4.69672e+07	1.48632e+07	4.73847e+06	2.17434e+06	1.632e+06	1.43064e+07	1.05632e+06	5.07065e+06	2.07052e+06	1.156e+06	924532	3.30061e+06	3.28213e+07	3.76058e+07	2.01312e+06	3.25053e+06	5.3525e+06	1.09273e+08	1.55727e+08	5.22002e+07	6.26614e+07	5.30162e+07	1.0355e+07	1.92141e+07
_QC20						672592	296048	2.91211e+07	782257	341458	1.49674e+07	2.48854e+06	7.98625e+07	7.63085e+07	3.31367e+06	3.55427e+06	823711	728954	2.36167e+06	4.72807e+07	1.37146e+07	5.18125e+06	2.10385e+06	1.64904e+06	1.48776e+07	1.07338e+06	4.65025e+06	2.14823e+06	1.32314e+06	999396	3.14666e+06	3.34297e+07	3.89057e+07	2.32639e+06	3.4882e+06	5.49384e+06	1.0766e+08	1.64602e+08	5.18456e+07	6.25172e+07	5.02988e+07	1.04059e+07	1.81276e+07
_QC21						449251	268210	3.17214e+07	823907	314871	1.33265e+07	2.71155e+06	8.13164e+07	7.73069e+07	3.75474e+06	3.80476e+06	908605	783907	2.6597e+06	4.93497e+07	1.44338e+07	5.17697e+06	2.26054e+06	1.68474e+06	1.5276e+07	1.13518e+06	5.13603e+06	2.34216e+06	1.17702e+06	973991	3.49973e+06	3.06776e+07	4.00313e+07	1.90193e+06	3.05589e+06	5.20947e+06	1.13045e+08	1.59856e+08	5.4155e+07	6.45636e+07	5.44012e+07	1.06537e+07	1.82631e+07
_QC22						753813	259434	3.04056e+07	815199	292876	1.33386e+07	1.53846e+06	7.95201e+07	7.4326e+07	3.48088e+06	3.52039e+06	814273	738378	2.2344e+06	4.62929e+07	1.41886e+07	4.65152e+06	2.21559e+06	1.51297e+06	1.48049e+07	978078	4.96685e+06	2.09592e+06	1.06437e+06	871385	2.84016e+06	2.97073e+07	3.85366e+07	2.1613e+06	3.10452e+06	6.1124e+06	1.04216e+08	1.55167e+08	5.01519e+07	6.06965e+07	4.25465e+07	1.01649e+07	1.81437e+07
_QC23						553813	254666	3.19153e+07	894073	355459	1.50409e+07	1.7225e+06	8.49185e+07	7.91892e+07	4.81617e+06	4.104e+06	891959	778019	2.24212e+06	4.80228e+07	1.43458e+07	4.81738e+06	2.24195e+06	1.54705e+06	1.58739e+07	1.07087e+06	5.27493e+06	2.2078e+06	1.13334e+06	955819	3.44856e+06	2.97813e+07	4.03395e+07	2.3808e+06	3.41601e+06	5.08433e+06	1.10712e+08	1.64292e+08	5.33447e+07	6.54803e+07	5.56461e+07	1.05317e+07	1.85168e+07
_QC24						819591	296505	3.20366e+07	804310	347075	1.55438e+07	1.56462e+06	7.79481e+07	7.5118e+07	3.38194e+06	3.87568e+06	863054	770590	2.02979e+06	4.72196e+07	1.42299e+07	4.83036e+06	2.22776e+06	1.47465e+06	1.46757e+07	986535	5.33145e+06	2.10857e+06	1.09e+06	968219	3.26032e+06	3.20022e+07	3.85919e+07	1.53791e+06	3.59589e+06	5.40117e+06	1.06857e+08	1.55706e+08	5.25762e+07	6.2217e+07	5.3566e+07	1.00805e+07	1.7477e+07
_QC25						730669	250214	3.27678e+07	789171	322083	1.08665e+07	1.60762e+06	8.10467e+07	8.02524e+07	3.68263e+06	3.54823e+06	857726	734944	2.31095e+06	4.67009e+07	1.45514e+07	4.77064e+06	2.31061e+06	1.50291e+06	1.46263e+07	1.03752e+06	5.07654e+06	2.12986e+06	1.22584e+06	971661	2.25836e+06	3.03945e+07	3.94247e+07	1.90316e+06	3.74301e+06	4.99784e+06	1.13848e+08	1.55542e+08	5.31722e+07	6.62485e+07	5.44418e+07	1.01215e+07	1.80121e+07
_QC26						554563	259984	3.25407e+07	830176	266362	1.34343e+07	1.63096e+06	8.38198e+07	7.59734e+07	3.7241e+06	3.59062e+06	818816	780304	2.34443e+06	4.74526e+07	1.50387e+07	4.65399e+06	2.27918e+06	1.60738e+06	1.41767e+07	1.03729e+06	5.14519e+06	1.97508e+06	1.12122e+06	1.03248e+06	3.44525e+06	3.16352e+07	3.92416e+07	1.95238e+06	3.05284e+06	5.04143e+06	1.09849e+08	1.59359e+08	5.19164e+07	6.44357e+07	5.46289e+07	1.05375e+07	1.77626e+07
_QC27						751168	251991	3.18145e+07	904952	389272	1.22832e+07	1.54593e+06	7.87982e+07	7.60156e+07	2.70944e+06	3.71079e+06	791411	739869	2.38165e+06	4.83846e+07	1.44507e+07	4.62604e+06	2.25686e+06	1.7055e+06	1.49023e+07	1.04005e+06	5.3999e+06	2.12613e+06	1.22616e+06	943566	3.20611e+06	3.7087e+07	3.84222e+07	1.71133e+06	3.28368e+06	5.3149e+06	1.10053e+08	1.58093e+08	5.15569e+07	6.32829e+07	5.23117e+07	1.07067e+07	1.86053e+07
_QC28						724764	271514	3.10832e+07	744009	327629	1.36524e+07	1.58042e+06	8.22999e+07	7.72219e+07	3.34625e+06	3.962e+06	896850	740349	2.28076e+06	4.53608e+07	1.44964e+07	4.80914e+06	2.23653e+06	1.47079e+06	1.46783e+07	1.18157e+06	5.27344e+06	2.18103e+06	1.14121e+06	905518	3.28134e+06	3.23862e+07	3.91336e+07	2.03934e+06	3.13159e+06	5.19092e+06	1.12476e+08	1.59318e+08	5.26983e+07	6.3246e+07	5.33273e+07	1.06305e+07	1.81091e+07
_QC29						613016	268999	3.13395e+07	851841	284382	1.54732e+07	1.41203e+06	8.19243e+07	7.74433e+07	3.41587e+06	3.43898e+06	873794	762703	2.27114e+06	4.70589e+07	1.48613e+07	4.82856e+06	2.27035e+06	1.33818e+06	1.58243e+07	1.00784e+06	5.47128e+06	2.16025e+06	1.17957e+06	888025	2.7477e+06	3.29463e+07	3.92774e+07	1.8512e+06	3.29432e+06	5.09075e+06	1.10626e+08	1.50498e+08	5.18009e+07	6.31947e+07	5.25791e+07	1.06646e+07	1.79427e+07
_QC30						698393	261604	3.21811e+07	836751	303650	1.36279e+07	1.60178e+06	8.38686e+07	8.03081e+07	4.30429e+06	3.71988e+06	862544	744115	2.33674e+06	4.79568e+07	1.46413e+07	4.76328e+06	2.29501e+06	1.7588e+06	1.5162e+07	1.12399e+06	5.43076e+06	2.14147e+06	1.08737e+06	1.0264e+06	3.13743e+06	3.09153e+07	4.03941e+07	2.30059e+06	3.09981e+06	5.01722e+06	1.13223e+08	1.6446e+08	5.33734e+07	6.83144e+07	5.32944e+07	1.04323e+07	1.80545e+07
_QC31						656446	280588	3.14643e+07	831905	313776	1.29285e+07	1.62486e+06	7.91014e+07	7.60112e+07	3.84015e+06	3.48726e+06	794411	736736	2.23928e+06	4.79535e+07	1.41321e+07	4.62188e+06	2.31112e+06	1.46725e+06	1.45508e+07	1.03925e+06	5.1805e+06	2.2557e+06	1.04422e+06	909945	3.19977e+06	2.53879e+07	3.79696e+07	2.00133e+06	3.42945e+06	5.48188e+06	1.07665e+08	1.60252e+08	5.18287e+07	6.18737e+07	5.12074e+07	1.00132e+07	1.91141e+07
_QC32						646749	279755	3.23396e+07	832039	321470	1.40889e+07	1.66299e+06	8.16131e+07	7.68386e+07	3.79201e+06	3.82593e+06	859996	749597	2.21646e+06	4.81262e+07	1.46397e+07	4.70622e+06	2.19536e+06	1.60523e+06	1.52837e+07	960056	5.13992e+06	2.15523e+06	1.20081e+06	952634	3.09391e+06	3.24406e+07	3.87462e+07	1.9153e+06	3.35188e+06	5.72599e+06	1.07998e+08	1.56053e+08	5.36488e+07	6.30057e+07	5.2031e+07	1.02568e+07	1.84369e+07
_QC33						599851	240318	3.12362e+07	833091	354279	1.36835e+07	2.65278e+06	8.05922e+07	7.55925e+07	3.83392e+06	4.10681e+06	920925	817135	2.4801e+06	4.74e+07	1.39687e+07	5.23057e+06	2.20897e+06	1.57644e+06	1.49876e+07	1.06838e+06	4.86628e+06	2.15469e+06	1.13965e+06	964181	3.33991e+06	3.16993e+07	4.06795e+07	1.98292e+06	3.33336e+06	5.37121e+06	1.09007e+08	1.58969e+08	5.20715e+07	6.33226e+07	5.11851e+07	1.05236e+07	1.71169e+07
CS25034	264 B1 d14	untreated d14	264	OvC8		41445.1	137820	3.14304e+07	298700	52201.3	1.17395e+07	1.76444e+06	8.3466e+07	6.63878e+07	3.9606e+06	3.74544e+06	271063	254798	2.19854e+06	6.5036e+07	1.42642e+07	5.04506e+06	2.23843e+06	1.0327e+06	1.41298e+07	962141	5.59298e+06	2.03237e+06	1.49365e+06	616244	1.3733e+06	2.26728e+07	2.5041e+07	2.99869e+06	1.69551e+06	3.82877e+06	2.35495e+06	1.90945e+06	3.8445e+06	4.84229e+06	2.21074e+07	1.36663e+07	1.83129e+07
CS25035	264 B2 d14	untreated d14	264	OvC8		67721.2	117659	3.12537e+07	285892	66218.3	8.68596e+06	1.94319e+06	7.91835e+07	6.72551e+07	4.03231e+06	3.23341e+06	270622	256754	1.85796e+06	8.95285e+07	1.40214e+07	5.32323e+06	2.10203e+06	1.356e+06	1.2765e+07	1.13906e+06	4.90726e+06	2.12999e+06	1.80166e+06	631857	1.23417e+06	1.91364e+07	2.47997e+07	3.09328e+06	1.78582e+06	3.5886e+06	2.30022e+06	2.00886e+06	3.57975e+06	3.64586e+06	2.4019e+07	1.35138e+07	1.59031e+07
CS25036	264 B1 d21	untreated d21	264	OvC8		38143.8	31693.4	3.31803e+07	293561	419741	9.61416e+06	2.03003e+06	8.63745e+07	6.46092e+07	2.94891e+06	3.85404e+06	303944	471848	2.39935e+06	7.65747e+07	1.50502e+07	5.68303e+06	2.36203e+06	1.43198e+06	1.57443e+07	1.12412e+06	6.35018e+06	2.34069e+06	1.20877e+06	917479	1.55676e+06	1.90903e+07	4.02158e+07	2.15225e+06	2.77727e+06	5.05781e+06	2.59637e+06	1.9672e+06	4.41836e+06	4.37025e+06	1.87051e+07	8.0335e+06	1.89893e+07
CS25037	264 B2 d21	untreated d21	264	OvC8		53253.1	29008.8	3.11187e+07	264855	338608	8.19732e+06	1.99687e+06	7.55838e+07	5.61157e+07	3.55355e+06	2.66874e+06	227744	403383	2.11967e+06	8.0993e+07	1.42088e+07	5.44704e+06	2.31342e+06	1.00352e+06	1.38032e+07	1.34675e+06	4.88446e+06	1.98446e+06	1.16681e+06	853906	1.279e+06	1.50162e+07	3.86465e+07	1.78851e+06	2.79793e+06	4.3447e+06	2.64687e+06	2.34541e+06	4.42813e+06	4.88097e+06	1.9937e+07	7.20292e+06	1.91202e+07
CS25038	264 C1 d14	carboplatin d14	264	OvC8		53035.1	123495	3.10853e+07	275014	51561.9	1.29732e+07	1.62107e+06	8.52082e+07	6.2206e+07	4.26376e+06	4.10208e+06	272462	308518	2.20254e+06	5.73295e+07	1.43394e+07	5.12298e+06	2.27824e+06	1.32238e+06	1.45279e+07	616925	5.5319e+06	2.34249e+06	1.69186e+06	643584	1.18259e+06	2.98403e+07	2.50727e+07	1.89711e+06	2.41809e+06	3.61997e+06	2.2737e+06	2.00692e+06	3.94374e+06	3.84682e+06	3.7006e+07	1.43264e+07	2.0047e+07
CS25039	264 C2 d14	carboplatin d14	264	OvC8		28386.4	196091	2.93288e+07	199879	38588.4	1.1337e+07	1.58274e+06	7.68624e+07	6.49454e+07	2.07197e+06	3.30956e+06	148081	328320	1.93322e+06	5.43717e+07	1.37418e+07	4.83616e+06	2.15974e+06	885371	1.32811e+07	587200	5.87184e+06	2.39775e+06	1.1201e+06	662001	1.17342e+06	3.30089e+07	2.44091e+07	1.81939e+06	2.47259e+06	3.00644e+06	2.84597e+06	2.3006e+06	4.69127e+06	4.80125e+06	5.31229e+07	1.39552e+07	1.74841e+07
CS25040	264 C1 d21	carboplatin d21	264	OvC8		32432.8	33853.7	3.3377e+07	360433	250804	1.18502e+07	1.65725e+06	9.3572e+07	6.26506e+07	4.18295e+06	4.8928e+06	104065	475489	2.39027e+06	3.98184e+07	1.52956e+07	5.49445e+06	2.48101e+06	1.77077e+06	1.77036e+07	281047	5.54179e+06	2.32567e+06	1.01909e+06	919583	1.62847e+06	3.77474e+07	3.87804e+07	1.44092e+06	2.47084e+06	4.20265e+06	2.50232e+06	2.12754e+06	3.86365e+06	4.41303e+06	3.55776e+07	9.90869e+06	2.31263e+07
CS25041	264 C2 d21	carboplatin d21	264	OvC8		55450.5	32742.2	3.04322e+07	311163	146414	1.28238e+07	1.68431e+06	8.66815e+07	5.87159e+07	4.20035e+06	4.6229e+06	73792.6	466143	2.21214e+06	2.22057e+07	1.37993e+07	4.57399e+06	2.09916e+06	1.4975e+06	1.63253e+07	233664	5.07255e+06	2.28252e+06	469442	792742	1.33639e+06	3.1368e+07	3.47821e+07	1.02579e+06	2.10479e+06	4.50217e+06	2.97441e+06	2.45388e+06	4.20772e+06	4.75406e+06	4.17524e+07	8.01504e+06	1.8517e+07
CS25042	264 D1 d14	paclitaxel d14	264	OvC8		1.82195e+06	132634	3.11573e+07	198920	75238.6	1.28277e+07	1.46721e+06	8.16241e+07	6.46858e+07	3.69865e+06	3.94577e+06	552300	337738	2.01058e+06	6.50577e+07	1.43792e+07	5.10156e+06	2.24576e+06	827283	1.25208e+07	1.03121e+06	5.76865e+06	2.23291e+06	1.82464e+06	673839	826287	2.0437e+07	2.41153e+07	2.6196e+06	1.74949e+06	3.63771e+06	2.09202e+08	2.82669e+08	7.65882e+07	1.00375e+08	3.08788e+07	1.39541e+07	1.7538e+07
CS25043	264 D2 d14	paclitaxel d14	264	OvC8		2.34906e+06	163103	3.04513e+07	176669	69263.9	1.15697e+07	1.57011e+06	7.75941e+07	6.17013e+07	1.77234e+06	3.63425e+06	272597	340179	1.94861e+06	5.03554e+07	1.34737e+07	4.32709e+06	2.07357e+06	1.54901e+06	1.27846e+07	676315	6.35448e+06	2.22831e+06	1.40636e+06	642544	936088	1.30891e+07	2.46372e+07	2.17555e+06	1.86347e+06	3.43281e+06	1.81622e+08	2.84671e+08	7.33178e+07	9.31896e+07	3.81334e+07	1.28171e+07	1.76367e+07
CS25044	264 D1 d21	paclitaxel d21	264	OvC8		2.32975e+06	68250.6	3.09067e+07	401499	565981	1.0006e+07	1.64075e+06	8.64868e+07	5.93183e+07	3.5349e+06	3.68337e+06	414470	346152	2.44739e+06	5.34055e+07	1.42639e+07	5.49026e+06	2.34774e+06	1.25723e+06	1.57835e+07	894673	5.8002e+06	2.24315e+06	1.12545e+06	883128	1.57426e+06	1.74698e+07	3.77863e+07	1.53751e+06	2.43331e+06	4.47003e+06	2.21573e+08	3.3287e+08	8.74162e+07	1.12292e+08	1.95505e+07	7.65704e+06	1.72784e+07
CS25045	264 D2 d21	paclitaxel d21	264	OvC8		1.93505e+06	277016	3.27968e+07	305895	322735	6.8273e+06	1.62667e+06	6.84806e+07	5.56829e+07	3.15907e+06	3.02263e+06	165696	420714	2.41011e+06	4.52795e+07	1.49201e+07	4.8929e+06	2.33454e+06	1.14742e+06	1.47352e+07	498983	5.80524e+06	2.21756e+06	794648	927963	1.58568e+06	2.34872e+07	3.75272e+07	1.39099e+06	2.59635e+06	4.90277e+06	2.24954e+08	3.28877e+08	9.02483e+07	1.1573e+08	2.53907e+07	7.24872e+06	1.67871e+07
CS25046	264 E1 d14	carboplatin + paclitaxel d14	264	OvC8		2.68977e+06	638620	3.42859e+07	535207	41829.2	1.36704e+07	1.87892e+06	9.0167e+07	8.01073e+07	4.18202e+06	3.80362e+06	466050	390200	2.45609e+06	9.72942e+07	1.54743e+07	6.80619e+06	2.44909e+06	962490	1.54117e+07	1.63045e+06	5.54167e+06	2.04764e+06	2.42761e+06	721613	2.26327e+06	2.52063e+07	2.99183e+07	3.30464e+06	2.26551e+06	4.10133e+06	2.50207e+08	3.73668e+08	9.59465e+07	1.24235e+08	8.68411e+07	1.69651e+07	1.91365e+07
CS25047	264 E2 d14	carboplatin + paclitaxel d14	264	OvC8		2.6057e+06	441569	3.06738e+07	415253	37856	9.84095e+06	1.40792e+06	7.94189e+07	7.17112e+07	3.59432e+06	3.2125e+06	385800	340494	2.03371e+06	8.3173e+07	1.39028e+07	5.62582e+06	1.99342e+06	1.14972e+06	1.41975e+07	1.03622e+06	6.2514e+06	2.13583e+06	1.68656e+06	652359	1.78801e+06	2.13714e+07	2.45614e+07	3.32039e+06	1.56505e+06	3.67676e+06	2.02285e+08	3.03601e+08	7.996e+07	1.03641e+08	7.76829e+07	1.48636e+07	1.81057e+07
CS25048	264 E1 d21	carboplatin + paclitaxel d21	264	OvC8		1.92744e+06	117269	3.44106e+07	592522	254231	1.05412e+07	1.71765e+06	8.2675e+07	6.03055e+07	3.63318e+06	4.16657e+06	148244	530070	2.39573e+06	5.9419e+07	1.55429e+07	6.38867e+06	2.3439e+06	1.10962e+06	1.59035e+07	386136	6.1216e+06	2.16401e+06	1.48309e+06	857617	2.25411e+06	1.91834e+07	4.20483e+07	1.7847e+06	2.64863e+06	5.26933e+06	2.24782e+08	3.3131e+08	8.68121e+07	1.11736e+08	5.13474e+07	8.58241e+06	2.03093e+07
CS25049	264 E2 d21	carboplatin + paclitaxel d21	264	OvC8		2.27378e+06	151828	3.03514e+07	308976	156925	8.70091e+06	1.66779e+06	7.67072e+07	5.51424e+07	4.046e+06	3.38126e+06	161564	412928	2.16952e+06	5.7924e+07	1.41462e+07	5.42155e+06	2.13409e+06	871439	1.42233e+07	359691	5.06786e+06	2.3004e+06	1.33527e+06	802431	1.41177e+06	1.6508e+07	3.48663e+07	1.2902e+06	2.41964e+06	3.63148e+06	1.91374e+08	3.02231e+08	7.56254e+07	9.46566e+07	4.1659e+07	7.32945e+06	1.81543e+07
CS25050	265 B1 d14	untreated d14	265	OvC5		29778.5	283502	3.02779e+07	219346	46574	8.82913e+06	1.87868e+06	7.71037e+07	6.94752e+07	3.94684e+06	3.19089e+06	34830.6	403746	1.83095e+06	8.62895e+07	1.39004e+07	4.26167e+06	2.15338e+06	1.22241e+06	1.48219e+07	3.32039e+06	5.46332e+06	2.17046e+06	2.6695e+06	654740	918135	1.55972e+07	2.58348e+07	3.93068e+06	1.88885e+06	3.79591e+06	2.38994e+06	1.86194e+06	3.75515e+06	4.23754e+06	3.88244e+07	1.36399e+07	1.82455e+07
CS25051	265 B2 d14	untreated d14	265	OvC5		55375.1	299753	2.75687e+07	146430	53223.5	1.02688e+07	1.66527e+06	7.41423e+07	6.50058e+07	3.81645e+06	2.42374e+06	41261	290475	1.74439e+06	7.1414e+07	1.28773e+07	4.24884e+06	2.0337e+06	996842	1.2909e+07	3.77638e+06	5.56154e+06	2.07358e+06	2.18184e+06	672691	793943	1.42654e+07	2.5289e+07	2.93078e+06	1.82994e+06	3.40128e+06	2.21639e+06	1.85598e+06	3.58651e+06	4.45558e+06	3.44408e+07	1.30117e+07	1.61881e+07
CS25052	265 B1 d21	untreated d21	265	OvC5		53190.4	110326	3.18622e+07	260219	399481	9.6493e+06	1.78813e+06	7.74303e+07	5.52618e+07	5.00861e+06	2.82391e+06	40759.7	302340	2.0023e+06	4.57996e+07	1.46134e+07	4.59747e+06	2.33235e+06	1.32805e+06	1.54698e+07	3.49045e+06	5.6609e+06	2.18346e+06	1.69611e+06	928738	958486	1.47067e+07	3.83968e+07	2.35164e+06	3.0584e+06	4.3024e+06	3.1887e+06	2.54795e+06	5.63623e+06	6.28006e+06	2.07784e+07	7.60337e+06	1.73878e+07
CS25053	265 B2 d21	untreated d21	265	OvC5		147252	172878	2.89613e+07	132490	300295	8.26669e+06	1.7329e+06	6.49415e+07	4.92289e+07	4.0291e+06	2.57585e+06	62644.6	269984	1.84725e+06	4.49193e+07	1.30458e+07	4.18031e+06	2.03809e+06	975103	1.38682e+07	3.09013e+06	5.1481e+06	2.30258e+06	1.21298e+06	880975	775956	1.36661e+07	3.57597e+07	1.58619e+06	2.61313e+06	4.03567e+06	3.57245e+06	2.82539e+06	5.9986e+06	6.31368e+06	1.8737e+07	6.68704e+06	2.04595e+07
CS25054	265 C1 d14	carboplatin d14	265	OvC5		29141.1	669018	3.09278e+07	173914	31805.1	1.05189e+07	1.72496e+06	7.89733e+07	6.77743e+07	4.40616e+06	3.53409e+06	41527.5	446339	1.58645e+06	6.34495e+07	1.39429e+07	4.38876e+06	2.20957e+06	857499	1.40147e+07	3.36717e+06	5.74808e+06	2.44848e+06	4.30825e+06	714658	678822	1.73185e+07	2.52793e+07	3.6518e+06	2.26076e+06	3.62993e+06	2.16535e+06	1.83135e+06	3.48946e+06	2.88249e+06	5.74431e+07	1.36603e+07	1.95039e+07
CS25055	265 C2 d14	carboplatin d14	265	OvC5		52374.9	564159	2.87889e+07	151958	34472.7	1.0083e+07	1.38839e+06	7.2118e+07	6.39488e+07	3.80333e+06	3.31938e+06	12332.5	318572	1.76329e+06	5.49037e+07	1.33896e+07	4.09412e+06	1.99288e+06	830651	1.28092e+07	2.75202e+06	5.32655e+06	2.28005e+06	3.11217e+06	679224	842176	1.70802e+07	2.37923e+07	2.8995e+06	2.22646e+06	3.12962e+06	2.46057e+06	1.97214e+06	3.48524e+06	4.32612e+06	5.01932e+07	1.33289e+07	1.68684e+07
CS25056	265 C1 d21	carboplatin d21	265	OvC5		55551.4	103151	3.12978e+07	300647	163700	9.8273e+06	1.72988e+06	8.52536e+07	5.65436e+07	2.57371e+06	5.05516e+06	10108.9	496564	2.27349e+06	1.22646e+07	1.43299e+07	4.81058e+06	2.19962e+06	1.64224e+06	1.63781e+07	528697	5.37064e+06	2.25021e+06	760698	859421	1.4439e+06	2.45293e+07	3.73181e+07	1.25483e+06	2.28304e+06	4.96009e+06	2.8013e+06	2.32226e+06	4.20765e+06	5.1696e+06	3.80673e+07	7.4725e+06	2.01708e+07
CS25057	265 C2 d21	carboplatin d21	265	OvC5		121049	156762	3.1189e+07	278330	237701	9.10582e+06	1.71199e+06	8.3244e+07	5.44187e+07	4.13601e+06	4.20119e+06	47886.8	406297	2.06431e+06	1.93738e+07	1.42633e+07	4.65489e+06	2.16177e+06	1.53005e+06	1.59108e+07	626973	5.57327e+06	2.35765e+06	833397	854343	1.21449e+06	2.72655e+07	3.80486e+07	1.2704e+06	2.33568e+06	4.16544e+06	4.19848e+06	4.37719e+06	4.80962e+06	5.91155e+06	3.60527e+07	7.95181e+06	1.86236e+07
CS25058	265 D1 d14	paclitaxel d14	265	OvC5		2.55376e+06	647341	2.87762e+07	156103	41064.1	6.51068e+06	1.66114e+06	8.15647e+07	7.55925e+07	3.48576e+06	2.76571e+06	40534.7	464452	1.94245e+06	8.94136e+07	1.33891e+07	4.4783e+06	2.09564e+06	1.0281e+06	1.33307e+07	5.39993e+06	4.96555e+06	2.14365e+06	2.89491e+06	743094	798962	1.43132e+07	2.75911e+07	4.04629e+06	2.03169e+06	3.88401e+06	2.09505e+08	3.10934e+08	8.01312e+07	1.05335e+08	5.64585e+07	1.44729e+07	1.61956e+07
CS25059	265 D2 d14	paclitaxel d14	265	OvC5		2.23606e+06	891158	2.91442e+07	155761	63869.2	1.07914e+07	1.55316e+06	7.37377e+07	7.59073e+07	4.05486e+06	2.20008e+06	122699	474539	1.65424e+06	1.24903e+08	1.33151e+07	4.10184e+06	2.07752e+06	865344	1.20477e+07	4.96179e+06	5.94178e+06	1.97421e+06	2.92228e+06	689020	711026	1.48499e+07	2.72015e+07	4.45186e+06	2.08475e+06	3.82102e+06	2.00236e+08	2.97808e+08	7.88963e+07	1.01947e+08	5.4807e+07	1.45868e+07	2.02898e+07
CS25060	265 D1 d21	paclitaxel d21	265	OvC5		2.27111e+06	427036	2.95476e+07	348572	509400	9.81366e+06	1.72874e+06	6.95984e+07	5.15532e+07	3.73554e+06	3.41712e+06	58619.6	270903	2.13844e+06	3.921e+07	1.39628e+07	4.52941e+06	2.17437e+06	1.13069e+06	1.47626e+07	3.02978e+06	5.38729e+06	2.15768e+06	1.61477e+06	921330	1.47922e+06	1.34653e+07	3.77218e+07	2.08078e+06	2.93515e+06	4.53441e+06	2.36222e+08	3.53602e+08	9.04151e+07	1.12731e+08	2.32674e+07	7.88229e+06	1.68274e+07
CS25061	265 D2 d21	paclitaxel d21	265	OvC5		2.33266e+06	566066	2.9204e+07	156035	316583	9.1181e+06	1.61938e+06	6.36765e+07	5.23759e+07	3.46639e+06	3.07229e+06	108258	429041	1.98948e+06	6.32918e+07	1.31402e+07	4.38435e+06	2.05195e+06	991424	1.27892e+07	2.88216e+06	5.37166e+06	2.12158e+06	1.60252e+06	894224	1.13499e+06	1.26219e+07	3.70929e+07	2.44453e+06	2.65559e+06	4.23912e+06	2.38359e+08	3.54847e+08	9.06634e+07	1.19483e+08	2.87414e+07	7.53546e+06	1.61511e+07
CS25062	265 E1 d14	carboplatin + paclitaxel d14	265	OvC5		348229	402255	3.48872e+07	643415	47607.6	1.22677e+07	1.65308e+06	9.07747e+07	7.76951e+07	3.67169e+06	4.90586e+06	41394.6	338990	2.21004e+06	1.36602e+07	1.60378e+07	5.63631e+06	2.52729e+06	1.52903e+06	1.98463e+07	1.44737e+06	5.55106e+06	2.20289e+06	1.75228e+06	746647	2.02698e+06	3.52642e+07	2.69784e+07	1.41088e+06	2.37023e+06	4.11202e+06	2.26773e+08	3.42614e+08	8.6947e+07	1.12154e+08	7.61308e+07	1.54848e+07	2.05992e+07
CS25063	265 E2 d14	carboplatin + paclitaxel d14	265	OvC5		247787	279842	3.11426e+07	460470	40343.4	1.00293e+07	1.34547e+06	8.07917e+07	6.63443e+07	3.94964e+06	5.41846e+06	41609.2	293150	2.23274e+06	6.06024e+06	1.3869e+07	5.07398e+06	2.17468e+06	1.44981e+06	1.70352e+07	955078	5.17232e+06	2.34073e+06	915385	630955	1.93124e+06	3.96637e+07	2.38218e+07	1.18477e+06	1.85691e+06	3.75086e+06	2.21494e+08	3.31091e+08	8.40703e+07	1.08607e+08	6.40946e+07	1.36888e+07	1.70161e+07
CS25064	265 E1 d21	carboplatin + paclitaxel d21	265	OvC5		93090.8	114020	3.4959e+07	620918	155277	1.54683e+07	1.33727e+06	1.0294e+08	6.74953e+07	3.5008e+06	5.93542e+06	42015.4	563127	2.65249e+06	3.38174e+06	1.61098e+07	6.66118e+06	2.47944e+06	1.86232e+06	2.18982e+07	198994	5.35631e+06	2.15375e+06	181662	980657	2.90307e+06	6.00815e+07	3.96605e+07	1.00065e+06	2.31347e+06	4.80475e+06	2.31248e+08	3.47182e+08	8.96226e+07	1.11799e+08	5.92641e+07	9.05705e+06	1.87703e+07
CS25065	265 E2 d21	carboplatin + paclitaxel d21	265	OvC5		56276.7	62766.3	3.20006e+07	623423	468621	1.63527e+07	817742	9.27482e+07	5.92881e+07	3.71422e+06	5.1706e+06	11433.4	337191	2.43244e+06	854765	1.44142e+07	6.01582e+06	2.20475e+06	1.69798e+06	2.01783e+07	118154	4.96073e+06	2.2244e+06	22804.5	807096	2.2362e+06	8.41349e+07	3.60763e+07	708366	2.06385e+06	4.75806e+06	1.9622e+08	2.8898e+08	7.74528e+07	1.01349e+08	2.07735e+07	8.19994e+06	1.93894e+07
CS25066	268 B1 d14	untreated d14	268	OvC1		42882.4	70623.5	3.08674e+07	250347	652876	5.55017e+06	2.01382e+06	3.96899e+07	2.65737e+07	4.00068e+06	2.5017e+06	1.20048e+06	259374	2.05088e+06	9.03548e+07	1.44848e+07	5.96747e+06	2.28735e+06	1.07874e+06	1.33652e+07	231576	5.13907e+06	2.15617e+06	863738	911024	1.28962e+06	7.76822e+06	3.8152e+07	2.07068e+06	2.66033e+06	4.38e+06	2.788e+06	2.26747e+06	5.22118e+06	5.76048e+06	7.49362e+06	3.9611e+06	1.74776e+07
CS25067	268 B2 d14	untreated d14	268	OvC1		65499.3	66641.9	3.09261e+07	274688	672437	5.2033e+06	1.94256e+06	3.99518e+07	2.75076e+07	3.4051e+06	3.11024e+06	757460	234885	2.33341e+06	5.89129e+07	1.40527e+07	4.87414e+06	2.12694e+06	999231	1.29873e+07	187074	4.98039e+06	2.04546e+06	727280	851364	1.27033e+06	7.03907e+06	3.73396e+07	1.56472e+06	2.44804e+06	4.59261e+06	2.98501e+06	2.21422e+06	5.05369e+06	5.4873e+06	7.938e+06	3.73764e+06	1.75291e+07
CS25068	268 B1 d21	untreated d21	268	OvC1		25240	125221	3.21927e+07	404549	708227	7.11076e+06	2.13596e+06	4.26611e+07	2.97535e+07	4.02973e+06	2.72307e+06	613810	416319	2.38272e+06	7.24278e+07	1.46157e+07	6.61839e+06	2.20456e+06	1.25143e+06	1.45629e+07	325571	4.67513e+06	2.19443e+06	596499	897385	1.78332e+06	8.72677e+06	3.93342e+07	1.62823e+06	2.71209e+06	4.73143e+06	3.17913e+06	2.63197e+06	5.93956e+06	6.33734e+06	7.22445e+06	4.14914e+06	1.74968e+07
CS25069	268 B2 d21	untreated d21	268	OvC1		28952.2	52186.4	3.09999e+07	405150	743332	7.13139e+06	2.01137e+06	4.69483e+07	3.07008e+07	3.81219e+06	3.73187e+06	904858	429878	2.58057e+06	6.51768e+07	1.43228e+07	5.553e+06	2.25917e+06	1.36434e+06	1.56131e+07	242557	5.71183e+06	2.14729e+06	984282	914720	1.78696e+06	8.68811e+06	4.00165e+07	1.54729e+06	2.62023e+06	4.24509e+06	2.71104e+06	2.10527e+06	4.5328e+06	4.5556e+06	8.00863e+06	4.475e+06	1.92936e+07
CS25070	268 C1 d14	carboplatin d14	268	OvC1		63491.2	78413.8	2.98986e+07	368622	365366	5.2884e+06	1.82842e+06	4.33936e+07	2.72066e+07	3.86341e+06	3.49653e+06	1.1561e+06	226811	2.16291e+06	7.31905e+07	1.40845e+07	5.23607e+06	2.04983e+06	818853	1.40045e+07	124258	5.74734e+06	2.08464e+06	1.23038e+06	839726	1.58165e+06	9.59728e+06	3.6909e+07	2.04295e+06	2.67964e+06	4.42717e+06	2.74451e+06	2.51269e+06	3.85062e+06	4.27154e+06	1.88255e+07	4.21855e+06	1.72238e+07
CS25071	268 C2 d14	carboplatin d14	268	OvC1		26682.7	33518.6	3.03743e+07	326887	302221	6.77506e+06	1.98858e+06	4.58227e+07	2.75846e+07	4.00255e+06	4.11448e+06	429947	249701	2.49741e+06	4.7203e+07	1.39259e+07	5.04007e+06	2.24488e+06	1.0949e+06	1.46343e+07	145200	5.19637e+06	2.30754e+06	932460	855803	1.48659e+06	9.66e+06	3.80357e+07	1.43586e+06	2.46276e+06	4.42249e+06	2.61209e+06	2.25994e+06	4.01869e+06	4.33145e+06	2.03538e+07	4.19536e+06	1.82571e+07
CS25072	268 C1 d21	carboplatin d21	268	OvC1		26465.1	71840.6	3.27773e+07	411613	386161	7.34922e+06	2.26569e+06	4.93776e+07	3.0608e+07	4.37984e+06	3.91203e+06	395495	372165	2.60229e+06	4.99092e+07	1.43856e+07	5.36864e+06	2.30347e+06	1.21822e+06	1.53765e+07	192204	5.47726e+06	2.20014e+06	592339	876092	2.08068e+06	1.13494e+07	4.09396e+07	1.51083e+06	2.54484e+06	4.78999e+06	2.88513e+06	2.25823e+06	4.87872e+06	5.12238e+06	2.07336e+07	4.56441e+06	1.85196e+07
CS25073	268 C2 d21	carboplatin d21	268	OvC1		27057.6	66651.4	3.09025e+07	413458	305042	8.22079e+06	2.07377e+06	4.76937e+07	3.10558e+07	3.20402e+06	4.03983e+06	123516	394413	2.47011e+06	2.08592e+07	1.39366e+07	4.81676e+06	2.20289e+06	1.25543e+06	1.65596e+07	62092.5	4.93405e+06	2.31914e+06	478315	888208	1.83215e+06	1.0244e+07	3.70281e+07	1.01552e+06	2.15507e+06	4.18749e+06	2.96056e+06	2.18204e+06	5.38205e+06	5.27625e+06	2.16638e+07	4.15799e+06	1.87677e+07
CS25074	268 D1 d14	paclitaxel d14	268	OvC1		1.23168e+06	40094.5	3.52837e+07	514542	754083	7.63213e+06	1.87866e+06	4.89194e+07	3.3126e+07	3.89559e+06	4.49128e+06	1.38509e+06	282814	2.54234e+06	5.56542e+07	1.57952e+07	7.71579e+06	2.5071e+06	1.24373e+06	1.84627e+07	152227	6.39659e+06	2.1373e+06	1.23692e+06	1.02625e+06	1.96146e+06	8.07378e+06	4.29332e+07	2.03079e+06	2.93498e+06	5.58269e+06	2.48061e+08	3.6674e+08	9.61146e+07	1.21909e+08	1.65901e+07	4.97813e+06	1.83053e+07
CS25075	268 D2 d14	paclitaxel d14	268	OvC1		1.19882e+06	39754.6	3.09792e+07	416058	663025	5.96052e+06	1.87576e+06	4.38276e+07	2.81949e+07	2.85467e+06	3.89445e+06	1.02692e+06	269764	2.25499e+06	5.80423e+07	1.4184e+07	6.07638e+06	2.0865e+06	1.24258e+06	1.65324e+07	173356	5.89064e+06	2.16573e+06	1.31258e+06	869509	1.95798e+06	6.00375e+06	3.87145e+07	1.55459e+06	2.41382e+06	4.95083e+06	2.46682e+08	3.55273e+08	9.11052e+07	1.1605e+08	1.3356e+07	4.02445e+06	1.60656e+07
CS25076	268 D1 d21	paclitaxel d21	268	OvC1		772642	60124.9	3.07104e+07	448865	667525	4.93875e+06	1.92937e+06	4.62143e+07	2.79256e+07	3.68484e+06	4.17447e+06	993902	317491	2.35996e+06	3.85813e+07	1.3902e+07	5.2102e+06	2.17045e+06	1.37282e+06	1.52214e+07	102955	4.97552e+06	2.2055e+06	822206	841829	1.8182e+06	7.38153e+06	3.86321e+07	1.23027e+06	2.3124e+06	4.29569e+06	8.95225e+07	1.32163e+08	3.79501e+07	4.71114e+07	1.04016e+07	3.97307e+06	1.71892e+07
CS25077	268 D2 d21	paclitaxel d21	268	OvC1		892258	45467.4	2.99834e+07	484192	637102	5.53601e+06	1.99144e+06	4.50518e+07	2.88191e+07	3.5846e+06	4.48565e+06	840970	297900	2.48317e+06	4.62237e+07	1.33016e+07	4.99495e+06	2.14737e+06	1.54547e+06	1.55217e+07	133331	5.06755e+06	2.24606e+06	952420	850791	1.63242e+06	6.77229e+06	3.65563e+07	1.29293e+06	2.29738e+06	4.50422e+06	1.23815e+08	1.81308e+08	5.02978e+07	6.38446e+07	1.0466e+07	3.98958e+06	1.71406e+07
CS25078	268 E1 d14	carboplatin + paclitaxel d14	268	OvC1		1.20634e+06	53569.5	3.38301e+07	510227	414038	5.6504e+06	2.06306e+06	4.80263e+07	3.23712e+07	3.28457e+06	4.4693e+06	814846	236435	2.92249e+06	4.39484e+07	1.54566e+07	6.61104e+06	2.38049e+06	1.20997e+06	1.87827e+07	183678	5.17659e+06	2.12889e+06	1.25474e+06	927282	2.01741e+06	9.78911e+06	4.11606e+07	1.56101e+06	2.52397e+06	5.53122e+06	2.46929e+08	3.63077e+08	9.81065e+07	1.19885e+08	2.61061e+07	4.46862e+06	1.71649e+07
CS25079	268 E2 d14	carboplatin + paclitaxel d14	268	OvC1		493826	60010.4	3.07748e+07	557188	386288	7.50929e+06	1.66095e+06	4.724e+07	3.00474e+07	2.9512e+06	4.55215e+06	287627	257395	2.62938e+06	2.16361e+07	1.36992e+07	5.72195e+06	2.27679e+06	1.58974e+06	1.85565e+07	108269	6.1554e+06	2.29743e+06	831115	913949	2.2965e+06	7.14799e+06	3.89262e+07	1.05027e+06	2.42554e+06	5.07031e+06	2.13966e+08	3.18553e+08	8.38439e+07	1.12729e+08	2.85259e+07	4.56274e+06	1.83699e+07
CS25080	268 E1 d21	carboplatin + paclitaxel d21	268	OvC1		895447	27247.7	2.95122e+07	411150	439813	4.49413e+06	1.88908e+06	4.25131e+07	2.60047e+07	2.79216e+06	4.19056e+06	520613	300544	2.23874e+06	3.08189e+07	1.36829e+07	4.71943e+06	2.02962e+06	995806	1.49823e+07	120780	4.76461e+06	2.20803e+06	675923	809124	1.85091e+06	8.11995e+06	3.58514e+07	1.15073e+06	2.32954e+06	4.68976e+06	1.4166e+08	2.06983e+08	5.74637e+07	7.67265e+07	1.95748e+07	4.0853e+06	1.80281e+07
CS25081	268 E2 d21	carboplatin + paclitaxel d21	268	OvC1		650078	43438.2	3.1022e+07	468130	403103	6.90399e+06	1.83757e+06	4.76765e+07	3.00841e+07	3.24403e+06	4.59628e+06	170318	337826	2.50453e+06	1.82542e+07	1.37839e+07	4.5115e+06	2.16124e+06	1.25997e+06	1.71018e+07	101195	6.00803e+06	2.24932e+06	617244	879718	2.16699e+06	9.22158e+06	3.82774e+07	1.10025e+06	2.38529e+06	5.15594e+06	1.58181e+08	2.40839e+08	6.2797e+07	7.9268e+07	2.1246e+07	4.50933e+06	1.89681e+07
CS25082	279 B1 d14	untreated d14	279	OvC9		36484.1	967722	3.28015e+07	750871	319001	3.02104e+06	1.7818e+06	6.95262e+07	1.0036e+08	4.52628e+06	1.65531e+06	444231	278570	1.34578e+06	3.26662e+07	1.49981e+07	3.11286e+06	2.24618e+06	1.2064e+06	1.20749e+07	3.62632e+06	5.61185e+06	2.31972e+06	1.32819e+06	1.12721e+06	2.9897e+06	1.81808e+07	5.04156e+07	3.34086e+06	5.01078e+06	5.84948e+06	2.94306e+06	2.31863e+06	6.47831e+06	6.64832e+06	6.36337e+07	7.41621e+06	1.47057e+07
CS25083	279 B2 d14	untreated d14	279	OvC9		26351.6	1.24799e+06	2.84855e+07	292900	189027	2.44184e+06	1.4039e+06	3.40727e+07	2.28215e+08	2.86733e+06	688911	139828	210807	785030	2.29092e+07	1.27705e+07	2.06476e+06	1.943e+06	822825	8.53837e+06	3.2074e+06	5.22064e+06	2.21352e+06	1.57117e+06	965338	1.40988e+06	1.34836e+08	4.09193e+07	3.627e+06	5.14413e+06	5.27174e+06	4.0018e+06	3.30756e+06	8.1334e+06	7.97567e+06	9.84352e+07	1.76342e+07	1.22284e+07
CS25084	279 B1 d21	untreated d21	279	OvC9		37360.4	852628	3.46871e+07	1.16907e+06	494925	4.52859e+06	1.93751e+06	8.94364e+07	7.54318e+07	4.44281e+06	3.27831e+06	50151.3	332003	1.92641e+06	7.73955e+06	1.53743e+07	3.10352e+06	2.50598e+06	1.46491e+06	1.73363e+07	1.4183e+06	6.23181e+06	2.27751e+06	2.36923e+06	1.23702e+06	3.81101e+06	1.709e+07	4.54458e+07	1.76266e+06	3.90721e+06	5.84766e+06	3.36158e+06	2.70778e+06	6.80941e+06	6.58406e+06	3.8216e+07	5.15709e+06	1.76113e+07
CS25085	279 B2 d21	untreated d21	279	OvC9		26250	140696	2.91217e+07	1.38995e+06	1.31798e+06	5.20111e+06	1.67636e+06	9.4537e+07	7.76819e+07	3.82781e+06	4.89498e+06	49701.3	31208.2	2.54911e+06	1.80315e+06	1.30844e+07	3.04673e+06	2.07838e+06	1.79714e+06	1.91902e+07	304813	5.70881e+06	2.44536e+06	104225	1.02556e+06	4.88247e+06	3.75326e+07	4.01378e+07	1.34445e+06	3.21431e+06	4.79689e+06	5.25281e+06	4.18853e+06	9.83329e+06	1.06677e+07	7.5055e+06	5.48094e+06	1.83482e+07
CS25086	279 C1 d14	carboplatin d14	279	OvC9		46299.6	1.45136e+06	3.09796e+07	625132	206541	4.0332e+06	2.11288e+06	6.70017e+07	9.70581e+07	4.08148e+06	1.59036e+06	104194	343152	1.15468e+06	1.93941e+07	1.38919e+07	2.44275e+06	2.24835e+06	730452	1.02436e+07	4.70417e+06	4.54516e+06	2.03343e+06	2.05393e+06	1.14405e+06	2.23503e+06	1.69815e+07	4.56014e+07	7.04473e+06	5.09309e+06	6.20687e+06	2.44222e+06	1.97725e+06	4.65064e+06	3.15782e+06	1.10922e+08	9.23512e+06	1.55925e+07
CS25087	279 C2 d14	carboplatin d14	279	OvC9		26692.1	1.17269e+06	3.16531e+07	633136	230640	3.304e+06	1.77155e+06	6.40498e+07	9.78654e+07	3.89056e+06	1.49327e+06	69464.9	288408	1.28246e+06	2.00985e+07	1.41673e+07	2.74354e+06	2.10275e+06	834870	1.0082e+07	3.64938e+06	5.66914e+06	2.0964e+06	1.61208e+06	1.01767e+06	2.59106e+06	2.19519e+07	4.38648e+07	6.3909e+06	4.07597e+06	6.0016e+06	2.4315e+06	1.87615e+06	5.32592e+06	4.90745e+06	9.70391e+07	8.6689e+06	1.75842e+07
CS25088	279 C1 d21	carboplatin d21	279	OvC9		79280.2	439895	3.41739e+07	1.30725e+06	288384	6.15793e+06	1.93228e+06	9.90281e+07	7.94019e+07	4.43617e+06	4.17175e+06	26210.7	354429	1.93502e+06	2.39212e+06	1.56775e+07	3.45969e+06	2.49766e+06	1.81925e+06	1.77392e+07	1.00537e+06	5.90423e+06	2.2063e+06	1.2191e+06	1.11912e+06	4.4044e+06	2.93918e+07	4.45448e+07	2.81527e+06	5.05289e+06	6.23735e+06	1.50659e+06	2.10964e+06	4.43847e+06	4.54341e+06	9.35135e+07	6.19402e+06	1.97062e+07
CS25089	279 C2 d21	carboplatin d21	279	OvC9		27650	291963	3.19399e+07	1.26926e+06	328822	6.72743e+06	1.78508e+06	9.47957e+07	7.29575e+07	3.73554e+06	4.03252e+06	15904.3	335753	2.25777e+06	2.20267e+06	1.46284e+07	3.2839e+06	2.20678e+06	1.72636e+06	1.66006e+07	517421	5.25648e+06	2.29306e+06	990937	945076	4.8204e+06	3.2993e+07	3.98056e+07	1.73235e+06	3.75525e+06	5.21991e+06	2.67664e+06	2.18698e+06	4.48136e+06	4.45473e+06	8.01717e+07	5.7852e+06	1.75976e+07
CS25090	279 D1 d14	paclitaxel d14	279	OvC9		4.6188e+06	1.78995e+06	3.39297e+07	664808	219633	3.76799e+06	1.95143e+06	6.39925e+07	1.64977e+08	3.11429e+06	1.11653e+06	328424	462436	1.19415e+06	3.93298e+07	1.56371e+07	3.04076e+06	2.51852e+06	768663	1.13896e+07	8.79092e+06	4.94818e+06	1.95981e+06	1.92235e+06	1.26962e+06	1.93374e+06	2.48293e+07	5.34627e+07	7.27819e+06	5.11665e+06	6.5999e+06	2.72206e+08	4.34695e+08	9.76793e+07	1.30167e+08	1.55267e+08	1.10341e+07	1.45218e+07
CS25091	279 D2 d14	paclitaxel d14	279	OvC9		4.30796e+06	1.37316e+06	3.08842e+07	669780	268031	4.05039e+06	1.67378e+06	6.57321e+07	1.07257e+08	3.87629e+06	1.31596e+06	1.40144e+06	263078	1.34989e+06	4.89819e+07	1.4176e+07	2.8579e+06	2.24903e+06	1.1994e+06	1.23159e+07	6.24581e+06	4.1681e+06	2.02107e+06	1.91141e+06	1.02285e+06	2.70704e+06	1.83502e+07	4.49477e+07	4.51598e+06	6.19075e+06	6.14334e+06	2.41363e+08	3.58514e+08	8.82743e+07	1.16037e+08	8.98267e+07	7.40777e+06	1.72468e+07
CS25092	279 D1 d21	paclitaxel d21	279	OvC9		1.71871e+06	914960	3.68028e+07	1.88946e+06	438229	5.95704e+06	1.98217e+06	1.07298e+08	9.19432e+07	4.13125e+06	3.56711e+06	45916.9	404307	2.41276e+06	4.99393e+06	1.70789e+07	3.65093e+06	2.62539e+06	1.67568e+06	1.95868e+07	3.00493e+06	4.74732e+06	2.1157e+06	2.17843e+06	1.17332e+06	5.80831e+06	2.57783e+07	4.69023e+07	2.74511e+06	4.28736e+06	6.73169e+06	3.11448e+08	3.95044e+08	2.23262e+08	1.08103e+08	6.56472e+07	5.19342e+06	1.71347e+07
CS25093	279 D2 d21	paclitaxel d21	279	OvC9		3.11829e+06	1.05608e+06	3.3253e+07	1.16563e+06	443177	5.62261e+06	1.85358e+06	8.52266e+07	9.28386e+07	3.51175e+06	2.30527e+06	95841.6	460211	1.75301e+06	1.07083e+07	1.50321e+07	3.28203e+06	2.26645e+06	1.20859e+06	1.42571e+07	5.30007e+06	5.17001e+06	2.1268e+06	1.59952e+06	1.11716e+06	4.22353e+06	1.94313e+07	4.53362e+07	2.66664e+06	4.55212e+06	6.41397e+06	2.75463e+08	3.57501e+08	2.04352e+08	2.29541e+08	6.66113e+07	5.34299e+06	1.70789e+07
CS25094	279 E1 d14	carboplatin + paclitaxel d14	279	OvC9		2.63445e+06	1.32242e+06	3.25244e+07	896718	302653	3.80857e+06	1.89611e+06	6.89455e+07	9.32102e+07	2.73456e+06	1.68284e+06	603019	242787	1.60733e+06	3.69255e+07	1.4619e+07	3.06269e+06	2.18703e+06	873051	1.07717e+07	2.79507e+06	5.05742e+06	2.06637e+06	1.89056e+06	1.08996e+06	3.05359e+06	2.48e+07	4.30104e+07	5.93562e+06	4.45347e+06	5.79191e+06	2.41683e+08	3.64194e+08	8.98575e+07	1.15748e+08	1.00252e+08	7.51103e+06	1.62638e+07
CS25095	279 E2 d14	carboplatin + paclitaxel d14	279	OvC9		2.27643e+06	1.21071e+06	3.16716e+07	912461	295229	3.62468e+06	1.5995e+06	7.4259e+07	8.73447e+07	3.45107e+06	1.8796e+06	195983	253064	1.56436e+06	1.52807e+07	1.4376e+07	3.06222e+06	2.23636e+06	828787	1.16334e+07	2.36796e+06	6.19631e+06	2.17485e+06	2.16591e+06	1.03619e+06	3.24957e+06	2.89335e+07	4.32405e+07	4.36996e+06	4.79371e+06	5.57184e+06	2.39023e+08	3.5452e+08	8.67976e+07	1.1847e+08	9.58634e+07	7.31631e+06	1.69342e+07
CS25096	279 E1 d21	carboplatin + paclitaxel d21	279	OvC9		274975	105650	3.54042e+07	2.00543e+06	711069	1.58843e+07	1.03273e+06	1.06572e+08	8.51935e+07	4.02491e+06	5.71245e+06	116426	401049	2.79217e+06	1.88537e+06	1.63319e+07	4.25455e+06	2.54466e+06	2.42559e+06	2.38614e+07	289218	5.34081e+06	2.13248e+06	217583	1.04809e+06	7.24727e+06	1.4226e+08	4.49043e+07	1.31335e+06	3.11885e+06	5.63507e+06	2.99843e+08	3.75723e+08	2.1874e+08	2.48372e+08	4.47187e+07	5.31201e+06	1.98194e+07
CS25097	279 E2 d21	carboplatin + paclitaxel d21	279	OvC9		292007	102874	2.83884e+07	1.55279e+06	588162	1.12876e+07	907991	8.52886e+07	6.95662e+07	3.65927e+06	4.5985e+06	49990.1	262884	2.25904e+06	774532	1.28268e+07	3.21073e+06	1.99875e+06	2.23045e+06	1.75819e+07	188197	4.82435e+06	2.33517e+06	232905	856681	5.34394e+06	9.98634e+07	3.57716e+07	1.03254e+06	2.89965e+06	4.57424e+06	2.26458e+08	2.91978e+08	1.62878e+08	1.77555e+08	3.97622e+07	4.50309e+06	1.85382e+07
CS25098	281 B1 d14	untreated d14	281	OvC4		27397.1	264448	3.35918e+07	596305	1.35274e+06	1.56996e+07	1.78621e+06	5.42e+07	4.83779e+07	3.76939e+06	2.20903e+06	9.52006e+06	1.08881e+06	1.98961e+06	1.51283e+08	1.4821e+07	5.34198e+06	2.37593e+06	1.42284e+06	1.27832e+07	1.06252e+06	5.06415e+06	1.91187e+06	1.09556e+06	1.11352e+06	2.60318e+06	1.67444e+07	4.52421e+07	3.16919e+06	3.72495e+06	5.08642e+06	3.00674e+06	2.32749e+06	4.77713e+06	5.23138e+06	1.75233e+07	4.60541e+06	1.7301e+07
CS25099	281 B2 d14	untreated d14	281	OvC4		27702.3	189292	3.09644e+07	591674	1.33707e+06	1.37183e+07	1.6381e+06	5.14053e+07	4.46285e+07	3.22684e+06	2.16277e+06	5.61108e+06	1.04134e+06	2.07534e+06	1.49405e+08	1.40858e+07	5.77334e+06	2.26972e+06	1.40243e+06	1.1772e+07	788961	5.22923e+06	1.86632e+06	1.40476e+06	1.01034e+06	2.45064e+06	1.48839e+07	4.10889e+07	2.52505e+06	3.89249e+06	4.96294e+06	2.45676e+06	1.96784e+06	4.1217e+06	4.63616e+06	1.29717e+07	4.1043e+06	1.92268e+07
CS25100	281 B1 d21	untreated d21	281	OvC4		62431.2	72576.9	3.12325e+07	835999	461999	1.6371e+07	1.69144e+06	8.45923e+07	9.32144e+07	5.78733e+06	3.0217e+06	4.66113e+06	1.20127e+06	2.0121e+06	8.80071e+07	1.45042e+07	4.731e+06	2.16683e+06	1.32206e+06	1.20611e+07	888172	4.80336e+06	2.16538e+06	1.10053e+06	973168	3.42074e+06	2.35691e+07	3.97223e+07	1.68292e+06	3.4095e+06	4.30717e+06	2.45216e+06	2.04923e+06	4.54968e+06	5.27535e+06	3.56983e+07	1.47066e+07	1.73346e+07
CS25101	281 B2 d21	untreated d21	281	OvC4		39064	142298	3.11821e+07	846813	533729	1.75544e+07	1.78557e+06	8.89073e+07	9.52148e+07	2.97372e+06	2.82413e+06	2.96264e+06	1.79249e+06	2.08436e+06	1.3009e+08	1.40444e+07	4.78924e+06	2.14885e+06	1.41611e+06	1.25753e+07	1.10003e+06	5.56298e+06	2.07429e+06	837376	943480	3.35801e+06	2.64574e+07	4.02202e+07	1.72856e+06	3.28257e+06	4.30767e+06	2.64788e+06	2.00493e+06	4.33424e+06	3.42224e+06	3.32097e+07	1.51485e+07	1.65289e+07
CS25102	281 C1 d14	carboplatin d14	281	OvC4		39408.3	681685	3.37703e+07	818360	264771	1.61426e+07	1.80269e+06	7.12691e+07	8.13649e+07	3.93112e+06	2.68099e+06	1.43169e+07	1.47649e+06	2.14186e+06	1.85615e+08	1.58043e+07	5.42541e+06	2.42503e+06	1.25823e+06	1.1678e+07	542632	5.36686e+06	1.83054e+06	1.81507e+06	979242	3.00332e+06	3.52642e+07	4.39683e+07	3.12895e+06	3.19817e+06	5.2589e+06	2.6672e+06	1.86887e+06	3.88275e+06	4.27647e+06	8.18572e+07	1.13883e+07	1.8414e+07
CS25103	281 C2 d14	carboplatin d14	281	OvC4		53962	35901	3.12898e+07	891601	317310	1.67495e+07	1.78234e+06	7.40511e+07	6.7349e+07	3.11187e+06	4.0024e+06	2.40863e+06	1.63246e+06	2.26021e+06	3.22244e+07	1.44941e+07	6.42059e+06	2.26675e+06	1.91349e+06	1.29594e+07	135887	5.45998e+06	2.24777e+06	1.15508e+06	1.00743e+06	3.91713e+06	4.55164e+07	4.05384e+07	1.49444e+06	3.0622e+06	4.45254e+06	2.65666e+06	2.24941e+06	3.91656e+06	4.46197e+06	6.07671e+07	1.09598e+07	1.10352e+07
CS25104	281 C1 d21	carboplatin d21	281	OvC4		29138.6	68524.9	3.11915e+07	889316	222850	1.79763e+07	1.65291e+06	8.95225e+07	9.48714e+07	4.42479e+06	4.00915e+06	491916	2.0217e+06	2.23243e+06	2.91929e+07	1.4381e+07	5.44259e+06	2.15058e+06	1.7903e+06	1.29845e+07	179183	5.58207e+06	2.17949e+06	990228	985491	3.93553e+06	2.99481e+07	3.92013e+07	1.51496e+06	3.14866e+06	4.739e+06	2.48617e+06	1.71735e+06	3.78168e+06	4.6415e+06	1.0806e+08	1.60269e+07	1.78413e+07
CS25105	281 C2 d21	carboplatin d21	281	OvC4		23891.3	72498.6	3.13662e+07	967024	298315	1.98545e+07	1.60079e+06	8.65805e+07	8.98573e+07	4.11692e+06	4.20495e+06	728561	1.86747e+06	2.21454e+06	2.17741e+07	1.41325e+07	5.27988e+06	2.1239e+06	1.67421e+06	1.30172e+07	120666	5.51849e+06	2.20088e+06	805732	950865	4.01998e+06	2.87216e+07	3.89828e+07	1.24129e+06	2.85567e+06	3.54598e+06	2.76808e+06	2.20281e+06	3.86834e+06	4.80227e+06	7.88922e+07	1.64213e+07	1.88763e+07
CS25106	281 D1 d14	paclitaxel d14	281	OvC4		1.74313e+06	93669.7	3.40584e+07	1.31505e+06	594560	2.03657e+07	1.52487e+06	7.49863e+07	7.8656e+07	3.87353e+06	3.71025e+06	9.14201e+06	1.42843e+06	2.20943e+06	8.13375e+07	1.57603e+07	7.49838e+06	2.51201e+06	2.05684e+06	1.52726e+07	442586	5.15783e+06	2.06748e+06	1.58382e+06	1.0195e+06	4.79776e+06	1.9373e+07	4.59838e+07	1.82522e+06	3.67239e+06	5.28035e+06	2.41287e+08	3.02883e+08	1.7874e+08	2.01084e+08	5.04348e+07	1.0151e+07	1.81338e+07
CS25107	281 D2 d14	paclitaxel d14	281	OvC4		2.14555e+06	58685.1	3.28418e+07	1.14777e+06	607564	1.8247e+07	1.59393e+06	7.98508e+07	7.9793e+07	3.527e+06	3.98504e+06	6.29525e+06	1.30075e+06	2.2792e+06	5.2847e+07	1.5327e+07	7.53442e+06	2.38755e+06	1.9879e+06	1.45877e+07	337657	5.21779e+06	2.08684e+06	1.78593e+06	1.01307e+06	4.58485e+06	1.61822e+07	4.26947e+07	1.64432e+06	3.54942e+06	6.37311e+06	2.59058e+08	3.39625e+08	1.86522e+08	2.16431e+08	4.82233e+07	9.76267e+06	1.80337e+07
CS25108	281 D1 d21	paclitaxel d21	281	OvC4		2.03203e+06	78906.1	3.00479e+07	1.17093e+06	455164	1.84894e+07	1.4871e+06	8.98324e+07	9.61047e+07	3.58497e+06	4.14284e+06	5.90811e+06	1.42607e+06	2.09106e+06	4.58988e+07	1.40927e+07	5.7403e+06	2.1148e+06	1.68597e+06	1.3544e+07	293719	5.29033e+06	2.2236e+06	1.15856e+06	1.06795e+06	3.9342e+06	2.28702e+07	3.94135e+07	1.60961e+06	3.15392e+06	5.16066e+06	1.96472e+08	3.02628e+08	7.77475e+07	1.00396e+08	5.18361e+07	1.56197e+07	1.82684e+07
CS25109	281 D2 d21	paclitaxel d21	281	OvC4		2.07368e+06	48526.9	2.99458e+07	1.04302e+06	412135	1.89008e+07	1.33323e+06	8.57402e+07	9.17215e+07	3.43829e+06	3.61499e+06	4.6646e+06	1.38558e+06	2.1128e+06	3.89506e+07	1.36237e+07	5.64687e+06	2.18599e+06	1.8009e+06	1.34225e+07	260856	5.32498e+06	2.22292e+06	1.21566e+06	941828	3.90303e+06	2.32655e+07	3.75187e+07	1.39527e+06	3.094e+06	4.25964e+06	1.98978e+08	2.93339e+08	7.9338e+07	9.98856e+07	4.71944e+07	1.48177e+07	1.83246e+07
CS25110	281 E1 d14	carboplatin + paclitaxel d14	281	OvC4		889321	166677	3.18066e+07	1.35225e+06	427044	1.96133e+07	1.51392e+06	7.82837e+07	7.65363e+07	3.35185e+06	3.86742e+06	1.27504e+06	1.28582e+06	2.27243e+06	3.29821e+07	1.47718e+07	8.1931e+06	2.24395e+06	1.74529e+06	1.45859e+07	259546	5.46536e+06	2.32453e+06	1.60006e+06	1.02329e+06	4.83487e+06	2.47726e+07	4.20892e+07	1.49636e+06	3.29669e+06	5.42957e+06	2.54254e+08	3.16704e+08	1.85269e+08	2.02963e+08	7.99716e+07	1.15346e+07	1.81073e+07
CS25111	281 E2 d14	carboplatin + paclitaxel d14	281	OvC4		974290	254683	3.14883e+07	1.17808e+06	384545	1.77649e+07	1.33541e+06	7.34638e+07	6.98919e+07	1.98279e+06	3.77098e+06	4.75395e+06	1.25366e+06	2.37299e+06	5.17637e+07	1.38975e+07	6.34183e+06	2.13842e+06	1.46083e+06	1.36667e+07	220739	5.421e+06	2.24507e+06	914769	921487	4.65183e+06	2.84379e+07	3.90799e+07	1.48551e+06	3.12114e+06	4.46703e+06	2.13463e+08	2.73187e+08	1.61699e+08	1.85386e+08	6.93153e+07	1.00898e+07	1.57137e+07
CS25112	281 E1 d21	carboplatin + paclitaxel d21	281	OvC4		943077	34363.1	3.10614e+07	1.27714e+06	325372	1.88162e+07	1.42441e+06	8.82865e+07	9.51161e+07	3.27915e+06	3.97417e+06	79209.1	1.65282e+06	2.56083e+06	1.82984e+07	1.38514e+07	5.61478e+06	2.20878e+06	1.74958e+06	1.30878e+07	229969	5.48297e+06	2.25879e+06	997233	1.05091e+06	4.55158e+06	3.21521e+07	3.84091e+07	1.15176e+06	2.9992e+06	4.97034e+06	2.11624e+08	3.22114e+08	8.08196e+07	1.01942e+08	8.82927e+07	1.69134e+07	1.74606e+07
CS25113	281 E2 d21	carboplatin + paclitaxel d21	281	OvC4		316935	40478.6	2.74383e+07	986322	277997	1.83256e+07	1.12627e+06	7.4232e+07	8.13589e+07	3.20987e+06	4.42954e+06	79873	1.42013e+06	1.91928e+06	7.96061e+06	1.26696e+07	4.61822e+06	1.90706e+06	1.61079e+06	1.21038e+07	70011.8	5.729e+06	2.28076e+06	385024	890436	4.07238e+06	3.87359e+07	3.31515e+07	888104	2.43746e+06	3.9914e+06	1.71436e+08	2.57695e+08	6.80052e+07	8.67547e+07	7.40525e+07	1.50203e+07	1.99698e+07
CS25114	282 B1 d14	untreated d14	282	OvC2		30995	179351	3.68753e+07	967702	689504	1.85339e+07	1.8974e+06	6.66405e+07	6.10181e+07	3.9394e+06	2.84302e+06	4.03014e+06	1.21926e+06	2.25638e+06	1.075e+08	1.70205e+07	8.21628e+06	2.71912e+06	2.05852e+06	1.57769e+07	675597	4.60198e+06	1.88413e+06	1.50532e+06	1.10045e+06	3.78957e+06	1.54344e+07	4.93859e+07	3.13932e+06	4.09311e+06	6.19459e+06	2.81506e+06	2.13229e+06	4.81095e+06	4.85642e+06	2.63081e+07	5.08598e+06	1.90205e+07
CS25115	282 B2 d14	untreated d14	282	OvC2		56241.3	75241.1	3.0212e+07	803391	1.27593e+06	1.50884e+07	1.58779e+06	6.12249e+07	4.47966e+07	1.33318e+06	4.07176e+06	1.45429e+06	1.00977e+06	2.13647e+06	3.51261e+07	1.39434e+07	6.95566e+06	2.1481e+06	2.13017e+06	1.40098e+07	175047	5.07658e+06	2.21381e+06	1.11697e+06	1.04028e+06	3.31972e+06	1.53733e+07	4.0815e+07	1.63216e+06	3.43297e+06	4.43916e+06	2.54919e+06	2.14406e+06	4.28296e+06	4.98187e+06	1.23974e+07	3.77014e+06	1.73707e+07
CS25116	282 B1 d21	untreated d21	282	OvC2		29809.7	108816	3.39467e+07	1.00301e+06	394599	1.8562e+07	1.81547e+06	9.83396e+07	1.1159e+08	4.19578e+06	3.12114e+06	1.01117e+06	1.43214e+06	2.37271e+06	6.35969e+07	1.54041e+07	6.03409e+06	2.53904e+06	1.7319e+06	1.45715e+07	507723	4.91846e+06	2.09092e+06	987331	1.0894e+06	4.13114e+06	2.3679e+07	4.53819e+07	1.69745e+06	3.43381e+06	5.20563e+06	2.64468e+06	1.5881e+06	5.25159e+06	5.02521e+06	5.23519e+07	1.69435e+07	1.81323e+07
CS25117	282 B2 d21	untreated d21	282	OvC2		25145.1	27350.6	3.18002e+07	1.16384e+06	720187	1.79644e+07	1.78049e+06	9.15101e+07	9.91653e+07	3.42504e+06	3.47036e+06	291313	1.50385e+06	2.26433e+06	2.18376e+07	1.42253e+07	6.29819e+06	2.17316e+06	1.70366e+06	1.37993e+07	184703	4.58008e+06	2.23975e+06	755572	988285	4.45707e+06	2.50151e+07	4.03668e+07	1.31014e+06	3.1655e+06	5.21138e+06	2.49507e+06	2.00687e+06	4.40423e+06	4.77542e+06	2.66779e+07	1.54354e+07	1.94588e+07
CS25118	282 C1 d14	carboplatin d14	282	OvC2		25399.7	30270.7	3.53565e+07	1.32045e+06	352892	2.39692e+07	1.7255e+06	8.40398e+07	7.86444e+07	4.54212e+06	5.68574e+06	620855	1.94579e+06	2.45667e+06	1.83717e+07	1.56609e+07	8.7734e+06	2.4494e+06	2.08871e+06	1.5098e+07	110596	5.56658e+06	2.16876e+06	1.02254e+06	1.0767e+06	4.76514e+06	2.29275e+07	4.57932e+07	1.49381e+06	3.53929e+06	6.35858e+06	2.40436e+06	2.04092e+06	3.59616e+06	4.51234e+06	1.04009e+08	1.05681e+07	2.02213e+07
CS25119	282 C2 d14	carboplatin d14	282	OvC2		25715.5	99087.6	3.22782e+07	1.07181e+06	289851	1.8889e+07	1.64718e+06	7.53199e+07	7.11709e+07	2.25488e+06	4.18505e+06	1.89724e+06	1.57066e+06	2.22808e+06	4.06078e+07	1.45155e+07	7.48223e+06	2.29774e+06	2.06603e+06	1.37764e+07	169709	5.761e+06	2.16419e+06	1.07698e+06	1.05864e+06	4.14492e+06	2.61162e+07	4.18297e+07	1.88038e+06	3.47814e+06	5.69561e+06	2.45989e+06	1.92732e+06	3.6059e+06	4.24099e+06	8.04988e+07	1.01049e+07	1.77775e+07
CS25120	282 C1 d21	carboplatin d21	282	OvC2		32854.8	42401.6	3.44047e+07	1.72603e+06	249013	2.63611e+07	1.97658e+06	1.06081e+08	1.07214e+08	4.4986e+06	5.36195e+06	228480	1.95605e+06	2.61953e+06	1.59821e+07	1.5821e+07	8.6289e+06	2.64309e+06	2.94167e+06	1.55644e+07	141963	4.83762e+06	2.18655e+06	932757	1.01197e+06	5.82387e+06	3.13368e+07	4.31512e+07	1.40374e+06	3.50335e+06	5.60178e+06	2.52238e+06	2.14311e+06	3.78526e+06	4.33603e+06	1.41325e+08	1.82453e+07	1.83068e+07
CS25121	282 C2 d21	carboplatin d21	282	OvC2		46661.1	32892.8	3.0245e+07	1.10293e+06	218098	1.79544e+07	1.47522e+06	8.55372e+07	9.69832e+07	3.46703e+06	4.3207e+06	531905	1.58588e+06	2.302e+06	3.06111e+07	1.35755e+07	5.9529e+06	2.12545e+06	2.02563e+06	1.30542e+07	163043	5.62627e+06	2.38729e+06	919581	996426	4.43536e+06	3.02354e+07	3.82851e+07	1.28873e+06	2.93569e+06	3.49099e+06	2.60829e+06	2.15852e+06	3.87947e+06	4.31002e+06	1.0131e+08	1.531e+07	1.833e+07
CS25122	282 D1 d14	paclitaxel d14	282	OvC2		744986	49248	3.23488e+07	1.04795e+06	497471	1.98978e+07	1.44703e+06	7.68349e+07	7.44371e+07	3.35889e+06	4.41347e+06	1.08914e+06	1.67913e+06	2.27137e+06	2.78543e+07	1.46351e+07	7.58426e+06	2.28361e+06	2.31465e+06	1.47418e+07	213509	6.46759e+06	2.20275e+06	873925	1.08597e+06	3.76259e+06	1.89674e+07	4.23813e+07	1.4891e+06	3.30315e+06	5.52324e+06	2.46443e+08	3.15257e+08	1.962e+08	2.08821e+08	5.87749e+07	9.56094e+06	1.80974e+07
CS25123	282 D2 d14	paclitaxel d14	282	OvC2		902196	86460.2	3.52099e+07	1.13635e+06	643369	2.12353e+07	1.66969e+06	8.13486e+07	8.07392e+07	3.57913e+06	4.07823e+06	1.16675e+06	1.55019e+06	2.54676e+06	3.90143e+07	1.60854e+07	7.04725e+06	2.42372e+06	2.07699e+06	1.53667e+07	338540	6.07947e+06	2.30612e+06	1.11427e+06	1.12993e+06	4.04033e+06	2.26164e+07	4.57299e+07	1.81006e+06	3.48285e+06	6.01235e+06	2.76179e+08	3.5026e+08	2.06184e+08	2.41903e+08	5.35758e+07	1.03716e+07	1.76379e+07
CS25124	282 D1 d21	paclitaxel d21	282	OvC2		718943	32254.3	3.16919e+07	1.28388e+06	431122	2.19943e+07	1.22611e+06	8.95823e+07	1.02289e+08	3.44202e+06	4.55042e+06	948445	1.42355e+06	2.5016e+06	2.41486e+07	1.43674e+07	6.27208e+06	2.29189e+06	1.79436e+06	1.44443e+07	208281	5.85506e+06	2.19837e+06	724607	1.03979e+06	4.42363e+06	2.34461e+07	4.09289e+07	1.16252e+06	3.14471e+06	5.4705e+06	2.14278e+08	3.11163e+08	8.23461e+07	1.05777e+08	6.55498e+07	1.52841e+07	1.75118e+07
CS25125	282 D2 d21	paclitaxel d21	282	OvC2		940255	56824.7	3.12482e+07	1.26948e+06	348980	2.13826e+07	1.37121e+06	9.33611e+07	1.05931e+08	3.26286e+06	3.66077e+06	723901	1.38206e+06	2.43088e+06	4.07684e+07	1.48319e+07	6.12608e+06	2.26182e+06	1.88596e+06	1.41807e+07	526672	4.95006e+06	2.03086e+06	1.0666e+06	1.0114e+06	4.50625e+06	2.19845e+07	4.05761e+07	1.32086e+06	2.9897e+06	5.67797e+06	2.18677e+08	3.2512e+08	8.75942e+07	1.09087e+08	7.00024e+07	1.57538e+07	1.87331e+07
CS25126	282 E1 d14	carboplatin + paclitaxel d14	282	OvC2		724067	92560.4	3.69947e+07	1.46259e+06	410184	2.17167e+07	1.44535e+06	8.3326e+07	7.77215e+07	3.8071e+06	5.34253e+06	211380	1.67578e+06	2.77605e+06	2.47077e+07	1.66666e+07	8.84205e+06	2.52613e+06	2.2767e+06	1.58065e+07	219188	5.91458e+06	2.20253e+06	1.08411e+06	1.16631e+06	5.49154e+06	2.81742e+07	4.52155e+07	1.47027e+06	3.69914e+06	5.95462e+06	2.60709e+08	3.20358e+08	1.94718e+08	2.21282e+08	9.08927e+07	1.16164e+07	1.97504e+07
CS25127	282 E2 d14	carboplatin + paclitaxel d14	282	OvC2		496090	273441	3.02311e+07	939876	271517	1.71831e+07	1.37272e+06	6.98005e+07	6.9116e+07	3.13559e+06	3.55035e+06	1.67685e+06	1.52268e+06	2.21424e+06	4.7712e+07	1.38158e+07	5.11218e+06	2.03729e+06	1.59237e+06	1.16516e+07	200459	5.2585e+06	2.1736e+06	772862	964397	3.1611e+06	2.33909e+07	4.00691e+07	1.62447e+06	3.15474e+06	4.71864e+06	2.23143e+08	2.75668e+08	1.66118e+08	1.79032e+08	8.62673e+07	8.77828e+06	1.90783e+07
CS25128	282 E1 d21	carboplatin + paclitaxel d21	282	OvC2		500498	59205.9	3.44518e+07	1.78664e+06	298713	2.48601e+07	1.43912e+06	9.89426e+07	1.07339e+08	3.02084e+06	6.28386e+06	132561	1.88863e+06	2.74504e+06	1.80906e+07	1.56585e+07	7.51749e+06	2.48739e+06	2.42309e+06	1.75852e+07	208478	5.09711e+06	2.08934e+06	761204	1.04106e+06	6.28562e+06	3.83866e+07	4.42056e+07	1.18484e+06	2.9822e+06	6.36514e+06	2.34226e+08	3.44734e+08	9.17528e+07	1.17624e+08	1.18666e+08	1.24413e+07	1.86445e+07
CS25129	282 E2 d21	carboplatin + paclitaxel d21	282	OvC2		277176	43148.5	1.54819e+07	1.25351e+06	193842	1.99754e+07	1.17446e+06	7.85727e+07	9.10692e+07	2.92316e+06	4.3624e+06	86005.6	1.48201e+06	2.45178e+06	1.17031e+07	1.27074e+07	4.92279e+06	1.82831e+06	1.55128e+06	1.3843e+07	176804	5.79348e+06	2.20124e+06	380170	900796	4.37502e+06	3.01432e+07	3.63123e+07	1.01351e+06	2.58782e+06	4.52027e+06	1.94212e+08	2.8561e+08	7.90879e+07	9.86889e+07	1.15873e+08	1.43944e+07	1.83835e+07
CS25130	283 B1 d14	untreated d14	283	OvC3		30157.1	126389	3.07378e+07	886096	515061	1.56629e+07	1.53876e+06	9.22872e+07	9.67681e+07	3.80781e+06	3.18214e+06	897609	778165	2.13558e+06	3.00729e+07	1.40956e+07	4.70787e+06	2.22988e+06	1.67519e+06	1.28769e+07	454548	5.33316e+06	2.23235e+06	1.01533e+06	886686	3.78132e+06	2.18743e+07	4.0031e+07	2.95504e+06	3.33682e+06	4.82324e+06	2.52968e+06	2.07368e+06	4.4433e+06	4.29299e+06	3.84489e+07	1.52036e+07	1.82547e+07
CS25131	283 B2 d14	untreated d14	283	OvC3		42070.8	147222	2.99091e+07	836013	491290	1.75028e+07	1.42625e+06	8.6205e+07	9.9695e+07	3.76312e+06	2.79396e+06	1.25059e+06	746576	2.07779e+06	3.90569e+07	1.32321e+07	4.7194e+06	2.10995e+06	1.19318e+06	1.20246e+07	693856	5.33406e+06	2.28623e+06	1.11736e+06	912713	3.62885e+06	1.94407e+07	4.11829e+07	2.57349e+06	3.47324e+06	4.67368e+06	2.86727e+06	2.35322e+06	3.96054e+06	4.5172e+06	3.78948e+07	1.53776e+07	1.73744e+07
CS25132	283 B1 d21	untreated d21	283	OvC3		114641	78571.6	3.40439e+07	1.14463e+06	1.13249e+06	7.64944e+06	1.96752e+06	9.62917e+07	7.73528e+07	4.10476e+06	4.56609e+06	473981	335312	2.41527e+06	1.69782e+07	1.52032e+07	5.54238e+06	2.40175e+06	2.02972e+06	1.80787e+07	384536	5.50259e+06	2.09167e+06	804001	1.0509e+06	4.56925e+06	2.19998e+07	4.29569e+07	1.507e+06	3.44195e+06	5.8595e+06	2.78813e+06	2.22543e+06	4.12982e+06	4.25575e+06	1.99117e+07	1.07009e+07	1.93982e+07
CS25133	283 B2 d21	untreated d21	283	OvC3		28629.9	57891.4	3.12389e+07	838775	495148	6.73719e+06	1.94753e+06	7.72282e+07	7.10781e+07	4.25794e+06	3.16289e+06	1.01104e+06	541282	2.26156e+06	5.15438e+07	1.4415e+07	4.96789e+06	2.31524e+06	1.6441e+06	1.48122e+07	659651	5.51329e+06	2.18982e+06	1.15974e+06	987934	3.42059e+06	1.44057e+07	4.24707e+07	2.85568e+06	2.90117e+06	5.26612e+06	2.95271e+06	2.2416e+06	4.90184e+06	5.73748e+06	3.61634e+07	9.94834e+06	1.3417e+07
CS25134	283 C1 d14	carboplatin d14	283	OvC3		55077.8	242009	3.23459e+07	1.1288e+06	308597	1.74017e+07	1.5207e+06	8.94925e+07	9.94178e+07	4.37439e+06	3.94154e+06	761165	774534	2.35876e+06	2.25071e+07	1.47804e+07	5.19801e+06	2.31748e+06	1.71617e+06	1.30399e+07	308172	5.09087e+06	2.09173e+06	1.45411e+06	965666	4.57878e+06	3.2044e+07	4.36161e+07	2.28259e+06	3.70636e+06	5.13376e+06	2.49642e+06	1.94195e+06	3.66957e+06	4.16411e+06	8.08854e+07	1.84232e+07	1.8298e+07
CS25135	283 C2 d14	carboplatin d14	283	OvC3		26020.1	196728	3.04715e+07	1.14266e+06	271281	1.87635e+07	1.62312e+06	8.74859e+07	9.66369e+07	3.57975e+06	3.43411e+06	770326	1.26037e+06	2.31516e+06	2.14522e+07	1.39573e+07	4.91988e+06	2.24355e+06	1.81426e+06	1.26826e+07	381585	5.33213e+06	2.11668e+06	1.21484e+06	937212	4.10892e+06	3.02502e+07	3.9559e+07	2.22955e+06	3.55537e+06	5.45282e+06	2.66031e+06	2.13081e+06	3.82889e+06	4.46854e+06	7.75758e+07	1.59517e+07	2.12199e+07
CS25136	283 C1 d21	carboplatin d21	283	OvC3		44261.9	70430.4	3.4235e+07	1.28545e+06	333088	8.68079e+06	1.83287e+06	9.60849e+07	7.64867e+07	2.32107e+06	5.74498e+06	56469.5	370670	2.71827e+06	8.6573e+06	1.59876e+07	5.56449e+06	2.49855e+06	2.07177e+06	1.88503e+07	126833	5.35049e+06	2.03396e+06	799208	1.13757e+06	5.41798e+06	3.97933e+07	4.40375e+07	1.43317e+06	3.30283e+06	5.77666e+06	2.5667e+06	2.07267e+06	3.6265e+06	4.32864e+06	7.84628e+07	7.75084e+06	2.06507e+07
CS25137	283 C2 d21	carboplatin d21	283	OvC3		33771.9	34404.8	3.61475e+07	1.41661e+06	335365	8.32493e+06	2.0602e+06	9.98501e+07	7.93774e+07	4.99307e+06	5.04774e+06	90645.3	637882	2.79965e+06	1.06069e+07	1.64405e+07	5.87851e+06	2.65161e+06	2.1363e+06	1.9169e+07	137649	4.9393e+06	2.36594e+06	702249	1.12539e+06	5.64184e+06	2.97878e+07	4.51719e+07	1.21432e+06	3.14008e+06	5.28546e+06	2.46197e+06	2.29089e+06	3.78227e+06	4.28184e+06	7.80604e+07	1.21362e+07	2.13374e+07
CS25138	283 D1 d14	paclitaxel d14	283	OvC3		1.70734e+06	501682	3.28659e+07	1.03201e+06	442622	1.73078e+07	1.46178e+06	9.22617e+07	1.26892e+08	3.67457e+06	2.44797e+06	1.3079e+06	916594	2.12911e+06	5.27018e+07	1.49934e+07	4.60357e+06	2.32918e+06	1.3496e+06	1.24186e+07	1.2627e+06	5.7181e+06	1.98489e+06	1.80119e+06	1.11829e+06	3.90245e+06	2.08376e+07	4.50281e+07	3.87315e+06	4.6507e+06	5.19859e+06	2.2034e+08	3.20457e+08	7.62074e+07	1.03701e+08	6.71276e+07	1.7213e+07	2.02836e+07
CS25139	283 D2 d14	paclitaxel d14	283	OvC3		1.68249e+06	527741	3.29615e+07	887959	341831	1.63167e+07	1.57271e+06	8.81146e+07	1.2755e+08	3.73519e+06	2.17296e+06	1.23764e+06	968865	2.29308e+06	4.83939e+07	1.5017e+07	4.46188e+06	2.36053e+06	748824	1.17315e+07	1.55207e+06	5.80228e+06	2.00927e+06	1.82915e+06	1.12539e+06	3.4772e+06	2.02969e+07	4.52867e+07	3.68113e+06	4.72471e+06	4.74957e+06	2.25863e+08	3.46427e+08	8.64209e+07	5.7131e+07	7.21517e+07	1.79606e+07	1.7465e+07
CS25140	283 D1 d21	paclitaxel d21	283	OvC3		1.81994e+06	316504	3.86189e+07	1.61241e+06	505311	7.65903e+06	2.34605e+06	9.8319e+07	9.9722e+07	4.47999e+06	3.45697e+06	737008	519349	2.73811e+06	4.39502e+07	1.79214e+07	5.91771e+06	2.72064e+06	1.81518e+06	2.0056e+07	1.26165e+06	5.74015e+06	2.00429e+06	1.67567e+06	1.28096e+06	4.78048e+06	1.78111e+07	5.25608e+07	2.63612e+06	4.09145e+06	5.56479e+06	2.75953e+08	4.05987e+08	1.01662e+08	1.34344e+08	6.21541e+07	1.26543e+07	1.88513e+07
CS25141	283 D2 d21	paclitaxel d21	283	OvC3		1.5834e+06	151165	3.50602e+07	1.21535e+06	562747	7.55769e+06	1.98965e+06	9.06035e+07	8.37741e+07	4.68038e+06	3.41513e+06	475132	459233	2.64681e+06	3.33482e+07	1.66062e+07	5.41236e+06	2.56925e+06	1.40054e+06	1.76863e+07	936799	5.53904e+06	2.1795e+06	1.23522e+06	1.16746e+06	4.47839e+06	1.91433e+07	4.7874e+07	1.91512e+06	3.89098e+06	5.34589e+06	2.44727e+08	3.61665e+08	9.0292e+07	1.18591e+08	5.20358e+07	1.12045e+07	1.85573e+07
CS25142	283 E1 d14	carboplatin + paclitaxel d14	283	OvC3		628853	412921	3.31113e+07	1.39469e+06	367688	1.7074e+07	1.6597e+06	8.83753e+07	1.07996e+08	3.3038e+06	4.39317e+06	513235	932027	2.37694e+06	2.06758e+07	1.53633e+07	5.13196e+06	2.36264e+06	1.22354e+06	1.35341e+07	526912	5.02892e+06	2.19283e+06	1.34741e+06	1.01595e+06	4.66226e+06	3.50677e+07	4.30588e+07	4.0645e+06	3.17509e+06	5.50826e+06	2.18122e+08	3.26311e+08	8.13113e+07	1.04726e+08	8.1045e+07	1.7084e+07	1.86537e+07
CS25143	283 E2 d14	carboplatin + paclitaxel d14	283	OvC3		857976	539985	3.1398e+07	1.36196e+06	429246	1.71847e+07	1.52966e+06	8.35951e+07	1.0674e+08	2.87209e+06	3.58652e+06	391181	575404	2.22744e+06	2.8218e+07	1.41013e+07	4.58437e+06	2.30026e+06	1.58446e+06	1.25837e+07	462234	5.19136e+06	2.26558e+06	1.24308e+06	1.03209e+06	4.89908e+06	5.3817e+07	4.12889e+07	3.13677e+06	3.88418e+06	5.09368e+06	2.11124e+08	3.18255e+08	7.84458e+07	1.03323e+08	4.88857e+07	1.76956e+07	1.65525e+07
CS25144	283 E1 d21	carboplatin + paclitaxel d21	283	OvC3		136853	31474.7	3.85645e+07	2.28527e+06	517805	1.41169e+07	1.67995e+06	1.14016e+08	9.22974e+07	3.94128e+06	6.95795e+06	66143.2	555409	3.30221e+06	3.06342e+06	1.76756e+07	7.26741e+06	2.93074e+06	2.1763e+06	2.69789e+07	156175	4.97305e+06	2.13984e+06	172422	1.23949e+06	8.35542e+06	7.93127e+07	4.97754e+07	1.26211e+06	3.5957e+06	7.65133e+06	2.92124e+08	4.46951e+08	1.12203e+08	1.40534e+08	7.76982e+07	1.34033e+07	1.84481e+07
CS25145	283 E2 d21	carboplatin + paclitaxel d21	283	OvC3		61141.5	70170.9	3.57138e+07	1.90028e+06	2.36965e+06	1.79227e+07	701739	1.0192e+08	8.73859e+07	3.70413e+06	6.25254e+06	17936	102144	2.94599e+06	1.13861e+06	1.64074e+07	6.72914e+06	2.53472e+06	2.36483e+06	2.36974e+07	95919.6	5.48413e+06	2.21184e+06	26184.3	1.14849e+06	7.06771e+06	1.60744e+08	4.49871e+07	1.15695e+06	3.2135e+06	6.10211e+06	2.57442e+08	3.72423e+08	1.01266e+08	1.1746e+08	3.4445e+06	1.30236e+07	2.01596e+07
CS25146	287 B1 d14	untreated d14	287	OvC6		30529.3	408953	3.48166e+07	675294	333259	2.14301e+07	1.64913e+06	9.18266e+07	1.11956e+08	4.49353e+06	2.26314e+06	625185	566140	1.97182e+06	1.44266e+08	1.58736e+07	2.65772e+06	2.55416e+06	2.0394e+06	1.51744e+07	3.43121e+06	5.58246e+06	1.83439e+06	1.73812e+06	1.17269e+06	2.85899e+06	1.71643e+07	4.85279e+07	3.78511e+06	5.21338e+06	6.3386e+06	2.47454e+06	2.0317e+06	3.86626e+06	4.43438e+06	7.67264e+07	1.30786e+07	1.8938e+07
CS25147	287 B2 d14	untreated d14	287	OvC6		26606	398555	3.31263e+07	643447	351505	2.06048e+07	1.46259e+06	8.91258e+07	1.12777e+08	4.06571e+06	1.8647e+06	509616	560116	2.04716e+06	1.57938e+08	1.55289e+07	2.60313e+06	2.43767e+06	1.85531e+06	1.39925e+07	2.58739e+06	5.48961e+06	1.99837e+06	1.80881e+06	1.03154e+06	2.79883e+06	1.86878e+07	4.51358e+07	3.77064e+06	4.12237e+06	5.07154e+06	2.47712e+06	2.06079e+06	3.93429e+06	4.3134e+06	8.17938e+07	1.28097e+07	1.82164e+07
CS25148	287 B1 d21	untreated d21	287	OvC6		35040.9	240895	3.45209e+07	934140	484740	3.12575e+07	1.40438e+06	9.9806e+07	1.04381e+08	4.18557e+06	2.83221e+06	1.12434e+06	904918	2.41843e+06	1.21645e+08	1.58676e+07	2.88585e+06	2.39929e+06	2.14529e+06	1.64168e+07	3.41248e+06	5.77776e+06	2.03373e+06	1.40639e+06	1.21552e+06	3.71992e+06	1.3341e+07	4.75082e+07	2.73025e+06	4.15373e+06	5.75241e+06	2.42554e+06	1.99782e+06	3.92065e+06	4.51402e+06	7.35327e+07	1.31051e+07	1.95843e+07
CS25149	287 B2 d21	untreated d21	287	OvC6		53029.5	283120	3.42953e+07	1.03863e+06	417518	2.85901e+07	1.52007e+06	9.89933e+07	1.05978e+08	4.76022e+06	3.00879e+06	671331	1.01829e+06	2.36035e+06	1.2795e+08	1.55829e+07	2.78226e+06	2.43049e+06	2.12165e+06	1.59408e+07	2.77183e+06	5.50228e+06	2.11704e+06	1.23178e+06	1.20004e+06	3.64208e+06	1.65729e+07	4.60929e+07	2.79668e+06	3.80499e+06	5.78065e+06	2.45633e+06	2.1e+06	4.12046e+06	4.281e+06	7.70881e+07	1.29929e+07	1.52656e+07
CS25150	287 C1 d14	carboplatin d14	287	OvC6		119630	590757	3.57119e+07	1.10818e+06	319083	2.00425e+07	1.90661e+06	1.02168e+08	1.01838e+08	4.79189e+06	3.31041e+06	471087	652943	2.47413e+06	9.52804e+07	1.61474e+07	2.77005e+06	2.38153e+06	2.15407e+06	1.62945e+07	1.52465e+06	4.89824e+06	1.8574e+06	1.64969e+06	1.02904e+06	4.04456e+06	2.07715e+07	4.44483e+07	3.43707e+06	5.03359e+06	6.04899e+06	2.47187e+06	2.00902e+06	3.7298e+06	4.50429e+06	1.01088e+08	1.38665e+07	1.85364e+07
CS25151	287 C2 d14	carboplatin d14	287	OvC6		26176.3	820286	3.19755e+07	641054	228533	2.0456e+07	1.46708e+06	8.10292e+07	1.10455e+08	3.97641e+06	2.07122e+06	822134	515055	1.98674e+06	1.37988e+08	1.4028e+07	2.21399e+06	2.23813e+06	1.61067e+06	1.25761e+07	1.40238e+06	5.36174e+06	2.09835e+06	1.4051e+06	1.00022e+06	2.47175e+06	2.37053e+07	4.2114e+07	3.346e+06	4.3229e+06	4.482e+06	2.41037e+06	2.29858e+06	4.34041e+06	4.66012e+06	1.03203e+08	1.38421e+07	1.76542e+07
CS25152	287 C1 d21	carboplatin d21	287	OvC6		30085.3	166812	3.83701e+07	1.52658e+06	314995	3.83162e+07	1.88989e+06	1.11131e+08	9.50865e+07	4.8229e+06	5.09012e+06	178283	1.18129e+06	2.86243e+06	3.09089e+07	1.73569e+07	3.06933e+06	2.60442e+06	3.00797e+06	1.86588e+07	445553	5.60584e+06	2.25083e+06	729984	1.13972e+06	5.86658e+06	3.10065e+07	4.73154e+07	1.90001e+06	3.8626e+06	6.82283e+06	2.47302e+06	2.19329e+06	3.84738e+06	4.47616e+06	1.269e+08	1.40577e+07	1.77698e+07
CS25153	287 C2 d21	carboplatin d21	287	OvC6		52344.5	205572	3.19067e+07	1.02291e+06	273947	2.45727e+07	1.31991e+06	8.56128e+07	8.11385e+07	3.56811e+06	3.71457e+06	57093.4	837713	2.33671e+06	2.675e+07	1.45915e+07	2.07457e+06	2.31137e+06	1.96509e+06	1.39853e+07	232176	6.64395e+06	2.27463e+06	651078	961469	4.03313e+06	2.40786e+07	3.97917e+07	1.35001e+06	3.13469e+06	5.00729e+06	2.91183e+06	2.31897e+06	4.1679e+06	5.02425e+06	8.78743e+07	1.24318e+07	1.99609e+07
CS25154	287 D1 d14	paclitaxel d14	287	OvC6		745465	434675	3.12045e+07	651403	372185	1.67314e+07	1.31187e+06	8.33799e+07	8.45167e+07	3.80213e+06	2.54431e+06	239844	614623	2.30148e+06	6.34998e+07	1.42626e+07	2.12062e+06	2.17303e+06	1.39004e+06	1.12772e+07	2.14173e+06	4.9526e+06	2.05444e+06	978657	992298	2.39573e+06	1.57665e+07	3.99444e+07	1.98473e+06	3.45434e+06	5.8033e+06	2.0269e+08	3.05537e+08	7.89409e+07	9.81945e+07	5.30597e+07	1.07331e+07	1.77463e+07
CS25155	287 D2 d14	paclitaxel d14	287	OvC6		1.10289e+06	411551	3.07381e+07	643919	348654	2.03714e+07	1.30509e+06	8.31721e+07	8.72662e+07	3.60998e+06	2.61589e+06	335238	550050	2.36423e+06	7.5181e+07	1.40221e+07	2.15581e+06	2.18693e+06	1.26087e+06	1.12373e+07	2.29599e+06	5.27367e+06	2.25774e+06	1.17966e+06	956241	2.46351e+06	1.99039e+07	3.99305e+07	8.52908e+06	8.94927e+06	4.92828e+06	2.06321e+08	3.21302e+08	8.23603e+07	1.0153e+08	5.15883e+07	1.05241e+07	2.02373e+07
CS25156	287 D1 d21	paclitaxel d21	287	OvC6		828797	81499.7	3.15398e+07	989566	518172	2.25373e+07	1.25827e+06	8.88191e+07	7.75075e+07	2.93075e+06	3.87489e+06	134944	955946	2.4015e+06	2.02225e+07	1.41415e+07	2.26227e+06	2.24417e+06	2.06047e+06	1.33082e+07	833222	4.84957e+06	2.19108e+06	579258	971633	3.15813e+06	1.92921e+07	3.79855e+07	1.2054e+06	3.19872e+06	5.6847e+06	1.92226e+08	3.06291e+08	7.53754e+07	9.48936e+07	4.52696e+07	1.01746e+07	1.69571e+07
CS25157	287 D2 d21	paclitaxel d21	287	OvC6		1.16244e+06	137775	2.91796e+07	834449	537084	2.53192e+07	1.20743e+06	8.32174e+07	7.56044e+07	3.0616e+06	3.60464e+06	105067	664340	2.16417e+06	2.55506e+07	1.33993e+07	2.1077e+06	2.11542e+06	1.43992e+06	1.21486e+07	1.036e+06	4.59688e+06	2.16686e+06	660827	927240	2.84795e+06	1.55012e+07	3.57692e+07	1.37784e+06	3.01762e+06	5.89436e+06	1.91333e+08	2.87844e+08	7.39425e+07	9.30106e+07	3.89014e+07	9.99203e+06	1.82781e+07
CS25158	287 E1 d14	carboplatin + paclitaxel d14	287	OvC6		1.84837e+06	529170	3.10362e+07	731112	337314	2.08388e+07	1.15122e+06	8.57688e+07	8.69154e+07	3.5446e+06	2.88875e+06	677275	531456	2.26011e+06	9.21289e+07	1.40303e+07	2.19386e+06	2.09642e+06	1.72137e+06	1.22785e+07	942711	5.73948e+06	2.17677e+06	1.37236e+06	1.00558e+06	2.57632e+06	2.16942e+07	4.05581e+07	2.41624e+06	3.77436e+06	4.40915e+06	1.97137e+08	2.95502e+08	7.81286e+07	9.92347e+07	7.398e+07	1.30636e+07	1.79149e+07
CS25159	287 E2 d14	carboplatin + paclitaxel d14	287	OvC6		1.41395e+06	407977	2.99137e+07	688827	270522	1.97316e+07	1.33126e+06	7.73393e+07	8.1014e+07	2.82417e+06	2.44532e+06	183571	431731	1.97783e+06	5.52866e+07	1.35795e+07	2.02033e+06	2.08519e+06	1.43828e+06	1.1501e+07	1.2561e+06	5.10418e+06	2.20823e+06	778764	882747	2.63335e+06	2.53815e+07	3.73621e+07	2.11433e+06	3.49875e+06	4.20676e+06	1.83386e+08	2.73129e+08	7.20238e+07	9.55515e+07	6.13704e+07	1.25929e+07	1.79446e+07
CS25160	287 E1 d21	carboplatin + paclitaxel d21	287	OvC6		1.47664e+06	112348	3.06608e+07	1.00225e+06	425701	2.50867e+07	1.2206e+06	8.5371e+07	7.517e+07	2.86936e+06	3.42893e+06	145448	865060	2.31178e+06	2.34608e+07	1.40047e+07	2.18145e+06	2.15245e+06	1.35744e+06	1.24953e+07	463067	5.47556e+06	2.35823e+06	841163	919728	3.33482e+06	2.21222e+07	3.9019e+07	1.51166e+06	3.18719e+06	5.24681e+06	1.84798e+08	2.72896e+08	7.17098e+07	9.06888e+07	7.06277e+07	1.23878e+07	1.8943e+07
CS25161	287 E2 d21	carboplatin + paclitaxel d21	287	OvC6		1.60068e+06	71139.6	2.88152e+07	799548	414688	2.33589e+07	1.2518e+06	7.98158e+07	6.73496e+07	2.93642e+06	4.27484e+06	67933.6	473639	2.19561e+06	1.26127e+07	1.31365e+07	1.92673e+06	1.98536e+06	1.79511e+06	1.20438e+07	800273	5.69056e+06	2.24492e+06	548735	894213	3.38437e+06	3.09593e+07	3.63538e+07	1.10732e+06	2.95497e+06	5.43314e+06	1.75573e+08	2.68018e+08	7.16629e+07	8.7615e+07	5.14169e+07	1.1279e+07	1.79528e+07
CS25162	290 B1 d14	untreated d14	290	OvC7		48383.3	463483	3.47936e+07	1.20642e+06	465422	1.31169e+07	2.11824e+06	9.29172e+07	8.71395e+07	4.41226e+06	3.42673e+06	919088	1.70945e+06	2.39603e+06	1.3439e+08	1.55172e+07	4.68444e+06	2.55449e+06	1.08982e+06	1.47664e+07	1.13476e+06	5.27307e+06	2.04267e+06	1.88574e+06	1.06614e+06	3.85893e+06	1.78112e+07	4.63192e+07	2.57811e+06	4.0094e+06	6.00052e+06	2.34078e+06	1.88056e+06	3.51598e+06	4.42296e+06	4.49159e+07	1.32142e+07	1.8887e+07
CS25163	290 B2 d14	untreated d14	290	OvC7		28121.7	915816	3.57309e+07	1.00108e+06	469056	1.1405e+07	2.17251e+06	9.41455e+07	9.85225e+07	5.06781e+06	2.72444e+06	543539	1.8126e+06	2.21975e+06	1.56246e+08	1.64795e+07	4.20379e+06	2.57694e+06	1.50262e+06	1.37598e+07	1.26712e+06	5.25974e+06	1.85287e+06	2.37564e+06	1.12587e+06	3.46685e+06	1.65858e+07	4.63772e+07	3.15828e+06	4.31494e+06	5.48119e+06	2.55962e+06	2.13932e+06	3.78158e+06	4.50365e+06	6.23081e+07	1.40753e+07	1.9517e+07
CS25164	290 B1 d21	untreated d21	290	OvC7		41107.2	198375	3.51481e+07	1.01945e+06	609636	1.46774e+07	2.06333e+06	9.36993e+07	8.18987e+07	3.9002e+06	3.56485e+06	538379	1.90257e+06	2.27214e+06	1.0415e+08	1.5655e+07	4.37243e+06	2.46166e+06	1.37362e+06	1.41287e+07	892471	4.71476e+06	1.90118e+06	2.1574e+06	1.08613e+06	4.00764e+06	1.28068e+07	4.43931e+07	1.96929e+06	3.50992e+06	5.42542e+06	2.24836e+06	1.93035e+06	3.58831e+06	4.08554e+06	4.38363e+07	1.2647e+07	1.7371e+07
CS25165	290 B2 d21	untreated d21	290	OvC7		42946.6	221088	3.11461e+07	901289	442659	1.32211e+07	1.63437e+06	8.13605e+07	8.51635e+07	4.42819e+06	2.65895e+06	669119	1.50568e+06	2.33395e+06	1.28503e+08	1.39574e+07	3.58638e+06	2.16571e+06	1.36998e+06	1.18197e+07	1.16804e+06	4.67671e+06	1.88988e+06	1.69118e+06	976322	3.19524e+06	1.38577e+07	4.05333e+07	1.83605e+06	3.37792e+06	4.99199e+06	2.49709e+06	2.14048e+06	3.65396e+06	4.48925e+06	3.93592e+07	1.12661e+07	1.7122e+07
CS25166	290 C1 d14	carboplatin d14	290	OvC7		76602.3	766684	3.60768e+07	1.29e+06	314389	1.42398e+07	2.20476e+06	9.91217e+07	9.00313e+07	5.435e+06	4.87447e+06	200353	1.65356e+06	2.31259e+06	6.73327e+07	1.66818e+07	4.74073e+06	2.46907e+06	2.05193e+06	1.57031e+07	923815	4.79834e+06	2.01016e+06	1.73894e+06	1.07851e+06	4.57696e+06	2.24951e+07	4.55347e+07	2.16156e+06	3.83261e+06	6.84734e+06	2.83315e+06	2.21193e+06	3.77587e+06	4.37359e+06	8.79478e+07	1.46968e+07	1.8456e+07
CS25167	290 C2 d14	carboplatin d14	290	OvC7		62522.2	481940	3.50672e+07	1.21915e+06	386271	1.37315e+07	1.8581e+06	9.07246e+07	8.31306e+07	3.78651e+06	4.34218e+06	354878	1.67116e+06	2.6445e+06	4.53127e+07	1.59143e+07	5.0544e+06	2.37986e+06	2.10301e+06	1.54048e+07	473661	4.80469e+06	2.10998e+06	1.4042e+06	1.05665e+06	4.2637e+06	1.71554e+07	4.18899e+07	1.75913e+06	3.44108e+06	5.3597e+06	2.29282e+06	1.83878e+06	3.62106e+06	4.23773e+06	8.91284e+07	1.27294e+07	1.48261e+07
CS25168	290 C1 d21	carboplatin d21	290	OvC7		55776.7	55930.8	3.67448e+07	1.25587e+06	444456	1.64022e+07	1.93819e+06	9.57319e+07	8.1185e+07	4.98872e+06	5.23351e+06	66877.1	2.03853e+06	2.75372e+06	1.81422e+07	1.66022e+07	4.68563e+06	2.56841e+06	2.27681e+06	1.69134e+07	337467	6.11254e+06	2.32913e+06	632778	1.12647e+06	4.84544e+06	1.76766e+07	4.68525e+07	1.58602e+06	3.50998e+06	5.64909e+06	2.42737e+06	2.04905e+06	3.7431e+06	4.60991e+06	8.97037e+07	1.31883e+07	1.93223e+07
CS25169	290 C2 d21	carboplatin d21	290	OvC7		34227.5	56224.7	3.36192e+07	1.11518e+06	357204	1.39924e+07	1.89339e+06	9.07049e+07	7.39689e+07	4.17022e+06	4.90434e+06	56902.7	2.03534e+06	2.45842e+06	1.34439e+07	1.54442e+07	4.48572e+06	2.32756e+06	2.18699e+06	1.50229e+07	166302	5.69527e+06	2.38233e+06	536037	1.064e+06	4.22963e+06	1.61764e+07	4.22366e+07	1.20012e+06	3.0833e+06	5.52282e+06	2.58669e+06	2.04474e+06	3.5782e+06	4.53492e+06	8.40512e+07	1.18086e+07	1.83711e+07
CS25170	290 D1 d14	paclitaxel d14	290	OvC7		997846	748154	3.36934e+07	905233	474206	1.3802e+07	1.79449e+06	8.31736e+07	9.1288e+07	3.64949e+06	2.5775e+06	308250	1.34931e+06	2.29205e+06	7.01372e+07	1.52179e+07	3.8152e+06	2.42715e+06	1.48861e+06	1.31221e+07	1.98745e+06	5.0887e+06	2.15263e+06	1.23516e+06	1.10458e+06	3.46352e+06	1.74392e+07	4.41596e+07	1.71905e+06	3.47642e+06	5.51431e+06	2.33356e+08	3.53704e+08	9.03034e+07	1.10661e+08	4.89098e+07	1.29327e+07	1.76216e+07
CS25171	290 D2 d14	paclitaxel d14	290	OvC7		643298	580180	3.08825e+07	883115	530269	1.25481e+07	1.52306e+06	7.40347e+07	8.32855e+07	3.21286e+06	2.69617e+06	287878	1.39712e+06	2.20918e+06	7.63347e+07	1.37846e+07	3.57482e+06	2.12991e+06	1.00242e+06	1.21811e+07	1.05574e+06	5.27217e+06	1.93174e+06	963631	999926	3.02455e+06	1.6309e+07	4.03336e+07	1.53315e+06	3.16779e+06	6.07874e+06	2.05174e+08	3.14813e+08	8.07441e+07	9.86279e+07	4.63102e+07	1.20364e+07	1.73657e+07
CS25172	290 D1 d21	paclitaxel d21	290	OvC7		1.12069e+06	205518	3.39352e+07	988101	594525	1.35919e+07	1.73984e+06	8.81652e+07	8.39357e+07	3.4659e+06	3.74175e+06	62677	1.57503e+06	2.44675e+06	3.21809e+07	1.51437e+07	3.83327e+06	2.36421e+06	1.46357e+06	1.41085e+07	1.20319e+06	5.76031e+06	2.21212e+06	1.03025e+06	1.14042e+06	3.77865e+06	1.84501e+07	4.39683e+07	1.41355e+06	3.43709e+06	5.20899e+06	1.74224e+08	2.66767e+08	6.74689e+07	8.65399e+07	4.2478e+07	1.26044e+07	1.71316e+07
CS25173	290 D2 d21	paclitaxel d21	290	OvC7		572727	133971	2.93764e+07	779327	498038	1.3327e+07	1.66918e+06	7.51863e+07	6.77775e+07	2.98073e+06	3.42907e+06	43579.4	1.50777e+06	2.24478e+06	3.02549e+07	1.38039e+07	3.39636e+06	2.13427e+06	1.04088e+06	1.2212e+07	675943	5.14803e+06	2.21354e+06	598454	921626	2.88968e+06	1.96229e+07	3.67268e+07	1.06147e+06	2.85768e+06	4.46562e+06	1.76808e+08	2.7073e+08	7.32837e+07	8.4928e+07	3.68669e+07	1.00999e+07	1.74627e+07
CS25174	290 E1 d14	carboplatin + paclitaxel d14	290	OvC7		802778	528633	3.41911e+07	1.48027e+06	347670	1.57639e+07	1.66924e+06	9.35554e+07	8.66216e+07	2.43433e+06	4.42714e+06	206289	1.53885e+06	2.66441e+06	4.17695e+07	1.58938e+07	4.49338e+06	2.43036e+06	1.90517e+06	1.45582e+07	750121	4.87181e+06	2.12746e+06	1.31041e+06	1.02487e+06	4.57688e+06	2.75688e+07	4.36895e+07	1.72907e+06	3.41918e+06	6.10576e+06	2.47852e+08	3.70758e+08	9.16391e+07	1.15888e+08	7.73937e+07	1.44779e+07	1.66902e+07
CS25175	290 E2 d14	carboplatin + paclitaxel d14	290	OvC7		247581	365442	3.03761e+07	1.29116e+06	362031	1.29731e+07	1.39756e+06	8.26346e+07	7.42119e+07	3.45009e+06	4.21205e+06	114700	1.40735e+06	2.29857e+06	3.07099e+07	1.3826e+07	3.89277e+06	2.17302e+06	1.55624e+06	1.35743e+07	412394	4.69783e+06	2.19469e+06	786609	956791	4.20456e+06	3.53451e+07	3.76352e+07	1.21779e+06	2.99935e+06	5.58094e+06	2.14079e+08	3.24328e+08	8.32724e+07	1.01984e+08	6.79235e+07	1.18454e+07	1.82072e+07
CS25176	290 E1 d21	carboplatin + paclitaxel d21	290	OvC7		289483	79933.5	3.51831e+07	1.45341e+06	404198	1.67495e+07	1.45392e+06	9.69359e+07	8.08035e+07	3.28742e+06	5.82883e+06	27068.6	1.41881e+06	2.67442e+06	4.16651e+06	1.58234e+07	4.23322e+06	2.5464e+06	1.94285e+06	1.67191e+07	324000	5.69816e+06	2.13814e+06	258310	1.07235e+06	5.1219e+06	5.48954e+07	4.31824e+07	1.00022e+06	3.22132e+06	5.60962e+06	2.43535e+08	3.63778e+08	9.48488e+07	1.19214e+08	6.69053e+07	1.42028e+07	1.78282e+07
CS25177	290 E2 d21	carboplatin + paclitaxel d21	290	OvC7		26699.8	40603.5	2.94843e+07	1.24787e+06	1.14252e+06	2.3712e+07	707950	7.94404e+07	7.172e+07	2.95875e+06	4.99173e+06	61766.3	1.12737e+06	2.34116e+06	1.19708e+06	1.37332e+07	3.62048e+06	2.14488e+06	1.7198e+06	1.41599e+07	72463.9	4.64725e+06	2.0996e+06	110985	913949	4.2509e+06	1.25107e+08	3.66532e+07	762163	2.75805e+06	5.44955e+06	2.09157e+08	3.11583e+08	8.38094e+07	1.00261e+08	1.86814e+07	1.09709e+07	1.6215e+07
CS25178	media only 1	media baseline control	media			26503	33663.4	3.37512e+07	1.21036e+06	1.86994e+06	2.49111e+07	1.07076e+06	1.08579e+08	7.37964e+07	4.85771e+06	5.57557e+06	11933.8	27073.2	2.6726e+06	31936.4	1.51409e+07	3.9861e+06	2.31478e+06	2.39933e+06	2.40735e+07	81041.7	5.01038e+06	2.23556e+06	85016	1.11785e+06	4.9996e+06	4.90908e+07	4.02687e+07	866503	2.96599e+06	5.33216e+06	2.85891e+06	2.13999e+06	4.46906e+06	5.26731e+06	306944	4.05666e+06	1.80499e+07
CS25179	media only 2	media baseline control	media			34471.2	35079.7	3.60858e+07	1.21068e+06	2.28605e+06	2.41083e+07	1.12007e+06	1.19403e+08	7.40688e+07	4.37302e+06	6.42884e+06	34010.5	12833.7	2.82442e+06	20699.4	1.66673e+07	3.89513e+06	2.59043e+06	2.38623e+06	2.25062e+07	81791.6	5.27165e+06	2.17909e+06	23945.8	1.11628e+06	5.15517e+06	5.55426e+07	4.28773e+07	883750	3.27347e+06	6.17076e+06	2.39681e+06	1.99101e+06	3.64787e+06	4.45591e+06	309982	4.54779e+06	2.19233e+07
CS25180	media + SOC 1	media + drugs baseline control	media			37824.6	56630.9	3.52696e+07	1.60511e+06	2.01358e+06	3.1241e+07	522587	1.10893e+08	8.80936e+07	3.49674e+06	6.34034e+06	11238	21580.5	2.72842e+06	48697.1	1.66599e+07	4.91589e+06	2.54263e+06	2.51337e+06	2.76323e+07	84722.9	4.7953e+06	2.20966e+06	77268.1	1.15476e+06	7.01804e+06	2.16215e+08	4.28504e+07	888469	3.19652e+06	6.76659e+06	2.86403e+08	4.32926e+08	1.02412e+08	1.36738e+08	1.37001e+06	5.35406e+06	1.82428e+07
CS25181	media + SOC 2	media + drugs baseline control	media			43787.3	35458.3	3.64897e+07	2.10018e+06	2.60985e+06	2.91086e+07	540098	1.17297e+08	9.34198e+07	4.42246e+06	6.77643e+06	25756.1	15492.3	2.93958e+06	27179.9	1.64309e+07	4.7394e+06	2.64517e+06	3.03722e+06	2.93484e+07	59125.6	5.0754e+06	2.33773e+06	25422.9	1.132e+06	7.39079e+06	2.05321e+08	4.51579e+07	976723	3.45033e+06	6.23779e+06	2.89082e+08	3.91903e+08	2.17607e+08	2.49753e+08	418237	5.25508e+06	1.94537e+07

## Sheet: Annotation level 2a
					DP	25.1555	13.024	1.92782	32.6785	16.5805	9.13826	5.31961	12.7598	3.00866	0.995562	1.38238	1.68792	12.0905	0.907472	1.33582	11.6736	0.886215	1.50204	2.17358	1.13389	11.1823	0.876366	2.45964	31.0536	8.23972	4.21248	1.07357	2.24103	11.5329	1.17082	2.26233	1.06303	8.70786	5.73924	8.71818	5.1829
					Relative precision (%)	5.83687	3.98274	4.10884	3.24108	5.33943	5.44663	8.57637	8.61726	4.56499	6.66992	14.8836	15.9912	3.07632	6.59707	11.983	7.85843	10.9628	9.22201	6.08026	13.9056	8.79147	7.51539	10.1677	7.20509	6.43725	5.94776	18.8241	12.5424	14.1785	4.59911	7.24243	15.1933	12.3742	19.0121	15.1165	5.5498
					LOD	36236.3	456619	547163	50266	26648.3	501659	4433.8	86724	4408.3	61969.2	18644.7	1.1172e+06	5166.02	20466.3	35790.8	4396.06	55409.7	5080.74	5450.49	45693.4	6442.96	61535.9	42725.3	10734.3	11519.5	22023.7	64963.9	39855.5	69827.2	15675.6	18218.2	28790.8	4673.47	4158.17	4921.38	39811.4
					RT [min]	4.357	6.001	6.784	6.036	2.811	6.159	4.91+/-0.01	6.16+/-0.02	1.35+/-0.02	1.575	1.124	1.313	1.19+/-0.01	1.38	1.11+/-0.02	1.35+/-0.03	1.22+/-0.03	1.46+/-0.01	1.54+/-0.03	1.319	6.9+/-0.03	1.296	1.566	2.055	1.45+/-0.03	1.657	1.288	1.211	4.03+/-0.02	1.595	1.22+/-0.05	1.125	3.74+/-0.02	4.57+/-0.03	4.52+/-0.01	1.22+/-0.04
					Molecular Weight	227.091	130.063	160.074	144.042	145.085	130.063	220.085	118.063	158.044	174.016	121.02	179.079	146.069	106.027	75.032	117.054	155.069	188.127	189.111	119.058	205.074	192.027	134.022	175.048	221.09	174.1	132.09	167.982	167.058	168.09	164.068	125.015	168.028	244.07	152.033	150.053
					Formula	C9 H13 N3 O4	C6 H10 O3	C7 H12 O4	C6 H8 O4	C5 H11 N3 O2	C6 H10 O3				C6 H6 O6	C3 H7 N O2 S	C6 H10 O5		C3 H6 O4						C4 H9 N O3		C6 H8 O7	C4 H6 O5	C6 H9 N O5		C7 H14 N2 O3	C5 H12 N2 O2	C3 H5 O6 P		C8 H12 N2 O2		C2 H7 N O3 S
					Annotation level	2a	2a	2a	2a	2a	2a	2a	2a	2a	2a	2a	2a	2a	2a	2a	2a	2a	2a	2a	2a	2a	2a	2a	2a	2a	2a	2a	2a	2a	2a	2a	2a	2a	2a	2a	2a
					Name	2′-Deoxycytidine	3-Methyl-2-oxovaleric acid	3-Methyladipic acid	3-Methylglutaconic acid	4-Guanidinobutyric acid	4-Methyl-2-oxovaleric acid	5-Methoxytryptophan	8-Aminooctanoic acid	Allantoin	cis-Aconitic acid	Cysteine	Glucos/galactos-amine	Glutamine	Glyceric acid	Glycine	Guanidoacetic acid	Histidine	Homoarginine	Homocitrulline	Homoserine	Indole-3-lactic acid	Isocitric acid	Malic acid	N-Acetyl-aspartic acid	N-Acetyl-glucosamine	N-Acetyl-ornithine	Ornithine	Phosphoenolpyruvic acid	Pyridoxal	Pyridoxamine	Rhamnose	Taurine	Uric acid	Uridine	Xanthine	Xylose
					Compound #	X02354	X01373	X01101	X01302	X02664	X01267	SL00107	SL00108	SL00017	X00460	X02098	X00838	SL00120	X02685	SL00043	SL00044	SL00046	SL00047	SL00048	X03140	SL00124	X01040	X00168	X03123	SL00067	X02737	X00559	X00298	SL00078	X00023	SL00081	X00268	SL00145	SL00093	SL00147	SL00148
MS-Omics ID	Customer ID	Treatment	original legend	OvC case	Unit	Area	Area	Area	Area	Area	Area	Area	Area	Area	Area	Area	Area	Area	Area	Area	Area	Area	Area	Area	Area	Area	Area	Area	Area	Area	Area	Area	Area	Area	Area	Area	Area	Area	Area	Area	Area
_QC00						423559	5.24363e+06	1.39313e+07	5.53715e+06	495452	5.78098e+06	84916	569322	614848	534725	109031	1.26394e+07	5.1789e+06	274344	303191	1.11601e+06	7.3848e+06	742921	137221	1.60722e+06	192960	337745	384933	153645	420427	1.8415e+06	274255	530246	5.32041e+06	104595	530158	163316	162821	301969	105341	1.55261e+06
_QC01						350179	5.00552e+06	1.3379e+07	5.3546e+06	493332	6.17256e+06	100333	515843	643673	625111	77795.9	1.097e+07	5.80202e+06	290218	264768	1.36267e+06	8.70623e+06	647053	132799	1.85472e+06	175692	344736	468652	145996	377445	1.66869e+06	313203	429008	3.19406e+06	119130	655007	120489	144941	172574	85147.5	1.59169e+06
_QC02						410287	5.42013e+06	1.49814e+07	5.84606e+06	544268	6.08764e+06	96383.3	647575	629275	587458	80153.9	1.60847e+07	5.50582e+06	273049	295835	1.43277e+06	6.77972e+06	837509	141424	2.41536e+06	205683	355803	411238	166160	423446	1.68815e+06	371516	554404	3.87232e+06	120281	503338	181354	170648	196939	108411	1.48934e+06
_QC03						419768	5.53191e+06	1.43392e+07	5.38435e+06	517952	5.70503e+06	96947.3	527392	638495	609914	83573.1	1.35969e+07	5.39301e+06	348457	338278	1.39803e+06	7.71059e+06	828075	143469	3.09742e+06	194318	349264	513119	160801	440333	1.80754e+06	407935	592725	3.81026e+06	128256	572754	124957	145476	194219	98356.6	1.6355e+06
_QC04						410154	5.54199e+06	1.50103e+07	5.96919e+06	561976	5.65665e+06	93189.7	594170	716157	602508	74785.7	1.58389e+07	5.50625e+06	345390	325641	1.45093e+06	7.73164e+06	791861	133060	2.36134e+06	172333	446270	443330	167058	491359	1.96601e+06	370536	493194	4.26106e+06	123702	587448	118251	143036	224925	88233	1.49948e+06
_QC05						397878	5.72622e+06	1.49424e+07	5.38843e+06	532283	6.45364e+06	91272.2	642388	668069	669985	71825.4	1.18292e+07	5.69716e+06	360307	292864	1.32686e+06	8.03992e+06	820451	151041	3.06689e+06	175283	355892	465556	168031	434972	1.82704e+06	298170	575549	4.57049e+06	133261	594807	112106	138791	189886	88888.1	1.51274e+06
_QC06						449203	5.65722e+06	1.58774e+07	5.68853e+06	560847	6.38552e+06	105622	585667	671115	553322	97004.2	1.57147e+07	5.75195e+06	346970	276470	1.47061e+06	7.31406e+06	822673	150354	2.18974e+06	179460	412439	406832	177071	464847	2.03693e+06	374865	594720	3.61878e+06	119827	572170	136551	145682	203233	95031.5	1.56962e+06
_QC07						403782	5.40398e+06	1.57832e+07	5.2115e+06	498824	6.26282e+06	78082.7	574086	648428	666455	72333.2	1.88877e+07	5.95577e+06	339951	325065	1.38559e+06	8.24818e+06	841708	132567	2.30247e+06	194627	352705	526369	184998	456808	1.91313e+06	213447	449012	3.48853e+06	125144	608623	112579	145177	218558	85176.4	1.68695e+06
_QC08						399179	5.22941e+06	1.61186e+07	5.62788e+06	583880	6.5545e+06	109765	409719	702983	610015	113921	1.52212e+07	5.56403e+06	333235	317473	1.42791e+06	7.6152e+06	960642	150115	2.26124e+06	172918	377663	435664	167495	443497	1.89849e+06	342068	575674	3.44819e+06	126719	561047	145456	153303	189214	91035.5	1.45809e+06
_QC09						386318	5.18233e+06	1.51889e+07	5.4547e+06	536368	6.05747e+06	80591.2	546881	679227	665451	85833.1	1.26708e+07	5.36055e+06	336608	319949	1.39113e+06	8.19994e+06	789272	137470	2.10278e+06	132602	345282	469135	157527	418040	1.68054e+06	347542	521918	3.25348e+06	126664	641221	123386	133276	192845	83362.5	1.48715e+06
_QC10						402152	5.85684e+06	1.61817e+07	5.45127e+06	577298	6.00263e+06	88319.7	624578	700362	612467	93990.9	1.56626e+07	5.81488e+06	338674	349010	1.62014e+06	7.52031e+06	873759	146512	2.25676e+06	171298	436592	426077	160147	428178	1.85588e+06	377102	496469	3.65793e+06	119575	507830	172341	146592	176869	87073.3	1.43948e+06
_QC11						381915	5.7397e+06	1.50261e+07	5.74988e+06	585047	6.29741e+06	93300.2	590846	721227	634885	73454	1.42577e+07	5.79541e+06	323619	340584	1.48554e+06	7.56886e+06	985405	162950	2.59085e+06	163081	362947	464291	161700	454266	1.87598e+06	383766	590713	3.65678e+06	115537	544009	151638	157584	184910	99637.4	1.40009e+06
_QC12						389512	5.45088e+06	1.46698e+07	5.70459e+06	506025	6.24174e+06	100242	481401	649321	652186	107662	1.30571e+07	5.82445e+06	328852	317717	1.39943e+06	7.95543e+06	982954	127571	2.39944e+06	154784	393558	442039	161495	432085	1.8682e+06	324047	468959	3.80667e+06	124506	595136	145889	140566	196588	86435.3	1.56249e+06
_QC13						394419	5.33519e+06	1.47381e+07	5.55977e+06	555132	6.01376e+06	101371	593688	637778	604700	88733.8	1.40984e+07	5.78362e+06	330151	305753	1.42982e+06	7.49464e+06	907723	131345	2.71207e+06	166448	342813	462932	147556	424772	1.88335e+06	241976	474977	3.89333e+06	118855	620418	123334	133758	178208	85938.1	1.60839e+06
_QC14						353103	5.13095e+06	1.46391e+07	5.26151e+06	570586	5.24905e+06	90466.2	580960	668032	547239	109111	1.28896e+07	5.49099e+06	320282	466053	1.26642e+06	1.22289e+07	792407	145401	2.07905e+06	191605	373660	412656	177670	461840	1.73165e+06	571159	563421	4.30649e+06	115178	601649	143394	224449	188127	163508	1.47649e+06
_QC15						420016	5.47224e+06	1.53227e+07	5.53151e+06	495774	5.90887e+06	93981.9	595450	654454	615880	74111.5	1.51003e+07	5.34894e+06	317686	285029	1.32928e+06	7.28338e+06	805774	143120	2.31924e+06	190052	350249	472864	156786	440952	1.7487e+06	220670	484433	3.83603e+06	126133	473197	143153	158579	187507	98914.3	1.51129e+06
_QC16						383864	5.20944e+06	1.42419e+07	5.37562e+06	497107	5.86658e+06	92752.4	569626	616568	552105	98651.4	1.26028e+07	5.43774e+06	306273	289291	1.33888e+06	7.6239e+06	755627	138075	2.03478e+06	169508	347084	430863	158390	419759	1.73358e+06	261144	394948	4.41005e+06	119868	555682	132606	130263	155170	73379.8	1.60484e+06
_QC17						420923	5.57744e+06	1.4676e+07	5.55645e+06	551916	6.56256e+06	105038	586454	605722	628148	99863.9	1.28771e+07	5.5325e+06	325161	293207	1.27939e+06	7.35105e+06	795674	131362	2.05169e+06	201692	359526	443033	163089	456612	1.79772e+06	352160	602758	4.27008e+06	120433	554388	131570	155258	215305	91468.3	1.57006e+06
_QC18						409208	5.82214e+06	1.46469e+07	5.63392e+06	521275	6.53817e+06	88267.8	470125	697341	574711	92365.4	1.38496e+07	5.49862e+06	317545	285696	1.51152e+06	7.25346e+06	784463	147349	3.13547e+06	184091	407549	438121	161382	431602	1.83739e+06	268312	678687	4.11576e+06	119658	617777	109503	143485	203743	89361	1.62575e+06
_QC19						386482	5.23349e+06	1.4822e+07	5.43534e+06	543132	5.80629e+06	90000.7	583898	646294	617705	69843.5	1.59466e+07	5.42872e+06	321194	275539	1.36332e+06	7.34001e+06	748058	136095	2.021e+06	180329	357252	441720	165647	420085	1.81712e+06	361237	528981	3.2007e+06	123980	642313	178432	143778	176090	88692.4	1.4018e+06
_QC20						445956	5.19137e+06	1.4685e+07	5.84412e+06	511510	5.88339e+06	94456.7	630108	671340	626892	67819.5	1.43695e+07	5.73152e+06	300792	291278	1.31469e+06	7.26023e+06	724336	145628	2.18287e+06	197991	362442	466112	165526	423965	1.92098e+06	386762	461785	4.27366e+06	120990	532645	129441	146354	326284	96634.6	1.64309e+06
_QC21						432541	5.29588e+06	1.52904e+07	5.70057e+06	543639	6.02999e+06	91007.1	544060	629726	603807	75049.4	1.37654e+07	5.70381e+06	312904	301249	1.38482e+06	7.76359e+06	769251	149656	2.37419e+06	204242	386507	398418	157909	407203	1.75908e+06	321082	528156	4.98048e+06	125559	550183	134284	156362	282280	108788	1.52786e+06
_QC22						377774	5.1518e+06	1.41573e+07	5.27052e+06	512140	5.73266e+06	80124.1	574236	651317	502241	86816.3	1.15437e+07	5.38723e+06	300932	309751	1.24648e+06	8.20061e+06	782214	141056	2.19373e+06	163858	335123	367411	151935	403914	1.63613e+06	319430	511125	3.3281e+06	109939	623587	141210	150729	189348	87948.9	1.40138e+06
_QC23						428958	5.56883e+06	1.52892e+07	5.8669e+06	558073	6.79786e+06	110429	592903	664230	635107	87310	1.69501e+07	5.5852e+06	305966	293171	1.34758e+06	7.54662e+06	940856	149181	2.31348e+06	184299	354927	449962	185805	491901	2.11326e+06	371908	510670	3.65266e+06	124409	568082	111804	166391	210977	92498.4	1.67654e+06
_QC24						403069	5.55625e+06	1.49687e+07	5.53118e+06	529455	5.99292e+06	98514.5	546097	667296	617909	87668.8	1.41673e+07	5.69065e+06	352954	315865	1.32659e+06	8.04817e+06	832792	143226	2.19562e+06	160889	369465	634625	169036	451112	1.99395e+06	353431	423045	3.74219e+06	119394	568549	154501	140719	185086	98400.7	1.58988e+06
_QC25						392999	5.27141e+06	1.50927e+07	5.44491e+06	580332	6.14212e+06	95908.7	548420	636972	625402	87552.9	1.39085e+07	5.73586e+06	318335	365160	1.4186e+06	7.47768e+06	891927	138895	2.44168e+06	179785	363242	439146	177634	486992	1.86205e+06	312020	538225	4.79571e+06	130982	586588	150757	153245	177846	94931.3	1.56191e+06
_QC26						370251	5.5739e+06	1.50135e+07	5.52072e+06	487585	6.20041e+06	89586.5	613655	688779	618754	95308.9	1.24158e+07	5.4926e+06	322625	272868	1.44246e+06	7.80621e+06	691707	127486	2.47647e+06	185710	379394	426403	151729	413666	1.69044e+06	344172	571527	3.97806e+06	115693	554967	140658	142445	161971	93747.8	1.65655e+06
_QC27						403481	5.55151e+06	1.43807e+07	5.42322e+06	512924	5.70864e+06	90330.2	562853	669995	681973	79743.1	1.26397e+07	5.58127e+06	334429	361621	1.41889e+06	7.97765e+06	819829	135771	2.2076e+06	167266	420730	429463	159614	437220	1.73577e+06	301903	553247	3.47445e+06	124682	558533	109937	135856	191875	82474.7	1.36802e+06
_QC28						361793	5.57765e+06	1.47744e+07	5.49428e+06	555349	5.4537e+06	99384.7	552313	715351	625816	104293	1.43359e+07	5.54643e+06	351133	291700	1.73828e+06	7.97378e+06	833971	128438	2.65664e+06	179256	385869	433619	130777	365148	1.74022e+06	369477	654467	3.20967e+06	127649	574562	189386	150970	215191	89074.2	1.45517e+06
_QC29						425254	5.56447e+06	1.52624e+07	5.58666e+06	537205	5.98343e+06	88476.8	566475	687633	637431	100231	2.28972e+07	5.53132e+06	343931	276454	1.43372e+06	7.77318e+06	802647	140943	2.50773e+06	193018	382633	453216	152451	423493	1.79344e+06	357474	615222	3.2603e+06	119376	562114	121990	157996	178585	98528.3	1.50348e+06
_QC30						406937	5.61126e+06	1.44533e+07	5.67022e+06	511998	6.3144e+06	97774.4	616740	659365	640407	98797	1.38405e+07	5.66718e+06	333258	341865	1.35758e+06	7.87074e+06	805665	146453	2.18327e+06	187093	343628	481638	184115	443054	1.8321e+06	313236	477923	3.24601e+06	119936	566675	139491	151250	210231	90708.1	1.63847e+06
_QC31						395042	5.14302e+06	1.57292e+07	5.48134e+06	543739	6.18187e+06	81359.2	518391	645693	570088	83064.3	1.34618e+07	5.41445e+06	303241	334736	1.28294e+06	7.72189e+06	803226	130689	2.249e+06	158272	356990	447305	167980	472080	1.82406e+06	321822	508382	4.57744e+06	120294	620018	145553	117976	183518	95838.2	1.4729e+06
_QC32						409833	5.31186e+06	1.53322e+07	5.50135e+06	553080	6.21613e+06	104536	575753	621660	587375	87032.3	1.21915e+07	5.67559e+06	302234	303010	1.31014e+06	8.02265e+06	816341	156303	2.1407e+06	177493	377509	441538	157954	451424	1.82878e+06	324962	513114	4.58342e+06	119355	609654	119005	140525	178977	102798	1.5849e+06
_QC33						415184	5.36998e+06	1.41747e+07	5.66826e+06	533291	6.16812e+06	95374.9	567111	654918	572323	67320.5	1.24649e+07	5.66693e+06	314442	292692	1.30686e+06	7.72602e+06	881087	147429	2.41991e+06	190615	354914	432101	175564	426773	1.96261e+06	360769	442960	4.09161e+06	122727	529429	136342	194110	279388	96228.1	1.57482e+06
CS25034	264 B1 d14	untreated d14	264	OvC8		1.7016e+06	7.24218e+06	1.62337e+07	27554.7	402278	8.04525e+06	117912	468815	873461	657688	93257.4	1.1594e+07	7.42072e+06	310085	311640	881381	7.55315e+06	607706	121187	1.80622e+06	160950	356129	564552	66024.9	312948	947089	313383	803386	3.24525e+06	130236	597604	106950	2503.16	19919.4	87214.6	1.41623e+06
CS25035	264 B2 d14	untreated d14	264	OvC8		1.28726e+06	9.73012e+06	1.48159e+07	35541.4	474158	1.13629e+07	129282	690298	801095	640915	96107.3	1.07776e+07	7.37884e+06	348900	313835	1.04905e+06	6.82588e+06	572542	135277	1.45718e+06	166442	355498	461585	71687.6	325877	818762	240557	583107	5.37422e+06	133033	569167	138961	4.18512	73546.5	101391	1.35746e+06
CS25036	264 B1 d21	untreated d21	264	OvC8		634232	7.33832e+06	1.51121e+07	27502.5	367266	8.09489e+06	81447.9	541097	682573	620476	85568.1	1.40177e+07	8.13e+06	335028	328562	791745	7.52002e+06	871598	128131	2.17869e+06	130986	391411	427824	38478.8	147199	1.62307e+06	252673	720358	2.68588e+06	124857	531581	123457	30134.3	942.716	77592.9	1.46331e+06
CS25037	264 B2 d21	untreated d21	264	OvC8		698040	6.4207e+06	1.58764e+07	46704.9	329716	6.79259e+06	90196.8	704679	610125	618969	82148.7	1.19434e+07	7.33861e+06	316055	321707	898062	6.83658e+06	770796	119783	1.87068e+06	171879	367014	491377	35011.5	289970	1.43175e+06	265408	769226	4.76317e+06	122376	548737	171074	104796	1720.5	83549	1.27077e+06
CS25038	264 C1 d14	carboplatin d14	264	OvC8		226990	8.80946e+06	1.44829e+07	1.03523e+07	406670	9.24046e+06	131528	289377	818924	617216	101241	1.33337e+07	7.09292e+06	358499	318793	874202	7.09851e+06	680931	124932	1.95042e+06	95989.1	378272	449600	40967.5	400624	848812	360392	652113	1.97957e+06	112133	530584	136593	3248.96	189746	50457.2	1.73106e+06
CS25039	264 C2 d14	carboplatin d14	264	OvC8		485699	6.29781e+06	1.47021e+07	9.96434e+06	361224	6.94339e+06	105749	412504	785233	648832	80931.6	1.39843e+07	6.65961e+06	366184	250452	746928	6.60062e+06	652668	127798	2.00057e+06	101005	362654	503241	61981.2	346453	802808	334813	612906	1.77235e+06	133138	517953	130625	3615.5	156716	78088	1.45883e+06
CS25040	264 C1 d21	carboplatin d21	264	OvC8		286801	6.13902e+06	1.65661e+07	1.17026e+07	241188	6.48394e+06	97242.2	291051	674933	619686	99964.5	1.69612e+07	7.19222e+06	325271	265329	440060	7.17373e+06	793252	130535	2.39699e+06	54876	409264	412361	21320.9	275838	1.46315e+06	304708	653828	971383	134514	530818	151410	3518.99	110271	40895.3	1.83771e+06
CS25041	264 C2 d21	carboplatin d21	264	OvC8		352950	3.13903e+06	1.43795e+07	1.03162e+07	192491	4.08244e+06	131856	228204	573859	627520	71289.9	1.65354e+07	7.23173e+06	319102	251935	319717	6.69417e+06	824822	110770	1.76078e+06	82063.6	363151	480647	18915.9	195201	1.61609e+06	305522	564287	706119	127694	487535	116696	1446.99	114118	34373.7	1.96919e+06
CS25042	264 D1 d14	paclitaxel d14	264	OvC8		1.01616e+06	7.85896e+06	1.65379e+07	27577.7	408553	9.10031e+06	124520	526128	867560	600779	73130.2	1.20932e+07	7.73743e+06	367663	319684	1.12719e+06	7.4925e+06	675236	153705	1.8872e+06	148299	334857	441432	68308.1	339223	957171	335342	564169	3.95735e+06	111900	595722	158709	3562.65	127270	80881	1.46496e+06
CS25043	264 D2 d14	paclitaxel d14	264	OvC8		276095	5.75247e+06	1.65388e+07	25502.1	415769	6.39769e+06	110442	273077	871863	592692	104203	1.21409e+07	6.78362e+06	346986	302401	1.0114e+06	6.86675e+06	665255	136216	1.60801e+06	122123	412833	465503	69543.8	443665	813254	283508	734154	3.10376e+06	128561	546513	141452	3009.82	124354	77903.7	1.2378e+06
CS25044	264 D1 d21	paclitaxel d21	264	OvC8		597552	5.18704e+06	1.5334e+07	26891.5	243844	5.32006e+06	81065.8	398394	672789	626259	70914.5	1.50271e+07	7.95256e+06	306500	263161	1.28393e+06	7.266e+06	914194	115983	2.27808e+06	97301.3	345909	460028	70138.6	388921	1.53325e+06	298702	694931	2.6852e+06	138176	479923	107449	16848.6	109322	59925.1	1.4452e+06
CS25045	264 D2 d21	paclitaxel d21	264	OvC8		359895	3.35769e+06	1.60232e+07	44364.3	281367	3.91345e+06	62534.5	443923	603794	607152	110380	1.35633e+07	8.12298e+06	351394	337496	774874	7.83177e+06	760493	129766	2.27675e+06	65724.8	409732	396078	39590.7	211775	1.48071e+06	273750	676792	1.91522e+06	118155	541824	152046	1755.33	187934	74999.3	1.36302e+06
CS25046	264 E1 d14	carboplatin + paclitaxel d14	264	OvC8		224597	1.05428e+07	1.52675e+07	1.40871e+07	504761	1.45826e+07	98257.8	656473	873092	639954	76171.2	1.19225e+07	6.64258e+06	353678	363305	1.33815e+06	8.13764e+06	944060	148154	1.94561e+06	209157	343924	496881	75874.2	506817	1.1715e+06	397927	450356	3.44782e+06	135034	562059	168183	10845.2	290688	121577	1.40732e+06
CS25047	264 E2 d14	carboplatin + paclitaxel d14	264	OvC8		188269	8.17913e+06	1.52006e+07	1.09108e+07	481591	9.87884e+06	88208.4	374753	886401	614457	73842.1	1.1311e+07	6.058e+06	354777	402091	1.29234e+06	7.21985e+06	686029	154934	1.63003e+06	156900	395716	488610	64744.9	431280	960761	289533	634886	4.11819e+06	122314	511642	114503	10068.2	217718	85528.7	1.27487e+06
CS25048	264 E1 d21	carboplatin + paclitaxel d21	264	OvC8		420555	7.12101e+06	1.56195e+07	1.19517e+07	242541	8.55844e+06	73164.5	314923	654442	574467	78917.6	1.61846e+07	7.29119e+06	334102	307516	485500	7.56638e+06	869628	119696	2.25942e+06	59950.9	377922	466591	23490.9	170057	1.66257e+06	206002	705129	1.73444e+06	128585	528966	127684	3634.09	153977	54608.7	1.55646e+06
CS25049	264 E2 d21	carboplatin + paclitaxel d21	264	OvC8		294479	5.92504e+06	1.49216e+07	1.10547e+07	210077	7.63848e+06	64747.5	176708	614424	587805	101121	2.49108e+07	6.01719e+06	361266	304776	587529	6.50107e+06	856761	120265	2.34082e+06	79646.9	389795	439645	23199.7	322825	1.48897e+06	390812	525739	2.01487e+06	129234	426148	132835	5414.16	117570	59044	1.12637e+06
CS25050	265 B1 d14	untreated d14	265	OvC5		121571	1.1844e+07	1.51588e+07	27739.4	930836	1.2003e+07	82828.8	809128	970801	618476	65978.4	9.49581e+06	8.59814e+06	330897	372236	2.0676e+06	7.8537e+06	672873	139707	2.26711e+06	428211	373184	442663	427650	401200	853856	364647	929269	6.22291e+06	117649	616908	111627	139676	105955	108601	1.21659e+06
CS25051	265 B2 d14	untreated d14	265	OvC5		157358	9.9784e+06	1.52806e+07	26063.4	1.19942e+06	9.25212e+06	103744	957741	909260	598564	91852.6	8.53833e+06	8.56831e+06	315197	322384	2.00713e+06	7.29475e+06	654193	142063	2.26482e+06	472267	394633	441774	202147	308539	884445	299011	876073	7.70547e+06	120182	620856	131206	227949	47198.3	89497.1	984407
CS25052	265 B1 d21	untreated d21	265	OvC5		160155	8.30829e+06	1.52946e+07	45996.8	531033	8.55748e+06	115679	642187	678890	603305	75766.5	9.28083e+06	9.06331e+06	331645	304882	2.09178e+06	5.74933e+06	851985	147230	2.65634e+06	416169	399267	470437	285353	125656	1.5089e+06	355115	823740	4.38746e+06	124894	545745	140356	89039.3	84894	75943	1.25792e+06
CS25053	265 B2 d21	untreated d21	265	OvC5		220882	6.09763e+06	1.66232e+07	26912.1	672395	6.33365e+06	87861.4	776995	584022	647212	82560.5	8.13699e+06	8.86915e+06	340341	312610	1.40587e+06	5.47481e+06	732397	97741.4	2.05843e+06	289205	367898	461499	53162.2	112217	1.44408e+06	281545	873648	5.70218e+06	124201	522651	133972	240224	52631.8	79001.1	976952
CS25054	265 C1 d14	carboplatin d14	265	OvC5		120000	1.52601e+07	1.53113e+07	1.18519e+07	2.51341e+06	1.726e+07	116584	644946	824983	622877	81232.7	1.11599e+07	7.26833e+06	328934	391880	3.29897e+06	8.06949e+06	637106	141782	2.14555e+06	671113	389590	661008	510485	949131	924187	318663	666272	7.08259e+06	129207	584710	124721	191399	562943	149299	1.30402e+06
CS25055	265 C2 d14	carboplatin d14	265	OvC5		121647	1.33805e+07	1.61656e+07	1.07961e+07	2.18524e+06	1.35131e+07	146078	521910	768802	569652	69364	1.07746e+07	6.90644e+06	317924	345903	2.27938e+06	7.39909e+06	549495	130287	2.14131e+06	428857	380653	609610	276369	899118	757413	292067	850271	5.3287e+06	130497	534592	111723	380568	65887.6	119168	1.33058e+06
CS25056	265 C1 d21	carboplatin d21	265	OvC5		201518	4.05714e+06	1.51111e+07	1.15689e+07	648067	5.36824e+06	94576.6	166646	670284	579844	66503.6	5.21815e+06	7.16622e+06	328093	258765	785147	7.77036e+06	795248	131422	2.30882e+06	97826.3	357507	474229	70271.8	371233	1.64838e+06	315960	609540	705568	118792	539229	167979	1789.92	201736	48685.4	1.88883e+06
CS25057	265 C2 d21	carboplatin d21	265	OvC5		94351.2	4.82547e+06	1.59238e+07	1.07939e+07	623676	6.82796e+06	124873	256480	660535	596692	81864.8	1.48384e+07	6.77338e+06	315531	310176	654265	7.32606e+06	774737	116737	2.44874e+06	86630.5	337677	449179	46364.2	347260	1.43339e+06	252232	686855	1.28004e+06	123299	523797	141320	5726.64	1077.64	47857.5	1.69895e+06
CS25058	265 D1 d14	paclitaxel d14	265	OvC5		110465	1.22313e+07	1.59048e+07	32779.8	2.63315e+06	1.29008e+07	79936.4	1.25504e+06	892151	615372	70284.4	8.84414e+06	7.89935e+06	301264	400860	2.56191e+06	8.17096e+06	685382	160459	2.35989e+06	806327	350797	448110	536602	535582	915137	356812	796903	9.77335e+06	123273	543622	149682	180737	203345	142392	977157
CS25059	265 D2 d14	paclitaxel d14	265	OvC5		160819	1.11939e+07	1.69437e+07	45981.2	3.20929e+06	1.14482e+07	64309.3	1.28363e+06	1.00446e+06	574934	89512.3	8.05335e+06	7.17738e+06	344931	407088	3.02818e+06	8.27597e+06	674102	161794	2.15241e+06	803613	343577	479025	562470	752165	968081	338657	685654	1.01548e+07	109927	648941	135067	273807	328554	199835	913379
CS25060	265 D1 d21	paclitaxel d21	265	OvC5		46057.8	6.55632e+06	1.66316e+07	39917	1.21187e+06	7.14159e+06	87587.4	361950	717842	601566	67837.8	1.11924e+07	7.89354e+06	315511	366503	2.27758e+06	7.95985e+06	821129	138200	2.92937e+06	405211	367973	438278	154732	421198	1.55262e+06	301100	758480	2.58554e+06	117026	520689	163353	34478.3	156680	65814.7	1.4444e+06
CS25061	265 D2 d21	paclitaxel d21	265	OvC5		106517	7.50303e+06	1.57458e+07	26668	1.5901e+06	7.42537e+06	55072.4	816141	644937	536822	84961.4	1.10609e+07	7.4101e+06	315665	274033	1.87553e+06	7.47319e+06	799756	122634	2.40978e+06	351490	392541	449615	180528	532273	1.74155e+06	256125	770908	3.8601e+06	116954	547653	145364	126580	199678	92523.7	1.1165e+06
CS25062	265 E1 d14	carboplatin + paclitaxel d14	265	OvC5		133942	7.79698e+06	1.66534e+07	1.12077e+07	2.20506e+06	7.45255e+06	93745.4	247252	903706	583719	90475.9	1.02789e+07	7.9918e+06	338020	318662	1.91477e+06	9.18203e+06	754008	142705	2.69449e+06	308723	373882	425514	103816	819126	898716	337402	616901	952216	121612	707418	134991	46676.4	559754	60783.7	2.14153e+06
CS25063	265 E2 d14	carboplatin + paclitaxel d14	265	OvC5		133379	3.98187e+06	1.49893e+07	1.0736e+07	1.56328e+06	4.55858e+06	98135.7	200479	848060	589928	98841.4	1.29086e+07	7.08375e+06	324478	271253	1.75441e+06	8.36053e+06	717726	141355	2.27678e+06	213405	374741	475358	60776.5	480648	855960	337730	717597	574362	126054	671378	148301	4932.68	428578	62867.2	1.91432e+06
CS25064	265 E1 d21	carboplatin + paclitaxel d21	265	OvC5		487493	804436	1.3978e+07	1.28638e+07	436734	1.312e+06	109655	132010	714791	625725	71557.8	1.84699e+07	7.44753e+06	315431	282971	462753	7.90732e+06	911712	129747	2.94109e+06	53988.8	385588	458527	13183.2	110767	1.73499e+06	277735	648218	99465.4	123886	555962	170213	1785.39	192394	41097.6	2.35393e+06
CS25065	265 E2 d21	carboplatin + paclitaxel d21	265	OvC5		363460	290563	1.52016e+07	1.06541e+07	336101	379480	89345.1	143193	627284	578600	92363.7	1.78106e+07	7.028e+06	302708	246003	414914	7.33049e+06	764763	109481	2.10557e+06	46277.3	390898	409385	6408.57	215886	1.30573e+06	291413	758535	312570	126546	473911	131119	3017.59	147701	25028.7	2.06465e+06
CS25066	268 B1 d14	untreated d14	268	OvC1		189717	4.04393e+06	1.50047e+07	25455.8	237057	4.13544e+06	6001.74	472875	603915	641644	123302	1.23941e+07	8.44141e+06	324415	423447	1.05049e+06	7.42185e+06	822519	105907	2.52802e+06	64684.6	341915	531300	8283.8	258731	1.57191e+06	341747	739293	4.84245e+06	119329	513646	111576	166232	115096	87877	1.01647e+06
CS25067	268 B2 d14	untreated d14	268	OvC1		219407	3.69977e+06	1.41543e+07	41796.1	186805	4.02234e+06	11766.7	321729	581669	666130	81878.4	1.17112e+07	8.37262e+06	330087	369757	829543	7.08187e+06	706293	115619	2.13732e+06	76271.7	364915	464356	8090.38	302473	1.43135e+06	276223	822271	3.30701e+06	131201	507955	185463	198833	139458	56452.9	1.27479e+06
CS25068	268 B1 d21	untreated d21	268	OvC1		218744	3.14887e+06	1.47161e+07	31048.7	241513	3.57318e+06	24884.7	489735	584664	649911	128852	1.07705e+07	8.84571e+06	349057	284860	834257	7.41824e+06	768842	131666	3.58619e+06	59529.5	378496	451132	18412.1	241716	1.63932e+06	278010	741510	5.20188e+06	137287	499662	116813	220790	102885	71038.4	1.19303e+06
CS25069	268 B2 d21	untreated d21	268	OvC1		246103	5.36393e+06	1.57641e+07	26027.1	265745	5.46592e+06	5372.96	497009	635510	587622	93347.7	2.99884e+07	8.50366e+06	333921	325797	837220	7.38582e+06	847160	133607	2.40316e+06	79561.4	367500	451593	13196.9	152052	1.8405e+06	278094	757208	2.95536e+06	128836	441810	132256	214663	61445.9	56128.2	1.33767e+06
CS25070	268 C1 d14	carboplatin d14	268	OvC1		86018.9	6.15239e+06	1.4997e+07	1.10311e+07	284266	6.69209e+06	37833.4	241396	614028	644953	82346.5	1.6522e+07	9.04434e+06	324550	300101	879317	7.2612e+06	848402	113919	2.86998e+06	21953.1	372069	472099	11939.1	283353	1.47987e+06	281035	844717	2.73428e+06	121028	439802	113067	144531	171591	71249.4	1.41398e+06
CS25071	268 C2 d14	carboplatin d14	268	OvC1		144437	5.15433e+06	1.52867e+07	1.12033e+07	255918	5.32128e+06	33044.1	155021	650276	614512	83253.5	1.95093e+07	8.38234e+06	304609	310508	668830	7.1011e+06	815949	116376	3.37907e+06	41739.8	369867	451861	11825.2	194663	1.52655e+06	282638	730754	2.62127e+06	128208	509156	120884	154081	123371	40591.7	1.60684e+06
CS25072	268 C1 d21	carboplatin d21	268	OvC1		133645	3.50779e+06	1.57888e+07	1.15438e+07	259409	3.70955e+06	25174	272804	633897	591739	77149.4	1.65199e+07	9.21068e+06	313942	319908	592389	7.77505e+06	872092	126602	2.85162e+06	51353.3	371889	417778	16795.5	64211.6	1.75023e+06	365389	829894	2.52158e+06	126240	530722	114353	161560	112967	43667.8	1.49732e+06
CS25073	268 C2 d21	carboplatin d21	268	OvC1		101427	2.20636e+06	1.35707e+07	9.41025e+06	180046	2.29908e+06	43803.6	189136	628362	595353	116654	1.81126e+07	8.36189e+06	315042	272037	446471	6.96001e+06	876127	129791	2.51434e+06	25996.9	354292	487028	17692.9	59786	1.6011e+06	309426	707882	1.02829e+06	112417	489781	138111	73776.4	167061	46635.6	1.64698e+06
CS25074	268 D1 d14	paclitaxel d14	268	OvC1		150301	5.43806e+06	1.7204e+07	34400.6	274273	6.64006e+06	54980.4	267507	644275	612485	78381.9	1.58637e+07	8.22869e+06	317435	360857	1.15559e+06	8.66816e+06	925044	133439	3.09686e+06	66733.4	363668	441088	19097	357417	1.77087e+06	315276	617240	2.00037e+06	120730	574352	137419	179728	149548	53157.1	1.79818e+06
CS25075	268 D2 d14	paclitaxel d14	268	OvC1		104738	5.51099e+06	1.55425e+07	27280	267821	6.67401e+06	40692.9	261444	600469	645524	67809.6	1.43201e+07	7.55426e+06	315649	320078	825023	7.68108e+06	822281	129553	2.40617e+06	69961.7	380774	483644	8337.23	359430	1.50128e+06	334420	721272	2.68518e+06	121738	519041	115873	219033	90132.7	56134.7	1.55473e+06
CS25076	268 D1 d21	paclitaxel d21	268	OvC1		291808	3.87147e+06	1.50915e+07	233581	242945	4.84189e+06	35659.1	221958	590234	614047	102263	1.70552e+07	8.22048e+06	321668	303549	900836	7.37241e+06	847767	110218	2.43922e+06	43070.4	343968	495164	11462.2	301940	1.63361e+06	307174	783776	2.24684e+06	120175	507487	137829	184657	82775	48217.1	1.78735e+06
CS25077	268 D2 d21	paclitaxel d21	268	OvC1		314185	3.62186e+06	1.49202e+07	121899	257286	4.84517e+06	32771	175885	594162	692138	74780.1	1.77431e+07	7.49152e+06	309698	335141	760902	7.01864e+06	865341	112404	2.34644e+06	37280.6	366939	521093	7011.89	295648	1.57654e+06	272651	771405	2.61588e+06	142711	513005	127048	182668	49702.5	50838.8	1.72403e+06
CS25078	268 E1 d14	carboplatin + paclitaxel d14	268	OvC1		122996	4.92578e+06	1.53234e+07	1.33512e+07	252651	6.16765e+06	12065.9	148366	633611	627190	70150.3	1.70379e+07	8.32703e+06	319676	317430	844123	8.12559e+06	953009	131778	2.4178e+06	52922	393935	434130	21431.2	351584	1.89112e+06	317690	691159	1.99174e+06	113322	525179	116292	306445	36474.3	51329.2	1.84384e+06
CS25079	268 E2 d14	carboplatin + paclitaxel d14	268	OvC1		148651	3.78605e+06	1.70327e+07	1.09894e+07	186486	5.63905e+06	24609.3	101729	603914	643314	74098.2	2.12518e+07	7.39608e+06	329644	343908	555038	8.01083e+06	788352	111979	2.81427e+06	49924.5	362516	460953	7218.06	356147	1.46067e+06	306272	558105	912688	122179	553550	126539	181051	113923	24683	1.942e+06
CS25080	268 E1 d21	carboplatin + paclitaxel d21	268	OvC1		226809	2.9776e+06	1.4344e+07	9.79627e+06	231010	4.00313e+06	19057.4	145942	553928	580827	81029.6	1.54448e+07	8.11009e+06	333479	260214	455057	7.12526e+06	645697	107422	2.42109e+06	70014.6	384612	412031	18410.5	273891	1.35227e+06	297578	683146	1.8916e+06	115429	496349	123259	189524	91698.3	39428.1	1.85173e+06
CS25081	268 E2 d21	carboplatin + paclitaxel d21	268	OvC1		259243	2.99162e+06	1.68455e+07	8.29584e+06	177288	4.1251e+06	31082.6	165441	605299	720773	74707.9	1.6954e+07	8.18987e+06	325294	225040	457137	8.19702e+06	782573	116990	2.37229e+06	20851.4	338872	497878	14060.2	333815	1.46601e+06	259069	667300	980106	121060	531195	115727	199827	104844	30110	2.07012e+06
CS25082	279 B1 d14	untreated d14	279	OvC9		153358	6.54064e+06	1.6107e+07	26050.5	255506	6.16865e+06	116765	1.63505e+06	643440	747220	114011	1.01633e+07	8.48041e+06	330037	356588	438389	8.0549e+06	757293	164184	2.06226e+06	387874	377457	546178	1.41659e+06	371548	2.18498e+06	215093	661331	2.11728e+07	127888	576646	124467	505858	50458.5	339898	617427
CS25083	279 B2 d14	untreated d14	279	OvC9		1.72298e+06	6.13751e+06	1.5311e+07	25599.7	293813	6.92673e+06	122990	2.12742e+06	520007	545125	128150	4.54039e+06	6.28645e+06	321460	307407	427974	7.48233e+06	683853	137072	1.71726e+06	354131	387829	838273	2.73603e+06	770642	1.62877e+06	247242	620688	3.91447e+07	114608	483050	165458	400380	1.67898e+06	967550	317744
CS25084	279 B1 d21	untreated d21	279	OvC9		372981	1.09528e+07	1.46778e+07	31702.3	423267	1.02787e+07	95347.5	1.0492e+06	704216	573332	204925	1.35088e+07	8.51919e+06	350833	252466	548308	8.38892e+06	983738	163316	2.26952e+06	211530	397390	440620	221303	599899	2.34191e+06	235507	753812	6.14515e+06	123423	611872	145307	174013	655473	160274	1.26646e+06
CS25085	279 B2 d21	untreated d21	279	OvC9		6.04109e+06	520913	1.43962e+07	25091.3	343009	510143	45866.7	348938	602248	618000	101511	1.77636e+07	6.65133e+06	299994	223637	459433	6.84879e+06	827016	133491	2.65664e+06	101593	359536	440038	144012	266716	2.13793e+06	421478	676969	277197	113428	440243	123696	118913	350630	95746.9	1.92376e+06
CS25086	279 C1 d14	carboplatin d14	279	OvC9		211901	9.1668e+06	1.55317e+07	1.08362e+07	596203	8.96455e+06	243631	2.72917e+06	623654	677405	73495.1	1.03445e+07	6.51573e+06	345924	400509	403034	7.91776e+06	912948	143171	1.80931e+06	283673	388719	1.38247e+06	1.59908e+06	1.08548e+06	2.05921e+06	369333	632002	3.44493e+07	134141	619903	185287	385951	996270	681443	456261
CS25087	279 C2 d14	carboplatin d14	279	OvC9		289945	6.9138e+06	1.05147e+07	1.1105e+07	369645	6.97303e+06	165373	2.23346e+06	566258	673741	81536.5	8.84655e+06	7.03657e+06	325603	336863	490618	7.46968e+06	778774	135787	1.74035e+06	294478	345621	1.10339e+06	1.44447e+06	911180	1.89488e+06	343944	766315	2.79214e+07	129130	581106	144019	359458	592210	537032	642510
CS25088	279 C1 d21	carboplatin d21	279	OvC9		939053	6.11725e+06	1.51882e+07	1.2815e+07	412632	6.45947e+06	81502	520172	671463	595488	74484.9	1.64533e+07	7.18195e+06	374903	299907	539170	7.98451e+06	814506	153770	2.15735e+06	144389	364118	419637	379139	687802	2.28265e+06	268174	690413	2.77562e+06	131835	651698	169508	87967.7	985231	118283	1.73123e+06
CS25089	279 C2 d21	carboplatin d21	279	OvC9		1.16133e+06	4.84609e+06	1.46547e+07	1.27959e+07	332746	5.39861e+06	58001.4	449987	559077	622934	78506.7	1.70427e+07	6.3543e+06	343997	291407	505370	6.90187e+06	770286	130987	2.32334e+06	134841	418551	461860	236089	486450	2.11374e+06	394080	631532	1.49658e+06	134112	467852	150210	71870.8	728486	105303	1.72681e+06
CS25090	279 D1 d14	paclitaxel d14	279	OvC9		154898	8.18835e+06	1.52656e+07	26250.1	510542	8.36637e+06	151606	4.32112e+06	677049	626141	80464.6	9.21892e+06	5.74409e+06	337673	343901	581571	9.01996e+06	955231	166545	2.06701e+06	1.22426e+06	427776	668544	1.15738e+06	625830	2.26492e+06	364600	734477	4.30543e+07	134406	665916	149928	580521	79322.6	651410	385391
CS25091	279 D2 d14	paclitaxel d14	279	OvC9		54002.3	7.6983e+06	1.58452e+07	32742.3	412764	7.63607e+06	81263.2	3.1755e+06	639450	665622	73531.7	9.12395e+06	6.14391e+06	300646	315490	829745	8.1065e+06	890883	170567	1.58192e+06	896721	432040	623842	1.07119e+06	562777	2.59357e+06	307018	645632	2.10864e+07	125023	651422	110819	538017	17006.7	378434	465318
CS25092	279 D1 d21	paclitaxel d21	279	OvC9		395981	8.20618e+06	1.47379e+07	26175.2	403471	8.65892e+06	80603.9	854987	650256	615421	80085.2	1.34316e+07	7.15988e+06	322042	320084	441302	8.51573e+06	1.04898e+06	173509	2.24338e+06	485017	362925	447717	271762	558172	2.60525e+06	278097	583971	3.23527e+06	125117	615283	143317	116654	208205	135758	1.60179e+06
CS25093	279 D2 d21	paclitaxel d21	279	OvC9		115846	6.57096e+06	1.55032e+07	39763.3	459150	7.08459e+06	83998.6	1.41167e+06	668789	604867	106142	1.13515e+07	6.20755e+06	323755	281422	489451	8.19032e+06	910020	159208	2.06821e+06	717071	415490	451741	314945	498923	2.22285e+06	332133	543302	9.81204e+06	126149	654074	149592	137682	16858.5	237024	946611
CS25094	279 E1 d14	carboplatin + paclitaxel d14	279	OvC9		100431	7.83462e+06	1.46914e+07	1.17543e+07	477032	7.41948e+06	101727	2.01743e+06	623130	593150	76324.8	1.10979e+07	5.86255e+06	338384	351161	602364	7.53918e+06	798445	158261	1.93597e+06	361538	375288	807816	1.082e+06	1.07027e+06	2.11035e+06	199499	641014	1.4909e+07	118585	583377	115960	270126	659482	422759	817479
CS25095	279 E2 d14	carboplatin + paclitaxel d14	279	OvC9		106918	8.25834e+06	1.42462e+07	1.21106e+07	360964	8.41962e+06	86321	2.28106e+06	585940	679860	92719.7	1.02736e+07	6.38501e+06	321287	266050	338031	7.30614e+06	685643	133514	2.31055e+06	367559	423470	821171	852287	1.13361e+06	1.88954e+06	277353	609650	1.64216e+07	128421	538770	135285	248527	809321	359349	847590
CS25096	279 E1 d21	carboplatin + paclitaxel d21	279	OvC9		1.50011e+06	919850	1.50254e+07	1.35324e+07	247517	1.27121e+06	63023.5	264236	622613	674059	92021.5	1.89205e+07	6.72067e+06	320106	261606	305394	7.3694e+06	1.02157e+06	156650	2.33752e+06	95744.4	343099	456895	70265.9	176238	2.23623e+06	426797	494398	147525	118513	630744	109862	4841.51	249066	46598.4	2.22731e+06
CS25097	279 E2 d21	carboplatin + paclitaxel d21	279	OvC9		1.44455e+06	933595	1.37313e+07	1.03112e+07	184029	1.19865e+06	44883.3	253347	533509	648342	90784.2	2.37983e+07	5.54754e+06	339154	222276	193692	5.96335e+06	865063	117973	2.02356e+06	51524.1	352033	477073	53911.7	112447	1.7012e+06	226166	436834	186740	122457	460857	105169	1969.15	231201	36594.8	1.74981e+06
CS25098	281 B1 d14	untreated d14	281	OvC4		775650	5.06473e+06	1.4822e+07	28727.6	674715	5.33883e+06	86590.6	841069	739173	569107	122466	1.33536e+07	4.85849e+06	298918	387608	6.30952e+06	8.24638e+06	921587	137920	2.59839e+06	189587	386368	417572	33165.7	300166	2.15955e+06	419853	404519	8.14535e+06	115785	482094	143937	288050	228156	169305	1.00576e+06
CS25099	281 B2 d14	untreated d14	281	OvC4		227734	6.79589e+06	1.37476e+07	33053.7	517575	7.47467e+06	103695	838440	627073	579404	76119.8	1.31596e+07	3.98486e+06	308721	330757	2.5418e+06	7.43893e+06	674385	143541	2.46365e+06	182021	340835	455318	33917.9	393669	1.91871e+06	404348	508341	4.27866e+06	119122	538345	120219	298112	74826.7	135105	1.02576e+06
CS25100	281 B1 d21	untreated d21	281	OvC4		429405	4.86397e+06	1.3781e+07	25203.1	562306	5.23421e+06	87309.2	648436	575173	679533	91599.1	1.21831e+07	3.91788e+06	319161	336625	3.29369e+06	6.9318e+06	722763	135871	2.11917e+06	171609	412487	447444	26869.6	253331	1.91322e+06	320899	451993	4.55278e+06	125524	416553	131060	192437	93651.6	84082.7	1.21257e+06
CS25101	281 B2 d21	untreated d21	281	OvC4		68978.7	4.89555e+06	1.56654e+07	37840.8	533519	4.95636e+06	140071	681635	660810	564244	106749	1.39314e+07	3.43549e+06	310701	301201	1.62403e+06	5.30648e+06	717977	127942	2.90028e+06	116627	411740	414236	35855.1	354149	1.7917e+06	294914	802596	4.35778e+06	126076	459941	135252	293703	2567.6	74548.7	1.28567e+06
CS25102	281 C1 d14	carboplatin d14	281	OvC4		133437	8.4392e+06	1.41214e+07	1.1809e+07	776254	7.92529e+06	101952	908932	690779	626584	69213.7	1.22693e+07	4.07139e+06	329841	413457	6.23981e+06	6.23074e+06	793574	151515	3.03133e+06	92948.3	400407	442040	16120.4	543639	1.93447e+06	383664	985372	5.80431e+06	121908	434596	255359	126159	508735	201284	1.00201e+06
CS25103	281 C2 d14	carboplatin d14	281	OvC4		234272	5.07358e+06	1.23155e+07	1.09821e+07	399560	5.87842e+06	71399.3	179311	685242	534223	88482.7	1.6316e+07	3.16126e+06	344699	330299	1.90389e+06	7.40971e+06	904705	138625	2.46794e+06	60730.7	385789	429252	18956.7	222012	1.83107e+06	401240	416018	2.0964e+06	125461	443261	131918	80658.1	216865	53743.2	1.62023e+06
CS25104	281 C1 d21	carboplatin d21	281	OvC4		289187	5.77857e+06	1.46886e+07	1.12885e+07	419160	6.17531e+06	110621	121082	712920	618394	72582.9	1.72898e+07	2.62653e+06	315821	277172	703296	5.58413e+06	804368	172241	2.82018e+06	29573.1	381615	418416	7467.85	318464	1.96116e+06	424251	446756	1.5791e+06	128613	491044	122086	990.41	185402	52210.6	1.74317e+06
CS25105	281 C2 d21	carboplatin d21	281	OvC4		144414	4.14329e+06	1.49633e+07	1.01704e+07	329663	4.50519e+06	108268	133517	685059	675484	79882.8	1.65296e+07	2.94134e+06	340507	278220	964346	6.88656e+06	697307	132046	2.52731e+06	73234.7	362159	480249	7803.92	136355	1.80034e+06	268527	610289	1.61449e+06	131756	375910	111770	1224.48	175937	37356.8	1.44711e+06
CS25106	281 D1 d14	paclitaxel d14	281	OvC4		673178	6.41699e+06	1.42394e+07	25650	546751	7.26344e+06	128175	505773	631902	640903	90006.1	1.35718e+07	4.189e+06	326258	286567	3.78515e+06	8.23067e+06	1.01957e+06	166717	2.70981e+06	125201	382275	468205	29142.7	389628	2.22627e+06	399614	420062	4.1292e+06	129922	514739	131424	3310.42	259171	67914.7	1.45385e+06
CS25107	281 D2 d14	paclitaxel d14	281	OvC4		264386	7.15808e+06	1.52712e+07	24398	422304	8.43169e+06	111063	392332	688227	665292	94400.3	1.29496e+07	3.7502e+06	343596	372958	4.7032e+06	8.50303e+06	837989	150282	2.23343e+06	57952.6	337596	475313	26899.9	399585	1.89245e+06	324140	429220	3.6354e+06	124580	552706	112447	1803.3	221441	62349.4	1.56728e+06
CS25108	281 D1 d21	paclitaxel d21	281	OvC4		295708	4.60263e+06	1.56411e+07	28934.7	462732	5.45529e+06	120232	405670	640640	592876	74893.9	1.24798e+07	3.19929e+06	342209	336466	2.65975e+06	7.34568e+06	875159	163745	2.10967e+06	106279	386844	455614	16607.9	397820	1.94358e+06	239117	456991	2.22448e+06	113569	474401	165992	1664.49	161797	32918.2	1.53891e+06
CS25109	281 D2 d21	paclitaxel d21	281	OvC4		199043	4.71159e+06	1.47003e+07	27547	375591	5.79745e+06	119044	345917	600710	615774	66571.7	1.67897e+07	2.22781e+06	322498	343865	2.91525e+06	6.91113e+06	709807	139456	2.56224e+06	80540.5	389981	442591	8968.38	395401	1.94606e+06	291908	449045	2.26372e+06	131758	494833	121277	6270.84	145220	37792.4	1.45244e+06
CS25110	281 E1 d14	carboplatin + paclitaxel d14	281	OvC4		169507	6.30135e+06	1.45214e+07	1.25214e+07	348104	8.14454e+06	125421	312818	662921	637306	65421.1	1.41624e+07	2.62085e+06	312768	297532	1.48521e+06	8.0867e+06	829691	153183	2.57451e+06	110576	383251	464831	42101.7	392505	2.09326e+06	395237	436414	1.52635e+06	122213	526184	135972	1865.27	284570	50779.3	1.56036e+06
CS25111	281 E2 d14	carboplatin + paclitaxel d14	281	OvC4		412822	4.28641e+06	1.33874e+07	1.10867e+07	402798	5.42418e+06	116446	234948	619817	538356	92009.9	1.51126e+07	3.24383e+06	347718	273884	5.41102e+06	7.11746e+06	784588	134301	2.20425e+06	65536.5	372507	432569	23485	333407	1.73696e+06	214740	448767	1.30988e+06	126768	487635	128761	1357.99	356770	58628.2	1.60832e+06
CS25112	281 E1 d21	carboplatin + paclitaxel d21	281	OvC4		263999	4.23767e+06	1.40853e+07	1.10841e+07	281699	4.8968e+06	132247	192045	682639	593596	103284	1.7199e+07	2.01412e+06	301030	264743	592777	7.425e+06	784560	137281	2.44181e+06	92275.8	378526	441776	12774	311713	1.85765e+06	324373	419647	1.09732e+06	118073	514680	146994	110.226	132460	29260.3	1.87783e+06
CS25113	281 E2 d21	carboplatin + paclitaxel d21	281	OvC4		652859	1.68823e+06	1.503e+07	8.86564e+06	243263	2.61446e+06	126411	86108.5	554123	620619	75174.5	1.63275e+07	2.31681e+06	335263	202118	413610	6.09879e+06	635167	124678	2.26424e+06	26374	370831	422046	7309.59	241624	1.57307e+06	437737	431957	532549	125014	412922	118279	1987.56	121153	19077.1	1.69832e+06
CS25114	282 B1 d14	untreated d14	282	OvC2		1.30023e+06	7.41393e+06	1.42737e+07	28072.9	960458	8.3748e+06	82575.3	723277	735273	633570	70919.4	1.07785e+07	4.29866e+06	316537	367737	5.82047e+06	8.65024e+06	1.18653e+06	187378	2.35812e+06	182417	357127	468464	56157.5	331827	2.65079e+06	433863	425837	6.27042e+06	117867	633545	130500	64373.6	166434	143366	1.1973e+06
CS25115	282 B2 d14	untreated d14	282	OvC2		1.85633e+06	5.26673e+06	1.46092e+07	26443.8	420686	5.59529e+06	93329.5	230193	609804	605095	115792	1.93157e+07	3.19216e+06	330634	372217	2.9356e+06	7.10373e+06	836316	140028	2.2327e+06	63273.8	396525	503786	39379.5	271174	2.13435e+06	393083	414059	2.50948e+06	124758	566215	108807	18209.6	210715	54496.5	1.5859e+06
CS25116	282 B1 d21	untreated d21	282	OvC2		449009	5.02364e+06	1.42574e+07	29341.5	688980	5.48043e+06	108967	604962	701471	618148	68135.3	1.11475e+07	3.90779e+06	323011	342658	2.79166e+06	7.31877e+06	1.03543e+06	154356	2.33452e+06	146691	358781	454823	53177.6	290126	2.24921e+06	417813	420904	5.45686e+06	131514	533149	104699	90792.7	81640.5	74478.3	1.26981e+06
CS25117	282 B2 d21	untreated d21	282	OvC2		789837	4.05684e+06	1.06398e+07	22718.2	381351	4.34314e+06	112664	264692	569962	640895	90486.5	1.76333e+07	3.07151e+06	334796	277825	2.25383e+06	6.98054e+06	749954	150208	2.30313e+06	60129.9	367117	433085	13253.5	275153	2.04717e+06	331151	386563	2.09539e+06	129213	456418	154402	115600	109928	41131.3	1.70489e+06
CS25118	282 C1 d14	carboplatin d14	282	OvC2		837536	5.2428e+06	1.47615e+07	1.24936e+07	401678	5.62919e+06	106850	184257	676299	656538	107154	1.81554e+07	2.41403e+06	331129	327424	1.19076e+06	8.17873e+06	868021	160426	2.33946e+06	91150.6	402401	439682	48302.1	290529	2.15126e+06	454928	415818	1.74737e+06	128397	589777	123419	8333.18	248451	42492	1.96059e+06
CS25119	282 C2 d14	carboplatin d14	282	OvC2		527535	5.33868e+06	1.53027e+07	1.09073e+07	542002	6.7897e+06	82384.4	249223	627441	702553	83169.5	1.25958e+07	2.63502e+06	355411	335327	2.3939e+06	7.38339e+06	848988	142745	1.94846e+06	16302.2	342759	505004	44803.3	86931	2.20713e+06	209368	507947	3.13815e+06	123903	538472	149020	46454.3	213935	56477.3	1.62116e+06
CS25120	282 C1 d21	carboplatin d21	282	OvC2		520428	4.2926e+06	1.31091e+07	1.27712e+07	383084	5.77676e+06	115829	57926.2	624548	613497	71008.7	2.01017e+07	2.19847e+06	337045	254860	729582	7.54988e+06	977758	179607	2.35656e+06	113357	373497	465387	24556.6	283492	2.4341e+06	322535	407639	1.44136e+06	124429	487898	107734	39700	222322	34560.1	2.18027e+06
CS25121	282 C2 d21	carboplatin d21	282	OvC2		231710	4.62486e+06	1.43878e+07	9.89095e+06	477170	5.43378e+06	91885.8	140358	629789	638188	81797.6	2.38607e+07	2.31795e+06	335484	289523	918647	6.56926e+06	822003	126989	2.2144e+06	58156.6	406695	435299	16724.3	279675	1.82282e+06	252983	422002	2.73185e+06	130082	441977	131577	7167.59	133053	33707.2	1.70589e+06
CS25122	282 D1 d14	paclitaxel d14	282	OvC2		756305	4.00602e+06	1.56474e+07	32781.6	451766	5.35744e+06	110464	199530	647010	654336	72357.5	1.56876e+07	2.78398e+06	349884	332152	2.38898e+06	7.5641e+06	891486	173408	2.31787e+06	42579.5	357263	454944	35242.8	409607	2.05374e+06	364973	427145	1.40507e+06	122294	541710	116873	815.374	214118	44481.4	1.71357e+06
CS25123	282 D2 d14	paclitaxel d14	282	OvC2		818140	4.75363e+06	1.62349e+07	25517.4	599222	5.42e+06	119261	321174	640297	641499	83629.5	1.85946e+07	2.84066e+06	353709	229748	2.2932e+06	8.18354e+06	917401	165911	2.19394e+06	88125.9	381057	457896	42904.1	437645	2.17828e+06	322429	413430	1.32861e+06	129556	592054	110487	14686.8	244991	52354.3	1.71419e+06
CS25124	282 D1 d21	paclitaxel d21	282	OvC2		431985	3.56663e+06	1.23896e+07	25507.3	416812	4.53953e+06	119376	210719	551856	645866	91614.3	1.51246e+07	2.28542e+06	352205	314034	1.7037e+06	7.38239e+06	751864	142431	2.14241e+06	91140	386536	464078	24470.3	117959	1.89453e+06	349828	402982	1.12938e+06	129575	584538	180150	47293.7	186925	12680.6	1.87843e+06
CS25125	282 D2 d21	paclitaxel d21	282	OvC2		393659	4.52708e+06	1.44419e+07	25257	569923	4.91108e+06	100593	307305	548608	592428	79164.3	1.32926e+07	2.09629e+06	302027	259656	1.58703e+06	7.29864e+06	925882	146811	2.02546e+06	122466	381205	447882	32946.9	442168	2.05845e+06	258273	429283	1.89046e+06	116081	585743	113007	160724	107931	26335.5	1.67957e+06
CS25126	282 E1 d14	carboplatin + paclitaxel d14	282	OvC2		430493	5.14411e+06	1.59658e+07	1.30299e+07	413263	6.18087e+06	100859	209974	668015	560718	92385	1.62082e+07	2.80608e+06	342301	360596	599485	7.86085e+06	840445	153689	2.17731e+06	100391	357207	455501	39890.6	355800	2.46857e+06	361642	457254	1.22678e+06	108266	517922	130120	90797.4	244650	36896	2.08073e+06
CS25127	282 E2 d14	carboplatin + paclitaxel d14	282	OvC2		767709	4.1059e+06	1.45371e+07	1.01937e+07	462237	4.52468e+06	98136.3	361190	538025	639070	112822	1.41587e+07	2.85898e+06	359952	219932	2.6463e+06	6.90084e+06	941211	137736	2.16188e+06	74914.9	353452	489592	43230.7	433311	2.11276e+06	262536	416842	1.69063e+06	117010	511169	117411	56471.8	301713	68804.8	1.37781e+06
CS25128	282 E1 d21	carboplatin + paclitaxel d21	282	OvC2		393125	3.32075e+06	1.56439e+07	1.20692e+07	349021	5.43111e+06	102728	188134	588647	592505	66005.2	1.79118e+07	2.5753e+06	306009	248264	467104	8.43354e+06	932930	149615	2.21569e+06	68269	281782	445288	14558.7	334012	2.13709e+06	352373	416789	838802	127642	547973	156354	104751	200400	21429.5	2.2198e+06
CS25129	282 E2 d21	carboplatin + paclitaxel d21	282	OvC2		1.06656e+06	2.06587e+06	1.40714e+07	9.72488e+06	358046	2.79046e+06	85313.3	177958	522935	582008	104094	1.51734e+07	2.04776e+06	314846	209956	550091	6.3202e+06	738725	126020	1.83358e+06	85230.2	373093	460021	9412.65	260654	1.67148e+06	339487	400763	656097	125106	462681	199343	74216.8	144099	36853.5	1.76627e+06
CS25130	283 B1 d14	untreated d14	283	OvC3		785097	4.77442e+06	1.45663e+07	37686.2	445937	5.56673e+06	82232.2	261530	617077	625781	67961.2	1.24648e+07	3.78131e+06	337002	319371	3.49407e+06	7.31459e+06	767366	139669	2.24228e+06	110297	356643	423433	181139	196997	1.90898e+06	306590	737855	2.60182e+06	123195	451115	123049	243875	191064	75430.3	1.33251e+06
CS25131	283 B2 d14	untreated d14	283	OvC3		578111	4.76553e+06	1.25198e+07	23383.1	499395	5.66379e+06	83508.4	385271	566459	591656	72258.5	1.27652e+07	3.75092e+06	311950	339381	3.98203e+06	5.11733e+06	865533	134759	2.28626e+06	147582	371670	470130	326982	478738	1.72397e+06	334914	449986	3.73022e+06	124953	453529	107194	312329	174026	95432.3	1.27872e+06
CS25132	283 B1 d21	untreated d21	283	OvC3		677762	4.11898e+06	1.45139e+07	25928.1	249919	5.67205e+06	44301.1	270725	620585	563193	71982.2	1.03172e+07	7.45242e+06	335065	391255	2.44642e+06	8.36013e+06	853407	144033	2.44085e+06	105983	370410	429338	90010.3	155793	1.93126e+06	413535	687282	1.60909e+06	117199	550386	120052	317697	147695	39446.3	1.74069e+06
CS25133	283 B2 d21	untreated d21	283	OvC3		692254	6.34052e+06	1.46656e+07	26577.9	488742	8.58545e+06	51840	234736	631810	582500	111024	1.29378e+07	6.08448e+06	317902	330533	2.86191e+06	5.6858e+06	828168	156721	2.45059e+06	147998	399999	468349	195473	343606	2.02873e+06	401983	715783	3.20172e+06	113580	551781	171068	317273	152401	68803.1	1.3098e+06
CS25134	283 C1 d14	carboplatin d14	283	OvC3		284482	6.38153e+06	1.37762e+07	1.09896e+07	425222	7.91586e+06	88828.2	223919	674590	565827	112525	1.39169e+07	3.58574e+06	285866	300285	3.36667e+06	7.44747e+06	953383	145770	2.7256e+06	112564	364343	432908	189734	574837	2.01667e+06	374264	411936	1.59366e+06	120803	493873	131251	137249	410464	79665	1.71104e+06
CS25135	283 C2 d14	carboplatin d14	283	OvC3		327015	5.79219e+06	1.44348e+07	1.08809e+07	379279	7.03482e+06	87368.6	266445	663382	541057	90433.6	1.31196e+07	3.51128e+06	288549	286829	2.82289e+06	7.53551e+06	745741	140215	2.24455e+06	39006.5	364244	433672	110622	242946	1.96348e+06	272755	507000	1.68813e+06	120733	511863	145181	193809	310497	65190.4	1.59769e+06
CS25136	283 C1 d21	carboplatin d21	283	OvC3		189302	3.67621e+06	1.4452e+07	1.25014e+07	190140	5.37675e+06	31100.1	213109	685254	627647	67060.1	1.68496e+07	6.90717e+06	317667	250877	760945	7.95391e+06	900285	146398	2.36704e+06	66284.3	370796	452547	23242.5	352151	2.41749e+06	379565	705336	588840	128007	577506	145065	309419	248124	40100.4	2.0549e+06
CS25137	283 C2 d21	carboplatin d21	283	OvC3		240147	3.64026e+06	9.631e+06	1.31653e+07	205655	5.61544e+06	40725.1	144122	641983	600045	89921.4	1.67311e+07	7.13084e+06	345578	266759	808128	8.10836e+06	946452	149441	2.59963e+06	93194.3	380834	445305	12257.5	140112	2.06887e+06	381555	415047	968045	122620	508044	132328	367651	216014	38818	2.05176e+06
CS25138	283 D1 d14	paclitaxel d14	283	OvC3		322750	7.15409e+06	1.40302e+07	27156.4	548132	7.40608e+06	98575.9	686107	617342	631520	68090.5	1.18994e+07	3.65106e+06	305249	385563	4.62877e+06	7.66632e+06	750361	154928	2.54034e+06	263543	369449	449044	446493	807675	2.22348e+06	315255	712968	4.43986e+06	122710	578623	116924	416199	269511	199701	946722
CS25139	283 D2 d14	paclitaxel d14	283	OvC3		396385	7.16168e+06	1.57864e+07	27284.5	561239	7.29476e+06	87283.7	754080	615858	533642	71878.5	1.15069e+07	3.60631e+06	300984	393151	4.59685e+06	7.91542e+06	867627	156972	2.18073e+06	265203	429295	446370	444104	871135	2.17191e+06	356554	657241	5.34888e+06	119533	544719	130686	382311	310696	207823	965376
CS25140	283 D1 d21	paclitaxel d21	283	OvC3		404182	6.4361e+06	1.68209e+07	27968.8	382847	7.05785e+06	45357.3	551684	725618	584938	67907.9	1.37825e+07	7.96552e+06	311989	331401	2.30986e+06	9.03206e+06	1.12366e+06	183723	2.64271e+06	218639	358121	404742	249645	723412	2.78152e+06	455809	743778	3.19658e+06	119602	670518	120704	609153	214909	124320	1.29294e+06
CS25141	283 D2 d21	paclitaxel d21	283	OvC3		400290	5.10384e+06	1.59268e+07	25900.3	293110	5.41405e+06	45146.5	431458	714099	534107	84836.7	1.43323e+07	6.82778e+06	346492	244398	2.05389e+06	8.17356e+06	888549	163099	2.74067e+06	212730	402264	378626	196442	587008	2.15139e+06	430777	714346	2.67569e+06	119069	526342	132119	494629	155990	89639.2	1.37082e+06
CS25142	283 E1 d14	carboplatin + paclitaxel d14	283	OvC3		222581	5.38297e+06	1.5045e+07	1.15716e+07	421112	6.55923e+06	94532	387745	626977	575984	102006	1.41215e+07	3.6108e+06	318613	321771	3.66036e+06	7.87944e+06	890100	176147	2.90739e+06	130933	339880	413297	282237	856000	2.23961e+06	253697	417570	953702	119451	656142	150553	251769	606971	118716	1.65605e+06
CS25143	283 E2 d14	carboplatin + paclitaxel d14	283	OvC3		296412	5.55097e+06	1.43646e+07	1.12702e+07	422673	6.18878e+06	88087.1	389478	565426	644266	67367.2	1.35037e+07	3.55459e+06	305254	321206	3.5795e+06	7.22305e+06	770866	149274	2.17993e+06	133170	330469	454653	303356	1.22476e+06	1.84907e+06	310214	443876	1.00994e+06	121600	571242	184303	172152	757690	119121	1.40912e+06
CS25144	283 E1 d21	carboplatin + paclitaxel d21	283	OvC3		740681	855640	1.43659e+07	1.51498e+07	235422	1.14243e+06	55031.9	171007	693488	623783	68635.1	1.88567e+07	7.20633e+06	323733	286084	697625	9.71169e+06	1.07471e+06	205849	2.46717e+06	80698.9	358918	442054	15560.6	199693	2.75797e+06	417403	569301	257778	121133	580694	133186	432939	269615	25124.2	2.55451e+06
CS25145	283 E2 d21	carboplatin + paclitaxel d21	283	OvC3		1.19078e+06	172005	1.43452e+07	1.31108e+07	199487	260710	40878.2	166281	688792	648486	86663.4	1.90433e+07	6.30702e+06	346934	281814	456154	8.22602e+06	907799	158891	2.6587e+06	66458.8	362032	473789	10044.2	346012	2.44836e+06	459198	720698	186866	123586	682681	118373	336630	221464	3098.93	2.36207e+06
CS25146	287 B1 d14	untreated d14	287	OvC6		128300	8.32384e+06	1.65107e+07	37121	1.20857e+06	9.39733e+06	222666	1.42409e+06	737212	616439	86272.6	1.26219e+07	5.4037e+06	372341	348815	1.07678e+06	8.88442e+06	1.01011e+06	163205	3.53974e+06	263667	414177	521493	950070	336757	2.34544e+06	316773	446962	7.19395e+06	123945	913336	125371	398948	53687.5	149138	1.11252e+06
CS25147	287 B2 d14	untreated d14	287	OvC6		73455	8.21081e+06	1.49604e+07	41470.6	996697	8.93275e+06	145554	1.7937e+06	673321	584663	76739.9	2.12256e+07	5.99365e+06	348448	346784	873302	7.7486e+06	873780	156242	2.63043e+06	259880	414715	454840	527163	423774	2.1885e+06	251562	614190	8.67452e+06	126224	812896	116885	388195	411.782	179680	1.09255e+06
CS25148	287 B1 d21	untreated d21	287	OvC6		110851	7.56529e+06	1.60315e+07	43695.7	1.2178e+06	8.49605e+06	200328	1.10405e+06	763465	604075	87557.5	1.31346e+07	5.09252e+06	323701	319075	875177	8.14602e+06	921788	166816	2.5627e+06	282857	409041	461659	971020	404949	2.45825e+06	402212	360693	7.04249e+06	123900	736906	127148	70050	2342.04	89511.2	1.38238e+06
CS25149	287 B2 d21	untreated d21	287	OvC6		27236.9	6.91276e+06	1.48602e+07	35923.8	984043	8.03738e+06	170047	1.60838e+06	756243	614594	78750.9	1.34574e+07	5.77967e+06	320748	348488	733165	8.26158e+06	1.01781e+06	174080	2.39855e+06	250792	397263	470302	368641	531718	2.74194e+06	457921	712756	6.56132e+06	124529	829576	138732	133262	2105.14	85451.7	1.1162e+06
CS25150	287 C1 d14	carboplatin d14	287	OvC6		62730.2	7.60091e+06	1.37266e+07	1.2349e+07	1.07952e+06	8.97104e+06	99267.2	844399	723461	584777	107975	1.41812e+07	5.42635e+06	324319	273110	761338	8.62064e+06	879592	143938	2.32536e+06	261859	349386	469611	441473	500923	2.17484e+06	253339	482019	3.85786e+06	116009	830428	116203	165940	18692.9	101551	1.55493e+06
CS25151	287 C2 d14	carboplatin d14	287	OvC6		77430.8	6.29872e+06	1.50404e+07	1.14695e+07	985850	6.41721e+06	150345	1.24988e+06	695034	591983	73414.5	1.52042e+07	5.388e+06	340464	355723	785055	7.18182e+06	822697	157754	2.45419e+06	195129	421727	466930	278913	521302	2.00643e+06	324960	554802	9.59814e+06	120586	535055	186571	164435	18897.6	244511	765175
CS25152	287 C1 d21	carboplatin d21	287	OvC6		101161	5.02928e+06	1.4828e+07	1.50769e+07	861063	5.90362e+06	83669.5	272400	769332	641044	83918.7	1.6274e+07	4.97301e+06	383659	291218	466667	8.74186e+06	916846	148767	2.49399e+06	141677	343003	476700	37237.7	451343	2.22623e+06	367297	490211	1.41863e+06	124047	689759	113842	2526.65	2441.36	43298.4	2.08221e+06
CS25153	287 C2 d21	carboplatin d21	287	OvC6		205830	3.67436e+06	1.54802e+07	1.08339e+07	570259	3.78463e+06	72917	283359	659214	700880	78246.1	1.61466e+07	3.90554e+06	351201	252324	493021	7.04447e+06	802857	138120	2.31188e+06	86222.6	370485	468795	14788.2	393710	1.68499e+06	298296	717444	1.2408e+06	135328	478859	148857	2045.25	139857	61946.6	1.60385e+06
CS25154	287 D1 d14	paclitaxel d14	287	OvC6		98328	4.57682e+06	1.50892e+07	26422	797227	4.41407e+06	72316.6	755116	606023	581060	69826.7	1.27714e+07	3.61862e+06	297058	356543	731321	7.77162e+06	833912	128828	1.89731e+06	278480	360760	457521	720600	374722	1.91056e+06	260299	405165	3.60237e+06	119827	817178	151096	242658	218143	91488.1	1.11399e+06
CS25155	287 D2 d14	paclitaxel d14	287	OvC6		88733.8	5.24105e+06	1.39144e+07	25691.6	793062	4.90242e+06	91021	881687	626770	630419	103486	1.21319e+07	3.80446e+06	290328	288799	798497	7.21679e+06	842745	138480	2.30344e+06	289319	366325	450678	590822	382994	1.96057e+06	392116	479062	4.6228e+06	126280	702343	128608	246640	34295.7	104563	999977
CS25156	287 D1 d21	paclitaxel d21	287	OvC6		181760	3.11825e+06	1.48137e+07	29819.5	569073	3.27408e+06	55084.6	317505	625828	616297	71662.7	1.50767e+07	3.63844e+06	341366	241842	495149	7.33241e+06	808854	134003	1.97243e+06	180893	360838	437700	177428	332144	2.11641e+06	323227	402171	1.77631e+06	124339	606651	113347	2148.52	172481	42851.4	1.62589e+06
CS25157	287 D2 d21	paclitaxel d21	287	OvC6		100894	3.63148e+06	1.55127e+07	26958.6	576319	4.09848e+06	71758.3	461736	587542	599760	97258.5	1.9934e+07	4.09367e+06	341991	257579	586240	7.63906e+06	675599	124885	1.93456e+06	216849	391392	402142	177652	362688	1.7398e+06	195224	412308	2.05575e+06	112489	567421	136991	25819	15824.3	48563.7	1.32917e+06
CS25158	287 E1 d14	carboplatin + paclitaxel d14	287	OvC6		77626.2	6.24031e+06	1.62188e+07	1.02948e+07	809515	6.05161e+06	73574.5	1.28153e+06	645607	620539	88695.3	1.47691e+07	4.7582e+06	314242	276781	791771	7.10729e+06	842422	142518	2.9143e+06	151477	371408	411492	262599	499863	2.08657e+06	248647	442657	4.19026e+06	119646	548582	125028	33563.7	148319	110605	1.13817e+06
CS25159	287 E2 d14	carboplatin + paclitaxel d14	287	OvC6		76219.7	4.78452e+06	1.5806e+07	9.77206e+06	554643	4.79581e+06	80586.5	878910	606795	712389	96782.3	1.36919e+07	4.49485e+06	365063	257074	617602	6.16014e+06	761511	125467	2.22613e+06	192271	411150	488477	196198	550743	1.67476e+06	240267	557817	4.7257e+06	126771	478476	108765	76878.5	6865.84	104670	1.18431e+06
CS25160	287 E1 d21	carboplatin + paclitaxel d21	287	OvC6		80336.8	4.69029e+06	1.45279e+07	1.05507e+07	516115	5.31285e+06	64423.5	428762	623376	629314	71415.6	1.47335e+07	4.28607e+06	336738	263372	517965	7.13261e+06	795606	142954	2.01242e+06	108610	360788	444651	17397.7	424637	1.9114e+06	254546	426597	1.92511e+06	124603	512631	124543	2666.53	109523	44403.5	1.55516e+06
CS25161	287 E2 d21	carboplatin + paclitaxel d21	287	OvC6		121796	2.8898e+06	1.64695e+07	9.91634e+06	411563	3.90494e+06	68359.1	263355	636807	618668	91807.3	1.55145e+07	4.14561e+06	390756	227632	388942	7.36083e+06	647572	123661	1.92074e+06	168312	361369	448874	21849.4	140270	1.80292e+06	205935	390457	1.10075e+06	124613	513434	129233	60242	4293.85	2432.51	1.73794e+06
CS25162	290 B1 d14	untreated d14	290	OvC7		156668	9.90073e+06	1.42015e+07	26009.6	1.10223e+06	1.14758e+07	190330	1.42134e+06	650344	595017	94473.1	1.51663e+07	5.39145e+06	317032	295901	1.35412e+06	7.83283e+06	891508	141059	2.48965e+06	169318	395771	548120	76375.2	647735	2.10022e+06	227186	565441	5.98947e+06	113631	789514	128957	476951	97651.5	104633	1.23241e+06
CS25163	290 B2 d14	untreated d14	290	OvC7		170807	1.22581e+07	1.43363e+07	27050	1.38259e+06	1.38703e+07	223521	1.57515e+06	726659	642109	92874.6	1.4128e+07	4.95889e+06	337510	252654	1.209e+06	8.20626e+06	864100	162921	2.26284e+06	173779	361022	477784	90745.1	889396	2.45084e+06	430350	476246	8.66979e+06	124509	844106	155121	561999	79953.3	168521	1.02794e+06
CS25164	290 B1 d21	untreated d21	290	OvC7		196997	1.21485e+07	1.42385e+07	26904.8	1.20808e+06	1.50005e+07	140244	1.05279e+06	734995	690289	103809	1.49991e+07	3.9655e+06	359731	273819	830882	7.7482e+06	814338	154522	3.57826e+06	183593	386953	457073	43591.6	443325	2.08964e+06	300167	407428	5.2501e+06	129733	661346	132759	219603	24438.7	69841.8	1.39437e+06
CS25165	290 B2 d21	untreated d21	290	OvC7		89205.7	9.48417e+06	1.4058e+07	26718.4	1.09306e+06	1.03316e+07	120913	1.03977e+06	691415	624745	75416.7	1.40668e+07	4.16782e+06	312910	276350	856752	6.88831e+06	872090	140114	2.26495e+06	155905	349447	504497	51098	510685	2.03989e+06	265968	449215	5.2921e+06	118933	606296	144409	308355	1652.82	78255.3	997659
CS25166	290 C1 d14	carboplatin d14	290	OvC7		83089.8	9.72804e+06	1.26626e+07	1.38599e+07	932455	1.0985e+07	195713	719556	646197	645148	81986.1	1.80169e+07	4.0159e+06	330663	295943	1.43586e+06	8.28158e+06	1.18611e+06	161712	2.45379e+06	148792	361392	506863	96354.9	1.01278e+06	2.60055e+06	372062	441323	1.82253e+06	113650	798616	116526	383091	1689.98	72406.2	1.75475e+06
CS25167	290 C2 d14	carboplatin d14	290	OvC7		158211	7.74449e+06	1.44576e+07	1.34223e+07	733926	8.11926e+06	120648	387850	641515	606052	82070	1.83645e+07	3.55138e+06	325070	286884	1.46947e+06	7.64329e+06	773178	165251	2.38805e+06	133016	388329	412851	52672.7	728534	2.23263e+06	322074	396230	1.25046e+06	124819	566823	135266	288002	409740	77341.1	1.59418e+06
CS25168	290 C1 d21	carboplatin d21	290	OvC7		112809	4.57512e+06	1.45755e+07	1.33184e+07	654331	5.71467e+06	105125	234966	799941	586170	100332	2.2133e+07	3.54982e+06	340127	253751	544131	7.9434e+06	959042	174645	2.9393e+06	100680	396127	463526	19476.5	476627	2.70028e+06	508520	491396	1.09299e+06	117271	651249	124299	171789	123.462	29431.2	2.27874e+06
CS25169	290 C2 d21	carboplatin d21	290	OvC7		175946	3.59794e+06	1.38911e+07	1.26412e+07	529574	4.5033e+06	78486	182565	738954	706486	71904.9	2.09347e+07	3.36998e+06	332903	218321	557090	7.48377e+06	820925	156242	2.42701e+06	91357.1	391141	473108	7537.95	289984	2.073e+06	393488	719174	877458	134953	599940	167612	108484	148802	40453.3	1.96767e+06
CS25170	290 D1 d14	paclitaxel d14	290	OvC7		70153.9	5.5336e+06	1.65861e+07	33295.8	803657	5.67537e+06	187769	1.41641e+06	716460	653859	75187	1.35957e+07	4.10472e+06	302941	261763	1.03984e+06	7.7456e+06	952309	136505	2.33648e+06	197204	378961	472023	28250.1	696676	1.94559e+06	241437	503600	5.24634e+06	123440	645506	153853	787404	9895.21	94785.6	1.03769e+06
CS25171	290 D2 d14	paclitaxel d14	290	OvC7		120122	4.66835e+06	1.58771e+07	26565.7	678439	4.72503e+06	136418	880919	682752	664619	69776.8	1.51769e+07	3.51292e+06	312425	277041	1.34686e+06	8.14964e+06	787604	162995	2.3385e+06	180462	358210	484479	39583.6	848965	2.15355e+06	218906	667718	4.58575e+06	133804	678004	107557	530455	126537	82489.2	1.17983e+06
CS25172	290 D1 d21	paclitaxel d21	290	OvC7		76274.7	5.19764e+06	1.58192e+07	32226.3	665690	5.00788e+06	131638	664244	708063	663275	84920.5	1.60724e+07	3.77615e+06	332482	315348	614126	7.59143e+06	831554	138490	2.52252e+06	206471	386949	522326	32252.8	547501	2.13845e+06	272737	444048	1.90713e+06	130678	606083	123959	225214	42519	53404.5	1.62905e+06
CS25173	290 D2 d21	paclitaxel d21	290	OvC7		99991.1	2.65454e+06	1.62186e+07	24958.4	518874	3.32448e+06	103947	334239	669764	664493	70289.7	1.52579e+07	3.05639e+06	326426	259345	726351	6.67687e+06	752338	147190	2.0969e+06	143101	388422	497859	20579.7	403480	1.86027e+06	332121	414691	1.78912e+06	127600	551374	107241	79966.7	95096.4	46444	1.44726e+06
CS25174	290 E1 d14	carboplatin + paclitaxel d14	290	OvC7		113321	5.9285e+06	1.48687e+07	1.22863e+07	707625	6.79377e+06	161342	683799	736671	650292	103547	1.64383e+07	4.04055e+06	324195	292960	884872	8.26401e+06	933004	153893	2.37158e+06	145440	352953	480821	33589.6	662901	2.11203e+06	284070	424553	1.07782e+06	131596	660584	140783	19018.3	195610	84280.9	1.79963e+06
CS25175	290 E2 d14	carboplatin + paclitaxel d14	290	OvC7		76675.4	3.76022e+06	1.51436e+07	1.16089e+07	464341	3.53177e+06	133193	381855	626761	717536	81499.1	1.67652e+07	3.62333e+06	316946	227754	936913	7.26134e+06	796436	135246	2.21075e+06	106498	367070	515259	44513.8	499297	2.06419e+06	414693	645911	585781	115498	590844	106446	6796.12	329174	68227.8	1.54714e+06
CS25176	290 E1 d21	carboplatin + paclitaxel d21	290	OvC7		215361	1.15916e+06	1.32052e+07	1.22597e+07	404508	1.46758e+06	122177	68790.9	711441	597597	105699	2.20581e+07	4.46983e+06	361990	231635	397055	8.07054e+06	870768	136750	2.30238e+06	107703	375215	467648	8323.34	251915	2.11606e+06	317087	408397	262812	131858	617526	156582	376.142	160698	39638	2.3826e+06
CS25177	290 E2 d21	carboplatin + paclitaxel d21	290	OvC7		211892	164932	1.42669e+07	1.02487e+07	298432	211991	93358.1	174945	646321	688161	72196.8	1.89143e+07	3.74574e+06	330107	195316	319767	7.10668e+06	643972	120122	2.18685e+06	20848.4	368634	462379	8850.72	50047.5	1.74984e+06	359909	436473	235696	143509	467770	118709	2852.28	156798	20523.3	1.98497e+06
CS25178	media only 1	media baseline control	media			416123	300844	1.59697e+07	25034	213403	122899	67103.4	94771.6	685393	658748	102833	1.83353e+07	6.92502e+06	328622	172840	345720	7.35429e+06	871013	137822	2.30137e+06	83206.8	305644	520657	11618.6	251986	1.95604e+06	362213	633896	179912	119335	547990	108705	2642.81	56801	8658.81	2.15389e+06
CS25179	media only 2	media baseline control	media			438046	372792	1.32862e+07	36416.9	213779	95105.8	59529.2	167384	838420	629863	122325	1.8808e+07	8.03816e+06	319401	300575	401717	8.53254e+06	838452	149726	2.88298e+06	79950	366888	475527	10118.9	248882	2.08674e+06	280326	719763	225657	133580	605258	144086	3199.79	27808.3	23327.9	2.418e+06
CS25180	media + SOC 1	media + drugs baseline control	media			527036	34698.6	1.36907e+07	1.41964e+07	209757	302344	71282.6	150906	653617	603233	100630	2.26544e+07	6.66775e+06	311582	240665	359719	7.64417e+06	996194	156664	2.49271e+06	69866.2	322754	461691	13101.3	260954	2.16814e+06	482120	481852	118389	128695	711953	137000	365.388	30311.2	1090.71	2.37022e+06
CS25181	media + SOC 2	media + drugs baseline control	media			467488	37067.3	1.34748e+07	1.39914e+07	278758	60856.4	86567.2	100067	803732	649244	115109	2.01028e+07	7.2306e+06	353786	230630	386138	8.23723e+06	978579	174496	3.15352e+06	52043.6	360357	459246	5841.49	284328	2.4629e+06	516941	461157	67648.5	128679	494500	153298	697.855	45955.1	25761	2.58128e+06

## Sheet: Annotation level 1
						DP	28.4268	11.5332	5.5398	30.6731	9.52356	12.3228	12.3804	6.04577	1.23067	3.39407	2.37398	2.29745	1.3433	1.349	5.78685	5.53862	0.78574	2.07285	3.17277	4.38741	1.81217	5.50751	3.44219	2.84139	14.9034	2.69887	9.90788	29.2836	11.893	2.6222	1.23792	2.89754	2.30491	4.12966	23.1738	4.14122	1.08287	2.62279	6.63274	2.95809	3.12127	2.86774	3.60726
						Relative precision (%)	5.68773	12.0237	4.28378	5.81505	8.5887	8.84357	6.49194	4.0608	4.29428	4.10233	6.4743	3.98475	15.9823	14.0449	3.46391	10.1166	14.3336	4.21224	3.46655	5.27772	5.7596	3.7414	7.35159	4.13934	10.4695	3.18934	4.65999	3.02083	4.34661	3.53948	12.7777	7.49981	4.70045	8.77831	5.24753	4.72249	7.8991	3.24858	5.12053	3.09458	5.08077	5.43186	3.95131
						LOD	10962.7	196529	46150.4	141015	32484.2	63103.7	76794.4	49124.2	17190.6	26947.3	3.16012e+06	162076	490922	74015.2	222431	102818	172827	150122	299099	30447.2	64133.6	1.14615e+06	1.28736e+06	33440.7	144752	1.61899e+06	361913	88249.5	1.31317e+07	1.97354e+06	429426	38522	109753	26151.1	7489.16	210972	82996.3	571269	1.18405e+06	63826	1.93719e+06	1.11026e+06	104224
						RT [min]	4.508	4.591	1.334	6.932	2.065	4.517	4.752	1.545	1.157	1.328	1.285	5.495	1.39	1.376	1.262	2.297	1.3	1.531	1.534	1.123	6.205	1.214	1.218	6.407	4.238	3.755	6.189	5.289	2.07	4.094	1.068	1.23	2.307	1.311	1.492	4.674	5.748	5.522	1.467	4.753	4.545	2.603	4.248
						Molecular Weight	281.112	104.047	169.085	166.063	132.054	128.059	165.065	145.11	89.0477	174.112	117.079	231.147	161.105	226.107	103.1	192.027	175.096	131.069	113.059	240.024	441.14	147.053	180.063	179.058	136.038	131.095	245.163	208.085	90.0317	131.095	146.106	182.079	149.051	165.046	187.168	122.048	219.111	165.079	115.063	217.131	169.074	129.043	118.027
						Formula	C11 H15 N5 O4	C4 H8 O3	C7 H11 N3 O2	C9 H10 O3	C4 H8 N2 O3	C5 H8 N2 O2	C6 H7 N5 O	C7 H15 N O2	C3 H7 N O2	C6 H14 N4 O2	C5 H11 N O2	C11 H21 N O4	C7 H15 N O3	C9 H14 N4 O3	C5 H13 N O	C6 H8 O7	C6 H13 N3 O3	C4 H9 N3 O2	C4 H7 N3 O	C6 H12 N2 O4 S2	C19 H19 N7 O6	C5 H9 N O4	C6 H12 O6	C9 H9 N O3	C5 H4 N4 O	C6 H13 N O2	C12 H23 N O4	C10 H12 N2 O3	C3 H6 O3	C6 H13 N O2	C6 H14 N2 O2	C6 H14 O6	C5 H11 N O2 S	C5 H11 N O3 S	C9 H21 N3 O	C6 H6 N2 O	C9 H17 N O5	C9 H11 N O2	C5 H9 N O2	C10 H19 N O4	C8 H11 N O3	C5 H7 N O3	C4 H6 O4
						Annotation level	1	1	1	1	1	1	1	1	1	1	1	1	1	1	1	1	1	1	1	1	1	1	1	1	1	1	1	1	1	1	1	1	1	1	1	1	1	1	1	1	1	1	1
						Name	1-Methyl Adenosine	3-Hydroxybutyric acid	3-Methylhistidine	3-Phenyllactic acid	3-Ureidopropionic acid	5,6-Dihydro Thymine	7-Methylguanine	Acetylcholine	Alanine	Arginine	Betaine	Butyrylcarnitine	Carnitine	Carnosine	Choline	Citric acid	Citrulline	Creatine	Creatinine	Cystine	Folic acid	Glutamic acid	Hexose	Hippuric acid	Hypoxanthine	Isoleucine	Isovalerylcarnitine	Kynurenine	Lactic acid	Leucine	Lysine	Mannitol/sorbitol	Methionine	Methionine sulfoxide	N8-Acetylspermidine	Nicotine amide	Pantothenic acid	Phenylalanine	Proline	Propionylcarnitine	Pyridoxine	Pyroglutamic acid	Succinic acid
						Compound #	X02147	X01748	X00593	X01426	X01519	X02566	X02526	X02939	X00775	X00239	X00307	X02549	X00005	X03144	X00850	X00105	X00088	X00071	X00367	X00318	X01159	X00218	X00079	X02639	X00036	X00098	X01968	X00798	X00063	X00091	X00317	X00958	X00065	X00467	X01428	X00360	X00008	X00030	X00060	X01103	X00006	X00077	X00177
MS-Omics ID	Customer ID	Treatment	original legend	OvC case		Unit	Area	Area	Area	Area	Area	Area	Area	Area	Area	Area	Area	Area	Area	Area	Area	Area	Area	Area	Area	Area	Area	Area	Area	Area	Area	Area	Area	Area	Area	Area	Area	Area	Area	Area	Area	Area	Area	Area	Area	Area	Area	Area	Area
_QC00							628452	1.54762e+06	3.17771e+07	1.15795e+06	2.54111e+06	607753	775014	1.61757e+06	193960	1.58318e+08	1.12374e+08	3.0528e+06	4.35173e+07	1.01951e+06	2.05702e+07	1.04685e+06	1.17811e+07	9.45596e+07	8.73298e+07	1.9832e+06	1.90776e+06	1.19395e+08	6.01961e+08	2.7874e+06	4.53726e+06	1.75567e+08	2.41578e+06	7.97219e+06	6.05008e+08	1.72567e+08	1.01255e+07	1.95697e+07	5.30973e+07	5.33584e+06	2.26159e+06	8.51103e+07	8.7236e+06	2.99923e+08	2.09244e+08	5.8588e+06	4.38141e+08	6.58438e+08	1.66771e+06
_QC01							581912	1.28267e+06	3.26418e+07	1.06441e+06	2.46861e+06	571565	737326	1.6124e+06	190836	1.4882e+08	1.19243e+08	3.06536e+06	2.65996e+07	1.0277e+06	2.15644e+07	1.17012e+06	1.10498e+07	9.35417e+07	7.87966e+07	1.92049e+06	1.77347e+06	1.24292e+08	6.85295e+08	2.56694e+06	4.29992e+06	1.74837e+08	1.95978e+06	7.62864e+06	5.52911e+08	1.62067e+08	1.32703e+07	1.87629e+07	4.80704e+07	4.26655e+06	2.04903e+06	7.77809e+07	7.01022e+06	2.79451e+08	2.02832e+08	5.55435e+06	3.81367e+08	6.79384e+08	1.54315e+06
_QC02							678319	1.35555e+06	3.48021e+07	1.19536e+06	2.70741e+06	678522	909138	1.71945e+06	204943	1.65804e+08	1.15262e+08	3.20927e+06	3.16299e+07	1.13989e+06	1.93799e+07	1.1724e+06	1.28787e+07	9.69181e+07	8.59116e+07	2.11727e+06	1.94849e+06	1.13651e+08	6.38391e+08	3.0197e+06	4.79632e+06	1.80862e+08	2.41543e+06	8.42828e+06	5.82434e+08	1.68121e+08	1.42465e+07	1.37875e+07	5.80126e+07	6.5027e+06	2.31997e+06	8.70665e+07	7.60432e+06	3.11789e+08	2.14575e+08	6.42203e+06	3.93868e+08	7.22534e+08	1.75542e+06
_QC03							699229	1.23102e+06	3.44836e+07	1.13823e+06	2.75082e+06	747141	868953	1.67426e+06	184728	1.63616e+08	1.26302e+08	3.1738e+06	3.06992e+07	1.15243e+06	2.1708e+07	950413	1.24224e+07	9.99214e+07	8.90401e+07	2.16184e+06	2.03233e+06	1.27811e+08	7.14916e+08	2.74219e+06	4.92306e+06	1.79001e+08	2.3248e+06	8.33028e+06	5.79907e+08	1.7813e+08	1.44539e+07	1.96072e+07	5.60247e+07	5.3232e+06	2.16096e+06	8.70551e+07	7.31499e+06	3.17027e+08	2.16606e+08	5.8813e+06	3.93851e+08	6.94627e+08	1.54946e+06
_QC04							678303	1.61083e+06	3.58932e+07	1.10618e+06	3.10267e+06	795064	995090	1.67247e+06	210839	1.7255e+08	1.25599e+08	3.11531e+06	3.06243e+07	947827	2.19558e+07	998508	1.30814e+07	1.09392e+08	8.96167e+07	2.26032e+06	1.99624e+06	1.24813e+08	7.4792e+08	3.05321e+06	5.38656e+06	1.85043e+08	2.41933e+06	8.44918e+06	5.93164e+08	1.84402e+08	1.48313e+07	1.87487e+07	6.18746e+07	5.92955e+06	2.46528e+06	9.75609e+07	7.32855e+06	3.14331e+08	2.31192e+08	6.16498e+06	4.09393e+08	7.99722e+08	1.60607e+06
_QC05							651232	1.25042e+06	3.30389e+07	1.01294e+06	2.92164e+06	727015	919634	1.79963e+06	201085	1.58014e+08	1.29883e+08	3.22023e+06	2.93573e+07	804113	2.17559e+07	954784	1.20911e+07	1.07215e+08	9.07345e+07	2.16263e+06	1.70566e+06	1.32448e+08	7.69187e+08	2.93518e+06	5.0614e+06	1.78204e+08	2.34754e+06	8.11164e+06	5.68436e+08	1.74069e+08	1.52128e+07	2.07706e+07	5.53217e+07	4.86867e+06	2.32525e+06	8.99419e+07	7.02106e+06	3.09569e+08	2.22386e+08	5.8753e+06	3.96165e+08	7.20395e+08	1.67708e+06
_QC06							680183	1.49994e+06	3.40583e+07	1.18243e+06	3.14277e+06	802244	1.02779e+06	1.7839e+06	191579	1.67235e+08	1.23884e+08	3.38438e+06	3.13944e+07	1.02579e+06	2.11969e+07	1.01028e+06	1.31969e+07	1.11062e+08	8.88609e+07	2.19498e+06	2.0275e+06	1.30879e+08	7.71268e+08	3.06879e+06	5.28243e+06	1.95976e+08	2.40729e+06	8.71954e+06	5.72281e+08	1.81199e+08	1.24978e+07	1.75384e+07	6.02225e+07	5.91716e+06	2.37962e+06	9.98457e+07	7.24276e+06	3.2843e+08	2.27545e+08	6.31743e+06	4.13266e+08	7.6976e+08	1.5287e+06
_QC07							616870	1.14168e+06	3.26855e+07	1.03385e+06	3.12124e+06	727649	995471	1.67408e+06	192773	1.57377e+08	1.27046e+08	3.16741e+06	2.85352e+07	1.03265e+06	2.22106e+07	805534	1.1402e+07	1.05683e+08	8.88111e+07	2.11986e+06	1.83294e+06	1.34298e+08	7.49482e+08	2.82086e+06	5.10315e+06	1.81583e+08	2.34558e+06	8.30559e+06	5.49274e+08	1.67891e+08	1.41193e+07	2.02729e+07	5.63435e+07	4.88722e+06	2.40655e+06	9.05976e+07	6.81716e+06	3.10754e+08	2.07785e+08	5.83018e+06	3.92001e+08	7.49878e+08	1.49886e+06
_QC08							633613	1.01345e+06	3.54458e+07	1.03863e+06	2.92416e+06	781932	945496	1.80499e+06	211386	1.73108e+08	1.2435e+08	3.23346e+06	3.01664e+07	1.14824e+06	2.20755e+07	987994	1.30048e+07	1.08768e+08	9.1492e+07	2.33074e+06	2.05439e+06	1.30707e+08	8.10747e+08	3.10809e+06	5.08405e+06	1.88784e+08	2.37059e+06	8.92997e+06	5.62351e+08	1.86664e+08	1.86075e+07	1.82532e+07	6.07619e+07	6.15835e+06	2.64545e+06	9.23286e+07	7.35628e+06	3.30455e+08	2.32462e+08	6.42432e+06	4.21479e+08	7.95632e+08	1.54717e+06
_QC09							622253	1.50013e+06	3.35623e+07	1.08696e+06	2.7378e+06	775638	926544	1.77898e+06	191199	1.65454e+08	1.36902e+08	3.2807e+06	2.8927e+07	960198	2.24521e+07	843006	1.24404e+07	1.05556e+08	8.27275e+07	2.11787e+06	1.96486e+06	1.33113e+08	7.777e+08	2.92927e+06	5.01101e+06	1.8166e+08	2.26597e+06	8.0949e+06	5.70537e+08	1.8198e+08	1.21062e+07	1.9929e+07	5.53206e+07	5.61242e+06	2.25922e+06	9.34005e+07	7.27833e+06	3.1205e+08	2.18457e+08	6.25477e+06	4.07536e+08	7.12363e+08	1.56838e+06
_QC10							626243	1.17931e+06	3.62795e+07	1.23492e+06	2.83025e+06	771546	994958	1.74193e+06	211245	1.73621e+08	1.27277e+08	3.43876e+06	3.00941e+07	1.11532e+06	2.11726e+07	1.16057e+06	1.31026e+07	1.02646e+08	8.75413e+07	2.04899e+06	2.06246e+06	1.26271e+08	6.74514e+08	3.0377e+06	4.84226e+06	1.94507e+08	2.38577e+06	8.36309e+06	5.6905e+08	1.77161e+08	1.31327e+07	1.77275e+07	5.81934e+07	6.03451e+06	2.53165e+06	8.97438e+07	7.26113e+06	3.26731e+08	2.27808e+08	6.4801e+06	4.12555e+08	7.83306e+08	1.63661e+06
_QC11							625117	1.09766e+06	3.6679e+07	1.10858e+06	3.00298e+06	930049	922375	1.76949e+06	202270	1.81285e+08	1.45957e+08	3.38255e+06	3.16784e+07	1.14646e+06	2.13217e+07	998282	1.34409e+07	1.11678e+08	9.5385e+07	2.38942e+06	1.90316e+06	1.26757e+08	7.34916e+08	2.99276e+06	5.14989e+06	1.88909e+08	2.13709e+06	8.40529e+06	5.95253e+08	1.73307e+08	1.10691e+07	1.80529e+07	6.04361e+07	6.1641e+06	2.42146e+06	9.3834e+07	7.44919e+06	3.20519e+08	2.28303e+08	6.13986e+06	4.2293e+08	7.67533e+08	1.56692e+06
_QC12							607987	1.57957e+06	3.63956e+07	1.05701e+06	2.78433e+06	784682	864258	1.65662e+06	189549	1.71554e+08	1.33145e+08	2.9171e+06	3.07724e+07	1.0822e+06	2.14713e+07	949198	1.31995e+07	1.03746e+08	8.9225e+07	2.3074e+06	2.00693e+06	1.30307e+08	7.3137e+08	2.97742e+06	4.70477e+06	1.84673e+08	2.28362e+06	8.10495e+06	5.72001e+08	1.77708e+08	1.1581e+07	1.90303e+07	5.45596e+07	5.73599e+06	2.45612e+06	8.57452e+07	7.32852e+06	3.22145e+08	2.25488e+08	5.87619e+06	4.01073e+08	6.9619e+08	1.59621e+06
_QC13							633552	1.55427e+06	3.47424e+07	1.07819e+06	2.57734e+06	759430	878112	1.76405e+06	197432	1.63047e+08	1.26778e+08	3.34229e+06	2.95892e+07	1.04768e+06	2.24236e+07	1.05949e+06	1.19284e+07	1.06781e+08	8.98141e+07	2.33117e+06	1.94944e+06	1.27667e+08	7.62107e+08	2.82115e+06	4.84464e+06	1.83658e+08	2.3095e+06	8.54733e+06	5.6488e+08	1.71772e+08	1.66751e+07	1.96946e+07	5.69676e+07	6.11031e+06	2.44102e+06	9.04237e+07	7.00257e+06	3.1993e+08	2.17883e+08	5.97226e+06	4.04448e+08	7.76658e+08	1.63354e+06
_QC14							778489	1.46644e+06	3.35043e+07	1.02757e+06	3.25163e+06	769028	990661	1.74838e+06	203237	1.60312e+08	1.25547e+08	3.10832e+06	3.00929e+07	1.73174e+06	2.22953e+07	951417	2.19158e+07	9.90091e+07	9.18441e+07	2.06506e+06	1.8848e+06	1.27442e+08	7.19996e+08	2.63517e+06	7.07058e+06	1.92335e+08	2.62105e+06	7.97441e+06	5.33051e+08	1.79967e+08	1.19072e+07	2.07764e+07	5.85157e+07	5.93236e+06	2.26975e+06	8.65173e+07	7.02907e+06	3.2359e+08	2.65297e+08	5.98073e+06	3.91229e+08	8.25332e+08	1.5285e+06
_QC15							614932	1.44393e+06	3.36184e+07	1.10154e+06	2.64879e+06	709420	911109	1.72316e+06	188894	1.67789e+08	1.18059e+08	3.20222e+06	2.94717e+07	1.0137e+06	2.034e+07	1.20829e+06	1.18648e+07	9.86899e+07	8.75724e+07	2.11654e+06	2.09146e+06	1.23494e+08	7.09265e+08	3.0095e+06	4.67552e+06	1.80848e+08	2.29705e+06	8.48494e+06	5.95509e+08	1.68352e+08	1.28561e+07	1.70719e+07	5.71713e+07	5.88796e+06	2.24746e+06	9.26626e+07	7.00154e+06	3.1234e+08	2.07093e+08	6.12078e+06	4.01589e+08	7.50986e+08	1.6783e+06
_QC16							595911	1.10053e+06	3.29706e+07	1.14628e+06	2.55967e+06	681521	871638	1.68231e+06	184230	1.58754e+08	1.25122e+08	3.05281e+06	2.97528e+07	876039	2.20345e+07	1.01072e+06	1.10889e+07	9.69589e+07	8.68559e+07	2.03708e+06	1.97873e+06	1.28212e+08	6.92078e+08	2.80288e+06	4.53917e+06	1.71558e+08	2.33916e+06	8.21352e+06	5.68882e+08	1.64235e+08	1.31756e+07	1.94721e+07	5.27001e+07	4.87871e+06	2.16619e+06	9.16881e+07	6.92276e+06	3.00514e+08	2.10376e+08	6.16612e+06	3.85268e+08	6.84491e+08	1.57621e+06
_QC17							671721	1.51037e+06	3.36026e+07	1.03374e+06	2.52838e+06	782984	911424	1.74867e+06	192566	1.60923e+08	1.22121e+08	3.21902e+06	2.92865e+07	960997	2.08207e+07	1.01571e+06	1.17799e+07	1.00122e+08	8.79108e+07	2.10816e+06	1.89192e+06	1.21139e+08	6.95866e+08	2.77725e+06	4.6672e+06	1.79787e+08	2.34004e+06	8.27592e+06	5.85682e+08	1.76748e+08	1.30149e+07	1.6932e+07	5.53554e+07	5.68937e+06	2.40022e+06	9.1968e+07	7.20055e+06	3.04625e+08	2.11536e+08	6.07701e+06	4.01113e+08	7.60344e+08	1.62258e+06
_QC18							628569	1.29003e+06	3.51958e+07	1.1032e+06	2.89565e+06	688960	892282	1.66944e+06	198230	1.6773e+08	1.13994e+08	2.99628e+06	2.93378e+07	1.05058e+06	2.1362e+07	972563	1.18596e+07	1.03723e+08	8.21787e+07	2.14109e+06	1.82748e+06	1.24068e+08	7.24497e+08	2.93391e+06	4.55374e+06	1.81602e+08	2.35038e+06	8.11828e+06	5.84604e+08	1.73625e+08	1.48743e+07	1.82484e+07	5.53494e+07	5.60611e+06	2.24427e+06	8.44968e+07	7.02431e+06	3.04615e+08	2.15137e+08	5.84622e+06	3.84897e+08	6.93502e+08	1.61391e+06
_QC19							665800	1.50925e+06	3.24689e+07	1.23062e+06	2.89098e+06	730728	864318	1.67016e+06	196640	1.54692e+08	1.21933e+08	3.19987e+06	2.91026e+07	917092	2.11783e+07	1.03618e+06	1.09322e+07	1.00966e+08	8.68346e+07	2.00465e+06	1.82874e+06	1.24387e+08	6.64431e+08	2.90279e+06	4.60026e+06	1.77031e+08	2.2183e+06	7.96399e+06	5.95579e+08	1.69006e+08	1.27272e+07	1.84638e+07	5.64723e+07	5.00812e+06	2.31378e+06	8.59322e+07	7.37813e+06	2.97301e+08	2.1185e+08	5.98795e+06	3.95304e+08	7.1293e+08	1.50801e+06
_QC20							650960	1.20072e+06	3.32855e+07	1.13499e+06	2.92072e+06	600606	847492	1.6302e+06	209729	1.59363e+08	1.21394e+08	3.2813e+06	4.25218e+07	991207	2.03756e+07	1.10089e+06	1.13025e+07	1.03186e+08	8.61168e+07	2.12465e+06	1.93409e+06	1.24535e+08	6.99415e+08	2.90001e+06	5.08916e+06	1.8315e+08	2.26622e+06	8.38274e+06	5.66409e+08	1.82032e+08	1.49452e+07	1.84026e+07	5.57844e+07	5.1393e+06	2.24872e+06	8.70832e+07	9.10547e+06	3.11643e+08	2.11943e+08	5.96261e+06	4.44914e+08	6.75385e+08	1.72891e+06
_QC21							656394	1.47295e+06	3.53813e+07	1.19728e+06	2.63309e+06	691318	874955	1.7812e+06	210645	1.66278e+08	1.1994e+08	3.22892e+06	4.63863e+07	1.09808e+06	2.12843e+07	1.17647e+06	1.37679e+07	1.05566e+08	9.08177e+07	2.24214e+06	2.23248e+06	1.22992e+08	7.43104e+08	2.99072e+06	5.64045e+06	1.89396e+08	2.39344e+06	8.42635e+06	6.05887e+08	1.81512e+08	1.38971e+07	1.73663e+07	5.7204e+07	5.91268e+06	2.42973e+06	8.94304e+07	8.82689e+06	3.23113e+08	2.30057e+08	6.16968e+06	4.55376e+08	7.31408e+08	1.64392e+06
_QC22							631429	1.32942e+06	3.18254e+07	1.10509e+06	2.50028e+06	705947	923892	1.6034e+06	190099	1.55724e+08	1.20249e+08	3.00233e+06	2.77025e+07	894513	2.17531e+07	1.0071e+06	1.1382e+07	9.83448e+07	8.57667e+07	2.15828e+06	1.76296e+06	1.29867e+08	7.51493e+08	2.85914e+06	4.90641e+06	1.73396e+08	2.3139e+06	8.07858e+06	5.63474e+08	1.6471e+08	1.15501e+07	2.05664e+07	5.39309e+07	4.90235e+06	2.33918e+06	8.36826e+07	6.82251e+06	3.01587e+08	2.11935e+08	5.93182e+06	3.90319e+08	6.87288e+08	1.53916e+06
_QC23							678537	1.53419e+06	3.56881e+07	1.18473e+06	3.2421e+06	786433	887584	1.65899e+06	193367	1.72056e+08	1.14577e+08	3.34115e+06	2.90012e+07	1.12065e+06	2.11798e+07	1.15085e+06	1.26271e+07	1.04694e+08	9.01224e+07	2.11238e+06	1.92691e+06	1.26764e+08	7.10949e+08	2.92206e+06	5.17496e+06	1.8778e+08	2.33582e+06	8.57586e+06	6.18364e+08	1.81559e+08	1.48397e+07	1.70838e+07	6.00577e+07	5.78709e+06	2.34873e+06	9.50989e+07	7.37793e+06	3.18673e+08	2.32509e+08	6.13403e+06	4.20074e+08	7.82813e+08	1.66105e+06
_QC24							639703	1.25884e+06	3.30828e+07	996502	3.00473e+06	723920	899256	1.71944e+06	206405	1.58067e+08	1.30939e+08	3.30336e+06	2.78448e+07	1.01315e+06	2.16916e+07	860801	1.19611e+07	1.02994e+08	8.75895e+07	1.99725e+06	1.8955e+06	1.23249e+08	5.6855e+08	2.86206e+06	4.80105e+06	1.75156e+08	2.30897e+06	8.01404e+06	5.60685e+08	1.69379e+08	1.50724e+07	1.95839e+07	5.54622e+07	5.2579e+06	2.37096e+06	8.69765e+07	7.17821e+06	3.06307e+08	2.14844e+08	5.98012e+06	3.93498e+08	7.39165e+08	1.65011e+06
_QC25							609017	1.27384e+06	3.33803e+07	1.12487e+06	3.25628e+06	785986	907457	1.81727e+06	200395	1.60791e+08	1.23623e+08	3.31678e+06	3.02238e+07	1.01979e+06	2.04023e+07	993332	1.2458e+07	1.04336e+08	8.82981e+07	2.08666e+06	1.7884e+06	1.23761e+08	7.4766e+08	2.93191e+06	4.62003e+06	1.89678e+08	2.31726e+06	8.35908e+06	5.20436e+08	1.75541e+08	1.36965e+07	1.7933e+07	5.73172e+07	6.04892e+06	2.395e+06	9.20816e+07	7.12691e+06	3.15013e+08	2.15392e+08	6.03824e+06	3.89088e+08	7.28549e+08	1.55527e+06
_QC26							646606	1.36291e+06	3.36359e+07	1.04466e+06	2.54473e+06	760451	971167	1.75352e+06	190003	1.69335e+08	1.50057e+08	3.13034e+06	2.87469e+07	1.12545e+06	2.20417e+07	997568	1.3644e+07	1.02505e+08	8.48785e+07	2.23195e+06	2.0164e+06	1.27254e+08	7.4955e+08	2.79181e+06	4.78067e+06	1.82999e+08	2.37241e+06	8.39274e+06	5.73046e+08	1.78132e+08	1.32495e+07	1.91518e+07	5.73181e+07	5.57926e+06	2.19342e+06	9.32817e+07	7.06171e+06	3.03782e+08	2.12903e+08	6.01619e+06	3.91175e+08	7.21885e+08	1.56304e+06
_QC27							643326	1.07769e+06	3.44474e+07	1.03608e+06	2.65175e+06	725282	941091	1.63496e+06	180240	1.65028e+08	1.32018e+08	3.02912e+06	2.85931e+07	1.13842e+06	2.15218e+07	940872	1.283e+07	1.03261e+08	8.69577e+07	2.1895e+06	1.79248e+06	1.29931e+08	7.21756e+08	2.87612e+06	4.8262e+06	1.81892e+08	2.13944e+06	7.955e+06	5.93929e+08	1.74236e+08	1.50114e+07	1.96581e+07	5.49797e+07	5.23421e+06	2.2745e+06	8.61962e+07	7.02101e+06	3.10508e+08	2.18957e+08	6.16133e+06	3.83305e+08	7.43878e+08	1.56513e+06
_QC28							666061	1.31928e+06	3.81188e+07	1.10801e+06	2.48359e+06	708194	861423	1.63945e+06	193799	1.70012e+08	1.16958e+08	3.03898e+06	2.71751e+07	1.15835e+06	2.11564e+07	858692	1.35613e+07	1.01454e+08	8.54874e+07	2.22879e+06	2.04953e+06	1.2848e+08	7.59156e+08	2.98003e+06	4.80518e+06	1.81252e+08	2.29264e+06	8.34915e+06	5.36531e+08	1.78058e+08	1.17944e+07	1.70889e+07	5.50601e+07	6.00986e+06	2.20737e+06	8.8286e+07	7.09379e+06	3.14701e+08	2.12754e+08	6.02169e+06	3.91281e+08	7.42791e+08	1.59782e+06
_QC29							657919	1.22302e+06	3.37337e+07	1.07041e+06	2.81182e+06	721272	900643	1.77289e+06	206483	1.70287e+08	1.21387e+08	3.12816e+06	2.83725e+07	1.07474e+06	2.12392e+07	923799	1.25446e+07	1.00492e+08	8.65934e+07	2.03979e+06	1.9271e+06	1.2593e+08	7.42667e+08	2.75956e+06	4.76237e+06	1.80944e+08	2.33477e+06	8.23421e+06	5.49337e+08	1.66484e+08	1.31919e+07	1.92284e+07	5.5368e+07	5.73205e+06	2.37394e+06	9.2149e+07	7.03715e+06	3.15811e+08	2.22276e+08	6.03278e+06	3.96857e+08	7.59159e+08	1.54479e+06
_QC30							651636	1.44533e+06	3.3496e+07	1.1679e+06	2.93016e+06	717514	931199	1.88529e+06	200011	1.62533e+08	1.24291e+08	3.30691e+06	2.98963e+07	1.06696e+06	2.27314e+07	1.15868e+06	1.23478e+07	1.05651e+08	9.05966e+07	2.21571e+06	1.9276e+06	1.30598e+08	7.16972e+08	2.94691e+06	5.0163e+06	1.86594e+08	2.48193e+06	8.28633e+06	6.08317e+08	1.7383e+08	1.13181e+07	1.86465e+07	5.54051e+07	5.6532e+06	2.22009e+06	8.94804e+07	7.11969e+06	3.19333e+08	2.20862e+08	6.11396e+06	3.96763e+08	7.06919e+08	1.66848e+06
_QC31							597193	1.4075e+06	3.28339e+07	1.10588e+06	3.17279e+06	761253	890486	1.64139e+06	203867	1.56551e+08	1.20289e+08	3.2219e+06	2.76835e+07	942099	2.05011e+07	1.0179e+06	1.21448e+07	1.00402e+08	8.63192e+07	2.22084e+06	1.90048e+06	1.31071e+08	7.41855e+08	2.84318e+06	4.52094e+06	1.86097e+08	2.29157e+06	8.32429e+06	5.52467e+08	1.81354e+08	1.27829e+07	1.90626e+07	5.90301e+07	5.09255e+06	2.25046e+06	9.08788e+07	6.89409e+06	3.08629e+08	2.17034e+08	6.03048e+06	3.91753e+08	7.67535e+08	1.58178e+06
_QC32							634500	1.47639e+06	3.349e+07	1.07085e+06	2.61708e+06	753093	907027	1.65248e+06	190937	1.63184e+08	1.26789e+08	3.309e+06	2.88935e+07	982607	2.22482e+07	1.0385e+06	1.22119e+07	1.01497e+08	8.86589e+07	1.93899e+06	1.85194e+06	1.30135e+08	7.67851e+08	2.93669e+06	4.49726e+06	1.82358e+08	2.34448e+06	8.13077e+06	5.52501e+08	1.71511e+08	1.57774e+07	1.93656e+07	5.53093e+07	5.48894e+06	2.41502e+06	8.74288e+07	7.35278e+06	3.07816e+08	2.21551e+08	6.04142e+06	3.92308e+08	7.23716e+08	1.67802e+06
_QC33							687917	1.38242e+06	3.4825e+07	1.19612e+06	2.87826e+06	718020	897825	1.68981e+06	201181	1.65513e+08	1.22236e+08	3.14649e+06	4.38003e+07	1.10418e+06	2.06133e+07	1.12386e+06	1.30777e+07	1.06191e+08	8.98319e+07	2.22402e+06	2.06397e+06	1.14012e+08	6.11504e+08	2.95234e+06	6.19349e+06	1.79392e+08	2.2957e+06	8.4672e+06	6.35412e+08	1.76242e+08	1.45225e+07	1.73862e+07	5.8119e+07	5.73067e+06	2.52442e+06	8.93313e+07	8.66975e+06	3.14354e+08	2.2647e+08	6.06716e+06	4.65398e+08	7.17721e+08	1.57109e+06
CS25034	264 B1 d14	untreated d14	264	OvC8			731018	5.98788e+06	1.7647e+07	664732	5.12402e+06	3.08132e+06	894037	1.59248e+06	198350	1.74717e+08	9.8605e+07	2.82902e+06	1.49246e+07	878982	1.74633e+07	2.17346e+06	1.22553e+07	9.65612e+07	7.63029e+07	2.89277e+06	1.87095e+06	1.23333e+08	6.66281e+08	2.54823e+06	1.7434e+06	1.72505e+08	2.10136e+06	1.21288e+07	5.81439e+08	1.67806e+08	1.71488e+07	1.83432e+07	5.88518e+07	6.9969e+06	1.63629e+06	7.99062e+07	7.38736e+06	3.11033e+08	2.95451e+08	5.94822e+06	3.70818e+08	6.4696e+08	1.92003e+06
CS25035	264 B2 d14	untreated d14	264	OvC8			1.02692e+06	6.37971e+06	1.60291e+07	836370	4.85712e+06	3.15019e+06	1.091e+06	1.79703e+06	197044	1.57488e+08	9.85105e+07	2.62505e+06	1.46099e+07	857418	1.84238e+07	2.51304e+06	1.16762e+07	8.89533e+07	7.18639e+07	2.66584e+06	1.82811e+06	1.16327e+08	6.45817e+08	2.26554e+06	2.80509e+06	1.67172e+08	2.21241e+06	1.15014e+07	6.25935e+08	1.56962e+08	1.492e+07	1.74255e+07	5.75905e+07	6.33288e+06	2.26296e+06	7.10304e+07	6.77577e+06	2.97167e+08	2.91655e+08	5.46339e+06	3.49674e+08	6.24987e+08	1.81686e+06
CS25036	264 B1 d21	untreated d21	264	OvC8			465793	4.09793e+06	2.61248e+07	828707	3.88529e+06	1.09199e+06	754937	1.63574e+06	219930	1.80977e+08	1.05631e+08	3.33795e+06	2.68042e+07	903410	1.64571e+07	1.97017e+06	1.12894e+07	9.94687e+07	8.29622e+07	2.48897e+06	2.05071e+06	1.12451e+08	7.35442e+08	3.13042e+06	2.80569e+06	1.87665e+08	2.32169e+06	1.13317e+07	5.58442e+08	1.81029e+08	1.32515e+07	1.62205e+07	6.40369e+07	5.33479e+06	797344	8.27989e+07	7.59472e+06	3.35166e+08	2.89668e+08	7.10557e+06	4.18952e+08	7.09154e+08	1.82268e+06
CS25037	264 B2 d21	untreated d21	264	OvC8			623605	4.16572e+06	2.46023e+07	1.26992e+06	4.17806e+06	1.34149e+06	859162	1.51333e+06	195867	1.67979e+08	1.06054e+08	3.2021e+06	2.62938e+07	879571	1.57571e+07	1.70849e+06	1.06586e+07	8.98147e+07	7.53896e+07	2.1757e+06	2.02032e+06	1.11894e+08	6.10394e+08	2.84388e+06	3.68419e+06	1.77853e+08	2.505e+06	1.36296e+07	6.84395e+08	1.64118e+08	1.51984e+07	1.60917e+07	6.0777e+07	5.16884e+06	930632	7.31379e+07	6.76672e+06	3.09442e+08	2.80368e+08	6.63494e+06	3.78431e+08	6.20561e+08	1.73415e+06
CS25038	264 C1 d14	carboplatin d14	264	OvC8			604203	4.49978e+06	1.82385e+07	438536	3.3807e+06	1.6193e+06	727729	1.81734e+06	194370	1.80915e+08	9.96132e+07	2.73152e+06	1.55681e+07	736544	1.82568e+07	1.39595e+06	1.30709e+07	9.75889e+07	7.58868e+07	2.45779e+06	1.71424e+06	1.36949e+08	7.57972e+08	2.3613e+06	2.25523e+06	1.72555e+08	2.38932e+06	5.9741e+06	3.72214e+08	1.6803e+08	1.6073e+07	1.68815e+07	5.12736e+07	5.42215e+06	2.44269e+06	7.90252e+07	7.38942e+06	2.98924e+08	2.64315e+08	5.9966e+06	3.72172e+08	6.36192e+08	1.81928e+06
CS25039	264 C2 d14	carboplatin d14	264	OvC8			553083	5.41412e+06	1.70811e+07	535118	3.27149e+06	2.07331e+06	741219	1.52737e+06	200019	1.6392e+08	8.91142e+07	2.6795e+06	1.4368e+07	784576	1.7194e+07	813082	1.27635e+07	9.50565e+07	7.26719e+07	2.6361e+06	1.72019e+06	1.24776e+08	6.86571e+08	2.27592e+06	3.71479e+06	1.66403e+08	1.99367e+06	7.04099e+06	4.60415e+08	1.62387e+08	1.41107e+07	1.48586e+07	4.9178e+07	5.47334e+06	2.78654e+06	8.03191e+07	6.55198e+06	2.86469e+08	2.26423e+08	5.77508e+06	3.62379e+08	6.09773e+08	1.72559e+06
CS25040	264 C1 d21	carboplatin d21	264	OvC8			204041	1.4116e+06	2.45527e+07	244123	1.60339e+06	460738	443516	1.56339e+06	204750	1.72123e+08	9.98251e+07	3.447e+06	3.01483e+07	896465	1.63974e+07	696678	1.13163e+07	1.01564e+08	8.06058e+07	2.71607e+06	2.02263e+06	1.45242e+08	8.14919e+08	3.23024e+06	2.36343e+06	1.88257e+08	2.36684e+06	6.2281e+06	2.97252e+08	1.83425e+08	1.81882e+07	1.42673e+07	5.68618e+07	4.06531e+06	478731	9.48524e+07	7.27211e+06	3.20309e+08	1.85289e+08	6.86717e+06	4.34384e+08	7.39845e+08	1.79688e+06
CS25041	264 C2 d21	carboplatin d21	264	OvC8			149077	1.36341e+06	2.138e+07	165227	510025	220815	386376	1.35107e+06	196279	1.55732e+08	9.78779e+07	3.02416e+06	2.77068e+07	745956	1.61872e+07	583041	9.59277e+06	8.74039e+07	7.59144e+07	2.71872e+06	1.82006e+06	1.51076e+08	7.98161e+08	2.88669e+06	2.01682e+06	1.78402e+08	1.64132e+06	3.21542e+06	2.53018e+08	1.65116e+08	1.17983e+07	1.60572e+07	5.2863e+07	3.66916e+06	601511	9.35923e+07	6.58303e+06	2.8839e+08	1.26357e+08	6.18219e+06	4.02738e+08	6.77111e+08	1.76297e+06
CS25042	264 D1 d14	paclitaxel d14	264	OvC8			733683	7.30501e+06	1.7932e+07	831475	4.94099e+06	2.27342e+06	831376	1.72101e+06	192089	1.73006e+08	1.00946e+08	2.77133e+06	1.43977e+07	851883	1.85684e+07	1.47649e+06	1.28611e+07	9.69485e+07	7.79214e+07	2.58765e+06	1.71703e+06	1.2603e+08	6.79218e+08	2.44357e+06	1.71109e+06	1.71794e+08	1.88217e+06	1.59084e+07	5.56641e+08	1.6338e+08	1.62667e+07	2.01988e+07	5.98798e+07	7.22936e+06	2.26283e+06	8.08933e+07	7.03442e+06	2.99504e+08	3.10362e+08	6.19936e+06	3.58891e+08	6.54493e+08	1.79178e+06
CS25043	264 D2 d14	paclitaxel d14	264	OvC8			629998	6.75732e+06	1.71172e+07	487342	4.32948e+06	1.28315e+06	819912	1.47993e+06	200279	1.61468e+08	9.50109e+07	2.81157e+06	1.4659e+07	917644	1.90811e+07	1.00456e+06	1.2566e+07	9.49537e+07	7.28724e+07	2.16207e+06	2.03033e+06	1.2678e+08	6.6715e+08	2.33711e+06	1.29437e+06	1.68877e+08	1.62033e+06	1.12896e+07	5.80151e+08	1.55271e+08	1.15426e+07	1.62632e+07	5.46922e+07	6.57332e+06	2.1323e+06	8.17835e+07	6.58021e+06	2.88284e+08	2.24151e+08	6.12061e+06	3.69348e+08	6.64178e+08	1.74579e+06
CS25044	264 D1 d21	paclitaxel d21	264	OvC8			363081	4.00334e+06	2.57162e+07	758155	3.44322e+06	750104	671929	1.54127e+06	197229	1.72561e+08	1.04106e+08	3.28461e+06	2.72731e+07	859433	1.95232e+07	893165	1.09421e+07	9.28913e+07	7.93597e+07	2.3097e+06	1.94174e+06	1.27301e+08	7.09749e+08	2.93557e+06	2.35845e+06	1.77176e+08	1.90794e+06	2.03002e+07	5.10512e+08	1.71538e+08	1.63628e+07	1.50749e+07	6.04257e+07	5.07752e+06	626317	9.11383e+07	7.14566e+06	3.15211e+08	2.52752e+08	6.40525e+06	3.92188e+08	6.5227e+08	1.80035e+06
CS25045	264 D2 d21	paclitaxel d21	264	OvC8			395483	3.66744e+06	2.4758e+07	400790	2.94276e+06	446241	721232	1.44812e+06	199425	1.74914e+08	1.12981e+08	3.21648e+06	2.91995e+07	968941	2.30623e+07	254540	1.19394e+07	9.81773e+07	7.77246e+07	2.18757e+06	1.83392e+06	1.3017e+08	7.06794e+08	2.95149e+06	3.78504e+06	1.85285e+08	1.85599e+06	2.096e+07	6.79199e+08	1.79205e+08	1.53886e+07	1.79445e+07	6.05992e+07	5.0657e+06	1.19477e+06	9.27783e+07	6.93379e+06	3.09272e+08	1.89591e+08	6.73755e+06	4.1037e+08	6.08851e+08	1.61599e+06
CS25046	264 E1 d14	carboplatin + paclitaxel d14	264	OvC8			955363	9.21196e+06	2.03345e+07	1.30739e+06	6.5218e+06	2.87664e+06	1.12339e+06	2.05602e+06	199114	1.86834e+08	1.08778e+08	3.1027e+06	1.71527e+07	757226	2.40543e+07	1.63188e+06	1.27558e+07	1.05667e+08	8.6968e+07	2.09955e+06	2.19391e+06	1.2024e+08	6.96909e+08	2.8146e+06	3.51426e+06	2.00366e+08	2.15572e+06	1.54061e+07	8.03606e+08	1.79783e+08	1.40281e+07	2.22622e+07	6.28532e+07	5.35783e+06	2.84379e+06	8.45176e+07	7.94926e+06	3.49845e+08	3.4005e+08	7.11922e+06	4.04478e+08	7.08755e+08	2.12419e+06
CS25047	264 E2 d14	carboplatin + paclitaxel d14	264	OvC8			743744	7.68406e+06	1.75418e+07	803504	5.45813e+06	2.04678e+06	1.00154e+06	1.82475e+06	192363	1.60617e+08	1.02983e+08	2.69078e+06	1.44407e+07	731302	2.1346e+07	1.33856e+06	1.19803e+07	1.01498e+08	7.92098e+07	1.99873e+06	1.89907e+06	1.19602e+08	6.40688e+08	2.48797e+06	2.56888e+06	1.67192e+08	2.11192e+06	1.09442e+07	6.85685e+08	1.60479e+08	1.66871e+07	1.69183e+07	5.29921e+07	4.94217e+06	2.37915e+06	7.43011e+07	7.00833e+06	3.01342e+08	3.10585e+08	5.95069e+06	3.62087e+08	6.27639e+08	1.83451e+06
CS25048	264 E1 d21	carboplatin + paclitaxel d21	264	OvC8			350086	1.07795e+06	2.60006e+07	326518	1.58603e+06	469851	646170	1.6004e+06	184644	1.80268e+08	1.08049e+08	3.44895e+06	2.86857e+07	861156	2.17326e+07	791360	1.18258e+07	1.0204e+08	8.47189e+07	1.61068e+06	2.01176e+06	1.43125e+08	7.8329e+08	3.21266e+06	2.29389e+06	1.82005e+08	2.19014e+06	1.62892e+07	5.32092e+08	1.75952e+08	1.47458e+07	1.97191e+07	5.69598e+07	3.12889e+06	366355	8.9681e+07	7.48388e+06	3.26655e+08	2.45425e+08	7.04111e+06	4.25277e+08	6.7959e+08	1.76092e+06
CS25049	264 E2 d21	carboplatin + paclitaxel d21	264	OvC8			356077	1.63675e+06	2.44782e+07	347060	1.64481e+06	456766	574459	1.43814e+06	194886	1.73662e+08	8.54052e+07	2.92091e+06	2.524e+07	887385	1.83738e+07	783326	1.05271e+07	9.29605e+07	7.70654e+07	1.50342e+06	1.82525e+06	1.16058e+08	5.9051e+08	2.73751e+06	2.3374e+06	1.61329e+08	1.94821e+06	1.55974e+07	5.41551e+08	1.59584e+08	1.23254e+07	1.14946e+07	4.91773e+07	3.46488e+06	455324	7.85075e+07	6.73159e+06	2.81444e+08	2.21853e+08	5.95948e+06	3.67902e+08	5.83119e+08	1.63642e+06
CS25050	265 B1 d14	untreated d14	265	OvC5			875978	3.68269e+06	2.04351e+07	4.24512e+06	4.79832e+06	2.55607e+06	1.00123e+06	1.75656e+06	199536	2.03649e+08	9.38313e+07	2.92134e+06	1.40049e+07	945658	2.00413e+07	1.87221e+06	1.52452e+07	1.01372e+08	7.75859e+07	1.1983e+06	1.81377e+06	1.05122e+08	5.61336e+08	2.4695e+06	3.39399e+06	1.6948e+08	2.8579e+06	2.67291e+06	7.14917e+08	1.63288e+08	1.35592e+07	2.2393e+07	5.54416e+07	8.78454e+06	2.11028e+06	7.12083e+07	7.27045e+06	3.10284e+08	2.58326e+08	5.9641e+06	3.30187e+08	6.38249e+08	1.749e+06
CS25051	265 B2 d14	untreated d14	265	OvC5			934732	3.34271e+06	1.87637e+07	4.46563e+06	4.91094e+06	1.93963e+06	1.12305e+06	1.73783e+06	196688	1.73873e+08	1.02995e+08	2.69841e+06	1.28552e+07	854888	1.88854e+07	1.63979e+06	1.4867e+07	9.74492e+07	7.65713e+07	1.13559e+06	1.80258e+06	9.35667e+07	4.87382e+08	2.36815e+06	3.65142e+06	1.67822e+08	2.5841e+06	6.22894e+06	7.61828e+08	1.54267e+08	1.27591e+07	1.48209e+07	5.17446e+07	7.71493e+06	1.41834e+06	7.5872e+07	6.97017e+06	2.80635e+08	2.42845e+08	5.81426e+06	3.13892e+08	5.8353e+08	1.6366e+06
CS25052	265 B1 d21	untreated d21	265	OvC5			391339	3.74357e+06	2.85831e+07	4.98685e+06	5.30663e+06	1.10971e+06	791316	1.68324e+06	209168	2.15218e+08	1.06087e+08	3.41848e+06	2.54303e+07	1.06831e+06	1.77667e+07	1.16812e+06	1.38653e+07	1.08933e+08	8.36532e+07	1.47147e+06	1.98469e+06	1.12593e+08	6.38871e+08	2.917e+06	3.52965e+06	1.81923e+08	2.45199e+06	3.4769e+06	7.20399e+08	1.7088e+08	1.40074e+07	1.46646e+07	6.34677e+07	6.49557e+06	724373	9.44734e+07	7.41858e+06	3.24875e+08	2.29368e+08	6.73137e+06	3.63107e+08	6.69953e+08	1.71079e+06
CS25053	265 B2 d21	untreated d21	265	OvC5			457422	3.2261e+06	2.44488e+07	4.98771e+06	4.08711e+06	944030	821329	1.5078e+06	213530	1.69297e+08	1.02502e+08	3.23503e+06	2.48488e+07	927203	1.68846e+07	794679	1.17898e+07	9.66938e+07	7.59652e+07	1.41666e+06	2.02484e+06	9.63136e+07	5.17397e+08	2.73821e+06	4.89949e+06	1.70671e+08	2.52311e+06	9.31818e+06	7.44852e+08	1.5706e+08	1.08169e+07	1.38941e+07	5.59515e+07	5.13467e+06	480012	8.82034e+07	6.48458e+06	2.73146e+08	2.27174e+08	6.14106e+06	3.30812e+08	6.02674e+08	1.61498e+06
CS25054	265 C1 d14	carboplatin d14	265	OvC5			1.00221e+06	5.63932e+06	1.935e+07	5.28261e+06	6.63e+06	2.98032e+06	1.04668e+06	2.25886e+06	190788	1.91373e+08	1.0394e+08	2.96136e+06	1.73029e+07	716375	2.63359e+07	1.20938e+06	1.34099e+07	1.28809e+08	7.921e+07	874508	1.97608e+06	1.21072e+08	6.42128e+08	2.33584e+06	7.43621e+06	1.63531e+08	3.75447e+06	3.97689e+06	5.99175e+08	1.5464e+08	1.37934e+07	1.95935e+07	5.47539e+07	5.61928e+06	4.90096e+06	9.21654e+07	7.53839e+06	3.02999e+08	2.62557e+08	6.10234e+06	2.94634e+08	6.1218e+08	1.21878e+06
CS25055	265 C2 d14	carboplatin d14	265	OvC5			862358	5.1942e+06	1.60698e+07	3.70188e+06	8.71969e+06	2.5813e+06	982911	2.04607e+06	194861	1.63458e+08	1.00803e+08	2.56007e+06	1.60789e+07	699842	2.39795e+07	1.06915e+06	1.30728e+07	1.16581e+08	7.25e+07	965437	1.84169e+06	1.13022e+08	6.25324e+08	2.14727e+06	5.01033e+06	1.62263e+08	2.99074e+06	8.68861e+06	6.06274e+08	1.56523e+08	1.31325e+07	1.46519e+07	5.22716e+07	5.89507e+06	3.62299e+06	8.48602e+07	6.68735e+06	2.81086e+08	2.40319e+08	5.74859e+06	2.99471e+08	6.07993e+08	1.29742e+06
CS25056	265 C1 d21	carboplatin d21	265	OvC5			110232	489544	2.68114e+07	573685	791661	177211	439099	1.37675e+06	194147	1.74188e+08	1.09006e+08	3.24551e+06	2.75208e+07	853022	1.90666e+07	487250	1.22929e+07	1.03919e+08	8.30678e+07	1.99481e+06	1.86286e+06	1.49841e+08	8.8951e+08	3.06522e+06	2.17751e+06	1.89206e+08	1.95889e+06	2.30814e+06	2.16936e+08	1.69708e+08	1.4683e+07	1.90305e+07	5.70113e+07	3.75201e+06	431154	1.07057e+08	7.24255e+06	3.04321e+08	1.17625e+08	6.45871e+06	4.0409e+08	6.98635e+08	1.69159e+06
CS25057	265 C2 d21	carboplatin d21	265	OvC5			205620	843537	2.53184e+07	617758	1.214e+06	239424	497737	1.52553e+06	193976	1.70639e+08	1.01799e+08	3.08647e+06	2.51925e+07	978913	1.70294e+07	440036	1.20385e+07	9.55804e+07	7.55348e+07	2.01038e+06	1.82794e+06	1.46682e+08	8.28773e+08	2.94469e+06	1.83303e+06	1.82172e+08	2.14894e+06	7.0982e+06	2.92244e+08	1.64629e+08	1.57886e+07	6.34577e+06	5.42985e+07	3.94012e+06	691202	9.47934e+07	6.90296e+06	2.95519e+08	1.421e+08	6.22937e+06	3.83143e+08	6.66866e+08	1.68648e+06
CS25058	265 D1 d14	paclitaxel d14	265	OvC5			1.20609e+06	5.6445e+06	2.13492e+07	8.6741e+06	6.08315e+06	2.53557e+06	1.30779e+06	1.93753e+06	194267	1.93882e+08	1.13085e+08	2.89978e+06	1.58802e+07	827043	2.40566e+07	1.5688e+06	1.46059e+07	1.13791e+08	8.47916e+07	1.07834e+06	2.07825e+06	9.95998e+07	5.17477e+08	2.66702e+06	5.46594e+06	1.73826e+08	2.32484e+06	2.25504e+06	9.05263e+08	1.63005e+08	1.33915e+07	1.71102e+07	6.00479e+07	8.57323e+06	3.61541e+06	7.94514e+07	7.96901e+06	3.0756e+08	2.71008e+08	7.42997e+06	3.3367e+08	5.91816e+08	1.71781e+06
CS25059	265 D2 d14	paclitaxel d14	265	OvC5			1.3901e+06	8.00829e+06	2.00803e+07	8.54887e+06	8.28168e+06	2.54767e+06	1.36251e+06	2.0126e+06	202142	1.90746e+08	1.14979e+08	2.77886e+06	1.6014e+07	915096	2.48891e+07	1.79836e+06	1.37168e+07	1.15446e+08	7.78982e+07	1.04398e+06	2.10269e+06	9.75782e+07	5.1062e+08	2.5305e+06	8.43269e+06	1.61106e+08	2.64558e+06	9.32549e+06	9.11618e+08	1.51418e+08	1.56555e+07	1.8914e+07	5.97009e+07	7.10094e+06	4.05489e+06	6.24136e+07	7.47584e+06	2.9178e+08	3.08244e+08	6.96838e+06	2.83313e+08	6.38093e+08	1.18873e+06
CS25060	265 D1 d21	paclitaxel d21	265	OvC5			354513	2.63862e+06	2.90219e+07	4.75265e+06	4.5807e+06	675793	682713	1.58152e+06	191271	1.83716e+08	1.08685e+08	3.26633e+06	2.61049e+07	777096	2.35182e+07	765983	1.30708e+07	1.02207e+08	8.27432e+07	1.46224e+06	1.84185e+06	1.29026e+08	7.28028e+08	2.97022e+06	3.0905e+06	1.88891e+08	2.0139e+06	3.61665e+06	5.64508e+08	1.65917e+08	1.52786e+07	1.5897e+07	6.24989e+07	5.61316e+06	670499	9.53952e+07	7.40028e+06	3.05828e+08	1.94645e+08	6.77291e+06	3.8869e+08	6.66883e+08	1.73293e+06
CS25061	265 D2 d21	paclitaxel d21	265	OvC5			539300	5.41907e+06	2.57326e+07	5.20545e+06	5.49013e+06	737631	844707	1.60753e+06	198172	1.70612e+08	1.11959e+08	3.18097e+06	2.52875e+07	855593	2.20957e+07	750522	1.17945e+07	1.01644e+08	7.8966e+07	1.36732e+06	1.8749e+06	1.09876e+08	5.62587e+08	2.83073e+06	4.2982e+06	1.69468e+08	1.99162e+06	2.06851e+07	7.20473e+08	1.64655e+08	1.2387e+07	1.42502e+07	5.97492e+07	4.95906e+06	1.18173e+06	7.84989e+07	6.89723e+06	2.88169e+08	2.3129e+08	6.53008e+06	3.60607e+08	6.14848e+08	1.70062e+06
CS25062	265 E1 d14	carboplatin + paclitaxel d14	265	OvC5			228101	2.51171e+06	2.14288e+07	2.26092e+06	3.26093e+06	725243	514610	1.87247e+06	202284	2.11001e+08	1.00274e+08	2.92319e+06	2.03264e+07	633302	2.75298e+07	469730	1.62033e+07	1.31367e+08	8.1296e+07	2.0755e+06	1.97994e+06	1.6005e+08	9.43911e+08	2.744e+06	2.52103e+06	2.0532e+08	2.13541e+06	933296	3.78544e+08	1.89725e+08	1.52735e+07	2.24994e+07	6.00263e+07	6.75948e+06	690603	1.15751e+08	8.40942e+06	3.37493e+08	1.4247e+08	7.01388e+06	4.14182e+08	6.87606e+08	1.79569e+06
CS25063	265 E2 d14	carboplatin + paclitaxel d14	265	OvC5			149332	1.53065e+06	1.94067e+07	1.38498e+06	2.41343e+06	509066	415118	1.51196e+06	183809	1.91863e+08	9.06967e+07	2.69479e+06	1.77478e+07	687485	2.57103e+07	312065	1.44731e+07	1.13075e+08	7.50108e+07	2.25317e+06	1.85649e+06	1.55202e+08	6.31614e+08	2.4964e+06	2.4482e+06	1.91245e+08	1.80651e+06	668788	2.38617e+08	1.81813e+08	1.08814e+07	1.94212e+07	5.22823e+07	6.80051e+06	417735	1.04525e+08	6.97782e+06	3.00793e+08	1.00447e+08	6.22055e+06	3.85103e+08	6.86218e+08	1.63349e+06
CS25064	265 E1 d21	carboplatin + paclitaxel d21	265	OvC5			28117.5	219943	2.87739e+07	239676	339395	65558.2	286047	1.38558e+06	194680	1.98299e+08	1.07583e+08	3.49791e+06	3.19104e+07	969973	2.29452e+07	371847	1.34383e+07	1.06157e+08	8.63189e+07	3.00813e+06	1.99632e+06	1.67296e+08	1.01011e+09	3.23126e+06	1.73083e+06	2.22276e+08	1.9026e+06	340630	1.02473e+08	1.94987e+08	1.72276e+07	1.73584e+07	6.35162e+07	5.09581e+06	29012.8	1.1239e+08	8.13715e+06	3.47988e+08	7.27429e+07	6.85071e+06	4.64166e+08	8.4581e+08	1.83145e+06
CS25065	265 E2 d21	carboplatin + paclitaxel d21	265	OvC5			20438.2	98096.2	2.5564e+07	173897	168742	14854	250339	1.22614e+06	188910	1.75884e+08	9.73988e+07	3.18672e+06	2.91651e+07	882341	2.22623e+07	413112	1.23072e+07	9.5162e+07	7.54997e+07	3.02319e+06	1.86593e+06	1.58924e+08	8.99118e+08	2.86487e+06	1.61931e+06	1.86778e+08	1.74584e+06	498873	5.78874e+07	1.76158e+08	1.49103e+07	1.65532e+07	5.1892e+07	4.7244e+06	26849.2	1.01251e+08	6.9804e+06	3.02991e+08	5.97581e+07	6.35256e+06	4.1683e+08	6.7411e+08	1.64445e+06
CS25066	268 B1 d14	untreated d14	268	OvC1			746749	767668	2.79213e+07	84859	4.08125e+06	635216	972543	1.52919e+06	203158	1.90148e+08	1.18533e+08	2.97656e+06	2.61741e+07	1.04475e+06	1.78051e+07	3.14798e+06	1.06281e+07	8.96574e+07	7.63152e+07	2.18785e+06	2.00699e+06	1.12506e+08	5.92888e+08	2.66079e+06	3.20398e+06	1.6772e+08	2.02912e+06	2.20376e+07	8.04512e+08	1.61871e+08	1.29309e+07	1.39075e+07	5.95474e+07	3.27712e+06	1.48856e+06	6.75023e+07	6.51369e+06	3.04371e+08	2.68271e+08	6.83157e+06	3.83301e+08	5.71129e+08	1.64549e+06
CS25067	268 B2 d14	untreated d14	268	OvC1			497568	503173	2.43794e+07	98547.3	3.1991e+06	448876	726035	1.43443e+06	195627	1.62619e+08	1.10301e+08	2.90837e+06	2.51302e+07	837792	1.71478e+07	2.41184e+06	9.97997e+06	8.71613e+07	6.8205e+07	2.20058e+06	1.90892e+06	1.21614e+08	6.1895e+08	2.54136e+06	2.48976e+06	1.7076e+08	1.83999e+06	1.66728e+07	6.5329e+08	1.60827e+08	1.48458e+07	1.56001e+07	5.57684e+07	2.64133e+06	1.02164e+06	7.99126e+07	6.37827e+06	2.87896e+08	1.99416e+08	6.23699e+06	3.91443e+08	4.9236e+08	1.6509e+06
CS25068	268 B1 d21	untreated d21	268	OvC1			436163	880980	2.62904e+07	183541	3.53185e+06	422345	789911	1.48397e+06	189956	1.75286e+08	1.13377e+08	3.16434e+06	2.74468e+07	1.111e+06	1.74505e+07	1.52467e+06	1.13011e+07	8.96286e+07	8.24385e+07	2.76121e+06	2.02907e+06	1.11359e+08	5.93464e+08	2.82702e+06	3.94915e+06	1.8956e+08	1.7382e+06	1.83804e+07	7.78809e+08	1.79294e+08	1.58086e+07	1.6659e+07	6.25054e+07	3.70208e+06	988555	8.18251e+07	6.99965e+06	3.08396e+08	2.74795e+08	6.78585e+06	3.95916e+08	5.50456e+08	1.75047e+06
CS25069	268 B2 d21	untreated d21	268	OvC1			394035	615774	2.68274e+07	101728	3.48235e+06	353945	699702	1.49327e+06	211253	1.74869e+08	1.04057e+08	3.14993e+06	2.87311e+07	1.04918e+06	1.5795e+07	1.92986e+06	1.10057e+07	9.57249e+07	7.62462e+07	2.56716e+06	1.85152e+06	1.29033e+08	6.91883e+08	2.79417e+06	2.22001e+06	1.84008e+08	1.93055e+06	1.24384e+07	6.16535e+08	1.72269e+08	1.36751e+07	1.59986e+07	6.19766e+07	3.23107e+06	751963	7.79066e+07	6.95205e+06	3.07364e+08	2.3567e+08	6.50701e+06	4.2285e+08	5.88595e+08	1.65973e+06
CS25070	268 C1 d14	carboplatin d14	268	OvC1			609140	743030	2.69558e+07	104366	3.09421e+06	577297	757122	1.58709e+06	198006	1.73739e+08	1.06071e+08	3.11768e+06	2.69329e+07	1.09021e+06	1.66804e+07	2.42579e+06	1.12444e+07	9.03294e+07	7.27775e+07	1.98758e+06	1.87267e+06	1.30717e+08	7.13236e+08	2.83642e+06	2.66672e+06	1.69137e+08	2.14204e+06	1.48064e+07	5.12493e+08	1.58264e+08	1.24858e+07	1.50609e+07	5.14075e+07	2.20695e+06	1.95777e+06	7.43384e+07	6.67929e+06	2.98817e+08	2.07333e+08	6.4358e+06	3.92313e+08	5.76845e+08	1.57297e+06
CS25071	268 C2 d14	carboplatin d14	268	OvC1			385186	129540	2.68516e+07	108646	2.42449e+06	423553	615061	1.50967e+06	196919	1.78929e+08	1.0151e+08	3.2014e+06	2.61824e+07	822981	1.64559e+07	1.83008e+06	1.04438e+07	8.91371e+07	7.65273e+07	2.0088e+06	1.86622e+06	1.4322e+08	7.64977e+08	2.56164e+06	1.75341e+06	1.68187e+08	1.85922e+06	1.2982e+07	3.8311e+08	1.6363e+08	1.29727e+07	1.50359e+07	5.37178e+07	2.01618e+06	921283	7.97489e+07	6.63662e+06	2.91331e+08	1.93784e+08	6.20421e+06	4.14974e+08	6.08455e+08	1.57677e+06
CS25072	268 C1 d21	carboplatin d21	268	OvC1			361584	80445	2.7278e+07	90721.6	2.45527e+06	349486	644762	1.51752e+06	190542	1.74836e+08	1.06131e+08	3.29316e+06	2.83164e+07	1.08843e+06	1.67845e+07	1.70197e+06	1.12718e+07	9.14905e+07	7.99122e+07	2.30845e+06	2.18357e+06	1.41036e+08	7.04174e+08	2.78695e+06	1.88463e+06	1.82293e+08	1.87482e+06	1.72318e+07	5.66997e+08	1.74555e+08	1.38249e+07	1.75758e+07	5.62357e+07	2.89335e+06	718138	9.15995e+07	7.08879e+06	3.07522e+08	1.88753e+08	6.75337e+06	4.38377e+08	6.48852e+08	1.69647e+06
CS25073	268 C2 d21	carboplatin d21	268	OvC1			164693	137117	2.61237e+07	71948.4	1.06611e+06	156600	446469	1.27373e+06	206398	1.70691e+08	9.82765e+07	2.99554e+06	2.77942e+07	906492	1.75043e+07	645211	1.06915e+07	9.40375e+07	7.7497e+07	2.55959e+06	1.884e+06	1.3976e+08	7.72275e+08	2.68905e+06	2.58192e+06	1.96441e+08	1.71635e+06	5.9774e+06	3.35647e+08	1.81451e+08	1.29796e+07	1.4493e+07	5.46025e+07	2.86629e+06	674905	9.34555e+07	7.01681e+06	2.98031e+08	1.53615e+08	6.46684e+06	4.26367e+08	6.11359e+08	1.60754e+06
CS25074	268 D1 d14	paclitaxel d14	268	OvC1			400934	195648	2.96432e+07	71860.9	4.1408e+06	348365	706827	1.6056e+06	216578	1.93582e+08	1.38916e+08	3.55524e+06	2.98511e+07	1.07215e+06	2.23093e+07	1.49033e+06	1.18454e+07	1.06712e+08	8.72684e+07	2.23609e+06	2.35903e+06	1.56946e+08	8.60536e+08	3.18547e+06	1.4191e+06	2.0363e+08	2.17673e+06	1.08333e+07	4.46652e+08	1.82016e+08	1.57062e+07	1.9282e+07	6.79255e+07	3.18871e+06	341308	1.00025e+08	7.69281e+06	3.45085e+08	2.865e+08	7.02213e+06	4.64961e+08	7.11218e+08	1.8384e+06
CS25075	268 D2 d14	paclitaxel d14	268	OvC1			392913	176545	2.70637e+07	64398.6	3.118e+06	323634	646467	1.38073e+06	207678	1.735e+08	1.10416e+08	3.14541e+06	2.71719e+07	1.16055e+06	2.00438e+07	1.33567e+06	1.10444e+07	9.28557e+07	7.75919e+07	1.946e+06	2.06651e+06	1.40049e+08	7.69862e+08	2.72364e+06	1.77585e+06	1.70067e+08	1.99956e+06	1.13216e+07	4.34459e+08	1.64064e+08	1.50897e+07	1.84348e+07	5.70275e+07	2.87119e+06	286084	7.86289e+07	6.72619e+06	2.99119e+08	2.43371e+08	6.25057e+06	4.17091e+08	6.29958e+08	1.74682e+06
CS25076	268 D1 d21	paclitaxel d21	268	OvC1			264410	106847	2.65798e+07	107763	3.14212e+06	258201	527879	1.3802e+06	190433	1.71105e+08	1.00488e+08	3.01867e+06	2.81292e+07	1.13144e+06	1.78183e+07	1.15148e+06	1.10941e+07	8.99939e+07	7.76079e+07	2.34647e+06	1.8488e+06	1.46934e+08	6.79247e+08	2.73068e+06	1.29555e+06	1.75701e+08	1.96506e+06	8.4206e+06	2.43424e+08	1.65593e+08	1.48286e+07	1.55004e+07	6.04381e+07	3.1276e+06	99656	8.5782e+07	6.7483e+06	3.00331e+08	2.12473e+08	6.24631e+06	4.14252e+08	6.17271e+08	1.64909e+06
CS25077	268 D2 d21	paclitaxel d21	268	OvC1			275540	104817	2.65868e+07	71404.9	3.10386e+06	229859	508900	1.39589e+06	202335	1.65257e+08	1.04043e+08	3.03175e+06	2.58129e+07	1.17449e+06	1.7721e+07	959928	1.08704e+07	8.91838e+07	7.89186e+07	1.82344e+06	1.71545e+06	1.4285e+08	7.6048e+08	2.73283e+06	1.18633e+06	1.70847e+08	1.8525e+06	9.98448e+06	2.60874e+08	1.58924e+08	1.1855e+07	1.52518e+07	5.8969e+07	2.80674e+06	79706.6	8.21966e+07	6.91777e+06	2.86606e+08	2.03239e+08	6.23171e+06	4.24484e+08	5.76643e+08	1.59099e+06
CS25078	268 E1 d14	carboplatin + paclitaxel d14	268	OvC1			261582	626978	2.85398e+07	94342.2	2.78328e+06	374602	578290	1.54555e+06	205472	1.8865e+08	1.10437e+08	3.45853e+06	3.16794e+07	1.08182e+06	2.28353e+07	1.09589e+06	1.21779e+07	9.61291e+07	8.4275e+07	1.55128e+06	2.20344e+06	1.48493e+08	8.25e+08	2.91102e+06	1.5625e+06	1.89474e+08	2.01083e+06	8.24735e+06	4.17887e+08	1.66417e+08	1.5953e+07	1.86372e+07	5.53078e+07	2.40464e+06	458909	9.60996e+07	7.55169e+06	3.31668e+08	2.31987e+08	6.85486e+06	4.4464e+08	6.68493e+08	1.84826e+06
CS25079	268 E2 d14	carboplatin + paclitaxel d14	268	OvC1			156370	459843	2.66808e+07	124647	988171	143480	422653	1.26721e+06	194295	1.72038e+08	1.09605e+08	3.12058e+06	2.85037e+07	894737	2.06667e+07	725834	1.10326e+07	9.32537e+07	7.94797e+07	2.11705e+06	1.83705e+06	1.62847e+08	8.41184e+08	2.80229e+06	1.39356e+06	1.85306e+08	1.81434e+06	3.60793e+06	2.49151e+08	1.73107e+08	1.68632e+07	1.73587e+07	5.28447e+07	2.04228e+06	110897	9.30785e+07	6.96532e+06	2.99924e+08	1.74523e+08	6.21228e+06	4.44902e+08	6.43824e+08	1.62594e+06
CS25080	268 E1 d21	carboplatin + paclitaxel d21	268	OvC1			242139	198101	2.492e+07	82581.5	1.21432e+06	223222	436006	1.41105e+06	188804	1.65737e+08	1.02152e+08	2.87654e+06	2.85239e+07	1.07637e+06	1.7805e+07	791681	1.12677e+07	8.85788e+07	7.42854e+07	1.66916e+06	1.99395e+06	1.47084e+08	7.98312e+08	2.6159e+06	1.68571e+06	1.65918e+08	1.98068e+06	5.91613e+06	2.02301e+08	1.63225e+08	1.5558e+07	1.45146e+07	4.99803e+07	2.52106e+06	89551	8.70158e+07	6.7081e+06	2.8621e+08	1.65029e+08	6.12041e+06	3.99855e+08	5.82644e+08	1.58418e+06
CS25081	268 E2 d21	carboplatin + paclitaxel d21	268	OvC1			165937	114681	2.79617e+07	103602	638826	141343	397978	1.23251e+06	197696	1.73932e+08	1.12196e+08	3.32031e+06	2.8868e+07	1.21233e+06	2.01508e+07	576311	1.19474e+07	9.61601e+07	7.98686e+07	2.0806e+06	1.83847e+06	1.66224e+08	9.11687e+08	2.89401e+06	1.19046e+06	1.90675e+08	1.81006e+06	3.49566e+06	1.58455e+08	1.81547e+08	1.67593e+07	1.71482e+07	5.39253e+07	2.54269e+06	39783.8	1.01328e+08	6.8247e+06	3.07511e+08	1.46619e+08	6.63994e+06	4.42886e+08	6.45088e+08	1.63877e+06
CS25082	279 B1 d14	untreated d14	279	OvC9			1.86784e+06	650725	3.82363e+07	2.88616e+06	5.88799e+06	956388	2.82338e+06	2.28269e+06	230143	1.72417e+08	1.55747e+08	3.39076e+06	3.43082e+07	1.00048e+06	2.33023e+07	1.03655e+06	1.09645e+07	1.02352e+08	1.00902e+08	3.03677e+06	2.26445e+06	7.3671e+07	3.6176e+08	3.08312e+06	2.17469e+07	1.84224e+08	2.05925e+06	1.85298e+07	1.20728e+09	1.83639e+08	1.57511e+07	1.58183e+07	6.96694e+07	2.00932e+06	5.13845e+06	1.05679e+08	6.96338e+06	3.33352e+08	2.63222e+08	5.6289e+06	2.56502e+08	6.36852e+08	1.2927e+06
CS25083	279 B2 d14	untreated d14	279	OvC9			6.65001e+06	597245	3.08444e+07	2.01358e+06	2.30623e+06	652175	3.99966e+06	2.99511e+06	217432	1.47475e+08	1.55445e+08	2.88404e+06	4.88574e+07	1.99262e+06	3.70806e+07	932804	8.96649e+06	1.10375e+08	8.74032e+07	2.59605e+06	1.90425e+06	6.55948e+07	1.77713e+08	2.54016e+06	6.29011e+07	1.70691e+08	2.56598e+06	1.85794e+07	1.05088e+09	1.74298e+08	1.7313e+07	8.07507e+06	5.75075e+07	1.8712e+06	3.86576e+06	1.01089e+08	6.17754e+06	2.92794e+08	3.24167e+08	5.24804e+06	1.52953e+08	4.58964e+08	859375
CS25084	279 B1 d21	untreated d21	279	OvC9			638562	746774	3.96068e+07	872281	381765	82610.9	902617	1.97389e+06	228196	1.82864e+08	1.52533e+08	3.16219e+06	3.53187e+07	1.50265e+06	2.38533e+07	523981	1.30812e+07	1.24538e+08	1.03646e+08	2.61294e+06	2.12965e+06	1.29645e+08	6.74365e+08	3.41903e+06	1.01309e+07	1.89265e+08	2.09871e+06	5.11532e+06	8.2314e+08	1.9837e+08	1.64451e+07	2.07727e+07	6.61711e+07	3.52637e+06	2.34217e+06	1.17052e+08	7.60335e+06	3.43045e+08	2.00427e+08	5.9616e+06	3.66251e+08	7.13306e+08	1.40983e+06
CS25085	279 B2 d21	untreated d21	279	OvC9			83307.1	94307	3.93548e+07	196304	241545	85742.4	551679	1.31104e+06	213058	1.74395e+08	1.14948e+08	3.0699e+06	3.36718e+07	1.30091e+06	2.06815e+07	428488	1.32921e+07	1.08804e+08	8.89983e+07	2.48283e+06	1.81436e+06	1.27942e+08	8.20778e+08	2.71756e+06	4.75443e+06	1.85835e+08	1.66204e+06	1.38016e+06	1.41689e+08	1.822e+08	1.40499e+07	1.39054e+07	5.8921e+07	3.8712e+06	109538	1.01952e+08	6.73179e+06	2.95047e+08	1.19565e+08	5.4442e+06	4.12654e+08	7.45935e+08	1.50022e+06
CS25086	279 C1 d14	carboplatin d14	279	OvC9			6.64058e+06	563265	3.37526e+07	3.75034e+06	1.71567e+06	1.02626e+06	4.19263e+06	3.35193e+06	235160	1.48234e+08	1.64804e+08	3.66625e+06	4.78519e+07	1.11604e+06	2.70462e+07	1.23754e+06	9.78845e+06	1.11194e+08	9.46799e+07	2.64713e+06	2.18017e+06	7.54137e+07	3.11245e+08	3.03838e+06	3.80429e+07	1.70293e+08	6.50708e+06	3.919e+07	1.07946e+09	1.67208e+08	1.81132e+07	1.58371e+07	5.96064e+07	2.07594e+06	8.51074e+06	1.06657e+08	7.12764e+06	3.136e+08	3.63135e+08	4.7246e+06	2.02711e+08	5.87003e+08	875480
CS25087	279 C2 d14	carboplatin d14	279	OvC9			3.92453e+06	598773	3.31059e+07	2.81757e+06	2.33696e+06	1.16444e+06	3.30834e+06	2.7733e+06	232425	1.51898e+08	1.47318e+08	3.16531e+06	3.85519e+07	1.15268e+06	2.96871e+07	882147	1.00301e+07	1.0604e+08	9.13872e+07	2.66967e+06	2.08424e+06	7.65651e+07	3.38037e+08	2.99826e+06	3.23341e+07	1.70781e+08	2.75491e+06	2.65994e+07	1.11116e+09	1.66306e+08	1.56306e+07	1.71722e+07	5.70103e+07	2.09711e+06	6.48405e+06	1.07668e+08	7.11021e+06	3.04056e+08	3.12236e+08	5.0401e+06	2.34951e+08	5.70292e+08	941952
CS25088	279 C1 d21	carboplatin d21	279	OvC9			595072	205027	3.77228e+07	688830	131521	44158.3	1.05433e+06	2.07699e+06	205697	1.70443e+08	1.38093e+08	3.16214e+06	3.88062e+07	1.24337e+06	2.87277e+07	466059	1.29856e+07	1.20769e+08	9.99185e+07	2.82548e+06	1.94869e+06	1.50519e+08	8.18461e+08	3.28222e+06	7.77162e+06	1.89801e+08	2.37033e+06	7.6922e+06	4.49326e+08	1.99052e+08	1.91532e+07	1.98069e+07	5.79502e+07	2.98295e+06	759300	1.12989e+08	7.33534e+06	3.51082e+08	1.89746e+08	5.97794e+06	3.92265e+08	7.28679e+08	1.20172e+06
CS25089	279 C2 d21	carboplatin d21	279	OvC9			296057	129699	3.59946e+07	371460	173167	41992.5	639632	1.76557e+06	227694	1.63896e+08	1.15029e+08	3.05111e+06	3.47945e+07	1.36444e+06	2.39301e+07	373589	1.32213e+07	1.11067e+08	9.08213e+07	2.57228e+06	1.82901e+06	1.41102e+08	5.70002e+08	3.01605e+06	6.48297e+06	1.9379e+08	1.90058e+06	3.25952e+06	3.17868e+08	1.86935e+08	1.82157e+07	1.60929e+07	5.36427e+07	3.22295e+06	471463	1.08466e+08	7.32858e+06	3.11428e+08	1.58764e+08	5.70954e+06	3.99101e+08	6.866e+08	1.39036e+06
CS25090	279 D1 d14	paclitaxel d14	279	OvC9			5.63902e+06	768404	3.86943e+07	1.3373e+07	3.79225e+06	1.48717e+06	4.89206e+06	3.54697e+06	216790	1.58685e+08	1.99181e+08	3.68901e+06	4.36249e+07	1.4822e+06	2.98755e+07	1.99511e+06	1.11293e+07	1.21106e+08	1.08654e+08	2.58399e+06	2.33673e+06	3.59996e+07	2.46264e+08	3.51158e+06	3.82212e+07	2.01135e+08	2.97354e+06	2.02355e+07	1.39199e+09	2.06079e+08	2.05908e+07	1.41858e+07	7.46126e+07	2.96372e+06	9.66557e+06	1.15577e+08	8.56052e+06	3.28827e+08	4.46213e+08	5.92458e+06	2.03099e+08	6.48926e+08	1.19043e+06
CS25091	279 D2 d14	paclitaxel d14	279	OvC9			3.73157e+06	889858	3.79643e+07	7.6735e+06	9.2977e+06	1.59319e+06	3.67448e+06	3.05642e+06	205271	1.52298e+08	1.66565e+08	3.68999e+06	3.84155e+07	1.05853e+06	2.43278e+07	1.96905e+06	1.11604e+07	1.09129e+08	9.7462e+07	2.26961e+06	2.39995e+06	6.12784e+07	1.68057e+08	3.15117e+06	2.07784e+07	1.7879e+08	2.36999e+06	9.66933e+06	1.14116e+09	1.78805e+08	1.50782e+07	1.84546e+07	6.73055e+07	2.76106e+06	9.37159e+06	9.22416e+07	7.68829e+06	3.08069e+08	3.4862e+08	5.41468e+06	2.48473e+08	6.18123e+08	1.53403e+06
CS25092	279 D1 d21	paclitaxel d21	279	OvC9			663519	237336	3.91101e+07	2.79486e+06	336166	96710.6	1.14639e+06	2.62908e+06	198878	1.77318e+08	1.6173e+08	3.49306e+06	3.8864e+07	1.30406e+06	3.70723e+07	727689	1.20388e+07	1.19576e+08	1.02433e+08	3.02863e+06	2.26692e+06	1.34514e+08	5.71639e+08	3.4351e+06	7.48655e+06	2.01589e+08	2.05719e+06	2.67234e+06	8.00367e+08	2.05125e+08	1.42448e+07	2.35813e+07	7.13606e+07	3.33435e+06	1.21481e+06	1.19602e+08	7.95421e+06	3.74133e+08	2.26822e+08	7.17778e+06	4.1155e+08	7.05856e+08	1.6124e+06
CS25093	279 D2 d21	paclitaxel d21	279	OvC9			1.55096e+06	380454	3.49086e+07	6.30687e+06	746651	189928	1.95436e+06	2.28889e+06	224701	1.43062e+08	1.52624e+08	3.447e+06	3.48639e+07	1.13234e+06	3.35566e+07	813064	1.10334e+07	1.12786e+08	9.70883e+07	2.793e+06	2.35911e+06	1.06807e+08	5.37792e+08	3.26514e+06	1.27056e+07	1.94463e+08	1.91214e+06	7.25393e+06	1.05096e+09	1.90941e+08	1.28129e+07	2.20587e+07	6.25385e+07	3.37711e+06	3.08338e+06	1.17041e+08	7.596e+06	3.23933e+08	2.59558e+08	5.99546e+06	3.30241e+08	7.23647e+08	1.27121e+06
CS25094	279 E1 d14	carboplatin + paclitaxel d14	279	OvC9			4.02478e+06	454254	3.13281e+07	2.06168e+06	4.83405e+06	1.3463e+06	2.8368e+06	3.35054e+06	204721	1.32818e+08	1.72568e+08	3.29188e+06	4.06316e+07	1.05109e+06	3.58615e+07	1.27804e+06	9.42319e+06	1.10852e+08	9.19096e+07	2.14697e+06	2.06421e+06	9.14808e+07	4.32166e+08	3.00285e+06	2.70761e+07	1.73135e+08	2.73374e+06	1.1547e+07	1.01988e+09	1.65596e+08	1.55921e+07	1.98595e+07	5.66503e+07	2.24579e+06	8.09553e+06	1.01971e+08	7.29964e+06	3.19773e+08	3.23329e+08	5.74082e+06	2.88107e+08	5.89233e+08	873372
CS25095	279 E2 d14	carboplatin + paclitaxel d14	279	OvC9			3.40957e+06	313048	3.02898e+07	1.54209e+06	2.24743e+06	877812	2.47366e+06	2.89185e+06	210142	1.40439e+08	1.5829e+08	3.20262e+06	4.12112e+07	1.08387e+06	2.59392e+07	953604	1.0351e+07	1.04972e+08	8.87733e+07	2.23147e+06	2.25575e+06	8.72855e+07	4.46621e+08	2.85166e+06	2.40702e+07	1.66426e+08	2.42505e+06	6.41084e+06	1.0324e+09	1.79601e+08	1.78059e+07	1.6757e+07	5.49699e+07	2.57385e+06	6.49008e+06	1.04171e+08	7.28638e+06	3.19079e+08	2.87734e+08	5.82422e+06	2.86314e+08	6.04078e+08	954072
CS25096	279 E1 d21	carboplatin + paclitaxel d21	279	OvC9			38967.2	73559	3.95554e+07	193986	230673	55959.6	463740	1.65934e+06	199989	1.79355e+08	1.28553e+08	3.4483e+06	3.77532e+07	1.08816e+06	2.71832e+07	509187	1.31698e+07	1.09915e+08	9.8215e+07	3.16751e+06	2.22646e+06	1.67009e+08	9.87731e+08	3.37954e+06	2.59473e+06	2.17623e+08	2.02066e+06	886224	1.3471e+08	2.00686e+08	1.87193e+07	1.75424e+07	6.21634e+07	4.12375e+06	154046	1.14431e+08	8.11426e+06	3.56287e+08	1.01841e+08	6.72397e+06	4.9536e+08	7.78714e+08	1.824e+06
CS25097	279 E2 d21	carboplatin + paclitaxel d21	279	OvC9			49657.3	113832	3.12313e+07	162835	157987	29139.1	397552	1.28387e+06	210984	1.3324e+08	1.04925e+08	2.84748e+06	3.07898e+07	880063	2.23935e+07	360347	1.00675e+07	8.87473e+07	7.80921e+07	2.6617e+06	1.68043e+06	1.42002e+08	5.60793e+08	2.59182e+06	2.76021e+06	1.70732e+08	1.65155e+06	581011	1.12216e+08	1.65199e+08	1.39238e+07	1.32276e+07	4.9292e+07	2.90428e+06	125826	9.45383e+07	6.02291e+06	2.7135e+08	9.10356e+07	5.2247e+06	3.92972e+08	6.8669e+08	1.47054e+06
CS25098	281 B1 d14	untreated d14	281	OvC4			952980	1.65173e+06	4.29531e+07	742334	6.51719e+06	3.20646e+06	1.57632e+06	1.86823e+06	203393	1.78648e+08	1.34053e+08	3.37764e+06	2.95576e+07	1.15199e+06	2.25335e+07	1.44316e+06	1.39531e+07	1.08731e+08	9.40025e+07	2.80251e+06	1.78174e+06	8.91609e+07	4.32907e+08	3.1331e+06	1.27973e+07	1.97924e+08	2.22148e+06	6.48142e+06	1.0547e+09	1.93114e+08	1.52945e+07	1.33649e+07	6.39274e+07	6.9445e+06	4.76384e+06	4.16638e+07	7.45398e+06	3.29586e+08	3.08758e+08	5.89821e+06	3.63762e+08	9.02189e+08	1.5213e+06
CS25099	281 B2 d14	untreated d14	281	OvC4			968155	2.66542e+06	3.48543e+07	503629	6.54904e+06	2.30826e+06	1.45584e+06	1.76255e+06	200751	1.51555e+08	1.32225e+08	3.20344e+06	2.51593e+07	1.00587e+06	1.96066e+07	1.10492e+06	1.17014e+07	9.74359e+07	8.43728e+07	2.33707e+06	1.69719e+06	7.88351e+07	4.37524e+08	2.9995e+06	7.86047e+06	1.76979e+08	2.44064e+06	8.61899e+06	8.75994e+08	1.6307e+08	1.13538e+07	7.88533e+06	5.76258e+07	5.93262e+06	4.74084e+06	3.48307e+07	6.69905e+06	3.0902e+08	2.92606e+08	5.51329e+06	3.50634e+08	7.84699e+08	1.37036e+06
CS25100	281 B1 d21	untreated d21	281	OvC4			512855	2.31174e+06	3.31033e+07	708210	4.62136e+06	1.86891e+06	1.059e+06	1.66155e+06	186005	1.42726e+08	1.2189e+08	3.07027e+06	2.66305e+07	925932	1.63998e+07	1.09122e+06	1.17597e+07	9.66062e+07	8.47625e+07	2.67597e+06	1.48362e+06	9.70714e+07	5.30303e+08	2.62479e+06	5.05481e+06	1.77492e+08	1.89053e+06	4.29123e+06	6.33816e+08	1.64132e+08	1.53192e+07	1.14293e+07	5.60359e+07	7.06872e+06	2.07379e+06	6.66575e+07	6.89985e+06	2.94826e+08	2.44975e+08	5.67874e+06	3.64262e+08	7.86795e+08	1.44487e+06
[truncated: 81 more rows]
[truncated: 8 more columns]
