# Supplementary material for: Exploring Metabolic Signatures of Ex Vivo Tumor Tissue Cultures for Prediction of Chemosensitivity in Ovarian Cancer
Source: Cancers (Basel). 2022 Sep 14;14(18):4460. doi: 10.3390/cancers14184460 (PMC9496731; doi:10.3390/cancers14184460)
Supplement: Supplementary file 1 [file cancers-14-04460-s001.zip › Supplementary File S4.xlsx]

## Sheet: PCR LDH
Table Analyzed	C+P day 14 (OvC1-8)
Dependent variable	E : LDH
Regression type	Least squares
Model
Analysis of Variance	SS	DF	MS	F (DFn, DFd)	P value
Regression	640.3	2	320.2	F (2, 13) = 18.73	P=0.0001
Residual	222.2	13	17.1
Total	862.6	15
Parameter estimates	Variable	Estimate	Standard error	95% CI (asymptotic)	|t|	P value	P value summary
β0	Intercept	24.88	1.177	22.33 to 27.42	21.14	<0.0001	****
β1	1-Methyl Adenosine	0.1033	0.03508	0.02747 to 0.1790	2.943	0.0114	*
β2	3-Hydroxybutyric acid	0.4509	0.1	0.2348 to 0.6670	4.507	0.0006	***
β3	3-Methylhistidine	-0.2995	0.06106	-0.4314 to -0.1676	4.905	0.0003	***
β4	3-Phenyllactic acid	0.4308	0.09196	0.2321 to 0.6295	4.685	0.0004	***
β5	3-Ureidopropionic acid	0.6209	0.1137	0.3753 to 0.8665	5.462	0.0001	***
β6	5,6-Dihydro Thymine	0.4623	0.09164	0.2643 to 0.6603	5.045	0.0002	***
β7	7-Methylguanine	-0.04948	0.0396	-0.1350 to 0.03606	1.25	0.2334	ns
β8	Acetylcholine	0.1383	0.04938	0.03161 to 0.2450	2.8	0.015	*
β9	Alanine	-0.1758	0.03114	-0.2431 to -0.1086	5.647	<0.0001	****
β10	Arginine	0.03358	0.03143	-0.03432 to 0.1015	1.068	0.3047	ns
β11	Betaine	-0.3224	0.06026	-0.4526 to -0.1922	5.35	0.0001	***
β12	Butyrylcarnitine	-0.2657	0.04576	-0.3646 to -0.1668	5.807	<0.0001	****
β13	Carnitine	-0.3177	0.06393	-0.4558 to -0.1796	4.97	0.0003	***
β14	Carnosine	-0.3512	0.06876	-0.4997 to -0.2026	5.107	0.0002	***
β15	Choline	-0.02206	0.03252	-0.09231 to 0.04819	0.6783	0.5095	ns
β16	Citric acid	-0.1741	0.04283	-0.2667 to -0.08162	4.066	0.0013	**
β17	Citrulline	0.06639	0.04909	-0.03965 to 0.1724	1.353	0.1993	ns
β18	Creatine	0.0351	0.04064	-0.05270 to 0.1229	0.8636	0.4035	ns
β19	Creatinine	-0.248	0.04119	-0.3370 to -0.1590	6.021	<0.0001	****
β20	Cystine	0.002282	0.04347	-0.09164 to 0.09620	0.05249	0.9589	ns
β21	Folic acid	-0.07744	0.02531	-0.1321 to -0.02277	3.06	0.0091	**
β22	Glutamic acid	-0.05121	0.03629	-0.1296 to 0.02719	1.411	0.1817	ns
β23	Hexose	-0.1043	0.02858	-0.1661 to -0.04257	3.65	0.0029	**
β24	Hippuric acid	-0.261	0.04333	-0.3546 to -0.1674	6.024	<0.0001	****
β25	Hypoxanthine	-0.005585	0.01827	-0.04505 to 0.03388	0.3057	0.7646	ns
β26	Isoleucine	-0.07393	0.02865	-0.1358 to -0.01203	2.58	0.0229	*
β27	Isovalerylcarnitine	-0.3225	0.08077	-0.4970 to -0.1480	3.993	0.0015	**
β28	Kynurenine	-0.1397	0.04981	-0.2473 to -0.03208	2.804	0.0149	*
β29	Lactic acid	-0.05841	0.05176	-0.1702 to 0.05342	1.128	0.2796	ns
β30	Leucine	-0.06061	0.02855	-0.1223 to 0.001066	2.123	0.0535	ns
β31	Lysine	-0.169	0.02785	-0.2292 to -0.1088	6.069	<0.0001	****
β32	Mannitol/sorbitol	0.08414	0.04831	-0.02023 to 0.1885	1.742	0.1052	ns
β33	Methionine	-0.04975	0.02537	-0.1046 to 0.005073	1.96	0.0717	ns
β34	Methionine sulfoxide	0.1235	0.03643	0.04478 to 0.2022	3.39	0.0048	**
β35	N8-Acetylspermidine	0.0638	0.02221	0.01581 to 0.1118	2.872	0.0131	*
β36	Nicotine amide	-0.05324	0.03311	-0.1248 to 0.01829	1.608	0.1319	ns
β37	Pantothenic acid	-0.03956	0.02814	-0.1003 to 0.02123	1.406	0.1832	ns
β38	Phenylalanine	-0.0802	0.02698	-0.1385 to -0.02191	2.972	0.0108	*
β39	Proline	-0.1389	0.03513	-0.2148 to -0.06304	3.955	0.0016	**
β40	Propionylcarnitine	-0.04083	0.0315	-0.1089 to 0.02723	1.296	0.2175	ns
β41	Pyridoxine	-0.2776	0.04549	-0.3759 to -0.1794	6.103	<0.0001	****
β42	Pyroglutamic acid	-0.2215	0.03707	-0.3016 to -0.1414	5.976	<0.0001	****
β43	Succinic acid	0.02699	0.03984	-0.05908 to 0.1131	0.6774	0.51	ns
β44	Thiamine	-0.08236	0.0179	-0.1210 to -0.04368	4.6	0.0005	***
β45	Threonine	-0.1348	0.0243	-0.1873 to -0.08234	5.549	<0.0001	****
β46	Trigonelline	-0.188	0.05667	-0.3104 to -0.06556	3.317	0.0056	**
β47	Trimethylamine N-Oxide	-0.2749	0.05308	-0.3896 to -0.1602	5.179	0.0002	***
β48	Tryptophan	-0.04398	0.02946	-0.1076 to 0.01968	1.493	0.1594	ns
β49	Tyrosine	-0.1071	0.02704	-0.1655 to -0.04870	3.961	0.0016	**
β50	Valine	-0.1321	0.025	-0.1861 to -0.07808	5.283	0.0001	***
β51	?-aminobutyric acid	-0.09228	0.02816	-0.1531 to -0.03144	3.277	0.006	**
β52	2?-Deoxycytidine	-0.09903	0.01622	-0.1341 to -0.06399	6.105	<0.0001	****
β53	3-Methyl-2-oxovaleric acid	0.7967	0.1909	0.3844 to 1.209	4.174	0.0011	**
β54	3-Methyladipic acid	-0.147	0.02873	-0.2090 to -0.08488	5.114	0.0002	***
β55	3-Methylglutaconic acid	-1.681	0.3275	-2.388 to -0.9734	5.133	0.0002	***
β56	4-Guanidinobutyric acid	0.2629	0.06447	0.1236 to 0.4022	4.077	0.0013	**
β57	4-Methyl-2-oxovaleric acid	0.3537	0.09397	0.1507 to 0.5567	3.764	0.0024	**
β58	5-Methoxytryptophan	0.1111	0.02779	0.05105 to 0.1711	3.997	0.0015	**
β59	8-Aminooctanoic acid	0.07418	0.02209	0.02646 to 0.1219	3.358	0.0051	**
β60	Allantoin	0.233	0.07365	0.07388 to 0.3921	3.163	0.0075	**
β61	cis-Aconitic acid	-0.2304	0.03794	-0.3124 to -0.1484	6.073	<0.0001	****
β62	Cysteine	-0.07004	0.01651	-0.1057 to -0.03437	4.242	0.001	***
β63	Glucos/galactos-amine	-0.442	0.0833	-0.6220 to -0.2621	5.307	0.0001	***
β64	Glutamine	0.1477	0.04288	0.05502 to 0.2403	3.444	0.0044	**
β65	Glyceric acid	-0.1379	0.02743	-0.1971 to -0.07860	5.026	0.0002	***
β66	Glycine	0.00176	0.01817	-0.03750 to 0.04102	0.09688	0.9243	ns
β67	Guanidoacetic acid	0.07167	0.02564	0.01628 to 0.1271	2.795	0.0152	*
β68	Histidine	-0.007901	0.03117	-0.07523 to 0.05943	0.2535	0.8038	ns
β69	Homoarginine	-0.2989	0.05138	-0.4099 to -0.1879	5.818	<0.0001	****
β70	Homocitrulline	-0.0205	0.02931	-0.08383 to 0.04282	0.6995	0.4966	ns
β71	Homoserine	-0.1731	0.02847	-0.2346 to -0.1116	6.082	<0.0001	****
β72	Indole-3-lactic acid	0.5438	0.1241	0.2758 to 0.8118	4.383	0.0007	***
β73	Isocitric acid	-0.1422	0.02465	-0.1954 to -0.08890	5.767	<0.0001	****
β74	Malic acid	-0.121	0.02398	-0.1728 to -0.06920	5.046	0.0002	***
β75	N-Acetyl-aspartic acid	0.2273	0.04088	0.1390 to 0.3156	5.561	<0.0001	****
β76	N-Acetyl-glucosamine	0.1819	0.05059	0.07260 to 0.2912	3.596	0.0033	**
β77	N-Acetyl-ornithine	-0.3248	0.07044	-0.4770 to -0.1726	4.61	0.0005	***
β78	Ornithine	0.0007274	0.02761	-0.05891 to 0.06037	0.02635	0.9794	ns
β79	Phosphoenolpyruvic acid	0.03195	0.02807	-0.02868 to 0.09259	1.138	0.2755	ns
β80	Pyridoxal	-0.04718	0.04938	-0.1539 to 0.05950	0.9554	0.3568	ns
β81	Pyridoxamine	-0.0663	0.03175	-0.1349 to 0.002283	2.088	0.057	ns
β82	Rhamnose	0.05845	0.03969	-0.02731 to 0.1442	1.472	0.1647	ns
β83	Taurine	0.03776	0.03381	-0.03529 to 0.1108	1.117	0.2843	ns
β84	Uric acid	-0.1578	0.03674	-0.2372 to -0.07846	4.296	0.0009	***
β85	Uridine	0.1763	0.05869	0.04954 to 0.3031	3.004	0.0102	*
β86	Xanthine	0.3295	0.0594	0.2012 to 0.4578	5.547	<0.0001	****
β87	Xylose	-0.07215	0.03769	-0.1536 to 0.009277	1.914	0.0779	ns
β88	Xylose	-0.1296	0.02565	-0.1850 to -0.07418	5.053	0.0002	***
Goodness of Fit
Degrees of Freedom	13
R squared	0.7423
Sum of Squares	222.2
Sy.x	4.135
Data summary
Total number of variables	88
Total number of components	15
Component selection method	Parallel analysis
Random seed	418678156
Number of simulations	1000
Number of selected components	2
Rows in table	16
Rows skipped (missing data)	0
Rows analyzed (# cases)	16

## Sheet: PCR CT regimen
Table Analyzed	C+P day 14 (OvC1-8)
Dependent variable	H : Chemotherapy regimen (aduvant vs neoadjuvant)
Regression type	Least squares
Model
Analysis of Variance	SS	DF	MS	F (DFn, DFd)	P value
Regression	2.312	2	1.156	F (2, 13) = 10.46	P=0.0020
Residual	1.438	13	0.1106
Total	3.75	15
Parameter estimates	Variable	Estimate	Standard error	95% CI (asymptotic)	|t|	P value	P value summary
β0	Intercept	0.3692	0.09464	0.1648 to 0.5737	3.901	0.0018	**
β1	1-Methyl Adenosine	-0.005415	0.002821	-0.01151 to 0.0006801	1.919	0.0772	ns
β2	3-Hydroxybutyric acid	-0.02874	0.008046	-0.04612 to -0.01136	3.572	0.0034	**
β3	3-Methylhistidine	0.01888	0.004911	0.008267 to 0.02949	3.844	0.002	**
β4	3-Phenyllactic acid	-0.02732	0.007396	-0.04330 to -0.01134	3.694	0.0027	**
β5	3-Ureidopropionic acid	-0.03852	0.009143	-0.05827 to -0.01877	4.213	0.001	**
β6	5,6-Dihydro Thymine	-0.02903	0.00737	-0.04495 to -0.01310	3.938	0.0017	**
β7	7-Methylguanine	0.003944	0.003184	-0.002936 to 0.01082	1.239	0.2374	ns
β8	Acetylcholine	-0.009398	0.003972	-0.01798 to -0.0008180	2.366	0.0342	*
β9	Alanine	0.01024	0.002504	0.004829 to 0.01565	4.089	0.0013	**
β10	Arginine	-0.002793	0.002528	-0.008254 to 0.002667	1.105	0.2891	ns
β11	Betaine	0.02007	0.004846	0.009595 to 0.03054	4.14	0.0012	**
β12	Butyrylcarnitine	0.01629	0.00368	0.008343 to 0.02424	4.428	0.0007	***
β13	Carnitine	0.01999	0.005141	0.008880 to 0.03109	3.888	0.0019	**
β14	Carnosine	0.02201	0.00553	0.01006 to 0.03395	3.98	0.0016	**
β15	Choline	0.0005076	0.002615	-0.005142 to 0.006158	0.1941	0.8491	ns
β16	Citric acid	0.01125	0.003445	0.003806 to 0.01869	3.265	0.0061	**
β17	Citrulline	-0.005187	0.003948	-0.01372 to 0.003341	1.314	0.2116	ns
β18	Creatine	-0.003118	0.003268	-0.01018 to 0.003942	0.9541	0.3574	ns
β19	Creatinine	0.01506	0.003313	0.007899 to 0.02221	4.545	0.0006	***
β20	Cystine	-0.001233	0.003496	-0.008786 to 0.006321	0.3526	0.73	ns
β21	Folic acid	0.00409	0.002035	-0.0003068 to 0.008487	2.01	0.0657	ns
β22	Glutamic acid	0.00218	0.002919	-0.004125 to 0.008485	0.7468	0.4684	ns
β23	Hexose	0.005676	0.002299	0.0007096 to 0.01064	2.469	0.0282	*
β24	Hippuric acid	0.01584	0.003485	0.008313 to 0.02337	4.546	0.0005	***
β25	Hypoxanthine	0.0007948	0.001469	-0.002379 to 0.003969	0.541	0.5977	ns
β26	Isoleucine	0.003777	0.002304	-0.001201 to 0.008756	1.639	0.1252	ns
β27	Isovalerylcarnitine	0.02088	0.006496	0.006844 to 0.03491	3.214	0.0068	**
β28	Kynurenine	0.009491	0.004006	0.0008363 to 0.01815	2.369	0.034	*
β29	Lactic acid	0.004784	0.004163	-0.004209 to 0.01378	1.149	0.2712	ns
β30	Leucine	0.002959	0.002296	-0.002002 to 0.007919	1.289	0.22	ns
β31	Lysine	0.01022	0.00224	0.005384 to 0.01506	4.565	0.0005	***
β32	Mannitol/sorbitol	-0.006212	0.003885	-0.01461 to 0.002182	1.599	0.1339	ns
β33	Methionine	0.002376	0.002041	-0.002032 to 0.006785	1.164	0.2652	ns
β34	Methionine sulfoxide	-0.008167	0.00293	-0.01450 to -0.001838	2.788	0.0154	*
β35	N8-Acetylspermidine	-0.00333	0.001787	-0.007190 to 0.0005294	1.864	0.085	ns
β36	Nicotine amide	0.002386	0.002663	-0.003366 to 0.008139	0.8962	0.3865	ns
β37	Pantothenic acid	0.001681	0.002263	-0.003207 to 0.006570	0.7429	0.4707	ns
β38	Phenylalanine	0.004214	0.00217	-0.0004748 to 0.008902	1.942	0.0742	ns
β39	Proline	0.009006	0.002826	0.002902 to 0.01511	3.187	0.0071	**
β40	Propionylcarnitine	0.001672	0.002534	-0.003802 to 0.007145	0.6597	0.5209	ns
β41	Pyridoxine	0.01656	0.003659	0.008654 to 0.02446	4.526	0.0006	***
β42	Pyroglutamic acid	0.01348	0.002982	0.007042 to 0.01992	4.522	0.0006	***
β43	Succinic acid	-0.002617	0.003204	-0.009539 to 0.004306	0.8166	0.4289	ns
β44	Thiamine	0.00464	0.00144	0.001529 to 0.007751	3.222	0.0067	**
β45	Threonine	0.007826	0.001954	0.003603 to 0.01205	4.004	0.0015	**
β46	Trigonelline	0.01247	0.004558	0.002625 to 0.02232	2.736	0.017	*
β47	Trimethylamine N-Oxide	0.01719	0.004269	0.007972 to 0.02642	4.028	0.0014	**
β48	Tryptophan	0.001916	0.00237	-0.003203 to 0.007035	0.8086	0.4333	ns
β49	Tyrosine	0.005902	0.002175	0.001204 to 0.01060	2.714	0.0177	*
β50	Valine	0.007601	0.002011	0.003257 to 0.01194	3.78	0.0023	**
β51	?-aminobutyric acid	0.004933	0.002265	3.938e-005 to 0.009826	2.178	0.0484	*
β52	2?-Deoxycytidine	0.005909	0.001304	0.003091 to 0.008727	4.53	0.0006	***
β53	3-Methyl-2-oxovaleric acid	-0.05129	0.01535	-0.08445 to -0.01812	3.341	0.0053	**
β54	3-Methyladipic acid	0.008412	0.002311	0.003420 to 0.01340	3.64	0.003	**
β55	3-Methylglutaconic acid	0.09627	0.02634	0.03938 to 0.1532	3.656	0.0029	**
β56	4-Guanidinobutyric acid	-0.01697	0.005185	-0.02817 to -0.005771	3.273	0.0061	**
β57	4-Methyl-2-oxovaleric acid	-0.02307	0.007557	-0.03940 to -0.006747	3.053	0.0092	**
β58	5-Methoxytryptophan	-0.007191	0.002235	-0.01202 to -0.002362	3.217	0.0067	**
β59	8-Aminooctanoic acid	-0.003982	0.001777	-0.007821 to -0.0001433	2.241	0.0431	*
β60	Allantoin	-0.01556	0.005923	-0.02835 to -0.002761	2.627	0.0209	*
β61	cis-Aconitic acid	0.01393	0.003052	0.007340 to 0.02053	4.566	0.0005	***
β62	Cysteine	0.003899	0.001328	0.001031 to 0.006767	2.937	0.0116	*
β63	Glucos/galactos-amine	0.02755	0.006699	0.01307 to 0.04202	4.112	0.0012	**
β64	Glutamine	-0.009746	0.003449	-0.01720 to -0.002296	2.826	0.0143	*
β65	Glyceric acid	0.007871	0.002206	0.003105 to 0.01264	3.568	0.0034	**
β66	Glycine	-0.0005636	0.001461	-0.003721 to 0.002594	0.3857	0.706	ns
β67	Guanidoacetic acid	-0.004872	0.002062	-0.009327 to -0.0004172	2.363	0.0344	*
β68	Histidine	-0.0003114	0.002507	-0.005726 to 0.005104	0.1242	0.903	ns
β69	Homoarginine	0.01832	0.004132	0.009397 to 0.02725	4.435	0.0007	***
β70	Homocitrulline	0.000495	0.002357	-0.004598 to 0.005588	0.21	0.8369	ns
β71	Homoserine	0.01046	0.002289	0.005514 to 0.01541	4.569	0.0005	***
β72	Indole-3-lactic acid	-0.03479	0.009977	-0.05634 to -0.01323	3.486	0.004	**
β73	Isocitric acid	0.008314	0.001983	0.004031 to 0.01260	4.194	0.0011	**
β74	Malic acid	0.006913	0.001929	0.002746 to 0.01108	3.584	0.0033	**
β75	N-Acetyl-aspartic acid	-0.01406	0.003288	-0.02116 to -0.006956	4.276	0.0009	***
β76	N-Acetyl-glucosamine	-0.01194	0.004069	-0.02073 to -0.003148	2.934	0.0116	*
β77	N-Acetyl-ornithine	0.02064	0.005665	0.008400 to 0.03288	3.643	0.003	**
β78	Ornithine	-0.0007396	0.00222	-0.005536 to 0.004057	0.3331	0.7444	ns
β79	Phosphoenolpyruvic acid	-0.002611	0.002257	-0.007487 to 0.002266	1.157	0.2682	ns
β80	Pyridoxal	0.004058	0.003971	-0.004522 to 0.01264	1.022	0.3255	ns
β81	Pyridoxamine	0.003223	0.002553	-0.002293 to 0.008739	1.262	0.2291	ns
β82	Rhamnose	-0.004475	0.003192	-0.01137 to 0.002421	1.402	0.1844	ns
β83	Taurine	-0.003102	0.002719	-0.008977 to 0.002773	1.141	0.2746	ns
β84	Uric acid	0.01012	0.002955	0.003739 to 0.01650	3.426	0.0045	**
β85	Uridine	-0.01186	0.00472	-0.02206 to -0.001663	2.513	0.026	*
β86	Xanthine	-0.02039	0.004777	-0.03071 to -0.01007	4.267	0.0009	***
β87	Xylose	0.003423	0.003031	-0.003126 to 0.009972	1.129	0.2792	ns
β88	Xylose	0.007405	0.002063	0.002948 to 0.01186	3.59	0.0033	**
Goodness of Fit
Degrees of Freedom	13
R squared	0.6167
Sum of Squares	1.438
Sy.x	0.3325
Data summary
Total number of variables	88
Total number of components	15
Component selection method	Parallel analysis
Random seed	419745390
Number of simulations	1000
Number of selected components	2
Rows in table	16
Rows skipped (missing data)	0
Rows analyzed (# cases)	16

## Sheet: Figure 6 ii
Condition	Metabolites	Metabolite class
Untreated control	3-Phenyllactic acid	other organic compounds
	2'-Deoxycytidine	Nucleosides, nucleotides, and analogues
	Indole-3-lactic acid	organic acids
	Tryptophan	amino acid
	4-Guanidinobutyric acid	organic acids
	3-Hydroxybutyric acid	organic acids
	1-Methyl Adenosine	Nucleosides, nucleotides, and analogues
	N-Acetyl-aspartic acid	amino acid
	Cystine	amino acid
	8-Aminooctanoic acid	Fatty acids and conjugates
	N-Acetyl-ornithine	amino acid
	Trimethylamine N-Oxide	other organic compounds
	Guanidoacetic acid	amino acid
	Betaine	amino acid
	Carnitine	Carnitines & acylcarnitines
	3-Methylhistidine	amino acid
	Homoarginine	amino acid
	Mannitol/sorbitol	Carbohydrates and carbohydrate conjugates
	Glycine	amino acid
	Uridine	Nucleosides, nucleotides, and analogues
	4-Methyl-2-oxovaleric acid	organic acid
	Ornithine	amino acid
	Isovalerylcarnitine	Carnitines & acylcarnitines
	Pyridoxal	vitamines
	5-Methoxytryptophan	amino acid
	3-Methyl-2-oxovaleric acid	organic acid
	Rhamnose	Carbohydrates and carbohydrate conjugates
Drug combination	Carnosine	amino acid
	Alanine	amino acid
	Hippuric acid	organic acid
	Creatinine	amino acid
	Valine	amino acid
	Pyroglutamic acid	amino acid
	Proline	amino acid
	Phenylalanine	amino acid
	Methionine	amino acid
	Butyrylcarnitine	Carnitines & acylcarnitines
	Citric acid	organic acid
	Pyridoxine	vitamines

## Sheet: Figure 6 iii
		Metabolites
No	Pathway	Untreated	Drug combination
1	Beta Oxidation of Very Long Chain Fatty Acids	Carnitine
2	Fatty Acid Biosynthesis	3-Hydroxybutyric acid
3	Valine, Leucine and Isoleucine Degradation	L-Valine; L-Leucine; Ketoleucine; 3-Methyl-2-oxovaleric acid; Succinic acid
4	Glycine and Serine Metabolism	Glycine; Serine--pyruvate aminotransferase; Glycine amidinotransferase, mitochondrial; Guanidoacetic acid; Guanidinoacetate N-methyltransferase; Phosphoserine phosphatase
5	Pyrimidine Metabolism	Uridine; Ureidopropionic acid; Deoxycytidine; Dihydrothymine
6	Arginine and Proline Metabolism	Citrulline; L-Arginine; Succinic acid; Glycine; Guanidoacetic	-
		acid; Creatine
7	Histidine Metabolism	Carnosine; L-Histidine; 3-Methylhistidine
8	Methionine Metabolism	Glycine; L-Cysteine; L-Homoserine; Betaine; Choline; Methionine sulfoxide
9	Betaine Metabolism	Betaine; Choline
10	Beta-Alanine Metabolism	-	3-Methylhistidine; Carnosine; L‑Histidine; Ureidopropionic acid; Pantothenic acid
11	Transfer of Acetyl Groups into Mitochondria	-	Citric acid
12	Tricarboxylic Acid Cycle	-	Citric acid; Succinic acid; cis‑Aconitic acid
13	Phenylalanine and Tyrosine Metabolism	-	L-Phenylalanine; L-Tyrosine

## Sheet: top metabolites supervised
Untreated
Category	Pathway	Metabolites			Total
HR	Phenylalanine metabolism	3-Phenyllactic acid			1
HR	Tryptophan Metabolism	Indole-3-lactic acid	5-Methoxytryptophan		2
LR	Tryptophan Metabolism	Tryptophan			1
HR	Arginine and proline metabolism	4-Guanidinobutyric acid			1
LR	Arginine and lysine metabolism	Homoarginine			1
HR	Glycine and Serine Metabolism	4-Guanidinobutyric acid			1
HR	Fatty Acid Biosynthesis	3-Hydroxybutyric acid	8-Aminooctanoic acid	Isovalerylcarnitine	3
LR	Fatty Acid Biosynthesis	Carnitine			1
HR	Purine metabolism/methylation	1-Methyl Adenosine			1
HR	Aspartate Metabolism	N-Acetyl-aspartic acid			1
HR	GSH	Cystine			1
LR	Arginine biosynthesis	N-Acetyl-ornithine			1
LR	Arginine and proline metabolism	Guanidoacetic acid	Ornithine		2
LR	Glycine and Serine Metabolism	Guanidoacetic acid	Betaine	Ornithine	3
LR	Methionine Metabolism	Betaine			1
LR	Betaine Metabolism	Betaine			1
LR	Histidine Metabolism	3-Methylhistidine			1
LR	Carnitine synthesis	Glycine			1
LR	GSH	Glycine	Ornithine		2
LR	Pyrimidine Metabolism	Uridine			1
HR	Valine, Leucine and Isoleucine Degradation	4-Methyl-2-oxovaleric acid	3-Methyl-2-oxovaleric acid		2
HR	Vitamin B6 Metabolism	Pyridoxal			1
Drug combination
Category	Pathway	Metabolites								Total
LR	amino acids metabolism	Carnosine	Alanine	Hippuric acid	Creatinine	Valine	Proline	Phenylalanine	Methionine	8
LR	GSH	Pyroglutamic acid								1
LR	Fatty Acid Biosynthesis	Butyrylcarnitine								1
LR	TCA cycle/Warburg effect	Citric acid								1
LR	Vitamin B6 Metabolism	Pyridoxine								1
